# Supplementary material for: Exploring the DNA-recognition potential of homeodomains
Source: HighWire-hosted journal article supplement (doi:10.1101/gr.139014.112), 2012-04-26
Supplement: chu_SupTableS1.xlsx [file chu_SupTableS1.xlsx]

## Sheet: Sheet1
Barcode	Barcode Strand 1 Sequence (no phosphorylation)	Barcode Strand 2 Sequence (no phosphorylation)
AA	aaAGATCGGAAGAGCGTCGTGTAGGGAAAGAGTGT	ACACTCTTTCCCTACACGACGCTCTTCCGATCTttT
CA	caAGATCGGAAGAGCGTCGTGTAGGGAAAGAGTGT	ACACTCTTTCCCTACACGACGCTCTTCCGATCTtgT
GA	gaAGATCGGAAGAGCGTCGTGTAGGGAAAGAGTGT	ACACTCTTTCCCTACACGACGCTCTTCCGATCTtcT
TA	taAGATCGGAAGAGCGTCGTGTAGGGAAAGAGTGT	ACACTCTTTCCCTACACGACGCTCTTCCGATCTtaT
AC	acAGATCGGAAGAGCGTCGTGTAGGGAAAGAGTGT	ACACTCTTTCCCTACACGACGCTCTTCCGATCTgtT
CC	ccAGATCGGAAGAGCGTCGTGTAGGGAAAGAGTGT	ACACTCTTTCCCTACACGACGCTCTTCCGATCTggT
GC	gcAGATCGGAAGAGCGTCGTGTAGGGAAAGAGTGT	ACACTCTTTCCCTACACGACGCTCTTCCGATCTgcT
TC	tcAGATCGGAAGAGCGTCGTGTAGGGAAAGAGTGT	ACACTCTTTCCCTACACGACGCTCTTCCGATCTgaT
AG	agAGATCGGAAGAGCGTCGTGTAGGGAAAGAGTGT	ACACTCTTTCCCTACACGACGCTCTTCCGATCTctT
CG	cgAGATCGGAAGAGCGTCGTGTAGGGAAAGAGTGT	ACACTCTTTCCCTACACGACGCTCTTCCGATCTcgT
GG	ggAGATCGGAAGAGCGTCGTGTAGGGAAAGAGTGT	ACACTCTTTCCCTACACGACGCTCTTCCGATCTccT
TG	tgAGATCGGAAGAGCGTCGTGTAGGGAAAGAGTGT	ACACTCTTTCCCTACACGACGCTCTTCCGATCTcaT
AT	atAGATCGGAAGAGCGTCGTGTAGGGAAAGAGTGT	ACACTCTTTCCCTACACGACGCTCTTCCGATCTatT
CT	ctAGATCGGAAGAGCGTCGTGTAGGGAAAGAGTGT	ACACTCTTTCCCTACACGACGCTCTTCCGATCTagT
GT	gtAGATCGGAAGAGCGTCGTGTAGGGAAAGAGTGT	ACACTCTTTCCCTACACGACGCTCTTCCGATCTacT
TT	ttAGATCGGAAGAGCGTCGTGTAGGGAAAGAGTGT	ACACTCTTTCCCTACACGACGCTCTTCCGATCTaaT
TTT	aaaAGATCGGAAGAGCGTCGTGTAGGGAAAGAGTGT	ACACTCTTTCCCTACACGACGCTCTTCCGATCTtttT
TGT	acaAGATCGGAAGAGCGTCGTGTAGGGAAAGAGTGT	ACACTCTTTCCCTACACGACGCTCTTCCGATCTtgtT
TCT	agaAGATCGGAAGAGCGTCGTGTAGGGAAAGAGTGT	ACACTCTTTCCCTACACGACGCTCTTCCGATCTtctT
TAT	ataAGATCGGAAGAGCGTCGTGTAGGGAAAGAGTGT	ACACTCTTTCCCTACACGACGCTCTTCCGATCTtatT
GTT	gttAGATCGGAAGAGCGTCGTGTAGGGAAAGAGTGT	ACACTCTTTCCCTACACGACGCTCTTCCGATCTcaaT
GGT	ggtAGATCGGAAGAGCGTCGTGTAGGGAAAGAGTGT	ACACTCTTTCCCTACACGACGCTCTTCCGATCTccaT
GCT	gctAGATCGGAAGAGCGTCGTGTAGGGAAAGAGTGT	ACACTCTTTCCCTACACGACGCTCTTCCGATCTcgaT
GAT	ctaAGATCGGAAGAGCGTCGTGTAGGGAAAGAGTGT	ACACTCTTTCCCTACACGACGCTCTTCCGATCTgatT
CTT	gaaAGATCGGAAGAGCGTCGTGTAGGGAAAGAGTGT	ACACTCTTTCCCTACACGACGCTCTTCCGATCTcttT
CGT	gcaAGATCGGAAGAGCGTCGTGTAGGGAAAGAGTGT	ACACTCTTTCCCTACACGACGCTCTTCCGATCTcgtT
CCT	ggaAGATCGGAAGAGCGTCGTGTAGGGAAAGAGTGT	ACACTCTTTCCCTACACGACGCTCTTCCGATCTcctT
CAT	gtaAGATCGGAAGAGCGTCGTGTAGGGAAAGAGTGT	ACACTCTTTCCCTACACGACGCTCTTCCGATCTcatT
ATT	taaAGATCGGAAGAGCGTCGTGTAGGGAAAGAGTGT	ACACTCTTTCCCTACACGACGCTCTTCCGATCTattT
AGT	tcaAGATCGGAAGAGCGTCGTGTAGGGAAAGAGTGT	ACACTCTTTCCCTACACGACGCTCTTCCGATCTagtT
ACT	tgaAGATCGGAAGAGCGTCGTGTAGGGAAAGAGTGT	ACACTCTTTCCCTACACGACGCTCTTCCGATCTactT
AAT	ttaAGATCGGAAGAGCGTCGTGTAGGGAAAGAGTGT	ACACTCTTTCCCTACACGACGCTCTTCCGATCTaatT
TTCT	agaaAGATCGGAAGAGCGTCGTGTAGGGAAAGAGTGT	ACACTCTTTCCCTACACGACGCTCTTCCGATCTttctT
TGGA	tccaAGATCGGAAGAGCGTCGTGTAGGGAAAGAGTGT	ACACTCTTTCCCTACACGACGCTCTTCCGATCTtggaT
TCAC	gtgaAGATCGGAAGAGCGTCGTGTAGGGAAAGAGTGT	ACACTCTTTCCCTACACGACGCTCTTCCGATCTtcacT
TATG	cataAGATCGGAAGAGCGTCGTGTAGGGAAAGAGTGT	ACACTCTTTCCCTACACGACGCTCTTCCGATCTtatgT
GTGC	gcacAGATCGGAAGAGCGTCGTGTAGGGAAAGAGTGT	ACACTCTTTCCCTACACGACGCTCTTCCGATCTgtgcT
GGCG	cgccAGATCGGAAGAGCGTCGTGTAGGGAAAGAGTGT	ACACTCTTTCCCTACACGACGCTCTTCCGATCTggcgT
GCTT	aagcAGATCGGAAGAGCGTCGTGTAGGGAAAGAGTGT	ACACTCTTTCCCTACACGACGCTCTTCCGATCTgcttT
GAAA	tttcAGATCGGAAGAGCGTCGTGTAGGGAAAGAGTGT	ACACTCTTTCCCTACACGACGCTCTTCCGATCTgaaaT
CTAG	ctagAGATCGGAAGAGCGTCGTGTAGGGAAAGAGTGT	ACACTCTTTCCCTACACGACGCTCTTCCGATCTctagT
CGTC	gacgAGATCGGAAGAGCGTCGTGTAGGGAAAGAGTGT	ACACTCTTTCCCTACACGACGCTCTTCCGATCTcgtcT
CCCA	tgggAGATCGGAAGAGCGTCGTGTAGGGAAAGAGTGT	ACACTCTTTCCCTACACGACGCTCTTCCGATCTcccaT
CAGT	actgAGATCGGAAGAGCGTCGTGTAGGGAAAGAGTGT	ACACTCTTTCCCTACACGACGCTCTTCCGATCTcagtT
ATTA	taatAGATCGGAAGAGCGTCGTGTAGGGAAAGAGTGT	ACACTCTTTCCCTACACGACGCTCTTCCGATCTattaT
AGAT	atctAGATCGGAAGAGCGTCGTGTAGGGAAAGAGTGT	ACACTCTTTCCCTACACGACGCTCTTCCGATCTagatT
AACC	ggttAGATCGGAAGAGCGTCGTGTAGGGAAAGAGTGT	ACACTCTTTCCCTACACGACGCTCTTCCGATCTaaccT
