# Supplementary material for: Exploring the DNA-recognition potential of homeodomains
Source: HighWire-hosted journal article supplement (doi:10.1101/gr.139014.112), 2012-04-26
Supplement: chu_SupTableS2.xlsx [file chu_SupTableS2.xlsx]

## Sheet: Sheet1
The triplet binding site of the HD selection	Barcode	Restriction Site
TTT	TTCT	BamHI
TTG	TGGA	BamHI
TTC	TCAC	BamHI
TTA	TATG	BamHI
TGT	GTGC	BamHI
TGG	GGCG	BamHI
TGC	GCTT	BamHI
TGA	GAAA	BamHI
TCT	CTAG	BamHI
TCG	CGTC	BamHI
TCC	CAGT	BamHI
TCA	CCCA	BamHI
TAT	ATTA	BamHI
TAG	AGAT	BamHI
TAC	ACGG	BamHI
TAA	AACC	BamHI
GTT	TTT	BamHI
GTG	TGT	BamHI
GTC	TCT	BamHI
GTA	TAT	BamHI
GGT	GTT	BamHI
GGG	GGT	BamHI
GGC	GCT	BamHI
GGA	GAT	BamHI
GCT	CTT	BamHI
GCG	CGT	BamHI
GCC	CCT	BamHI
GCA	CAT	BamHI
GAT	ATT	BamHI
GAG	AGT	BamHI
GAC	ACT	BamHI
GAA	AAT	BamHI
CTT	TTCT	XbaI
CTG	TGGA	XbaI
CTC	TCAC	XbaI
CTA	TATG	XbaI
CGT	GTGC	XbaI
CGG	GGCG	XbaI
CGC	GCTT	XbaI
CGA	GAAA	XbaI
CCT	CTAG	XbaI
CCG	CGTC	XbaI
CCC	CCCA	XbaI
CCA	CAGT	XbaI
CAT	ATTA	XbaI
CAG	AGAT	XbaI
CAC	ACGG	XbaI
CAA	AACC	XbaI
ATT	TTT	XbaI
ATG	TGT	XbaI
ATC	TCT	XbaI
ATA	TAT	XbaI
AGT	GTT	XbaI
AGG	GGT	XbaI
AGC	GCT	XbaI
AGA	GAT	XbaI
ACT	CTT	XbaI
ACG	CGT	XbaI
ACC	CCT	XbaI
ACA	CAT	XbaI
AAT	ATT	XbaI
AAG	AGT	XbaI
AAC	ACT	XbaI
AAA	AAT	XbaI
