# Supplementary material for: Exploring the DNA-recognition potential of homeodomains
Source: HighWire-hosted journal article supplement (doi:10.1101/gr.139014.112), 2012-04-26
Supplement: chu_SupTableS3.xlsx [file chu_SupTableS3.xlsx]

## Sheet: Sheet1
Clones identified for each 3' binding site via Illumina sequencing, where the column label indicates the 3' triplet in the target site.
AAC	AAC	AAG	AAT	ACA	ACC	ACG	ACT	AGA	AGC	AGG	AGT	ATA	ATC	ATG	ATT	CAA	CAC	CAG	CAT	CCA	CCC	CCG	CCT	CGA	CGC	CGG	CGT	CTA	CTC	CTG	CTT	GAA	GAC	GAG	GAT	GCA	GCC	GCG	GCT	GGA	GGC	GGG	GGT	GTA	GTC	GTG	GTT	TAA	TAC
>0.3182.AAA	>0.1150.AAC	>0.3770.AAG	>0.2980.AAT	>0.2640.ACA	>0.3892.ACC	>0.5997.ACG	>0.5437.ACT	>0.4324.AGA	>0.4274.AGC	>0.4141.AGG	>0.1842.AGT	>0.1340.ATA	>0.17627.ATC	>0.2990.ATG	>0.1123.ATT	>0.1950.CAA	>0.669.CAC	>0.4488.CAG	>0.490.CAT	>0.2208.CCA	>0.5903.CCC	>0.17593.CCG	>0.11781.CCT	>0.3362.CGA	>0.2438.CGC	>0.13875.CGG	>0.20177.CGT	>0.1707.CTA	>0.13834.CTC	>0.13857.CTG	>0.2982.CTT	>0.496.GAA	>0.59.GAC	>0.1466.GAG	>0.271.GAT	>0.905.GCA	>0.1713.GCC	>0.361.GCG	>0.177.GCT	>0.2088.GGA	>0.5585.GGC	>0.2497.GGG	>0.479.GGT	>0.409.GTA	>0.2883.GTC	>0.5627.GTG	>0.1997.GTT	>0.3933.TAA	>0.1466.TAC
EKQIYYWFCNKRWKIKKS	ELQILSWFRNKRHKIKKS	ERQITQWFWNKRFKIKKS	ESQISLWFINKRFKIKKS	EQQILNWFNNKRRKIKKS	ESQISSWFHNKRTKIKKS	EKQIQYWFENKRRKIKKS	ELQIHLWFGNKRIKIKKS	EIQIVYWFRNKRSKIKKS	EQQISRWFNNKRVKIKKS	ERQIAKWFENKRGKIKKS	ENQIKKWFENKRSKIKKS	ELQILRWFANKRFKIKKS	ECQIASWFHNKRNKIKKS	ERQIVYWFQNKRWKIKKS	ERQIIVWFQNKRSKIKKS	EVQIFYWFANKRRKIKKS	EQQISMWFRNKRRKIKKS	ELQISYWFWNKRRKIKKS	EVQIYYWFSNKRRKIKKS	ERQIADWFSNKRKKIKKS	EVQISNWFSNKRKKIKKS	EKQIVYWFENKRRKIKKS	EVQIMNWFSNKRKKIKKS	EAQIAYWFANKRAKIKKS	EVQISYWFSNKRRKIKKS	EKQINRWFENKRRKIKKS	ERQIEDWFSNKRRKIKKS	ERQIFHWFSNKRKKIKKS	EVQIRYWFSNKRKKIKKS	EKQIQYWFENKRRKIKKS	EKQIMYWFGNKRSKIKKS	ETQISYWFKNKRWKIKKS	EEQINRWFRNKRFKIKKS	ERQISVWFWNKRYKIKKS	EVQIMVWFRNKRWKIKKS	ERQIYHWFRNKRYKIKKS	EGQIRVWFKNKRWKIKKS	ERQILDWFRNKRYKIKKS	EMQIGDWFRNKRYKIKKS	ERQISKWFDNKRHKIKKS	ESQIMKWFNNKRTKIKKS	EKQIVKWFENKRRKIKKS	EIQILRWFNNKRYKIKKS	EVQILRWFQNKRGKIKKS	EQQIMKWFRNKRCKIKKS	ESQIAKWFENKRWKIKKS	EKQIITWFSNKRYKIKKS	ERQIVIWFRNKRAKIKKS	EEQIRVWFSNKRAKIKKS
>1.1651.AAA	>1.666.AAC	>1.2587.AAG	>1.2520.AAT	>1.2461.ACA	>1.3822.ACC	>1.4205.ACG	>1.4774.ACT	>1.2629.AGA	>1.3191.AGC	>1.3435.AGG	>1.1710.AGT	>1.1276.ATA	>1.6016.ATC	>1.2701.ATG	>1.1088.ATT	>1.1154.CAA	>1.442.CAC	>1.3681.CAG	>1.436.CAT	>1.2095.CCA	>1.2949.CCC	>1.10274.CCG	>1.6116.CCT	>1.2812.CGA	>1.2413.CGC	>1.9227.CGG	>1.8400.CGT	>1.1698.CTA	>1.10530.CTC	>1.7225.CTG	>1.1681.CTT	>1.468.GAA	>1.55.GAC	>1.1463.GAG	>1.181.GAT	>1.821.GCA	>1.864.GCC	>1.272.GCG	>1.134.GCT	>1.1957.GGA	>1.4193.GGC	>1.1912.GGG	>1.432.GGT	>1.310.GTA	>1.1690.GTC	>1.3760.GTG	>1.1061.GTT	>1.3345.TAA	>1.629.TAC
ELQIHYWFVNKRHKIKKS	EKQISAWFRNKRFKIKKS	EKQIKQWFWNKRFKIKKS	ESQIRNWFGNKRHKIKKS	ENQIGNWFNNKRRKIKKS	EKQILTWFSNKRKKIKKS	EKQIRYWFDNKRRKIKKS	EVQIKYWFENKRRKIKKS	ELQIFRWFANKRWKIKKS	EKQIARWFNNKRVKIKKS	EPQISWWFVNKRTKIKKS	ERQIKSWFQNKRWKIKKS	EKQISSWFCNKRNKIKKS	ESQIAQWFRNKRRKIKKS	ERQIVYWFQNKRWKIKKS	EGQIRVWFQNKRAKIKKS	ELQIHYWFANKRRKIKKS	ELQIMYWFSNKRRKIKKS	ETQISNWFWNKRRKIKKS	EVQISNWFGNKRRKIKKS	ERQIHNWFANKRKKIKKS	EKQIMTWFNNKRKKIKKS	EVQIRDWFQNKRKKIKKS	EKQISNWFSNKRKKIKKS	EMQIFYWFANKRAKIKKS	EVQIMYWFNNKRRKIKKS	ERQISHWFENKRRKIKKS	EKQIDYWFNNKRRKIKKS	ESQIFMWFANKRKKIKKS	EMQIQYWFGNKRKKIKKS	ECQITNWFQNKRKKIKKS	EKQIDYWFGNKRKKIKKS	EFQILRWFQNKRWKIKKS	EVQIVRWFRNKRWKIKKS	EEQIQRWFWNKRYKIKKS	EGQIADWFRNKRYKIKKS	EVQIMRWFQNKRLKIKKS	ERQIWCWFKNKRFKIKKS	EPQILDWFRNKRYKIKKS	EQQIMDWFRNKRFKIKKS	EKQIGKWFDNKRMKIKKS	EYQILKWFNNKRQKIKKS	ETQILKWFENKRRKIKKS	ESQILRWFDNKRQKIKKS	EGQILRWFQNKRGKIKKS	EQQIGKWFRNKRAKIKKS	EGQIGRWFENKRYKIKKS	ELQIVRWFSNKRFKIKKS	EKQIIIWFNNKRAKIKKS	EEQIRVWFSNKRAKIKKS
>2.1530.AAA	>2.604.AAC	>2.1828.AAG	>2.2355.AAT	>2.1792.ACA	>2.3473.ACC	>2.3811.ACG	>2.2958.ACT	>2.2212.AGA	>2.3143.AGC	>2.2307.AGG	>2.1703.AGT	>2.1130.ATA	>2.4506.ATC	>2.2010.ATG	>2.1060.ATT	>2.963.CAA	>2.402.CAC	>2.3178.CAG	>2.341.CAT	>2.1490.CCA	>2.2380.CCC	>2.4327.CCG	>2.5091.CCT	>2.2542.CGA	>2.2296.CGC	>2.8534.CGG	>2.7522.CGT	>2.1586.CTA	>2.8545.CTC	>2.4636.CTG	>2.1311.CTT	>2.428.GAA	>2.53.GAC	>2.1278.GAG	>2.181.GAT	>2.775.GCA	>2.754.GCC	>2.272.GCG	>2.126.GCT	>2.1773.GGA	>2.3972.GGC	>2.1622.GGG	>2.416.GGT	>2.200.GTA	>2.1204.GTC	>2.3244.GTG	>2.897.GTT	>2.2027.TAA	>2.593.TAC
EVQIRTWFRNKREKIKKS	ERQISSWFRNKRFKIKKS	EKQIAQWFWNKRFKIKKS	EKQIIAWFSNKRFKIKKS	EIQISRWFWNKRRKIKKS	ERQISNWFHNKRVKIKKS	ERQIVNWFENKRRKIKKS	ERQILTWFQNKRKKIKKS	ERQIFRWFANKRWKIKKS	ERQITRWFNNKRVKIKKS	ERQILKWFENKRQKIKKS	EGQIVRWFENKRYKIKKS	ELQIRWWFNNKRSKIKKS	EWQISQWFVNKRNKIKKS	EGQIAGWFLNKRVKIKKS	EIQIKVWFQNKRAKIKKS	ELQIMYWFQNKRRKIKKS	ELQIAYWFSNKRRKIKKS	EKQIMWWFWNKRRKIKKS	EVQISNWFGNKRRKIKKS	ELQILYWFQNKRKKIKKS	ERQIACWFSNKRKKIKKS	EQQIVMWFHNKRRKIKKS	ERQIANWFSNKRKKIKKS	EKQIFYWFSNKRCKIKKS	EQQIRYWFSNKRVKIKKS	EVQICRWFENKRRKIKKS	EVQIMHWFNNKRRKIKKS	EGQIFNWFANKRKKIKKS	EIQIRYWFSNKRKKIKKS	EKQIRYWFENKRRKIKKS	EKQIGMWFLNKRRKIKKS	EQQIFQWFKNKRYKIKKS	EEQIVRWFRNKRWKIKKS	ENQISRWFWNKRYKIKKS	EDQIGKWFVNKRYKIKKS	EGQIAKWFQNKRAKIKKS	EGQIMRWFKNKRWKIKKS	EPQIMDWFRNKRYKIKKS	EEQIQDWFRNKRYKIKKS	ERQISKWFDNKRFKIKKS	ESQIRKWFSNKREKIKKS	EMQIMKWFENKRRKIKKS	EMQISKWFDNKRQKIKKS	EKQIVKWFQNKRRKIKKS	ERQIRRWFGNKRFKIKKS	EMQISKWFENKRWKIKKS	EMQIVRWFGNKRAKIKKS	ERQILTWFSNKRAKIKKS	EEQIRVWFSNKRVKIKKS
>3.1502.AAA	>3.430.AAC	>3.1797.AAG	>3.2269.AAT	>3.1659.ACA	>3.3419.ACC	>3.3182.ACG	>3.2802.ACT	>3.2094.AGA	>3.2686.AGC	>3.1989.AGG	>3.1223.AGT	>3.1104.ATA	>3.4014.ATC	>3.1902.ATG	>3.994.ATT	>3.926.CAA	>3.384.CAC	>3.2865.CAG	>3.331.CAT	>3.1428.CCA	>3.2137.CCC	>3.3710.CCG	>3.4419.CCT	>3.2340.CGA	>3.1998.CGC	>3.7256.CGG	>3.7288.CGT	>3.1509.CTA	>3.8420.CTC	>3.4294.CTG	>3.1249.CTT	>3.371.GAA	>3.49.GAC	>3.1026.GAG	>3.179.GAT	>3.638.GCA	>3.623.GCC	>3.248.GCG	>3.122.GCT	>3.1378.GGA	>3.3155.GGC	>3.1589.GGG	>3.412.GGT	>3.168.GTA	>3.849.GTC	>3.2507.GTG	>3.872.GTT	>3.1975.TAA	>3.541.TAC
ERQINSWFSNKRHKIKKS	ERQIVSWFRNKRFKIKKS	EKQIKQWFWNKRHKIKKS	ERQISSWFTNKRFKIKKS	EIQIANWFNNKRRKIKKS	EKQIRNWFDNKRKKIKKS	EKQIVYWFENKRRKIKKS	EKQIRYWFENKRRKIKKS	ESQIFRWFANKRHKIKKS	EQQINPWFINKRWKIKKS	ERQIYKWFENKRRKIKKS	ESQISKWFENKRYKIKKS	EKQIASWFANKRSKIKKS	EIQITQWFGNKRYKIKKS	EKQIVYWFQNKRWKIKKS	ETQITQWF_NKRLKIKKS	ELQIHYWFCNKRRKIKKS	EMQIMMWFRNKRRKIKKS	EMQISHWFWNKRRKIKKS	ERQISNWFGNKRRKIKKS	EVQIANWFANKRKKIKKS	ELQIMNWFSNKRKKIKKS	ELQISYWFENKRKKIKKS	ETQISNWFGNKRKKIKKS	EYQIFTWFANKRRKIKKS	EAQIRNWFSNKRRKIKKS	EKQIARWFENKRRKIKKS	EVQIYNWFSNKRRKIKKS	EQQIAYWFANKRKKIKKS	ERQIRFWFSNKRKKIKKS	EKQIRYWFENKRKKIKKS	EQQIAYWFANKRKKIKKS	EFQIFNWFKNKRYKIKKS	ERQIERWFRNKRWKIKKS	EAQITRWFWNKRYKIKKS	EVQITRWFLNKRYKIKKS	ERQIIKWFQNKRRKIKKS	EQQIWRWFKNKRFKIKKS	ELQIADWFRNKRYKIKKS	ERQIADWFRNKRYKIKKS	EMQITKWFDNKRFKIKKS	EGQITKWFNNKRQKIKKS	EKQIQKWFENKRRKIKKS	ERQIHKWFDNKRQKIKKS	EGQILRWFQNKRWKIKKS	ERQIGKWFRNKRAKIKKS	EVQIGKWFENKRAKIKKS	ETQINRWFANKRYKIKKS	ERQIVLWFRNKRAKIKKS	EEQIRVWFSNKRVKIKKS
>4.1296.AAA	>4.422.AAC	>4.1581.AAG	>4.1903.AAT	>4.1499.ACA	>4.3417.ACC	>4.2851.ACG	>4.2733.ACT	>4.2005.AGA	>4.2665.AGC	>4.1916.AGG	>4.1114.AGT	>4.1103.ATA	>4.3752.ATC	>4.1814.ATG	>4.941.ATT	>4.737.CAA	>4.332.CAC	>4.2630.CAG	>4.299.CAT	>4.1419.CCA	>4.1993.CCC	>4.3164.CCG	>4.4091.CCT	>4.2157.CGA	>4.1948.CGC	>4.6891.CGG	>4.7142.CGT	>4.1451.CTA	>4.8155.CTC	>4.3812.CTG	>4.1220.CTT	>4.319.GAA	>4.49.GAC	>4.879.GAG	>4.142.GAT	>4.612.GCA	>4.491.GCC	>4.177.GCG	>4.116.GCT	>4.1367.GGA	>4.1834.GGC	>4.1215.GGG	>4.352.GGT	>4.165.GTA	>4.716.GTC	>4.2244.GTG	>4.774.GTT	>4.1836.TAA	>4.521.TAC
EKQILTWFANKRFKIKKS	ERQICAWFRNKRFKIKKS	ERQIAQWFWNKRFKIKKS	EKQIVSWFSNKRFKIKKS	EKQINDWFNNKRRKIKKS	ELQIVYWFHNKRTKIKKS	EKQIKRWFENKRRKIKKS	EKQIASWFHNKRVKIKKS	ERQIVYWFNNKRWKIKKS	EVQILRWFNNKRVKIKKS	EQQIMKWFENKRQKIKKS	ESQIKKWFENKRFKIKKS	EKQIASWFANKRVKIKKS	EKQILEWFQNKRTKIKKS	ERQIRYWFQNKRWKIKKS	EIQINCWFMNKRMKIKKS	ELQIFNWFANKRRKIKKS	EMQIAMWFRNKRRKIKKS	EPQISYWFWNKRRKIKKS	ERQIGNWFSNKRRKIKKS	EMQILYWFQNKRKKIKKS	ERQIADWFSNKRKKIKKS	EGQIHDWFANKRKKIKKS	ETQISNWFGNKRKKIKKS	EAQIHNWFANKRRKIKKS	ERQISMWFSNKRRKIKKS	EMQISHWFENKRRKIKKS	EQQIGNWFSNKRRKIKKS	ECQITFWFANKRKKIKKS	ERQILNWFSNKRKKIKKS	ETQITNWFQNKRKKIKKS	ETQIRDWFGNKRRKIKKS	ELQIFHWFKNKRMKIKKS	EGQIERWFRNKRYKIKKS	ELQISRWFWNKRYKIKKS	EKQITRWFLNKRYKIKKS	ERQIHDWFRNKRRKIKKS	EVQIGIWFKNKRYKIKKS	ELQILDWFRNKRYKIKKS	ERQIDDWFRNKRYKIKKS	ELQISKWFDNKRQKIKKS	ETQIGKWFNNKRMKIKKS	EVQIAKWFENKRRKIKKS	ELQIAKWFDNKRYKIKKS	ELQIFNWFRNKRLKIKKS	EVQISKWFRNKRFKIKKS	EWQIGKWFENKRFKIKKS	EVQILRWFGNKRAKIKKS	ERQIMLWFCNKRAKIKKS	EEQIRVWFSNKRAKIKKS
>5.1268.AAA	>5.415.AAC	>5.1481.AAG	>5.1793.AAT	>5.1466.ACA	>5.3102.ACC	>5.2818.ACG	>5.2501.ACT	>5.1308.AGA	>5.1914.AGC	>5.1838.AGG	>5.1112.AGT	>5.969.ATA	>5.2376.ATC	>5.1689.ATG	>5.915.ATT	>5.700.CAA	>5.328.CAC	>5.2583.CAG	>5.295.CAT	>5.1398.CCA	>5.1964.CCC	>5.3029.CCG	>5.3599.CCT	>5.2030.CGA	>5.1862.CGC	>5.4903.CGG	>5.6842.CGT	>5.1316.CTA	>5.6547.CTC	>5.3476.CTG	>5.1092.CTT	>5.310.GAA	>5.46.GAC	>5.709.GAG	>5.115.GAT	>5.578.GCA	>5.459.GCC	>5.164.GCG	>5.115.GCT	>5.1294.GGA	>5.1490.GGC	>5.1203.GGG	>5.352.GGT	>5.148.GTA	>5.695.GTC	>5.1886.GTG	>5.747.GTT	>5.1739.TAA	>5.472.TAC
EKQIAQWFWNKRFKIKKS	ERQISSWFRNKRFKIKKS	ERQITQWFWNKRHKIKKS	ERQIMCWFSNKRFKIKKS	EKQIRYWFENKRRKIKKS	ESQIVSWFHNKRMKIKKS	EKQIRYWFENKRRKIKKS	EKQIKYWFENKRKKIKKS	ENQIRYWFNNKRWKIKKS	EVQIARWFNNKRVKIKKS	EKQINKWFENKRSKIKKS	EIQIKKWFENKRFKIKKS	EHQIRGWFANKRHKIKKS	EVQIRMWFANKRYKIKKS	EMQIVYWFQNKRWKIKKS	ERQIVVWFQNKRSKIKKS	ESQIMYWFQNKRRKIKKS	EMQIAMWFRNKRRKIKKS	ELQISWWFWNKRRKIKKS	ESQIGNWFSNKRRKIKKS	EAQIRTWFQNKRKKIKKS	ELQIAYWFSNKRKKIKKS	EVQISNWFQNKRKKIKKS	ERQIMNWFSNKRKKIKKS	EIQIFNWFANKRKKIKKS	ESQISNWFSNKRRKIKKS	ETQIGHWFENKRRKIKKS	ETQIANWFSNKRRKIKKS	ELQIFHWFSNKRKKIKKS	NEVQIMNWFRNKRKIKKS	EKQITYWFENKRKKIKKS	ELQITYWFGNKRQKIKKS	ENQISHWFKNKRFKIKKS	EVQIVRWFRNKRFKIKKS	ELQISRWFWNKRWKIKKS	EWQISRWFLNKRYKIKKS	EGQIHDWFRNKRAKIKKS	ERQIYCWFKNKRYKIKKS	EGQITDWFRNKRYKIKKS	EKQILDWFRNKRFKIKKS	EQQIAKWFDNKRQKIKKS	EAQITKWFNNKRQKIKKS	ERQISKWFENKRRKIKKS	EWQIIKWFSNKREKIKKS	EKQIARWFDNKRAKIKKS	ESQIGKWFRNKRFKIKKS	ELQIARWFENKRYKIKKS	EIQIRVWFANKRYKIKKS	ERQILTWFSNKRAKIKKS	EEQIRVWFSNKRVKIKKS
>6.1268.AAA	>6.390.AAC	>6.1391.AAG	>6.1576.AAT	>6.1434.ACA	>6.2681.ACC	>6.2589.ACG	>6.2226.ACT	>6.1216.AGA	>6.1753.AGC	>6.1559.AGG	>6.1066.AGT	>6.810.ATA	>6.2338.ATC	>6.1606.ATG	>6.875.ATT	>6.554.CAA	>6.319.CAC	>6.2560.CAG	>6.292.CAT	>6.1353.CCA	>6.1847.CCC	>6.2525.CCG	>6.3347.CCT	>6.1914.CGA	>6.1842.CGC	>6.4370.CGG	>6.6337.CGT	>6.1283.CTA	>6.6048.CTC	>6.3402.CTG	>6.1069.CTT	>6.304.GAA	>6.46.GAC	>6.702.GAG	>6.112.GAT	>6.572.GCA	>6.437.GCC	>6.161.GCG	>6.107.GCT	>6.1245.GGA	>6.1355.GGC	>6.1153.GGG	>6.339.GGT	>6.147.GTA	>6.661.GTC	>6.1780.GTG	>6.697.GTT	>6.1619.TAA	>6.453.TAC
ELQIAYWFVNKRHKIKKS	EGQIGQWFRNKRFKIKKS	ERQIQQWFWNKRFKIKKS	ERQINAWFSNKRFKIKKS	ERQIGDWFNNKRRKIKKS	EKQIGYWFHNKRVKIKKS	EWQIVAWFKNKRYKIKKS	EQQIRVWFKNKRYKIKKS	ETQIFRWFANKRQKIKKS	ETQIVRWFNNKRVKIKKS	ERQISKWFENKRRKIKKS	EGQIRKWFENKRWKIKKS	ELQIRWWFNNKRAKIKKS	ERQIRRWFGNKRTKIKKS	EKQIIFWFQNKRWKIKKS	EEQISMWFANKRTKIKKS	ERQIMFWFQNKRKKIKKS	EMQIAMWFRNKRRKIKKS	ECQISWWFWNKRRKIKKS	EVQIINWFANKRRKIKKS	EKQILTWFQNKRKKIKKS	EKQILTWFSNKRKKIKKS	EKQILDWFQNKRKKIKKS	ENQISNWFSNKRKKIKKS	ESQIFNWFANKRRKIKKS	EGQIRDWFSNKRRKIKKS	EKQIVYWFENKRRKIKKS	ESQISNWFSNKRRKIKKS	EKQIKMWFQNKRKKIKKS	ETQISYWFQNKRKKIKKS	EKQILGWFQNKRKKIKKS	ENQIYNWFSNKRKKIKKS	EAQITDWFRNKRWKIKKS	EQQIIRWFRNKRWKIKKS	EGQISRWFWNKRYKIKKS	EVQITRWFLNKRYKIKKS	ETQICRWFQNKRQKIKKS	EVQIVLWFKNKRYKIKKS	ELQIMDWFRNKRFKIKKS	EHQINDWFRNKRYKIKKS	EVQILKWFDNKRQKIKKS	EWQIVKWFNNKRQKIKKS	EGQILKWFENKRAKIKKS	ERQILKWFDNKRQKIKKS	ELQIGRWFQNKRLKIKKS	ELQISKWFRNKRFKIKKS	ESQILRWFENKRYKIKKS	ELQILVWFRNKRYKIKKS	ERQIVTWFANKRAKIKKS	EEQIRVWFSNKRVKIKKS
>7.1226.AAA	>7.375.AAC	>7.1286.AAG	>7.1556.AAT	>7.1390.ACA	>7.2664.ACC	>7.2561.ACG	>7.2056.ACT	>7.1091.AGA	>7.1746.AGC	>7.1525.AGG	>7.987.AGT	>7.806.ATA	>7.2271.ATC	>7.1563.ATG	>7.835.ATT	>7.482.CAA	>7.291.CAC	>7.2367.CAG	>7.290.CAT	>7.1267.CCA	>7.1845.CCC	>7.2376.CCG	>7.3334.CCT	>7.1889.CGA	>7.1829.CGC	>7.4358.CGG	>7.6219.CGT	>7.1277.CTA	>7.5419.CTC	>7.2533.CTG	>7.1052.CTT	>7.299.GAA	>7.46.GAC	>7.676.GAG	>7.111.GAT	>7.571.GCA	>7.399.GCC	>7.152.GCG	>7.102.GCT	>7.1130.GGA	>7.1330.GGC	>7.1078.GGG	>7.321.GGT	>7.138.GTA	>7.571.GTC	>7.1643.GTG	>7.633.GTT	>7.1457.TAA	>7.444.TAC
ERQIGGWFANKRHKIKKS	ESQISSWFRNKRFKIKKS	ERQIMQWFWNKRHKIKKS	EGQISQWFANKRFKIKKS	ECQIINWFNNKRRKIKKS	EPQITYWFDNKRRKIKKS	EQQIVWWFENKRRKIKKS	EVQIGLWFGNKRGKIKKS	ETQISRWFWNKRYKIKKS	EGQISRWFNNKRVKIKKS	EEQILKWFENKRYKIKKS	ERQIRKWFENKRFKIKKS	ERQIRDWFRNKRGKIKKS	EVQIRMWFANKRFKIKKS	EKQICYWFQNKRWKIKKS	ERQITVWFQNKRNKIKKS	EMQIAYWFANKRRKIKKS	ELQIGMWFRNKRRKIKKS	EHQILPWFDNKRCKIKKS	EVQITQWFSNKRRKIKKS	EMQIGYWFQNKRKKIKKS	ETQINNWFSNKRKKIKKS	ECQIRDWFHNKRRKIKKS	ELQISNWFSNKRKKIKKS	ESQIFYWFANKRTKIKKS	EMQIMMWFSNKRRKIKKS	ESQISRWFENKRRKIKKS	ERQISMWFGNKRMKIKKS	ELQIAYWFANKRRKIKKS	ESQIANWFRNKRKKIKKS	ETQIRDWFQNKRKKIKKS	ERQILMWFANKRRKIKKS	EVQITHWFKNKRWKIKKS	ETQIVRWFRNKRWKIKKS	EKQIQVWFWNKRYKIKKS	EGQIARWFLNKRYKIKKS	ERQIMRWFQNKRRKIKKS	ERQIHAWFKNKRYKIKKS	EAQIVDWFRNKRYKIKKS	EPQISDWFRNKRFKIKKS	EKQISKWFDNKREKIKKS	EKQIVKWFSNKRVKIKKS	EAQIVKWFENKRRKIKKS	EKQIMKWFNNKRIKIKKS	ENQILRWFQNKRCKIKKS	EYQIRRWFSNKRAKIKKS	ERQINAWFQNKRYKIKKS	ESQILQWFANKRYKIKKS	EKQILNWFSNKRAKIKKS	EEQIRVWFSNKRAKIKKS
>8.1096.AAA	>8.356.AAC	>8.1208.AAG	>8.1454.AAT	>8.1213.ACA	>8.2572.ACC	>8.2466.ACG	>8.1837.ACT	>8.975.AGA	>8.1741.AGC	>8.1480.AGG	>8.941.AGT	>8.796.ATA	>8.2157.ATC	>8.1427.ATG	>8.832.ATT	>8.475.CAA	>8.277.CAC	>8.2224.CAG	>8.282.CAT	>8.1240.CCA	>8.1821.CCC	>8.2352.CCG	>8.3310.CCT	>8.1879.CGA	>8.1619.CGC	>8.4197.CGG	>8.5961.CGT	>8.1264.CTA	>8.5173.CTC	>8.2180.CTG	>8.794.CTT	>8.276.GAA	>8.45.GAC	>8.651.GAG	>8.105.GAT	>8.480.GCA	>8.356.GCC	>8.149.GCG	>8.101.GCT	>8.1031.GGA	>8.1051.GGC	>8.1029.GGG	>8.314.GGT	>8.137.GTA	>8.510.GTC	>8.1589.GTG	>8.606.GTT	>8.1426.TAA	>8.432.TAC
EKQIYHWFVNKRHKIKKS	EKQISSWFRNKRHKIKKS	ERQIQQWFWNKRFKIKKS	ESQITSWFSNKRFKIKKS	EKQIMTWFQNKRRKIKKS	EVQIINWFANKRKKIKKS	EWQIMAWFKNKRYKIKKS	EKQIVYWFHNKREKIKKS	EQQIFRWFANKRSKIKKS	EVQIMRWFNNKRTKIKKS	EQQIKKWFDNKRQKIKKS	EKQIKKWFENKRWKIKKS	EKQIIYWFVNKRVKIKKS	EEQIRGWFSNKRAKIKKS	ELQITYWFQNKRWKIKKS	ERQILIWFQNKRQKIKKS	ELQIHHWFCNKRRKIKKS	ELQIAMWFRNKRRKIKKS	ETQISYWFWNKRRKIKKS	EGQILNWFSNKRRKIKKS	EKQIMTWFQNKRKKIKKS	ERQIADWFSNKRKKIKKS	ELQIANWFHNKRKKIKKS	ESQIANWFSNKRKKIKKS	ERQIFNWFSNKRRKIKKS	ESQIRDWFSNKRRKIKKS	EDQISHWFENKRRKIKKS	ERQISNWFSNKRRKIKKS	EKQISYWFGNKRKKIKKS	ERQIMTWFSNKRKKIKKS	EKQIVCWFQNKRKKIKKS	EVQIMYWFGNKRSKIKKS	EVQIFNWFKNKRFKIKKS	ERQIERWFRNKRWKIKKS	EKQISVWFWNKRYKIKKS	EPQIQTWFKNKRWKIKKS	EVQIHDWFRNKRAKIKKS	EIQINLWFKNKRYKIKKS	EHQINDWFRNKRYKIKKS	ERQIDDWFRNKRYKIKKS	EKQISKWFDNKRAKIKKS	ERQIGKWFNNKRMKIKKS	EGQIAKWFENKRRKIKKS	EKQITKWFDNKRYKIKKS	EMQIRRWFDNKRWKIKKS	EMQIVKWFSNKRYKIKKS	EKQIVKWFENKRRKIKKS	EGQIRVWFANKRYKIKKS	ERQIANWFSNKRAKIKKS	EEQIRVWFSNKRVKIKKS
>9.1063.AAA	>9.356.AAC	>9.1200.AAG	>9.1424.AAT	>9.1022.ACA	>9.2572.ACC	>9.2406.ACG	>9.1786.ACT	>9.946.AGA	>9.1725.AGC	>9.1294.AGG	>9.927.AGT	>9.738.ATA	>9.2145.ATC	>9.1423.ATG	>9.811.ATT	>9.438.CAA	>9.276.CAC	>9.2118.CAG	>9.272.CAT	>9.1170.CCA	>9.1599.CCC	>9.2254.CCG	>9.3063.CCT	>9.1744.CGA	>9.1573.CGC	>9.4091.CGG	>9.5027.CGT	>9.1235.CTA	>9.4860.CTC	>9.2136.CTG	>9.752.CTT	>9.265.GAA	>9.44.GAC	>9.646.GAG	>9.103.GAT	>9.419.GCA	>9.349.GCC	>9.134.GCG	>9.99.GCT	>9.1010.GGA	>9.1001.GGC	>9.979.GGG	>9.313.GGT	>9.136.GTA	>9.460.GTC	>9.1581.GTG	>9.597.GTT	>9.1377.TAA	>9.432.TAC
ERQIKCWFVNKRAKIKKS	ERQIGSWFRNKRHKIKKS	EKQIQQWFWNKRHKIKKS	ERQISTWFANKRFKIKKS	ESQIINWFNNKRRKIKKS	EWQIYAWFKNKRYKIKKS	ERQILSWFQNKRNKIKKS	EAQIMVWFKNKRMKIKKS	ESQIFRWFANKRWKIKKS	EKQIGMWFSNKRTKIKKS	EKQIKKWFENKRRKIKKS	EKQIKKWFENKRYKIKKS	EKQIASWFANKRVKIKKS	ETQISGWFWNKRSKIKKS	EKQITYWFQNKRWKIKKS	EQQIQCWFANKRSKIKKS	ELQIMYWFQNKRAKIKKS	EAQINQWFRNKRRKIKKS	EMQIAWWFWNKRRKIKKS	ELQIAYWFSNKRRKIKKS	EAQISNWFANKRKKIKKS	ESQIHNWFSNKRKKIKKS	EMQITNWFMNKRKKIKKS	ENQIANWFSNKRKKIKKS	EVQIFNWFSNKRRKIKKS	EVQIKDWFSNKRRKIKKS	ESQIRRWFENKRRKIKKS	EMQIGNWFSNKRRKIKKS	ETQISFWFSNKRRKIKKS	ELQIVYWFSNKRKKIKKS	EMQITYWFQNKRKKIKKS	EMQIYWWFSNKRKKIKKS	ERQIFLWFKNKRYKIKKS	ERQIQRWFRNKRFKIKKS	EVQISRWFWNKRYKIKKS	EEQISVWFRNKRYKIKKS	EMQILRWFQNKRAKIKKS	EDQIRIWFKNKRWKIKKS	ERQIMDWFRNKRFKIKKS	ERQICDWFRNKRFKIKKS	EVQIMKWFDNKRQKIKKS	EQQIRGWFRNKREKIKKS	EGQILKWFENKRRKIKKS	ETQISKWFDNKRQKIKKS	EMQINRWFQNKRSKIKKS	ERQIRCWFANKRFKIKKS	ELQISKWFENKRFKIKKS	EVQISRWFGNKRYKIKKS	ERQITIWFRNKRAKIKKS	EQQIRVWFSNKRAKIKKS
>10.1059.AAA	>10.354.AAC	>10.1196.AAG	>10.1397.AAT	>10.1010.ACA	>10.2377.ACC	>10.2382.ACG	>10.1688.ACT	>10.890.AGA	>10.1668.AGC	>10.1264.AGG	>10.891.AGT	>10.721.ATA	>10.2115.ATC	>10.1361.ATG	>10.799.ATT	>10.381.CAA	>10.256.CAC	>10.2109.CAG	>10.252.CAT	>10.1045.CCA	>10.1527.CCC	>10.2208.CCG	>10.2985.CCT	>10.1724.CGA	>10.1570.CGC	>10.4069.CGG	>10.4938.CGT	>10.1125.CTA	>10.3953.CTC	>10.1777.CTG	>10.734.CTT	>10.262.GAA	>10.43.GAC	>10.509.GAG	>10.97.GAT	>10.405.GCA	>10.343.GCC	>10.132.GCG	>10.98.GCT	>10.988.GGA	>10.928.GGC	>10.961.GGG	>10.306.GGT	>10.135.GTA	>10.432.GTC	>10.1578.GTG	>10.586.GTT	>10.1374.TAA	>10.425.TAC
ERQIMTWFANKRFKIKKS	EAQISSWFRNKRFKIKKS	ERQIMQWFWNKRFKIKKS	EKQISGWFSNKRHKIKKS	ETQILNWFNNKRRKIKKS	EVQIKYWFENKRKKIKKS	EKQIMGWFQNKRNKIKKS	ETQILNWFHNKRTKIKKS	EMQINEWFGNKRQKIKKS	EKQIMYWFSNKRVKIKKS	EAQIMKWFENKRWKIKKS	EVQICVWFLNKRSKIKKS	ERQIHYWFVNKRQKIKKS	RGADPLLVGNKRSKIKKS	EAQIEAWFPNKRQKIKKS	ERQIRTWFQNKRSKIKKS	ETQIAYWFQNKRRKIKKS	EGQIAMWFRNKRRKIKKS	ERQISHWFWNKRRKIKKS	EPQITQWFSNKRRKIKKS	ELQICYWFQNKRKKIKKS	EVQIKNWFSNKRKKIKKS	EVQIIYWFENKRRKIKKS	EVQIQNWFSNKRKKIKKS	EGQIHHWFANKRRKIKKS	ESQIRYWFDNKRRKIKKS	EQQISHWFENKRRKIKKS	EVQISYWFSNKRRKIKKS	ELQICYWFANKRKKIKKS	ETQILYWFGNKRKKIKKS	EKQIQMWFENKRRKIKKS	ELQIVYWFGNKRSKIKKS	ERQIFDWFKNKRYKIKKS	EGQIERWFRNKRYKIKKS	EGQISRWFWNKRYKIKKS	ETQILVWFRNKRWKIKKS	EQQIYDWFRNKRQKIKKS	ERQIVQWFKNKRFKIKKS	EHQINDWFRNKRYKIKKS	EKQITDWFRNKRWKIKKS	EEQILKWFDNKRYKIKKS	EQQIIKWFSNKRVKIKKS	EKQIPGWFANKRWKIKKS	ERQISKWFGNKRWKIKKS	EVQIRRWFDNKRAKIKKS	ETQIGKWFRNKRSKIKKS	ERQIAKWFENKRQKIKKS	EGQIMKWFANKRNKIKKS	ERQIVLWFRNKRAKIKKS	EQQIRVWFSNKRVKIKKS
>11.1005.AAA	>11.345.AAC	>11.1158.AAG	>11.1364.AAT	>11.1004.ACA	>11.2304.ACC	>11.2139.ACG	>11.1631.ACT	>11.857.AGA	>11.1543.AGC	>11.1131.AGG	>11.845.AGT	>11.684.ATA	>11.2026.ATC	>11.1350.ATG	>11.786.ATT	>11.331.CAA	>11.221.CAC	>11.2044.CAG	>11.247.CAT	>11.1044.CCA	>11.1524.CCC	>11.2204.CCG	>11.2831.CCT	>11.1711.CGA	>11.1570.CGC	>11.3542.CGG	>11.4807.CGT	>11.1085.CTA	>11.3421.CTC	>11.1696.CTG	>11.708.CTT	>11.248.GAA	>11.43.GAC	>11.498.GAG	>11.84.GAT	>11.401.GCA	>11.339.GCC	>11.122.GCG	>11.97.GCT	>11.979.GGA	>11.781.GGC	>11.951.GGG	>11.303.GGT	>11.133.GTA	>11.426.GTC	>11.1540.GTG	>11.585.GTT	>11.1349.TAA	>11.371.TAC
ETQITTWFANKRHKIKKS	ERQIGVWFRNKRFKIKKS	EKQICQWFWNKRHKIKKS	ERQIKQWFANKRFKIKKS	ESQIKHWFQNKRRKIKKS	ERQITSWFKNKRTKIKKS	EKQIISWFQNKRNKIKKS	EKQIRYWFENKRRKIKKS	EKQIKSWFNNKRWKIKKS	EKQILRWFNNKRVKIKKS	EKQISKWFENKRGKIKKS	EKQIKKWFENKRSKIKKS	EFQIRWWFNNKRRKIKKS	EMQISAWFSNKRGKIKKS	EVQIVYWFQNKRWKIKKS	ERQIHLWFQNKRAKIKKS	EVQIGYWFANKRRKIKKS	ELQIAMWFRNKRRKIKKS	ERQISHWFWNKRRKIKKS	EQQISTWFSNKRRKIKKS	ELQIHYWFCNKRKKIKKS	ERQIGNWFSNKRKKIKKS	EKQIVNWFQNKRKKIKKS	EVQITNWFGNKRKKIKKS	ERQIMHWFQNKRVKIKKS	ELQIRMWFSNKRRKIKKS	EKQITRWFENKRRKIKKS	EGQIANWFSNKRRKIKKS	EKQIMYWFQNKRKKIKKS	ERQIRFWFANKRKKIKKS	ELQIINWFQNKRKKIKKS	ETQISFWFSNKRRKIKKS	EYQIAHWFKNKRFKIKKS	EVQIVRWFRNKRWKIKKS	EKQIATWFWNKRYKIKKS	ERQITHWFRNKRYKIKKS	ERQISKWFQNKRRKIKKS	EAQIRVWFKNKRFKIKKS	EAQICDWFRNKRFKIKKS	EAQIIDWFRNKRYKIKKS	EWQITKWFDNKRYKIKKS	ETQILKWFNNKRQKIKKS	EGQIRKWFENKRRKIKKS	EGQILKWFDNKRQKIKKS	EFQIIKWFQNKRCKIKKS	ESQIGKWFRNKRAKIKKS	ESQISKWFENKRFKIKKS	ERQIKTWFANKRFKIKKS	ERQITIWFRNKRSKIKKS	EEQIRVWFSNKRAKIKKS
>12.959.AAA	>12.342.AAC	>12.1154.AAG	>12.1312.AAT	>12.999.ACA	>12.2163.ACC	>12.2133.ACG	>12.1628.ACT	>12.851.AGA	>12.1479.AGC	>12.1091.AGG	>12.791.AGT	>12.670.ATA	>12.1891.ATC	>12.1349.ATG	>12.741.ATT	>12.320.CAA	>12.218.CAC	>12.2016.CAG	>12.246.CAT	>12.953.CCA	>12.1512.CCC	>12.2095.CCG	>12.2714.CCT	>12.1684.CGA	>12.1493.CGC	>12.2825.CGG	>12.4363.CGT	>12.1068.CTA	>12.3231.CTC	>12.1625.CTG	>12.695.CTT	>12.248.GAA	>12.42.GAC	>12.498.GAG	>12.83.GAT	>12.393.GCA	>12.335.GCC	>12.116.GCG	>12.97.GCT	>12.969.GGA	>12.657.GGC	>12.937.GGG	>12.293.GGT	>12.132.GTA	>12.419.GTC	>12.1401.GTG	>12.566.GTT	>12.1322.TAA	>12.344.TAC
ERQIYYWFVNKRWKIKKS	EEQISSWFRNKRFKIKKS	ERQITQWFWNKRFKIKKS	EKQIGAWFANKRHKIKKS	ESQISNWFNNKRRKIKKS	ELQISYWFHNKRVKIKKS	ELQILWWFANKRRKIKKS	ESQILMWFSNKRRKIKKS	EKQIVYWFNNKRVKIKKS	EQQILRWFNNKRVKIKKS	EEQIGKWFENKRYKIKKS	EKQIKKWFENKRSKIKKS	ERQIMSWFANKRAKIKKS	EEQIISWFTNKRCKIKKS	ERQIYYWFQNKRWKIKKS	ERQIVVWFQNKRMKIKKS	ETQILHWFQNKRRKIKKS	EPQITMWFRNKRRKIKKS	EQQISNWFWNKRRKIKKS	EPQITQWFANKRRKIKKS	EKQIMQWFQNKRKKIKKS	ERQIANWFSNKRKKIKKS	EKQIIYWFENKRKKIKKS	EQQITDWFGNKRKKIKKS	EAQIFNWFSNKRRKIKKS	EEQIRNWFSNKRRKIKKS	ELQIGRWFENKRRKIKKS	EAQISNWFNNKRRKIKKS	EMQIIYWFANKRRKIKKS	EHQISFWFSNKRKKIKKS	ELQIIYWFQNKRKKIKKS	EKQIMNWFGNKRNKIKKS	EQQIFTWFKNKRYKIKKS	EQQIERWFRNKRYKIKKS	EKQITRWFWNKRYKIKKS	ELQILHWFRNKRYKIKKS	EKQILRWFQNKRQKIKKS	EQQIYTWFKNKRFKIKKS	EKQIRGWFKNKRWKIKKS	ERQILDWFRNKRYKIKKS	EHQIVKWFDNKRQKIKKS	EAQIVKWFNNKRFKIKKS	ENQIAKWFENKRRKIKKS	EGQIVKWFSNKRVKIKKS	ERQIARWFQNKRTKIKKS	EQQILRWFGNKRFKIKKS	ERQICKWFENKRWKIKKS	EVQITSWFKNKRWKIKKS	ERQICVWFRNKRAKIKKS	EEQIRVWFSNKRVKIKKS
>13.937.AAA	>13.330.AAC	>13.1088.AAG	>13.1222.AAT	>13.986.ACA	>13.2081.ACC	>13.2104.ACG	>13.1520.ACT	>13.845.AGA	>13.1347.AGC	>13.1075.AGG	>13.789.AGT	>13.648.ATA	>13.1801.ATC	>13.1317.ATG	>13.737.ATT	>13.310.CAA	>13.204.CAC	>13.1988.CAG	>13.244.CAT	>13.950.CCA	>13.1454.CCC	>13.2020.CCG	>13.2593.CCT	>13.1651.CGA	>13.1472.CGC	>13.2787.CGG	>13.4172.CGT	>13.1060.CTA	>13.3088.CTC	>13.1558.CTG	>13.692.CTT	>13.245.GAA	>13.42.GAC	>13.492.GAG	>13.83.GAT	>13.328.GCA	>13.328.GCC	>13.110.GCG	>13.88.GCT	>13.935.GGA	>13.652.GGC	>13.926.GGG	>13.277.GGT	>13.131.GTA	>13.376.GTC	>13.1398.GTG	>13.552.GTT	>13.1288.TAA	>13.335.TAC
ERQIHYWFVNKRHKIKKS	EKQIISWFRNKRFKIKKS	ERQIGQWFWNKRHKIKKS	ERQIMAWFSNKRFKIKKS	EVQIANWFNNKRRKIKKS	EKQIAAWFANKRSKIKKS	EKQIVYWFDNKRRKIKKS	ERQISSWFHNKRMKIKKS	EKQIIYWFNNKRTKIKKS	EKQIRCWFRNKRVKIKKS	EMQIAKWFENKRSKIKKS	ERQIHKWFENKRFKIKKS	ERQIMCWFANKRVKIKKS	ETQIRMWFNNKRFKIKKS	EKQIIFWFQNKRTKIKKS	EMQIRTWFQNKRAKIKKS	EMQIFHWFANKRRKIKKS	ELQIVYWFSNKRRKIKKS	EKQIGGWFSNKRRKIKKS	EVQIANWFSNKRRKIKKS	ERQIMFWFQNKRKKIKKS	ERQIADWFHNKRKKIKKS	ERQIVYWFENKRRKIKKS	EVQIVNWFSNKRKKIKKS	ESQIAWWFGNKRAKIKKS	EKQITMWFNNKRRKIKKS	ERQICHWFENKRRKIKKS	EKQITYWFSNKRMKIKKS	ELQISYWFANKRRKIKKS	ENQIRYWFGNKRKKIKKS	EKQINYWFWNKRKKIKKS	ESQIMYWFGNKRAKIKKS	EYQIIPWFVNKRVKIKKS	EGQISRWFRNKRWKIKKS	EHQISVWFWNKRYKIKKS	ETQIARWFLNKRYKIKKS	EKQITKWFQNKRIKIKKS	EAQIRIWFKNKRWKIKKS	EHQINDWFRNKRAKIKKS	ERQIRDWFRNKRFKIKKS	EKQILKWFDNKRCKIKKS	EPQISKWFNNKRQKIKKS	EGQISKWFENKRRKIKKS	EKQIVKWFDNKRRKIKKS	EAQIGKWFQNKRMKIKKS	EYQIQRWFGNKRAKIKKS	EGQIARWFENKRYKIKKS	ERQISRWFGNKRFKIKKS	ERQITLWFRNKRAKIKKS	EEQIRIWFSNKRAKIKKS
>14.925.AAA	>14.319.AAC	>14.1078.AAG	>14.1222.AAT	>14.946.ACA	>14.1791.ACC	>14.2046.ACG	>14.1513.ACT	>14.834.AGA	>14.1325.AGC	>14.1035.AGG	>14.751.AGT	>14.645.ATA	>14.1770.ATC	>14.1203.ATG	>14.720.ATT	>14.291.CAA	>14.198.CAC	>14.1973.CAG	>14.241.CAT	>14.944.CCA	>14.1448.CCC	>14.1854.CCG	>14.2519.CCT	>14.1452.CGA	>14.1452.CGC	>14.2708.CGG	>14.3868.CGT	>14.1042.CTA	>14.2839.CTC	>14.1425.CTG	>14.690.CTT	>14.244.GAA	>14.42.GAC	>14.484.GAG	>14.82.GAT	>14.328.GCA	>14.320.GCC	>14.106.GCG	>14.84.GCT	>14.924.GGA	>14.631.GGC	>14.914.GGG	>14.265.GGT	>14.128.GTA	>14.358.GTC	>14.1357.GTG	>14.535.GTT	>14.1233.TAA	>14.330.TAC
ERQIHYWFVNKRYKIKKS	EKQILSWFRNKRFKIKKS	EKQIVQWFWNKRHKIKKS	ERQISNWFSNKRFKIKKS	EQQIYWWFVNKRRKIKKS	ELQIDMWFLNKRSKIKKS	ELQIWTWFRNKRTKIKKS	ERQIPFWFGNKRLKIKKS	EGQIFRWFANKRHKIKKS	EVQISRWFSNKRVKIKKS	EKQISKWFENKRRKIKKS	EMQINKWFENKRWKIKKS	ERQIASWFANKRTKIKKS	ETQIRMWFNNNRFKIKKS	EVQISIWFCNKRAKIKKS	ERQIGLWFQNKRAKIKKS	EVQIFYWFTNKRRKIKKS	ELQIAMWFRNKRRKIKKS	EMQIAHWFWNKRRKIKKS	EQQIGNWFSNKRRKIKKS	ERQIGDWFANKRKKIKKS	ELQIMMWFSNKRKKIKKS	EKQISNWFQNKRKKIKKS	ESQIVNWFHNKRKKIKKS	ERQIFYWFSNKRQKIKKS	ESQIRDWFSNKRRKIKKS	EKQIIYWFENKRRKIKKS	EAQISMWFNNKRRKIKKS	ETQISYWFANKRKKIKKS	ERQISYWFGNKRKKIKKS	EVQIQNWFQNKRKKIKKS	EKQIAHWFGNKRSKIKKS	EKQIDRWFQNKRHKIKKS	EAQIIRWFRNKRWKIKKS	EVQIQRWFWNKRYKIKKS	EIQIEKWFSNKRYKIKKS	EPQILKWFQNKRRKIKKS	ECQIRVWFKNKRWKIKKS	ESQIGDWFRNKRYKIKKS	ELQILGWFRNKRYKIKKS	ERQISKWFDNKRSKIKKS	EHQIMKWFNNKRLKIKKS	EQQINKWFENKRRKIKKS	EKQILKWFDNKRYKIKKS	EGQISKWFANKRCKIKKS	ECQINKWFRNKRWKIKKS	ESQIMRWFENKRFKIKKS	EAQIMKWFANKRWKIKKS	ERQIATWFVNKRVKIKKS	EEQIRVWFSNKRVKIKKS
>15.899.AAA	>15.291.AAC	>15.1019.AAG	>15.1067.AAT	>15.939.ACA	>15.1724.ACC	>15.1985.ACG	>15.1475.ACT	>15.809.AGA	>15.1308.AGC	>15.1034.AGG	>15.740.AGT	>15.642.ATA	>15.1702.ATC	>15.1127.ATG	>15.664.ATT	>15.288.CAA	>15.195.CAC	>15.1925.CAG	>15.240.CAT	>15.919.CCA	>15.1419.CCC	>15.1774.CCG	>15.2309.CCT	>15.1450.CGA	>15.1409.CGC	>15.2704.CGG	>15.3630.CGT	>15.1028.CTA	>15.2753.CTC	>15.1299.CTG	>15.690.CTT	>15.240.GAA	>15.42.GAC	>15.464.GAG	>15.81.GAT	>15.321.GCA	>15.297.GCC	>15.104.GCG	>15.81.GCT	>15.895.GGA	>15.617.GGC	>15.910.GGG	>15.263.GGT	>15.124.GTA	>15.317.GTC	>15.1256.GTG	>15.532.GTT	>15.1123.TAA	>15.326.TAC
EPQIAAWFANKRFKIKKS	EGQIAQWFRNKRFKIKKS	EKQINQWFWNKRFKIKKS	EKQIVMWFSNKRFKIKKS	EHQISWWFWNKRRKIKKS	ERQISTWFQNKRKKIKKS	ERQITHWFENKRRKIKKS	ELQIPRWFHNKRAKIKKS	EAQIFRWFANKRWKIKKS	EMQIRYWFSNKRSKIKKS	EQQIYKWFENKRVKIKKS	EFQIRKWFENKRYKIKKS	EKQIMYWFNNKRWKIKKS	EWQIWLWFGNKRVKIKKS	EVQILGWF_NKRVKIKKS	ERQIVVWFQNKRSKIKKS	EVQIMYWFQNKRRKIKKS	EEQIRQWFSNKRRKIKKS	EPQISYWFWNKRRKIKKS	EKQIACWFSNKRRKIKKS	ELQIHNWFCNKRKKIKKS	ERQITDWFSNKRKKIKKS	EKQIIDWFQNKRKKIKKS	EVQISNWFSNKRKKIKKS	EVQIHNWFSNKRRKIKKS	ETQIVCWFSNKRRKIKKS	EKQITNWFENKRRKIKKS	EKQIGNWFSNKRRKIKKS	EVQIAYWFSNKRKKIKKS	ERQITMWFANKRKKIKKS	EVQIMNWFMNKRKKIKKS	EKQIAFWFGNKRSKIKKS	EHQIFHWFKNKRSKIKKS	EEQINRWFRNKRWKIKKS	ERQIAVWFWNKRYKIKKS	ERQILSWFRNKRYKIKKS	ESQIMKWFANKRRKIKKS	ETQIMLWFKNKRYKIKKS	EKQIADWFRNKRFKIKKS	EMQIMDWFRNKRYKIKKS	ERQINKWFDNKRQKIKKS	EVQIQKWFNNKRYKIKKS	EVQISKWFENKRAKIKKS	EQQIAKWFDNKRFKIKKS	ENQILRWFQNKRGKIKKS	EKQIQKWFRNKRFKIKKS	EGQIVRWFENKRYKIKKS	ESQIRTWFANKRYKIKKS	ERQILTWFSNKRAKIKKS	EEQIRVWFSNKRAKIKKS
>16.829.AAA	>16.285.AAC	>16.946.AAG	>16.1036.AAT	>16.920.ACA	>16.1713.ACC	>16.1852.ACG	>16.1464.ACT	>16.795.AGA	>16.1303.AGC	>16.1005.AGG	>16.729.AGT	>16.638.ATA	>16.1701.ATC	>16.1118.ATG	>16.645.ATT	>16.282.CAA	>16.192.CAC	>16.1911.CAG	>16.238.CAT	>16.918.CCA	>16.1395.CCC	>16.1658.CCG	>16.2269.CCT	>16.1387.CGA	>16.1368.CGC	>16.2421.CGG	>16.3468.CGT	>16.1013.CTA	>16.2462.CTC	>16.1227.CTG	>16.676.CTT	>16.228.GAA	>16.41.GAC	>16.459.GAG	>16.80.GAT	>16.320.GCA	>16.254.GCC	>16.102.GCG	>16.80.GCT	>16.895.GGA	>16.598.GGC	>16.876.GGG	>16.256.GGT	>16.118.GTA	>16.310.GTC	>16.1182.GTG	>16.530.GTT	>16.1081.TAA	>16.275.TAC
ERQIKFWFVNKRAKIKKS	ESQIGSWFRNKRHKIKKS	EKQITQWFWNKRFKIKKS	ERQISMWFTNKRFKIKKS	EHQISNWFNNKRRKIKKS	ERQISGWFHNKRTKIKKS	ELQIEFWFMNKRMKIKKS	SCRSRAGSGTSGGRIKKS	ELQISRWFWNKRYKIKKS	ERQIFYWFRNKRVKIKKS	ERQIYKWFENKRWKIKKS	ENQIRKWFENKRFKIKKS	ERQIMAWFANKRSKIKKS	EHQILPWFRNKRLKIKKS	ERQIDDWFHNKRGKIKKS	EKQIKVWFQNKRNKIKKS	ELQIHYWFVNKRRKIKKS	ELQIAMWFRNKRRKIKKS	ELQISWWFWNKRRKIKKS	EQQILQWFSNKRRKIKKS	ERQIVTWFQNKRKKIKKS	ERQIADWFSNKRKKIKKS	ERQIMDWFQNKRKKIKKS	ERQIMQWFANKRKKIKKS	ERQIHYWFSNKRVKIKKS	EKQIMNWFSNKRRKIKKS	EVQIGRWFENKRRKIKKS	EMQIYNWFSNKRRKIKKS	EEQITYWFANKRRKIKKS	ERQIMDWFRNKRKKIKKS	ETQIGNWFQNKRKKIKKS	EKQISYWFSNKRRKIKKS	EGQIVRWFQNKRWKIKKS	EEQITRWFRNKRWKIKKS	EIQIARWFWNKRWKIKKS	EMQISVWFRNKRYKIKKS	ENQILRWFQNKRRKIKKS	EKQIWIWFKNKRYKIKKS	ERQIWSWFANKRAKIKKS	EAQIMDWFRNKRYKIKKS	EQQITKWFDNKRQKIKKS	EQQIAKWFNNKRLKIKKS	ERQISKWFENKRRKIKKS	EMQITKWFDNKRQKIKKS	EVQISRWFQNKRQKIKKS	EPQIIRWFGNKRYKIKKS	ELQIVRWFENKRYKIKKS	ERQINQWFGNKRYKIKKS	ERQICLWFRNKRAKIKKS	EGQIRIWFSNKRAKIKKS
>17.803.AAA	>17.282.AAC	>17.877.AAG	>17.1024.AAT	>17.912.ACA	>17.1663.ACC	>17.1763.ACG	>17.1458.ACT	>17.750.AGA	>17.1288.AGC	>17.996.AGG	>17.707.AGT	>17.627.ATA	>17.1618.ATC	>17.1100.ATG	>17.637.ATT	>17.281.CAA	>17.190.CAC	>17.1866.CAG	>17.232.CAT	>17.911.CCA	>17.1357.CCC	>17.1654.CCG	>17.2098.CCT	>17.1350.CGA	>17.1323.CGC	>17.2312.CGG	>17.3335.CGT	>17.1002.CTA	>17.2455.CTC	>17.1046.CTG	>17.621.CTT	>17.205.GAA	>17.41.GAC	>17.456.GAG	>17.73.GAT	>17.319.GCA	>17.251.GCC	>17.102.GCG	>17.79.GCT	>17.852.GGA	>17.593.GGC	>17.844.GGG	>17.255.GGT	>17.117.GTA	>17.307.GTC	>17.1012.GTG	>17.493.GTT	>17.1071.TAA	>17.273.TAC
ERQINTWFANKRFKIKKS	ERQIATWFRNKRFKIKKS	EGQIKQWFWNKRHKIKKS	ERQIHYWFVNKRDKIKKS	ELQILNWFNNKRRKIKKS	EVQIRRWFNNKRVKIKKS	ETQIRYWFDNKRRKIKKS	EYQIRSWFGNKRTKIKKS	EAQIGGWFRNKRYKIKKS	EKQISRWFNNKRVKIKKS	EKQIRKWFENKRGKIKKS	EPQIIKWFENKRYKIKKS	EFQIRVWFNNKRAKIKKS	ERQIVQWFANKRFKIKKS	ETQISSWFGNKRSKIKKS	ERQIAVWFQNKRSKIKKS	ELQIANWFANKRRKIKKS	EMQIMMWFRNKRRKIKKS	EKQIIYWFWNKRRKIKKS	ESQICNWFSNKRRKIKKS	EDQISNWFANKRKKIKKS	ELQISYWFSNKRKKIKKS	ETQIRDWFQNKRKKIKKS	ESQISNWFSNKRKKIKKS	ERQIGYWFANKRVKIKKS	EVQIGNWFSNKRRKIKKS	ESQITRWFENKRRKIKKS	ESQILNWFSNKRRKIKKS	ESQISYWFSNKRRKIKKS	EMQIYYWFSNKRKKIKKS	ETQIVNWFQNKRKKIKKS	ERQIRNWFSNKRKKIKKS	ECQINRWFQNKRWKIKKS	EGQIERWFRNKRWKIKKS	ELQIARWFWNKRYKIKKS	EEQIAVWFRNKRYKIKKS	ERQILRWFQNKRAKIKKS	EKQIYAWFKNKRYKIKKS	EKQIEDWFRNKRFKIKKS	EYQIQDWFRNKRYKIKKS	ERQIAKWFDNKRMKIKKS	EQQIIKWFSNKRVKIKKS	EAQINKWFENKRRKIKKS	EGQILKWFDNKRAKIKKS	ELQIRRWFENKRWKIKKS	ELQIQRWFGNKRAKIKKS	ERQITKWFENKRMKIKKS	ESQIAHWFANKRYKIKKS	ERQICLWFRNKRAKIKKS	EEQIRVWFSNKRAKIKKS
>18.793.AAA	>18.280.AAC	>18.875.AAG	>18.992.AAT	>18.876.ACA	>18.1620.ACC	>18.1720.ACG	>18.1367.ACT	>18.747.AGA	>18.1263.AGC	>18.990.AGG	>18.703.AGT	>18.618.ATA	>18.1575.ATC	>18.998.ATG	>18.628.ATT	>18.280.CAA	>18.188.CAC	>18.1812.CAG	>18.232.CAT	>18.884.CCA	>18.1272.CCC	>18.1593.CCG	>18.2094.CCT	>18.1348.CGA	>18.1249.CGC	>18.2291.CGG	>18.3171.CGT	>18.997.CTA	>18.2434.CTC	>18.972.CTG	>18.614.CTT	>18.204.GAA	>18.41.GAC	>18.454.GAG	>18.70.GAT	>18.300.GCA	>18.251.GCC	>18.101.GCG	>18.78.GCT	>18.831.GGA	>18.586.GGC	>18.827.GGG	>18.252.GGT	>18.116.GTA	>18.302.GTC	>18.931.GTG	>18.489.GTT	>18.1009.TAA	>18.264.TAC
ELQISSWFANKRHKIKKS	ESQISSWFRNKRHKIKKS	ERQITQWFWNKRHKIKKS	EKQIASWFSNKRFKIKKS	EKQIADWFNNKRRKIKKS	EKQIAYWFHNKRVKIKKS	EVQIRWWFENKRRKIKKS	ENQIAPWFSNKRSKIKKS	EKQIKSWFNNKRWKIKKS	EQQIARWFNNKRVKIKKS	EKQISKWFENKRRKIKKS	EKQIRKWFENKRFKIKKS	EKQISAWFANKRVKIKKS	ECQIRTWFKNKRLKIKKS	ELQITYWFQNKRWKIKKS	EVQIVVWFQNKRAKIKKS	EKQIMQWFQNKRRKIKKS	EQQIRQWFSNKRRKIKKS	EQQINWWFWNKRRKIKKS	EVQIANWFSNKRRKIKKS	ELQITMWFQNKRKKIKKS	ELQIVYWFSNKRKKIKKS	EKQIMYWFENKRKKIKKS	EVQITNWFGNKRKKIKKS	ERQISYWFGNKRTKIKKS	ENQIACWFSNKRRKIKKS	EGQIVRWFENKRRKIKKS	EVQIGYWFNNKRRKIKKS	ERQIVYWFGNKRKKIKKS	EQQINNWFRNKRKKIKKS	ERQIMMWFQNKRKKIKKS	EQQITYWFGNKRSKIKKS	EMQIFTWFKNKRYKIKKS	EVQIRRWFRNKRWKIKKS	EGQIMRWFWNKRYKIKKS	EVQICRWFLNKRYKIKKS	ECQIGKWFSNKRMKIKKS	EEQIRLWFKNKRFKIKKS	EVQITKWFKNKRWKIKKS	EEQIMAWFKNKRYKIKKS	EEQIMKWFDNKRQKIKKS	EGQIVKWFNNKRFKIKKS	ETQIAKWFENKRRKIKKS	ERQIAKWFDNKRQKIKKS	ESQITRWFQNKRVKIKKS	EMQIGKWFRNKRMKIKKS	EMQIGKWFENKRWKIKKS	ERQIVRWFANKRFKIKKS	EYQITNWFNNKRAKIKKS	EEQIRVWFSNKRAKIKKS
>19.789.AAA	>19.270.AAC	>19.869.AAG	>19.981.AAT	>19.875.ACA	>19.1527.ACC	>19.1645.ACG	>19.1342.ACT	>19.739.AGA	>19.1254.AGC	>19.929.AGG	>19.697.AGT	>19.598.ATA	>19.1542.ATC	>19.993.ATG	>19.582.ATT	>19.260.CAA	>19.185.CAC	>19.1782.CAG	>19.229.CAT	>19.876.CCA	>19.1271.CCC	>19.1574.CCG	>19.1972.CCT	>19.1342.CGA	>19.1238.CGC	>19.2210.CGG	>19.3113.CGT	>19.978.CTA	>19.2310.CTC	>19.840.CTG	>19.611.CTT	>19.201.GAA	>19.41.GAC	>19.433.GAG	>19.69.GAT	>19.293.GCA	>19.243.GCC	>19.100.GCG	>19.78.GCT	>19.813.GGA	>19.555.GGC	>19.814.GGG	>19.245.GGT	>19.116.GTA	>19.297.GTC	>19.878.GTG	>19.488.GTT	>19.873.TAA	>19.263.TAC
EKQIMYWFVNKRHKIKKS	EKQITAWFRNKRFKIKKS	EKQISQWFWNKRFKIKKS	ERQILQWFANKRFKIKKS	ESQIRNWFNNKRRKIKKS	EKQIFGWFLNKRLKIKKS	ERQIKHWFENKRRKIKKS	ESQIRYWFENKRRKIKKS	ESQIRSWFNNKRWKIKKS	EPQILGWFPNKRMKIKKS	EKQIGKWFENKRSKIKKS	EVQIKKWFENKRFKIKKS	ERQIVYWFQNKRQKIKKS	ETQIRMWFANKRWKIKKS	ECQIVYWFQNKRHKIKKS	ERQIIVWFQNKRQKIKKS	EGQIHNWFANKRRKIKKS	EMQIAMWFRNKRRKIKKS	ELQISRWFWNKRRKIKKS	EAQIASWFSNKRRKIKKS	EKQIMFWFQNKRKKIKKS	ERQISDWFSNKRKKIKKS	EKQIRDWFQNKRKKIKKS	EMQITNWFGNKRKKIKKS	EKQILYWFANKRAKIKKS	ELQIRMWFSNKRRKIKKS	EQQIARWFENKRRKIKKS	ERQISMWFGNKRMKIKKS	EKQILNWFANKRKKIKKS	EQQIRNWFTNKRKKIKKS	ERQIICWFENKRKKIKKS	EMQIVNWFSNKRRKIKKS	EVQIMLWFKNKRYKIKKS	EGQIQRWFRNKRWKIKKS	EGQIARWFWNKRYKIKKS	ERQISVWFRNKRWKIKKS	EAQILKWFQNKRRKIKKS	EQQIYYWFKNKRFKIKKS	ELQITDWFRNKRYKIKKS	ERQIWDWFRNKRYKIKKS	EGQITKWFDNKRQKIKKS	EKQILKWFNNKRCKIKKS	EQQILKWFENKRRKIKKS	EKQIAKWFDNKRLKIKKS	ENQIVRWFQNKRAKIKKS	EVQIRTWFRNKRVKIKKS	EGQIARWFENKRYKIKKS	ELQIARWFGNKRFKIKKS	ERQITIWFRNKRAKIKKS	EEQIRVWFSNKRSKIKKS
>20.705.AAA	>20.266.AAC	>20.868.AAG	>20.962.AAT	>20.849.ACA	>20.1450.ACC	>20.1592.ACG	>20.1304.ACT	>20.685.AGA	>20.1166.AGC	>20.910.AGG	>20.695.AGT	>20.570.ATA	>20.1485.ATC	>20.980.ATG	>20.581.ATT	>20.260.CAA	>20.178.CAC	>20.1682.CAG	>20.228.CAT	>20.833.CCA	>20.1124.CCC	>20.1570.CCG	>20.1912.CCT	>20.1307.CGA	>20.1224.CGC	>20.2149.CGG	>20.3094.CGT	>20.964.CTA	>20.2186.CTC	>20.830.CTG	>20.604.CTT	>20.195.GAA	>20.41.GAC	>20.425.GAG	>20.69.GAT	>20.286.GCA	>20.214.GCC	>20.100.GCG	>20.74.GCT	>20.762.GGA	>20.530.GGC	>20.814.GGG	>20.243.GGT	>20.115.GTA	>20.296.GTC	>20.867.GTG	>20.445.GTT	>20.842.TAA	>20.251.TAC
ERQIYYWFVNKRHKIKKS	EGQINCWFRNKRFKIKKS	ERQIVQWFWNKRHKIKKS	EWQIYYWFKNKRYKIKKS	EMQISGWFRNKRRKIKKS	ERQISNWFHNKRTKIKKS	ERQIVHWFENKRRKIKKS	ERQITSWFHNKRMKIKKS	ESQIFRWFANKRHKIKKS	ERQIMRWFNNKRVKIKKS	EKQITKWFENKRSKIKKS	EHQIKKWFENKRWKIKKS	EKQIMVWFANKRAKIKKS	ECQIMDWFRNKRSKIKKS	ERQITFWFQNKRQKIKKS	ELQILSWFSNKRNKIKKS	EVQIMYWFQNKRRKIKKS	EVQISQWFRNKRRKIKKS	ECQISWWFWNKRRKIKKS	EYQILQWFSNKRRKIKKS	ESQIANWFANKRKKIKKS	ERQIRDWFSNKRKKIKKS	ERQIVYWFENKRRKIKKS	ETQIGNWFSNKRKKIKKS	EKQIRYWFGNKRSKIKKS	ELQIMYWFSNKRRKIKKS	EKQISRWFENKRRKIKKS	EVQIAYWFSNKRRKIKKS	ETQIHYWFCNKRRKIKKS	EMQITNWFKNKRKKIKKS	EKQITDWFQNKRNKIKKS	EVQIHNWFSNKRKKIKKS	EEQINRWFQNKRWKIKKS	EEQITRWFRNKRFKIKKS	EKQISVWFWNKRYKIKKS	ELQIGVWFRNKRYKIKKS	ERQIGKWFQNKRRKIKKS	EKQISQWFKNKRWKIKKS	ELQILDWFRNKRYKIKKS	EHQIRIWFKNKRWKIKKS	EWQISKWFDNKRQKIKKS	EVQITKWFSNKRQKIKKS	EKQINKWFENKRRKIKKS	EVQIVKWFSNKRQKIKKS	EAQIARWFANKRMKIKKS	EEQIRRWFGNKRAKIKKS	EHQILIWFQNKRYKIKKS	EVQIIKWFNNKRDKIKKS	ERQIRSWFSNKRSKIKKS	EGQIRVWFSNKRAKIKKS
>21.705.AAA	>21.258.AAC	>21.841.AAG	>21.954.AAT	>21.840.ACA	>21.1430.ACC	>21.1591.ACG	>21.1261.ACT	>21.668.AGA	>21.1077.AGC	>21.895.AGG	>21.694.AGT	>21.561.ATA	>21.1042.ATC	>21.967.ATG	>21.571.ATT	>21.256.CAA	>21.177.CAC	>21.1620.CAG	>21.226.CAT	>21.830.CCA	>21.1104.CCC	>21.1439.CCG	>21.1748.CCT	>21.1270.CGA	>21.1130.CGC	>21.2079.CGG	>21.2773.CGT	>21.956.CTA	>21.1963.CTC	>21.827.CTG	>21.598.CTT	>21.190.GAA	>21.41.GAC	>21.412.GAG	>21.68.GAT	>21.276.GCA	>21.214.GCC	>21.98.GCG	>21.73.GCT	>21.726.GGA	>21.521.GGC	>21.808.GGG	>21.240.GGT	>21.114.GTA	>21.274.GTC	>21.857.GTG	>21.421.GTT	>21.824.TAA	>21.248.TAC
EKQIMTWFANKRFKIKKS	ERQITDWFRNKRHKIKKS	ERQIAQWFWNKRFKIKKS	EKQITSWFSNKRFKIKKS	EKQIGNWFHNKRTKIKKS	EEQICSWFINKRSKIKKS	EKQITNWFENKRRKIKKS	ERQIKYWFENKRKKIKKS	EGQIFRWFANKRWKIKKS	ETQISRWFNNKRVKIKKS	ERQIGKWFENKRRKIKKS	EGQILYWFSNKRQKIKKS	EHQIMVWFYNKRIKIKKS	EVQIRMWFANKRFKIKKS	EKQISTWFQNKRVKIKKS	ERQIYVWFANKRIKIKKS	ELQIMWWFQNKRRKIKKS	EKQIGNWFRNKRRKIKKS	ESQIKGWFPNKRTKIKKS	ELQIANWFSNKRRKIKKS	EGQIHNWFANKRKKIKKS	EKQINRWFENKRRKIKKS	ELQIVYWFENKRKKIKKS	ENQIMNWFSNKRKKIKKS	ERQIFNWFANKRRKIKKS	ERQIVTWFSNKRRKIKKS	ETQISHWFENKRRKIKKS	EMQISNWFSNKRRKIKKS	ESQISYWFSNKRRKIKKS	EKQIVNWFSNKRKKIKKS	ERQIVNWFQNKRKKIKKS	EVQIIYWFGNKRKKIKKS	ELQIFHWFKNKRSKIKKS	EVQITRWFRNKRFKIKKS	EQQIMQWFWNKRWKIKKS	EEQIARWFLNKRYKIKKS	ERQISKWFQNKRRKIKKS	EEQIRLWFKNKRFKIKKS	ERQIQDWFRNKRYKIKKS	EKQITMWFKNKRYKIKKS	EGQIGKWFDNKRQKIKKS	EQQIGKWFNNKRAKIKKS	EEQIRKWFENKRWKIKKS	ECQISKWFDNKRQKIKKS	ESQILRWFGNKRAKIKKS	EIQIAKWFRNKRHKIKKS	ECQIGRWFENKRYKIKKS	EIQIMRWFGNKRAKIKKS	ERQITLWFRNKRAKIKKS	EEQIRVWFSNKRVKIKKS
>22.674.AAA	>22.253.AAC	>22.822.AAG	>22.919.AAT	>22.826.ACA	>22.1397.ACC	>22.1422.ACG	>22.1261.ACT	>22.662.AGA	>22.1063.AGC	>22.890.AGG	>22.683.AGT	>22.552.ATA	>22.1023.ATC	>22.960.ATG	>22.566.ATT	>22.254.CAA	>22.176.CAC	>22.1596.CAG	>22.223.CAT	>22.814.CCA	>22.1050.CCC	>22.1435.CCG	>22.1658.CCT	>22.1267.CGA	>22.1130.CGC	>22.2002.CGG	>22.2702.CGT	>22.937.CTA	>22.1923.CTC	>22.810.CTG	>22.581.CTT	>22.189.GAA	>22.41.GAC	>22.400.GAG	>22.67.GAT	>22.250.GCA	>22.203.GCC	>22.98.GCG	>22.72.GCT	>22.706.GGA	>22.506.GGC	>22.771.GGG	>22.238.GGT	>22.111.GTA	>22.270.GTC	>22.739.GTG	>22.392.GTT	>22.812.TAA	>22.235.TAC
EKQIAYWFVNKRHKIKKS	EAQISGWFRNKRFKIKKS	EKQIVQWFWNKRHKIKKS	ERQITTWFSNKRFKIKKS	ELQIANWFNNKRRKIKKS	EVQIQNWFHNKRTKIKKS	ESQIRNWFDNKRRKIKKS	EFQIFHWFDNKRLKIKKS	ERQIASWFNNKRYKIKKS	ERQIVRWFNNKRVKIKKS	EKQISKWFENKRGKIKKS	EQQIKKWFENKRFKIKKS	ERQILYWFSNKRHKIKKS	ELQIDVWFSNKRRKIKKS	EKQIVYWFQNKRVKIKKS	ERQIKVWFQNKRAKIKKS	EMQIHYWFSNKRRKIKKS	ELQIGMWFRNKRRKIKKS	EKQISCWFWNKRRKIKKS	ESQINNWFSNKRRKIKKS	EKQITMWFQNKRKKIKKS	EAQIANWFSNKRKKIKKS	EKQISTWFENKRKKIKKS	ETQIANWFGNKRKKIKKS	ETQIFYWFANKRAKIKKS	EKQIHHWFSNKRRKIKKS	ETQISHWFENKRRKIKKS	ERQISNWFNNKRKKIKKS	ERQIAFWFSNKRKKIKKS	EHQIGNWFSNKRKKIKKS	EVQISMWFQNKRKKIKKS	EKQIMYWFSNKRNKIKKS	EQQIERWFQNKRWKIKKS	EGQIARWFRNKRFKIKKS	ESQIKQWFWNKRYKIKKS	EHQIDKWFVNKRYKIKKS	EVQIFHWFRNKRAKIKKS	EHQIYSWFKNKRYKIKKS	ELQIMDWFRNKRYKIKKS	EQQIIDWFRNKRYKIKKS	ELQIFRWFANKRWKIKKS	EVQITKWFNNKRMKIKKS	EMQIMKWFENKRWKIKKS	ERQIVKWFSNKRCKIKKS	ETQIRRWFDNKRAKIKKS	ERQISKWFRNKRFKIKKS	EGQIGKWFENKRFKIKKS	EGQIQRWFGNKRFKIKKS	EKQIVVWFRNKRAKIKKS	ESQIRVWFSNKRAKIKKS
>23.653.AAA	>23.252.AAC	>23.818.AAG	>23.912.AAT	>23.822.ACA	>23.1295.ACC	>23.1302.ACG	>23.1223.ACT	>23.656.AGA	>23.1054.AGC	>23.878.AGG	>23.677.AGT	>23.541.ATA	>23.998.ATC	>23.960.ATG	>23.566.ATT	>23.251.CAA	>23.175.CAC	>23.1595.CAG	>23.223.CAT	>23.727.CCA	>23.1033.CCC	>23.1302.CCG	>23.1622.CCT	>23.1261.CGA	>23.1085.CGC	>23.1854.CGG	>23.2674.CGT	>23.885.CTA	>23.1786.CTC	>23.771.CTG	>23.564.CTT	>23.188.GAA	>23.40.GAC	>23.394.GAG	>23.67.GAT	>23.248.GCA	>23.197.GCC	>23.97.GCG	>23.71.GCT	>23.660.GGA	>23.444.GGC	>23.689.GGG	>23.236.GGT	>23.111.GTA	>23.259.GTC	>23.712.GTG	>23.390.GTT	>23.730.TAA	>23.235.TAC
ETQISSWFSNKRFKIKKS	ERQISSWFRNKRFKIKKS	ELQIMQWFWNKRFKIKKS	EIQIMYWFTNKRHKIKKS	ERQILNWFQNKRRKIKKS	EKQIVYWFHNKRVKIKKS	EKQITNWFENKRRKIKKS	EAQIGMWFCNKRRKIKKS	ELQIRQWFWNKRYKIKKS	ENQISRWFNNKRVKIKKS	EVQIFWWFLNKRWKIKKS	EGQIKKWFENKRFKIKKS	ERQICSWFANKRAKIKKS	EMQIKNWFGNKRYKIKKS	EKQICSWFQNKRAKIKKS	EKQIKVWFQNKRAKIKKS	ESQIMFWFQNKRRKIKKS	ETQISQWFRNKRRKIKKS	ESQISYWFWNKRRKIKKS	ELQIAYWFSNKRRKIKKS	EKQIAYWFQNKRKKIKKS	ELQIIYWFSNKRKKIKKS	ELQIMNWFSNKRKKIKKS	EVQIANWFGNKRKKIKKS	ETQIFNWFANKRRKIKKS	ETQISYWFNNKRRKIKKS	ERQISHWFENKRRKIKKS	ERQICDWFSNKRRKIKKS	EPQIAYWFSNKRRKIKKS	ETQIQYWFGNKRKKIKKS	ELQISNWFQNKRKKIKKS	EAQISYWFGNKRKKIKKS	EHQIGRWFQNKRWKIKKS	EVQITRWFRNKRFKIKKS	ERQIMTWFWNKRWKIKKS	EKQIEKWFVNKRYKIKKS	EGQIIRWFQNKRAKIKKS	EGQIYRWFKNKRYKIKKS	ERQIEDWFRNKRFKIKKS	ERQIQTWFKNKRWKIKKS	ELQIAKWFDNKRYKIKKS	EYQISKWFNNKRQKIKKS	EKQIMKWFENKRRKIKKS	EKQISKWFDNKRMKIKKS	EKQICRWFQNKRSKIKKS	ECQISAWFTNKRGKIKKS	ELQIIRWFENKRYKIKKS	EYQIHNWFRNKRWKIKKS	EVQIATWFANKRAKIKKS	EVQIRIWFSNKRAKIKKS
>24.626.AAA	>24.249.AAC	>24.802.AAG	>24.897.AAT	>24.772.ACA	>24.1287.ACC	>24.1300.ACG	>24.1223.ACT	>24.654.AGA	>24.1048.AGC	>24.869.AGG	>24.672.AGT	>24.531.ATA	>24.947.ATC	>24.952.ATG	>24.528.ATT	>24.248.CAA	>24.173.CAC	>24.1569.CAG	>24.222.CAT	>24.725.CCA	>24.1028.CCC	>24.1279.CCG	>24.1617.CCT	>24.1248.CGA	>24.1082.CGC	>24.1749.CGG	>24.2572.CGT	>24.878.CTA	>24.1727.CTC	>24.768.CTG	>24.554.CTT	>24.185.GAA	>24.40.GAC	>24.388.GAG	>24.67.GAT	>24.244.GCA	>24.188.GCC	>24.94.GCG	>24.71.GCT	>24.651.GGA	>24.417.GGC	>24.688.GGG	>24.234.GGT	>24.111.GTA	>24.253.GTC	>24.643.GTG	>24.341.GTT	>24.712.TAA	>24.228.TAC
ERQILNWFANKRHKIKKS	ESQICSWFRNKRFKIKKS	EVQIDRWFGNKRAKIKKS	EKQIMSWFANKRFKIKKS	EMQIKNWFNNKRRKIKKS	EVQIRNWFHNKRKKIKKS	EKQIRMWFENKRRKIKKS	EKQIAYWFHNKRTKIKKS	EVQIFRWFANKRQKIKKS	EVQIMRWFSNKRVKIKKS	EKQIVKWFENKRVKIKKS	EKQIKKWFENKRNKIKKS	ERQIASWFANKRVKIKKS	ERQIRMWFANKRFKIKKS	ERQINCWFQNKRSKIKKS	ESQIKTWFQNKRNKIKKS	EIQISYWFQNKRRKIKKS	EVQIRMWFSNKRRKIKKS	EKQINRWFVNKRGKIKKS	ESQIGNWFSNKRRKIKKS	EKQIHNWFANKRKKIKKS	EIQISYWFSNKRKKIKKS	ELQIMNWFQNKRKKIKKS	EAQISNWFANKRKKIKKS	ETQIRYWFANKRSKIKKS	ERQIYNWFSNKRRKIKKS	ERQIVTWFENKRRKIKKS	EVQISNWFGNKRAKIKKS	ELQITYWFNNKRKKIKKS	ETQIAYWFGNKRKKIKKS	ETQISNWFQNKRKKIKKS	ELQITYWFGNKRKKIKKS	EGQIARWFQNKRWKIKKS	EEQINRWFRNKRFKIKKS	ETQIARWFWNKRYKIKKS	EKQIEYWFRNKRWKIKKS	EGQIAKWFQNKRRKIKKS	ESQIRLWFKNKRYKIKKS	EFQISDWFRNKRYKIKKS	EEQIGDWFRNKRYKIKKS	EKQIAKWFDNKRWKIKKS	EKQIKKWFNNKRWKIKKS	EKQIVKWFENKRGKIKKS	ERQIRKWFDNKRYKIKKS	EEQIGKWFANKRCKIKKS	ETQIRKWFANKRLKIKKS	EHQIGTWFQNKRYKIKKS	ENQIRVWFANKRFKIKKS	ERQIVVWFRNKRAKIKKS	ENQIRVWFSNKRVKIKKS
>25.619.AAA	>25.243.AAC	>25.790.AAG	>25.847.AAT	>25.768.ACA	>25.1181.ACC	>25.1263.ACG	>25.1218.ACT	>25.638.AGA	>25.969.AGC	>25.843.AGG	>25.665.AGT	>25.527.ATA	>25.942.ATC	>25.895.ATG	>25.502.ATT	>25.241.CAA	>25.173.CAC	>25.1480.CAG	>25.216.CAT	>25.711.CCA	>25.1026.CCC	>25.1211.CCG	>25.1576.CCT	>25.1213.CGA	>25.1065.CGC	>25.1612.CGG	>25.2550.CGT	>25.877.CTA	>25.1702.CTC	>25.744.CTG	>25.549.CTT	>25.184.GAA	>25.40.GAC	>25.382.GAG	>25.67.GAT	>25.236.GCA	>25.173.GCC	>25.91.GCG	>25.71.GCT	>25.637.GGA	>25.404.GGC	>25.655.GGG	>25.215.GGT	>25.109.GTA	>25.246.GTC	>25.624.GTG	>25.327.GTT	>25.704.TAA	>25.225.TAC
ELQITYWFVNKRHKIKKS	ESQIGVWFRNKRFKIKKS	ERQIAQWFWNKRHKIKKS	EKQISSWFSNKRHKIKKS	EDQIVSWFANKRAKIKKS	ERQISNWFHNKRVKIKKS	EVQIGLWFRNKRSKIKKS	EMQIVCWFHNKRRKIKKS	EVQIFRWFANKRHKIKKS	ERQIARWFNNKRVKIKKS	ERQIAKWFENKRVKIKKS	ERQIKKWFENKRLKIKKS	ERQISAWFANKRVKIKKS	EVQIRMWFANKRFKIKKS	EKQIKTWFQNKRDKIKKS	EHQIRVWFQNKRSKIKKS	ELQIHYWFVNKRRKIKKS	ERQIGMWFRNKRRKIKKS	EKQIAQWFWNKRRKIKKS	EVQIVNWFSNKRRKIKKS	EAQIMFWFQNKRKKIKKS	EVQISNWFSNKRKKIKKS	EMQILNWFQNKRKKIKKS	EVQIVNWFHNKRKKIKKS	ELQIFNWFANKRRKIKKS	EIQIGMWFSNKRRKIKKS	ERQIRLWFENKRRKIKKS	ERQIVTWFSNKRRKIKKS	ETQIRFWFSNKRKKIKKS	EKQIQYWFGNKRKKIKKS	ERQIRYWFENKRKKIKKS	ESQILNWFANKRKKIKKS	EGQIGRWFQNKRWKIKKS	EGQIERWFRNKRWKIKKS	EQQISRWFWNKRYKIKKS	ELQIMVWFRNKRYKIKKS	EGQIAKWFQNKRLKIKKS	EQQIIRWFKNKRYKIKKS	EVQIVDWFRNKRYKIKKS	ERQIVDWFRNKRYKIKKS	EAQILKWFDNKRYKIKKS	ESQILKWFNNKRMKIKKS	ERQILKWFENKRSKIKKS	EKQIMKWFDNKRWKIKKS	EFQILRWFQNKRSKIKKS	EVQIWRWFANKRYKIKKS	EMQILRWFENKRYKIKKS	ERQIVAWFANKRYKIKKS	ERQIERWFKNKRAKIKKS	EEQIRVWFSNKRAKIKKS
>26.606.AAA	>26.241.AAC	>26.772.AAG	>26.822.AAT	>26.767.ACA	>26.1094.ACC	>26.1255.ACG	>26.1207.ACT	>26.623.AGA	>26.951.AGC	>26.837.AGG	>26.628.AGT	>26.526.ATA	>26.842.ATC	>26.860.ATG	>26.500.ATT	>26.237.CAA	>26.171.CAC	>26.1404.CAG	>26.215.CAT	>26.702.CCA	>26.1005.CCC	>26.1192.CCG	>26.1545.CCT	>26.1206.CGA	>26.1034.CGC	>26.1574.CGG	>26.2450.CGT	>26.856.CTA	>26.1671.CTC	>26.732.CTG	>26.546.CTT	>26.183.GAA	>26.38.GAC	>26.378.GAG	>26.66.GAT	>26.232.GCA	>26.173.GCC	>26.89.GCG	>26.71.GCT	>26.637.GGA	>26.393.GGC	>26.645.GGG	>26.213.GGT	>26.108.GTA	>26.231.GTC	>26.589.GTG	>26.319.GTT	>26.667.TAA	>26.224.TAC
ERQISSWFANKRHKIKKS	EQQISSWFRNKRHKIKKS	ELQIAQWFWNKRFKIKKS	EVQISNWFSNKRFKIKKS	ETQILNWFHNKRTKIKKS	EKQIAYWFHNKRVKIKKS	ERQIRYWFDNKRRKIKKS	ERQIRDWFHNKRTKIKKS	ENQIRRWFNNKRWKIKKS	EVQICNWFRNKRVKIKKS	EKQIRKWFENKRRKIKKS	ERQIKKWFENKRAKIKKS	EWQIVAWFKNKRYKIKKS	EAQIMAWFVNKRGKIKKS	ERQILTWFQNKRTKIKKS	ESQIRIWFCNKRVKIKKS	ERQISDWFANKRRKIKKS	EPQIMMWFRNKRRKIKKS	ELQILKWFKNKRLKIKKS	EGQILQWFSNKRRKIKKS	EIQISTWFANKRKKIKKS	EVQIMCWFSNKRKKIKKS	EKQIQNWFENKRKKIKKS	EIQISNWFSNKRKKIKKS	EIQIVWWFGNKRAKIKKS	ERQIRDWFSNKRVKIKKS	ERQIRTWFENKRRKIKKS	ERQISDWFSNKRRKIKKS	EAQIFSWFANKRRKIKKS	ESQIRFWFANKRKKIKKS	ESQIKFWFWNKRKKIKKS	ELQICYWFGNKRKKIKKS	ERQIHNWFKNKRFKIKKS	ERQIERWFRNKRFKIKKS	EKQISTWFWNKRYKIKKS	EAQIMIWFRNKRYKIKKS	ENQIMKWFQNKRRKIKKS	ERQIVLWFKNKRWKIKKS	EGQILDWFRNKRYKIKKS	EAQIRDWFRNKRFKIKKS	EKQIAKWFDNKRMKIKKS	RGPESSWFSNKRGKIKKS	EQQILKWFENKRRKIKKS	ERQISKWFDNKRQKIKKS	EVQIAKWFQNKRVKIKKS	ERQIKRWFANKRFKIKKS	ETQIDKWFQNKRYKIKKS	ECQIRIWFANKRYKIKKS	ERQIVIWFRNKRAKIKKS	EHQIRVWFSNKRAKIKKS
>27.605.AAA	>27.238.AAC	>27.762.AAG	>27.815.AAT	>27.751.ACA	>27.1071.ACC	>27.1237.ACG	>27.1190.ACT	>27.600.AGA	>27.925.AGC	>27.828.AGG	>27.620.AGT	>27.517.ATA	>27.839.ATC	>27.838.ATG	>27.499.ATT	>27.235.CAA	>27.158.CAC	>27.1403.CAG	>27.212.CAT	>27.700.CCA	>27.1000.CCC	>27.1191.CCG	>27.1465.CCT	>27.1175.CGA	>27.1002.CGC	>27.1557.CGG	>27.2435.CGT	>27.847.CTA	>27.1619.CTC	>27.682.CTG	>27.540.CTT	>27.181.GAA	>27.38.GAC	>27.371.GAG	>27.65.GAT	>27.228.GCA	>27.168.GCC	>27.89.GCG	>27.70.GCT	>27.625.GGA	>27.369.GGC	>27.645.GGG	>27.212.GGT	>27.108.GTA	>27.228.GTC	>27.588.GTG	>27.305.GTT	>27.654.TAA	>27.223.TAC
EKQIGTWFANKRFKIKKS	ESQIASWFRNKRFKIKKS	ERQIQQWFWNKRWKIKKS	EKQIVQWFCNKRFKIKKS	ESQIRDWFNNKRRKIKKS	ESQIPLWFRNKRAKIKKS	ERQIHHWFENKRRKIKKS	ERQIKGWFSNKRRKIKKS	ESQIFRWFANKRMKIKKS	ETQIRMWFSNKRVKIKKS	ELQILGWFENKRWKIKKS	EKQIWKWFQNKRYKIKKS	EVQIGRWFANKRVKIKKS	ENQIGAWFANKRRKIKKS	EQQIRWWFQNKRWKIKKS	ERQIKVWFQNKRQKIKKS	ELQIMYWFQNKRRKIKKS	EAQIADWFRNKRRKIKKS	EMQICWWFWNKRRKIKKS	EVQICNWFSNKRRKIKKS	EKQITLWFQNKRKKIKKS	ELQIAYWFSNKRKKIKKS	ECQILNWFQNKRKKIKKS	ETQINNWFSNKRKKIKKS	ERQIRDWFGNKRAKIKKS	ETQIRNWFSNKRVKIKKS	EVQISHWFENKRRKIKKS	ERQIVNWFSNKRRKIKKS	EKQIMFWFSNKRKKIKKS	EIQITYWFSNKRKKIKKS	EVQIMYWFQNKRKKIKKS	EGQIVNWFGNKRKKIKKS	EHQIDRWFQNKRWKIKKS	EAQIIRWFRNKRWKIKKS	ESQIARWFWNKRYKIKKS	ELQIRVWFSNKRYKIKKS	EHQIMRWFQNKRRKIKKS	EVQIGIWFKNKRYKIKKS	EPQISDWFRNKRYKIKKS	EVQIMTWFKNKRFKIKKS	ECQIRKWFDNKRWKIKKS	EKQITKWFNNKRLKIKKS	EQQIAKWFENKRGKIKKS	ERQITKWFDNKRMKIKKS	EAQILRWFQNKRGKIKKS	EYQIQRWFGNKRSKIKKS	ELQITTWFQNKRYKIKKS	EVQISRWFGNKRYKIKKS	ERQIVTWFNNKRAKIKKS	EGQIRIWFSNKRAKIKKS
>28.599.AAA	>28.237.AAC	>28.757.AAG	>28.807.AAT	>28.748.ACA	>28.1037.ACC	>28.1210.ACG	>28.1169.ACT	>28.598.AGA	>28.914.AGC	>28.789.AGG	>28.615.AGT	>28.516.ATA	>28.838.ATC	>28.830.ATG	>28.497.ATT	>28.233.CAA	>28.155.CAC	>28.1364.CAG	>28.210.CAT	>28.669.CCA	>28.991.CCC	>28.1189.CCG	>28.1435.CCT	>28.1170.CGA	>28.999.CGC	>28.1554.CGG	>28.2203.CGT	>28.833.CTA	>28.1520.CTC	>28.647.CTG	>28.530.CTT	>28.176.GAA	>28.37.GAC	>28.370.GAG	>28.64.GAT	>28.211.GCA	>28.163.GCC	>28.88.GCG	>28.69.GCT	>28.617.GGA	>28.353.GGC	>28.629.GGG	>28.204.GGT	>28.106.GTA	>28.223.GTC	>28.586.GTG	>28.298.GTT	>28.646.TAA	>28.222.TAC
ERQILTWFANKRHKIKKS	ERQIVSWFRNKRFKIKKS	EHQIKQWFWNKRYKIKKS	ERQIATWFVNKRFKIKKS	EKQIMNWFNNKRRKIKKS	EKQILNWFQNKRKKIKKS	ETQIRYWFENKRRKIKKS	EIQICTWFSNKRVKIKKS	ERQIFRWFANKRRKIKKS	ESQIRGWFANKRRKIKKS	EGQILKWFENKRAKIKKS	ERQIDKWFQNKRHKIKKS	EKQILYWFANKRQKIKKS	ESQIAGWFSNKRCKIKKS	EVQIVYWFQNKRWKIKKS	EKQIMNWFMNKRQKIKKS	EMQIFHWFANKRRKIKKS	ELQIGMWFRNKRRKIKKS	ELQISKWFSNKRSKIKKS	EIQILQWFSNKRRKIKKS	EKQIVCWFQNKRKKIKKS	EPQIAMWFSNKRKKIKKS	EKQISYWFENKRKKIKKS	EVQIANWFGNKRKKIKKS	EKQISMWFANKRVKIKKS	EKQIVMWFNNKRRKIKKS	EVQISRWFENKRRKIKKS	ERQISTWFNNKRRKIKKS	ETQIHNWFANKRKKIKKS	EVQITYWFSNKRKKIKKS	ERQIVFWFQNKRKKIKKS	EQQIMWWFGNKRAKIKKS	EQQISYWFKNKRWKIKKS	EGQIERWFRNKRWKIKKS	ELQIARWFWNKRYKIKKS	EVQISRWFLNKRYKIKKS	ERQITKWFQNKRLKIKKS	EEQIRVWFKNKRWKIKKS	EQQIEDWFRNKRYKIKKS	EWQITGWFKNKRFKIKKS	EKQISKWFDNKRCKIKKS	EVQIIKWFNNKRQKIKKS	ETQIMKWFENKRWKIKKS	EKQIRKWFDNKRQKIKKS	EVQILRWFQNKRSKIKKS	EYQIIKWFANKRWKIKKS	EVQITRWFENKRFKIKKS	EEQIAKWFCNKRWKIKKS	ERQITIWFVNKRAKIKKS	EEQIRVWFSNKRSKIKKS
>29.565.AAA	>29.236.AAC	>29.757.AAG	>29.806.AAT	>29.739.ACA	>29.1027.ACC	>29.1162.ACG	>29.1159.ACT	>29.595.AGA	>29.898.AGC	>29.786.AGG	>29.606.AGT	>29.512.ATA	>29.807.ATC	>29.763.ATG	>29.478.ATT	>29.228.CAA	>29.149.CAC	>29.1329.CAG	>29.205.CAT	>29.646.CCA	>29.986.CCC	>29.1155.CCG	>29.1411.CCT	>29.1151.CGA	>29.956.CGC	>29.1512.CGG	>29.2198.CGT	>29.810.CTA	>29.1433.CTC	>29.641.CTG	>29.530.CTT	>29.173.GAA	>29.37.GAC	>29.350.GAG	>29.63.GAT	>29.209.GCA	>29.149.GCC	>29.88.GCG	>29.69.GCT	>29.586.GGA	>29.340.GGC	>29.613.GGG	>29.203.GGT	>29.106.GTA	>29.220.GTC	>29.579.GTG	>29.292.GTT	>29.629.TAA	>29.222.TAC
ERQIHYWFVNKRSKIKKS	EKQIESWFRNKRFKIKKS	ELQIKQWFWNKRFKIKKS	ERQIMMWFTNKRFKIKKS	EKQINQWFQNKRRKIKKS	EWQIVSWFKNKRFKIKKS	EMQILKWFCNKRPKIKKS	EQQIKHWFHNKRMKIKKS	EKQIFRWFANKRSKIKKS	ERQIITWFGNKRTKIKKS	EKQISKWFENKRGKIKKS	EKQIHKWFENKRFKIKKS	ERQIRTWFANKRVKIKKS	ETQIRMWFANKRFKIKKS	ERQISTWFQNKRTKIKKS	EKQIAYWFMNKRAKIKKS	ELQIHHWFCNKRRKIKKS	ERQIGMWFRNKRRKIKKS	EQQISYWFWNKRRKIKKS	EMQIVQWFSNKRRKIKKS	EVQISNWFANKRKKIKKS	ETQIRDWFSNKRKKIKKS	EKQILNWFQNKRKKIKKS	ELQITNWFSNKRKKIKKS	ERQIGHWFANKRAKIKKS	EKQISNWFSNKRRKIKKS	EKQICMWFENKRRKIKKS	EVQIYYWFSNKRRKIKKS	ERQIHYWFANKRAKIKKS	ERQITMWFANKRKKIKKS	ELQIVNWFQNKRRKIKKS	EKQIINWFGNKRKKIKKS	EQQIQRWFQNKRWKIKKS	EMQIVRWFRNKRWKIKKS	ELQIQRWFWNKRYKIKKS	EKQIMKWFVNKRWKIKKS	ERQICKWFQNKRMKIKKS	EEQIRVWFKNKRWKIKKS	ESQIIGWFSNKREKIKKS	EQQIKDWFRNKRYKIKKS	EYQIHKWFDNKRQKIKKS	EFQIAKWFNNKRQKIKKS	EMQISKWFENKRAKIKKS	ERQIAKWFDNKRYKIKKS	EWQITKWFQNKRGKIKKS	ETQISKWFRNKRFKIKKS	EYQIARWFENKRFKIKKS	ESQISRWFGNKRYKIKKS	ERQIVVWFSNKRAKIKKS	ELQIRIWFSNKRAKIKKS
>30.561.AAA	>30.231.AAC	>30.757.AAG	>30.805.AAT	>30.702.ACA	>30.953.ACC	>30.1096.ACG	>30.1003.ACT	>30.586.AGA	>30.872.AGC	>30.786.AGG	>30.601.AGT	>30.509.ATA	>30.798.ATC	>30.755.ATG	>30.471.ATT	>30.220.CAA	>30.149.CAC	>30.1307.CAG	>30.204.CAT	>30.640.CCA	>30.934.CCC	>30.1103.CCG	>30.1295.CCT	>30.1123.CGA	>30.955.CGC	>30.1411.CGG	>30.2143.CGT	>30.808.CTA	>30.1366.CTC	>30.526.CTG	>30.525.CTT	>30.164.GAA	>30.37.GAC	>30.343.GAG	>30.63.GAT	>30.206.GCA	>30.139.GCC	>30.88.GCG	>30.69.GCT	>30.577.GGA	>30.334.GGC	>30.612.GGG	>30.202.GGT	>30.106.GTA	>30.218.GTC	>30.489.GTG	>30.291.GTT	>30.624.TAA	>30.221.TAC
ERQIDAWFPNKRRKIKKS	EFQIMQWFRNKRFKIKKS	ERQILQWFWNKRFKIKKS	EKQIMSWFSNKRHKIKKS	ENQISWWFWNKRRKIKKS	EKQIMYWFHNKREKIKKS	EKQIRRWFENKRRKIKKS	EVQIARWFENKRAKIKKS	EVQIFRWFANKRAKIKKS	ENQIRMWFSNKRVKIKKS	EKQIRKWFENKRLKIKKS	EKQIKKWFENKRFKIKKS	EKQIACWFANKRTKIKKS	EVQITLWFSNKRSKIKKS	ERQIIFWFQNKRVKIKKS	ERQII_WFMNKRLKIKKS	EEQIMYWFQNKRRKIKKS	EVQIGYWFSNKRRKIKKS	ELQISYWFWNKRRKIKKS	ELQIGNWFSNKRRKIKKS	ESQIHYWFCNKRRKIKKS	EKQIGEWFRNKRKKIKKS	EVQIKYWFENKRKKIKKS	EVQIVNWFSNKRKKIKKS	ERQIFYWFSNKRVKIKKS	ESQIRDWFSNKRRKIKKS	EVQIIHWFENKRRKIKKS	ESQIVNWFSNKRRKIKKS	EKQISGWFANKRKKIKKS	EGQIRMWFSNKRRKIKKS	EKQIQNWFQNKRKKIKKS	EVQITNWFGNKRRKIKKS	EMQIKRWFQNKRWKIKKS	EPQIERWFRNKRFKIKKS	EQQINRWFWNKRYKIKKS	ELQIMVWFRNKRYKIKKS	EYQIVRWFQNKRRKIKKS	EGQIVRWFKNKRFKIKKS	EFQIQDWFRNKRYKIKKS	ERQILDWFRNKRYKIKKS	ELQIAKWFDNKRQKIKKS	ELQILKWFNNKRQKIKKS	EMQISKWFENKRWKIKKS	EKQINKWFDNKRMKIKKS	EVQITRWFQNKRLKIKKS	EKQIGKWFRNKRMKIKKS	EKQIMKWFENKRRKIKKS	ELQIGVWFRNKRYKIKKS	EVQIVVWFNNKRAKIKKS	EAQIRVWFSNKRAKIKKS
>31.553.AAA	>31.231.AAC	>31.745.AAG	>31.800.AAT	>31.697.ACA	>31.844.ACC	>31.1060.ACG	>31.968.ACT	>31.576.AGA	>31.838.AGC	>31.772.AGG	>31.592.AGT	>31.506.ATA	>31.786.ATC	>31.752.ATG	>31.462.ATT	>31.214.CAA	>31.149.CAC	>31.1270.CAG	>31.204.CAT	>31.628.CCA	>31.869.CCC	>31.1076.CCG	>31.1277.CCT	>31.1117.CGA	>31.948.CGC	>31.1346.CGG	>31.2120.CGT	>31.806.CTA	>31.1341.CTC	>31.525.CTG	>31.507.CTT	>31.163.GAA	>31.36.GAC	>31.313.GAG	>31.62.GAT	>31.206.GCA	>31.132.GCC	>31.87.GCG	>31.65.GCT	>31.563.GGA	>31.325.GGC	>31.610.GGG	>31.200.GGT	>31.103.GTA	>31.212.GTC	>31.480.GTG	>31.286.GTT	>31.609.TAA	>31.218.TAC
ETQIMYWFANKRHKIKKS	EKQIGSWFRNKRHKIKKS	ERQIKQWFWNKRFKIKKS	ERQILSWFSNKRFKIKKS	EGQIYNWFNNKRRKIKKS	ERQITNWFHNKRVKIKKS	ESQILWWFTNKREKIKKS	EAQISSWFHNKRTKIKKS	EKQIFRWFANKRWKIKKS	EVQISRWFNNKRVKIKKS	ETQIMKWFENKRYKIKKS	EHQIRKWFENKRYKIKKS	ELQIRWWFNNKRQKIKKS	ELQITRWFGNKRQKIKKS	ERQIQVWFWNKRQKIKKS	EAQIRVWFQNKRAKIKKS	ELQIAYWFQNKRRKIKKS	ERQIMMWFSNKRRKIKKS	EKQIMMWFWNKRRKIKKS	EAQIAQWFSNKRRKIKKS	ELQIHYWFANKRKKIKKS	ELQIAYWFSNKRKKIKKS	EVQICNWFHNKRRKIKKS	ETQIANWFSNKRKKIKKS	EVQIMYWFQNKRRKIKKS	ESQIRDWFSNKRRKIKKS	EVQIGRWFENKRRKIKKS	ERQISGWFNNKRRKIKKS	ELQIMYWFANKRKKIKKS	ELQITYWFSNKRKKIKKS	EKQIMYWFWNKRKKIKKS	ESQITYWFGNKRKKIKKS	EEQIGRWFQNKRWKIKKS	EGQIQRWFRNKRWKIKKS	EKQIMTWFWNKRWKIKKS	EEQIGRWFLNKRYKIKKS	EQQILKWFANKRRKIKKS	EKQIVLWFKNKRYKIKKS	EAQIADWFRNKRYKIKKS	ERQIVDWFRNKRFKIKKS	EQQILKWFDNKRQKIKKS	EGQILKWFNNKRFKIKKS	ERQIGKWFENKRRKIKKS	EVQIGKWFNNKRAKIKKS	EYQIARWFGNKRWKIKKS	ERQILRWFGNKRFKIKKS	ERQIARWFENKRFKIKKS	EAQIIRWFSNKRYKIKKS	ERQIVLWFRNKRAKIKKS	EYQICRWFINKRAKIKKS
>32.547.AAA	>32.231.AAC	>32.739.AAG	>32.780.AAT	>32.678.ACA	>32.816.ACC	>32.1058.ACG	>32.946.ACT	>32.576.AGA	>32.817.AGC	>32.761.AGG	>32.591.AGT	>32.492.ATA	>32.770.ATC	>32.752.ATG	>32.452.ATT	>32.214.CAA	>32.147.CAC	>32.1212.CAG	>32.199.CAT	>32.627.CCA	>32.857.CCC	>32.1058.CCG	>32.1253.CCT	>32.1112.CGA	>32.948.CGC	>32.1334.CGG	>32.2090.CGT	>32.805.CTA	>32.1202.CTC	>32.490.CTG	>32.480.CTT	>32.162.GAA	>32.36.GAC	>32.311.GAG	>32.62.GAT	>32.202.GCA	>32.119.GCC	>32.86.GCG	>32.64.GCT	>32.509.GGA	>32.315.GGC	>32.610.GGG	>32.199.GGT	>32.102.GTA	>32.210.GTC	>32.474.GTG	>32.276.GTT	>32.560.TAA	>32.213.TAC
EAQISMWFANKRHKIKKS	EAQIMAWFRNKRFKIKKS	EKQISQWFWNKRWKIKKS	ERQIAQWFSNKRFKIKKS	ESQIRMWFQNKRRKIKKS	ERQILSWFANKRKKIKKS	EYQIVLWFTNKRVKIKKS	ESQIWLWFVNKR_KIKKS	EKQISRWFWNKRYKIKKS	EYQIACWFSNKRVKIKKS	ERQIAKWFENKRRKIKKS	EGQIKKWFENKRWKIKKS	EKQILSWFANKRAKIKKS	ERQIGMWFANKRYKIKKS	EHQIKSWFLNKRRKIKKS	EYQIVLWFQNKRQKIKKS	EIQIYYWFVNKRRKIKKS	ECQIGMWFRNKRRKIKKS	ERQIKYWFWNKRRKIKKS	EHQISNWFSNKRRKIKKS	ESQITDWFANKRKKIKKS	ERQIMTWFSNKRKKIKKS	EKQINDWFQNKRKKIKKS	ERQIADWFGNKRKKIKKS	EVQIFNWFANKRAKIKKS	EVQILMWFSNKRRKIKKS	EKQIIVWFHNKRSKIKKS	EQQITWWFNNKRKKIKKS	EQQIHMWFANKRKKIKKS	EKQIYYWFQNKRKKIKKS	EKQITTWFENKRKKIKKS	EAQIVYWFGNKRRKIKKS	EEQICHWFKNKRFKIKKS	EGQISRWFRNKRWKIKKS	EVQISRWFWNKRYKIKKS	EDQIRVWFSNKRYKIKKS	EYQITRWFQNKRAKIKKS	ERQITLWFKNKRFKIKKS	EKQITDWFRNKRYKIKKS	EVQITDWFRNKRFKIKKS	EGQIHKWFDNKRQKIKKS	ETQIAKWFSNKRQKIKKS	ESQIMKWFENKRMKIKKS	ERQISGWFSNKRLKIKKS	ESQIERWFSNKRYKIKKS	EQQIAKWFRNKRLKIKKS	EKQISKWFENKRQKIKKS	EGQIKSWFANKRYKIKKS	EKQIVVWFSNKRAKIKKS	ECQIRVWFSNKRAKIKKS
>33.542.AAA	>33.231.AAC	>33.736.AAG	>33.776.AAT	>33.645.ACA	>33.815.ACC	>33.1033.ACG	>33.918.ACT	>33.571.AGA	>33.814.AGC	>33.744.AGG	>33.585.AGT	>33.491.ATA	>33.765.ATC	>33.751.ATG	>33.428.ATT	>33.212.CAA	>33.145.CAC	>33.1197.CAG	>33.194.CAT	>33.619.CCA	>33.843.CCC	>33.1051.CCG	>33.1222.CCT	>33.1069.CGA	>33.933.CGC	>33.1289.CGG	>33.2020.CGT	>33.768.CTA	>33.1193.CTC	>33.426.CTG	>33.472.CTT	>33.161.GAA	>33.36.GAC	>33.309.GAG	>33.62.GAT	>33.201.GCA	>33.119.GCC	>33.83.GCG	>33.63.GCT	>33.492.GGA	>33.306.GGC	>33.606.GGG	>33.196.GGT	>33.102.GTA	>33.192.GTC	>33.467.GTG	>33.275.GTT	>33.542.TAA	>33.211.TAC
ESQISTWFANKRFKIKKS	EKQICAWFRNKRHKIKKS	ERQILQWFWNKRHKIKKS	ERQILSWFSNKRFKIKKS	EMQIKNWFWNKRRKIKKS	EIQIKYWFENKRRKIKKS	ERQITTWFQNKRIKIKKS	EGQIGWWFVNKRFKIKKS	EGQIFRWFANKRWKIKKS	EKQITRWFNNKRVKIKKS	EIQISWWFLNKRPKIKKS	EKQIRKWFENKRWKIKKS	ERQIMSWFANKRVKIKKS	EKQIATWFRNKRVKIKKS	EKQIIHWFQNKRMKIKKS	EPQIKVWFQNKRAKIKKS	ESQIAQWFANKRRKIKKS	EEQIGMWFRNKRRKIKKS	EVQIKHWFWNKRRKIKKS	EKQINQWFSNKRRKIKKS	ESQIANWFANKRKKIKKS	EVQIATWFSNKRKKIKKS	EKQIMYWFENKRRKIKKS	ELQINNWFSNKRKKIKKS	ERQISNWFGNKRAKIKKS	EVQIGMWFNNKRRKIKKS	EVQILRWFENKRRKIKKS	ETQISHWFGNKRRKIKKS	EKQIRYWFANKRKKIKKS	EQQIRFWFANKRKKIKKS	ERQITYWFWNKRKKIKKS	EVQIANWFGNKRRKIKKS	ERQIRRWFQNKRWKIKKS	EAQIVRWFRNKRWKIKKS	EEQINRWFWNKRYKIKKS	EGQIAVWFRNKRYKIKKS	EVQILRWFQNKRAKIKKS	ELQIVSWFKNKRYKIKKS	ELQISDWFRNKRYKIKKS	EQQISDWFRNKRFKIKKS	EGQIFRWFANKRWKIKKS	ECQIMKWFNNKRTKIKKS	EFQISKWFENKRRKIKKS	EKQIGKWFGNKRQKIKKS	EEQIRRWFDNKRWKIKKS	ERQIRRWFGNKRFKIKKS	ERQIVKWFENKRAKIKKS	ENQINRWFANKRFKIKKS	EVQIAVWFCNKRAKIKKS	ETQIRIWFSNKRAKIKKS
>34.534.AAA	>34.228.AAC	>34.728.AAG	>34.761.AAT	>34.627.ACA	>34.807.ACC	>34.973.ACG	>34.911.ACT	>34.559.AGA	>34.810.AGC	>34.743.AGG	>34.570.AGT	>34.486.ATA	>34.698.ATC	>34.736.ATG	>34.420.ATT	>34.211.CAA	>34.144.CAC	>34.1186.CAG	>34.194.CAT	>34.589.CCA	>34.833.CCC	>34.1012.CCG	>34.1217.CCT	>34.1062.CGA	>34.909.CGC	>34.1247.CGG	>34.1987.CGT	>34.767.CTA	>34.1182.CTC	>34.425.CTG	>34.464.CTT	>34.158.GAA	>34.36.GAC	>34.309.GAG	>34.61.GAT	>34.201.GCA	>34.112.GCC	>34.82.GCG	>34.63.GCT	>34.482.GGA	>34.301.GGC	>34.603.GGG	>34.190.GGT	>34.101.GTA	>34.179.GTC	>34.465.GTG	>34.268.GTT	>34.526.TAA	>34.210.TAC
EKQIYYWFVNKRFKIKKS	ELQISSWFRNKRFKIKKS	EKQIMQWFWNKRAKIKKS	EKQINSWFANKRFKIKKS	EKQIRQWFQNKRRKIKKS	EKQISSWFHNKRSKIKKS	ERQIKHWFENKRRKIKKS	ETQINNWFHNKRVKIKKS	ETQIRYWFQNKRTKIKKS	EKQILRWFNNKRVKIKKS	EKQIAKWFENKRRKIKKS	ERQIRKWFENKRNKIKKS	EYQIMSWFMNKRRKIKKS	ETQIRMWFANKRFKIKKS	ETQIRSWFANKRRKIKKS	ERQIYIWFCNKRAKIKKS	ESQIFNWFANKRRKIKKS	ELQIMYWFSNKRRKIKKS	EQQISHWFWNKRRKIKKS	ERQIGNWFSNKRRKIKKS	EKQIHNWFANKRKKIKKS	EKQIGEWFRNKRKKIKKS	EMQIANWFQNKRKKIKKS	EMQITNWFSNKRKKIKKS	EKQIADWFANKRRKIKKS	ENQILMWFSNKRRKIKKS	EAQISRWFENKRRKIKKS	ERQITNWFSNKRRKIKKS	EVQIFYWFCNKRKKIKKS	ESQIKYWFSNKRKKIKKS	EIQIRYWFENKRKKIKKS	ELQIAYWFGNKRSKIKKS	ERQIECWFKNKRYKIKKS	EEQISRWFRNKRFKIKKS	EMQITRWFWNKRYKIKKS	ESQINKWFINKRWKIKKS	EHQIGRWFQNKRAKIKKS	EMQIRLWFKNKRYKIKKS	ERQIEDWFRNKRYKIKKS	ELQITDWFRNKRYKIKKS	EVQIEMWFRNKRCKIKKS	EQQITKWFNNKRQKIKKS	ESQILKWFENKRRKIKKS	EQQIYKWFDNKRQKIKKS	ELQITRWFQNKRSKIKKS	ESQIAKWFRNKRAKIKKS	EQQIQVWFQNKRYKIKKS	ERQIVVWFRNKRYKIKKS	ERQITVWFNNKRAKIKKS	EEQIRVWFSNKRSKIKKS
>35.531.AAA	>35.228.AAC	>35.715.AAG	>35.745.AAT	>35.620.ACA	>35.804.ACC	>35.964.ACG	>35.910.ACT	>35.557.AGA	>35.810.AGC	>35.726.AGG	>35.557.AGT	>35.477.ATA	>35.676.ATC	>35.733.ATG	>35.416.ATT	>35.211.CAA	>35.142.CAC	>35.1171.CAG	>35.194.CAT	>35.581.CCA	>35.832.CCC	>35.1010.CCG	>35.1146.CCT	>35.1054.CGA	>35.905.CGC	>35.1215.CGG	>35.1954.CGT	>35.765.CTA	>35.1128.CTC	>35.409.CTG	>35.461.CTT	>35.157.GAA	>35.35.GAC	>35.303.GAG	>35.60.GAT	>35.192.GCA	>35.109.GCC	>35.79.GCG	>35.62.GCT	>35.456.GGA	>35.299.GGC	>35.602.GGG	>35.188.GGT	>35.101.GTA	>35.177.GTC	>35.420.GTG	>35.266.GTT	>35.494.TAA	>35.207.TAC
ERQINSWFSNKRFKIKKS	ESQINGWFRNKRFKIKKS	ELQIQQWFWNKRHKIKKS	ELQIRSWFSNKRFKIKKS	ESQIRYWFWNKRRKIKKS	ELQIKNWFENKRKKIKKS	ELQIRWWFDNKRRKIKKS	ERQIKYWFENKRRKIKKS	ETQIFRWFANKRQKIKKS	EKQISRWFNNKRVKIKKS	ERQIRKWFENKRSKIKKS	ERQIHVWFQNKRYKIKKS	EKQIASWFSNKRAKIKKS	ELQIRTWFSNKRMKIKKS	EKQIIYWFQNKRSKIKKS	ETQIVSWFGNKRCKIKKS	ENQIAQWFANKRRKIKKS	ELQIYYWFSNKRRKIKKS	E_QIRDWFDNKRLKIKKS	EAQIATWFSNKRRKIKKS	EVQISNWFSNKRKKIKKS	ESQIVNWFSNKRKKIKKS	ERQIQNWFENKRKKIKKS	EQQIVNWFSNKRKKIKKS	EKQITDWFANKRQKIKKS	EQQISCWFSNKRRKIKKS	EVQIQHWFENKRRKIKKS	EVQILYWFSNKRRKIKKS	ERQILYWFQNKRRKIKKS	ETQIRNWFTNKRKKIKKS	ESQIATWFSNKRVKIKKS	EKQILNWFANKRKKIKKS	EGQITRWFQNKRWKIKKS	ETQIVRWFRNKRWKIKKS	EKQINTWFWNKRYKIKKS	EWQIRVWFSNKRYKIKKS	EKQITKWFQNKRRKIKKS	ELQIQTWFKNKRYKIKKS	ELQIIIWFKNKRYKIKKS	ERQISDWFRNKRQKIKKS	ESQIHKWFDNKRYKIKKS	ETQIGKWFNNKRMKIKKS	EPQILKWFENKRRKIKKS	ECQIIKWFDNKRYKIKKS	EGQILRWFQNKRVKIKKS	ERQIVKWFANKRLKIKKS	EGQITKWFENKRFKIKKS	ERQILKWFSNKRFKIKKS	EKQIMVWFANKRAKIKKS	EEQIRVWFSNKRVKIKKS
>36.525.AAA	>36.226.AAC	>36.704.AAG	>36.730.AAT	>36.617.ACA	>36.796.ACC	>36.960.ACG	>36.890.ACT	>36.546.AGA	>36.809.AGC	>36.723.AGG	>36.534.AGT	>36.472.ATA	>36.668.ATC	>36.708.ATG	>36.412.ATT	>36.207.CAA	>36.141.CAC	>36.1145.CAG	>36.191.CAT	>36.565.CCA	>36.824.CCC	>36.1005.CCG	>36.1139.CCT	>36.1049.CGA	>36.890.CGC	>36.1193.CGG	>36.1877.CGT	>36.756.CTA	>36.1128.CTC	>36.382.CTG	>36.455.CTT	>36.157.GAA	>36.35.GAC	>36.292.GAG	>36.59.GAT	>36.191.GCA	>36.101.GCC	>36.79.GCG	>36.61.GCT	>36.441.GGA	>36.285.GGC	>36.587.GGG	>36.185.GGT	>36.100.GTA	>36.176.GTC	>36.413.GTG	>36.263.GTT	>36.492.TAA	>36.205.TAC
ERQIYYWFVNKRFKIKKS	ESQITSWFRNKRFKIKKS	EVQIKQWFWNKRHKIKKS	ESQIRYWFQNKRNKIKKS	EIQIVYWFHNKRTKIKKS	EKQIAGWFHNKRTKIKKS	ERQIMRWFGNKRVKIKKS	EYQILLWFVNKRLKIKKS	ETQIFRWFANKRMKIKKS	ELQIALWFLNKRGKIKKS	EKQIRKWFENKRRKIKKS	EKQIKKWFENKRMKIKKS	EQQIRWWFNNKRQKIKKS	EIQIVRWFPNKRFKIKKS	EKQIIYWFQNKRNKIKKS	EKQIKLWFTNKRAKIKKS	EGQIHHWFANKRRKIKKS	EVQISYWFSNKRRKIKKS	EMQISNWFWNKRRKIKKS	EIQIMQWFSNKRRKIKKS	ELQIHNWFCNKRKKIKKS	ESQIANWFSNKRKKIKKS	EVQIANWFANKRKKIKKS	EVQITNWFGNKRKKIKKS	ERQIHYWFANKRAKIKKS	EKQISNWFSNKRKKIKKS	ESQIQHWFENKRRKIKKS	EAQIMNWFSNKRRKIKKS	EKQIEYWFANKRKKIKKS	EGQIRMWFANKRKKIKKS	EKQIVYWFQNKRKKIKKS	EQQIVWWFGNKRAKIKKS	ESQISRWFQNKRWKIKKS	EGQITRWFRNKRWKIKKS	ERQISSWFWNKRYKIKKS	ERQITHWFRNKRWKIKKS	ESQILKWFQNKRVKIKKS	ELQIKVWFKNKRYKIKKS	EKQINDWFRNKRSKIKKS	EFQISDWFRNKRYKIKKS	ERQISKWFDNKRAKIKKS	EQQIPMWFFNKRGKIKKS	EGQILKWFENKRRKIKKS	EKQILKWFDNKRQKIKKS	ETQILRWFQNKRSKIKKS	EKQILRWFSNKRMKIKKS	EKQIWTWFQNKRWKIKKS	EKQIMVWFRNKRYKIKKS	EKQIGVWFVNKRAKIKKS	EEQIRVWFSNKRAKIKKS
>37.522.AAA	>37.226.AAC	>37.703.AAG	>37.701.AAT	>37.604.ACA	>37.791.ACC	>37.959.ACG	>37.868.ACT	>37.542.AGA	>37.733.AGC	>37.701.AGG	>37.533.AGT	>37.464.ATA	>37.667.ATC	>37.703.ATG	>37.403.ATT	>37.207.CAA	>37.137.CAC	>37.1136.CAG	>37.188.CAT	>37.560.CCA	>37.822.CCC	>37.917.CCG	>37.1031.CCT	>37.1034.CGA	>37.890.CGC	>37.1035.CGG	>37.1783.CGT	>37.755.CTA	>37.1000.CTC	>37.376.CTG	>37.455.CTT	>37.157.GAA	>37.35.GAC	>37.286.GAG	>37.59.GAT	>37.191.GCA	>37.100.GCC	>37.77.GCG	>37.61.GCT	>37.438.GGA	>37.277.GGC	>37.533.GGG	>37.185.GGT	>37.98.GTA	>37.175.GTC	>37.410.GTG	>37.262.GTT	>37.467.TAA	>37.194.TAC
EKQISYWFVNKRHKIKKS	EKQITSWFRNKRFKIKKS	EMQIKQWFWNKRHKIKKS	EKQIMNWFSNKRHKIKKS	EVQIRDWFNNKRRKIKKS	ESQIKSWFHNKRMKIKKS	EWQIYAWFKNKRYKIKKS	ERQISSWFHNKRMKIKKS	ERQIRRWFNNKRYKIKKS	EQQISSWFLNKRLKIKKS	ETQIAKWFENKRRKIKKS	EYQIRKWFENKRYKIKKS	EKQIRWWFNNKRWKIKKS	ERQIRSWFSNKRQKIKKS	ERQIATWFANKRHKIKKS	EIQIKTWFQNKRSKIKKS	ETQIMFWFQNKRRKIKKS	ELQIAYWFSNKRRKIKKS	EKQISTWFSNKRSKIKKS	ERQIMQWFGNKRRKIKKS	EKQITQWFQNKRKKIKKS	ETQISTWFSNKRKKIKKS	EMQITNWFQNKRKKIKKS	ETQIVNWFGNKRKKIKKS	EKQILYWFQNKRMKIKKS	EKQIGNWFSNKRRKIKKS	EKQIIWWFENKRRKIKKS	EVQISNWFSNKRRKIKKS	EQQIRYWFSNKRKKIKKS	ELQILNWFKNKRKKIKKS	EKQISMWFQNKRKKIKKS	EMQIVYWFGNKRSKIKKS	EAQIRRWFQNKRWKIKKS	ESQIERWFRNKRWKIKKS	EQQIKQWFWNKRYKIKKS	EYQIMRWFLNKRYKIKKS	EKQIARWFQNKRRKIKKS	EEQIRLWFKNKRYKIKKS	EGQIYRWFKNKRYKIKKS	EGQIVNWFRNKRFKIKKS	EKQINKWFDNKRVKIKKS	ERQISKWFNNKRQKIKKS	EGQICKWFENKRRKIKKS	EQQILKWFNNKRAKIKKS	EYQIQKWFQNKRMKIKKS	ERQIAKWFSNKRRKIKKS	ERQITKWFENKRAKIKKS	EVQISRWFGNKRYKIKKS	ERQITIWFRNKRQKIKKS	EEQIRVWFSNKRVKIKKS
>38.520.AAA	>38.221.AAC	>38.702.AAG	>38.698.AAT	>38.592.ACA	>38.788.ACC	>38.956.ACG	>38.864.ACT	>38.537.AGA	>38.727.AGC	>38.694.AGG	>38.523.AGT	>38.464.ATA	>38.661.ATC	>38.695.ATG	>38.380.ATT	>38.207.CAA	>38.137.CAC	>38.1122.CAG	>38.186.CAT	>38.553.CCA	>38.805.CCC	>38.916.CCG	>38.1026.CCT	>38.1012.CGA	>38.869.CGC	>38.1033.CGG	>38.1777.CGT	>38.745.CTA	>38.983.CTC	>38.374.CTG	>38.454.CTT	>38.157.GAA	>38.35.GAC	>38.276.GAG	>38.58.GAT	>38.188.GCA	>38.95.GCC	>38.76.GCG	>38.60.GCT	>38.428.GGA	>38.269.GGC	>38.528.GGG	>38.181.GGT	>38.96.GTA	>38.173.GTC	>38.409.GTG	>38.262.GTT	>38.458.TAA	>38.191.TAC
ESQIANWFSNKRFKIKKS	EAQISSWFRNKRHKIKKS	EKQITQWFWNKRWKIKKS	ETQIRTWFTNKRFKIKKS	ELQISNWFNNKRRKIKKS	ESQIESWFPNKRCKIKKS	ERQIVWWFSNKRRKIKKS	EKQIKYWFENTRKKIKKS	ESQIKDWFKNKRWKIKKS	EWQIYAWFKNKRFKIKKS	ERQIHKWFENKRSKIKKS	EMQIKKWFENKRFKIKKS	ENQIRWWFNNKRTKIKKS	EVQIVSWFRNKRVKIKKS	ERQITSWFQNKRHKIKKS	EKQIRLWFQNKRAKIKKS	ELQILYWFQNKRRKIKKS	ELQIMMWFSNKRRKIKKS	ERQILDWFANKRRKIKKS	EKQILQWFSNKRRKIKKS	ELQIHYWFANKRKKIKKS	ETQIGNWFSNKRKKIKKS	EMQIKNWFWNKRKKIKKS	EVQISNWFSNKRKKIKKS	ELQIMYWFANKRAKIKKS	EKQISMWFNNKRRKIKKS	ESQIQRWFENKRRKIKKS	EVQISNWFCNKRRKIKKS	EKQIMYWFANKRVKIKKS	ESQIRFWFSNKRKKIKKS	EKQIQYWFENKRKKIKKS	ELQIVYWFGNKRSKIKKS	EAQIVRWFQNKRWKIKKS	EAQIVRWFRNKRFKIKKS	ESQITRWFWNKRYKIKKS	EMQISHWFRNKRWKIKKS	ERQILRWFQNKRCKIKKS	ECQIRVWFKNKRFKIKKS	EAQIMDWFRNKRFKIKKS	EAQISDWFRNKRFKIKKS	EWQIAKWFDNKRYKIKKS	ERQIVKWFNNKRQKIKKS	ENQIMKWFENKRWKIKKS	EMQITKWFGNKRWKIKKS	EVQILRWFQNKRGKIKKS	EQQILKWFRNKRCKIKKS	EAQIAKWFMNKRAKIKKS	EAQIRIWFSNKRYKIKKS	ERQIAIWFVNKRAKIKKS	EGQIRIWFSNKRAKIKKS
>39.518.AAA	>39.220.AAC	>39.692.AAG	>39.687.AAT	>39.589.ACA	>39.783.ACC	>39.881.ACG	>39.852.ACT	>39.533.AGA	>39.726.AGC	>39.679.AGG	>39.515.AGT	>39.464.ATA	>39.658.ATC	>39.692.ATG	>39.376.ATT	>39.204.CAA	>39.136.CAC	>39.1117.CAG	>39.185.CAT	>39.521.CCA	>39.783.CCC	>39.910.CCG	>39.1014.CCT	>39.992.CGA	>39.869.CGC	>39.1007.CGG	>39.1754.CGT	>39.719.CTA	>39.934.CTC	>39.355.CTG	>39.451.CTT	>39.156.GAA	>39.35.GAC	>39.275.GAG	>39.57.GAT	>39.180.GCA	>39.94.GCC	>39.76.GCG	>39.60.GCT	>39.426.GGA	>39.254.GGC	>39.527.GGG	>39.178.GGT	>39.95.GTA	>39.168.GTC	>39.406.GTG	>39.258.GTT	>39.451.TAA	>39.189.TAC
EIQIRTWFANKRHKIKKS	ESQISDWFRNKRFKIKKS	EVQIMQWFWNKRYKIKKS	EKQIMYWFNNKRWKIKKS	ERQIKNWFNNKRRKIKKS	EKQIKYWFENKRKKIKKS	ENQIPPWFPNKRHKIKKS	EKQIAYWFHNKRVKIKKS	ERQIHYWFANKRHKIKKS	EKQITRWFNNKRVKIKKS	ECQILKWFENKRYKIKKS	EKQIRKWFENKRQKIKKS	ERQIFSWFANKRAKIKKS	ELQIRTWFANKRRKIKKS	EIQITYWFQNKRWKIKKS	EKQIIHWFMNKRAKIKKS	ETQIMYWFQNKRRKIKKS	EGQICMWFRNKRRKIKKS	EVQISNWFWNKRRKIKKS	ELQISCWFSNKRRKIKKS	EMQITYWFQNKRKKIKKS	ESQIMNWFSNKRKKIKKS	EKQIRMWFENKRKKIKKS	ERQIVDWFSNKRKKIKKS	ELQIFNWFANKRRKIKKS	EIQIRYWFGNKRRKIKKS	ERQIYYWFDNKRRKIKKS	EKQISYWFGNKRMKIKKS	EMQISYWFANKRRKIKKS	ETQIRYWFGNKRKKIKKS	EIQITNWFQNKRKKIKKS	ETQILNWFGNKRKKIKKS	EVQINRWFQNKRWKIKKS	EVQIVRWFRNKRWKIKKS	EQQITRWFWNKRYKIKKS	EVQIMCWFRNKRWKIKKS	EGQIARWFQNKRFKIKKS	EKQIITWFKNKRFKIKKS	EVQILTWFKNKRYKIKKS	EHQIMDWFRNKRFKIKKS	ERQIEKWFDNKRYKIKKS	EMQITKWFNNKRQKIKKS	ERQISKWFENKRRKIKKS	EFQITVWFSNKRSKIKKS	ETQIARWFQNKRTKIKKS	EWQISKWFSNKRAKIKKS	ENQINKWFENKRCKIKKS	EVQITRWFGNKRFKIKKS	ERQIATWFANKRAKIKKS	EYQIRIWFSNKRVKIKKS
>40.510.AAA	>40.219.AAC	>40.670.AAG	>40.687.AAT	>40.577.ACA	>40.783.ACC	>40.869.ACG	>40.840.ACT	>40.522.AGA	>40.722.AGC	>40.651.AGG	>40.511.AGT	>40.462.ATA	>40.652.ATC	>40.686.ATG	>40.360.ATT	>40.203.CAA	>40.135.CAC	>40.1116.CAG	>40.185.CAT	>40.518.CCA	>40.780.CCC	>40.903.CCG	>40.995.CCT	>40.981.CGA	>40.866.CGC	>40.993.CGG	>40.1649.CGT	>40.710.CTA	>40.933.CTC	>40.343.CTG	>40.425.CTT	>40.155.GAA	>40.35.GAC	>40.272.GAG	>40.57.GAT	>40.179.GCA	>40.92.GCC	>40.76.GCG	>40.60.GCT	>40.426.GGA	>40.252.GGC	>40.520.GGG	>40.177.GGT	>40.94.GTA	>40.162.GTC	>40.400.GTG	>40.255.GTT	>40.426.TAA	>40.188.TAC
ERQIHYWFVNKRVKIKKS	ERQIGSWFRNKRFKIKKS	ERQIKQWFWNKRFKIKKS	ERQITAWFSNKRFKIKKS	ELQISNWFNNKRRKIKKS	EKQIAMWFANKRKKIKKS	ERQIMYWFDNKRRKIKKS	ERQITGWFHNKRQKIKKS	EKQIRTWFNNKRWKIKKS	ERQIMRWFNNKRVKIKKS	ERQIVKWFENKRAKIKKS	EYQIRKWFENKRWKIKKS	EVQIARWFANKRVKIKKS	EWQIRGWFKNKRYKIKKS	ERQIFYWFQNKRAKIKKS	ERQITVWFQNKRRKIKKS	ELQILYWFQNKRRKIKKS	EAQIAMWFRNKRRKIKKS	EFQISYWFHNKRQKIKKS	EKQIASWFSNKRRKIKKS	EHQITMWFQNKRKKIKKS	EVQITNWFSNKRKKIKKS	EMQIMNWFQNKRKKIKKS	ERQIMDWFANKRKKIKKS	EQQIFHWFANKRRKIKKS	EKQISMWFSNKRVKIKKS	EMQIVHWFENKRRKIKKS	ERQIMHWFSNKRVKIKKS	EKQIVYWFANKRSKIKKS	ESQIMNWFRNKRKKIKKS	ESQITNWFQNKRKKIKKS	ELQIRYWFGNKRAKIKKS	ESQIVRWFQNKRWKIKKS	ERQIERWFRNKRWKIKKS	EKQITRWFWNKRYKIKKS	ESQILTWFRNKRWKIKKS	EEQIGKWFQNKRAKIKKS	EEQIRLWFKNKRWKIKKS	ELQIGDWFRNKRYKIKKS	ERQILDWFRNKRFKIKKS	EVQIAKWFDNKRQKIKKS	ERQIGKWFNNKRCKIKKS	ESQIAKWFENKRTKIKKS	ERQIVKWFSNKRVKIKKS	EKQITRWFANKRAKIKKS	EGQIQKWFRNKRWKIKKS	EFQICRWFENKRYKIKKS	ERQILVWFSNKRYKIKKS	EKQITTWFANKRSKIKKS	ESQIRIWFSNKRAKIKKS
>41.495.AAA	>41.218.AAC	>41.661.AAG	>41.686.AAT	>41.574.ACA	>41.755.ACC	>41.849.ACG	>41.823.ACT	>41.511.AGA	>41.712.AGC	>41.648.AGG	>41.505.AGT	>41.460.ATA	>41.635.ATC	>41.673.ATG	>41.359.ATT	>41.198.CAA	>41.135.CAC	>41.1084.CAG	>41.184.CAT	>41.514.CCA	>41.780.CCC	>41.897.CCG	>41.994.CCT	>41.936.CGA	>41.850.CGC	>41.992.CGG	>41.1635.CGT	>41.704.CTA	>41.929.CTC	>41.334.CTG	>41.423.CTT	>41.155.GAA	>41.35.GAC	>41.263.GAG	>41.56.GAT	>41.176.GCA	>41.90.GCC	>41.74.GCG	>41.60.GCT	>41.424.GGA	>41.239.GGC	>41.507.GGG	>41.177.GGT	>41.94.GTA	>41.160.GTC	>41.382.GTG	>41.253.GTT	>41.422.TAA	>41.186.TAC
EKQIVYWFNNKRFKIKKS	ESQICQWFRNKRFKIKKS	EHQIMQWFWNKRFKIKKS	ELQIRAWFSNKRAKIKKS	ERQIMWWFWNKRRKIKKS	EQQILTWFSNKRKKIKKS	ERQIRDWFHNKRTKIKKS	EVQIKNWFQNKRKKIKKS	EVQIQRWFWNKRYKIKKS	ERQIMGWFRNKRAKIKKS	EKQIEKWFENKRYKIKKS	ELQIKKWFENKRWKIKKS	EIQIVYWFRNKRSKIKKS	ERQISRWFRNKRPKIKKS	EVQIRLWFMNKRGKIKKS	EVQIKVWFQNKRAKIKKS	EMQIMYWFQNKRRKIKKS	EIQIAMWFRNKRRKIKKS	ERQISWWFWNKRRKIKKS	EVQIRDWFSNKRRKIKKS	ERQINDWFANKRKKIKKS	ERQIGTWFSNKRKKIKKS	ERQIMYWFENKRKKIKKS	ERQISDWFSNKRKKIKKS	ENQIFYWFANKRAKIKKS	ESQITCWFSNKRRKIKKS	EQQIARWFENKRRKIKKS	EQQICNWFSNKRRKIKKS	ESQIFYWFSNKRRKIKKS	ELQIMNWFSNKRKKIKKS	ELQITYWFQNKRKKIKKS	ELQIAWWFGNKRKKIKKS	EEQIMRWFQNKRWKIKKS	EQQIQRWFRNKRWKIKKS	EKQITVWFWNKRYKIKKS	ERQIRLWFSNKRYKIKKS	EGQIHNWFRNKRMKIKKS	EVQIRVWFKNKRFKIKKS	EPQILDWFRNKRYKIKKS	EAQILDWFRNKRYKIKKS	EFQISKWFDNKRYKIKKS	EEQILKWFENKRSKIKKS	ERQIAKWFENKRRKIKKS	EKQIVKWFNNKRCKIKKS	EKQICKWFQNKRMKIKKS	EYQIQRWFANKRFKIKKS	EMQIVKWFENKRWKIKKS	ELQIMRWFANKRYKIKKS	EKQIAIWFSNKRAKIKKS	EEQIRVWFSNKRSKIKKS
>42.480.AAA	>42.217.AAC	>42.661.AAG	>42.686.AAT	>42.561.ACA	>42.733.ACC	>42.843.ACG	>42.823.ACT	>42.504.AGA	>42.710.AGC	>42.622.AGG	>42.503.AGT	>42.459.ATA	>42.606.ATC	>42.664.ATG	>42.351.ATT	>42.196.CAA	>42.133.CAC	>42.1070.CAG	>42.183.CAT	>42.502.CCA	>42.771.CCC	>42.896.CCG	>42.959.CCT	>42.907.CGA	>42.838.CGC	>42.949.CGG	>42.1603.CGT	>42.693.CTA	>42.921.CTC	>42.296.CTG	>42.417.CTT	>42.154.GAA	>42.34.GAC	>42.256.GAG	>42.55.GAT	>42.175.GCA	>42.88.GCC	>42.74.GCG	>42.59.GCT	>42.420.GGA	>42.236.GGC	>42.504.GGG	>42.176.GGT	>42.94.GTA	>42.160.GTC	>42.361.GTG	>42.245.GTT	>42.422.TAA	>42.184.TAC
ERQIHYWFANKRHKIKKS	EMQINAWFRNKRFKIKKS	ERQILQWFWNKRHKIKKS	EKQISQWFVNKRFKIKKS	EKQISQWFVNKRRKIKKS	READRRVVPQKRGKIKKS	EFQIQAWFKNKRYKIKKS	EKQIAAWFHNKRMKIKKS	ESQIFRWFANKRHKIKKS	ETQISRWFNNKRVKIKKS	ERQIMKWFENKRYKIKKS	EYQIAWWFKNKRTKIKKS	EKQITYWFNNKRVKIKKS	EQQISPWFRNKRRKIKKS	ESQIWDWFRNKRYKIKKS	EKQIKVWFQNKRAKIKKS	ELQIHYWFANKRRKIKKS	EMQIAMWFRNKRRKIKKS	EKQISWWFWNKRRKIKKS	EKQIEYWFSNKRRKIKKS	ENQIANWFSNKRKKIKKS	ELQISYWFSNKRKKIKKS	ESQIINWFANKRKKIKKS	EVQIMDWFSNKRKKIKKS	EVQIFNWFANKRRKIKKS	ERQILMWFNNKRRKIKKS	EIQITHWFENKRRKIKKS	EKQIANWFSNKRRKIKKS	EMQIFHWFANKRKKIKKS	EEQIRNWFSNKRKKIKKS	EKQIMFWFQNKRKKIKKS	EVQIGYWFANKRKKIKKS	EVQIFNWFKNKRWKIKKS	EVQIERWFRNKRFKIKKS	ETQIMTWFWNKRYKIKKS	ENQIGRWFLNKRYKIKKS	EAQIGRWFQNKRAKIKKS	EHQIRVWFKNKRFKIKKS	ERQICDWFRNKRFKIKKS	ERQIVNWFRNKRYKIKKS	EYQIFKWFANKRWKIKKS	ELQIAKWFNNKRFKIKKS	EVQIMKWFENKRRKIKKS	ESQILKWFDNKRAKIKKS	ESQIFNWFRNKRTKIKKS	EYQIRRWFANKRAKIKKS	ERQIQRWFENKRFKIKKS	ETQIKLWFRNKRYKIKKS	ERQISIWFVNKRAKIKKS	EQQIRLWFSNKRYKIKKS
>43.478.AAA	>43.217.AAC	>43.649.AAG	>43.664.AAT	>43.556.ACA	>43.728.ACC	>43.779.ACG	>43.813.ACT	>43.502.AGA	>43.702.AGC	>43.620.AGG	>43.501.AGT	>43.456.ATA	>43.576.ATC	>43.661.ATG	>43.348.ATT	>43.195.CAA	>43.130.CAC	>43.1058.CAG	>43.183.CAT	>43.500.CCA	>43.760.CCC	>43.896.CCG	>43.931.CCT	>43.903.CGA	>43.836.CGC	>43.933.CGG	>43.1579.CGT	>43.683.CTA	>43.869.CTC	>43.296.CTG	>43.415.CTT	>43.154.GAA	>43.34.GAC	>43.255.GAG	>43.55.GAT	>43.168.GCA	>43.87.GCC	>43.73.GCG	>43.59.GCT	>43.417.GGA	>43.224.GGC	>43.503.GGG	>43.174.GGT	>43.94.GTA	>43.156.GTC	>43.359.GTG	>43.242.GTT	>43.398.TAA	>43.182.TAC
ERQIASWFSNKRHKIKKS	ETQIAVWFRNKRHKIKKS	EKQISQWFWNKRHKIKKS	EKQILSWFSNKRFKIKKS	EKQIMAWFHNKRSKIKKS	ESQIKGWFSNKRKKIKKS	EKQIRHWFSNKRSKIKKS	ERQIKYWFENKRRKIKKS	EEQIFRWFANKRHKIKKS	_TRIFGWFFNKRHKIKKS	EEQISKWFENKRYKIKKS	EGQIVKWFENKRFKIKKS	ERQIVYWFQNKRVKIKKS	EQQIASWFANKREKIKKS	ERQIIFWFQNKRSKIKKS	ERQIVVWFQNKRSKIKKS	ELQIHYWFCNKRRKIKKS	EKQIGQWFRNKRRKIKKS	EKQIKYWFWNKRRKIKKS	EKQIADWFSNKRRKIKKS	EQQISTWFANKRKKIKKS	EKQIAYWFSNKRKKIKKS	EVQITNWFGNKRKKIKKS	ERQIADWFSNKRKKIKKS	ERQIGFWFQNKRAKIKKS	EAQIVNWFSNKRRKIKKS	EVQIRRWFENKRRKIKKS	EVQITNWFSNKRVKIKKS	EKQITLWFQNKRKKIKKS	ESQINNWFRNKRKKIKKS	EKQIENWFQNKRKKIKKS	EFQIIYWFGNKRKKIKKS	EVQIARWFQNKRWKIKKS	EEQIIRWFRNKRWKIKKS	EMQIARWFWNKRYKIKKS	EQQILVWFRNKRWKIKKS	EAQISKWFQNKRRKIKKS	ELQIRLWFKNKRYKIKKS	EKQIDDWFRNKRYKIKKS	ERQITDWFRNKRFKIKKS	EMQIFRWFANKRFKIKKS	EFQICTWFLNKRPKIKKS	ETQISKWFENKRRKIKKS	ERQIGKWFSNKRLKIKKS	ERQIGRWFQNKRLKIKKS	EYQIGKWFRNKRAKIKKS	ERQICKWFENKRHKIKKS	EKQILAWFANKRFKIKKS	ERQIITWFQNKRAKIKKS	ENQIRVWFSNKRVKIKKS
>44.472.AAA	>44.216.AAC	>44.643.AAG	>44.634.AAT	>44.554.ACA	>44.726.ACC	>44.758.ACG	>44.804.ACT	>44.497.AGA	>44.697.AGC	>44.619.AGG	>44.495.AGT	>44.455.ATA	>44.560.ATC	>44.647.ATG	>44.339.ATT	>44.194.CAA	>44.130.CAC	>44.1053.CAG	>44.179.CAT	>44.481.CCA	>44.759.CCC	>44.889.CCG	>44.910.CCT	>44.894.CGA	>44.800.CGC	>44.929.CGG	>44.1532.CGT	>44.680.CTA	>44.832.CTC	>44.296.CTG	>44.412.CTT	>44.152.GAA	>44.33.GAC	>44.252.GAG	>44.55.GAT	>44.167.GCA	>44.87.GCC	>44.72.GCG	>44.58.GCT	>44.402.GGA	>44.223.GGC	>44.497.GGG	>44.173.GGT	>44.93.GTA	>44.154.GTC	>44.320.GTG	>44.237.GTT	>44.397.TAA	>44.182.TAC
ERQISNWFANKRFKIKKS	EPQISTWFRNKRFKIKKS	EKQIAQWFWNKRWKIKKS	ETQISSWFSNKRFKIKKS	EAQISNWFHNKRTKIKKS	EVQIKNWFQNKRKKIKKS	ETQIRNWFDNKRRKIKKS	EGQIAGWFLNKRRKIKKS	ELQIFRWFANKRHKIKKS	EKQILMWFKNKRLKIKKS	EVQIRKWFENKRYKIKKS	EKQIAKWFENKRCKIKKS	EKQIHSWFANKRWKIKKS	ERQIRMWFNNKRFKIKKS	EKQILTWFQNKRMKIKKS	EKQIIVWFQNKRSKIKKS	EVQIAQWFANKRRKIKKS	ELQIVYWFSNKRRKIKKS	EIQIAMWFWNKRRKIKKS	EEQIAQWFSNKRRKIKKS	EVQISNWFGNKRKKIKKS	EMQIMTWFSNKRKKIKKS	EQQISNWFWNKRKKIKKS	EVQILNWFSNKRKKIKKS	EQQIAHWFQNKRAKIKKS	ERQIGYWFNNKRRKIKKS	ETQIRYWFENKRRKIKKS	EKQIMDWFSNKRRKIKKS	EMQIFNWFANKRKKIKKS	EIQITYWFSNKRKKIKKS	ERQIRYWFENKRKKIKKS	ETQIANWFGNKRRKIKKS	EKQIERWFQNKRWKIKKS	EVQIERWFRNKRFKIKKS	EGQIMQWFWNKRYKIKKS	ESQISRWFLNKRYKIKKS	ERQIHDWFRNKRAKIKKS	EKQITLWFKNKRFKIKKS	EYQIADWFRNKRYKIKKS	EKQIQDWFRNKRFKIKKS	ETQISKWFDNKRQKIKKS	EKQIGKWFSNKRMKIKKS	ERQIAKWFENKRRKIKKS	EQQIKKWFDNKRQKIKKS	ERQISRWFQNKRVKIKKS	EVQILKWFRNKRWKIKKS	EYQIIKWFENKRFKIKKS	ELQIRRWFGNKRYKIKKS	ERQITVWFRNKRSKIKKS	EEQIRVWFSNKRVKIKKS
>45.468.AAA	>45.214.AAC	>45.632.AAG	>45.609.AAT	>45.549.ACA	>45.724.ACC	>45.735.ACG	>45.796.ACT	>45.497.AGA	>45.681.AGC	>45.618.AGG	>45.494.AGT	>45.454.ATA	>45.557.ATC	>45.646.ATG	>45.337.ATT	>45.194.CAA	>45.126.CAC	>45.1044.CAG	>45.179.CAT	>45.475.CCA	>45.750.CCC	>45.823.CCG	>45.839.CCT	>45.878.CGA	>45.796.CGC	>45.928.CGG	>45.1520.CGT	>45.669.CTA	>45.822.CTC	>45.232.CTG	>45.408.CTT	>45.151.GAA	>45.33.GAC	>45.248.GAG	>45.55.GAT	>45.163.GCA	>45.86.GCC	>45.70.GCG	>45.57.GCT	>45.399.GGA	>45.220.GGC	>45.484.GGG	>45.172.GGT	>45.92.GTA	>45.146.GTC	>45.291.GTG	>45.230.GTT	>45.392.TAA	>45.182.TAC
EKQIYYWFVNKRSKIKKS	ESQIAGWFRNKRHKIKKS	ERQISQWFWNKRFKIKKS	ETQISQWFTNKRHKIKKS	EMQIHWWFTNKRRKIKKS	EKQILAWFHNKRMKIKKS	EEQIRNWFENKRRKIKKS	EHQILNWFHNKRMKIKKS	ETQIFRWFANKRRKIKKS	EKQIRQWFGNKRTKIKKS	EWQIM_WFRNKRNKIKKS	EKQIRKWFENKRAKIKKS	ERQIHSWFANKRWKIKKS	EVQIGRWFHNKRVKIKKS	ERQICTWFQNKRDKIKKS	ERQIIVWFQNKRAKIKKS	EVQIFWWFANKRRKIKKS	EPQIAMWFRNKRRKIKKS	EKQITFWFVNKRYKIKKS	EGQISNWFSNKRRKIKKS	EVQILYWFQNKRKKIKKS	ELQIAYWFSNKRKKIKKS	EVQIQYWFENKRKKIKKS	EFQIANWFSNKRKKIKKS	EKQITYWFQNKRMKIKKS	EKQIKTWFNNKRKKIKKS	ERQIMFWFENKRRKIKKS	ESQIVNWFSNKRRKIKKS	ELQITYWFSNKRKKIKKS	EIQISYWFSNKRKKIKKS	ECQIMYWFQNKRKKIKKS	EVQITYWFGNKRKKIKKS	EKQIRRWFQNKRWKIKKS	EKQIERWFRNKRWKIKKS	EQQIKRWFWNKRYKIKKS	EVQIMVWFRNKRFKIKKS	ESQIVRWFQNKRFKIKKS	EQQIRIWFKNKRFKIKKS	ERQIDDWFRNKRFKIKKS	EVQIVRWFKNKRYKIKKS	EMQIKKWFDNKRQKIKKS	ELQIVKWFSNKRFKIKKS	ERQISKWFENKRGKIKKS	EVQILKWFDNKRQKIKKS	EVQITRWFQNKRRKIKKS	EGQIGKWFRNKRSKIKKS	EAQITRWFENKRYKIKKS	ERQIAKWFANKRYKIKKS	ELQISTWFANKRAKIKKS	EEQIRLWFSNKRYKIKKS
>46.466.AAA	>46.214.AAC	>46.630.AAG	>46.606.AAT	>46.542.ACA	>46.718.ACC	>46.714.ACG	>46.793.ACT	>46.496.AGA	>46.674.AGC	>46.616.AGG	>46.493.AGT	>46.453.ATA	>46.551.ATC	>46.641.ATG	>46.333.ATT	>46.193.CAA	>46.126.CAC	>46.1042.CAG	>46.177.CAT	>46.462.CCA	>46.730.CCC	>46.812.CCG	>46.810.CCT	>46.861.CGA	>46.792.CGC	>46.919.CGG	>46.1427.CGT	>46.654.CTA	>46.778.CTC	>46.224.CTG	>46.407.CTT	>46.151.GAA	>46.33.GAC	>46.245.GAG	>46.54.GAT	>46.158.GCA	>46.85.GCC	>46.67.GCG	>46.57.GCT	>46.377.GGA	>46.211.GGC	>46.474.GGG	>46.171.GGT	>46.91.GTA	>46.141.GTC	>46.285.GTG	>46.230.GTT	>46.377.TAA	>46.181.TAC
EVQIATWFSNKRHKIKKS	ERQIGIWFRNKRFKIKKS	EAQIKQWFWNKRFKIKKS	ERQIIAWFSNKRFKIKKS	ETQIKWWFWNKRRKIKKS	EKQIIYWFENKRKKIKKS	ERQIRLWFENKRRKIKKS	EKQISSWFHNKRMKIKKS	ETQIFRWFANKRRKIKKS	EGQIKRWFSNKRSKIKKS	EVQIAKWFENKRSKIKKS	ERQISKWFENKRFKIKKS	ERQINYWFVNKRNKIKKS	EHQIGMWFLNKREKIKKS	ERQIMYWFQNKRWKIKKS	ERQIKVWFQNKRGKIKKS	EMQIFNWFSNKRRKIKKS	ELQIQYWFSNKRRKIKKS	EKQINWWFWNKRRKIKKS	EMQIASWFSNKRRKIKKS	ETQILNWFANKRKKIKKS	EKQISNWFSNKRKKIKKS	EKQITYWFENKRRKIKKS	ENQIINWFSNKRKKIKKS	ENQIFYWFANKRVKIKKS	EAQICYWFSNKRRKIKKS	EKQISRWFENKRRKIKKS	ERQIYYWFNNKRKKIKKS	ELQISYWFANKRKKIKKS	EMQIMNWFKNKRKKIKKS	ETQITNWFQNKRKKIKKS	ERQIMDWFSNKRKKIKKS	EEQIMRWFQNKRWKIKKS	EVQIERWFRNKRFKIKKS	ESQINRWFWNKRYKIKKS	ETQIQRWFINKRYKIKKS	EGQILRWFQNKRRKIKKS	EDQIRVWFKNKRFKIKKS	ERQILDWFRNKRYKIKKS	ETQIKCWFKNKRWKIKKS	ERQIGKWFSNKREKIKKS	ETQITKWFSNKRQKIKKS	EIQINKWFENKRRKIKKS	ERQIAKWFDNKRVKIKKS	EMQIARWFQNKRGKIKKS	EGQILKWFRNKRFKIKKS	EYQIARWFENKRFKIKKS	EVQISRWFANKRFKIKKS	ERQILVWFANKRSKIKKS	EEQIRVWFSNKRVKIKKS
>47.465.AAA	>47.208.AAC	>47.620.AAG	>47.602.AAT	>47.539.ACA	>47.713.ACC	>47.686.ACG	>47.791.ACT	>47.480.AGA	>47.663.AGC	>47.613.AGG	>47.488.AGT	>47.450.ATA	>47.546.ATC	>47.633.ATG	>47.323.ATT	>47.191.CAA	>47.125.CAC	>47.1037.CAG	>47.176.CAT	>47.460.CCA	>47.730.CCC	>47.808.CCG	>47.799.CCT	>47.860.CGA	>47.788.CGC	>47.915.CGG	>47.1401.CGT	>47.641.CTA	>47.716.CTC	>47.218.CTG	>47.402.CTT	>47.150.GAA	>47.32.GAC	>47.244.GAG	>47.54.GAT	>47.154.GCA	>47.81.GCC	>47.67.GCG	>47.56.GCT	>47.369.GGA	>47.210.GGC	>47.453.GGG	>47.170.GGT	>47.91.GTA	>47.136.GTC	>47.281.GTG	>47.228.GTT	>47.368.TAA	>47.180.TAC
EKQILSWFANKRHKIKKS	ERQIVSWFRNKRFKIKKS	ERQIMAWFWNKRFKIKKS	EMQIASWFSNKRHKIKKS	EKQIYNWFNNKRRKIKKS	ERQISAWFKNKRTKIKKS	ERQIRYWFDNKRRKIKKS	ESQIKYWFENKRRKIKKS	EQQIFRWFANKRRKIKKS	ERQIKDWFRNKRQKIKKS	ELQISKWFENKRYKIKKS	ERQIRKWFENKRWKIKKS	ENQIPYWFANKRRKIKKS	ETQIRMWFANKRFKIKKS	EVQITYWFQNKRHKIKKS	ERQIVVWFQNKRQKIKKS	EVQIAMWFANKRRKIKKS	EEQIAMWFRNKRRKIKKS	EHQIILWFSNKRGKIKKS	ERQISNWFSNKRRKIKKS	EAQIVTWFQNKRKKIKKS	ENQIANWFSNKRKKIKKS	EIQITNWFQNKRKKIKKS	ELQIMNWFGNKRKKIKKS	ERQIFYWFANKRSKIKKS	EGQIAMWFNNKRRKIKKS	ENQISHWFENKRRKIKKS	ERQISNWFSNKRRKIKKS	ELQISMWFANKRKKIKKS	ETQIMYWFGNKRKKIKKS	ELQIRDWFQNKRNKIKKS	ETQICNWFGNKRRKIKKS	EKQIVRWFQNKRWKIKKS	EFQISRWFRNKRWKIKKS	EAQISRWFWNKRYKIKKS	ERQINVWFRNKRWKIKKS	EQQILKWFQNKRQKIKKS	ESQIRLWFKNKRYKIKKS	EGQISDWFRNKRYKIKKS	EKQICDWFRNKRMKIKKS	EMQISKWFDNKRFKIKKS	ERQIGKWFSNKRVKIKKS	ESQIAKWFENKRMKIKKS	EGQISKWFNNKRMKIKKS	EGQILRWFQNKRMKIKKS	EVQIQKWFRNKRFKIKKS	ERQISKWFENKRCKIKKS	ELQIKRWFANKRFKIKKS	ELQITTWFANKRAKIKKS	EEQIRVWFSNKRVKIKKS
>48.464.AAA	>48.206.AAC	>48.616.AAG	>48.602.AAT	>48.525.ACA	>48.710.ACC	>48.667.ACG	>48.769.ACT	>48.472.AGA	>48.662.AGC	>48.606.AGG	>48.487.AGT	>48.446.ATA	>48.529.ATC	>48.632.ATG	>48.323.ATT	>48.187.CAA	>48.124.CAC	>48.1037.CAG	>48.172.CAT	>48.446.CCA	>48.720.CCC	>48.785.CCG	>48.739.CCT	>48.851.CGA	>48.780.CGC	>48.909.CGG	>48.1398.CGT	>48.639.CTA	>48.666.CTC	>48.195.CTG	>48.398.CTT	>48.150.GAA	>48.32.GAC	>48.241.GAG	>48.54.GAT	>48.151.GCA	>48.81.GCC	>48.66.GCG	>48.56.GCT	>48.357.GGA	>48.206.GGC	>48.436.GGG	>48.169.GGT	>48.91.GTA	>48.134.GTC	>48.276.GTG	>48.227.GTT	>48.363.TAA	>48.178.TAC
EKQIIYWFVNKRAKIKKS	ERQILTWFRNKRFKIKKS	EVQISQWFWNKRHKIKKS	ERQIATWFTNKRFKIKKS	ERQIYDWFNNKRRKIKKS	EKQIVYWFHNKREKIKKS	EKQIKAWFKNKRAKIKKS	ESQISSWFHNKRMKIKKS	ELQITYWFANKRWKIKKS	ERQIAMWFSNKRVKIKKS	ERQILKWFENKRRKIKKS	EKQIKKWFMNKRWKIKKS	ESQIRWWFNNKRAKIKKS	EMQITYWFRNKRNKIKKS	ERQIAHWFSNKRSKIKKS	EQQIRHWFQNKRAKIKKS	EMQIAMWFQNKRRKIKKS	EKQISMWFRNKRRKIKKS	EAQIKFWFWNKRRKIKKS	ESQIQNWFGNKRRKIKKS	ELQIHNWFANKRKKIKKS	EQQILCWFSNKRKKIKKS	ELQIINWFQNKRKKIKKS	ESQIGNWFSNKRKKIKKS	ESQIAHWFANKRRKIKKS	EAQIINWFSNKRRKIKKS	EEQIRRWFENKRRKIKKS	ERQILTWFNNKRKKIKKS	ESQIFNWFANKRKKIKKS	ETQIANWFGNKRKKIKKS	EVQIVYWFWNKRKKIKKS	EKQILNWFGNKRSKIKKS	EVQIVRWFQNKRHKIKKS	EPQIVRWFRNKRWKIKKS	ERQISTWFWNKRYKIKKS	ERQIRLWFSNKRYKIKKS	ETQILRWFQNKRFKIKKS	EQQIRVWFKNKRFKIKKS	EPQIGDWFRNKRYKIKKS	EKQIGNWFRNKRFKIKKS	ERQINKWFDNKRRKIKKS	ERQIAKWFNNKRSKIKKS	EVQIQKWFENKRRKIKKS	EYQIAKWFDNKRQKIKKS	EGQICRWFQNKRLKIKKS	ERQIIRWFGNKRYKIKKS	ERQIMRWFENKRFKIKKS	ESQIRVWFSNKRYKIKKS	EKQIMLWFANKRAKIKKS	EVQIRIWFSNKRAKIKKS
>49.463.AAA	>49.206.AAC	>49.613.AAG	>49.591.AAT	>49.522.ACA	>49.698.ACC	>49.666.ACG	>49.761.ACT	>49.467.AGA	>49.662.AGC	>49.603.AGG	>49.484.AGT	>49.446.ATA	>49.518.ATC	>49.624.ATG	>49.319.ATT	>49.181.CAA	>49.123.CAC	>49.1033.CAG	>49.171.CAT	>49.443.CCA	>49.716.CCC	>49.773.CCG	>49.732.CCT	>49.836.CGA	>49.775.CGC	>49.854.CGG	>49.1346.CGT	>49.626.CTA	>49.593.CTC	>49.181.CTG	>49.391.CTT	>49.149.GAA	>49.32.GAC	>49.240.GAG	>49.54.GAT	>49.149.GCA	>49.79.GCC	>49.66.GCG	>49.56.GCT	>49.353.GGA	>49.205.GGC	>49.419.GGG	>49.163.GGT	>49.90.GTA	>49.134.GTC	>49.269.GTG	>49.223.GTT	>49.359.TAA	>49.177.TAC
EVQITYWFANKRHKIKKS	ELQIGQWFRNKRFKIKKS	EKQIMQWFWNKRFKIKKS	ERQINSWFSNKRFKIKKS	ERQIKDWFNNKRRKIKKS	EKQIQCWFHNKRTKIKKS	EEQIKNWFENKRRKIKKS	EQQIGAWFGNKRRKIKKS	ETQIKSWFNNKRYKIKKS	EGQIRDWFRNKRMKIKKS	EMQISKWFENKRYKIKKS	EPQIRKWFENKRYKIKKS	ENQIRYWFVNKRAKIKKS	EMQIDMWFKNKRHKIKKS	ELQIRTWFANKRWKIKKS	ELQILVWFGNKRLKIKKS	EKQIAQWFANKRRKIKKS	EEQIRMWFSNKRRKIKKS	ESQISCWFWNKRRKIKKS	EQQIVNWFSNKRRKIKKS	EIQISNWFANKRKKIKKS	ELQIMYWFSNKRKKIKKS	EGQIINWFQNKRKKIKKS	EKQILTWFSNKRKKIKKS	EQQIAYWFANKRMKIKKS	ERQIANWFSNKRRKIKKS	ERQISHWFENKRRKIKKS	EIQISYWFGNKRRKIKKS	EKQIMFWFQNKRKKIKKS	EKQIAYWFSNKRKKIKKS	ERQIVMWFENKRKKIKKS	ETQILYWFGNKRRKIKKS	ERQINRWFQNKRWKIKKS	EAQIIRWFRNKRWKIKKS	EKQISAWFWNKRYKIKKS	ELQIMVWFRNKRWKIKKS	ERQILKWFQNKRLKIKKS	ERQIYVWFKNKRYKIKKS	EKQILDWFRNKRFKIKKS	EGQIVVWFKNKRYKIKKS	ENQIFRWFANKRWKIKKS	EVQITKWFNNKRCKIKKS	EAQIMKWFENKRSKIKKS	ERQISKWFDNKRVKIKKS	EKQIGRWFQNKRLKIKKS	EVQILKWFRNKRWKIKKS	EWQIRIWFQNKRYKIKKS	ESQIYHWFKNKRFKIKKS	EVQITVWFANKRAKIKKS	EEQIRIWFSNKRSKIKKS
>50.462.AAA	>50.203.AAC	>50.590.AAG	>50.575.AAT	>50.511.ACA	>50.693.ACC	>50.666.ACG	>50.753.ACT	>50.466.AGA	>50.646.AGC	>50.596.AGG	>50.482.AGT	>50.442.ATA	>50.512.ATC	>50.613.ATG	>50.319.ATT	>50.181.CAA	>50.123.CAC	>50.1020.CAG	>50.170.CAT	>50.437.CCA	>50.715.CCC	>50.767.CCG	>50.728.CCT	>50.823.CGA	>50.753.CGC	>50.849.CGG	>50.1343.CGT	>50.621.CTA	>50.581.CTC	>50.180.CTG	>50.390.CTT	>50.148.GAA	>50.32.GAC	>50.234.GAG	>50.54.GAT	>50.146.GCA	>50.76.GCC	>50.65.GCG	>50.56.GCT	>50.340.GGA	>50.200.GGC	>50.414.GGG	>50.161.GGT	>50.90.GTA	>50.131.GTC	>50.264.GTG	>50.218.GTT	>50.355.TAA	>50.177.TAC
EMQISTWFANKRFKIKKS	EIQIASWFRNKRHKIKKS	ERQILQWFWNKRFKIKKS	ETQISQWFANKRFKIKKS	ERQILTWFQNKRRKIKKS	EVQIMTWFSNKRKKIKKS	EQQISCWFANKRMKIKKS	EGQILWWFPNKRLKIKKS	EKQIFRWFANKRWKIKKS	EKQILQWFSNKRVKIKKS	ERQILKWFENKRRKIKKS	EKQIRKWFENKRSKIKKS	EEQISYWFVNKRTKIKKS	EWQIRMWFANKRFKIKKS	EEQIRMWFQNKRQKIKKS	ERQITFWFQNKRQKIKKS	ELQIHHWFANKRRKIKKS	EAQIAMWFRNKRRKIKKS	ENQIMDWFNNKRRKIKKS	EVQIGQWFSNKRRKIKKS	EKQILTWFQNKRKKIKKS	EMQITNWFSNKRKKIKKS	ERQISDWFQNKRKKIKKS	ELQINNWFSNKRKKIKKS	ELQITYWFSNKRSKIKKS	EPQIVMWFSNKRRKIKKS	EGQIRRWFENKRRKIKKS	ERQIAYWFGNKRMKIKKS	ESQIRYWFSNKRKKIKKS	ERQISMWFSNKRKKIKKS	ETQIRDWFQNKRNKIKKS	ESQISMWFANKRRKIKKS	EVQISKWFQNKRWKIKKS	EGQITRWFRNKRFKIKKS	EKQIQTWFWNKRYKIKKS	EVQISRWFLNKRYKIKKS	EPQIQRWFQNKRAKIKKS	ERQIVCWFKNKRFKIKKS	ERQIYTWFKNKRYKIKKS	EPQIQDWFRNKRYKIKKS	ENQIAKWFDNKRWKIKKS	EYQIAKWFNNKRTKIKKS	EKQISKWFENKRRKIKKS	EKQILKWFDNKRWKIKKS	EYQILKWFQNKRQKIKKS	ESQITRWFGNKRFKIKKS	ELQITRWFENKRFKIKKS	ESQIRVWFANKRYKIKKS	ERQILNWFSNKRSKIKKS	EEQIRVWFSNKRSKIKKS
>51.461.AAA	>51.202.AAC	>51.581.AAG	>51.571.AAT	>51.504.ACA	>51.693.ACC	>51.647.ACG	>51.744.ACT	>51.466.AGA	>51.607.AGC	>51.593.AGG	>51.475.AGT	>51.439.ATA	>51.512.ATC	>51.591.ATG	>51.316.ATT	>51.181.CAA	>51.121.CAC	>51.995.CAG	>51.169.CAT	>51.431.CCA	>51.712.CCC	>51.758.CCG	>51.720.CCT	>51.821.CGA	>51.750.CGC	>51.823.CGG	>51.1327.CGT	>51.617.CTA	>51.568.CTC	>51.178.CTG	>51.387.CTT	>51.146.GAA	>51.32.GAC	>51.233.GAG	>51.52.GAT	>51.144.GCA	>51.75.GCC	>51.65.GCG	>51.55.GCT	>51.337.GGA	>51.196.GGC	>51.408.GGG	>51.160.GGT	>51.90.GTA	>51.127.GTC	>51.253.GTG	>51.217.GTT	>51.352.TAA	>51.176.TAC
ELQIYYWFVNKRHKIKKS	EKQISAWFRNKRFKIKKS	EQQIMQWFWNKRWKIKKS	ERQISSWFSNKRFKIKKS	ERQIRDWFCNKRRKIKKS	EKQIINWFHNKREKIKKS	ENQIRWWFDNKRRKIKKS	EVQIKNWFENKRKKIKKS	ERQISLWFLNKRWKIKKS	ERQISRWFNNKRVKIKKS	EKQIMKWFENKRLKIKKS	EKQIRKWFENKRWKIKKS	EQQIMRWFANKRVKIKKS	EGQIRPWFYNKRGKIKKS	EKQIMYWFQNKRWKIKKS	ERQIVVWFQNKRTKIKKS	EVQIFNWFSNKRRKIKKS	ERQIMCWFSNKRRKIKKS	ELQISWWFWNKRRKIKKS	EMQINNWFSNKRRKIKKS	EQQIHNWFSNKRKKIKKS	ECQIANWFSNKRKKIKKS	EKQIIYWFENKRRKIKKS	EMQISNWFSNKRKKIKKS	ESQIHNWFSNKRRKIKKS	EVQIRNWFSNKRAKIKKS	EVQIIHWFENKRRKIKKS	EVQIKDWFSNKRRKIKKS	EKQINTWFQNKRKKIKKS	EKQIMDWFKNKRKKIKKS	ERQIKEWFRNKRGKIKKS	ECQIVFWFGNKRRKIKKS	EEQIVRWFQNKRWKIKKS	EVQIYRWFRNKRYKIKKS	EKQIVRWFWNKRYKIKKS	EQQIKIWFSNKRYKIKKS	ETQITRWFQNKRRKIKKS	EVQIKIWFKNKRFKIKKS	EMQISTWFKNKREKIKKS	EIQIVMWFKNKRYKIKKS	EKQINKWFDNKRMKIKKS	EAQITKWFNNKRQKIKKS	ESQILKWFENKRRKIKKS	EQQIMKWFNNKRMKIKKS	ERQINRWFQNKRVKIKKS	ESQIAKWFRNKRFKIKKS	EVQIAKWFENKRFKIKKS	ERQILQWFSNKRFKIKKS	EWQI_MWFGNKRVKIKKS	EYQIRVWFSNKRAKIKKS
>52.460.AAA	>52.201.AAC	>52.566.AAG	>52.566.AAT	>52.503.ACA	>52.660.ACC	>52.603.ACG	>52.741.ACT	>52.465.AGA	>52.599.AGC	>52.572.AGG	>52.466.AGT	>52.438.ATA	>52.510.ATC	>52.584.ATG	>52.316.ATT	>52.179.CAA	>52.121.CAC	>52.980.CAG	>52.168.CAT	>52.419.CCA	>52.703.CCC	>52.756.CCG	>52.712.CCT	>52.784.CGA	>52.749.CGC	>52.762.CGG	>52.1288.CGT	>52.586.CTA	>52.534.CTC	>52.167.CTG	>52.380.CTT	>52.146.GAA	>52.32.GAC	>52.232.GAG	>52.52.GAT	>52.137.GCA	>52.75.GCC	>52.65.GCG	>52.55.GCT	>52.332.GGA	>52.187.GGC	>52.408.GGG	>52.159.GGT	>52.90.GTA	>52.126.GTC	>52.250.GTG	>52.217.GTT	>52.351.TAA	>52.176.TAC
ERQICMWFYNKR_KIKKS	EMQISSWFRNKRFKIKKS	EGQIMQWFWNKRHKIKKS	ERQIGSWFSNKRHKIKKS	ESQISSWFHNKRTKIKKS	EGQIFAWFSNKRSKIKKS	ERQISEWFCNKRVKIKKS	EWQIVTWFKNKRLKIKKS	EKQIKYWFNNKRWKIKKS	EQQIRMWFSNKRVKIKKS	ESQISKWFENKRYKIKKS	EMQIKKWFENKRWKIKKS	ERQIFHWFANKRNKIKKS	EGQICRWFSNKRMKIKKS	EKQIIYWFQNKRWKIKKS	ERQIIVWFQNKRAKIKKS	EAQIMFWFQNKRRKIKKS	EVQILQWFSNKRRKIKKS	ETQISHWFWNKRRKIKKS	ERQIRDWFSNKRRKIKKS	EKQIMMWFQNKRKKIKKS	EKQISMWFSNKRKKIKKS	ERQIINWFENKRKKIKKS	ETQITNWFGNKRKKIKKS	ENQIHHWFSNKRRKIKKS	ERQILMWFSNKRRKIKKS	ETQIAHWFENKRRKIKKS	ETQISNWFSNKRRKIKKS	EKQISYWFSNKRKKIKKS	EMQIYWWFQNKRKKIKKS	EKQIVYWFQNKRRKIKKS	EGQIANWFSNKRRKIKKS	EPQIFHWFKNKRFKIKKS	EMQITRWFRNKRWKIKKS	EQQINQWFWNKRYKIKKS	EGQIMVWFRNKRYKIKKS	ETQILRWFQNKRQKIKKS	EKQITLWFKNKRYKIKKS	EQQIMDWFRNKRYKIKKS	EGQIGRWFKNKRFKIKKS	EKQISKWFDNKRFKIKKS	ERQICKWFNNKRCKIKKS	EKQILKWFENKRSKIKKS	ERQIIRWFDNKRQKIKKS	ELQINRWFQNKRLKIKKS	ERQIAKWFRNKRQKIKKS	ECQIIRWFENKRYKIKKS	EAQISKWFSNKRNKIKKS	ERQITLWFRNKRAKIKKS	EEQIRVWFSNKRVKIKKS
>53.460.AAA	>53.197.AAC	>53.565.AAG	>53.564.AAT	>53.502.ACA	>53.655.ACC	>53.599.ACG	>53.712.ACT	>53.465.AGA	>53.598.AGC	>53.568.AGG	>53.462.AGT	>53.433.ATA	>53.496.ATC	>53.575.ATG	>53.316.ATT	>53.175.CAA	>53.120.CAC	>53.967.CAG	>53.167.CAT	>53.416.CCA	>53.701.CCC	>53.754.CCG	>53.694.CCT	>53.770.CGA	>53.731.CGC	>53.735.CGG	>53.1280.CGT	>53.586.CTA	>53.493.CTC	>53.167.CTG	>53.377.CTT	>53.146.GAA	>53.32.GAC	>53.219.GAG	>53.51.GAT	>53.135.GCA	>53.75.GCC	>53.65.GCG	>53.55.GCT	>53.328.GGA	>53.179.GGC	>53.407.GGG	>53.159.GGT	>53.89.GTA	>53.124.GTC	>53.248.GTG	>53.216.GTT	>53.350.TAA	>53.174.TAC
EQQIASWFANKRFKIKKS	ERQIGAWFRNKRHKIKKS	EKQILQWFWNKRHKIKKS	EKQISVWFNNKRFKIKKS	EKQIGNWFNNKRRKIKKS	EKQISSWFHNKRNKIKKS	EKQIRYWFDNKRRKIKKS	EKQILSWFHNKRMKIKKS	ESQIFRWFANKRHKIKKS	EQQIARWFSNKRVKIKKS	EAQIVTWFQNKRTKIKKS	ERQIKKWFENKRHKIKKS	EKQIGYWFVNKRNKIKKS	ERQIRMWFANKRFKIKKS	EMQIVYWFQNKRWKIKKS	ERQITVWFQNKRAKIKKS	EMQIHYWFSNKRRKIKKS	ESQIGTWFRNKRRKIKKS	ERQISHWFWNKRRKIKKS	ERQIMCWFSNKRRKIKKS	ERQIADWFANKRKKIKKS	EAQIMCWFSNKRKKIKKS	EVQICNWFANKRKKIKKS	EVQINNWFANKRKKIKKS	EVQIKYWFQNKRSKIKKS	EIQIRNWFSNKRVKIKKS	EKQIVYWFENKRRKIKKS	ERQIMHWFSNKRRKIKKS	EKQIDYWFGNKRKKIKKS	EVQISNWFSNKRKKIKKS	ESQITYWFQNKRRKIKKS	ESQIMWWFGNKRKKIKKS	EEQIARWFQNKRWKIKKS	EGQIRRWFRNKRWKIKKS	EVQIMRWFWNKRWKIKKS	EGQIVRWFSNKRYKIKKS	EVQITRWFQNKRLKIKKS	ELQIGSWFRNKRYKIKKS	ESQIMDWFRNKRYKIKKS	EPQIQDWFRNKRYKIKKS	EKQISKWFDNKRWKIKKS	ERQIVKWFNNKRNKIKKS	ESQIAKWFENKRRKIKKS	ETQISKWFNNKRMKIKKS	EGQICRWFQNKRTKIKKS	ELQIRRWFGNKRYKIKKS	EQQIGKWFENKRFKIKKS	ERQITKWFGNKRWKIKKS	ERQISTWFVNKRAKIKKS	EEQIRVWFSNKRVKIKKS
>54.452.AAA	>54.197.AAC	>54.555.AAG	>54.541.AAT	>54.498.ACA	>54.649.ACC	>54.572.ACG	>54.711.ACT	>54.460.AGA	>54.593.AGC	>54.559.AGG	>54.461.AGT	>54.428.ATA	>54.489.ATC	>54.568.ATG	>54.315.ATT	>54.174.CAA	>54.119.CAC	>54.966.CAG	>54.167.CAT	>54.411.CCA	>54.698.CCC	>54.754.CCG	>54.685.CCT	>54.765.CGA	>54.729.CGC	>54.689.CGG	>54.1258.CGT	>54.581.CTA	>54.475.CTC	>54.158.CTG	>54.355.CTT	>54.145.GAA	>54.31.GAC	>54.217.GAG	>54.51.GAT	>54.132.GCA	>54.72.GCC	>54.64.GCG	>54.55.GCT	>54.316.GGA	>54.162.GGC	>54.405.GGG	>54.157.GGT	>54.89.GTA	>54.123.GTC	>54.241.GTG	>54.216.GTT	>54.345.TAA	>54.173.TAC
ERQIQQWFWNKRCKIKKS	EGQITSWFRNKRHKIKKS	ERQISQWFWNKRFKIKKS	EKQIASWFNNKRHKIKKS	EKQIRMWFENKRRKIKKS	EKQITNWFQNKRKKIKKS	EQQIRRWFENKRRKIKKS	ERQISSWFHNKRTKIKKS	ERQIKSWFNNKRYKIKKS	ERQIMRWFNNKRVKIKKS	EKQIRKWFENKRSKIKKS	ERQIRVWFQNKRFKIKKS	EFQIRWWFNNKRWKIKKS	ELQIIYWFSNKRYKIKKS	ELQIIYWFQNKRWKIKKS	ERQIQIWFQNKRSKIKKS	EMQIHMWFANKRRKIKKS	EQQIAQWFRNKRRKIKKS	EVQISWWFWNKRRKIKKS	EMQIGQWFSNKRRKIKKS	EVQIANWFGNKRKKIKKS	ELQIAYWFSNKRKKIKKS	EVQIINWFHNKRKKIKKS	EQQITDWFGNKRKKIKKS	ERQIQYWFGNKRAKIKKS	EAQICNWFSNKRRKIKKS	ERQILYWFENKRRKIKKS	ERQIVYWFGNKRAKIKKS	EMQISYWFSNKRKKIKKS	EVQISYWFGNKRKKIKKS	EVQITMWFYNKRFKIKKS	ERQISNWFGNKRAKIKKS	EGQILHWFKNKRFKIKKS	EEQITRWFRNKRWKIKKS	EKQICRWFWNKRYKIKKS	EMQIAVWFRNKRWKIKKS	ERQILKWFQNKRQKIKKS	ETQIWRWFKNKRYKIKKS	ELQILDWFRNKRYKIKKS	EMQITDWFRNKRFKIKKS	EMQINKWFDNKRQKIKKS	EMQIVKWFNNKRQKIKKS	EPQILKWFENKRRKIKKS	EKQISKWFDNKRLKIKKS	EGQIGRWFQNKRRKIKKS	EMQIGKWFRNKRCKIKKS	ERQIAKWFENKRRKIKKS	EHQIKVWFSNKRYKIKKS	ERQIKNWFCNKRAKIKKS	EEQIRIWFSNKRAKIKKS
>55.451.AAA	>55.195.AAC	>55.555.AAG	>55.541.AAT	>55.495.ACA	>55.648.ACC	>55.553.ACG	>55.694.ACT	>55.457.AGA	>55.586.AGC	>55.553.AGG	>55.458.AGT	>55.428.ATA	>55.473.ATC	>55.567.ATG	>55.314.ATT	>55.172.CAA	>55.118.CAC	>55.947.CAG	>55.166.CAT	>55.411.CCA	>55.688.CCC	>55.739.CCG	>55.681.CCT	>55.742.CGA	>55.724.CGC	>55.670.CGG	>55.1216.CGT	>55.574.CTA	>55.436.CTC	>55.155.CTG	>55.352.CTT	>55.142.GAA	>55.31.GAC	>55.212.GAG	>55.51.GAT	>55.128.GCA	>55.72.GCC	>55.64.GCG	>55.55.GCT	>55.316.GGA	>55.159.GGC	>55.403.GGG	>55.156.GGT	>55.88.GTA	>55.121.GTC	>55.241.GTG	>55.213.GTT	>55.342.TAA	>55.171.TAC
ERQISSWFANKRFKIKKS	EGQICSWFRNKRFKIKKS	EHQIAQWFWNKRHKIKKS	EPQIAQWFANKRFKIKKS	EVQIGNWFNNKRRKIKKS	EFQIQAWFKNKRYKIKKS	EMQIRHWFENKRRKIKKS	EQQIRNWFHNKRTKIKKS	EQQIFRWFANKRAKIKKS	ERQIMRWFNNKRVKIKKS	EKQIMKWFENKRRKIKKS	ESQILRWFCNKREKIKKS	ERQIMGWFANQRVKIKKS	EGQISVWFCNKRCKIKKS	EPQISQWFSNKRSKIKKS	ERQIKVWFQNKRSKIKKS	ERQILMWFQNKRRKIKKS	ETQIGTWFRNKRRKIKKS	EVQITEWFANKRVKIKKS	ELQISNWFSNKRRKIKKS	EVQIMNWFANKRKKIKKS	ETQISNWFSNKRKKIKKS	ERQIVYWFENKRRKIKKS	EKQIMNWFANKRKKIKKS	ELQIQYWFANKRMKIKKS	EAQIGMWFSNKRRKIKKS	ESQICHWFENKRRKIKKS	ESQITNWFSNKRRKIKKS	ELQIHYWFANKRKKIKKS	ESQIMYWFGNKRKKIKKS	ERQIIMWFENKRKKIKKS	ELQIRFWFGNKRSKIKKS	EPQIKRWFQNKRFKIKKS	ELQIVRWFRNKRWKIKKS	EHQISQWFWNKRYKIKKS	EGQIQHWFRNKRYKIKKS	EMQIQRWFQNKRFKIKKS	ECQIYAWFKNKRYKIKKS	EFQIGDWFRNKRYKIKKS	EPQITDWFRNKRYKIKKS	EMQIRKWFDNKRQKIKKS	ESQIMKWFNNKRQKIKKS	ERQIAKWFENKRRKIKKS	ERQIVKWFNNKRAKIKKS	EAQIGRWFQNKRMKIKKS	EYQIRRWFANKRVKIKKS	ERQINSWFQNKRYKIKKS	EHQILKWFANKRHKIKKS	ERQIMTWFCNKRSKIKKS	EFQISRWFINKRAKIKKS
>56.443.AAA	>56.194.AAC	>56.548.AAG	>56.534.AAT	>56.491.ACA	>56.628.ACC	>56.538.ACG	>56.676.ACT	>56.439.AGA	>56.585.AGC	>56.519.AGG	>56.456.AGT	>56.427.ATA	>56.465.ATC	>56.563.ATG	>56.311.ATT	>56.172.CAA	>56.117.CAC	>56.939.CAG	>56.166.CAT	>56.406.CCA	>56.680.CCC	>56.715.CCG	>56.648.CCT	>56.740.CGA	>56.708.CGC	>56.659.CGG	>56.1189.CGT	>56.564.CTA	>56.425.CTC	>56.155.CTG	>56.335.CTT	>56.139.GAA	>56.31.GAC	>56.211.GAG	>56.50.GAT	>56.128.GCA	>56.69.GCC	>56.63.GCG	>56.54.GCT	>56.315.GGA	>56.150.GGC	>56.397.GGG	>56.156.GGT	>56.88.GTA	>56.120.GTC	>56.241.GTG	>56.212.GTT	>56.327.TAA	>56.168.TAC
EKQIMSWFANKRFKIKKS	ERQIGTWFRNKRHKIKKS	EHQINQWFWNKRFKIKKS	EKQISVWFSNKRFKIKKS	ESQIKDWFNNKRRKIKKS	EGQISSWFHNKRMKIKKS	EKQIQTWFQNKRNKIKKS	EWQIYAWFKNKRYKIKKS	EGQIGRWFTNKRYKIKKS	ERQIMSWFSNKRVKIKKS	ERQIKKWFENKRRKIKKS	ERQIRKWFENKRCKIKKS	ERQIMSWFANKRQKIKKS	EVQIIHWFPNKRSKIKKS	ELQITYWFQNKRWKIKKS	ERQIVLWFQNKRAKIKKS	EVQIMYWFQNKRRKIKKS	EEQIRCWFSNKRRKIKKS	ETQISNWFWNKRRKIKKS	ETQIMSWFSNKRRKIKKS	EPQIANWFANKRKKIKKS	EAQIMNWFSNKRKKIKKS	EVQISNWFWNKRKKIKKS	ECQILNWFSNKRKKIKKS	ETQIVYWFANKRAKIKKS	EEQITNWFSNKRRKIKKS	ETQIQRWFENKRRKIKKS	ERQINDWFSNKRRKIKKS	EMQISYWFANKRKKIKKS	EKQILNWFANKRKKIKKS	EKQIMYWFQNKRKKIKKS	EVQILHWFGNKRAKIKKS	ELQIARWFQNKRWKIKKS	EEQIIRWFRNKRWKIKKS	ESQISRWFWNKRYKIKKS	ECQIARWFLNKRYKIKKS	EEQIARWFQNKRAKIKKS	EEQIRLWFKNKRFKIKKS	ERQILDWFRNKRYKIKKS	ERQIGVWFKNKRFKIKKS	EEQIRKWFDNKRYKIKKS	ECQILKWFNNKRQKIKKS	EKQILKWFENKRQKIKKS	EKQIAKWFDNKRMKIKKS	EQQIRRWFENKRWKIKKS	EVQIGKWFRNKRHKIKKS	EKQISRWFENKRFKIKKS	ELQICRWFGNKRYKIKKS	ERQITVWFRNKRAKIKKS	EGQIRIWFSNKRAKIKKS
>57.439.AAA	>57.194.AAC	>57.544.AAG	>57.526.AAT	>57.489.ACA	>57.627.ACC	>57.506.ACG	>57.663.ACT	>57.439.AGA	>57.573.AGC	>57.518.AGG	>57.454.AGT	>57.426.ATA	>57.465.ATC	>57.560.ATG	>57.308.ATT	>57.171.CAA	>57.116.CAC	>57.931.CAG	>57.166.CAT	>57.384.CCA	>57.673.CCC	>57.684.CCG	>57.640.CCT	>57.729.CGA	>57.706.CGC	>57.642.CGG	>57.1173.CGT	>57.562.CTA	>57.423.CTC	>57.148.CTG	>57.325.CTT	>57.139.GAA	>57.31.GAC	>57.211.GAG	>57.50.GAT	>57.127.GCA	>57.68.GCC	>57.63.GCG	>57.54.GCT	>57.309.GGA	>57.149.GGC	>57.393.GGG	>57.155.GGT	>57.88.GTA	>57.119.GTC	>57.241.GTG	>57.209.GTT	>57.319.TAA	>57.164.TAC
ELQIKYWFVNKRHKIKKS	EKQIAMWFRNKRFKIKKS	EMQIKQWFWNKRFKIKKS	ESQISSWFSNKRFKIKKS	EIQIYNWFNNKRRKIKKS	EMQIWHWFVNKRLKIKKS	EEQIRNWFENKRRKIKKS	ELQIHLWFPNKREKIKKS	EGQIFRWFANKRAKIKKS	ETQIMRWFNNKRVKIKKS	EKQIKKWFENKRRKIKKS	EKQINKWFMNKRWKIKKS	ERQIIYWFNNKRAKIKKS	ERQIRRWFLNKRTKIKKS	ERQITYWFQNKRFKIKKS	ERQIKVWFQNKRSKIKKS	EVQIFSWFANKRRKIKKS	EPQIGQWFRNKRRKIKKS	EEQISWWFWNKRRKIKKS	EMQIAWWFGNKRRKIKKS	EVQITNWFGNKRKKIKKS	ERQISHWFENKRRKIKKS	ESQIVYWFENKRRKIKKS	ERQIGDWFSNKRKKIKKS	EYQIFCWFANKRAKIKKS	EKQISMWFNNKRKKIKKS	ESQITRWFENKRRKIKKS	ETQIMNWFSNKRAKIKKS	EQQIFCWFANKRRKIKKS	ESQIRYWFSNKRKKIKKS	ERQIMYWFWNKRRKIKKS	EQQIRYWFSNKRKKIKKS	EGQIFHWFKNKRSKIKKS	EAQIRRWFRNKRWKIKKS	EMQINRWFWNKRYKIKKS	EMQIMVWFRNKRYKIKKS	EMQICKWFQNKRRKIKKS	EKQIRLWFKNKRWKIKKS	EFQITDWFRNKRYKIKKS	EKQITDWFRNKRHKIKKS	EGQIVKWFDNKRQKIKKS	EAQIVKWFSNKRTKIKKS	EVQILKWFENKRRKIKKS	ESQIAKWFSNKRVKIKKS	EKQIEKWFQNKRAKIKKS	EQQILKWFRNKRCKIKKS	EIQIEKWFQNKRYKIKKS	EYQILRWFANKRWKIKKS	ERQIFLWFANKRAKIKKS	ESQIRIWFSNKRVKIKKS
>58.434.AAA	>58.194.AAC	>58.530.AAG	>58.523.AAT	>58.488.ACA	>58.620.ACC	>58.506.ACG	>58.652.ACT	>58.436.AGA	>58.568.AGC	>58.514.AGG	>58.452.AGT	>58.417.ATA	>58.443.ATC	>58.555.ATG	>58.304.ATT	>58.170.CAA	>58.114.CAC	>58.912.CAG	>58.164.CAT	>58.384.CCA	>58.669.CCC	>58.681.CCG	>58.597.CCT	>58.713.CGA	>58.700.CGC	>58.609.CGG	>58.1149.CGT	>58.559.CTA	>58.422.CTC	>58.147.CTG	>58.325.CTT	>58.137.GAA	>58.30.GAC	>58.210.GAG	>58.50.GAT	>58.122.GCA	>58.68.GCC	>58.63.GCG	>58.53.GCT	>58.308.GGA	>58.128.GGC	>58.392.GGG	>58.154.GGT	>58.87.GTA	>58.114.GTC	>58.239.GTG	>58.209.GTT	>58.319.TAA	>58.162.TAC
ERQIIYWFNNKRHKIKKS	EAQITSWFRNKRFKIKKS	ELQISQWFWNKRHKIKKS	ERQIASWFANKRFKIKKS	ERQISTWFWNKRRKIKKS	EKQISYWFHNKRTKIKKS	EKQILWWFDNKRRKIKKS	EPQIKYWFENKRRKIKKS	ERQIFRWFANKRWKIKKS	EVQIVRWFNNKRVKIKKS	EEQINKWFENKRYKIKKS	ESQIVKWFENKRFKIKKS	EWQIIYWFFNKRRKIKKS	EPQISMWFRNKRSKIKKS	EVQILTWFANKRNKIKKS	EFQIRVWFQNKRNKIKKS	ELQIAYWFANKRRKIKKS	EVQIGMWFRNKRRKIKKS	EKQIGDWF_NKREKIKKS	ELQISNWFANKRRKIKKS	EQQITYWFQNKRKKIKKS	ERQISDWFSNKRKKIKKS	EKQIMNWFQNKRKKIKKS	ERQISDWFGNKRKKIKKS	EIQIMYWFQNKRMKIKKS	ELQIRDWFSNKRRKIKKS	EKQIAHWFENKRRKIKKS	EKQIATWFNNKRRKIKKS	EVQITYWFANKRQKIKKS	ERQIGFWFGNKRKKIKKS	EKQIQYWFQNKRKKIKKS	ERQIMHWFGNKRKKIKKS	EGQINRWFQNKRWKIKKS	EGQIQRWFRNKRWKIKKS	EHQIKQWFWNKRWKIKKS	ELQILSWFRNKRYKIKKS	EKQIAKWFQNKRRKIKKS	EWQIAAWFKNKRFKIKKS	EQQILDWFRNKRYKIKKS	EAQILDWFRNKRFKIKKS	EKQISKWFDNKRMKIKKS	EVQILKWFNNKRQKIKKS	EVQICKWFENKRRKIKKS	EKQILKWFNNKRVKIKKS	ELQIFHWFKNKRLKIKKS	EYQIVRWFGNKRAKIKKS	EVQIGRWFENKRYKIKKS	EVQIQRWFGNKRFKIKKS	ESQIRVWFCNKRAKIKKS	EEQIRVWFSNKRSKIKKS
>59.429.AAA	>59.193.AAC	>59.529.AAG	>59.518.AAT	>59.478.ACA	>59.602.ACC	>59.497.ACG	>59.641.ACT	>59.434.AGA	>59.567.AGC	>59.511.AGG	>59.450.AGT	>59.415.ATA	>59.435.ATC	>59.546.ATG	>59.303.ATT	>59.169.CAA	>59.113.CAC	>59.908.CAG	>59.164.CAT	>59.372.CCA	>59.656.CCC	>59.678.CCG	>59.588.CCT	>59.709.CGA	>59.697.CGC	>59.608.CGG	>59.1134.CGT	>59.547.CTA	>59.401.CTC	>59.145.CTG	>59.324.CTT	>59.137.GAA	>59.30.GAC	>59.209.GAG	>59.49.GAT	>59.120.GCA	>59.67.GCC	>59.63.GCG	>59.53.GCT	>59.294.GGA	>59.126.GGC	>59.391.GGG	>59.152.GGT	>59.87.GTA	>59.113.GTC	>59.238.GTG	>59.206.GTT	>59.307.TAA	>59.162.TAC
ERQIMNWFGNKRHKIKKS	ERQISSWFRNKRFKIKKS	ELQIRQWFWNKRHKIKKS	ESQIAGWFSNKRFKIKKS	ELQIQRWFWNKRRKIKKS	ERQILNWFQNKRKKIKKS	EKQIRYWFENKRRKIKKS	ESQIGVWFPNKRPKIKKS	ERQIFHWFANKRMKIKKS	EIQIYRWFSNKRAKIKKS	ERQIMKWFDNKRQKIKKS	EKQIRKWFENKRFKIKKS	ESQISRWFANKRVKIKKS	ERQIDAWFGNKRMKIKKS	EKQIVFWFQNKRWKIKKS	ERQIVVWFQNKRSKIKKS	EKQIANWFANKRRKIKKS	EAQIAMWFRNKRRKIKKS	EDQISWWFWNKRRKIKKS	EKQINTWFSNKRRKIKKS	EVQIANWFANKRKKIKKS	EGQITNWFSNKRKKIKKS	ESQIMNWFQNKRKKIKKS	EVQISNWFGNKRKKIKKS	ECQIFNWFANKRRKIKKS	EIQIKDWFSNKRRKIKKS	ESQIARWFENKRRKIKKS	ELQIMYWFNNKRRKIKKS	EGQIFWWFANKRKKIKKS	ESQIRYWFANKRKKIKKS	ERQIAYWFENKRKKIKKS	ERQIVHWFGNKRNKIKKS	ELQIFTWFKNKRYKIKKS	ENQIARWFRNKRFKIKKS	ERQIAQWFWNKRWKIKKS	EGQIMDWFRNKRWKIKKS	EKQIGRWFQNKRFKIKKS	EAQIKSWFKNKRFKIKKS	ELQITDWFRNKRYKIKKS	ESQISDWFRNKRFKIKKS	ESQIRKWFDNKRYKIKKS	EKQIVKWFNNKRLKIKKS	ERQILKWFENKRMKIKKS	EGQIAKWFNNKRCKIKKS	EVQISKWFQNKRCKIKKS	EAQISKWFRNKRNKIKKS	ERQISKWFENKRGKIKKS	EMQICRWFANKRYKIKKS	EKQIVTWFANKRAKIKKS	EEQIRVWFSNKRAKIKKS
>60.429.AAA	>60.192.AAC	>60.528.AAG	>60.508.AAT	>60.472.ACA	>60.600.ACC	>60.492.ACG	>60.628.ACT	>60.429.AGA	>60.564.AGC	>60.508.AGG	>60.447.AGT	>60.413.ATA	>60.434.ATC	>60.539.ATG	>60.295.ATT	>60.169.CAA	>60.113.CAC	>60.882.CAG	>60.163.CAT	>60.372.CCA	>60.638.CCC	>60.666.CCG	>60.588.CCT	>60.701.CGA	>60.679.CGC	>60.601.CGG	>60.1118.CGT	>60.538.CTA	>60.396.CTC	>60.144.CTG	>60.321.CTT	>60.137.GAA	>60.30.GAC	>60.208.GAG	>60.49.GAT	>60.119.GCA	>60.66.GCC	>60.63.GCG	>60.53.GCT	>60.290.GGA	>60.111.GGC	>60.386.GGG	>60.149.GGT	>60.87.GTA	>60.113.GTC	>60.231.GTG	>60.203.GTT	>60.304.TAA	>60.160.TAC
ESQITSWFANKRFKIKKS	ENQICSWFRNKRFKIKKS	EKQILQWFWNKRHKIKKS	ERQIITWFCNKRHKIKKS	ESQIGNWFHNKRTKIKKS	ERQIAGWFHNKRTKIKKS	EKQITAWFQNKRNKIKKS	ETQIMSWFHNKRTKIKKS	ELQIFRWFANKRWKIKKS	EKQISRWFNNKRVKIKKS	EKQIGKWFENKRRKIKKS	ERQIKKWFENKRWKIKKS	ENQIRWWFNNKRVKIKKS	ETQINGWFQNKRLKIKKS	ETQITYWFQNKRWKIKKS	ERQIKIWFQNKRQKIKKS	ERQIADWFANKRRKIKKS	ESQIRQWFSNKRRKIKKS	EWQIERWFPNKRTKIKKS	EKQIANWFSNKRRKIKKS	ESQIHYWFANKRRKIKKS	ERQILNWFSNKRKKIKKS	EQQITDWFQNKRKKIKKS	EMQIVNWFSNKRKKIKKS	EHQIMYWFQNKRAKIKKS	EAQIQCWFNNKRRKIKKS	EKQIGHWFENKRRKIKKS	EKQIYYWFSNKRMKIKKS	EHQISYWFANKRKKIKKS	ERQIANWFSNKRKKIKKS	EMQIAYWFWNKRKKIKKS	ETQIGYWFGNKRRKIKKS	EEQILRWFQNKRWKIKKS	EVQITRWFRNKRWKIKKS	ERQITQWFWNKRWKIKKS	EWQIDKWFVNKRYKIKKS	EQQIFKWFANKRFKIKKS	EGQIRVWFKNKRYKIKKS	EQQILDWFRNKRYKIKKS	EKQILNWFRNKRFKIKKS	EEQISKWFDNKRFKIKKS	EPQILKWFSNKRSKIKKS	EMQISKWFENKRRKIKKS	EGQICKWFNNKRFKIKKS	ESQIRRWFDNKRFKIKKS	EAQIGKWFRNKRAKIKKS	EQQISRWFENKRFKIKKS	EVQICKWFCNKRFKIKKS	ERQIATWFANKRSKIKKS	EEQIRVWFSNKRVKIKKS
>61.422.AAA	>61.190.AAC	>61.524.AAG	>61.497.AAT	>61.471.ACA	>61.600.ACC	>61.475.ACG	>61.622.ACT	>61.429.AGA	>61.562.AGC	>61.506.AGG	>61.441.AGT	>61.408.ATA	>61.409.ATC	>61.536.ATG	>61.293.ATT	>61.166.CAA	>61.112.CAC	>61.868.CAG	>61.163.CAT	>61.361.CCA	>61.636.CCC	>61.631.CCG	>61.577.CCT	>61.698.CGA	>61.644.CGC	>61.535.CGG	>61.1093.CGT	>61.533.CTA	>61.334.CTC	>61.142.CTG	>61.316.CTT	>61.136.GAA	>61.30.GAC	>61.208.GAG	>61.49.GAT	>61.117.GCA	>61.65.GCC	>61.63.GCG	>61.53.GCT	>61.288.GGA	>61.110.GGC	>61.385.GGG	>61.147.GGT	>61.86.GTA	>61.112.GTC	>61.218.GTG	>61.203.GTT	>61.303.TAA	>61.159.TAC
EKQIGTWFSNKRHKIKKS	ECQIGAWFRNKRHKIKKS	ERQITQWFWNKRHKIKKS	EVQIASWFSNKRFKIKKS	EKQIIDWFNNKRRKIKKS	EKQIVSWFHNKRMKIKKS	ESQIRNWFDNKRRKIKKS	EKQISAWFHNKRMKIKKS	ETQIFRWFANKRHKIKKS	EQQIRYWFSNKRVKIKKS	EPQIRWWFFNKRVKIKKS	EHQIAKWFENKRYKIKKS	ERQISTWFQNKRNKIKKS	ERQICLWFENKRGKIKKS	EKQILYWFQNKRSKIKKS	ETQIRVWFQNKRSKIKKS	ELQIMYWFQNKRRKIKKS	ECQIGQWFRNKRRKIKKS	EIQISRWFWNKRRKIKKS	ELQISNWFSNKRRKIKKS	EKQILMWFQNKRKKIKKS	ERQIKDWFSNKRKKIKKS	ESQIGNWFQNKRKKIKKS	ESQIMNWFSNKRKKIKKS	ERQIMYWFANKRQKIKKS	ERQIMYWFGNKRAKIKKS	EIQIRRWFENKRRKIKKS	EKQIAHWFSNKRRKIKKS	ELQITYWFGNKRKKIKKS	EKQIRYWFGNKRKKIKKS	ESQIQNWFQNKRKKIKKS	EQQIGYWFGNKRRKIKKS	ETQINRWFQNKRWKIKKS	ELQINKWFRNKRWKIKKS	ELQINRWFWNKRYKIKKS	EQQIAHWFRNKRFKIKKS	EGQIIRWFQNKRAKIKKS	EKQIIKWFVNKRSKIKKS	EEQILDWFRNKRYKIKKS	ERQIDDWFRNKRFKIKKS	ERQIAKWFDNKRSKIKKS	ECQIVKWFNNKRQKIKKS	EHQILKWFENKRWKIKKS	ERQILKWFDNKRVKIKKS	EMQISRWFANKRAKIKKS	EMQIRRWFGNKRYKIKKS	EKQIMKWFENKRLKIKKS	ERQICSWFANKRYKIKKS	ERQILIWFRNKRAKIKKS	EEQIRLWFSNKRAKIKKS
>62.413.AAA	>62.190.AAC	>62.504.AAG	>62.490.AAT	>62.467.ACA	>62.594.ACC	>62.473.ACG	>62.622.ACT	>62.426.AGA	>62.559.AGC	>62.497.AGG	>62.439.AGT	>62.407.ATA	>62.400.ATC	>62.529.ATG	>62.291.ATT	>62.165.CAA	>62.112.CAC	>62.854.CAG	>62.162.CAT	>62.357.CCA	>62.624.CCC	>62.631.CCG	>62.576.CCT	>62.680.CGA	>62.632.CGC	>62.520.CGG	>62.1054.CGT	>62.531.CTA	>62.306.CTC	>62.140.CTG	>62.310.CTT	>62.132.GAA	>62.29.GAC	>62.204.GAG	>62.48.GAT	>62.113.GCA	>62.65.GCC	>62.62.GCG	>62.52.GCT	>62.280.GGA	>62.110.GGC	>62.359.GGG	>62.147.GGT	>62.86.GTA	>62.108.GTC	>62.206.GTG	>62.198.GTT	>62.302.TAA	>62.159.TAC
EKQIQQWFWNKRHKIKKS	EGQISSWFRNKRHKIKKS	ETQIMQWFWNKRFKIKKS	ERQINTWFTNKRFKIKKS	EKQIVYWFTNKRRKIKKS	EKQIVYWFENKRRKIKKS	EAQIRRWFENKRRKIKKS	ELQILYWFNNKRQKIKKS	EAQIFRWFANKRWKIKKS	EWQIYTWFKNKRFKIKKS	EKQILKWFENKRAKIKKS	ERQIKKWFENKRSKIKKS	ERQINSWFNNKRAKIKKS	EWQINNWFINKRRKIKKS	ESQIAVWFQNKRQKIKKS	EEQIRVWFQNKRAKIKKS	ESQIHYWFANKRRKIKKS	EMQIANWFRNKRRKIKKS	EIQIAPWFENKRLKIKKS	ETQILSWFSNKRRKIKKS	EQQIMHWFANKRKKIKKS	EQQISDWFSNKRKKIKKS	ETQITNWFQNKRKKIKKS	EVQISTWFSNKRKKIKKS	ERQIHDWFCNKRRKIKKS	EGQISMWFSNKRRKIKKS	ERQIIDWFQNKRCKIKKS	EAQIAWWFSNKRRKIKKS	EVQIQHWFANKRKKIKKS	EQQISNWFSNKRKKIKKS	EAQIINWFQNKRRKIKKS	EVQISYWFSNKRKKIKKS	ENQIVRWFQNKRWKIKKS	EGQIERWFRNKRWKIKKS	ERQISVWFWNKRYKIKKS	EVQIMVWFRNKRWKIKKS	EYQIARWFQNKRRKIKKS	EFQIGIWFKNKRYKIKKS	EKQISHWFCNKRFKIKKS	EFQISDWFRNKRYKIKKS	EIQILRWFDNKRCKIKKS	EKQIMKWFNNKRVKIKKS	EEQIRKWFENKRSKIKKS	ETQIGKWFNNKRLKIKKS	ELQIAKWFQNKRSKIKKS	ERQIMRWFGNKRFKIKKS	EKQILVWFQNKRFKIKKS	ERQIGKWFANKRSKIKKS	EKQICLWFRNKRAKIKKS	ETQIRLWFSNKRAKIKKS
>63.412.AAA	>63.189.AAC	>63.500.AAG	>63.490.AAT	>63.466.ACA	>63.586.ACC	>63.464.ACG	>63.621.ACT	>63.424.AGA	>63.532.AGC	>63.490.AGG	>63.436.AGT	>63.401.ATA	>63.388.ATC	>63.529.ATG	>63.289.ATT	>63.163.CAA	>63.112.CAC	>63.846.CAG	>63.162.CAT	>63.356.CCA	>63.623.CCC	>63.629.CCG	>63.567.CCT	>63.673.CGA	>63.630.CGC	>63.517.CGG	>63.998.CGT	>63.529.CTA	>63.303.CTC	>63.131.CTG	>63.301.CTT	>63.132.GAA	>63.29.GAC	>63.203.GAG	>63.48.GAT	>63.112.GCA	>63.62.GCC	>63.61.GCG	>63.52.GCT	>63.280.GGA	>63.110.GGC	>63.356.GGG	>63.146.GGT	>63.85.GTA	>63.104.GTC	>63.205.GTG	>63.197.GTT	>63.301.TAA	>63.156.TAC
EKQILSWFANKRFKIKKS	ESQITSWFRNKRFKIKKS	ERQIQQWFWNKRWKIKKS	EIQISAWFSNKRFKIKKS	ESQIPQWFTNQRVKIKKS	EKQITYWFHNKRTKIKKS	ETQIQMWFGNKRYKIKKS	ELQIYYWFKNKRYKIKKS	ETQIFRWFANKRYKIKKS	EIQILLWFSNKRVKIKKS	ERQISKWFENKRSKIKKS	EMQIKKWFENKRHKIKKS	EKQIQSWFANKRTKIKKS	EEQISGWFRNKRCKIKKS	ERQIVYWFQNKRWKIKKS	ERQIVVWFQNKRQKIKKS	ELQIAYWFSNKRRKIKKS	ELQIAMWFRNKRRKIKKS	REAVQ_WFTNKRCKIKKS	EGQILQWFSNKRRKIKKS	ERQISDWFANKRKKIKKS	EKQIATWFSNKRKKIKKS	ERQIMNWFQNKRKKIKKS	ETQIANWFGNKRKKIKKS	ERQIADWFANKRRKIKKS	EKQIGVWFNNKRRKIKKS	EMQIIRWFENKRRKIKKS	EKQISFWFNNKRRKIKKS	ESQIRMWFQNKRKKIKKS	EVQIMNWFSNKRKKIKKS	ELQIYNWFQNKRKKIKKS	ETQISNWFGNKRRKIKKS	EKQIFNWFKNKRYKIKKS	ERQIDRWFRNKRWKIKKS	EHQIMVWFWNKRYKIKKS	ELQIMVWFRNKRYKIKKS	ETQISKWFQNKRMKIKKS	ETQIRVWFKNKRFKIKKS	EQQIADWFRNKRYKIKKS	EKQIAAWFKNKRWKIKKS	ERQIFKWFANKRAKIKKS	ESQILKWFSNKRQKIKKS	EKQILKWFENKRRKIKKS	EYQIRKWFDNKRFKIKKS	EEQIVKWFQNKRWKIKKS	EQQIGKWFRNKRCKIKKS	ERQIQIWFQNKRFKIKKS	EVQIRRWFQNKRFKIKKS	ERQIMVWFVNKRAKIKKS	EEQIRVWFSNKRAKIKKS
>64.411.AAA	>64.189.AAC	>64.500.AAG	>64.480.AAT	>64.464.ACA	>64.575.ACC	>64.463.ACG	>64.619.ACT	>64.422.AGA	>64.532.AGC	>64.481.AGG	>64.436.AGT	>64.397.ATA	>64.368.ATC	>64.528.ATG	>64.282.ATT	>64.163.CAA	>64.111.CAC	>64.842.CAG	>64.162.CAT	>64.347.CCA	>64.620.CCC	>64.628.CCG	>64.556.CCT	>64.672.CGA	>64.627.CGC	>64.488.CGG	>64.996.CGT	>64.527.CTA	>64.297.CTC	>64.118.CTG	>64.298.CTT	>64.132.GAA	>64.29.GAC	>64.200.GAG	>64.48.GAT	>64.111.GCA	>64.61.GCC	>64.61.GCG	>64.51.GCT	>64.279.GGA	>64.109.GGC	>64.351.GGG	>64.145.GGT	>64.84.GTA	>64.103.GTC	>64.204.GTG	>64.195.GTT	>64.299.TAA	>64.156.TAC
ESQIATWFSNKRFKIKKS	ERQILAWFRNKRFKIKKS	EQQIMQWFWNKRFKIKKS	ERQITTWFSNKRFKIKKS	ELQISWWFWNKRRKIKKS	ERQITNWFHNKRTKIKKS	EQQIKAWFKNKRYKIKKS	EKQIKQWFENKRKKIKKS	EKQIRSWFNNKRYKIKKS	ERQIACWFSNKRVKIKKS	EGQIMKWFENKRYKIKKS	EKQIRKWFMNKRWKIKKS	EKQIQTWFANKRVKIKKS	ELQISRWFANKRRKIKKS	EKQIQYWFQNKRWKIKKS	EKQIKLWFQNKRAKIKKS	ESQISNWFANKRRKIKKS	EVQIAQWFRNKRRKIKKS	EPQIKYWFWNKRRKIKKS	ENQIANWFSNKRRKIKKS	ELQITYWFQNKRKKIKKS	EKQILCWFSNKRKKIKKS	EKQIRDWFQNKRKKIKKS	EKQISDWFSNKRKKIKKS	EKQITYWFQNKRCKIKKS	EVQIMYWFGNKRKKIKKS	EVQITYWFENKRRKIKKS	ELQISYWFNNKRRKIKKS	ERQIQTWFQNKRKKIKKS	EDQIRFWFSNKRKKIKKS	ERQIRYWFENKRKKIKKS	EMQIAHWFANKRRKIKKS	ERQIKRWFQNKRWKIKKS	EHQINRWFRNKRWKIKKS	ERQISRWFWNKRYKIKKS	EVQIGVWFRNKRYKIKKS	EGQIVKWFQNKRRKIKKS	EEQIRIWFKNKRFKIKKS	EFQISDWFRNKRYKIKKS	EGQIADWFRNKRYKIKKS	EKQISKWFDNKRHKIKKS	ESQITKWFSNKRVKIKKS	ELQIMKWFENKRRKIKKS	ERQIVKWFDNKRTKIKKS	EPQITRWFQNKRSKIKKS	EVQIRRWFANKRAKIKKS	EKQILRWFENKRFKIKKS	EYQIQRWFGNKRYKIKKS	EEQIRVWFANKRAKIKKS	EHQIRVWFSNKRAKIKKS
>65.409.AAA	>65.189.AAC	>65.496.AAG	>65.476.AAT	>65.463.ACA	>65.572.ACC	>65.461.ACG	>65.615.ACT	>65.420.AGA	>65.524.AGC	>65.477.AGG	>65.428.AGT	>65.397.ATA	>65.350.ATC	>65.518.ATG	>65.281.ATT	>65.161.CAA	>65.110.CAC	>65.827.CAG	>65.161.CAT	>65.347.CCA	>65.615.CCC	>65.627.CCG	>65.532.CCT	>65.645.CGA	>65.615.CGC	>65.487.CGG	>65.989.CGT	>65.511.CTA	>65.295.CTC	>65.113.CTG	>65.297.CTT	>65.132.GAA	>65.29.GAC	>65.200.GAG	>65.48.GAT	>65.111.GCA	>65.56.GCC	>65.60.GCG	>65.51.GCT	>65.269.GGA	>65.109.GGC	>65.350.GGG	>65.143.GGT	>65.84.GTA	>65.103.GTC	>65.202.GTG	>65.191.GTT	>65.295.TAA	>65.150.TAC
EKQIAYWFVNKRAKIKKS	ESQINSWFRNKRFKIKKS	ERQILQWFWNKRHKIKKS	ERQIRQWFANKRFKIKKS	ESQIKNWFNNKRRKIKKS	EVQIMSWFSNKRKKIKKS	ERQIKHWFENKRRKIKKS	ERQIKDWFQNKRSKIKKS	EIQIFRWFANKRWKIKKS	EGQIRSWFKNKRVKIKKS	EVQIAGWFGNKRSKIKKS	ERQINKWFENKRFKIKKS	ERQIYYWFANKRAKIKKS	EVQIRMWFGNKRFKIKKS	ESQITYWFQNKRWKIKKS	EMQIWSWFHNKRQKIKKS	EPQIHHWFANKRRKIKKS	EKQIYYWFSNKRRKIKKS	ECQISYWFWNKRRKIKKS	ETQIGNWFSNKRRKIKKS	EVQICMWFQNKRKKIKKS	ELQIYYWFSNKRKKIKKS	ETQILNWFQNKRKKIKKS	EAQISNWFHNKRKKIKKS	EMQIFHWFANKRRKIKKS	ERQILSWFSNKRRKIKKS	ERQIRLWFENKRRKIKKS	EIQISHWFSNKRRKIKKS	EAQIVFWFSNKRKKIKKS	EYQITYWFSNKRKKIKKS	ERQIMFWFGNKRKKIKKS	EFQISYWFGNKRRKIKKS	EPQILRWFQNKRFKIKKS	EGQIARWFRNKRWKIKKS	ERQIMRWFWNKRWKIKKS	EGQIMRWFNNKRYKIKKS	EMQISKWFQNKRFKIKKS	ERQITVWFKNKRWKIKKS	ERQIDDWFRNKRYKIKKS	EMQICDWFRNKRYKIKKS	EQQIKKWFDNKRQKIKKS	ERQIVKWFNNKRMKIKKS	ESQISKWFENKRLKIKKS	EHQISKWFNNKRAKIKKS	EKQIGRWFQNKRTKIKKS	EKQIGKWFRNKRTKIKKS	EKQIVKWFENKRRKIKKS	EKQIMRWFGNKRAKIKKS	ERQIQVWFFNKRAKIKKS	EEQIRVWFSNKRAKIKKS
>66.408.AAA	>66.188.AAC	>66.494.AAG	>66.472.AAT	>66.460.ACA	>66.552.ACC	>66.451.ACG	>66.610.ACT	>66.416.AGA	>66.521.AGC	>66.475.AGG	>66.426.AGT	>66.393.ATA	>66.343.ATC	>66.514.ATG	>66.279.ATT	>66.160.CAA	>66.110.CAC	>66.813.CAG	>66.161.CAT	>66.347.CCA	>66.614.CCC	>66.627.CCG	>66.512.CCT	>66.633.CGA	>66.613.CGC	>66.472.CGG	>66.947.CGT	>66.507.CTA	>66.289.CTC	>66.109.CTG	>66.296.CTT	>66.130.GAA	>66.29.GAC	>66.197.GAG	>66.47.GAT	>66.108.GCA	>66.56.GCC	>66.60.GCG	>66.50.GCT	>66.264.GGA	>66.108.GGC	>66.349.GGG	>66.143.GGT	>66.83.GTA	>66.103.GTC	>66.200.GTG	>66.187.GTT	>66.277.TAA	>66.148.TAC
ERQINCWFVNKRHKIKKS	ERQIMSWFRNKRFKIKKS	EMQIAQWFWNKRFKIKKS	ESQI_SWFMNKRVKIKKS	ETQIQHWFWNKRRKIKKS	EGQITSWFKNKRTKIKKS	EVQIRYWFENKRRKIKKS	ERQIKNWFQNKRKKIKKS	EPQIRRWFQNKRSKIKKS	EWQIVVWFSNKRTKIKKS	EVQIAKWFENKRAKIKKS	ETQIRWWFINKRSKIKKS	EKQIISWFNNKRAKIKKS	EIQIGTWFPNKRYKIKKS	EGQIDSWFANKRAKIKKS	ERQIAIWFQNKRAKIKKS	ESQIFYWFSNKRRKIKKS	ELQIAMWFRNKRRKIKKS	EAQIEGWFYNKRSKIKKS	ERQIVNWFSNKRRKIKKS	ERQIQMWFQNKRKKIKKS	ELQISYWFSNKRKKIKKS	EVQITNWFGNKRKKIKKS	ELQIGNWFSNKRKKIKKS	ERQILFWFQNKRRKIKKS	EVQISYWFSNKRRKIKKS	ETQINHWFENKRRKIKKS	ETQIANWFSNKRRKIKKS	ENQIKQWFQNKRKKIKKS	EVQIMNWFRNKRKKIKKS	EKQIKDWFQNKRKKIKKS	ELQIGYWFSNKRRKIKKS	EMQITHWFKNKRWKIKKS	EYQIERWFRNKRHKIKKS	EGQIARWFWNKRYKIKKS	EKQIEKWFINKRYKIKKS	EMQITKWFQNKRRKIKKS	EEQIRVWFKNKRWKIKKS	EKQILDWFRNKRFKIKKS	EWQIRLWFKNKRYKIKKS	ERQIAKWFDNKRSKIKKS	EKQILKWFNNKRMKIKKS	EPQILKWFENKRRKIKKS	ETQIMKWFDNKRQKIKKS	ESQINKWFQNKRRKIKKS	EIQILKWFRNKRFKIKKS	ESQIQKWFENKRFKIKKS	ERQITKWFGNKRHKIKKS	EKQICVWFANKRAKIKKS	EHQIRIWFSNKRAKIKKS
>67.406.AAA	>67.186.AAC	>67.494.AAG	>67.464.AAT	>67.455.ACA	>67.549.ACC	>67.448.ACG	>67.604.ACT	>67.413.AGA	>67.517.AGC	>67.475.AGG	>67.426.AGT	>67.382.ATA	>67.343.ATC	>67.508.ATG	>67.279.ATT	>67.159.CAA	>67.110.CAC	>67.804.CAG	>67.160.CAT	>67.343.CCA	>67.611.CCC	>67.621.CCG	>67.508.CCT	>67.626.CGA	>67.610.CGC	>67.462.CGG	>67.924.CGT	>67.505.CTA	>67.265.CTC	>67.108.CTG	>67.296.CTT	>67.130.GAA	>67.29.GAC	>67.194.GAG	>67.47.GAT	>67.103.GCA	>67.56.GCC	>67.59.GCG	>67.50.GCT	>67.260.GGA	>67.106.GGC	>67.345.GGG	>67.143.GGT	>67.83.GTA	>67.102.GTC	>67.193.GTG	>67.187.GTT	>67.274.TAA	>67.148.TAC
EIQIRYWFVNKRHKIKKS	ESQIGSWFRNKRHKIKKS	ERQIAQWFWNKRWKIKKS	ESQIISWFANKRFKIKKS	ELQIVNWFNNKRRKIKKS	EKQITAWFHNKRMKIKKS	EKQIVYWFDNKRRKIKKS	EQQIRMWFQNKRNKIKKS	EVQIFRWFANKRHKIKKS	ERQIRLWFSNKRTKIKKS	EGQISKWFENKRYKIKKS	ERQIKKWFENKRAKIKKS	ERQIVSWFANKRQKIKKS	ELQIALWFGNKRVKIKKS	EHQIRWWFQNKRWKIKKS	EQQIRVWFQNKRAKIKKS	ERQIMYWFQNKRSKIKKS	EVQISQWFRNKRRKIKKS	EFQITCWFYNKRSKIKKS	EKQILTWFSNKRRKIKKS	EMQITHWFQNKRKKIKKS	EVQICRWFENKRRKIKKS	ETQIVNWFSNKRKKIKKS	EKQINDWFSNKRKKIKKS	ESQIFNWFANKRRKIKKS	EAQIGYWFSNKRKKIKKS	ERQI_FWFVNKRTKIKKS	EAQIGNWFSNKRRKIKKS	ELQISYWFSNKRKKIKKS	EVQIRYWFSNKRRKIKKS	EVQITYWFQNKRRKIKKS	ERQIAYWFGNKRKKIKKS	EHQILRWFQNKRWKIKKS	ETQITRWFRNKRWKIKKS	ETQIQRWFWNKRYKIKKS	ESQIAKWFVNKRFKIKKS	EAQIVRWFQNKRFKIKKS	EDQIWVWFKNKRYKIKKS	EFQINDWFRNKRYKIKKS	EKQIQDWFRNKRYKIKKS	EVQISKWFDNKRMKIKKS	EYQISKWFNNKRVKIKKS	EKQINKWFENKRRKIKKS	EKQINKWFDNKRVKIKKS	ERQIGRWFQNKRSKIKKS	EGQIMKWFRNKRYKIKKS	EDQIATWFQNKRYKIKKS	EYQIERWFGNKRYKIKKS	ERQIMVWFCNKRAKIKKS	EYQICRWFINKRFKIKKS
>68.401.AAA	>68.186.AAC	>68.490.AAG	>68.461.AAT	>68.444.ACA	>68.544.ACC	>68.448.ACG	>68.580.ACT	>68.410.AGA	>68.512.AGC	>68.472.AGG	>68.425.AGT	>68.379.ATA	>68.341.ATC	>68.505.ATG	>68.279.ATT	>68.156.CAA	>68.109.CAC	>68.802.CAG	>68.160.CAT	>68.340.CCA	>68.609.CCC	>68.614.CCG	>68.498.CCT	>68.623.CGA	>68.602.CGC	>68.455.CGG	>68.914.CGT	>68.500.CTA	>68.258.CTC	>68.106.CTG	>68.288.CTT	>68.129.GAA	>68.29.GAC	>68.191.GAG	>68.46.GAT	>68.102.GCA	>68.55.GCC	>68.59.GCG	>68.49.GCT	>68.252.GGA	>68.106.GGC	>68.343.GGG	>68.143.GGT	>68.82.GTA	>68.102.GTC	>68.192.GTG	>68.183.GTT	>68.270.TAA	>68.148.TAC
ERQIVTWFANKRFKIKKS	ERQISSWFRNKRHKIKKS	EVQIMQWFWNKRFKIKKS	EEQILQWFVNKRGKIKKS	ELQIVTWFFNKRFKIKKS	EKQIKNWFENKRKKIKKS	ERQIMTWFQNKRNKIKKS	EWQIYRWFKNKRFKIKKS	ELQISRWFWNKRWKIKKS	EIQIMRWFSNKRVKIKKS	EPQIEGWFSNKRSKIKKS	EKQIRAWFQNKRFKIKKS	EEQIGEWFRNKREKIKKS	ELQIWNWFRNKRAKIKKS	EAQIETWFANKRCKIKKS	ESQIRVWFQNKRQKIKKS	EMQILYWFQNKRRKIKKS	EAQIRMWFSNKRRKIKKS	GLNDLRWFRNKRGKIKKS	ELQIMMWFSNKRRKIKKS	EKQIVTWFQNKRKKIKKS	ELQIATWFSNKRKKIKKS	EVQITNWFSNKRKKIKKS	ERQISDWFGNKRKKIKKS	ERQIMDWFSNKRRKIKKS	EMQIMHWFSNKRRKIKKS	EKQIAHWFENKRRKIKKS	EKQILMWFSNKRRKIKKS	EMQISFWFSNKRKKIKKS	EQQIRYWFSNKRKKIKKS	EKQIQYWFWNKRKKIKKS	EVQIMYWFANKRRKIKKS	EDQIFNWFKNKRWKIKKS	ESQIGRWFRNKRFKIKKS	EGQINRWFWNKRYKIKKS	EWQIVRWFSNKRYKIKKS	EKQIVKWFQNKRRKIKKS	ERQIVGWFKNKRFKIKKS	EAQIQDWFRNKRYKIKKS	EIQIQVWFKNKRWKIKKS	ERQIMKWFDNKRFKIKKS	ESQIMKWFSNKRGKIKKS	EMQISKWFENKRRKIKKS	EKQIVKWFSNKRMKIKKS	EVQIMRWFQNKRAKIKKS	EYQILRWFANKRFKIKKS	EHQILRWFENKRYKIKKS	ERQIEKWFSNKRFKIKKS	ETQIATWFVNKRAKIKKS	ESQIRIWFSNKRAKIKKS
>69.401.AAA	>69.185.AAC	>69.481.AAG	>69.459.AAT	>69.444.ACA	>69.525.ACC	>69.446.ACG	>69.555.ACT	>69.410.AGA	>69.512.AGC	>69.471.AGG	>69.425.AGT	>69.378.ATA	>69.339.ATC	>69.502.ATG	>69.275.ATT	>69.155.CAA	>69.109.CAC	>69.795.CAG	>69.160.CAT	>69.339.CCA	>69.609.CCC	>69.606.CCG	>69.490.CCT	>69.603.CGA	>69.598.CGC	>69.450.CGG	>69.901.CGT	>69.499.CTA	>69.248.CTC	>69.98.CTG	>69.285.CTT	>69.128.GAA	>69.29.GAC	>69.191.GAG	>69.45.GAT	>69.102.GCA	>69.54.GCC	>69.59.GCG	>69.48.GCT	>69.244.GGA	>69.106.GGC	>69.341.GGG	>69.142.GGT	>69.82.GTA	>69.100.GTC	>69.191.GTG	>69.183.GTT	>69.270.TAA	>69.147.TAC
ERQIHYWFVNKRFKIKKS	EKQIGQWFRNKRCKIKKS	EKQISQWFWNKRFKIKKS	ERQIMGWFNNKRFKIKKS	EKQIMQWFQNKRRKIKKS	EVQIQGWF_NKRIKIKKS	EKQIKYWFENKRRKIKKS	ELQIYYWFKNKRFKIKKS	ERQISRWFWNKRYKIKKS	EKQILRWFNNKRVKIKKS	EGQIAKWFENKRRKIKKS	ERQISKWFENKRWKIKKS	ERQISTWFANKRVKIKKS	EAQIGTWFANKRRKIKKS	ERQIFYWFQNKRHKIKKS	EKQIKLWFQNKRQKIKKS	EIQISYWFSNKRRKIKKS	EQQIAQWFRNKRRKIKKS	ETQIQHWFWNKRRKIKKS	ERQIRDWFGNKRRKIKKS	EVQITYWFQNKRKKIKKS	EKQILNWFSNKRKKIKKS	ELQITNWFCNKRKKIKKS	EKQIMNWFGNKRKKIKKS	ERQIIYWFQNKRSKIKKS	ELQIACWFSNKRRKIKKS	EKQILYWFENKRRKIKKS	EVQIGWWFNNKRRKIKKS	ETQISFWFSNKRKKIKKS	ESQIMWWFSNKRKKIKKS	ERQILYWFQNKRKKIKKS	EVQIMTWFSNKRKKIKKS	EKQIFAWFKNKRWKIKKS	EEQIRRWFRNKRWKIKKS	ERQINRWFWNKRYKIKKS	EEQISHWFRNKRWKIKKS	EEQIGRWFQNKRFKIKKS	EEQIKLWFKNKRYKIKKS	ERQISDWFRNKRLKIKKS	ERQIWNWFRNKRFKIKKS	EQQIYKWFDNKRQKIKKS	ESQILKWFNNKRQKIKKS	ERQISKWFENKRIKIKKS	EFQILKWFSNKRFKIKKS	ERQIGRWFQNKRFKIKKS	ESQILRWFGNKRFKIKKS	ERQIMRWFENKRWKIKKS	EAQILHWFSNKRYKIKKS	ERQIITWFANKRAKIKKS	EKQISRWFINKRVKIKKS
>70.398.AAA	>70.185.AAC	>70.479.AAG	>70.448.AAT	>70.438.ACA	>70.524.ACC	>70.443.ACG	>70.540.ACT	>70.400.AGA	>70.507.AGC	>70.466.AGG	>70.423.AGT	>70.375.ATA	>70.334.ATC	>70.500.ATG	>70.275.ATT	>70.155.CAA	>70.109.CAC	>70.769.CAG	>70.158.CAT	>70.334.CCA	>70.609.CCC	>70.604.CCG	>70.485.CCT	>70.588.CGA	>70.596.CGC	>70.445.CGG	>70.898.CGT	>70.498.CTA	>70.236.CTC	>70.91.CTG	>70.284.CTT	>70.128.GAA	>70.29.GAC	>70.188.GAG	>70.45.GAT	>70.99.GCA	>70.52.GCC	>70.58.GCG	>70.48.GCT	>70.239.GGA	>70.105.GGC	>70.341.GGG	>70.141.GGT	>70.81.GTA	>70.100.GTC	>70.178.GTG	>70.181.GTT	>70.268.TAA	>70.146.TAC
ERQIAQWFWNKRFKIKKS	ERQISAWFRNKRFKIKKS	EAQIMQWFWNKRWKIKKS	ERQICTWFSNKRHKIKKS	ERQIMNWFNNKRRKIKKS	ETQIINWFNNKRKKIKKS	ETQITHWFENKRRKIKKS	ENQIPYWFVNKRSKIKKS	ENQIFRWFANKRSKIKKS	ERQISRWFNNKRVKIKKS	EKQIMKWFENKRWKIKKS	EGQIKKWFENKRAKIKKS	EKQIKVWFNNKRSKIKKS	EVQIVVWFHNKRIKIKKS	EVQITYWFQNKRTKIKKS	EKQIKNWFQNKRNKIKKS	EQQILTWFANKRRKIKKS	EHQIRMWFSNKRRKIKKS	EGQIHLWFFNKRAKIKKS	EKQIGDWFSNKRRKIKKS	EKQISNWFANKRKKIKKS	EKQITTWFSNKRKKIKKS	ERQIRYWFENKRRKIKKS	EMQISNWFSNKRKKIKKS	ESQIFNWFSNKRRKIKKS	EVQIGYWFSNKRRKIKKS	EKQINRWFENKRRKIKKS	ERQIAMWFGNKRRKIKKS	ETQIRFWFSNKRKKIKKS	ELQINNWFKNKRKKIKKS	ETQIYNWFQNKRKKIKKS	ESQINNWFGNKRRKIKKS	EKQIERWFQNKRWKIKKS	EEQINRWFRNKRWKIKKS	EVQIQRWFWNKRYKIKKS	EVQIMHWFRNKRYKIKKS	ERQITKWFQNKRRKIKKS	EGQIRAWFKNKRYKIKKS	EKQITDWFRNKRCKIKKS	EFQIGNWFRNKRYKIKKS	ESQIGKWFDNKRYKIKKS	EMQIMKWFNNKRSKIKKS	EAQILKWFENKRRKIKKS	EAQIGKWFNNKRQKIKKS	EWQINKWFQNKRTKIKKS	EVQILKWFRNKRWKIKKS	ESQIAKWFENKRYKIKKS	EKQIRLWFSNKRYKIKKS	ERQIMVWFVNKRAKIKKS	EEQIRIWFSNKRAKIKKS
>71.397.AAA	>71.184.AAC	>71.478.AAG	>71.446.AAT	>71.438.ACA	>71.520.ACC	>71.443.ACG	>71.539.ACT	>71.397.AGA	>71.503.AGC	>71.457.AGG	>71.423.AGT	>71.374.ATA	>71.333.ATC	>71.494.ATG	>71.273.ATT	>71.155.CAA	>71.108.CAC	>71.766.CAG	>71.157.CAT	>71.332.CCA	>71.607.CCC	>71.602.CCG	>71.482.CCT	>71.588.CGA	>71.592.CGC	>71.415.CGG	>71.892.CGT	>71.497.CTA	>71.229.CTC	>71.84.CTG	>71.282.CTT	>71.126.GAA	>71.28.GAC	>71.182.GAG	>71.44.GAT	>71.98.GCA	>71.52.GCC	>71.57.GCG	>71.48.GCT	>71.235.GGA	>71.103.GGC	>71.337.GGG	>71.141.GGT	>71.81.GTA	>71.99.GTC	>71.175.GTG	>71.180.GTT	>71.264.TAA	>71.146.TAC
EKQIKMWFVNKRHKIKKS	ECQIGTWFRNKRFKIKKS	ERQISSWFTNKRFKIKKS	EQQISQWFANKRFKIKKS	EKQIIAWFHNKRTKIKKS	EKQITCWFHNKRTKIKKS	ERQIINWFENKRRKIKKS	EKQIKNWFQNKRKKIKKS	EVQIFRWFANKRWKIKKS	EKQIARWFSNKRVKIKKS	ETQISKWFENKRAKIKKS	EGQIMKWFSNKRFKIKKS	ERQIAQWFANKRVKIKKS	EAQIRIWFINKRGKIKKS	ENQIKYWFQNKRTKIKKS	EGQIRVWFQNKRSKIKKS	ELQIHYWFSNKRRKIKKS	EGQINMWFRNKRRKIKKS	ELQIPVWFKNKRIKIKKS	EKQISMWFSNKRRKIKKS	EVQITNWFSNKRKKIKKS	ELQILTWFSNKRKKIKKS	EMQITNWFQNKRKKIKKS	ELQIAYWFSNKRKKIKKS	EYQIHNWFANKRVKIKKS	EVQIRYWFSNKRMKIKKS	EKQITYWFENKRRKIKKS	EKQIGQWFNNKRRKIKKS	EVQIHNWFANKRRKIKKS	ETQIINWFKNKRKKIKKS	EKQIRYWFQNKRKKIKKS	ERQISNWFGNKRKKIKKS	ELQIFHWFKNKRSKIKKS	EGQIERWFRNKRYKIKKS	ELQIMRWFWNKRWKIKKS	EIQIAHWFRNKRWKIKKS	ENQITRWFQNKRFKIKKS	EGQIGRWFKNKRYKIKKS	EYQIMDWFRNKRYKIKKS	EVQITDWFRNKRYKIKKS	ELQIVKWFDNKRQKIKKS	ETQICKWFNNKRAKIKKS	ERQISKWFENKRGKIKKS	EYQILKWFSNKRSKIKKS	EYQIARWFANKRAKIKKS	EAQIIKWFKNKRYKIKKS	EKQINKWFENKRLKIKKS	EGQINRWFANKRYKIKKS	ERQIQVWFCNKRAKIKKS	EEQIRVWFSNKRSKIKKS
>72.395.AAA	>72.183.AAC	>72.470.AAG	>72.444.AAT	>72.427.ACA	>72.517.ACC	>72.441.ACG	>72.536.ACT	>72.395.AGA	>72.502.AGC	>72.453.AGG	>72.422.AGT	>72.373.ATA	>72.333.ATC	>72.493.ATG	>72.270.ATT	>72.154.CAA	>72.108.CAC	>72.764.CAG	>72.157.CAT	>72.331.CCA	>72.602.CCC	>72.593.CCG	>72.481.CCT	>72.579.CGA	>72.592.CGC	>72.408.CGG	>72.890.CGT	>72.496.CTA	>72.227.CTC	>72.81.CTG	>72.281.CTT	>72.123.GAA	>72.28.GAC	>72.181.GAG	>72.44.GAT	>72.98.GCA	>72.50.GCC	>72.57.GCG	>72.46.GCT	>72.227.GGA	>72.101.GGC	>72.335.GGG	>72.140.GGT	>72.80.GTA	>72.99.GTC	>72.167.GTG	>72.179.GTT	>72.262.TAA	>72.145.TAC
EVQIRYWFVNKRHKIKKS	ESQISSWFRNKRFKIKKS	EKQIVQWFWNKRFKIKKS	EMQISTWFSNKRFKIKKS	ERQISNWFLNKRRKIKKS	ESQIANWFHNKRVKIKKS	EKQISQWFSNKRGKIKKS	ETQIRAWFHNKRMKIKKS	EHQIFRWFANKRWKIKKS	EKQISRWFNNKRVKIKKS	EKQIQKWFENKRRKIKKS	ERQIRKWFENKRHKIKKS	ERQISSWFSNKRSKIKKS	EVQIYWWFNNKR_KIKKS	ERQIVFWFQNKRWKIKKS	EVQILVWFQNKRSKIKKS	ESQIMYWFQNKRRKIKKS	EAQIGMWFRNKRRKIKKS	EKQISYWFWNKRRKIKKS	EGQIGNWFSNKRRKIKKS	EKQILTWFQNKRKKIKKS	ESQIGNWFSNKRKKIKKS	EKQIVYWFENKRKKIKKS	EQQISNWFSNKRKKIKKS	EVQIFYWFANKRAKIKKS	ESQIRMWFSNKRRKIKKS	EKQIRYWFENKRRKIKKS	EVQIACWFSNKRRKIKKS	EMQIVYWFANKRKKIKKS	ERQIYHWFQNKRKKIKKS	EGQIRCWFENKRKKIKKS	ESQIRYWFANKRKKIKKS	EEQITNWFKNKRWKIKKS	EGQIRRWFRNKRWKIKKS	EVQIMRWFWNKRYKIKKS	EVQIMHWFRNKRWKIKKS	EPQIAKWFQNKRRKIKKS	EKQICLWFKNKRFKIKKS	ERQILDWFRNKRYKIKKS	EMQIKGWFKNKRYKIKKS	EGQIRKWFDNKRWKIKKS	EQQIVKWFSNKRQKIKKS	EYQISKWFENKRRKIKKS	EGQIRKWFDNKRQKIKKS	ECQIGKWFQNKRNKIKKS	ELQILKWFANKRFKIKKS	EQQIVKWFMNKRYKIKKS	EGQIGSWFSNKRYKIKKS	EKQIGIWFVNKRAKIKKS	EEQIRVWFSNKRVKIKKS
>73.393.AAA	>73.182.AAC	>73.466.AAG	>73.441.AAT	>73.426.ACA	>73.513.ACC	>73.431.ACG	>73.532.ACT	>73.389.AGA	>73.499.AGC	>73.452.AGG	>73.422.AGT	>73.371.ATA	>73.323.ATC	>73.491.ATG	>73.267.ATT	>73.153.CAA	>73.108.CAC	>73.761.CAG	>73.156.CAT	>73.328.CCA	>73.598.CCC	>73.583.CCG	>73.476.CCT	>73.577.CGA	>73.588.CGC	>73.402.CGG	>73.874.CGT	>73.495.CTA	>73.221.CTC	>73.81.CTG	>73.277.CTT	>73.123.GAA	>73.28.GAC	>73.177.GAG	>73.44.GAT	>73.97.GCA	>73.49.GCC	>73.56.GCG	>73.46.GCT	>73.221.GGA	>73.100.GGC	>73.331.GGG	>73.140.GGT	>73.80.GTA	>73.98.GTC	>73.166.GTG	>73.178.GTT	>73.258.TAA	>73.142.TAC
EKQITYWFVNKRFKIKKS	EKQITAWFRNKRFKIKKS	EVQIKQWFWNKRYKIKKS	EKQIYNWFNNKRHKIKKS	EKQIMSWFHNKRSKIKKS	EEQILPWFYNKRVKIKKS	ESQIVRWFENKRRKIKKS	EKQISNWFHNKRTKIKKS	EEQIFRWFANKRWKIKKS	EKQICRWFNNKRVKIKKS	EAQITKWFENKRYKIKKS	EKQIQKWFENKRAKIKKS	ERQISYWFNNKRAKIKKS	ESQISDWFVNKRPKIKKS	ERQIVIWFENKRFKIKKS	ERQIGVWFQNKRSKIKKS	ELQIMFWFQNKRRKIKKS	EVQIRMWFSNKRRKIKKS	EYQISCWFWNKRRKIKKS	ELQISHWFSNKRRKIKKS	EMQIANWFANKRKKIKKS	EAQIHNWFSNKRKKIKKS	ELQIQYWFENKRKKIKKS	ERQITNWFSNKRKKIKKS	EKQIFNWFANKRAKIKKS	EMQIRDWFSNKRRKIKKS	ETQIVRWFENKRRKIKKS	EKQILDWFSNKRRKIKKS	EIQITHWFNNKRKKIKKS	ETQIRFWFANKRKKIKKS	ESQIRDWFQNKRNKIKKS	ERQISYWFGNKRKKIKKS	ERQIFDWFKNKRHKIKKS	ERQIVRWFRNKRWKIKKS	EKQISVWFWNKRYKIKKS	EEQICVWFRNKRYKIKKS	EEQITKWFQNKRAKIKKS	EGQIRLWFKNKRYKIKKS	EGQISDWFRNKRYKIKKS	ERQIIDWFRNKRYKIKKS	EGQILKWFDNKRQKIKKS	EDQIEQWFFNKRGKIKKS	EGQISKWFENKRWKIKKS	EIQIGKWFNNKRFKIKKS	EGQILRWFQNKRLKIKKS	EGQISRWFGNKRFKIKKS	EKQIMGWFQNKRYKIKKS	ERQIRVWFANKRHKIKKS	ERQICLWFRNKRAKIKKS	EQQIRVWFSNKRAKIKKS
>74.390.AAA	>74.181.AAC	>74.459.AAG	>74.439.AAT	>74.416.ACA	>74.505.ACC	>74.425.ACG	>74.529.ACT	>74.379.AGA	>74.498.AGC	>74.448.AGG	>74.421.AGT	>74.369.ATA	>74.320.ATC	>74.491.ATG	>74.266.ATT	>74.152.CAA	>74.107.CAC	>74.754.CAG	>74.156.CAT	>74.327.CCA	>74.593.CCC	>74.583.CCG	>74.472.CCT	>74.572.CGA	>74.584.CGC	>74.398.CGG	>74.827.CGT	>74.491.CTA	>74.212.CTC	>74.81.CTG	>74.275.CTT	>74.122.GAA	>74.28.GAC	>74.176.GAG	>74.44.GAT	>74.93.GCA	>74.49.GCC	>74.56.GCG	>74.46.GCT	>74.218.GGA	>74.98.GGC	>74.331.GGG	>74.140.GGT	>74.80.GTA	>74.96.GTC	>74.165.GTG	>74.176.GTT	>74.256.TAA	>74.142.TAC
ERQITSWFNNKRHKIKKS	EVQISSWFRNKRHKIKKS	ERQISQWFWNKRHKIKKS	EAQISTWFANKRFKIKKS	ENQITNWFNNKRRKIKKS	EKQILNWFANKRKKIKKS	EVQITQWFENKRTKIKKS	EAQINSWFHNKRSKIKKS	ETQIFRWFANKRWKIKKS	EKQIGRWFNNKRVKIKKS	ERQIMKWFENKRTKIKKS	EPQISKWFENKRWKIKKS	EKQIATWFANKRVKIKKS	EVQIRMWFANKRFKIKKS	ERQIKTWFQNKRDKIKKS	ERQIYVWFQNKRQKIKKS	EGQIHHWFANKRRKIKKS	EVQIFDWFRNKRRKIKKS	EIQISRWFWNKRRKIKKS	ELQIMTWFSNKRRKIKKS	ERQILTWFQNKRKKIKKS	ETQINNWFSNKRKKIKKS	EKQIGYWFENKRKKIKKS	EMQINNWFSNKRKKIKKS	ERQIGDWFANKRAKIKKS	ERQILMWFSNKRRKIKKS	EVQISHWFENKRRKIKKS	EKQILYWFGNKRRKIKKS	ERQIFMWFSNKRKKIKKS	ELQIRYWFANKRKKIKKS	EIQIVYWFQNKRSKIKKS	ERQIGFWFSNKRRKIKKS	EMQIERWFQNKRYKIKKS	EVQITRWFRNKRWKIKKS	EKQIMRWFWNKRWKIKKS	ERQIGKWFINKRWKIKKS	ERQITKWFQNKRRKIKKS	ESQIRLWFKNKRYKIKKS	ERQILDWFRNKRAKIKKS	ETQIADWFRNKRYKIKKS	ELQIAKWFDNKRQKIKKS	ERQILKWFSNKRVKIKKS	ESQILKWFENKRWKIKKS	ENQIKKWFDNKRQKIKKS	ELQILKWFQNKRNKIKKS	ERQIVKWFANKRAKIKKS	EQQIMCWFQNKRTKIKKS	EVQIVRWFGNKRFKIKKS	EKQIMVWFANKRAKIKKS	ENQIRVWFSNKRAKIKKS
>75.385.AAA	>75.181.AAC	>75.453.AAG	>75.437.AAT	>75.412.ACA	>75.502.ACC	>75.424.ACG	>75.526.ACT	>75.378.AGA	>75.490.AGC	>75.446.AGG	>75.418.AGT	>75.368.ATA	>75.310.ATC	>75.474.ATG	>75.263.ATT	>75.151.CAA	>75.107.CAC	>75.746.CAG	>75.155.CAT	>75.321.CCA	>75.583.CCC	>75.582.CCG	>75.470.CCT	>75.565.CGA	>75.583.CGC	>75.381.CGG	>75.823.CGT	>75.486.CTA	>75.207.CTC	>75.75.CTG	>75.272.CTT	>75.122.GAA	>75.28.GAC	>75.176.GAG	>75.44.GAT	>75.91.GCA	>75.48.GCC	>75.55.GCG	>75.46.GCT	>75.215.GGA	>75.91.GGC	>75.322.GGG	>75.139.GGT	>75.80.GTA	>75.96.GTC	>75.163.GTG	>75.173.GTT	>75.255.TAA	>75.141.TAC
EKQISYWFVNKRHKIKKS	ELQILSWFRNKRFKIKKS	ERQISQWFWNKRAKIKKS	ERQIASWFSNKRFKIKKS	ERQIHSWFANKRHKIKKS	EAQITTWFSNKRKKIKKS	EKQIRYWFDNKRRKIKKS	ENQILRWFTNKR_KIKKS	ERQISLWFCNKRYKIKKS	EKQIARWFENKRYKIKKS	EKQIRKWFENKRGKIKKS	EKQILRWFENKRYKIKKS	ECQITVWFRNKRAKIKKS	EFQIQHWFLNKRDKIKKS	ERQIMAWFQNKRNKIKKS	ESQIARWFHNKRWKIKKS	ELQILYWFQNKRRKIKKS	ELQIAMWFRNKRRKIKKS	ELQIQIWFGNKRAKIKKS	ELQIAWWFSNKRRKIKKS	EVQIMFWFQNKRKKIKKS	ERQIMTWFSNKRKKIKKS	EKQIMNWFQNKRKKIKKS	ERQILDWFSNKRKKIKKS	ESQIHYWFANKRSKIKKS	EMQIRDWFSNKRRKIKKS	EKQITRWFENKRRKIKKS	EVQIVNWFSNKRRKIKKS	ERQITMWFANKRKKIKKS	EVQIAYWFSNKRKKIKKS	ENQITFWFQNKRKKIKKS	EFQIRYWFGNKRKKIKKS	EAQIQRWFQNKRWKIKKS	EGQIGRWFRNKRHKIKKS	EGQITRWFWNKRYKIKKS	EKQIMRWFLNKRWKIKKS	EKQIIKWFQNKRMKIKKS	ETQIRLWFKNKRFKIKKS	EAQISDWFRNKRAKIKKS	EKQIMQWFKNKRYKIKKS	EEQIGKWFDNKRQKIKKS	EVQISKWFGNKRMKIKKS	EHQILKWFENKRRKIKKS	EKQISKWFNNKRTKIKKS	EEQICRWFQNKRQKIKKS	EKQIEKWFRNKRWKIKKS	EWQITRWFENKRYKIKKS	ERQIMRWFGNKRYKIKKS	ERQICLWFRNKRAKIKKS	EEQIRVWFSNKRAKIKKS
>76.385.AAA	>76.181.AAC	>76.450.AAG	>76.437.AAT	>76.412.ACA	>76.496.ACC	>76.420.ACG	>76.524.ACT	>76.375.AGA	>76.482.AGC	>76.444.AGG	>76.417.AGT	>76.366.ATA	>76.306.ATC	>76.471.ATG	>76.263.ATT	>76.151.CAA	>76.107.CAC	>76.745.CAG	>76.154.CAT	>76.318.CCA	>76.578.CCC	>76.567.CCG	>76.461.CCT	>76.558.CGA	>76.555.CGC	>76.373.CGG	>76.821.CGT	>76.477.CTA	>76.198.CTC	>76.74.CTG	>76.270.CTT	>76.122.GAA	>76.28.GAC	>76.174.GAG	>76.44.GAT	>76.91.GCA	>76.48.GCC	>76.54.GCG	>76.46.GCT	>76.207.GGA	>76.90.GGC	>76.318.GGG	>76.138.GGT	>76.80.GTA	>76.95.GTC	>76.161.GTG	>76.172.GTT	>76.251.TAA	>76.139.TAC
ERQITSWFNNKRHKIKKS	EAQIGAWFRNKRFKIKKS	EHQIQQWFWNKRHKIKKS	ERQIDNWFANKRFKIKKS	ERQIKTWFQNKRRKIKKS	EQQIANWFHNKRMKIKKS	EVQIKHWFENKRRKIKKS	EKQITSWFHNKRMKIKKS	EKQISRWFWNKRWKIKKS	EMQIPSWFFNKRNKIKKS	EMQITEWFKNKRDKIKKS	ERQITKWFENKRFKIKKS	EKQIHYWFCNKRVKIKKS	ERQIGGWFVNKRSKIKKS	ELQIGVWFRNKRLKIKKS	EYQIKVWFQNKRSKIKKS	ERQIADWFANKRRKIKKS	ETQIGMWFRNKRRKIKKS	EQQISHWFWNKRRKIKKS	EKQITQWFSNKRRKIKKS	ELQILTWFQNKRKKIKKS	EIQIACWFSNKRKKIKKS	ESQIMNWFQNKRKKIKKS	ELQIANWFSNKRKKIKKS	EDQIHNWFANKRRKIKKS	EKQIAHWFSNKRRKIKKS	EKQIAYWFENKRKKIKKS	EDQIGNWFSNKRRKIKKS	EKQIAYWFANKRQKIKKS	EGQISMWFANKRKKIKKS	ERQIQNWFENKRRKIKKS	ERQILDWFGNKRKKIKKS	EVQIKRWFQNKRWKIKKS	EGQIERWFRNKRWKIKKS	EEQIMRWFWNKRYKIKKS	EVQIEKWFVNKRYKIKKS	EKQIAKWFQNKRRKIKKS	EEQIRMWFKNKRFKIKKS	EPQIADWFRNKRYKIKKS	EAQIVDWFRNKRYKIKKS	ESQISKWFDNKRVKIKKS	ERQIIKWFNNKRQKIKKS	ETQILKWFENKRRKIKKS	ERQISKWFDNKRMKIKKS	EVQIYNWFRNKRLKIKKS	EIQISKWFRNKRFKIKKS	ESQITRWFENKRYKIKKS	ERQIDRWFGNKRYKIKKS	ERQIVVWFYNKRAKIKKS	EEQIRLWFSNKRYKIKKS
>77.382.AAA	>77.179.AAC	>77.449.AAG	>77.435.AAT	>77.401.ACA	>77.484.ACC	>77.404.ACG	>77.520.ACT	>77.375.AGA	>77.479.AGC	>77.441.AGG	>77.416.AGT	>77.365.ATA	>77.305.ATC	>77.461.ATG	>77.263.ATT	>77.148.CAA	>77.106.CAC	>77.727.CAG	>77.153.CAT	>77.318.CCA	>77.578.CCC	>77.567.CCG	>77.460.CCT	>77.557.CGA	>77.541.CGC	>77.361.CGG	>77.776.CGT	>77.470.CTA	>77.195.CTC	>77.71.CTG	>77.270.CTT	>77.121.GAA	>77.28.GAC	>77.173.GAG	>77.44.GAT	>77.89.GCA	>77.48.GCC	>77.54.GCG	>77.45.GCT	>77.204.GGA	>77.90.GGC	>77.308.GGG	>77.137.GGT	>77.80.GTA	>77.92.GTC	>77.161.GTG	>77.171.GTT	>77.249.TAA	>77.137.TAC
ELQIRYWFANKRHKIKKS	ESQIVDWFRNKRHKIKKS	EKQIGQWFWNKRFKIKKS	EKQINSWFSNKRFKIKKS	ETQIVRWFTNKRCKIKKS	EMQIERWFDNKRLKIKKS	ERQIRYWFDNKRRKIKKS	ERQILSWFHNKRMKIKKS	ETQIFRWFANKRHKIKKS	EVQITRWFSNKRVKIKKS	EKQIVKWFENKRGKIKKS	EKQITKWFENKRYKIKKS	ERQILSWFSNKRSKIKKS	EGQITNWFRNKRTKIKKS	ERQITYWFQNKRAKIKKS	EEQIRVWFQNKRAKIKKS	ELQIAYWFQNKRRKIKKS	EVQIVYWFSNKRRKIKKS	EKQISWWFWNKRRKIKKS	EWQITNWFSNKRRKIKKS	EKQITLWFQNKRKKIKKS	EKQIARWFENKRRKIKKS	EKQISNWFENKRKKIKKS	ETQITNWFSNKRKKIKKS	ERQIKYWFQNKRVKIKKS	ERQISYWFSNKRQKIKKS	EKQITMWFENKRRKIKKS	EIQITNWFSNKRRKIKKS	ELQIMYWFANKRKKIKKS	ELQIRYWFSNKRKKIKKS	EEQIGSWFLNKRSKIKKS	EKQIRDWFGNKRRKIKKS	ERQIVFWFKNKRYKIKKS	EGQIERWFRNKRYKIKKS	ELQIMRWFWNKRWKIKKS	ENQIARWFLNKRYKIKKS	EQQILKWFQNKRSKIKKS	EGQIRVWFKNKRFKIKKS	ERQIMDWFRNKRFKIKKS	EGQIRVWFKNKRFKIKKS	EKQILKWFDNKRSKIKKS	ERQIGKWFNNKRLKIKKS	ERQIGKWFENKRRKIKKS	EKQIQKWFDNKRYKIKKS	EVQISRWFQNKRGKIKKS	EYQIRRWFANKRLKIKKS	EPQILRWFQNKRHKIKKS	EAQIVNWFRNKRWKIKKS	ERQIGIWFANKRAKIKKS	EVQIRIWFSNKRAKIKKS
>78.378.AAA	>78.178.AAC	>78.446.AAG	>78.425.AAT	>78.400.ACA	>78.479.ACC	>78.400.ACG	>78.510.ACT	>78.374.AGA	>78.466.AGC	>78.431.AGG	>78.410.AGT	>78.365.ATA	>78.303.ATC	>78.460.ATG	>78.258.ATT	>78.147.CAA	>78.105.CAC	>78.721.CAG	>78.153.CAT	>78.318.CCA	>78.573.CCC	>78.564.CCG	>78.421.CCT	>78.552.CGA	>78.540.CGC	>78.357.CGG	>78.749.CGT	>78.468.CTA	>78.193.CTC	>78.71.CTG	>78.268.CTT	>78.117.GAA	>78.28.GAC	>78.171.GAG	>78.43.GAT	>78.84.GCA	>78.46.GCC	>78.54.GCG	>78.45.GCT	>78.204.GGA	>78.89.GGC	>78.308.GGG	>78.137.GGT	>78.80.GTA	>78.91.GTC	>78.159.GTG	>78.166.GTT	>78.247.TAA	>78.137.TAC
EKQIQYWFVNKRHKIKKS	ERQITSWFRNKRFKIKKS	ELQIKQWFWNKRFKIKKS	ERQIKCWFSNKRFKIKKS	EKQIQTWFWNKRRKIKKS	EWQIMGWFKNKRSKIKKS	EQQIKWWFENKRRKIKKS	ELQIKYWFENKRRKIKKS	ERQILTWFTNKRHKIKKS	ERQIMTWFSNKRVKIKKS	ERQIMKWFENKRTKIKKS	EKQIKKWFENKRQKIKKS	ERQIARWFANKRVKIKKS	E_QIGSWFANKRSKIKKS	EVQITYWFQNKRWKIKKS	EVQIKVWFQNKRSKIKKS	EKQIENWFANKRRKIKKS	ELQIAYWFSNKRRKIKKS	EDQISWWFWNKRRKIKKS	ESQIGYWFSNKRRKIKKS	ERQIMYWFQNKRKKIKKS	ELQIANWFSNKRKKIKKS	EVQIIYWFENKRKKIKKS	EEQIMNWFSNKRKKIKKS	EKQILNWFANKRKKIKKS	ERQIYMWFSNKRRKIKKS	ERQIMTWFENKRRKIKKS	ERQITHWFSNKRAKIKKS	ERQIHNWFANKRKKIKKS	ERQIVNWFRNKRRKIKKS	EKQITYWFENKRRKIKKS	ERQIVYWFGNKRAKIKKS	EKQIKRWFQNKRWKIKKS	EEQISRWFRNKRFKIKKS	ELQICRWFWNKRYKIKKS	EQQITRWFLNKRYKIKKS	EFQIFNWFRNKRSKIKKS	EYQIKVWFKNKRFKIKKS	ERQITDWFRNKRYKIKKS	EQQISDWFRNKRFKIKKS	EVQISKWFDNKRWKIKKS	ENQILKWFNNKRQKIKKS	EKQIGKWFENKRRKIKKS	EGQIAKWFDNKRWKIKKS	ETQISRWFQNKRSKIKKS	EYQIMRWFGNKRFKIKKS	ERQITRWFENKRAKIKKS	EHQIRRWFGNKRYKIKKS	RDADHRLVQEQRAKIKKS	EYQISRWFINKRFKIKKS
>79.372.AAA	>79.177.AAC	>79.443.AAG	>79.421.AAT	>79.399.ACA	>79.476.ACC	>79.400.ACG	>79.503.ACT	>79.373.AGA	>79.463.AGC	>79.430.AGG	>79.408.AGT	>79.362.ATA	>79.295.ATC	>79.456.ATG	>79.257.ATT	>79.145.CAA	>79.105.CAC	>79.713.CAG	>79.153.CAT	>79.318.CCA	>79.573.CCC	>79.558.CCG	>79.400.CCT	>79.550.CGA	>79.536.CGC	>79.330.CGG	>79.734.CGT	>79.462.CTA	>79.193.CTC	>79.71.CTG	>79.267.CTT	>79.115.GAA	>79.27.GAC	>79.170.GAG	>79.42.GAT	>79.83.GCA	>79.46.GCC	>79.53.GCG	>79.44.GCT	>79.199.GGA	>79.88.GGC	>79.304.GGG	>79.136.GGT	>79.79.GTA	>79.89.GTC	>79.157.GTG	>79.163.GTT	>79.246.TAA	>79.136.TAC
EGQIMRWFANKRFKIKKS	EHQISSWFRNKRHKIKKS	ELQIKQWFWNKRYKIKKS	ESQISSWFSNKRFKIKKS	EKQIATWFHNKRTKIKKS	ERQIANWFHNKRSKIKKS	EQQIRAWFKNKRYKIKKS	ESQITNWFHNKRMKIKKS	ECQIFRWFANKRWKIKKS	EQQIGRWFNNKRVKIKKS	EKQIAKWFENKRMKIKKS	EFQIRKWFENKRFKIKKS	EKQILVWFQNKRVKIKKS	EGQISIWFWNKRRKIKKS	ERQIKYWFQNKRWKIKKS	RTQIASWFLNKRLKIKKS	EVQIGYWFANKRRKIKKS	ENQIRMWFSNKRRKIKKS	EKQISHWFWNKRRKIKKS	EVQIGNWFSNKRRKIKKS	EKQILTWFQNKRKKIKKS	ELQILNWFSNKRKKIKKS	ERQIVYWFENKRKKIKKS	EKQIADWFSNKRKKIKKS	EKQIMYWFQNKRMKIKKS	ETQIAYWFSNKRRKIKKS	EEQITNWFENKRRKIKKS	ERQIYYWFSNKRAKIKKS	ERQIGYWFANKRSKIKKS	EKQIMFWFANKRKKIKKS	EKQIRHWFENKRKKIKKS	EMQISYWFGNKRKKIKKS	ELQIVKWFQNKRWKIKKS	ERQIDRWFRNKRFKIKKS	EVQINRWFWNKRYKIKKS	EEQICHWFRNKRYKIKKS	ERQIFDWFRNKRAKIKKS	ERQIMAWFKNKRFKIKKS	EKQILDWFRNKRYKIKKS	ELQIVTWFKNKRFKIKKS	EKQISKWFSNKREKIKKS	ERQIMKWFNNKRGKIKKS	EKQIAKWFENKRGKIKKS	EYQIAKWFSNKRCKIKKS	EVQINRWFQNKRVKIKKS	EMQISKWFRNKRAKIKKS	EKQIGKWFENKRRKIKKS	EQQIGRWFANKRFKIKKS	ERQINLWFANKRAKIKKS	EVQIMRWFINKRAKIKKS
>80.371.AAA	>80.174.AAC	>80.435.AAG	>80.418.AAT	>80.398.ACA	>80.476.ACC	>80.384.ACG	>80.488.ACT	>80.372.AGA	>80.459.AGC	>80.422.AGG	>80.408.AGT	>80.360.ATA	>80.295.ATC	>80.449.ATG	>80.257.ATT	>80.145.CAA	>80.105.CAC	>80.713.CAG	>80.151.CAT	>80.317.CCA	>80.572.CCC	>80.555.CCG	>80.387.CCT	>80.549.CGA	>80.530.CGC	>80.322.CGG	>80.723.CGT	>80.459.CTA	>80.192.CTC	>80.70.CTG	>80.263.CTT	>80.115.GAA	>80.27.GAC	>80.170.GAG	>80.41.GAT	>80.80.GCA	>80.46.GCC	>80.53.GCG	>80.44.GCT	>80.196.GGA	>80.88.GGC	>80.296.GGG	>80.136.GGT	>80.79.GTA	>80.89.GTC	>80.156.GTG	>80.160.GTT	>80.241.TAA	>80.136.TAC
ERQIYYWFVNKRFKIKKS	ERQINSWFRNKRFKIKKS	ERQISQWFWNKRCKIKKS	EGQIRSWFQNKRTKIKKS	EKQISSWFQNKRRKIKKS	ESQISSWFHNKRAKIKKS	ELQIKYWFENKRRKIKKS	EQQIVYWFHNKRVKIKKS	EKQIRVWFWNKRYKIKKS	EVQIMRWFNNKRVKIKKS	EKQITKWFDNKRSKIKKS	EKQIVKWFENKRFKIKKS	EKQICYWFNNKRVKIKKS	REPDPAVVREQGGKIKKS	EYQICRWFRNKRDKIKKS	EPQIMMWFPNKRWKIKKS	EQQIADWFANKRRKIKKS	EKQIMAWFSNKRRKIKKS	ESQISWWFWNKRRKIKKS	EVQIRNWFSNKRRKIKKS	ELQIVYWFQNKRKKIKKS	ERQIADWFSNKRKKIKKS	ETQIMDWFSNKRKKIKKS	ERQIVDWFSNKRKKIKKS	EKQIDYWFANKRAKIKKS	ERQIMSWFSNKRRKIKKS	EVQIRYWFENKRRKIKKS	EVQISNWFSNKRRKIKKS	EVQIAYWFANKRKKIKKS	ELQIRYWFGNKRKKIKKS	ESQILNWFQNKRKKIKKS	EVQIRDWFGNKRRKIKKS	EQQIARWFQNKRWKIKKS	EVQIVRWFRNKRFKIKKS	ELQINRWFWNKRYKIKKS	EGQITRWFLNKRYKIKKS	EYQIVLWFFNKRVKIKKS	ETQIQLWFKNKRYKIKKS	EVQINDWFRNKRYKIKKS	ERQIGDWFRNKRFKIKKS	ESQIRKWFDNKRTKIKKS	EWQIAKWFNNKRWKIKKS	EQQILKWFENKRRKIKKS	EKQIQKWFSNKREKIKKS	EKQILRWFQNKRSKIKKS	EAQIMKWFRNKRFKIKKS	ENQIARWFENKRYKIKKS	EQQIAKWFENKRYKIKKS	EYQIKVWFCNKRAKIKKS	ETQIRIWFSNKRAKIKKS
>81.369.AAA	>81.174.AAC	>81.435.AAG	>81.416.AAT	>81.396.ACA	>81.475.ACC	>81.374.ACG	>81.468.ACT	>81.370.AGA	>81.457.AGC	>81.416.AGG	>81.406.AGT	>81.359.ATA	>81.292.ATC	>81.447.ATG	>81.255.ATT	>81.145.CAA	>81.105.CAC	>81.706.CAG	>81.150.CAT	>81.316.CCA	>81.568.CCC	>81.550.CCG	>81.384.CCT	>81.547.CGA	>81.529.CGC	>81.321.CGG	>81.718.CGT	>81.459.CTA	>81.187.CTC	>81.63.CTG	>81.260.CTT	>81.114.GAA	>81.27.GAC	>81.166.GAG	>81.41.GAT	>81.78.GCA	>81.45.GCC	>81.52.GCG	>81.44.GCT	>81.192.GGA	>81.88.GGC	>81.290.GGG	>81.135.GGT	>81.79.GTA	>81.87.GTC	>81.154.GTG	>81.158.GTT	>81.240.TAA	>81.136.TAC
ELQIKYWFVNKRFKIKKS	EVQIAQWFRNKRFKIKKS	ERQIQQWFWNKRHKIKKS	ERQITSWFTNKRFKIKKS	ELQILNWFNNKRRKIKKS	EYQIRRWFKNKRYKIKKS	EPQIVNWFENKRRKIKKS	ERQISGWFHNKRMKIKKS	EAQIKVWFDNKRMKIKKS	EKQIRMWFSNKRVKIKKS	ERQIKKWFENKRQKIKKS	ERQIKKWFENKRQKIKKS	ECQIRSWFANKRSKIKKS	EAQIDYWFLNKRPKIKKS	EEQIARWFVNKRGKIKKS	ELQIKTWFQNKRSKIKKS	EMQIFWWFANKRRKIKKS	EKQILCWFSNKRRKIKKS	EKQISHWFWNKRRKIKKS	EKQIAQWFSNKRRKIKKS	ETQIHYWFANKRKKIKKS	ETQIVNWFSNKRKKIKKS	EVQIINWFQNKRKKIKKS	ESQIMNWFSNKRKKIKKS	EQQIFHWFSNKRRKIKKS	EKQITMWFSNKRSKIKKS	ESQITRWFENKRRKIKKS	ERQIAMWFSNKRRKIKKS	ETQIAFWFANKRRKIKKS	EVQIRFWFSNKRKKIKKS	ERQIANWFQNKRKKIKKS	ENQIVNWFGNKRRKIKKS	EVQINRWFQNKRWKIKKS	EVQITRWFRNKRWKIKKS	ERQISTWFWNKRYKIKKS	EKQITMWFRNKRYKIKKS	EMQIAKWFANKRQKIKKS	EAQIVRWFKNKRYKIKKS	EHQIADWFRNKRYKIKKS	ELQISDWFRNKRYKIKKS	EGQILKWFDNKRYKIKKS	EAQIMKWFSNKRQKIKKS	ERQILRWFENKRYKIKKS	ERQIMKWFSNKRVKIKKS	EVQIMRWFQNKRTKIKKS	ESQIQKWFRNKRWKIKKS	EGQISRWFENKRYKIKKS	ESQIRVWFSNKRYKIKKS	EIQIQRWFLNKRRKIKKS	ERQIRLWFSNKRAKIKKS
>82.367.AAA	>82.173.AAC	>82.434.AAG	>82.402.AAT	>82.395.ACA	>82.468.ACC	>82.363.ACG	>82.459.ACT	>82.368.AGA	>82.451.AGC	>82.416.AGG	>82.401.AGT	>82.358.ATA	>82.276.ATC	>82.430.ATG	>82.254.ATT	>82.144.CAA	>82.103.CAC	>82.696.CAG	>82.150.CAT	>82.315.CCA	>82.568.CCC	>82.549.CCG	>82.384.CCT	>82.544.CGA	>82.527.CGC	>82.315.CGG	>82.713.CGT	>82.454.CTA	>82.185.CTC	>82.59.CTG	>82.257.CTT	>82.112.GAA	>82.27.GAC	>82.165.GAG	>82.41.GAT	>82.78.GCA	>82.45.GCC	>82.52.GCG	>82.44.GCT	>82.188.GGA	>82.87.GGC	>82.288.GGG	>82.134.GGT	>82.79.GTA	>82.87.GTC	>82.150.GTG	>82.158.GTT	>82.238.TAA	>82.134.TAC
ELQIQYWFVNKRAKIKKS	ESQINDWFRNKRHKIKKS	EGQIRCWFKNKRVKIKKS	ERQINNWFTNKRFKIKKS	EKQILNWFNNKRRKIKKS	ERQITTWFSNKRKKIKKS	EVQIIHWFENKRRKIKKS	EVQITNWFVNKRSKIKKS	ERQIRYWFNNKRWKIKKS	ESQISRWFNNKRVKIKKS	EKQIRKWFENKRGKIKKS	EKQITFWFSNKRVKIKKS	ERQIAYWFNNKRAKIKKS	ERQIRMWFANKRWKIKKS	EKQIVYWFQNKRTKIKKS	EVQIIFWFRNKRAKIKKS	ELQIAYWFSNKRRKIKKS	EKQIMMWFSNKRRKIKKS	ESQISWWFWNKRRKIKKS	EFQIRDWFSNKRRKIKKS	EKQISNWFQNKRKKIKKS	EKQISNWFSNKRKKIKKS	ESQIRNWFENKRKKIKKS	EVQIMNWFANKRKKIKKS	EIQIRYWFANKRSKIKKS	EKQILTWFSNKRRKIKKS	EVQISHWFENKRRKIKKS	ERQILDWFSNKRRKIKKS	EWQIACWFANKRKKIKKS	EQQIRFWFSNKRKKIKKS	EKQITYWFQNKRKKIKKS	ERQITYWFGNKRNKIKKS	ETQIVRWFQNKRWKIKKS	ELQITRWFRNKRWKIKKS	ETQISQWFWNKRYKIKKS	EQQIIRWFCNKRYKIKKS	EAQILRWFQNKRFKIKKS	ERQILIWFKNKRFKIKKS	EAQIIDWFRNKRYKIKKS	ERQIVDWFRNKRFKIKKS	ERQIRKWFDNKRVKIKKS	ENQIRLWFVNKRMKIKKS	EPQIAKWFENKRRKIKKS	ERQIAKWFSNKREKIKKS	EVQIIKWFQNKRWKIKKS	ERQISKWFRNKRSKIKKS	ENQIARWFENKRYKIKKS	EKQIAKWFANKRFKIKKS	ERQIIVWFRNKRAKIKKS	ESQIRVWFSNKRAKIKKS
>83.367.AAA	>83.171.AAC	>83.416.AAG	>83.393.AAT	>83.393.ACA	>83.462.ACC	>83.360.ACG	>83.455.ACT	>83.361.AGA	>83.445.AGC	>83.412.AGG	>83.396.AGT	>83.357.ATA	>83.271.ATC	>83.428.ATG	>83.247.ATT	>83.141.CAA	>83.102.CAC	>83.687.CAG	>83.150.CAT	>83.306.CCA	>83.561.CCC	>83.547.CCG	>83.361.CCT	>83.542.CGA	>83.525.CGC	>83.307.CGG	>83.685.CGT	>83.449.CTA	>83.179.CTC	>83.57.CTG	>83.252.CTT	>83.111.GAA	>83.27.GAC	>83.161.GAG	>83.41.GAT	>83.77.GCA	>83.43.GCC	>83.51.GCG	>83.43.GCT	>83.187.GGA	>83.85.GGC	>83.283.GGG	>83.133.GGT	>83.78.GTA	>83.86.GTC	>83.149.GTG	>83.158.GTT	>83.228.TAA	>83.134.TAC
EMQIYYWFVNKRHKIKKS	EVQIASWFRNKRFKIKKS	EHQIKQWFWNKRFKIKKS	EVQINSWFANKRHKIKKS	EKQITCWFHNKRQKIKKS	EKQILNWFHNKRTKIKKS	ENQIRRWFENKRRKIKKS	EKQIRYWFHNKRTKIKKS	EAQIFRWFANKRTKIKKS	ESQIEAWFRNKRTKIKKS	EMQISKWFENKRYKIKKS	EWQINKWFENKRYKIKKS	ERQIMAWFSNKRFKIKKS	ELQIRRWFRNKRLKIKKS	ERQIMFWFQNKRCKIKKS	EKQIRIWFQNKRAKIKKS	ELQITYWFQNKRRKIKKS	EAQIMMWFRNKRRKIKKS	EMQISWWFWNKRRKIKKS	EHQIANWFSNKRRKIKKS	ERQIADWFANKRKKIKKS	ETQIANWFGNKRKKIKKS	ERQIRDWFDNKRKKIKKS	ETQIQNWFGNKRKKIKKS	EEQIMLWFSNKR_KIKKS	ESQITNWFSNKRRKIKKS	ESQIRGWFRNKRLKIKKS	ERQILNWFSNKRRKIKKS	ERQISYWFGNKRKKIKKS	ERQIMMWFSNKRKKIKKS	EKQITLWFQNKRKKIKKS	EVQIMMWFANKRKKIKKS	EAQILRWFQNKRWKIKKS	ETQIRRWFRNKRWKIKKS	EQQISRWFWNKRYKIKKS	EVQIMHWFRNKRWKIKKS	EPQIMRWFQNKRHKIKKS	ERQIVAWFKNKRYKIKKS	ETQIADWFRNKRYKIKKS	EFQIMDWFRNKRYKIKKS	ETQILKWFDNKRFKIKKS	EVQILKWFNNKRAKIKKS	EKQIMKWFENKRRKIKKS	EGQIAKWFDNKRYKIKKS	ETQISKWFQNKRNKIKKS	EAQIGKWFRNKRSKIKKS	EVQISRWFENKRYKIKKS	EKQIRRWFGNKRFKIKKS	ERQILLWFRNKRAKIKKS	EEQIRVWFSNKRSKIKKS
>84.366.AAA	>84.170.AAC	>84.414.AAG	>84.391.AAT	>84.389.ACA	>84.461.ACC	>84.354.ACG	>84.450.ACT	>84.360.AGA	>84.435.AGC	>84.409.AGG	>84.393.AGT	>84.354.ATA	>84.260.ATC	>84.428.ATG	>84.244.ATT	>84.140.CAA	>84.102.CAC	>84.682.CAG	>84.150.CAT	>84.303.CCA	>84.559.CCC	>84.515.CCG	>84.360.CCT	>84.542.CGA	>84.523.CGC	>84.304.CGG	>84.664.CGT	>84.446.CTA	>84.172.CTC	>84.56.CTG	>84.246.CTT	>84.110.GAA	>84.27.GAC	>84.156.GAG	>84.41.GAT	>84.76.GCA	>84.42.GCC	>84.51.GCG	>84.43.GCT	>84.179.GGA	>84.85.GGC	>84.281.GGG	>84.133.GGT	>84.78.GTA	>84.85.GTC	>84.146.GTG	>84.157.GTT	>84.227.TAA	>84.131.TAC
ELQINSWFANKRHKIKKS	ETQIISWFRNKRHKIKKS	EKQINQWFWNKRHKIKKS	ERQINMWFTNKRFKIKKS	EMQILNWFNNKRRKIKKS	ESQISSWFSNKRKKIKKS	ERQIGYWFDNKRRKIKKS	EQQIRSWFSNKRWKIKKS	ERQIFRWFANKRAKIKKS	EWQIYRWFKNKRYKIKKS	EEQIMKWFENKRYKIKKS	ERQIRKWFENKRHKIKKS	ERQILYWFQNKRWKIKKS	ETQIRMWFANKRYKIKKS	ERQIMVWFQNKRTKIKKS	EVQIRTWFQNKRSKIKKS	ETQILYWFQNKRRKIKKS	ELQIAYWFSNKRRKIKKS	EKQIAYWFWNKRRKIKKS	EGQISNWFTNKRRKIKKS	EVQISNWFANKRKKIKKS	EVQIAYWFSNKRKKIKKS	ERQIADWFQNKRKKIKKS	EIQISNWFNNKRKKIKKS	ELQIHNWFANKRRKIKKS	ERQILMWFSNKRRKIKKS	EIQIVHWFENKRRKIKKS	EKQIADWFSNKRRKIKKS	ELQILYWFSNKRKKIKKS	ERQIYNWFSNKRKKIKKS	EVQIVYWFENKRKKIKKS	EEQIVYWFGNKRRKIKKS	EGQISRWFQNKRWKIKKS	ETQIVRWFRNKRWKIKKS	ERQIQVWFWNKRYKIKKS	EKQITQWFRNKRYKIKKS	EHQIAKWFQNKRRKIKKS	ELQIKIWFKNKRYKIKKS	ERQISDWFRNKRRKIKKS	ESQILDWFRNKRYKIKKS	EVQIGKWFDNKRQKIKKS	EGQISKWFNNKRLKIKKS	EAQILKWFENKRQKIKKS	ERQIAKWFNNKRIKIKKS	EMQIRRWFDNKRSKIKKS	ENQIRRWFGNKRFKIKKS	EVQINKWFENKRCKIKKS	ERQIVTWFANKRYKIKKS	ERQIIVWFSNKRAKIKKS	EHQIRVWFSNKRAKIKKS
>85.364.AAA	>85.170.AAC	>85.411.AAG	>85.391.AAT	>85.387.ACA	>85.458.ACC	>85.347.ACG	>85.447.ACT	>85.360.AGA	>85.434.AGC	>85.409.AGG	>85.391.AGT	>85.351.ATA	>85.259.ATC	>85.419.ATG	>85.244.ATT	>85.139.CAA	>85.101.CAC	>85.676.CAG	>85.149.CAT	>85.302.CCA	>85.558.CCC	>85.514.CCG	>85.353.CCT	>85.540.CGA	>85.521.CGC	>85.292.CGG	>85.659.CGT	>85.446.CTA	>85.172.CTC	>85.54.CTG	>85.244.CTT	>85.109.GAA	>85.27.GAC	>85.151.GAG	>85.41.GAT	>85.76.GCA	>85.40.GCC	>85.51.GCG	>85.42.GCT	>85.178.GGA	>85.84.GGC	>85.279.GGG	>85.133.GGT	>85.78.GTA	>85.85.GTC	>85.143.GTG	>85.156.GTT	>85.217.TAA	>85.129.TAC
ERQIMSWFANKRHKIKKS	EMQIAAWFRNKRFKIKKS	ERQINQWFWNKRFKIKKS	ERQINVWFTNKRFKIKKS	EGQIYWWFCNKRRKIKKS	EVQIGYWFHNKRQKIKKS	ERQIRYWFDNKRRKIKKS	EKQICDWFHNKRTKIKKS	ETQIRRWFENKRWKIKKS	EGQIVRWFNNKRVKIKKS	EQQIDKWFENKRYKIKKS	ERQIKKWFENKRSKIKKS	EVQIIYWFQNKRWKIKKS	ETQIRMWFANKRWKIKKS	EKQILYWFQNKRNKIKKS	EKQIKIWFQNKRNKIKKS	EIQIMTWFQNKRRKIKKS	ELQIAMWFRNKRRKIKKS	EVQIRFWFGNKRCKIKKS	EKQIGNWFSNKRRKIKKS	EQQIHNWFANKRKKIKKS	EVQIRDWFSNKRKKIKKS	EKQIATWFENKRKKIKKS	ERQILDWFGNKRKKIKKS	ERQIQYWFGNKRAKIKKS	ERQIHYWFNNKRRKIKKS	EKQITHWFENKRRKIKKS	ESQIANWFSNKRRKIKKS	EAQIGFWFANKRKKIKKS	EKQIMYWFGNKRKKIKKS	ECQITNWFQNKRRKIKKS	ERQINHWFGNKRRKIKKS	EAQIQRWFQNKRWKIKKS	EGQIERWFRNKRFKIKKS	ERQIQRWFWNKRWKIKKS	ERQIEKWFVNKRYKIKKS	EAQICRWFQNKRHKIKKS	EQQIWRWFKNKRYKIKKS	EMQITDWFRNKRFKIKKS	ERQITIWFKNKRWKIKKS	ERQIGKWFDNKRAKIKKS	EPQIWRWFPNKRGKIKKS	EAQISKWFENKRRKIKKS	EKQIMKWFDNKRFKIKKS	EAQIIRWFQNKRWKIKKS	EAQIAKWFRNKRQKIKKS	EVQIHWWFLNKRQKIKKS	ERQIKSWFSNKRYKIKKS	ERQIMVWFANKRSKIKKS	EEQIRVWFSNKRAKIKKS
>86.361.AAA	>86.169.AAC	>86.411.AAG	>86.379.AAT	>86.386.ACA	>86.456.ACC	>86.343.ACG	>86.423.ACT	>86.353.AGA	>86.434.AGC	>86.406.AGG	>86.390.AGT	>86.350.ATA	>86.257.ATC	>86.416.ATG	>86.243.ATT	>86.139.CAA	>86.101.CAC	>86.658.CAG	>86.149.CAT	>86.295.CCA	>86.557.CCC	>86.513.CCG	>86.352.CCT	>86.532.CGA	>86.519.CGC	>86.279.CGG	>86.653.CGT	>86.443.CTA	>86.169.CTC	>86.51.CTG	>86.241.CTT	>86.107.GAA	>86.27.GAC	>86.148.GAG	>86.40.GAT	>86.70.GCA	>86.39.GCC	>86.51.GCG	>86.42.GCT	>86.178.GGA	>86.76.GGC	>86.269.GGG	>86.132.GGT	>86.77.GTA	>86.85.GTC	>86.142.GTG	>86.156.GTT	>86.216.TAA	>86.129.TAC
EKQISMWFSNKRHKIKKS	ERQINSWFRNKRFKIKKS	ELQISQWFWNKRFKIKKS	EDQIDRWFVNKRWKIKKS	EWQIVRWFKNKRFKIKKS	EKQIACWFHNKRVKIKKS	EMQISPWFVNKRDKIKKS	EGQIAHWFVNKRKKIKKS	EEQIFRWFANKRYKIKKS	ETQIRLWFRNKRVKIKKS	ENQIWRWFLNKRMKIKKS	EKQIKKWFENKRLKIKKS	ERQITSWFRNKRAKIKKS	EVQIRMWFANKRWKIKKS	EKQIIYWFQNKRAKIKKS	ETQIFLWFYNKRVKIKKS	ESQIHYWFVNKRRKIKKS	ELQIAYWFSNKRRKIKKS	EVQIELWFYNKRWKIKKS	ELQITHWFSNKRRKIKKS	ENQIHNWFSNKRKKIKKS	EVQISNWFSNKRKKIKKS	EQQILDWFANKRKKIKKS	ERQIVDWFHNKRRKIKKS	ERQIHNWFSNKRRKIKKS	EAQIRNWFSNKRVKIKKS	EGQISRWFENKRRKIKKS	EIQISYWFSNKRRKIKKS	EIQISMWFSNKRKKIKKS	EVQIRFWFSNKRRKIKKS	EKQITNWFQNKRKKIKKS	EDQIKFWFANKRRKIKKS	ESQIAHWFKNKRWKIKKS	ELQITRWFRNKRWKIKKS	EKQIAVWFWNKRYKIKKS	ETQIQRWFLNKRYKIKKS	EGQIGKWFQNKRHKIKKS	EMQIYTWFKNKRFKIKKS	ESQIGDWFRNKRYKIKKS	EAQIMTWFKNKRWKIKKS	EKQIYKWFDNKRSKIKKS	ERQITKWFNNKRMKIKKS	EQQICKWFENKRAKIKKS	ERQISKWFNNKRVKIKKS	EKQIFTWFRNKRLKIKKS	ESQIMKWFRNKRGKIKKS	EMQIVRWFENKRYKIKKS	EYQISKWFSNKRTKIKKS	ERQITLWFRNKRSKIKKS	EYQISRWFINKRFKIKKS
>87.360.AAA	>87.169.AAC	>87.410.AAG	>87.369.AAT	>87.377.ACA	>87.454.ACC	>87.338.ACG	>87.419.ACT	>87.350.AGA	>87.430.AGC	>87.404.AGG	>87.390.AGT	>87.341.ATA	>87.248.ATC	>87.413.ATG	>87.231.ATT	>87.138.CAA	>87.99.CAC	>87.656.CAG	>87.148.CAT	>87.294.CCA	>87.556.CCC	>87.505.CCG	>87.336.CCT	>87.531.CGA	>87.507.CGC	>87.276.CGG	>87.632.CGT	>87.442.CTA	>87.165.CTC	>87.49.CTG	>87.239.CTT	>87.105.GAA	>87.27.GAC	>87.148.GAG	>87.40.GAT	>87.69.GCA	>87.38.GCC	>87.50.GCG	>87.42.GCT	>87.177.GGA	>87.75.GGC	>87.268.GGG	>87.131.GGT	>87.77.GTA	>87.84.GTC	>87.139.GTG	>87.154.GTT	>87.215.TAA	>87.128.TAC
ELQIMMWFINKRGKIKKS	ERQIMSWFRNKRFKIKKS	EQQIKQWFWNKRWKIKKS	ERQILCWFSNKRFKIKKS	EKQILSWFHNKRTKIKKS	ERQISSWFHNKRVKIKKS	EKQIITWFQNKRSKIKKS	ESQIKGWFRNKRSKIKKS	EGQIFRWFANKRWKIKKS	ETQILRWFNNKRVKIKKS	EKQINKWFENKRRKIKKS	ERQIKKWFENKRWKIKKS	EHQITVWFNNKRAKIKKS	EAQIVVWFDNKRGKIKKS	ERQIVYWFQNKRVKIKKS	ERQIHVWFQNKRAKIKKS	ESQIHNWFVNKRRKIKKS	ELQIGMWFRNKRRKIKKS	EIQISHWFWNKRRKIKKS	ETQIASWFSNKRRKIKKS	ERQIVNWFQNKRKKIKKS	ELQINNWFSNKRKKIKKS	ERQIIYWFENKRRKIKKS	EKQILNWFANKRKKIKKS	EPQISYWFANKRAKIKKS	ERQITCWFNNKRRKIKKS	EKQIMYWFENKRRKIKKS	EKQIQNWFSNKRRKIKKS	ERQISNWFANKRKKIKKS	EIQIQYWFGNKRKKIKKS	ERQIMYWFENKRRKIKKS	EMQISYWFSNKRRKIKKS	EHQIERWFQNKRFKIKKS	EGQINRWFRNKRWKIKKS	EVQISRWFWNKRYKIKKS	EVQICRWFLNKRYKIKKS	EQQILRWFQNKRAKIKKS	ERQIWCWFKNKRYKIKKS	ENQITDWFRNKRFKIKKS	ERQISDWFRNKRAKIKKS	ERQISKWFDNKRVKIKKS	EVQIIKWFNNKRFKIKKS	EKQILKWFENKRSKIKKS	ERQISKWFNNKRWKIKKS	ELQIARWFQNKRVKIKKS	ELQIGKWFRNKRAKIKKS	EKQINSWFQNKRWKIKKS	EYQIIRWFANKRYKIKKS	ESQIRIWFANKRAKIKKS	ENQIRVWFSNKRAKIKKS
>88.356.AAA	>88.166.AAC	>88.407.AAG	>88.368.AAT	>88.376.ACA	>88.450.ACC	>88.338.ACG	>88.419.ACT	>88.350.AGA	>88.426.AGC	>88.399.AGG	>88.390.AGT	>88.341.ATA	>88.247.ATC	>88.412.ATG	>88.230.ATT	>88.138.CAA	>88.99.CAC	>88.650.CAG	>88.147.CAT	>88.292.CCA	>88.549.CCC	>88.505.CCG	>88.332.CCT	>88.529.CGA	>88.503.CGC	>88.270.CGG	>88.631.CGT	>88.436.CTA	>88.158.CTC	>88.47.CTG	>88.237.CTT	>88.105.GAA	>88.27.GAC	>88.148.GAG	>88.40.GAT	>88.68.GCA	>88.37.GCC	>88.49.GCG	>88.42.GCT	>88.165.GGA	>88.75.GGC	>88.264.GGG	>88.131.GGT	>88.77.GTA	>88.84.GTC	>88.139.GTG	>88.152.GTT	>88.213.TAA	>88.127.TAC
ERQIYYWFVNKRGKIKKS	ESQITSWFRNKRFKIKKS	ERQIVQWFWNKRYKIKKS	EKQICMWFSNKRFKIKKS	ESQIMNWFNNKRRKIKKS	ESQISAWFHNKRTKIKKS	ERQILRWFENKRRKIKKS	EVQIKYWFENKRKKIKKS	EKQINTWFINKRYKIKKS	EIQIIRWFSNKRVKIKKS	EDQIWAWFQNKR_KIKKS	ELQIAKWFENKRYKIKKS	EHQISRWFANKRTKIKKS	EVQIPGWFSNKRLKIKKS	ERQISSWFQNKRTKIKKS	EMQIKVWFQNKRSKIKKS	ELQIMYWFQNKRRKIKKS	EHQIMQWFSNKRRKIKKS	EMQISWWFWNKRRKIKKS	ESQISNWFGNKRRKIKKS	ERQITDWFSNKRKKIKKS	EMQIVNWFSNKRKKIKKS	EVQITDWFQNKRKKIKKS	ENQILNWFSNKRKKIKKS	ELQISYWFANKRSKIKKS	EGQIRDWFSNKRRKIKKS	ERQIAMWFENKRRKIKKS	EKQIMYWFNNKRRKIKKS	EVQISYWFSNKRKKIKKS	EVQIIYWFGNKRKKIKKS	ERQIMYWFWNKRKKIKKS	ELQIVWWFGNKRQKIKKS	ERQIARWFQNKRWKIKKS	EEQICRWFRNKRWKIKKS	ELQIARWFWNKRWKIKKS	EAQIERWFSNKRYKIKKS	EKQILKWFQNKRVKIKKS	EKQILCWFKNKRFKIKKS	ERQITDWFRNKRWKIKKS	EEQILNWFRNKRFKIKKS	ENQIAKWFDNKRQKIKKS	EFQICKWFSNKRVKIKKS	EGQISKWFENKRRKIKKS	ERQITKWFDNKRWKIKKS	ERQITRWFQNKRVKIKKS	ECQIAKWFRNKRFKIKKS	ECQIQKWFENKRWKIKKS	ETQIGKWFANKRFKIKKS	EKQIITWFSNKRAKIKKS	ETQIRLWFSNKRAKIKKS
>89.355.AAA	>89.166.AAC	>89.402.AAG	>89.367.AAT	>89.375.ACA	>89.446.ACC	>89.336.ACG	>89.418.ACT	>89.348.AGA	>89.423.AGC	>89.398.AGG	>89.388.AGT	>89.337.ATA	>89.247.ATC	>89.410.ATG	>89.229.ATT	>89.137.CAA	>89.99.CAC	>89.650.CAG	>89.146.CAT	>89.288.CCA	>89.548.CCC	>89.503.CCG	>89.329.CCT	>89.526.CGA	>89.501.CGC	>89.268.CGG	>89.631.CGT	>89.432.CTA	>89.154.CTC	>89.47.CTG	>89.236.CTT	>89.103.GAA	>89.27.GAC	>89.146.GAG	>89.40.GAT	>89.67.GCA	>89.36.GCC	>89.48.GCG	>89.42.GCT	>89.158.GGA	>89.74.GGC	>89.263.GGG	>89.130.GGT	>89.77.GTA	>89.83.GTC	>89.138.GTG	>89.150.GTT	>89.209.TAA	>89.126.TAC
ERQIVYWFVNKRHKIKKS	EKQIESWFRNKRFKIKKS	ERQIAQWFWNKRCKIKKS	EQQIMSWFANKRFKIKKS	ELQIQNWFHNKRTKIKKS	EQQIKNWFWNKRKKIKKS	EVQITCWFQNKRNKIKKS	EKQITSWFHNKRMKIKKS	EKQIFRWFANKRWKIKKS	ERQIHYWFRNKRVKIKKS	ERQINKWFENKRWKIKKS	ERQITKWFENKRFKIKKS	EHQITYWFQNKRHKIKKS	EVQIRMWFANKRFKIKKS	EPQIGSWFWNKRCKIKKS	EKQIRVWFQNKRSKIKKS	ELQIHNWFVNKRRKIKKS	EQQISMWFRNKRRKIKKS	ERQISCWFWNKRRKIKKS	ESQIANWFANKRRKIKKS	ERQILDWFANKRKKIKKS	ELQIQNWFSNKRKKIKKS	ETQIINWFQNKRKKIKKS	EKQILNWFHNKRRKIKKS	EAQIGWWFGNKRQKIKKS	EQQIGYWFSNKRRKIKKS	ESQITRWFENKRRKIKKS	EVQIYYWFNNKRRKIKKS	ESQIRYWFSNKRAKIKKS	EKQICYWFSNKRKKIKKS	ETQITNWFQNKRRKIKKS	ERQICNWFGNKRKKIKKS	EWQIQRWFQNKRWKIKKS	EMQIQRWFRNKRWKIKKS	EKQISRWFWNKRWKIKKS	EEQIGRWFLNKRYKIKKS	EVQIYHWFRNKRAKIKKS	EGQITRWFKNKRFKIKKS	ELQISDWFRNKRYKIKKS	EQQIMDWFRNKRFKIKKS	EKQIEKWFDNKRQKIKKS	EKQISKWFNNKRVKIKKS	ERQILKWFENKRRKIKKS	EKQIVKWFDNKRVKIKKS	EVQILRWFQNKRSKIKKS	ERQILRWFGNKRAKIKKS	ERQITGWFQNKRYKIKKS	EEQIGRWFANKRFKIKKS	EKQIVTWFVNKRAKIKKS	EVQIRIWFSNKRAKIKKS
>90.354.AAA	>90.163.AAC	>90.400.AAG	>90.366.AAT	>90.375.ACA	>90.443.ACC	>90.333.ACG	>90.414.ACT	>90.337.AGA	>90.422.AGC	>90.394.AGG	>90.388.AGT	>90.337.ATA	>90.246.ATC	>90.400.ATG	>90.229.ATT	>90.136.CAA	>90.98.CAC	>90.649.CAG	>90.146.CAT	>90.287.CCA	>90.540.CCC	>90.502.CCG	>90.327.CCT	>90.525.CGA	>90.494.CGC	>90.266.CGG	>90.629.CGT	>90.427.CTA	>90.148.CTC	>90.45.CTG	>90.236.CTT	>90.103.GAA	>90.27.GAC	>90.144.GAG	>90.40.GAT	>90.67.GCA	>90.36.GCC	>90.48.GCG	>90.42.GCT	>90.153.GGA	>90.73.GGC	>90.258.GGG	>90.130.GGT	>90.77.GTA	>90.81.GTC	>90.136.GTG	>90.149.GTT	>90.203.TAA	>90.126.TAC
EKQIDTWFANKRFKIKKS	EAQISSWFRNKRHKIKKS	EKQIAQWFWNKRHKIKKS	ERQILTWFSNKRHKIKKS	EMQIRTWFQNKRRKIKKS	EVQIVFWFYNKRLKIKKS	EKQIYYWFDNKRRKIKKS	EVQIAAWFQNKR_KIKKS	EYQIQMWFMNKRCKIKKS	ESQIMRWFNNKRVKIKKS	EKQIMKWFENKRRKIKKS	ERQISKWFENKRFKIKKS	ERQILCWFANKRSKIKKS	EIQIGFWFDNKRIKIKKS	ERQILVWFQNKRCKIKKS	EVQIKVWFMNKRSKIKKS	EDQIHNWFANKRRKIKKS	EEQIRQWFSNKRRKIKKS	ELQIVLWFLNKRLKIKKS	EKQIGCWFSNKRRKIKKS	ERQIITWFQNKRKKIKKS	EVQIVTWFSNKRKKIKKS	EVQIVYWFENKRRKIKKS	ESQIANWFSNKRKKIKKS	ERQICMWFANKRAKIKKS	ERQIRDWFSNKRVKIKKS	ERQITHWFENKRRKIKKS	ERQIKMWFNNKRRKIKKS	EMQITYWFSNKRKKIKKS	ENQIRFWFGNKRKKIKKS	ELQIRQWFPNKRIKIKKS	ERQIIDWFSNKRRKIKKS	EKQIERWFQNKRFKIKKS	EAQITRWFRNKRFKIKKS	EFQIARWFWNKRYKIKKS	EMQITVWFRNKRYKIKKS	EAQITRWFQNKRCKIKKS	EGQIYRWFKNKRYKIKKS	EQQIMDWFRNKRYKIKKS	EQQIADWFRNKRFKIKKS	EVQICKWFDNKRQKIKKS	EKQILKWFNNKRMKIKKS	ERQINKWFENKRMKIKKS	EKQIAKWFDNKRVKIKKS	ELQISRWFQNKRLKIKKS	ENQIRRWFGNKRAKIKKS	ERQIAKWFENKRCKIKKS	EEQIYRWFGNKRYKIKKS	ERQIGIWFANKRSKIKKS	ENQIRVWFSNKRAKIKKS
>91.351.AAA	>91.163.AAC	>91.397.AAG	>91.360.AAT	>91.372.ACA	>91.427.ACC	>91.328.ACG	>91.409.ACT	>91.336.AGA	>91.421.AGC	>91.388.AGG	>91.388.AGT	>91.337.ATA	>91.234.ATC	>91.391.ATG	>91.228.ATT	>91.135.CAA	>91.98.CAC	>91.640.CAG	>91.145.CAT	>91.286.CCA	>91.538.CCC	>91.499.CCG	>91.321.CCT	>91.507.CGA	>91.494.CGC	>91.260.CGG	>91.629.CGT	>91.424.CTA	>91.147.CTC	>91.45.CTG	>91.234.CTT	>91.101.GAA	>91.26.GAC	>91.141.GAG	>91.39.GAT	>91.64.GCA	>91.36.GCC	>91.48.GCG	>91.42.GCT	>91.152.GGA	>91.73.GGC	>91.253.GGG	>91.130.GGT	>91.77.GTA	>91.80.GTC	>91.135.GTG	>91.147.GTT	>91.198.TAA	>91.126.TAC
EKQIAGWFSNKRHKIKKS	EGQISAWFRNKRFKIKKS	ERQIVQWFWNKRFKIKKS	ESQIVSWFSNKRHKIKKS	EKQISSWFCNKRNKIKKS	ELQIMLWFMNKRLKIKKS	ERQIMAWFQNKRNKIKKS	ELQIYPWFVNKRNKIKKS	ERQIIYWFNNKRTKIKKS	EQQISRWFNNKRVKIKKS	ERQIQQWFTNKRNKIKKS	ERQISKWFQNKRFKIKKS	ESQIRWWFNNKRSKIKKS	RGPDPALVPEQAGQDQEV	EAQIKYWFQNKRSKIKKS	ELQIVRWFDNKRYKIKKS	ELQIAYWFSNKRRKIKKS	ESQISQWFRNKRRKIKKS	ERQISHWFWNKRRKIKKS	ELQIAWWFSNKRRKIKKS	ETQIMYWFQNKRKKIKKS	ERQIQNWFSNKRKKIKKS	EKQIMDWFQNKRKKIKKS	ERQISNWFSNKRKKIKKS	ERQIFYWFANKRSKIKKS	EQQITNWFSNKRRKIKKS	ERQIVYWFENKRRKIKKS	EIQIQNWFSNKRRKIKKS	EQQIAHWFSNKRKKIKKS	EKQIKFWFSNKRKKIKKS	EKQIQMWFENKRKKIKKS	EKQIGYWFGNKRSKIKKS	EMQINRWFQNKRWKIKKS	EGQIGRWFRNKRWKIKKS	ELQIATWFWNKRYKIKKS	EPQIAMWFRNKRWKIKKS	EGQILKWFQNKRMKIKKS	EGQIYMWFKNKRYKIKKS	EFQIVDWFRNKRYKIKKS	EPQIMDWFRNKRYKIKKS	ENQISKWFDNKRWKIKKS	EHQIGKWFNNKRQKIKKS	ERQITKWFENKRRKIKKS	EFQIQKWFSNKRCKIKKS	EVQISRWFQNKRGKIKKS	EQQIGKWFRNKRFKIKKS	EMQITRWFENKRYKIKKS	EGQIARWFANKRFKIKKS	ERQIVVWFNNKRSKIKKS	ETQIRIWFSNKRAKIKKS
>92.350.AAA	>92.161.AAC	>92.397.AAG	>92.352.AAT	>92.371.ACA	>92.425.ACC	>92.323.ACG	>92.408.ACT	>92.334.AGA	>92.420.AGC	>92.384.AGG	>92.385.AGT	>92.336.ATA	>92.222.ATC	>92.380.ATG	>92.227.ATT	>92.134.CAA	>92.98.CAC	>92.626.CAG	>92.145.CAT	>92.285.CCA	>92.525.CCC	>92.493.CCG	>92.320.CCT	>92.504.CGA	>92.489.CGC	>92.259.CGG	>92.629.CGT	>92.424.CTA	>92.147.CTC	>92.44.CTG	>92.230.CTT	>92.100.GAA	>92.26.GAC	>92.140.GAG	>92.39.GAT	>92.64.GCA	>92.36.GCC	>92.48.GCG	>92.42.GCT	>92.152.GGA	>92.73.GGC	>92.252.GGG	>92.130.GGT	>92.77.GTA	>92.80.GTC	>92.135.GTG	>92.145.GTT	>92.196.TAA	>92.125.TAC
EKQISQWFSNKRHKIKKS	EKQIGAWFRNKRFKIKKS	EQQIKQWFWNKRFKIKKS	EAQIKAWFSNKRFKIKKS	EKQIVCWFHNKRSKIKKS	ESQIANWFANKRKKIKKS	ERQIKYWFENKRRKIKKS	ERQIWWWFSNKRKKIKKS	EHQIRAWFKNKRYKIKKS	ERQIRMWFSNKRTKIKKS	ERQIYKWFENKRYKIKKS	ESQIRKWFENKRFKIKKS	EGQIRNWFQNKRPKIKKS	RGPDPHVVQQQAAQDQES	EGQILLWFRNKRPKIKKS	EEQIRVWFQNKRRKIKKS	ERQILDWFSNKRRKIKKS	ELQICMWFRNKRRKIKKS	ECQIHSWFWNKR_KIKKS	ERQIGDWFSNKRRKIKKS	ESQISNWFSNKRKKIKKS	ERQITDWFSNKRKKIKKS	ERQILNWFQNKRKKIKKS	ESQIVNWFSNKRKKIKKS	ERQIFHWFANKRAKIKKS	EVQIRNWFSNKRVKIKKS	EVQICRWFENKRRKIKKS	ENQIVNWFSNKRRKIKKS	EVQITYWFANKRKKIKKS	ETQIRMWFANKRKKIKKS	EKQIQYLFENKRRKIKKS	EQQIVYWFGNKRAKIKKS	EQQIQRWFQNKRWKIKKS	EGQIQRWFRNKRFKIKKS	EKQIMRWFWNKRWKIKKS	EQQIMSWFRNKRWKIKKS	EGQIGRWFQNKRFKIKKS	ENQIRAWFKNKRWKIKKS	ELQICDWFRNKRYKIKKS	EVQISTWFKNKRYKIKKS	EWQIAKWFDNKRWKIKKS	EGQILKWFSNKREKIKKS	ESQIAKWFENKRRKIKKS	EQQIVKWFSNKRMKIKKS	EVQILRWFQNKRVKIKKS	EVQIMKWFRNKRFKIKKS	EAQIARWFENKRYKIKKS	EEQIMRWFGNKRFKIKKS	ERQIGTWFVNKRAKIKKS	EAQIRIWFSNKRAKIKKS
>93.346.AAA	>93.160.AAC	>93.395.AAG	>93.351.AAT	>93.368.ACA	>93.421.ACC	>93.321.ACG	>93.394.ACT	>93.331.AGA	>93.417.AGC	>93.380.AGG	>93.382.AGT	>93.333.ATA	>93.220.ATC	>93.376.ATG	>93.225.ATT	>93.134.CAA	>93.98.CAC	>93.626.CAG	>93.145.CAT	>93.285.CCA	>93.521.CCC	>93.481.CCG	>93.312.CCT	>93.502.CGA	>93.487.CGC	>93.254.CGG	>93.621.CGT	>93.424.CTA	>93.144.CTC	>93.43.CTG	>93.230.CTT	>93.99.GAA	>93.26.GAC	>93.138.GAG	>93.39.GAT	>93.64.GCA	>93.35.GCC	>93.48.GCG	>93.42.GCT	>93.152.GGA	>93.70.GGC	>93.248.GGG	>93.129.GGT	>93.75.GTA	>93.79.GTC	>93.131.GTG	>93.144.GTT	>93.194.TAA	>93.125.TAC
ERQIYTWFANKRHKIKKS	EMQIMQWFRNKRFKIKKS	EKQIAQWFWNKRFKIKKS	ERQITAWFSNKRHKIKKS	EVQISNWFNNKRRKIKKS	ESQILSWFHNKRMKIKKS	EAQIKNWFENKRRKIKKS	EVQISTWFHNKRMKIKKS	ELQIFRWFANKRAKIKKS	EKQISRWFNNKRVKIKKS	ERQIMKWFENKRYKIKKS	ERQIKKWFENKRCKIKKS	EFQIRWWFNNKRQKIKKS	EMQILQWFRNKRYKIKKS	EYQISSWFTNKRLKIKKS	ERQISVWFSNKRSKIKKS	EVQIGNWFANKRRKIKKS	EMQIHHWFSNKRRKIKKS	ELQISRWFWNKRRKIKKS	ELQIAYWFSNKRRKIKKS	EKQITQWFANKRKKIKKS	EKQIMMWFSNKRKKIKKS	ETQIVNWFGNKRKKIKKS	EKQIMNWFANKRKKIKKS	ERQIIYWFANKRMKIKKS	ERQIHYWFSNKRVKIKKS	ERQIIRWFENKRRKIKKS	EGQIMNWFSNKRRKIKKS	EVQIFYWFANKRRKIKKS	ELQIGNWFRNKRKKIKKS	ESQIGVWFRNKRLKIKKS	ERQISNWFSNKRRKIKKS	ENQISRWFQNKRWKIKKS	EVQIVRWFRNKRWKIKKS	EVQITRWFWNKRYKIKKS	ELQINIWFRNKRYKIKKS	EVQIMKWFQNKRFKIKKS	ESQIVMWFKNKRYKIKKS	ENQIGVWFCNKRGKIKKS	EMQIRYWFKNKRYKIKKS	ERQIFRWFANKRWKIKKS	EKQISKWFNNKRLKIKKS	EVQILKWFENKRFKIKKS	EVQISKWFNNKRGKIKKS	EYQIMRWFANKRQKIKKS	EVQISRWFGNKRFKIKKS	EYQILKWFENKRFKIKKS	ESQISRWFGNKRFKIKKS	ERQISVWFCNKRAKIKKS	ESQIRIWFSNKRAKIKKS
>94.345.AAA	>94.160.AAC	>94.394.AAG	>94.350.AAT	>94.367.ACA	>94.415.ACC	>94.321.ACG	>94.391.ACT	>94.329.AGA	>94.414.AGC	>94.377.AGG	>94.374.AGT	>94.329.ATA	>94.220.ATC	>94.372.ATG	>94.225.ATT	>94.134.CAA	>94.98.CAC	>94.626.CAG	>94.145.CAT	>94.280.CCA	>94.520.CCC	>94.479.CCG	>94.310.CCT	>94.495.CGA	>94.479.CGC	>94.228.CGG	>94.618.CGT	>94.423.CTA	>94.141.CTC	>94.42.CTG	>94.230.CTT	>94.99.GAA	>94.26.GAC	>94.137.GAG	>94.38.GAT	>94.63.GCA	>94.34.GCC	>94.48.GCG	>94.41.GCT	>94.152.GGA	>94.70.GGC	>94.248.GGG	>94.129.GGT	>94.75.GTA	>94.78.GTC	>94.130.GTG	>94.141.GTT	>94.187.TAA	>94.124.TAC
ELQIAYWFVNKRHKIKKS	ERQICSWFRNKRHKIKKS	EPQIQQWFHNKRQKIKKS	EKQIMSWFSNKRHKIKKS	EKQIVTWFHNKRSKIKKS	EYQIAGWFKNKRAKIKKS	ERQIKHWFENKRRKIKKS	EKQISNWFHNKRTKIKKS	EAQIRDWFQNKRYKIKKS	EQQIMRWFNNKRVKIKKS	ETQISKWFENKRFKIKKS	ESQIRKWFENKRFKIKKS	EKQINCWFANKRSKIKKS	ERQIRMWFANKRWKIKKS	EQQIKAWFKNKRYKIKKS	ERQIKVWFQNKRSKIKKS	EVQIYYWFSNKRRKIKKS	EKQIASWFSNKRRKIKKS	ESQISHWFWNKRRKIKKS	ERQIQCWFSNKRRKIKKS	ETQIMNWFANKRKKIKKS	ELQISNWFSNKRKKIKKS	ELQITYWFENKRKKIKKS	ETQIVNWFSNKRKKIKKS	ETQIANWFGNKRAKIKKS	EQQIHDWFSNKRRKIKKS	EKQIVHWFENKRRKIKKS	EGQISNWFSNKRRKIKKS	ENQIAMWFANKRRKIKKS	ELQIRYWFSNKRRKIKKS	ETQIQYWFENKRRKIKKS	ELQISYWFGNKRKKIKKS	EKQIFTWFKNKRYKIKKS	EAQIVRWFRNKRWKIKKS	EMQICRWFWNKRYKIKKS	EGQIQRWFINKRYKIKKS	ERQIAKWFQNKRAKIKKS	ESQILVWFHNKRCKIKKS	EMQIVDWFRNKRYKIKKS	EFQIRVWFKNKRFKIKKS	ELQISKWFSNKREKIKKS	EKQIKKWFNNKRQKIKKS	EKQILKWFENKRAKIKKS	EKQILKWFDNKRSKIKKS	EAQITKWFQNKRGKIKKS	ELQISKWFRNKRYKIKKS	ERQIHSWFQNKRYKIKKS	EAQILRWFANKRFKIKKS	EMQIRVWFANKRAKIKKS	EEQIRVWFSNKRSKIKKS
>95.345.AAA	>95.159.AAC	>95.392.AAG	>95.347.AAT	>95.367.ACA	>95.407.ACC	>95.315.ACG	>95.390.ACT	>95.324.AGA	>95.412.AGC	>95.369.AGG	>95.372.AGT	>95.328.ATA	>95.209.ATC	>95.371.ATG	>95.224.ATT	>95.134.CAA	>95.97.CAC	>95.622.CAG	>95.144.CAT	>95.279.CCA	>95.518.CCC	>95.473.CCG	>95.309.CCT	>95.480.CGA	>95.476.CGC	>95.211.CGG	>95.607.CGT	>95.416.CTA	>95.140.CTC	>95.41.CTG	>95.230.CTT	>95.99.GAA	>95.26.GAC	>95.133.GAG	>95.38.GAT	>95.62.GCA	>95.34.GCC	>95.48.GCG	>95.41.GCT	>95.152.GGA	>95.70.GGC	>95.248.GGG	>95.128.GGT	>95.75.GTA	>95.78.GTC	>95.129.GTG	>95.140.GTT	>95.186.TAA	>95.123.TAC
EKQINTWFANKRFKIKKS	EKQIDSWFRNKRFKIKKS	ELQISQWFWNKRHKIKKS	EKQIFSWFGNKRAKIKKS	EKQISGWFCNKRRKIKKS	ERQILSWFKNKRNKIKKS	ELQILCWFWNKRKKIKKS	EWQIQRWFKNKRFKIKKS	EPQISRWFVNKRWKIKKS	ERQILRWFNNKRVKIKKS	EGQIRKWFENKRYKIKKS	EKQIHKWFENKRWKIKKS	EIQIITWFNNKRAKIKKS	EVQILVWFVNKRFKIKKS	ESQIRSWFQNKRTKIKKS	ERQIHVWFQNKRQKIKKS	EDQIHNWFVNKRRKIKKS	ELQISYWFSNKRRKIKKS	ETQIRNWFQNKRKKIKKS	ESQICDWFANKRRKIKKS	EAQIANWFANKRKKIKKS	ENQIVNWFSNKRKKIKKS	ELQITYWFENKRKKIKKS	EQQIANWFSNKRKKIKKS	ERQISMWFANKRSKIKKS	EKQIDYWFSNKRRKIKKS	EKQIVYWFENKRRKIKKS	EVQIVNWFSNKRRKIKKS	EPQIIMWFANKRRKIKKS	EVQIFNWFRNKRKKIKKS	EKQIRDWFQNKRKKIKKS	ELQIVHWFANKRKKIKKS	EGQILRWFQNKRWKIKKS	EGQIGRWFRNKRWKIKKS	ERQIQQWFWNKRWKIKKS	ELQICVWFRNKRYKIKKS	EKQIVRWFQNKRRKIKKS	EFQIYRWFKNKRYKIKKS	ERQITDWFRNKRCKIKKS	ERQICDWFRNKRFKIKKS	ENQITKWFDNKRQKIKKS	EKQICKWFNNKRLKIKKS	EEQIRKWFENKRRKIKKS	EKQILKWFNNKRQKIKKS	EGQINRWFQNKRTKIKKS	ETQISKWFRNKRFKIKKS	EKQIVKWFENKRCKIKKS	EKQISKWFGNKRFKIKKS	ERQICLWFRNKRSKIKKS	EEQIRVWFSNKRSKIKKS
>96.344.AAA	>96.158.AAC	>96.386.AAG	>96.344.AAT	>96.363.ACA	>96.405.ACC	>96.307.ACG	>96.376.ACT	>96.322.AGA	>96.404.AGC	>96.368.AGG	>96.371.AGT	>96.327.ATA	>96.207.ATC	>96.370.ATG	>96.223.ATT	>96.132.CAA	>96.97.CAC	>96.619.CAG	>96.144.CAT	>96.275.CCA	>96.517.CCC	>96.472.CCG	>96.303.CCT	>96.471.CGA	>96.469.CGC	>96.206.CGG	>96.596.CGT	>96.410.CTA	>96.137.CTC	>96.41.CTG	>96.230.CTT	>96.99.GAA	>96.26.GAC	>96.132.GAG	>96.38.GAT	>96.62.GCA	>96.34.GCC	>96.48.GCG	>96.41.GCT	>96.151.GGA	>96.68.GGC	>96.244.GGG	>96.127.GGT	>96.73.GTA	>96.76.GTC	>96.127.GTG	>96.139.GTT	>96.183.TAA	>96.122.TAC
ERQIAMWFVNKRWKIKKS	EAQIGCWFRNKRFKIKKS	ERQIAQWFWNKRWKIKKS	ERQINTWFVNKRFKIKKS	EKQIKNWFLNKRRKIKKS	ELQIMSWFKNKRLKIKKS	EQQIMIWFDNKRGKIKKS	EMQIGNWFHNKRVKIKKS	ERQIHYWFANKRWKIKKS	EVQICAWFKNKRFKIKKS	EKQIKTWFENKRYKIKKS	EKQIVKWFENKRQKIKKS	ELQIWGWFVNKRLKIKKS	EFQIQAWFKNKRYKIKKS	ERQIKVWFQNKRDKIKKS	EWQIRIWFQNKRAKIKKS	ESQIHYWFANKRRKIKKS	ELQIGQWFRNKRRKIKKS	EKQISCWFWNKRRKIKKS	ERQISDWFSNKRVKIKKS	ELQIMTWFQNKRKKIKKS	EGQILNWFSNKRKKIKKS	ERQILNWFQNKRKKIKKS	ELQIVYWFSNKRKKIKKS	ELQIFNWFANKRRKIKKS	ERQIVYWFSNKRAKIKKS	ERQIARWFENKRRKIKKS	EKQIQLWFNNKRRKIKKS	ELQIFNWFANKRRKIKKS	ETQIRFWFANKRKKIKKS	EKQISFWFWNKRKKIKKS	ESQIVYWFGNKRAKIKKS	ERQIKRWFQNKRWKIKKS	EEQISRWFRNKRHKIKKS	ERQINQWFWNKRWKIKKS	ELQILVWFRNKRYKIKKS	ERQIGKWFQNKRRKIKKS	EEQIRIWFKNKRFKIKKS	ERQIADWFRNKRRKIKKS	ELQITDWFRNKRFKIKKS	ERQIAKWFDNKRAKIKKS	EKQITKWFSNKRGKIKKS	EKQINKWFENKRRKIKKS	ETQILGWFTNKRYKIKKS	EVQIARWFQNKRVKIKKS	EWQIVFWFANKRSKIKKS	EAQIVRWFENKRYKIKKS	EGQIVRWFANKRYKIKKS	EEQIRIWFCNKRAKIKKS	EEQIRVWFSNKRAKIKKS
>97.342.AAA	>97.158.AAC	>97.377.AAG	>97.339.AAT	>97.362.ACA	>97.403.ACC	>97.300.ACG	>97.373.ACT	>97.318.AGA	>97.399.AGC	>97.365.AGG	>97.368.AGT	>97.325.ATA	>97.203.ATC	>97.368.ATG	>97.220.ATT	>97.131.CAA	>97.96.CAC	>97.615.CAG	>97.144.CAT	>97.273.CCA	>97.515.CCC	>97.465.CCG	>97.297.CCT	>97.468.CGA	>97.468.CGC	>97.205.CGG	>97.570.CGT	>97.403.CTA	>97.137.CTC	>97.41.CTG	>97.229.CTT	>97.98.GAA	>97.26.GAC	>97.131.GAG	>97.38.GAT	>97.62.GCA	>97.34.GCC	>97.48.GCG	>97.41.GCT	>97.149.GGA	>97.68.GGC	>97.243.GGG	>97.126.GGT	>97.72.GTA	>97.76.GTC	>97.123.GTG	>97.139.GTT	>97.182.TAA	>97.121.TAC
EKQIVSWFNNKRHKIKKS	ESQICSWFRNKRFKIKKS	EKQIVQWFWNKRYKIKKS	ESQISSWFSNKRFKIKKS	EMQITNWFNNKRRKIKKS	ELQIYYWFLNKRIKIKKS	ELQIRPWFGNKRHKIKKS	EKQITGWFHNKRMKIKKS	ERQIQVWFWNKRYKIKKS	EVQIARWFNNKRVKIKKS	EGQISTWFPNKRKKIKKS	EKQIKKWFMNKRFKIKKS	ERQIQSWFANKRTKIKKS	EDQIMVWFQNKRRKIKKS	EVQITYWFQNKRWKIKKS	ETQIKVWFQNKRSKIKKS	ELQIMYWFQNKRRKIKKS	ETQIGTWFRNKRRKIKKS	ECQIKYWFWNKRRKIKKS	ERQIANWFSNKRRKIKKS	ETQIANWFSNKRKKIKKS	EVQIGNWFSNKRKKIKKS	ESQIMNWFSNKRKKIKKS	ELQIANWFSNKRKKIKKS	EAQIFYWFANKRSKIKKS	ERQILMWFSNKRKKIKKS	EMQITRWFENKRRKIKKS	ESQIANWFSNKRRKIKKS	ESQIAMWFSNKRKKIKKS	EVQIMNWFRNKRKKIKKS	EKQIMFWFWNKRKKIKKS	ETQIAYWFGNKRQKIKKS	EAQIKRWFQNKRWKIKKS	EEQITRWFRNKRWKIKKS	EQQIARWFWNKRYKIKKS	EVQIMVWFRNKRYKIKKS	EKQISRWFQNKRQKIKKS	EAQITSWFKNKRYKIKKS	EGQINDWFRNKRYKIKKS	EPQITNWFRNKRFKIKKS	ECQIAKWFDNKRYKIKKS	EYQIAKWFNNKRFKIKKS	EGQISKWFENKRRKIKKS	ETQITKWFDNKRQKIKKS	EMQIAKWFQNKRGKIKKS	EVQIMRWFGNKRFKIKKS	EFQISTWFQNKRYKIKKS	EVQITRWFGNKRYKIKKS	ERQIATWFVNKRAKIKKS	EEQIRVWFSNKRAKIKKS
>98.342.AAA	>98.156.AAC	>98.373.AAG	>98.336.AAT	>98.358.ACA	>98.399.ACC	>98.289.ACG	>98.370.ACT	>98.316.AGA	>98.394.AGC	>98.364.AGG	>98.364.AGT	>98.323.ATA	>98.195.ATC	>98.364.ATG	>98.216.ATT	>98.131.CAA	>98.96.CAC	>98.609.CAG	>98.142.CAT	>98.267.CCA	>98.513.CCC	>98.450.CCG	>98.292.CCT	>98.467.CGA	>98.467.CGC	>98.202.CGG	>98.556.CGT	>98.399.CTA	>98.125.CTC	>98.41.CTG	>98.229.CTT	>98.98.GAA	>98.26.GAC	>98.130.GAG	>98.38.GAT	>98.62.GCA	>98.34.GCC	>98.47.GCG	>98.41.GCT	>98.144.GGA	>98.67.GGC	>98.240.GGG	>98.126.GGT	>98.72.GTA	>98.74.GTC	>98.119.GTG	>98.139.GTT	>98.176.TAA	>98.121.TAC
EKQIHYWFVNKRVKIKKS	EVQITAWFRNKRFKIKKS	EKQIQQWFWNKRCKIKKS	ERQICSWFSNKRFKIKKS	EQQIMWWFWNKRRKIKKS	ETQIASWFKNKRTKIKKS	ESQIRYWFDNKRRKIKKS	EKQIKFWFENKRKKIKKS	EAQIFRWFANKRHKIKKS	EQQISRWFNNKRVKIKKS	ERQIGKWFENKRGKIKKS	ETQIDKWFQNKRYKIKKS	ENQIKYWFNNKRWKIKKS	EFQILSWFTNKRSKIKKS	ERQITYWFQNKRTKIKKS	ESQIRVWFQNKRAKIKKS	EEQIFYWFANKRRKIKKS	EQQIAYWFSNKRRKIKKS	ELQIGNWFSNKRTKIKKS	ELQIVNWFSNKRRKIKKS	EKQIVYWFQNKRKKIKKS	EMQILTWFSNKRKKIKKS	EVQISYWFENKRRKIKKS	EKQITNWFHNKRKKIKKS	ETQIFYWFANKRAKIKKS	EIQIMWWFSNKRRKIKKS	EMQISHWFENKRRKIKKS	ERQILGWFVNKRVKIKKS	ETQIMYWFSNKRRKIKKS	ESQIYNWFSNKRRKIKKS	EKQILNWFQNKRSKIKKS	ELQIYNWFANKRKKIKKS	EMQISNWFKNKRWKIKKS	EGQIARWFRNKRFKIKKS	EKQIQRWFWNKRYKIKKS	ESQIAKWFVNKRWKIKKS	ERQITKWFQNKRMKIKKS	ERQIYAWFKNKRYKIKKS	ERQIYAWFKNKRSKIKKS	EQQIYHWFRNKRYKIKKS	EIQILKWFDNKRQKIKKS	EYQINKWFNNKRQKIKKS	EGQIAKWFENKRRKIKKS	ERQISKWFDNKRYKIKKS	EVQIVRWFQNKRAKIKKS	EPQIKSWFLNKR_KIKKS	EMQISVWFQNKRYKIKKS	ESQIARWFANKRFKIKKS	EAQIQVWFANKRAKIKKS	EGQIRVWFSNKRAKIKKS
>99.340.AAA	>99.156.AAC	>99.373.AAG	>99.335.AAT	>99.355.ACA	>99.397.ACC	>99.287.ACG	>99.368.ACT	>99.316.AGA	>99.390.AGC	>99.364.AGG	>99.364.AGT	>99.322.ATA	>99.190.ATC	>99.358.ATG	>99.213.ATT	>99.131.CAA	>99.96.CAC	>99.608.CAG	>99.141.CAT	>99.261.CCA	>99.513.CCC	>99.447.CCG	>99.291.CCT	>99.463.CGA	>99.466.CGC	>99.197.CGG	>99.553.CGT	>99.397.CTA	>99.120.CTC	>99.41.CTG	>99.226.CTT	>99.97.GAA	>99.26.GAC	>99.129.GAG	>99.38.GAT	>99.61.GCA	>99.34.GCC	>99.47.GCG	>99.41.GCT	>99.144.GGA	>99.66.GGC	>99.240.GGG	>99.126.GGT	>99.72.GTA	>99.73.GTC	>99.118.GTG	>99.138.GTT	>99.174.TAA	>99.121.TAC
EKQISTWFANKRHKIKKS	EMQICSWFRNKRHKIKKS	ERQILQWFWNKRFKIKKS	EKQILSWFANKRFKIKKS	ERQIKNWFLNKRRKIKKS	EKQIMAWFHNKRMKIKKS	EKQIQRWFGNKRVKIKKS	EIQIVYWFHNKRTKIKKS	EVQISRWFVNKRYKIKKS	EKQIMRWFNNKRTKIKKS	EKQILKWFENKRCKIKKS	EKQIMEWFMNKRFKIKKS	EKQITMWFANKRAKIKKS	EIQIRMWFANKRYKIKKS	EVQIMCWFQNKRAKIKKS	ERQIVVWFQNKRAKIKKS	ERQIHNWFCNKRRKIKKS	EPQIGMWFRNKRRKIKKS	ELQISRWFWNKRRKIKKS	ESQILNWFSNKRRKIKKS	EKQIMNWFQNKRKKIKKS	EMQISHWFENKRRKIKKS	EVQIRDWFHNKRKKIKKS	EVQIRDWFHNKRKKIKKS	EKQITNWFGNKRQKIKKS	EYQIAYWFSNKRRKIKKS	EKQIARWFENKRRKIKKS	ERQIG_WFLNKRLKIKKS	EKQIDQWFANKRKKIKKS	ERQIMQWFSNKRKKIKKS	ELQIMYWFQNKRRKIKKS	EHQIVNWFSNKRKKIKKS	ESQIARWFQNKRWKIKKS	EEQIKRWFRNKRWKIKKS	ETQIKQWFWNKRYKIKKS	ELQIAVWFRNKRYKIKKS	EVQIGRWFQNKRAKIKKS	EGQIGRWFKNKRYKIKKS	EQQIADWFRNKRYKIKKS	ERQIVNWFRNKRFKIKKS	ELQISKWFDNKRQKIKKS	ETQIGKWFNNKRQKIKKS	EKQIMKWFENKRGKIKKS	EKQISKWFNNKRRKIKKS	EHQIRKWFQNKRQKIKKS	EMQIAKWFRNKRAKIKKS	EAQIQVWFQNKRYKIKKS	EMQIVVWFRNKRYKIKKS	ERQIRIWFCNKRAKIKKS	EEQIRVWFSNKRSKIKKS
>100.335.AAA	>100.156.AAC	>100.370.AAG	>100.335.AAT	>100.349.ACA	>100.389.ACC	>100.282.ACG	>100.360.ACT	>100.311.AGA	>100.390.AGC	>100.363.AGG	>100.359.AGT	>100.322.ATA	>100.186.ATC	>100.353.ATG	>100.213.ATT	>100.129.CAA	>100.96.CAC	>100.602.CAG	>100.141.CAT	>100.256.CCA	>100.508.CCC	>100.444.CCG	>100.287.CCT	>100.460.CGA	>100.463.CGC	>100.184.CGG	>100.550.CGT	>100.397.CTA	>100.120.CTC	>100.40.CTG	>100.225.CTT	>100.96.GAA	>100.26.GAC	>100.127.GAG	>100.38.GAT	>100.60.GCA	>100.33.GCC	>100.47.GCG	>100.41.GCT	>100.143.GGA	>100.66.GGC	>100.240.GGG	>100.125.GGT	>100.71.GTA	>100.72.GTC	>100.118.GTG	>100.134.GTT	>100.165.TAA	>100.120.TAC
ERQILTWFANKRHKIKKS	EQQIMVWFRNKRWKIKKS	EKQICQWFWNKRFKIKKS	EKQISAWFNNKRFKIKKS	ERQIKNWFNNKRRKIKKS	EMQIATWFSNKRKKIKKS	EAQIRWWFENKRRKIKKS	ERQIKFWFQNKRSKIKKS	ELQIDTWFRNKRYKIKKS	EKQIQQWFSNKRSKIKKS	ENQINKWFENKRYKIKKS	EKQIKSWFQNKRWKIKKS	ERQIVTWFRNKRVKIKKS	ENQIWRWFGNKRSKIKKS	EKQIVYWFQNKRGKIKKS	ERQITVWFQNKRSKIKKS	ELQIHYWFANKRSKIKKS	ESQIMNWFSNKRRKIKKS	ERQISNWFWNKRRKIKKS	EKQIAGWFSNKRRKIKKS	ENQIHYWFCNKRKKIKKS	EVQIMYWFSNKRKKIKKS	EVQITNWFGNKRKKIKKS	EVQIMNWFSNKRKKIKKS	EQQIFHWFSNKRKKIKKS	ERQISNWFSNKRRKIKKS	ERQIARWFENKRRKIKKS	EVQIVHWFSNKRRKIKKS	ERQIHYWFANKRKKIKKS	EKQIGYWFSNKRKKIKKS	ESQIAFWFQNKRKKIKKS	EVQIAHWFGNKRKKIKKS	ETQINHWFKNKRFKIKKS	EDQIGRWFRNKRWKIKKS	EKQINRWFWNKRWKIKKS	ERQIMVWFRNKRWKIKKS	EVQISKWFSNKRSKIKKS	ESQIYYWFKNKRYKIKKS	ELQIAKWFANKRYKIKKS	ERQITDWFRNKRYKIKKS	ERQISKWFDNKRMKIKKS	ETQISKWFNNKRVKIKKS	EMQIAKWFENKRRKIKKS	EHQIAKWFDNKRQKIKKS	EEQIIKWFQNKRMKIKKS	EHQIRKWFSNKRGKIKKS	ECQILRWFENKRYKIKKS	EHQIRVWFANKRFKIKKS	ERQIVLWFRNKRSKIKKS	ESQIRIWFSNKRAKIKKS
>101.328.AAA	>101.156.AAC	>101.366.AAG	>101.332.AAT	>101.348.ACA	>101.379.ACC	>101.276.ACG	>101.344.ACT	>101.309.AGA	>101.390.AGC	>101.360.AGG	>101.354.AGT	>101.322.ATA	>101.182.ATC	>101.350.ATG	>101.211.ATT	>101.129.CAA	>101.95.CAC	>101.602.CAG	>101.141.CAT	>101.254.CCA	>101.500.CCC	>101.443.CCG	>101.286.CCT	>101.454.CGA	>101.462.CGC	>101.183.CGG	>101.546.CGT	>101.392.CTA	>101.119.CTC	>101.40.CTG	>101.221.CTT	>101.95.GAA	>101.26.GAC	>101.127.GAG	>101.38.GAT	>101.59.GCA	>101.33.GCC	>101.46.GCG	>101.40.GCT	>101.143.GGA	>101.65.GGC	>101.238.GGG	>101.125.GGT	>101.71.GTA	>101.72.GTC	>101.113.GTG	>101.133.GTT	>101.156.TAA	>101.120.TAC
ERQIATWFSNKRHKIKKS	ENQINAWFRNKRFKIKKS	ERQITQWFWNKRFKIKKS	ERQIAAWFTNKRFKIKKS	ESQIYNWFNNKRRKIKKS	EFQIRTWFKNKRTKIKKS	EVQIVNWFENKRRKIKKS	EAQIKDWFQNKRKKIKKS	EKQIHYWFCNKRTKIKKS	ESQIMTWFKNKRYKIKKS	ERQISKWFENKRAKIKKS	ERQISKWFENKRRKIKKS	EKQIICWFNNKRAKIKKS	E_QIGWWFFNKRFKIKKS	ERQITYWFQNKRWKIKKS	ETQIRVWFQNKRAKIKKS	EVQIFYWFSNKRRKIKKS	EEQIRQWFSNKRRKIKKS	EMQICWWFWNKRRKIKKS	ELQIASWFSNKRRKIKKS	ERQITMWFQNKRKKIKKS	ETQITNWFSNKRKKIKKS	EVQIRDWFHNKRRKIKKS	EQQITDWFHNKRRKIKKS	EIQIFHWFANKRRKIKKS	ERQITMWFSNKRRKIKKS	EAQIVHWFENKRRKIKKS	EVQISNWFGNKRMKIKKS	ERQIHSWFANKRKKIKKS	ERQILFWFGNKRKKIKKS	ERQIMYWFWNKRKKIKKS	ETQIAMWFSNKRRKIKKS	EVQISDWFKNKRWKIKKS	EKQITRWFRNKRWKIKKS	EQQIMVWFWNKRYKIKKS	ELQIAIWFRNKRYKIKKS	EYQIIRWFQNKRAKIKKS	EVQIKVWFKNKRYKIKKS	EYQITDWFRNKRYKIKKS	ELQIMDWFRNKRFKIKKS	EGQIAKWFDNKRQKIKKS	ERQIGKWFNNKRLKIKKS	EGQIMKWFENKRRKIKKS	EKQITKWFSNKRVKIKKS	ELQIMKWFQNKRVKIKKS	EVQIGKWFRNKRAKIKKS	ESQIAKWFENKRFKIKKS	ERQIMLWFRNKRYKIKKS	ERQIITWFSNKRAKIKKS	ETQIRVWFSNKRSKIKKS
>102.327.AAA	>102.155.AAC	>102.365.AAG	>102.330.AAT	>102.343.ACA	>102.378.ACC	>102.260.ACG	>102.336.ACT	>102.305.AGA	>102.386.AGC	>102.357.AGG	>102.353.AGT	>102.321.ATA	>102.178.ATC	>102.350.ATG	>102.210.ATT	>102.128.CAA	>102.94.CAC	>102.595.CAG	>102.141.CAT	>102.253.CCA	>102.497.CCC	>102.435.CCG	>102.284.CCT	>102.448.CGA	>102.452.CGC	>102.182.CGG	>102.544.CGT	>102.390.CTA	>102.119.CTC	>102.40.CTG	>102.218.CTT	>102.94.GAA	>102.26.GAC	>102.126.GAG	>102.37.GAT	>102.59.GCA	>102.32.GCC	>102.46.GCG	>102.40.GCT	>102.142.GGA	>102.65.GGC	>102.231.GGG	>102.125.GGT	>102.70.GTA	>102.68.GTC	>102.112.GTG	>102.133.GTT	>102.154.TAA	>102.119.TAC
ERQINSWFANKRFKIKKS	EGQITSWFRNKRFKIKKS	ERQIAQWFWNKRCKIKKS	EHQIGGWFSNKRVKIKKS	ETQIKNWFWNKRRKIKKS	EKQIRYWFENKRKKIKKS	EAQIRYWFENKRRKIKKS	ERQIKYWFENKRAKIKKS	ENQIFRWFANKRWKIKKS	ERQIRDWFRNKRMKIKKS	ERQILKWFENKRSKIKKS	EGQIMRWFGNKRLKIKKS	EKQIGSWFSNKRAKIKKS	EGQIVQWFWNKRYKIKKS	ETQITYWFQNKRFKIKKS	ERQIIVWFQNKRQKIKKS	EMQIHYWFVNKRRKIKKS	EKQIMMWFSNKRRKIKKS	EAQISRWFWNHTRKIKKS	EIQIVNWFSNKRRKIKKS	EMQIMMWFQNKRKKIKKS	EMQISNWFSNKRKKIKKS	EVQIVYWFENKRKKIKKS	ERQISDWFSNKRKKIKKS	ELQIFNWFANKRKKIKKS	EMQIHNWFSNKRRKIKKS	ELQITRWFENKRRKIKKS	ETQINNWFSNKRRKIKKS	ESQIANWFANKRRKIKKS	ETQIRFWFANKRKKIKKS	ECQITNWFENKRRKIKKS	ELQIVYWFGNKRKKIKKS	EKQIDRWFQNKRWKIKKS	EVQIVRWFRNKRFKIKKS	ERQIERWFWNKRYKIKKS	EYQICVWFRNKRYKIKKS	EKQISKWFQNKREKIKKS	ERQIGIWFKNKRFKIKKS	ECQIRMWFHNKRWKIKKS	ENQIMNWFRNKRFKIKKS	ERQITKWFDNKRAKIKKS	EGQIIKWFNNKRMKIKKS	ERQILKWFENKRAKIKKS	EQQIVKWFSNKRSKIKKS	EVQIVRWFQNKRMKIKKS	ETQIGKWFRNKRAKIKKS	EYQIRRWFENKRHKIKKS	ECQILKWFANKRHKIKKS	EIQISTWFCNKRAKIKKS	ENQIRLWFSNKRAKIKKS
>103.325.AAA	>103.154.AAC	>103.364.AAG	>103.328.AAT	>103.340.ACA	>103.378.ACC	>103.254.ACG	>103.325.ACT	>103.305.AGA	>103.385.AGC	>103.357.AGG	>103.348.AGT	>103.321.ATA	>103.177.ATC	>103.347.ATG	>103.208.ATT	>103.128.CAA	>103.93.CAC	>103.589.CAG	>103.141.CAT	>103.252.CCA	>103.494.CCC	>103.421.CCG	>103.280.CCT	>103.444.CGA	>103.451.CGC	>103.181.CGG	>103.534.CGT	>103.386.CTA	>103.119.CTC	>103.39.CTG	>103.217.CTT	>103.94.GAA	>103.25.GAC	>103.123.GAG	>103.37.GAT	>103.58.GCA	>103.32.GCC	>103.46.GCG	>103.40.GCT	>103.140.GGA	>103.63.GGC	>103.230.GGG	>103.125.GGT	>103.70.GTA	>103.68.GTC	>103.111.GTG	>103.133.GTT	>103.153.TAA	>103.119.TAC
ERQIGTWFANKRFKIKKS	EKQIGSWFRNKRFKIKKS	ERQISQWFWNKRFKIKKS	ERQIMAWFSNKRFKIKKS	EMQILNWFNNKRRKIKKS	EWQIMAWFKNKRYKIKKS	EKQISYWFDNKRRKIKKS	EQQIKTWFKNKRYKIKKS	EQQIRRWFNNKRWKIKKS	ERQIYYWFRNKRVKIKKS	ESQISKWFENKRYKIKKS	ERQIVKWFENKRAKIKKS	ERQIMSWFANKRAKIKKS	EEQIQQWFLNKRWKIKKS	EVQIIYWFQNKRVKIKKS	ERQIKVWFWNKRAKIKKS	EKQITNWFVNKRRKIKKS	EPQIAMWFSNKRRKIKKS	EPQIMNWFMNKRRKIKKS	ERQILQWFSNKRRKIKKS	ERQIMQWFQNKRKKIKKS	ERQIMDWFHNKRKKIKKS	ERQIVYWFENKRKKIKKS	EKQITDWFSNKRKKIKKS	ENQIFYWFSNKRAKIKKS	EIQIVYWFSNKRRKIKKS	ELQITRWFCNKRPKIKKS	ELQILNWFSNKRRKIKKS	ETQITYWFANKRKKIKKS	ETQIKWWFSNKRKKIKKS	EMQIRFWFENKRKKIKKS	ETQIKHWFANKRKKIKKS	EMQIRRWFQNKRWKIKKS	EGQISRWFRNKRWKIKKS	EVQIMTWFWNKRYKIKKS	ELQILNWFRNKRYTIKKS	EEQILRWFQNKRWKIKKS	EMQIYRWFKNKRYKIKKS	ECQIGCWFGNKRLKIKKS	ERQIMGWFKNKRWKIKKS	ERQIAKWFDNKRAKIKKS	EEQIKKWFSNKRSKIKKS	ERQIVKWFENKRGKIKKS	ELQILKWFDNKRQKIKKS	ERQISRWFDNKRWKIKKS	ERQIRRWFQNKRFKIKKS	EHQIRKWFENKRWKIKKS	EMQISRWFGNKRQKIKKS	EKQILVWFANKRSKIKKS	EYQIMRWFINKRAKIKKS
>104.321.AAA	>104.153.AAC	>104.363.AAG	>104.325.AAT	>104.337.ACA	>104.369.ACC	>104.251.ACG	>104.324.ACT	>104.304.AGA	>104.384.AGC	>104.355.AGG	>104.346.AGT	>104.319.ATA	>104.171.ATC	>104.333.ATG	>104.207.ATT	>104.127.CAA	>104.93.CAC	>104.581.CAG	>104.140.CAT	>104.249.CCA	>104.489.CCC	>104.418.CCG	>104.278.CCT	>104.444.CGA	>104.450.CGC	>104.170.CGG	>104.512.CGT	>104.385.CTA	>104.118.CTC	>104.37.CTG	>104.216.CTT	>104.93.GAA	>104.25.GAC	>104.121.GAG	>104.37.GAT	>104.58.GCA	>104.31.GCC	>104.46.GCG	>104.40.GCT	>104.135.GGA	>104.63.GGC	>104.227.GGG	>104.124.GGT	>104.70.GTA	>104.68.GTC	>104.107.GTG	>104.132.GTT	>104.153.TAA	>104.119.TAC
ERQIQCWFANKRFKIKKS	ESQIVSWFRNKRFKIKKS	ELQIKQWFWNKRYKIKKS	ENQISCWFSNKRHKIKKS	EKQIKQWFQNKRRKIKKS	ETQIANWFHNKRTKIKKS	EKQIIRWFENKRRKIKKS	EKQIRYWFENKRRKIKKS	ERQIFRWFANKRHKIKKS	ENQIRRWFSNKRVKIKKS	EKQIKKWFENKRRKIKKS	ERQITKWFENKRFKIKKS	ERQIAAWFANKRVKIKKS	EMQILSWFLNKRVKIKKS	EKQIMYWFQNKRFKIKKS	EVQIKIWFQNKRSKIKKS	EKQILNWFANKRRKIKKS	ELQISMWFRNKRRKIKKS	ESQILSWFSNKRRKIKKS	EKQIASWFSNKRRKIKKS	EKQILTWFANKRKKIKKS	ERQISMWFSNKRKKIKKS	EMQIVNWFQNKRKKIKKS	EVQISNWFANKRKKIKKS	EVQIFNWFANKRKKIKKS	ETQILNWFSNKRRKIKKS	ESQITRWFENKRRKIKKS	EVQIANWFSNKRRKIKKS	EKQIHYWFANKRKKIKKS	EMQIANWFKNKRKKIKKS	ERQIPNWFANKRSKIKKS	EQQIKYWFGNKRKKIKKS	ESQIAHWFKNKRFKIKKS	ERQIERWFRNKRFKIKKS	EKQISAWFWNKRYKIKKS	EFQIMVWFRNKRYKIKKS	ERQITDWFRNKRMKIKKS	ESQIRTWFKNKRFKIKKS	ELQIQDWFRNKRYKIKKS	ERQIRIWFKNKRFKIKKS	EHQISKWFDNKRQKIKKS	EGQILKWFNNKRQKIKKS	EKQIMKWFENKRLKIKKS	EKQIIKWFDNKRYKIKKS	EMQIRRWFDNKRAKIKKS	EVQISKWFRNKRFKIKKS	EYQICRWFENKRYKIKKS	EGQIRVWFANKRYKIKKS	ERQIQLWFANKRAKIKKS	EWQIRIWFSNKRAKIKKS
>105.318.AAA	>105.153.AAC	>105.360.AAG	>105.323.AAT	>105.336.ACA	>105.363.ACC	>105.244.ACG	>105.321.ACT	>105.302.AGA	>105.380.AGC	>105.353.AGG	>105.343.AGT	>105.318.ATA	>105.163.ATC	>105.330.ATG	>105.205.ATT	>105.127.CAA	>105.93.CAC	>105.581.CAG	>105.140.CAT	>105.245.CCA	>105.486.CCC	>105.412.CCG	>105.268.CCT	>105.441.CGA	>105.450.CGC	>105.168.CGG	>105.503.CGT	>105.383.CTA	>105.116.CTC	>105.37.CTG	>105.215.CTT	>105.93.GAA	>105.25.GAC	>105.120.GAG	>105.37.GAT	>105.57.GCA	>105.31.GCC	>105.46.GCG	>105.40.GCT	>105.135.GGA	>105.62.GGC	>105.226.GGG	>105.124.GGT	>105.70.GTA	>105.67.GTC	>105.107.GTG	>105.132.GTT	>105.153.TAA	>105.118.TAC
EKQIKYWFVNKRHKIKKS	ESQICSWFRNKRHKIKKS	EYQIMQWFWNKRHKIKKS	ETQITNWFSNKRFKIKKS	EMQIKHWFWNKRRKIKKS	ERQITSWFHNKRQKIKKS	EKQIRHWFENKRRKIKKS	EEQIWPWFDNKRWKIKKS	EGQISNWFCNKRWKIKKS	ENQIRMWFSNKRVKIKKS	ERQILTWFRNKRLKIKKS	ERQIRKWFENKRFKIKKS	EKQIVSWFQNKRAKIKKS	ELQIAGWFHNKRPKIKKS	EHQIIYWFQNKRSKIKKS	EVQIRVWFQNKRRKIKKS	EMQISYWFQNKRRKIKKS	EMQIMIWFRNKRRKIKKS	EMQISWWFWNKRRKIKKS	EGQIGQWFSNKRRKIKKS	EHQIATWFQNKRKKIKKS	ESQIRDWFHNKRKKIKKS	ELQIIYWFENKRRKIKKS	EAQIANWFGNKRKKIKKS	EVQIFNWFSNKRRKIKKS	EAQIRNWFSNKRRKIKKS	EQQIIHWFENKRRKIKKS	EKQIGWWFGNKRAKIKKS	ERQIHHWFANKRRKIKKS	EMQITYWFGNKRKKIKKS	EKQIRYWFENKRAKIKKS	EQQICHWFANKRRKIKKS	EVQIGRWFQNKRWKIKKS	EGQITRWFRNKRWKIKKS	ERQISRWFWNKRYKIKKS	ERQIDKWFVNKRYKIKKS	EGQITKWFQNKRMKIKKS	ELQIRIWFKNKRFKIKKS	ERQILDWFRNKRFKIKKS	ERQIILWFKNKRFKIKKS	EKQIGKWFDNKRHKIKKS	EGQILKWFNNKRQKIKKS	EVQISKWFENKRAKIKKS	EGQIGKWFDNKRQKIKKS	ERQILKWFQNKRVKIKKS	EGQITKWFRNKRYKIKKS	ERQITKWFENKRWKIKKS	EVQIATWFANKRYKIKKS	EQQIGTWFANKRAKIKKS	EMQIRIWFSNKRAKIKKS
>106.316.AAA	>106.152.AAC	>106.359.AAG	>106.319.AAT	>106.336.ACA	>106.356.ACC	>106.244.ACG	>106.321.ACT	>106.301.AGA	>106.379.AGC	>106.349.AGG	>106.342.AGT	>106.316.ATA	>106.156.ATC	>106.329.ATG	>106.205.ATT	>106.125.CAA	>106.92.CAC	>106.573.CAG	>106.140.CAT	>106.238.CCA	>106.474.CCC	>106.403.CCG	>106.261.CCT	>106.439.CGA	>106.443.CGC	>106.167.CGG	>106.497.CGT	>106.381.CTA	>106.114.CTC	>106.37.CTG	>106.214.CTT	>106.93.GAA	>106.25.GAC	>106.117.GAG	>106.37.GAT	>106.56.GCA	>106.31.GCC	>106.45.GCG	>106.40.GCT	>106.134.GGA	>106.61.GGC	>106.222.GGG	>106.124.GGT	>106.69.GTA	>106.66.GTC	>106.104.GTG	>106.130.GTT	>106.150.TAA	>106.116.TAC
EKQIVSWFSNKRHKIKKS	EMQIAQWFRNKRFKIKKS	EYQIKQWFWNKRFKIKKS	EKQIKYWFQNKRTKIKKS	ESQISDWFNNKRRKIKKS	ERQIQNWFHNKRVKIKKS	ELQIHFWFGNKRGKIKKS	EAQIAMWFANKRMKIKKS	ESQIRTWFCNKRYKIKKS	ERQIRMWFSNKRVKIKKS	EKQIMKWFENKRMKIKKS	EKQIKKWFENKRCKIKKS	ERQIVYWFVNKRNKIKKS	EVQILTWFPNKRRKIKKS	EAQIMVWFQNKRDKIKKS	EIQITVWFQNKRAKIKKS	ELQIHNWFCNKRRKIKKS	EVQIANWFRNKRRKIKKS	EVQISWWFWNKRRKIKKS	ERQIVNWFSNKRRKIKKS	ERQIMMWFQNKRKKIKKS	ELQIITWFSNKRKKIKKS	ETQIQYWFENKRRKIKKS	ELQILNWFSNKRKKIKKS	EQQIFHWFANKRKKIKKS	EKQIAYWFSNKRRKIKKS	ETQIRHWFENKRRKIKKS	ESQISNWFSNKRRKIKKS	ERQIHCWFSNKRKKIKKS	ERQIRFWFANKRKKIKKS	EKQIGYWFENKRKKIKKS	EQQIGCWFANKRRKIKKS	EGQINRWFQNKRWKIKKS	EGQIVRWFRNKRWKIKKS	ELQIARWFWNKRYKIKKS	ETQIAKWFVNKRFKIKKS	EVQIMRWFQNKRMKIKKS	ERQIWCWFKNKRWKIKKS	ELQIMDWFRNKRYKIKKS	EWQIMNWFRNKRYKIKKS	EPQIVKWFDNKRQKIKKS	ESQIRKWFSNKRQKIKKS	ELQIMKWFENKRFKIKKS	EHQISKWFNNKRVKIKKS	EKQISKWFDNKRWKIKKS	ERQISKWFRNKRAKIKKS	EGQIGRWFENKRFKIKKS	EQQILRWFGNKRWKIKKS	EVQIAVWFCNKRAKIKKS	EEQIRVWFSNKRVKIKKS
>107.315.AAA	>107.152.AAC	>107.359.AAG	>107.318.AAT	>107.332.ACA	>107.351.ACC	>107.242.ACG	>107.309.ACT	>107.300.AGA	>107.379.AGC	>107.348.AGG	>107.341.AGT	>107.316.ATA	>107.155.ATC	>107.323.ATG	>107.204.ATT	>107.125.CAA	>107.92.CAC	>107.573.CAG	>107.140.CAT	>107.238.CCA	>107.472.CCC	>107.403.CCG	>107.260.CCT	>107.437.CGA	>107.442.CGC	>107.167.CGG	>107.484.CGT	>107.377.CTA	>107.111.CTC	>107.37.CTG	>107.213.CTT	>107.92.GAA	>107.25.GAC	>107.117.GAG	>107.37.GAT	>107.56.GCA	>107.30.GCC	>107.45.GCG	>107.40.GCT	>107.134.GGA	>107.60.GGC	>107.219.GGG	>107.124.GGT	>107.69.GTA	>107.65.GTC	>107.102.GTG	>107.129.GTT	>107.149.TAA	>107.115.TAC
EKQIMSWFANKRFKIKKS	EKQICAWFRNKRFKIKKS	ERQITQWFWNKRFKIKKS	ERQIACWFVNKRFKIKKS	ELQIARWFWNKRRKIKKS	ELQITYWFHNKRMKIKKS	EQQIKWWFENKRRKIKKS	ERQISAWFHNKRMKIKKS	EQQIFRWFANKRHKIKKS	ETQIVRWFNNKRVKIKKS	EKQILKWFENKRLKIKKS	ETQIVRWFENKRFKIKKS	EAQISSWFSNKRQKIKKS	ECQIVRWFDNKRCKIKKS	ECQIASWFENKR_KIKKS	EKQIKNWFQNKRMKIKKS	ETQIMHWFQNKRRKIKKS	ELQIMYWFSNKRRKIKKS	ESQISSWFSNKREKIKKS	EPQIANWFSNKRRKIKKS	EIQITMWFQNKRKKIKKS	EDQISNWFSNKRKKIKKS	ETQISNWFMNKRKKIKKS	EAQISNWFSNKRKKIKKS	EVQIANWFANKRAKIKKS	ERQIAGWFSNKRRKIKKS	EMQITRWFENKRRKIKKS	EAQIAHWFSNKRRKIKKS	ERQIMTWFNNKRKKIKKS	ERQIRMWFSNKRKKIKKS	ERQILNWFQNKRNKIKKS	EHQILNWFSNKRKKIKKS	EEQIKRWFQNKRWKIKKS	ESQITRWFRNKRWKIKKS	ETQIMRWFWNKRFKIKKS	EVQIAKWFVNKRWKIKKS	ERQIYDWFRNKRQKIKKS	ERQIMTWFKNKRFKIKKS	EVQILDWFRNKRYKIKKS	EAQITDWFRNKRYKIKKS	EEQIAKWFDNKRYKIKKS	ESQIRKWFNNKRQKIKKS	ERQILKWFENKRAKIKKS	EYQISKWFDNKRYKIKKS	ETQIARWFQNKRVKIKKS	ELQIAKWFRNKRFKIKKS	EGQIRRWFENKRYKIKKS	EAQIVRWFGNKRYKIKKS	EKQILVWFANKRSKIKKS	ENQIRVWFSNKRVKIKKS
>108.311.AAA	>108.152.AAC	>108.358.AAG	>108.317.AAT	>108.332.ACA	>108.350.ACC	>108.239.ACG	>108.283.ACT	>108.299.AGA	>108.376.AGC	>108.347.AGG	>108.337.AGT	>108.314.ATA	>108.153.ATC	>108.323.ATG	>108.201.ATT	>108.125.CAA	>108.92.CAC	>108.569.CAG	>108.139.CAT	>108.238.CCA	>108.470.CCC	>108.402.CCG	>108.257.CCT	>108.436.CGA	>108.439.CGC	>108.166.CGG	>108.473.CGT	>108.376.CTA	>108.100.CTC	>108.37.CTG	>108.211.CTT	>108.91.GAA	>108.25.GAC	>108.116.GAG	>108.37.GAT	>108.55.GCA	>108.29.GCC	>108.44.GCG	>108.40.GCT	>108.133.GGA	>108.60.GGC	>108.216.GGG	>108.124.GGT	>108.69.GTA	>108.65.GTC	>108.101.GTG	>108.129.GTT	>108.148.TAA	>108.115.TAC
ELQIYYWFVNKRAKIKKS	EMQIGQWFRNKRFKIKKS	ERQISSWFMNKRAKIKKS	EAQITSWFSNKRFKIKKS	EMQITYWFWNKRRKIKKS	EKQIAYWFHNKRTKIKKS	EVQICRWFPNKRTKIKKS	ETQIKNWFQNKRKKIKKS	EMQINRWFWNKRYKIKKS	ECQISSWFRNKRAKIKKS	EVQISKWFENKRTKIKKS	EVQIRKWFENKRFKIKKS	ERQIMVWFANKRTKIKKS	EFQIHSWFGNKRPKIKKS	ERQIYYWFQNKRSKIKKS	EQQIRLWFQNKRAKIKKS	EVQIHNWFCNKRRKIKKS	ENQISQWFRNKRRKIKKS	GLNEGQICFSFRPKIKKS	EMQISTWFSNKRRKIKKS	EGQIGNWFANKRKKIKKS	ESQIHNWFSNKRKKIKKS	ERQIACWFENKRKKIKKS	ESQIVNWFSNKRKKIKKS	EVQIFNWFANKRRKIKKS	EKQICMWFNNKRRKIKKS	EKQINRWFENKRRKIKKS	EKQIGYWFSNKRRKIKKS	EVQIQYWFANKRRKIKKS	ESQIRYWFANKRKKIKKS	EKQINQWFENKRKKIKKS	EVQILYWFGNKRRKIKKS	ERQINRWFQNKRWKIKKS	EEQIVRWFRNKRFKIKKS	ERQINVWFWNKRYKIKKS	EDQIRVWFSNKRYKIKKS	EKQILRWFQNKRQKIKKS	EFQIQIWFKNKRYKIKKS	EMQISDWFRNKRFKIKKS	EYQITNWFRNKRYKIKKS	EGQISKWFDNKRFKIKKS	ERQIVKWFSNKRMKIKKS	ERQIDKWFDNKRYKIKKS	EQQIAKWFNNKRVKIKKS	EMQITKWFQNKRMKIKKS	EIQIRRWFGNKRFKIKKS	ERQISKWFENKRRKIKKS	EVQIQKWFANKRAKIKKS	ERQIMSWFSNKRAKIKKS	EEQIRLWFSNKRAKIKKS
>109.310.AAA	>109.151.AAC	>109.355.AAG	>109.313.AAT	>109.331.ACA	>109.348.ACC	>109.230.ACG	>109.283.ACT	>109.296.AGA	>109.373.AGC	>109.346.AGG	>109.336.AGT	>109.311.ATA	>109.148.ATC	>109.321.ATG	>109.198.ATT	>109.124.CAA	>109.92.CAC	>109.566.CAG	>109.139.CAT	>109.238.CCA	>109.469.CCC	>109.394.CCG	>109.257.CCT	>109.436.CGA	>109.438.CGC	>109.166.CGG	>109.471.CGT	>109.373.CTA	>109.97.CTC	>109.37.CTG	>109.209.CTT	>109.90.GAA	>109.25.GAC	>109.114.GAG	>109.36.GAT	>109.54.GCA	>109.29.GCC	>109.44.GCG	>109.39.GCT	>109.131.GGA	>109.56.GGC	>109.215.GGG	>109.123.GGT	>109.69.GTA	>109.65.GTC	>109.96.GTG	>109.128.GTT	>109.148.TAA	>109.114.TAC
ETQIRHWFVNKRHKIKKS	ETQIAAWFRNKRFKIKKS	ELQIKQWFWNKRHKIKKS	EKQIAGWFANKRFKIKKS	EKQIYNWFNNKRRKIKKS	EMQILNWFSNKRKKIKKS	ERQILWWFCNKRRKIKKS	ENQISCWFHNKRVKIKKS	ERQIERWFVNKRYKIKKS	EVQIYSWFRNKRSKIKKS	EPQILKWFENKRYKIKKS	EKQIDKWFQNKRAKIKKS	ERQISSWFANKRVKIKKS	EWQIPIWFYNKRSKIKKS	ESQIVYWFQNKRVKIKKS	ELQIRIWFQNKRAKIKKS	EAQIAYWFANKRRKIKKS	EAQIRMWFSNKRRKIKKS	EGQITGWFGNKRRKIKKS	ERQIGCWFSNKRRKIKKS	EKQIAQWFANKRKKIKKS	EVQIQTWFSNKRKKIKKS	ERQIQHWFENKRKKIKKS	ERQISDWFGNKRKKIKKS	ERQIFYWFANKRGKIKKS	ESQIVSWFSNKRRKIKKS	EHQISRWFENKRRKIKKS	E_QIMVWFYNKRAKIKKS	ETQIGYWFANKRRKIKKS	EKQIQYWFENKRRKIKKS	ETQITNWFQNKRKKIKKS	EKQIMFWFGNKRKKIKKS	EVQIARWFQNKRWKIKKS	EYQIARWFRNKRWKIKKS	EYQISRWFWNKRYKIKKS	EVQIQVWFRNKRYKIKKS	ERQIHDWFRNKRAKIKKS	ERQIILWFKNKRFKIKKS	EQQIADWFRNKRAKIKKS	EGQITVWFKNKRYKIKKS	ETQISKWFDNKRQKIKKS	EGQITKWFNNKRTKIKKS	ERQISKWFENKRSKIKKS	EGQIAKWFDNKRVKIKKS	EWQICKWFQNKRSKIKKS	EQQIAKWFRNKRAKIKKS	ERQISKWFENKRRKIKKS	EHQIQVWFANKRYKIKKS	ERQIRIWFANKRAKIKKS	EEQIRVWFSNKRSKIKKS
>110.309.AAA	>110.151.AAC	>110.353.AAG	>110.311.AAT	>110.331.ACA	>110.348.ACC	>110.226.ACG	>110.283.ACT	>110.293.AGA	>110.371.AGC	>110.338.AGG	>110.336.AGT	>110.310.ATA	>110.140.ATC	>110.316.ATG	>110.196.ATT	>110.124.CAA	>110.92.CAC	>110.561.CAG	>110.139.CAT	>110.238.CCA	>110.468.CCC	>110.389.CCG	>110.256.CCT	>110.433.CGA	>110.436.CGC	>110.164.CGG	>110.469.CGT	>110.373.CTA	>110.95.CTC	>110.36.CTG	>110.204.CTT	>110.89.GAA	>110.25.GAC	>110.114.GAG	>110.36.GAT	>110.53.GCA	>110.29.GCC	>110.44.GCG	>110.39.GCT	>110.131.GGA	>110.54.GGC	>110.214.GGG	>110.119.GGT	>110.69.GTA	>110.65.GTC	>110.91.GTG	>110.128.GTT	>110.146.TAA	>110.113.TAC
ERQIKYWFVNKRHKIKKS	ESQIISWFRNKRFKIKKS	EPQISLWFLNKRSKIKKS	ERQITNWFNNKRFKIKKS	ERQIINWFNNKRRKIKKS	EWQIRGWFKNKRYKIKKS	EYQIVAWFKNKRYKIKKS	EWQIRAWFKNKRYKIKKS	ERQINRWFWNKRYKIKKS	EVQIRRWFSNKRVKIKKS	EFQISKWFENKRYKIKKS	ESQIRKWFENKRFKIKKS	ENQIKTWFNNKRAKIKKS	EMQIKVWFRNKRAKIKKS	ERQIVVWFMNKRCKIKKS	EGQIRTWFQNKRSKIKKS	EVQIHNWFVNKRRKIKKS	EQQISMWFRNKRRKIKKS	EQQISHWFWNKRRKIKKS	EKQIMTWFANKRRKIKKS	ERQIHNWFHNKRRKIKKS	ELQIVTWFSNKRKKIKKS	EKQIQDWFANKRKKIKKS	EVQISYWFSNKRKKIKKS	ERQIFDWFANKRRKIKKS	EQQIGYWFSNKRRKIKKS	EAQIACWFGNKRSKIKKS	EKQIGWWFNNKRRKIKKS	EMQIGYWFANKRKKIKKS	EIQIGYWFSNKRKKIKKS	ERQITMWFENKRKKIKKS	EMQIVNWFGNKRRKIKKS	ESQIHNWFRNKRWKIKKS	EMQIVRWFRNKRWKIKKS	ERQISTWFWNKRYKIKKS	EAQIMRWFMNKRYKIKKS	EVQIMRWFQNKRLKIKKS	ELQIYTWFKNKRYKIKKS	EGQIIDWFRNKRYKIKKS	ETQIRVWFKNKRFKIKKS	ERQIVKWFDNKRWKIKKS	EEQIRKWFNNKRFKIKKS	ENQILKWFENKRAKIKKS	ESQIAKWFDNKRMKIKKS	ESQIFNWFRNKRCKIKKS	ERQIGKWFRNKRQKIKKS	ELQINRWFSNKRQKIKKS	EFQISIWFRNKRFKIKKS	ERQILTWFANKRAKIKKS	EGQIIRWFINKRAKIKKS
>111.309.AAA	>111.151.AAC	>111.353.AAG	>111.310.AAT	>111.329.ACA	>111.345.ACC	>111.224.ACG	>111.282.ACT	>111.291.AGA	>111.371.AGC	>111.337.AGG	>111.335.AGT	>111.310.ATA	>111.137.ATC	>111.316.ATG	>111.194.ATT	>111.123.CAA	>111.92.CAC	>111.561.CAG	>111.138.CAT	>111.235.CCA	>111.468.CCC	>111.383.CCG	>111.256.CCT	>111.431.CGA	>111.435.CGC	>111.161.CGG	>111.467.CGT	>111.372.CTA	>111.95.CTC	>111.36.CTG	>111.204.CTT	>111.89.GAA	>111.25.GAC	>111.111.GAG	>111.36.GAT	>111.53.GCA	>111.28.GCC	>111.44.GCG	>111.39.GCT	>111.130.GGA	>111.54.GGC	>111.214.GGG	>111.118.GGT	>111.68.GTA	>111.64.GTC	>111.90.GTG	>111.127.GTT	>111.145.TAA	>111.113.TAC
EKQIAMWFSNKRFKIKKS	ERQILSWFRNKRFKIKKS	ELQIKQWFWNKRHKIKKS	EKQISAWFSNKRFKIKKS	ETQIRDWFTNKRRKIKKS	EVQIRNWFQNKRKKIKKS	EVQIIYWFENKRRKIKKS	EKQIVAWFHNKRMKIKKS	EKQINRWFWNKRYKIKKS	EQQISRWFNNKRVKIKKS	ERQIMKWFENKRSKIKKS	ERQIVKWFENKRFKIKKS	EVQIMAWFNNKRVKIKKS	EWQITTWFGNKRAEVKKS	EDQIVYWFQNKRWKIKKS	EKQIRVWFQNKRQKIKKS	ERQIADWFANKRRKIKKS	EVQIAMWFRNKRRKIKKS	EVQISYWFWNKRWKIKKS	ENQISMWFSNKRRKIKKS	ERQISNWFQNKRKKIKKS	EKQISDWFSNKRKKIKKS	ERQISNWFQNKRKKIKKS	EIQIYNWFANKRKKIKKS	ETQIMYWFQNKRSKIKKS	ETQIHYWFSNKRRKIKKS	EEQISHWFENKRRKIKKS	EVQINNWFSNKRRKIKKS	EKQITMWFQNKRKKIKKS	EVQIVYWFSNKRRKIKKS	EVQIRYWFSNKRKKIKKS	ERQIIYWFGNKRNKIKKS	EGQIARWFQNKRWKIKKS	ERQIERWFRNKRFKIKKS	ERQIARWFWNKRYKIKKS	EWQIMVWFRNKRYKIKKS	EEQILKWFQNKRAKIKKS	EGQIMRWFKNKRYKIKKS	EKQIKDWFRNKRYKIKKS	EAQINDWFRNKRYKIKKS	ERQISKWFDNKRQKIKKS	EGQITKWFSNKRQKIKKS	EGQIAKWFENKRSKIKKS	EVQIAKWFDNKRQKIKKS	ETQILRWFQNKRLKIKKS	EAQIQKWFRNKRFKIKKS	EVQIGKWFENKRYKIKKS	EPQIVKWFANKRWKIKKS	ERQIAVWFCNKRAKIKKS	EAQIRIWFSNKRAKIKKS
>112.307.AAA	>112.150.AAC	>112.353.AAG	>112.309.AAT	>112.324.ACA	>112.343.ACC	>112.221.ACG	>112.279.ACT	>112.278.AGA	>112.364.AGC	>112.336.AGG	>112.335.AGT	>112.308.ATA	>112.133.ATC	>112.314.ATG	>112.193.ATT	>112.122.CAA	>112.91.CAC	>112.557.CAG	>112.138.CAT	>112.235.CCA	>112.467.CCC	>112.373.CCG	>112.252.CCT	>112.427.CGA	>112.429.CGC	>112.160.CGG	>112.455.CGT	>112.371.CTA	>112.92.CTC	>112.36.CTG	>112.202.CTT	>112.89.GAA	>112.25.GAC	>112.110.GAG	>112.36.GAT	>112.52.GCA	>112.27.GCC	>112.43.GCG	>112.39.GCT	>112.127.GGA	>112.53.GGC	>112.214.GGG	>112.118.GGT	>112.68.GTA	>112.64.GTC	>112.89.GTG	>112.126.GTT	>112.143.TAA	>112.112.TAC
EKQIITWFNNKRHKIKKS	ERQIAAWFRNKRHKIKKS	EHQISQWFWNKRHKIKKS	ETQIGWWFPNKRTKIKKS	EKQIAGWFHNKRTKIKKS	ETQITSWFHNKRTKIKKS	ELQIKNWFCNKRKKIKKS	EGQIASWFGNKRAKIKKS	EQQIFRWFANKRWKIKKS	EHQIRMWFSNKRAKIKKS	EAQIEKWFENKRYKIKKS	ESQIRKWFENKRFKIKKS	ERQIVTWFNNKRAKIKKS	EPQINRWFSNKRRKIKKS	EKQIGIWFGNKRMKIKKS	ERQILIWFQNKRAKIKKS	EVQIMTWFQNKRRKIKKS	EEQIRQWFSNKRRKIKKS	EVQISLWFSNKRRKIKKS	EVQICNWFGNKRRKIKKS	EGQIHDWFANKRKKIKKS	ETQISNWFSNKRKKIKKS	EVQIRYWFENKRKKIKKS	ELQIVNWFSNKRKKIKKS	ELQITYWFQNKRMKIKKS	ESQIRDWFSNKRRKIKKS	ETQIGHWFENKRRKIKKS	EIQIMNWFSNKRRKIKKS	EKQILTWFQNKRKKIKKS	ELQIRYWFANKRKKIKKS	EVQITYWFWNKRKKIKKS	ERQIIYWFSNKRAKIKKS	EAQIFNWFKNKRFKIKKS	EEQIQRWFRNKRWKIKKS	EQQISVWFWNKRYKIKKS	EAQIQKWFVNKRYKIKKS	ECQILRWFQNKRRKIKKS	ETQIRHWFWNKRGKIKKS	EAQIGDWFRNKRYKIKKS	ERQIVDWFRNKRAKIKKS	ERQILKWFDNKRVKIKKS	ESQIMKWFNNKRMKIKKS	ELQILKWFENKRRKIKKS	EKQIVKWFSNKRMKIKKS	ELQIVKWFANKRWKIKKS	EVQIQRWFGNKRYKIKKS	ELQISRWFENKRFKIKKS	EQQIRVWFSNKRYKIKKS	ERQITVWFRNKRAKIKKS	EMQIRVWFSNKRAKIKKS
>113.305.AAA	>113.150.AAC	>113.352.AAG	>113.307.AAT	>113.323.ACA	>113.342.ACC	>113.214.ACG	>113.272.ACT	>113.276.AGA	>113.357.AGC	>113.334.AGG	>113.334.AGT	>113.307.ATA	>113.128.ATC	>113.306.ATG	>113.189.ATT	>113.121.CAA	>113.90.CAC	>113.555.CAG	>113.137.CAT	>113.233.CCA	>113.466.CCC	>113.372.CCG	>113.252.CCT	>113.427.CGA	>113.425.CGC	>113.158.CGG	>113.452.CGT	>113.370.CTA	>113.91.CTC	>113.35.CTG	>113.199.CTT	>113.88.GAA	>113.25.GAC	>113.110.GAG	>113.36.GAT	>113.52.GCA	>113.27.GCC	>113.43.GCG	>113.38.GCT	>113.126.GGA	>113.52.GGC	>113.210.GGG	>113.118.GGT	>113.68.GTA	>113.62.GTC	>113.89.GTG	>113.125.GTT	>113.141.TAA	>113.112.TAC
ETQISSWFSNKRHKIKKS	EHQISVWFRNKRFKIKKS	ERQIMQWFWNKRSKIKKS	ERQINAWFSNKRFKIKKS	ERQIMNWFLNKRRKIKKS	EVQIKYWFENKRRKIKKS	ERQIKNWFCNKRRKIKKS	EPQISRWFANKRIKIKKS	EYQITKWFQNKRVKIKKS	ERQIQYWFSNKRVKIKKS	ERQIRKWFENKRLKIKKS	EKQIKTWFENKRYKIKKS	ELQIVRWFANKRAKIKKS	EPQIQHWFHNKRVKIKKS	EKQIVYWFQNKRTKIKKS	EGQIRVWFQNKRAKIKKS	EVQIANWFVNKRRKIKKS	ELQIMYWFTNKRRKIKKS	ENQIQWWFWNKRRKIKKS	EKQIGQWFSNKRRKIKKS	EYQIMFWFQNKRKKIKKS	ERQILDWFSNKRKKIKKS	ERQITDWFQNKRRKIKKS	EKQIMMWFANKRKKIKKS	EKQIFYWFANKRTKIKKS	ESQIKDWFSNKRRKIKKS	ETQIGHWFENKRRKIKKS	ERQIVMWFSNKRRKIKKS	EVQIMYWFQNKRRKIKKS	EKQILQWFSNKRKKIKKS	EKQIMGWFMNKRKKIKKS	ERQIANWFSNKRKKIKKS	ERQIFQWFKNKRFKIKKS	EEQIVRWFRNKRWKIKKS	EKQIVRWFWNKRYKIKKS	EVQISVWFRNKRWKIKKS	EAQILKWFQNKRNKIKKS	EQQIRVWFKNKRWKIKKS	ELQIADWFRNKRFKIKKS	EQQINDWFRNKRYKIKKS	EQQISKWFDNKRQKIKKS	EYQILKWFNNKRTKIKKS	EMQIGKWFENKRRKIKKS	EQQIVKWFNNKRSKIKKS	EYQISRWFDNKRYKIKKS	EYQIMRWFANKRFKIKKS	EMQISKWFENKRFKIKKS	EVQIRVWFANKRFKIKKS	EKQILTWFANKRAKIKKS	EVQIRIWFSNKRAKIKKS
>114.304.AAA	>114.150.AAC	>114.352.AAG	>114.305.AAT	>114.320.ACA	>114.338.ACC	>114.208.ACG	>114.269.ACT	>114.275.AGA	>114.355.AGC	>114.334.AGG	>114.333.AGT	>114.307.ATA	>114.120.ATC	>114.306.ATG	>114.188.ATT	>114.121.CAA	>114.90.CAC	>114.553.CAG	>114.137.CAT	>114.232.CCA	>114.464.CCC	>114.371.CCG	>114.251.CCT	>114.422.CGA	>114.416.CGC	>114.149.CGG	>114.451.CGT	>114.368.CTA	>114.89.CTC	>114.35.CTG	>114.198.CTT	>114.88.GAA	>114.25.GAC	>114.109.GAG	>114.36.GAT	>114.52.GCA	>114.27.GCC	>114.42.GCG	>114.38.GCT	>114.126.GGA	>114.51.GGC	>114.208.GGG	>114.117.GGT	>114.67.GTA	>114.62.GTC	>114.87.GTG	>114.125.GTT	>114.140.TAA	>114.112.TAC
ETQIRYWFVNKRAKIKKS	ERQIMSWFRNKRFKIKKS	EKQIAQWFWNKRYKIKKS	EVQISRWFVNKRFKIKKS	EIQISHWFWNKRRKIKKS	EKQIAAWFHNKRTKIKKS	EKQIIYWFDNKRRKIKKS	ERQIQNWFGNKRTKIKKS	ENQIFRWFANKRFKIKKS	ELQIARWFANKRGKIKKS	EVQIMKWFENKRYKIKKS	EKQIMKWFENKRWKIKKS	ENQIVYWFNNKRSKIKKS	ERQIRMWFANKRWKIKKS	EKQITFWFQNKRWKIKKS	EAQIRNWFQNKRSKIKKS	EGQIHNWFVNKRRKIKKS	EKQIMCWFSNKRRKIKKS	EEQISYWFWNKRRKIKKS	ERQIAQWFSNKRRKIKKS	ETQISNWFANKRKKIKKS	EKQIACWFSNKRKKIKKS	EVQIVYWFENKRRKIKKS	ERQISNWFSNKRKKIKKS	ELQIRDWFANKRAKIKKS	ERQIQNWFSNKRRKIKKS	ESQISRWFENKRRKIKKS	EVQISYWFSNKRRKIKKS	ESQIMYWFQNKRRKIKKS	EVQICNWFRNKRRKIKKS	EKQILQWFENKRKKIKKS	ELQIIYWFSNKRRKIKKS	ELQILRWFQNKRWKIKKS	ENQINRWFRNKRFKIKKS	EDQISRWFWNKRYKIKKS	EKQIQEWFKNKRYKIKKS	EGQIRKWFQNKRRKIKKS	EVQILLWFKNKRYKIKKS	EDQICWWFSNKRGKIKKS	EGQIVDWFRNKRYKIKKS	EKQIMKWFDNKRVKIKKS	ELQIGKWFNNKRQKIKKS	EGQILKWFENKRRKIKKS	EAQILKWFNNKRFKIKKS	EQQIARWFQNKRVKIKKS	EGQILRWFANKRHKIKKS	EMQISKWFENKRYKIKKS	EKQIARWFANKRYKIKKS	ERQISLWFRNKRAKIKKS	EGQIRIWFSNKRAKIKKS
>115.303.AAA	>115.149.AAC	>115.352.AAG	>115.304.AAT	>115.316.ACA	>115.338.ACC	>115.205.ACG	>115.264.ACT	>115.274.AGA	>115.355.AGC	>115.333.AGG	>115.328.AGT	>115.306.ATA	>115.120.ATC	>115.305.ATG	>115.188.ATT	>115.121.CAA	>115.90.CAC	>115.549.CAG	>115.137.CAT	>115.225.CCA	>115.463.CCC	>115.370.CCG	>115.249.CCT	>115.412.CGA	>115.398.CGC	>115.142.CGG	>115.446.CGT	>115.368.CTA	>115.88.CTC	>115.34.CTG	>115.195.CTT	>115.88.GAA	>115.25.GAC	>115.108.GAG	>115.36.GAT	>115.51.GCA	>115.27.GCC	>115.42.GCG	>115.38.GCT	>115.126.GGA	>115.50.GGC	>115.206.GGG	>115.116.GGT	>115.67.GTA	>115.61.GTC	>115.86.GTG	>115.124.GTT	>115.138.TAA	>115.112.TAC
EKQIAGWFANKRFKIKKS	ERQINSWFRNKRFKIKKS	ERQISQWFWNKRWKIKKS	ERQISAWFSNKRHKIKKS	ERQIVNWFNNKRRKIKKS	EQQIKNWFENKRKKIKKS	ETQIIHWFENKRRKIKKS	ERQIAGWFHNKRMKIKKS	EVQIRAWFKNKRYKIKKS	ESQIARWFNNKRVKIKKS	ERQISTWFWNKRIKIKKS	EAQIKKWFENKRWKIKKS	EKQIGMWFANKRQKIKKS	ETQINLWFCNKRLKIKKS	EMQIVYWFQNKRTKIKKS	ERQIHVWFQNKRAKIKKS	EAQIMMWFANKRRKIKKS	EPQIAMWFRNKRRKIKKS	ENQIRWWFWNKRRKIKKS	ELQILNWFSNKRRKIKKS	ERQISDWFANKRKKIKKS	ERQISNWFSNKRKKIKKS	EQQILDWFSNKRKKIKKS	ERQISDWFGNKRKKIKKS	EVQISYWFANKRMKIKKS	EMQIRMWFSNKRVKIKKS	EKQIIVWFHNKRFKIKKS	ERQIKDWFSNKRRKIKKS	ENQIAFWFSNKRRKIKKS	EVQIRYWFGNKRKKIKKS	EKQILGWFQNKRRKIKKS	EQQITFWFSNKRRKIKKS	EHQIDRWFQNKRYKIKKS	ERQIERWFRNKRWKIKKS	EGQIMQWFWNKRYKIKKS	EGQIAKWFVNKRFKIKKS	EPQITKWFQNKRRKIKKS	EVQIRLWFKNKRFKIKKS	EHQINDWFRNKRFKIKKS	ERQITNWFRNKRYKIKKS	EKQIDKWFDNKRQKIKKS	EVQIKKWFNNKRQKIKKS	EYQILKWFENKRAKIKKS	ELQISKWFDNKRTKIKKS	EAQIGRWFQNKRLKIKKS	EAQIAKWFRNKRAKIKKS	ELQITRWFENKRYKIKKS	EKQIVRWFGNKRAKIKKS	ERQILLWFQNKRAKIKKS	EEQIRVWFSNKRVKIKKS
>116.302.AAA	>116.149.AAC	>116.351.AAG	>116.303.AAT	>116.315.ACA	>116.332.ACC	>116.203.ACG	>116.260.ACT	>116.272.AGA	>116.345.AGC	>116.331.AGG	>116.324.AGT	>116.306.ATA	>116.119.ATC	>116.303.ATG	>116.186.ATT	>116.121.CAA	>116.89.CAC	>116.547.CAG	>116.137.CAT	>116.225.CCA	>116.463.CCC	>116.356.CCG	>116.248.CCT	>116.409.CGA	>116.396.CGC	>116.140.CGG	>116.443.CGT	>116.363.CTA	>116.87.CTC	>116.33.CTG	>116.195.CTT	>116.88.GAA	>116.25.GAC	>116.108.GAG	>116.36.GAT	>116.51.GCA	>116.27.GCC	>116.42.GCG	>116.38.GCT	>116.125.GGA	>116.46.GGC	>116.204.GGG	>116.115.GGT	>116.67.GTA	>116.60.GTC	>116.84.GTG	>116.123.GTT	>116.138.TAA	>116.111.TAC
ERQIHYWFVNKRAKIKKS	ESQISSWFRNKRFKIKKS	ERQIMQWFWNKRSKIKKS	ERQIMVWFNNKRWKIKKS	ENQIKNWFNNKRRKIKKS	EKQISAWFHNKRTKIKKS	EKQITYWFDNKRRKIKKS	ERQIKHWFENKRRKIKKS	ESQIFRWFANKRFKIKKS	EWQIRSWFKNKRFKIKKS	ETQISKWFENKRRKIKKS	ESQIRKWFENKRWKIKKS	ELQIYYWFVNKRNKIKKS	EMQIVNWFRNKRGKIKKS	ERQISFWFQNKRHKIKKS	ERQIAVWFQNKRAKIKKS	EVQIFYWFANKRRKIKKS	EKQIAMWFSNKRRKIKKS	ERQISHWFWNKRAKIKKS	ERQISDWFTNKRRKIKKS	EKQINTWFQNKRKKIKKS	EGQIMNWFSNKRKKIKKS	ESQIINWFSNKRKKIKKS	ERQIADWFSNKRKKIKKS	EVQIRRWFENKRRKIKKS	ERQISMWFNNKRAKIKKS	ERQIVHWFENKRRKIKKS	EVQIINWFSNKRRKIKKS	ERQISHWFANKRKKIKKS	EVQITWWFSNKRKKIKKS	ELQIVYWFENKRRKIKKS	EQQITNWFGNKRSKIKKS	ESQIVRWFQNKRWKIKKS	EVQIVRWFRNKRWKIKKS	ETQIMRWFWNKRWKIKKS	ENQIVMWFRNKRYKIKKS	EKQIIRWFQNKRQKIKKS	ERQIVVWFKNKRFKIKKS	ERQIMDWFRNKRFKIKKS	ERQIMDWFRNKRFKIKKS	EGQITKWFDNKRQKIKKS	ESQILKWFNNKRLKIKKS	EKQIQKWFENKRRKIKKS	EKQISKWFDNKRFKIKKS	EHQIFRWFQNKRYKIKKS	EYQITRWFANKRSKIKKS	ENQIRRWFENKRFKIKKS	EGQILKWFANKRHKIKKS	EQQISNWFSNKRAKIKKS	EYQIRIWFSNKRAKIKKS
>117.301.AAA	>117.148.AAC	>117.351.AAG	>117.301.AAT	>117.312.ACA	>117.332.ACC	>117.199.ACG	>117.259.ACT	>117.269.AGA	>117.339.AGC	>117.331.AGG	>117.320.AGT	>117.304.ATA	>117.113.ATC	>117.300.ATG	>117.185.ATT	>117.120.CAA	>117.89.CAC	>117.547.CAG	>117.136.CAT	>117.224.CCA	>117.461.CCC	>117.356.CCG	>117.248.CCT	>117.406.CGA	>117.393.CGC	>117.137.CGG	>117.435.CGT	>117.362.CTA	>117.84.CTC	>117.33.CTG	>117.191.CTT	>117.87.GAA	>117.24.GAC	>117.106.GAG	>117.35.GAT	>117.51.GCA	>117.26.GCC	>117.41.GCG	>117.38.GCT	>117.124.GGA	>117.45.GGC	>117.203.GGG	>117.115.GGT	>117.67.GTA	>117.58.GTC	>117.84.GTG	>117.123.GTT	>117.138.TAA	>117.111.TAC
ERQISSWFSNKRHKIKKS	ERQIGTWFRNKRFKIKKS	ELQIMQWFWNKRHKIKKS	EGQIGQWFANKRFKIKKS	EGQITSWFHNKRTKIKKS	EAQIRAWFKNKRYKIKKS	ESQISAWFSNKRNKIKKS	EYQIVAWFKNKRYKIKKS	ESQIFRWFANKRQKIKKS	ERQIQMWFSNKRVKIKKS	EKQICKWFENKRRKIKKS	ERQIRKWFENKRFKIKKS	ETQIVYWFANKRTKIKKS	ERQILTWFQNKRTKIKKS	ELQIMYWFQNKRHKIKKS	EKQIKIWFQNKRSKIKKS	ETQIFNWFANKRRKIKKS	ELQIMMWFSNKRRKIKKS	ERQISHWFWNKRRKIKKS	EVQISTWFSNKRRKIKKS	EVQIMNWFCNKRKKIKKS	EDQIMNWFSNKRKKIKKS	ERQIGYWFENKRKKIKKS	EIQIVNWFANKRKKIKKS	ERQIMMWFQNKRAKIKKS	EVQIVYWFSNKRRKIKKS	ESQISRWFENKRRKIKKS	ELQITNWFSNKRRKIKKS	EQQIFHWFANKRKKIKKS	ESQIAYWFSNKRRKIKKS	ERQIRYWFENKRRKIKKS	EHQIMYWFGNKRAKIKKS	EPQILRWFQNKRWKIKKS	EQQITRWFRNKRWKIKKS	EHQISVWFWNKRYKIKKS	EKQIARWFLNKRYKIKKS	EHQISRWFQNKRRKIKKS	ERQIMLWFKNKRYKIKKS	EAQILDWFRNKRFKIKKS	ESQICDWFRNKRYKIKKS	EGQIAKWFDNKRQKIKKS	EKQICKWFNNKRMKIKKS	EKQILKWFENKRRKIKKS	ESQISKWFDNKRFKIKKS	EYQICKWFQNKRSKIKKS	EKQIQKWFRNKRFKIKKS	EGQIGRWFENKRWKIKKS	ETQIERWFANKRYKIKKS	ERQIVIWFSNKRAKIKKS	EGQIRIWFSNKRAKIKKS
>118.299.AAA	>118.148.AAC	>118.342.AAG	>118.300.AAT	>118.309.ACA	>118.328.ACC	>118.197.ACG	>118.259.ACT	>118.268.AGA	>118.337.AGC	>118.330.AGG	>118.319.AGT	>118.301.ATA	>118.112.ATC	>118.299.ATG	>118.185.ATT	>118.120.CAA	>118.89.CAC	>118.546.CAG	>118.136.CAT	>118.224.CCA	>118.460.CCC	>118.355.CCG	>118.247.CCT	>118.406.CGA	>118.389.CGC	>118.136.CGG	>118.430.CGT	>118.348.CTA	>118.84.CTC	>118.33.CTG	>118.190.CTT	>118.87.GAA	>118.24.GAC	>118.106.GAG	>118.35.GAT	>118.51.GCA	>118.26.GCC	>118.41.GCG	>118.38.GCT	>118.124.GGA	>118.45.GGC	>118.200.GGG	>118.114.GGT	>118.67.GTA	>118.58.GTC	>118.83.GTG	>118.123.GTT	>118.138.TAA	>118.110.TAC
EPQIASWFANKRFKIKKS	ELQIAQWFRNKRFKIKKS	ERQIMQWFWNKRSKIKKS	ETQIKYWFVNKRNKIKKS	EMQISNWFNNKRRKIKKS	ERQIATWFANKRKKIKKS	ERQIKHWFENKRRKIKKS	ERQIKMWFENKRKKIKKS	ELQIFRWFANKRHKIKKS	ERQITRWFNNKRVKIKKS	EVQISKWFENKRRKIKKS	ETQITRWFNNKRNKIKKS	ESQIRWWFNNKRAKIKKS	ERQIYFWFRNKRIKIKKS	ELQIVYWFQNKRAKIKKS	ERQILVWFQNKRSKIKKS	EVQIANWFGNKRRKIKKS	ELQIAYWFSNKRRKIKKS	EMQIQSWFQNKRRKIKKS	ERQISNWFSNKRRKIKKS	ECQIANWFANKRKKIKKS	EMQIVNWFSNKRKKIKKS	EVQILNWFQNTRKKIKKS	ERQISDWFANKRKKIKKS	EKQISYWFANKRVKIKKS	ELQIMHWFSNKRRKIKKS	ESQIAHWFENKRRKIKKS	ETQIKDWFSNKRRKIKKS	EAQINCWFANKRKKIKKS	ELQIVNWFKNKRKKIKKS	EKQITDWFQNKRKKIKKS	ELQIMNWFSNKRKKIKKS	EKQIMKWFFNKRYKIKKS	EGQIERWFRNKRWKIKKS	ERQIQVWFWNKRYKIKKS	EMQILSWFRNKRYKIKKS	EAQITRWFQNKRAKIKKS	EKQICRWFKNKRFKIKKS	ESQIVDWFRNKRYKIKKS	ERQITVWFKNKRWKIKKS	EHQISKWFDNKRAKIKKS	EEQIRKWFDNKRQKIKKS	ESQILKWFENKRSKIKKS	ERQIAKWFDNKRFKIKKS	EHQISKWFQNKRSKIKKS	EPQITKWFANKRCKIKKS	EMQIAVWFQNKRYKIKKS	ERQIRIWFANKRFKIKKS	EKQIMIWFCNKRAKIKKS	ESQIRVWFSNKRAKIKKS
>119.292.AAA	>119.148.AAC	>119.338.AAG	>119.300.AAT	>119.308.ACA	>119.328.ACC	>119.196.ACG	>119.255.ACT	>119.267.AGA	>119.336.AGC	>119.330.AGG	>119.318.AGT	>119.301.ATA	>119.111.ATC	>119.296.ATG	>119.184.ATT	>119.119.CAA	>119.89.CAC	>119.546.CAG	>119.136.CAT	>119.224.CCA	>119.458.CCC	>119.353.CCG	>119.242.CCT	>119.406.CGA	>119.386.CGC	>119.136.CGG	>119.429.CGT	>119.348.CTA	>119.82.CTC	>119.33.CTG	>119.188.CTT	>119.86.GAA	>119.24.GAC	>119.105.GAG	>119.35.GAT	>119.50.GCA	>119.26.GCC	>119.41.GCG	>119.38.GCT	>119.122.GGA	>119.45.GGC	>119.199.GGG	>119.114.GGT	>119.67.GTA	>119.58.GTC	>119.80.GTG	>119.123.GTT	>119.132.TAA	>119.110.TAC
EKQITYWFVNKRFKIKKS	ERQILSWFRNKRFKIKKS	ERQILQWFWNKRFKIKKS	EKQISAWFSNKRFKIKKS	ERQIRNWFENKRRKIKKS	ERQITNWFENKRKKIKKS	EYQIQRWFKNKRYKIKKS	ERQIKDWFQNKRKKIKKS	EKQIHYWFANKRWKIKKS	EKQIGRWFNNKRVKIKKS	EVQIAKWFENKRAKIKKS	EQQIRRWFENKRYKIKKS	ERQINAWFNNKRSKIKKS	EVQIASWFRNKRSKIKKS	EVQIVYWFQNKRVKIKKS	ERQIVVWFQNKRSKIKKS	EGQIHNWFANKRRKIKKS	ESQISMWFRNKRRKIKKS	EAQISWWFWNKRRKIKKS	ELQICNWFSNKRRKIKKS	EAQITNWFGNKRKKIKKS	ESQIMNWFSNKRKKIKKS	EKQIINWFHNKRKKIKKS	ERQIANWFSNKRKKIKKS	ERQIMFWFQNKRSKIKKS	EVQIGYWFSNKRRKIKKS	EEQISHWFENKRRKIKKS	EVQISQWFNNKRRKIKKS	EVQIMWWFGNKRKKIKKS	ERQISYWFGNKRKKIKKS	ERQIRYWFENKRKKIKKS	EKQITYWFGNKRKKIKKS	ESQIARWFQNKRWKIKKS	ESQITRWFRNKRWKIKKS	ERQIMAWFWNKRYKIKKS	EKQITVWFRNKRYKIKKS	EKQIMKWFQNKRLKIKKS	ERQITLWFKNKRFKIKKS	ELQITDWFRNKRYKIKKS	EKQITDWFRNKRFKIKKS	ERQIVKWFDNKRQKIKKS	EKQIVKWFSNKREKIKKS	EKQILKWFENKRGKIKKS	ERQICKWFDNKRYKIKKS	ETQIFNWFRNKRCKIKKS	EYQIRRWFSNKRMKIKKS	EWQIGKWFENKRYKIKKS	ERQIRVWFANKRFKIKKS	ERQIAIWFVNKRVKIKKS	EYQIRIWFSNKRHKIKKS
>120.290.AAA	>120.147.AAC	>120.338.AAG	>120.295.AAT	>120.308.ACA	>120.320.ACC	>120.196.ACG	>120.248.ACT	>120.266.AGA	>120.332.AGC	>120.329.AGG	>120.318.AGT	>120.301.ATA	>120.98.ATC	>120.295.ATG	>120.183.ATT	>120.119.CAA	>120.88.CAC	>120.543.CAG	>120.136.CAT	>120.223.CCA	>120.450.CCC	>120.352.CCG	>120.237.CCT	>120.405.CGA	>120.385.CGC	>120.131.CGG	>120.422.CGT	>120.348.CTA	>120.81.CTC	>120.32.CTG	>120.185.CTT	>120.86.GAA	>120.24.GAC	>120.105.GAG	>120.35.GAT	>120.50.GCA	>120.25.GCC	>120.41.GCG	>120.37.GCT	>120.122.GGA	>120.44.GGC	>120.198.GGG	>120.114.GGT	>120.67.GTA	>120.56.GTC	>120.76.GTG	>120.122.GTT	>120.132.TAA	>120.110.TAC
ESQIACWFANKRFKIKKS	EMQIGGWFRNKRHKIKKS	EKQIKQWFWNKRWKIKKS	SRRSGVWFRNKRYKIKKS	ERQIVNWFLNKRRKIKKS	EKQIVTWFSNKRKKIKKS	ERQITGWFQNKRNKIKKS	EWQIFAWFKNKRYKIKKS	EKQIFRWFANKRHKIKKS	EKQIRYWFSNKRVKIKKS	ERQIRKWFENKRRKIKKS	RGKID_WFLNKRQKIKKS	ERQIMQWFANKRTKIKKS	ESQIASWFTNKRPKIKKS	AI_PSGDASS_AAKIKKS	EQQIRIWFQNKRAKIKKS	EQQIANWFSNKRRKIKKS	ELQIAYWFSNKRRKIKKS	ESQINYWFWNKRRKIKKS	ELQIMSWFSNKRRKIKKS	EKQIMDWFANKRKKIKKS	ETQIANWFHNKRKKIKKS	ERQIVDWFHNKRKKIKKS	EKQIRDWFHNKRKKIKKS	ERQIFYWFANKRAKIKKS	ELQIIYWFSNKRRKIKKS	EKQITMWFENKRRKIKKS	ERQICMWFSNKRAKIKKS	EAQIFHWFANKRKKIKKS	EVQIRYWFSNKRKKIKKS	EMQIQYWFGNKRKKIKKS	EWQIMYWFGNKRAKIKKS	ESQILRWFQNKRWKIKKS	EGQIERWFRNKRWKIKKS	EQQITRWFMNKRYKIKKS	EGQIEKWFINKRYKIKKS	EVQILRWFQNKRRKIKKS	EMQIRIWFKNKRFKIKKS	EAQILDWFRNKRYKIKKS	EGQIMDWFRNKRYKIKKS	EWQIGKWFDNKRYKIKKS	EGQISKWFNNKRMKIKKS	EGQILKWFENKRRKIKKS	ERQINKWFDNKRQKIKKS	EKQITRWFGNKRFKIKKS	EYQIRRWFGNKRLKIKKS	EAQIGRWFENKRYKIKKS	EWQITRWFANKRWKIKKS	EAQITIWFANKRAKIKKS	EAQIRIWFSNKRVKIKKS
>121.290.AAA	>121.147.AAC	>121.338.AAG	>121.295.AAT	>121.306.ACA	>121.316.ACC	>121.188.ACG	>121.247.ACT	>121.266.AGA	>121.331.AGC	>121.328.AGG	>121.316.AGT	>121.301.ATA	>121.96.ATC	>121.294.ATG	>121.183.ATT	>121.119.CAA	>121.88.CAC	>121.537.CAG	>121.136.CAT	>121.223.CCA	>121.450.CCC	>121.350.CCG	>121.234.CCT	>121.405.CGA	>121.379.CGC	>121.119.CGG	>121.421.CGT	>121.347.CTA	>121.81.CTC	>121.31.CTG	>121.185.CTT	>121.86.GAA	>121.24.GAC	>121.105.GAG	>121.35.GAT	>121.50.GCA	>121.24.GCC	>121.40.GCG	>121.37.GCT	>121.121.GGA	>121.43.GGC	>121.196.GGG	>121.112.GGT	>121.66.GTA	>121.56.GTC	>121.75.GTG	>121.121.GTT	>121.127.TAA	>121.110.TAC
ESQISSWFSNKRHKIKKS	EKQIGGWFRNKRFKIKKS	ERQILQWFWNKRYKIKKS	EKQIASWFSNKRFKIKKS	ELQIRNWFNNKRRKIKKS	ESQISWWFHNKRIKIKKS	LNELQTWFLNKRAKIKKS	ERQINAWFHNKRSKIKKS	ERQIRRWFENKRYKIKKS	EKQIIPWFGNKRDKIKKS	EVQIAKWFENKRYKIKKS	EAQIKKWFENKRHKIKKS	ERQIVTWFNNKRAKIKKS	ETQIRMWFANKRFKIKKS	EMQIVYWFQNKRVKIKKS	ERQIRVWFQNKRSKIKKS	EVQIAGWFANKRRKIKKS	ELQIAMWFRNKRRKIKKS	EQQISHWFWNKRRKIKKS	ECQILNWFSNKRRKIKKS	EHQIATWFANKRKKIKKS	EIQILNWFSNKRKKIKKS	EKQIMMWFENKRKKIKKS	ERQIADWFSNKRKKIKKS	EMQIHHWFANKRRKIKKS	ERQILMWFSNKRRKIKKS	ERQIGLWFENKRRKIKKS	EKQIGAWFNNKRRKIKKS	EFQIMFWFSNKRKKIKKS	ERQISNWFSNKRKKIKKS	ESQIRDWFQNKRKKIKKS	ERQISYWFGNKRSKIKKS	ESQISRWFQNKRWKIKKS	EAQIVRWFRNKRWKIKKS	ENQIMRWFWNKRYKIKKS	EKQIAVWFRNKRWKIKKS	EPQIRRWFQNKRFKIKKS	EVQIRLWFKNKRYKIKKS	EKQISDWFRNKRAKIKKS	ERQIVDWFRNKRRKIKKS	EGQIIKWFDNKRQKIKKS	ERQIGKWFNNKRQKIKKS	EGQICKWFENKRAKIKKS	ERQILKWFSNKRDKIKKS	EVQIGKWFQNKRSKIKKS	EGQILKWFRNKRAKIKKS	EKQINKWFMNKRWKIKKS	ESQITKWFANKRHKIKKS	EHQITLWFNNKRSKIKKS	EQQIRVWFSNKRVKIKKS
>122.289.AAA	>122.146.AAC	>122.336.AAG	>122.292.AAT	>122.305.ACA	>122.315.ACC	>122.183.ACG	>122.244.ACT	>122.265.AGA	>122.329.AGC	>122.322.AGG	>122.315.AGT	>122.298.ATA	>122.96.ATC	>122.293.ATG	>122.182.ATT	>122.118.CAA	>122.87.CAC	>122.526.CAG	>122.135.CAT	>122.222.CCA	>122.443.CCC	>122.347.CCG	>122.234.CCT	>122.403.CGA	>122.372.CGC	>122.119.CGG	>122.413.CGT	>122.345.CTA	>122.78.CTC	>122.31.CTG	>122.184.CTT	>122.86.GAA	>122.24.GAC	>122.104.GAG	>122.35.GAT	>122.50.GCA	>122.24.GCC	>122.40.GCG	>122.37.GCT	>122.119.GGA	>122.43.GGC	>122.192.GGG	>122.112.GGT	>122.66.GTA	>122.56.GTC	>122.75.GTG	>122.121.GTT	>122.125.TAA	>122.110.TAC
ETQIYQWFANKRHKIKKS	ESQIMSWFRNKRFKIKKS	ERQIVQWFWNKRHKIKKS	EMQIMQWFANKRFKIKKS	EMQIMNWFNNKRRKIKKS	EFQISTWFKNKRFKIKKS	EVQIVRWFSNKRTKIKKS	EAQIKSWFHNKRVKIKKS	EEQIRRWFQNKRWKIKKS	EVQIMRWFSNKRVKIKKS	EDQISKWFENKRYKIKKS	ENQIKKWFENKRYKIKKS	EWQIYAWFKNKRYKIKKS	ELQIHNWFHNKRLKIKKS	ERQIYYWFQNKRAKIKKS	ERQIYVWFQNKRQKIKKS	ESQITQWFQNKRRKIKKS	EVQIGMWFRNKRRKIKKS	ERQIKHWFWNKRRKIKKS	EVQIANWFTNKRRKIKKS	ELQIHNWFANKRKKIKKS	EQQISTWFSNKRKKIKKS	EIQIVYWFENKRRKIKKS	ELQILQWFLNKRTKIKKS	ERQIAHWFGNKRSKIKKS	ERQIRDWFSNKRVKIKKS	EQQISHWFENKRRKIKKS	ELQIINWFSNKRRKIKKS	EKQIFHWFANKRKKIKKS	ELQIRYWFANKRKKIKKS	EKQITNWFQNKRKKIKKS	EVQICNWFANKRKKIKKS	EVQIGRWFQNKRWKIKKS	ENQINRWFRNKRFKIKKS	ERQIQTWFWNKRYKIKKS	EKQILRWFLNKRYKIKKS	EVQIFHWFRNKRFKIKKS	EVQIYYWFKNKRYKIKKS	ERQIIDWFRNKRYKIKKS	ERQIMIWFKNKRWKIKKS	ERQIMKWFDNKRVKIKKS	EEQIIKWFNNKRFKIKKS	ETQIRKWFENKRAKIKKS	EKQISKWFDNKRQKIKKS	EVQIGKWFQNKRLKIKKS	EVQIVRWFSNKRFKIKKS	ERQITRWFENKRAKIKKS	EGQINIWFRNKRYKIKKS	ERQISTWFVNKRSKIKKS	EGQIRVWFSNKRAKIKKS
>123.286.AAA	>123.146.AAC	>123.335.AAG	>123.290.AAT	>123.303.ACA	>123.308.ACC	>123.183.ACG	>123.241.ACT	>123.265.AGA	>123.325.AGC	>123.320.AGG	>123.312.AGT	>123.298.ATA	>123.94.ATC	>123.292.ATG	>123.180.ATT	>123.118.CAA	>123.87.CAC	>123.525.CAG	>123.134.CAT	>123.219.CCA	>123.443.CCC	>123.346.CCG	>123.231.CCT	>123.402.CGA	>123.369.CGC	>123.113.CGG	>123.408.CGT	>123.342.CTA	>123.76.CTC	>123.30.CTG	>123.181.CTT	>123.85.GAA	>123.24.GAC	>123.104.GAG	>123.35.GAT	>123.50.GCA	>123.24.GCC	>123.40.GCG	>123.37.GCT	>123.118.GGA	>123.43.GGC	>123.191.GGG	>123.111.GGT	>123.66.GTA	>123.56.GTC	>123.75.GTG	>123.121.GTT	>123.123.TAA	>123.110.TAC
EKQIYFWFVNKRHKIKKS	ELQISSWFRNKRFKIKKS	EQQIRQWFWNKRHKIKKS	ERQISMWFNNKRFKIKKS	ERQILNWFNNKRRKIKKS	ENQIACWFHNKRVKIKKS	EKQIKHWFENKRRKIKKS	ELQIKNWFQNKRKKIKKS	EKQIIYWFNNKRFKIKKS	EKQISMWFSNKRTKIKKS	EQQIGKWFDNKRQKIKKS	ERQITKWFENKRWKIKKS	ERQIASWFSNKRAKIKKS	EVQIRMWFANKRYKIKKS	ESQIVSWFQNKRTKIKKS	RVADHHLVRQQRRKIKKS	EDQIHNWFSNKRRKIKKS	ESQISMWFRNKRRKIKKS	E_QIPSWFPNKRLKIKKS	EGQITNWFGNKRRKIKKS	ERQIMLWFQNKRKKIKKS	ERQILDWFSNKRKKIKKS	ETQISNWFWNKRKKIKKS	EKQIIDWFSNKRKKIKKS	EVQIFYWFANKRSKIKKS	ESQISMWFNNKRRKIKKS	EDQITHWFENKRRKIKKS	EVQIVNWFSNKRRKIKKS	ESQIGYWFSNKRRKIKKS	ESQIRYWFGNKRKKIKKS	ETQITNWFENKRRKIKKS	ETQIGCWFSNKRRKIKKS	ESQIARWFQNKRWKIKKS	EVQIARWFRNKRFKIKKS	ETQISRWFWNKRWKIKKS	EVQILHWFRNKRYKIKKS	EGQIHNWFRNKRQKIKKS	EGQIRMWFKNKRYKIKKS	ERQIADWFRNKRAKIKKS	EAQIRDWFRNKRYKIKKS	ERQISKWFDNKRLKIKKS	EKQITKWFNNKRSKIKKS	ERQIVKWFENKRRKIKKS	EYQITKWFNNKRNKIKKS	EAQIMKWFQNKRVKIKKS	ELQILKWFRNKRWKIKKS	EVQIGKWFENKRWKIKKS	EQQIARWFGNKRWKIKKS	EKQISTWFVNKRVKIKKS	ESQIRIWFSNKRVKIKKS
>124.281.AAA	>124.146.AAC	>124.328.AAG	>124.289.AAT	>124.302.ACA	>124.303.ACC	>124.182.ACG	>124.237.ACT	>124.264.AGA	>124.324.AGC	>124.317.AGG	>124.311.AGT	>124.296.ATA	>124.92.ATC	>124.290.ATG	>124.179.ATT	>124.117.CAA	>124.86.CAC	>124.523.CAG	>124.134.CAT	>124.218.CCA	>124.439.CCC	>124.344.CCG	>124.230.CCT	>124.399.CGA	>124.361.CGC	>124.112.CGG	>124.401.CGT	>124.341.CTA	>124.75.CTC	>124.30.CTG	>124.181.CTT	>124.85.GAA	>124.24.GAC	>124.104.GAG	>124.35.GAT	>124.49.GCA	>124.24.GCC	>124.40.GCG	>124.37.GCT	>124.117.GGA	>124.42.GGC	>124.190.GGG	>124.110.GGT	>124.66.GTA	>124.55.GTC	>124.72.GTG	>124.119.GTT	>124.122.TAA	>124.108.TAC
ESQITSWFANKRWKIKKS	ERQIATWFRNKRHKIKKS	ERQISQWFWNKRHKIKKS	EKQIVSWFSNKRCKIKKS	EVQIINWFNNKRSKIKKS	EKQITSWFHNKRMKIKKS	ERQIRYWFDNKRRKIKKS	ESQIGVWFYNKRAKIKKS	EVQIFRWFANKRAKIKKS	ERQILRWFSNKRVKIKKS	EKQIKKWFENKRSKIKKS	ERQIKKWFENKRGKIKKS	EKQILRWFANKRAKIKKS	ESQIRWWFNNKRVKIKKS	EKQIVYWFQNKRHKIKKS	ERQIQVWFWNKRAKIKKS	EAQIMCWFANKRRKIKKS	ERQIAMWFSNKRRKIKKS	ESQISCWFWNKRRKIKKS	EMQIQQWFSNKRRKIKKS	EAQIHNWFCNKRKKIKKS	EGQIANWFSNKRKKIKKS	EKQIRHWFENKRKKIKKS	EVQIANWFGNKRKKIKKS	EKQIHNWFANKRGKIKKS	ERQIGCWFNNKRKKIKKS	EDQISHWFENKRRKIKKS	ETQITNWFSNKRRKIKKS	ESQIFYWFANKRRKIKKS	ELQIRFWFGNKRKKIKKS	EIQIRYWFSNKRKKIKKS	ESQIVYWFGNKRKKIKKS	EIQIHNWFKNKRWKIKKS	EMQILRWFRNKRFKIKKS	EKQITVWFWNKRYKIKKS	ELQILHWFRNKRYKIKKS	EGQINKWFANKRQKIKKS	EAQIRVWFKNKRYKIKKS	EFQIRTWFKNKRFKIKKS	EHQIINWFRNKRYKIKKS	EDQIHNWFKNKRWKIKKS	EKQILKWFNNKRVKIKKS	EKQISKWFENKRGKIKKS	EVQINKWFNNKRQKIKKS	EVQINRWFQNKRGKIKKS	EMQIMKWFRNKRAKIKKS	EYQITRWFENKRYKIKKS	ESQILRWFANKRFKIKKS	ERQIVTWFSNKRAKIKKS	EEQIRVWFSNKRAKIKKS
>125.281.AAA	>125.145.AAC	>125.326.AAG	>125.288.AAT	>125.301.ACA	>125.302.ACC	>125.178.ACG	>125.233.ACT	>125.263.AGA	>125.324.AGC	>125.312.AGG	>125.309.AGT	>125.296.ATA	>125.90.ATC	>125.290.ATG	>125.177.ATT	>125.117.CAA	>125.86.CAC	>125.522.CAG	>125.133.CAT	>125.218.CCA	>125.436.CCC	>125.343.CCG	>125.226.CCT	>125.396.CGA	>125.358.CGC	>125.110.CGG	>125.401.CGT	>125.339.CTA	>125.75.CTC	>125.30.CTG	>125.179.CTT	>125.84.GAA	>125.24.GAC	>125.103.GAG	>125.34.GAT	>125.49.GCA	>125.24.GCC	>125.40.GCG	>125.36.GCT	>125.116.GGA	>125.41.GGC	>125.189.GGG	>125.109.GGT	>125.66.GTA	>125.54.GTC	>125.71.GTG	>125.118.GTT	>125.121.TAA	>125.107.TAC
ELQIKYWFVNKRYKIKKS	EQQIAQWFRNKRHKIKKS	ERQITQWFWNKRYKIKKS	EKQISSWFTNKRFKIKKS	EAQITVWFQNKRRKIKKS	EQQIRAWFKNKRYKIKKS	ELQIRWWFDNKRRKIKKS	EVQIVRWFENKRLKIKKS	EFQIMQWFKNKRFKIKKS	EVQISRWFNNKRVKIKKS	ESQIAKWFENKRAKIKKS	EMQIRKWFENKRFKIKKS	ENQIRWWFQNKRWKIKKS	EAQIVAWFRNKREKIKKS	ERQIRTWFQNKRDKIKKS	ERQIKVWFQNKRQKIKKS	EEQIANWFANKRRKIKKS	EAQITMWFRNKRRKIKKS	RAPVRGWFNNKREKIKKS	ESQIMHWFSNKRRKIKKS	EVQIANWFSNKRKKIKKS	EVQILNWFSNKRKKIKKS	EVQIIYWFENKRKKIKKS	EMQITNWFGNKRKKIKKS	ERQILFWFQNKRKKIKKS	ESQIRDWFSNKRRKIKKS	ELQIRYWFENKRRKIKKS	EKQIVYWFSNKRSKIKKS	EKQIMMWFQNKRKKIKKS	EVQIVDWFKNKRKKIKKS	EEQIRDWFQNKRNKIKKS	ELQITHWFGNKRNKIKKS	ESQILRWFQNKRWKIKKS	EAQIRRWFRNKRWKIKKS	EVQIVRWFMNKRYKIKKS	EKQIMVWFRNKRWKIKKS	ESQILKWFQNKRRKIKKS	EKQIYTWFKNKRWKIKKS	EKQILDWFRNKRFKIKKS	EKQICDWFRNKRWKIKKS	ERQIAKWFDNKRVKIKKS	ERQIQKWFNNKRWKIKKS	EGQIQKWFENKRRKIKKS	ERQIAKWFDNKRMKIKKS	EWQITRWFENKRFKIKKS	EKQISKWFRNKRCKIKKS	ECQIVRWFENKRYKIKKS	EGQISVWFRNKRYKIKKS	EKQIVLWFRNKRAKIKKS	EEQIRIWFSNKRAKIKKS
>126.281.AAA	>126.145.AAC	>126.325.AAG	>126.286.AAT	>126.301.ACA	>126.298.ACC	>126.177.ACG	>126.228.ACT	>126.263.AGA	>126.323.AGC	>126.310.AGG	>126.307.AGT	>126.296.ATA	>126.87.ATC	>126.285.ATG	>126.177.ATT	>126.116.CAA	>126.86.CAC	>126.521.CAG	>126.133.CAT	>126.217.CCA	>126.435.CCC	>126.339.CCG	>126.225.CCT	>126.388.CGA	>126.354.CGC	>126.110.CGG	>126.399.CGT	>126.336.CTA	>126.75.CTC	>126.30.CTG	>126.177.CTT	>126.84.GAA	>126.24.GAC	>126.103.GAG	>126.34.GAT	>126.48.GCA	>126.24.GCC	>126.40.GCG	>126.36.GCT	>126.116.GGA	>126.40.GGC	>126.188.GGG	>126.109.GGT	>126.66.GTA	>126.53.GTC	>126.71.GTG	>126.117.GTT	>126.121.TAA	>126.107.TAC
ESQILCWFANKRFKIKKS	ELQISSWFRNKRHKIKKS	ERQILQWFWNKRFKIKKS	ELQIRQWFANKRFKIKKS	ESQIHSWFANKRRKIKKS	EWQILTWFKNKRFKIKKS	EKQIVHWFENKRRKIKKS	ELQISSWFLNKRKKIKKS	EVQIFRWFANKRHKIKKS	EKQIIRWFNNKRVKIKKS	EMQIYKWFENKRYKIKKS	ELQISKWFENKRYKIKKS	ESQIRRWFRNKRIKIKKS	ELQILVWFRNKREKIKKS	ELQIRSWFLNKRSKIKKS	ERQICVWFQNKRAKIKKS	ETQIGTWFANKRRKIKKS	ESQIHNWFSNKRRKIKKS	EQQINYWFWNKRRKIKKS	EIQIGNWFSNKRRKIKKS	EKQILHWFQNKRKKIKKS	ESQILNWFSNKRKKIKKS	ETQICNWFQNKRKKIKKS	EAQIANWFANKRKKIKKS	EAQINYWFQNKRAKIKKS	EKQIVCWFSNKRRKIKKS	ERQISHWFENKRRKIKKS	ELQIMYWFSNKRRKIKKS	EVQIAYWFGNKRRKIKKS	ERQIMYWFGNKRKKIKKS	EVQISYWFQNKRRKIKKS	EQQIAWWFGNKRSKIKKS	EEQITRWFQNKRWKIKKS	ERQIERWFRNKRWKIKKS	EMQISRWFWNKRYKIKKS	EGQITMWFRNKRYKIKKS	EGQIMKWFQNKRRKIKKS	EQQIKLWFKNKRYKIKKS	EAQIMDWFRNKRYKIKKS	EIQIALWFKNKRYKIKKS	ERQISKWFDNKRSKIKKS	ENQISKWFNNKRSKIKKS	ESQILKWFENKRMKIKKS	ERQIAKWFDNKRSKIKKS	EQQIIRWFQNKRLKIKKS	EEQIAKWFRNKRWKIKKS	ERQIIKWFMNKRWKIKKS	ERQILRWFANKRFKIKKS	EQQIKVWFWNKRAKIKKS	EKQIRLWFSNKRFKIKKS
>127.280.AAA	>127.145.AAC	>127.321.AAG	>127.279.AAT	>127.298.ACA	>127.296.ACC	>127.176.ACG	>127.221.ACT	>127.262.AGA	>127.319.AGC	>127.308.AGG	>127.305.AGT	>127.295.ATA	>127.87.ATC	>127.284.ATG	>127.176.ATT	>127.115.CAA	>127.86.CAC	>127.521.CAG	>127.133.CAT	>127.216.CCA	>127.434.CCC	>127.337.CCG	>127.224.CCT	>127.387.CGA	>127.350.CGC	>127.102.CGG	>127.398.CGT	>127.335.CTA	>127.73.CTC	>127.30.CTG	>127.175.CTT	>127.84.GAA	>127.24.GAC	>127.103.GAG	>127.34.GAT	>127.48.GCA	>127.23.GCC	>127.40.GCG	>127.36.GCT	>127.114.GGA	>127.39.GGC	>127.186.GGG	>127.107.GGT	>127.65.GTA	>127.52.GTC	>127.70.GTG	>127.117.GTT	>127.119.TAA	>127.107.TAC
EKQISSWFSNKRFKIKKS	ERQIMQWFRNKRFKIKKS	ESQIASWFNNKRHKIKKS	ERQIAQWFANKRVKIKKS	EVQIKYWFHNKRRKIKKS	EKQIQNWFHNKRMKIKKS	ENQIRNWFENKRRKIKKS	EVQIRNWFQNKRRKIKKS	ERQIMRWFSNKRCKIKKS	ERQILRWFSNKRVKIKKS	EKQINKWFDNKRWKIKKS	ERQIKTWFQNKRYKIKKS	EQQIRHWFVNKRKKIKKS	EMQIKNWFGNKRWKIKKS	ELQITFWFWNKRSKIKKS	EKQIRLWFQNKRMKIKKS	EQQITQWFQNKRRKIKKS	EMQIMMWFRNKRRKIKKS	ESQIACWFSNKRRKIKKS	ERQILGWFSNKRRKIKKS	EVQILNWFANKRKKIKKS	ESQIANWFSNKRKKIKKS	EMQISNWFWNKRKKIKKS	ETQISNWFHNKRKKIKKS	ERQIHYWFCNKRMKIKKS	EEQIMYWFSNKRRKIKKS	EPQITRWFENKRRKIKKS	ERQISNWFSNKRRKIKKS	ERQIAYWFSNKRSKIKKS	EVQIRYWFSNKRKKIKKS	ERQILNWFSNKRKKIKKS	ENQIAFWFGNKRKKIKKS	EVQICRWFQNKRWKIKKS	EPQIVRWFRNKRFKIKKS	ERQILQWFWNKRYKIKKS	EVQILSWFRNKRYKIKKS	EAQIVRWFQNKRHKIKKS	EDQIKVWFKNKRFKIKKS	EMQIADWFRNKRYKIKKS	ELQISDWFRNKRYKIKKS	ESQISKWFDNKRQKIKKS	EKQITKWFNNKRTKIKKS	EVQILKWFENKRRKIKKS	EKQITKWFNNKRMKIKKS	ELQILRWFQNKRMKIKKS	ERQIQKWFRNKRWKIKKS	EMQIQVWFQNKRYKIKKS	ETQIRLWFANKRYKIKKS	ERQIITWFANKRAKIKKS	EGQIRIWFSNKRAKIKKS
>128.275.AAA	>128.144.AAC	>128.320.AAG	>128.274.AAT	>128.298.ACA	>128.295.ACC	>128.175.ACG	>128.217.ACT	>128.261.AGA	>128.318.AGC	>128.308.AGG	>128.305.AGT	>128.295.ATA	>128.86.ATC	>128.281.ATG	>128.176.ATT	>128.115.CAA	>128.86.CAC	>128.520.CAG	>128.133.CAT	>128.213.CCA	>128.433.CCC	>128.331.CCG	>128.223.CCT	>128.387.CGA	>128.347.CGC	>128.101.CGG	>128.390.CGT	>128.334.CTA	>128.72.CTC	>128.29.CTG	>128.174.CTT	>128.84.GAA	>128.24.GAC	>128.101.GAG	>128.34.GAT	>128.48.GCA	>128.23.GCC	>128.40.GCG	>128.36.GCT	>128.113.GGA	>128.39.GGC	>128.184.GGG	>128.106.GGT	>128.65.GTA	>128.51.GTC	>128.69.GTG	>128.117.GTT	>128.119.TAA	>128.107.TAC
ETQILCWFANKRHKIKKS	EGQIGQWFRNKRHKIKKS	EQQIRQWFWNKRFKIKKS	ERQISTWFTNKRFKIKKS	EVQIYNWFNNKRRKIKKS	EKQILSWFHNKRTKIKKS	ERQIKWWFENKRRKIKKS	EVQIRYWFANKQKKIKKS	EKQIISWFNNKRYKIKKS	EKQITRWFNNKRVKIKKS	EQQILKWFENKRFKIKKS	EYQILRWFENKRYKIKKS	EKQILQWFANKRHKIKKS	EWQIRFWFDNKRSKIKKS	ERQITFWFQNKRTKIKKS	EKQIGVWFQNKRAKIKKS	ELQIHYWFSNKRRKIKKS	EPQIAYWFSNKRRKIKKS	EQQIMDWFTNKRRKIKKS	EPQIMNWFSNKRRKIKKS	ERQIHYWFANKRKKIKKS	EGQIMTWFSNKRKKIKKS	EIQILNWFQNKRKKIKKS	ETQITNWFSNKRKKIKKS	EVQIFNWFANKRRKIKKS	ERQIRDWFSNKRMKIKKS	EKQISHWFENKRRKIKKS	ELQITNWFSNKRRKIKKS	EVQIYYWFANKRKKIKKS	EMQIQYWFSNKRKKIKKS	ETQIINWFQNKRKKIKKS	ELQINNWFSNKRKKIKKS	EQQISRWFQNKRWKIKKS	EIQITRWFRNKRFKIKKS	EKQIAVWFWNKRYKIKKS	ELQISHWFRNKRYKIKKS	EAQIHNWFRNKRSKIKKS	EWQIVGWFKNKRFKIKKS	ELQITDWFRNKRYKIKKS	EAQIRGWFKNKRYKIKKS	EKQIMKWFDNKRCKIKKS	E_QIREWFPNKRLKIKKS	ERQIGKWFENKRGKIKKS	EKQIEKWFNNKRWKIKKS	EVQILRWFQNKRDKIKKS	EMQIGKWFRNKRAKIKKS	EEQISKWFMNKRWKIKKS	ELQITRWFANKRYKIKKS	ERQIRVWFCNKRAKIKKS	ETQIRVWFSNKRVKIKKS
>129.274.AAA	>129.143.AAC	>129.318.AAG	>129.272.AAT	>129.296.ACA	>129.294.ACC	>129.175.ACG	>129.214.ACT	>129.260.AGA	>129.310.AGC	>129.308.AGG	>129.304.AGT	>129.291.ATA	>129.85.ATC	>129.280.ATG	>129.174.ATT	>129.115.CAA	>129.85.CAC	>129.520.CAG	>129.133.CAT	>129.211.CCA	>129.432.CCC	>129.328.CCG	>129.220.CCT	>129.386.CGA	>129.339.CGC	>129.99.CGG	>129.385.CGT	>129.332.CTA	>129.71.CTC	>129.29.CTG	>129.173.CTT	>129.84.GAA	>129.24.GAC	>129.101.GAG	>129.34.GAT	>129.47.GCA	>129.23.GCC	>129.40.GCG	>129.35.GCT	>129.113.GGA	>129.38.GGC	>129.184.GGG	>129.106.GGT	>129.64.GTA	>129.51.GTC	>129.66.GTG	>129.116.GTT	>129.116.TAA	>129.107.TAC
EKQIMAWFANKRFKIKKS	EVQIAQWFRNKRFKIKKS	EHQITQWFWNKRYKIKKS	EGQIRCWFSNKRFKIKKS	ERQIRNWFNNKRRKIKKS	EEQIRVWFANKRLKIKKS	ERQIGYWFENKRRKIKKS	EKQITNWFHNKRVKIKKS	ESQIFRWFANKRWKIKKS	EGQIRSWFSNKRVKIKKS	ERQIYKWFENKRRKIKKS	EEQIAKWFENKRYKIKKS	EKQIQYWFANKRVKIKKS	EWQIYRWFKNKRYKIKKS	EKQIRFWFQNKRTKIKKS	EQQIRVWFQNKRSKIKKS	EMQIAWWFSNKRRKIKKS	ESQIRMWFSNKRRKIKKS	EQQISYWFWNKRRKIKKS	ERQITDWFSNKRRKIKKS	ETQIMNWFANKRKKIKKS	ELQIVTWFSNKRKKIKKS	ERQITDWFQNKRKKIKKS	ERQIQDWFGNKRKKIKKS	EPQIFNWFANKRRKIKKS	EAQIRDWFSNKRRKIKKS	EQQIAHWFENKRRKIKKS	ERQIVYWFSNKRAKIKKS	ERQIMFWFQNKRKKIKKS	EKQIENWFKNKRKKIKKS	EAQIMFWFQNKRKKIKKS	EHQIAWWFGNKRKKIKKS	EGQIMRWFQNKRWKIKKS	ERQIERWFRNKRWKIKKS	EKQIGRWFWNKRYKIKKS	EQQIMVWFRNKRWKIKKS	EVQIMRWFQNKRAKIKKS	EKQIKLWFKNKRWKIKKS	EQQILDWFRNKRFKIKKS	EQQIMHWFRNKRFKIKKS	EAQIFRWFANKRWKIKKS	EVQITKWFNNKRQKIKKS	EVQILKWFENKRRKIKKS	ERQIVKWFDNKRYKIKKS	EMQIVRWFQNKRCKIKKS	EVQIRRWFANKRMKIKKS	ETQISRWFENKRYKIKKS	EVQIERWFANKRYKIKKS	ETQIKVWFWNKRAKIKKS	ERQIRLWFSNKRAKIKKS
>130.273.AAA	>130.143.AAC	>130.316.AAG	>130.272.AAT	>130.296.ACA	>130.289.ACC	>130.173.ACG	>130.209.ACT	>130.260.AGA	>130.307.AGC	>130.302.AGG	>130.303.AGT	>130.286.ATA	>130.83.ATC	>130.280.ATG	>130.173.ATT	>130.115.CAA	>130.85.CAC	>130.517.CAG	>130.133.CAT	>130.211.CCA	>130.430.CCC	>130.327.CCG	>130.220.CCT	>130.384.CGA	>130.335.CGC	>130.98.CGG	>130.379.CGT	>130.331.CTA	>130.70.CTC	>130.29.CTG	>130.171.CTT	>130.84.GAA	>130.24.GAC	>130.100.GAG	>130.34.GAT	>130.47.GCA	>130.23.GCC	>130.39.GCG	>130.35.GCT	>130.111.GGA	>130.37.GGC	>130.183.GGG	>130.104.GGT	>130.64.GTA	>130.51.GTC	>130.66.GTG	>130.116.GTT	>130.114.TAA	>130.107.TAC
EAQIHYWFVNKRHKIKKS	ECQINSWFRNKRFKIKKS	EAQIMQWFWNKRYKIKKS	ERQIATWFSNKRFKIKKS	ETQIKYWFWNKRRKIKKS	EKQITSWFHNKRTKIKKS	EFQIRTWFKNKRFKIKKS	ESQIRDWFHNKRTKIKKS	EKQIFRWFANKRAKIKKS	ERQITRWFNNKRVKIKKS	EKQISKWFENKRAKIKKS	ECQIRSWFQNKRYKIKKS	EKQIQTWFQNKRVKIKKS	EWQIYAWFKNKRYKIKKS	EKQIFYWFQNKRHKIKKS	ERQITIWFQNKRAKIKKS	ERQIMMWFQNKRRKIKKS	EMQIAQWFRNKRRKIKKS	EYQIIYWFFNKRAKIKKS	ELQIFNWFNNKRRKIKKS	ENQISNWFSNKRKKIKKS	EKQIVNWFSNKRKKIKKS	ERQILDWFQNKRKKIKKS	ETQISNWFSNKRKKIKKS	ERQITYWFANKRSKIKKS	ERQIVYWFSNKRAKIKKS	ESQIRRWFENKRRKIKKS	EVQITYWFNNKRRKIKKS	ELQIAYWFANKRKKIKKS	ERQIATWFANKRKKIKKS	EKQITGWFQNKRKKIKKS	ESQIIHWFSNKRRKIKKS	EHQIARWFQNKRWKIKKS	EAQICRWFRNKRFKIKKS	ELQIQRWFWNKRWKIKKS	EGQISVWFRNKRWKIKKS	EQQIVKWFQNKRRKIKKS	ERQITLWFKNKRYKIKKS	ERQITDWFRNKRFKIKKS	ESQIMDWFRNKRYKIKKS	EQQIAKWFDNKRFKIKKS	ELQITKWFSNKRYKIKKS	ERQILKWFENKRGKIKKS	EVQISKWFNNKRYKIKKS	ELQIFNWFRNKRLKIKKS	EKQIKKWFRNKRWKIKKS	ESQIAKWFENKRGKIKKS	EGQILKWFANKRAKIKKS	ERQIVVWFVNKRAKIKKS	EAQIRIWFSNKRAKIKKS
>131.273.AAA	>131.142.AAC	>131.313.AAG	>131.271.AAT	>131.292.ACA	>131.287.ACC	>131.171.ACG	>131.208.ACT	>131.259.AGA	>131.305.AGC	>131.301.AGG	>131.298.AGT	>131.286.ATA	>131.80.ATC	>131.279.ATG	>131.172.ATT	>131.114.CAA	>131.84.CAC	>131.514.CAG	>131.133.CAT	>131.210.CCA	>131.429.CCC	>131.325.CCG	>131.206.CCT	>131.378.CGA	>131.331.CGC	>131.97.CGG	>131.370.CGT	>131.330.CTA	>131.69.CTC	>131.29.CTG	>131.171.CTT	>131.83.GAA	>131.24.GAC	>131.100.GAG	>131.34.GAT	>131.45.GCA	>131.23.GCC	>131.39.GCG	>131.35.GCT	>131.110.GGA	>131.37.GGC	>131.182.GGG	>131.103.GGT	>131.64.GTA	>131.51.GTC	>131.65.GTG	>131.116.GTT	>131.114.TAA	>131.107.TAC
ERQIVQWFANKRHKIKKS	EKQIGSWFRNKRHKIKKS	EKQIMQWFWNKRWKIKKS	EKQISNWFSNKRHKIKKS	ESQIVNWFTNKRRKIKKS	ESQITSWFHNKRTKIKKS	EQQIRYWFDNKRRKIKKS	EFQIAAWFKNKRYKIKKS	ERQIKDWFKNKRYKIKKS	ERQISRWFNNKRVKIKKS	EKQIRKWFENKRMKIKKS	EYQIRKWFENKRWKIKKS	EKQILTWFQNKRVKIKKS	EFQILGWFRNKRRKIKKS	ERQICLWFQNKRAKIKKS	EMQIRWWFQNKRQKIKKS	ELQIAYWFANKRRKIKKS	ETQIAMWFRNKRRKIKKS	ELQIVEWFWNKRGKIKKS	EPQIMMWFSNKRRKIKKS	EKQILFWFQNKRKKIKKS	EVQISYWFSNKRKKIKKS	ELQIVNWFQNKRKKIKKS	ERQITDWFGNKRKKIKKS	ERQISNWFANKRAKIKKS	ERQIAMWFSNKRRKIKKS	EKQIGYWFENKRRKIKKS	ETQIANWFSNKRRKIKKS	ELQIKFWFQNKRKKIKKS	ECQIMNWFKNKRKKIKKS	NERQITLWCNKRSKIKKS	EKQIAYWFSNKRKKIKKS	EIQISRWFQNKRWKIKKS	EAQIARWFRNKRWKIKKS	ELQISRWFWNKRWKIKKS	EAQIGRWFLNKRYKIKKS	ERQIVRWFQNKRQKIKKS	EKQISLWFKNKRFKIKKS	EGQILDWFRNKRYKIKKS	ELQIADWFRNKRFKIKKS	EKQIGKWFDNKRQKIKKS	EKQIVKWFNNKRVKIKKS	ETQISKWFENKRRKIKKS	EKQISKWFDNKRVKIKKS	EFQIARWFQNKRAKIKKS	EPQIAKWFRNKRAKIKKS	EVQIMVWFQNKRYKIKKS	ETQILKWFANKRYKIKKS	ERQILVWFANKRAKIKKS	ERQIMLWFKNKRYKIKKS
>132.272.AAA	>132.141.AAC	>132.309.AAG	>132.271.AAT	>132.291.ACA	>132.285.ACC	>132.171.ACG	>132.203.ACT	>132.259.AGA	>132.301.AGC	>132.300.AGG	>132.295.AGT	>132.286.ATA	>132.79.ATC	>132.273.ATG	>132.172.ATT	>132.113.CAA	>132.84.CAC	>132.514.CAG	>132.132.CAT	>132.208.CCA	>132.427.CCC	>132.325.CCG	>132.194.CCT	>132.378.CGA	>132.330.CGC	>132.94.CGG	>132.357.CGT	>132.328.CTA	>132.69.CTC	>132.28.CTG	>132.169.CTT	>132.83.GAA	>132.24.GAC	>132.100.GAG	>132.33.GAT	>132.44.GCA	>132.22.GCC	>132.39.GCG	>132.35.GCT	>132.109.GGA	>132.37.GGC	>132.180.GGG	>132.103.GGT	>132.64.GTA	>132.50.GTC	>132.65.GTG	>132.116.GTT	>132.114.TAA	>132.107.TAC
ESQIMCWFANKRYKIKKS	ESQIASWFRNKRHKIKKS	EKQISSWFWNKRHKIKKS	ERQIQQWFANKRFKIKKS	EMQIYNWFNNKRRKIKKS	EAQIMSWFHNKRVKIKKS	EIQITWWFENKRRKIKKS	EIQIKNWFENKRKKIKKS	ELQIFRWFANKRQKIKKS	ECQII_WFINKRIKIKKS	EGQIAKWFENKRAKIKKS	EKQIKKWFENKRSKIKKS	EAQIKYWFQNKRSKIKKS	EAQIQ_WFLNKRTKIKKS	ERQIVIWFQNKRSKIKKS	EFQIRIWFSNKRGKIKKS	EKQILYWFQNKRRKIKKS	ERQILSWFSNKRRKIKKS	EKQISSWFINKRRKIKKS	ESQILQWFSNKRRKIKKS	ERQIMNWFQNKRKKIKKS	ERQIMTWFSNKRKKIKKS	ETQILNWFQNKRKKIKKS	ERQITDWFHNKRRKIKKS	ESQIFNWFSNKRRKIKKS	EQQIMYWFSNKRRKIKKS	ESQITRWFENKRRKIKKS	ELQIRRWFSNKRAKIKKS	ETQIMYWFSNKRKKIKKS	EVQIQYWFGNKRKKIKKS	ETQILNWFQNKRKKIKKS	EQQIRYWFSNKRAKIKKS	EHQISRWFQNKRWKIKKS	EMQIERWFRNKRFKIKKS	ERQIQTWFWNKRYKIKKS	ECQISRWFLNKRYKIKKS	ERQIYHWFRNKRAKIKKS	ESQIGVWFKNKRYKIKKS	EPQITDWFRNKRFKIKKS	EGQIMDWFRNKRYKIKKS	EVQITKWFDNKRQKIKKS	ERQIVKWFNNKRAKIKKS	EQQISKWFENKRSKIKKS	ERQIAKWFDNKRTKIKKS	EMQIIKWFQNKRWKIKKS	ENQISRWFGNKRFKIKKS	EVQILRWFENKRFKIKKS	ELQILVWFRNKRFKIKKS	ERQITTWFQNKRAKIKKS	EKQIRLWFSNKRVKIKKS
>133.272.AAA	>133.141.AAC	>133.307.AAG	>133.265.AAT	>133.288.ACA	>133.283.ACC	>133.169.ACG	>133.203.ACT	>133.258.AGA	>133.300.AGC	>133.299.AGG	>133.293.AGT	>133.285.ATA	>133.75.ATC	>133.271.ATG	>133.171.ATT	>133.113.CAA	>133.84.CAC	>133.509.CAG	>133.132.CAT	>133.208.CCA	>133.426.CCC	>133.321.CCG	>133.194.CCT	>133.378.CGA	>133.330.CGC	>133.94.CGG	>133.355.CGT	>133.328.CTA	>133.69.CTC	>133.28.CTG	>133.169.CTT	>133.83.GAA	>133.23.GAC	>133.99.GAG	>133.33.GAT	>133.44.GCA	>133.22.GCC	>133.39.GCG	>133.35.GCT	>133.108.GGA	>133.36.GGC	>133.179.GGG	>133.103.GGT	>133.64.GTA	>133.50.GTC	>133.65.GTG	>133.114.GTT	>133.112.TAA	>133.106.TAC
EKQIMVWFANKRFKIKKS	ESQISSWFRNKRFKIKKS	ERQIVQWFWNKRHKIKKS	EMQIKSWFSNKRFKIKKS	ERQILDWFNNKRRKIKKS	ERQIYSWFKNKRVKIKKS	EGQIRAWFKNKRYKIKKS	EKQIISWFHNKRMKIKKS	EAQIFRWFANKRAKIKKS	EVQIMRWFSNKRVKIKKS	EQQIQSWFSNKRHKIKKS	EKQIKRWFENKRWKIKKS	EVQIKYWFNNKRAKIKKS	ECQIASWFHNKRFKIKKS	EKQIVYWFQNKRWKIKKS	ERQIRLWFQNKRAKIKKS	EIQIYYWFQNKRRKIKKS	EVQIGYWFSNKRRKIKKS	ERQIMHWFWNKRRKIKKS	EGQIGNWFSNKRRKIKKS	EKQINDWFANKRKKIKKS	EVQISNWFSNKRKKIKKS	ESQIRDWFQNKRKKIKKS	EVQITNWFGNKRKKIKKS	ETQIFHWFANKRRKIKKS	EMQIRMWFSNKRRKIKKS	EVQIVHWFENKRRKIKKS	EVQIVNWFSNKRRKIKKS	ENQISMWFANKRKKIKKS	EMQIRYWFSNKRKKIKKS	ERQIVMWFQNKRRKIKKS	EPQIAMWFSNKRRKIKKS	EVQIFHWFKNKRFKIKKS	EGQIRRWFRNKRWKIKKS	ELQIMRWFWNKRYKIKKS	EEQIMSWFRNKRYKIKKS	EAQIQRWFQNKRWKIKKS	ELQIRVWFKNKRYKIKKS	EMQITDWFRNKRFKIKKS	ESQISDWFRNKRFKIKKS	E_QIRSWFFNKRRKIKKS	EYQILKWFNNKRMKIKKS	EKQIMKWFENKRVKIKKS	EKQITKWFDNKRVKIKKS	EMQIVRWFQNKRWKIKKS	EGQIMKWFRNKRAKIKKS	ELQISKWFENKRYKIKKS	ERQIVTWFSNKRFKIKKS	ELQIASWFANKRLKIKKS	EKQIRLWFSNKRFKIKKS
>134.271.AAA	>134.141.AAC	>134.303.AAG	>134.265.AAT	>134.285.ACA	>134.282.ACC	>134.169.ACG	>134.202.ACT	>134.258.AGA	>134.298.AGC	>134.298.AGG	>134.288.AGT	>134.284.ATA	>134.74.ATC	>134.270.ATG	>134.170.ATT	>134.113.CAA	>134.83.CAC	>134.508.CAG	>134.132.CAT	>134.204.CCA	>134.424.CCC	>134.317.CCG	>134.192.CCT	>134.375.CGA	>134.328.CGC	>134.93.CGG	>134.354.CGT	>134.318.CTA	>134.65.CTC	>134.28.CTG	>134.168.CTT	>134.82.GAA	>134.23.GAC	>134.99.GAG	>134.33.GAT	>134.44.GCA	>134.22.GCC	>134.39.GCG	>134.35.GCT	>134.107.GGA	>134.36.GGC	>134.176.GGG	>134.103.GGT	>134.64.GTA	>134.50.GTC	>134.64.GTG	>134.114.GTT	>134.110.TAA	>134.106.TAC
EPQISSWFANKRHKIKKS	EVQISGWFRNKRHKIKKS	EKQINQWFWNKRWKIKKS	EKQIVQWFSNKRFKIKKS	EMQIRWWFENKRRKIKKS	ERQIVTWFHNKRTKIKKS	EVQIRHWFENKRRKIKKS	EWQINFWFMNKRYKIKKS	ESQIKSWFNNKRYKIKKS	EIQIVRWFSNKRVKIKKS	EAQIAKWFENKRRKIKKS	EKQIRKWFENKRNKIKKS	ERQIACWFANKRVKIKKS	EFQIGKWFANKRTKIKKS	ERQILIWFQNKRSKIKKS	ERQISVWFQNKRVKIKKS	ERQIHDWFVNKRRKIKKS	ESQIGTWFRNKRRKIKKS	EMQISWWFWNKRRKIKKS	ELQIGYWFSNKRRKIKKS	ERQIMQWFQNKRKKIKKS	EVQIMNWFSNKRKKIKKS	EIQIVYWFENKRRKIKKS	EGQILNWFSNKRKKIKKS	EVQIFYWFANKRRKIKKS	ETQILYWFSNKRRKIKKS	ENQIRRWFENKRRKIKKS	EKQISNWFSNKRRKIKKS	ESQIANWFANKRKKIKKS	ERQILNWFSNKRKKIKKS	ELQIVNWFQNKRKKIKKS	EAQICYWFGNKRKKIKKS	EWQILRWFQNKRWKIKKS	EGQIVRWFRNKRWKIKKS	ELQIARWFWNKRWKIKKS	EVQIMVWFRNKRWKIKKS	ESQIMKWFQNKRLKIKKS	ELQIVRWFKNKRYKIKKS	EWQIQRWFKNKRYKIKKS	EMQIINWFRNKRYKIKKS	EYQIKKWFDNKRQKIKKS	EKQITKWFNNKRQKIKKS	EQQILKWFENKRTKIKKS	ERQILKWFSNKRVKIKKS	EKQILRWFQNKRIKIKKS	EEQIRRWFGNKRAKIKKS	ESQISRWFENKRYKIKKS	EKQILRWFGNKRFKIKKS	EKQIACWFVNKRAKIKKS	EEQIRIWFSNKRVKIKKS
>135.269.AAA	>135.141.AAC	>135.303.AAG	>135.264.AAT	>135.284.ACA	>135.276.ACC	>135.167.ACG	>135.202.ACT	>135.257.AGA	>135.297.AGC	>135.297.AGG	>135.287.AGT	>135.283.ATA	>135.73.ATC	>135.270.ATG	>135.168.ATT	>135.111.CAA	>135.83.CAC	>135.507.CAG	>135.132.CAT	>135.203.CCA	>135.421.CCC	>135.317.CCG	>135.184.CCT	>135.369.CGA	>135.325.CGC	>135.92.CGG	>135.352.CGT	>135.315.CTA	>135.63.CTC	>135.28.CTG	>135.167.CTT	>135.82.GAA	>135.23.GAC	>135.99.GAG	>135.33.GAT	>135.43.GCA	>135.22.GCC	>135.38.GCG	>135.35.GCT	>135.107.GGA	>135.36.GGC	>135.174.GGG	>135.102.GGT	>135.64.GTA	>135.49.GTC	>135.63.GTG	>135.113.GTT	>135.107.TAA	>135.106.TAC
ESQINSWFANKRFKIKKS	EVQIGTWFRNKRFKIKKS	EKQIAQWFWNKRHKIKKS	ERQIGNWFSNKRFKIKKS	EWQISTWFKNKRFKIKKS	EKQITTWFHNKRNKIKKS	ESQIKNWFENKRRKIKKS	ERQIMMWFHNKRQKIKKS	EHQIFRWFANKRHKIKKS	EQQINRWFNNKRVKIKKS	ERQIVKWFENKRAKIKKS	EKQIHKWFMNKRYKIKKS	ERQILSWFANKRAKIKKS	ETQILRWFSNKRWKIKKS	EQQISWWFNNKRLKIKKS	ERQIKVWFQNKRSKIKKS	ETQIHYWFVNKRRKIKKS	EKQIGCWFSNKRRKIKKS	ENQISNWFWNKRRKIKKS	ERQITNWFSNKRRKIKKS	ERQIHNWFANKRKKIKKS	ELQISNWFHNKRKKIKKS	EVQIANWFQNKRKKIKKS	ERQISNWFGNKRKKIKKS	EKQIYYWFCNKRRKIKKS	ETQIMYWFSNKRRKIKKS	ETQISHWFENKRRKIKKS	EKQIIYWFGNKRMKIKKS	EVQIFYWFANKRRKIKKS	ESQIKYWFGNKRKKIKKS	ERQICNWFQNKRRKIKKS	EIQIRMWFSNKRKKIKKS	ENQIGRWFQNKRWKIKKS	EEQINRWFRNKRFKIKKS	EGQIMRWFWNKRWKIKKS	EVQITQWFRNKRYKIKKS	EVQILRWFQNKRAKIKKS	ERQILFWFKNKRYKIKKS	ERQIQDWFRNKRAKIKKS	ELQISCWFKNKRYKIKKS	EKQISKWFDNKRQKIKKS	ESQIRKWFSNKRVKIKKS	EKQITQWFSNQRRKIKKS	EKQITKWFSNKRMKIKKS	EYQIRRWFENKRQKIKKS	EVQISKWFRNKRAKIKKS	ESQISIWFQNKRYKIKKS	EKQIEVWFRNKRYKIKKS	EKQILGWFNNKRQKIKKS	EEQIRVWFSNKRSKIKKS
>136.268.AAA	>136.140.AAC	>136.300.AAG	>136.261.AAT	>136.281.ACA	>136.265.ACC	>136.166.ACG	>136.201.ACT	>136.256.AGA	>136.295.AGC	>136.295.AGG	>136.286.AGT	>136.283.ATA	>136.73.ATC	>136.269.ATG	>136.166.ATT	>136.111.CAA	>136.82.CAC	>136.496.CAG	>136.132.CAT	>136.202.CCA	>136.414.CCC	>136.317.CCG	>136.181.CCT	>136.367.CGA	>136.320.CGC	>136.92.CGG	>136.352.CGT	>136.314.CTA	>136.60.CTC	>136.27.CTG	>136.167.CTT	>136.81.GAA	>136.23.GAC	>136.99.GAG	>136.33.GAT	>136.43.GCA	>136.22.GCC	>136.38.GCG	>136.34.GCT	>136.105.GGA	>136.35.GGC	>136.170.GGG	>136.102.GGT	>136.63.GTA	>136.49.GTC	>136.63.GTG	>136.113.GTT	>136.106.TAA	>136.106.TAC
EGQITTWFANKRHKIKKS	ESQIMMWFRNKRFKIKKS	EKQIKQWFWNKRSKIKKS	EQQITSWFANKRFKIKKS	EQQIVNWFNNKRRKIKKS	EKQIMSWFHNKRMKIKKS	ERQILCWFSNKRRKIKKS	EKQIKLWFQNKRKKIKKS	EWQIVAWFKNKRYKIKKS	ELQIHGWFYNKRVKIKKS	ESQISKWFDNKRYKIKKS	EKQIRKWFENKRMKIKKS	EKQIFAWFANKRQKIKKS	ECQIASLFHNKRNKIKKS	ERQISTWFQNKRDKIKKS	ERQIKVWFQNKRNKIKKS	ERQISGWFANKRRKIKKS	EQQIGNWFRNKRRKIKKS	ELQIMLWFYNKRSKIKKS	EMQILYWFSNKRRKIKKS	EMQITQWFQNKRKKIKKS	EMQIYNWFSNKRKKIKKS	EQQIRDWFQNKRKKIKKS	ERQILDWFSNKRKKIKKS	EVQIFHWFANKRKKIKKS	EKQIYYWFSNKRRKIKKS	EVQIRYWFENKRRKIKKS	EKQISYWFDNKRRKIKKS	ERQISCWFANKRKKIKKS	EMQIRFWFSNKRKKIKKS	EQQIVNWFQNKRRKIKKS	EKQINNWFGNKRKKIKKS	EAQILRWFQNKRWKIKKS	EHQIERWFRNKRWKIKKS	EQQISRWFMNKRWKIKKS	EQQISKWFVNKRWKIKKS	EVQILRWFQNKRRKIKKS	EAQIKVWFKNKRFKIKKS	EFQISDWFRNKRYKIKKS	EAQITRWFKNKRYKIKKS	ERQIAKWFSNKREKIKKS	EVQIDGWFMNKRKKIKKS	EKQINKWFENKRTKIKKS	ERQIVKWFSNKRHKIKKS	EKQICRWFENKRFKIKKS	EPQISKWFRNKRFKIKKS	ERQILKWFENKRFKIKKS	ENQIVRWFSNKRFKIKKS	ERQIATWFVNKRAKIKKS	ENQIRIWFSNKRVKIKKS
>137.268.AAA	>137.140.AAC	>137.299.AAG	>137.259.AAT	>137.278.ACA	>137.263.ACC	>137.163.ACG	>137.199.ACT	>137.255.AGA	>137.292.AGC	>137.293.AGG	>137.284.AGT	>137.279.ATA	>137.73.ATC	>137.269.ATG	>137.165.ATT	>137.111.CAA	>137.82.CAC	>137.496.CAG	>137.132.CAT	>137.201.CCA	>137.413.CCC	>137.313.CCG	>137.181.CCT	>137.366.CGA	>137.319.CGC	>137.90.CGG	>137.351.CGT	>137.313.CTA	>137.60.CTC	>137.26.CTG	>137.167.CTT	>137.81.GAA	>137.23.GAC	>137.98.GAG	>137.33.GAT	>137.43.GCA	>137.21.GCC	>137.38.GCG	>137.34.GCT	>137.104.GGA	>137.33.GGC	>137.170.GGG	>137.102.GGT	>137.63.GTA	>137.47.GTC	>137.62.GTG	>137.113.GTT	>137.102.TAA	>137.105.TAC
ERQIHEWFGNKRMKIKKS	EVQIGQWFRNKRWKIKKS	ERQIMQWFWNKRWKIKKS	EKQIGSWFNNKRFKIKKS	EKQIKMWFQNKRRKIKKS	EGQITSWFHNKRTKIKKS	ELQIKRWFENKRRKIKKS	E_QIIAWFLNKRGKIKKS	ESQIFRWFANKRQKIKKS	ETQIRRWFSNKRVKIKKS	EQQIRKWFENKRMKIKKS	EPQIVKWFENKRYKIKKS	EVQIRWWFNNKRSKIKKS	ECQITRWFWNKRHKIKKS	EKQILYWFQNKRHKIKKS	ERQITVWFQNKRQKIKKS	ESQIIYWFQNKRRKIKKS	ELQICYWFSNKRRKIKKS	EKQIMWWFWNKRRKIKKS	EGQISCWFSNKRRKIKKS	ERQILMWFQNKRKKIKKS	ETQIMNWFSNKRKKIKKS	ETQISDWFQNKRKKIKKS	EKQILNWFSNKRKKIKKS	ERQIMLWFQNKRSKIKKS	ERQIAMWFSNKRRKIKKS	ETQILLWFANKRSKIKKS	ERQILTWFSNKRRKIKKS	EEQIFYWFANKRRKIKKS	EGQIRMWFSNKRKKIKKS	ETQIRYWFQNKRKKIKKS	ETQIRDWFGNKRRKIKKS	EAQIKRWFQNKRWKIKKS	EEQIVRWFRNKRFKIKKS	EVQIMRWFWNKRYKIKKS	EQQILVWFRNKRWKIKKS	ELQITHWFRNKRWKIKKS	ESQIRYWFKNKRFKIKKS	EPQINDWFRNKRFKIKKS	EQQIADWFRNKRAKIKKS	EMQISKWFDNKRWKIKKS	ESQIRKWFNNKRTKIKKS	ESQISKWFENKRRKIKKS	ESQIKKWFDNKRYKIKKS	EGQIMRWFQNKRMKIKKS	ELQILKWFRNKRFKIKKS	EWQIGKWFENKRWKIKKS	ERQIVKWFANKRQKIKKS	EAQILRWFANKRAKIKKS	EHQIRIWFSNKRVKIKKS
>138.268.AAA	>138.139.AAC	>138.296.AAG	>138.259.AAT	>138.276.ACA	>138.253.ACC	>138.163.ACG	>138.199.ACT	>138.254.AGA	>138.291.AGC	>138.293.AGG	>138.281.AGT	>138.277.ATA	>138.72.ATC	>138.267.ATG	>138.164.ATT	>138.109.CAA	>138.81.CAC	>138.492.CAG	>138.132.CAT	>138.200.CCA	>138.413.CCC	>138.313.CCG	>138.181.CCT	>138.365.CGA	>138.319.CGC	>138.89.CGG	>138.345.CGT	>138.312.CTA	>138.59.CTC	>138.25.CTG	>138.167.CTT	>138.81.GAA	>138.23.GAC	>138.97.GAG	>138.32.GAT	>138.43.GCA	>138.21.GCC	>138.38.GCG	>138.34.GCT	>138.104.GGA	>138.32.GGC	>138.168.GGG	>138.102.GGT	>138.63.GTA	>138.46.GTC	>138.62.GTG	>138.113.GTT	>138.99.TAA	>138.105.TAC
EKQIASWFANKRFKIKKS	ERQIAAWFRNKRFKIKKS	EQQISQWFWNKRFKIKKS	ERQIMQWFTNKRFKIKKS	EAQIKHWFWNKRRKIKKS	EKQIAGWFHNKRVKIKKS	EKQIIHWFENKRRKIKKS	ETQILGWFSNKRRKIKKS	EAQIRTWFNNKRYKIKKS	EKQISRWFNNKRVKIKKS	ERQIAKWFENKRSKIKKS	ERQIRRWFENKRFKIKKS	ERQIASWFANKRVKIKKS	ETQI_DWFSNKRIKIKKS	EAQIMGWFQNKRGKIKKS	ERQIYVWFMNKRAKIKKS	EVQIFNWFANKRRKIKKS	ELQIAYWFSNKRRKIKKS	EEQISWWFWNKRRKIKKS	ELQISNWFGNKRRKIKKS	ERQITQWFQNKRKKIKKS	ERQIADWFSNKRKKIKKS	EMQITNWFHNKRKKIKKS	EKQIVNWFSNKRKKIKKS	EKQIMYWFSNKRTKIKKS	EVQIRNWFSNKRRKIKKS	EQQIARWFENKRRKIKKS	EVQINNWFSNKRRKIKKS	ENQISFWFGNKRRKIKKS	ETQIQYWFGNKRKKIKKS	ERQISMWFENKRRKIKKS	EKQIVYWFGNKRKKIKKS	EKQISRWFQNKRWKIKKS	EWQIVRWFRNKRWKIKKS	EKQITRWFWNKRWKIKKS	EMQIGRWFINKRYKIKKS	EMQILKWFQNKRFKIKKS	EKQIVVWFVNKRWKIKKS	EAQIGSWFKNKRWKIKKS	EKQIALWFKNKRWKIKKS	EIQISKWFDNKRWKIKKS	EKQILKWFNNKRVKIKKS	EKQINKWFENKRLKIKKS	EFQIAKWFNNKRLKIKKS	EMQIERWFQNKRYKIKKS	EVQILKWFRNKRYKIKKS	EMQITRWFENKRYKIKKS	EAQIMKWFSNKRAKIKKS	ERQISVWFSNQRSKIKKS	EKQIRLWFSNKRAKIKKS
>139.268.AAA	>139.138.AAC	>139.292.AAG	>139.258.AAT	>139.273.ACA	>139.250.ACC	>139.158.ACG	>139.199.ACT	>139.253.AGA	>139.291.AGC	>139.292.AGG	>139.281.AGT	>139.276.ATA	>139.72.ATC	>139.265.ATG	>139.164.ATT	>139.109.CAA	>139.81.CAC	>139.492.CAG	>139.131.CAT	>139.200.CCA	>139.410.CCC	>139.307.CCG	>139.180.CCT	>139.364.CGA	>139.315.CGC	>139.89.CGG	>139.343.CGT	>139.310.CTA	>139.59.CTC	>139.25.CTG	>139.167.CTT	>139.81.GAA	>139.23.GAC	>139.97.GAG	>139.32.GAT	>139.42.GCA	>139.21.GCC	>139.38.GCG	>139.34.GCT	>139.103.GGA	>139.32.GGC	>139.167.GGG	>139.102.GGT	>139.63.GTA	>139.46.GTC	>139.62.GTG	>139.112.GTT	>139.98.TAA	>139.103.TAC
ERRRQQLSSELGLKIKKS	ESQISSWFRNKRFKIKKS	EKQISSWFWNKRFKIKKS	EVQIASWFSNKRFKIKKS	ESQIYDWFNNKRRKIKKS	ETQIQHWFHNKRVKIKKS	EKQIVRWFENKRRKIKKS	ESQISSWFHNKRMKIKKS	ESQIFRWFANKRFKIKKS	EQQILVWFSNKRAKIKKS	EMQITKWFDNKRQKIKKS	EQQIKKWFENKRHKIKKS	EKQIFYWFQNKRSKIKKS	EVQISPWFNNKRVKIKKS	EVQIVYWFQNKRTKIKKS	EKQIKVWFQNKRSKIKKS	ELQIMCWFQNKRRKIKKS	EVQIRMWFSNKRRKIKKS	ETQINHWFWNKRRKIKKS	EHQISNWFANKRRKIKKS	ESQIGNWFANKRKKIKKS	EVQIRDWFSNKRKKIKKS	EGQIMNWFSNKRKKIKKS	ELQIANWFGNKRKKIKKS	ELQISYWFGNKRAKIKKS	ELQIVRWFSNKRRKIKKS	ETQIQRWFENKRRKIKKS	EQQINYWFSNKRRKIKKS	EVQIMLWFQNKRKKIKKS	ERQIACWFSNKRKKIKKS	ERQICYWFENKRKKIKKS	ERQIMQWFSNKRRKIKKS	ESQIKRWFQNKRWKIKKS	EAQIVRWFRNKRWKIKKS	ETQINRWFWNKRYKIKKS	ETQILNWFRNKRWKIKKS	ERQILRWFQNKRLKIKKS	ERQIRVWFKNKRFKIKKS	ECQIRAWFKNKRYKIKKS	EQQITTWFKNKRFKIKKS	ESQITKWFDNKRFKIKKS	EGQITKWFNNKRMKIKKS	EMQISKWFENKRRKIKKS	EVQITKWFNNKRFKIKKS	ESQIIRWFQNKRGKIKKS	ELQITRWFSNKRAKIKKS	EKQIGRWFENKRAKIKKS	EQQIIKWFANKRSKIKKS	ENQIRIWFCNKRAKIKKS	EGQIRVWFSNKRAKIKKS
>140.267.AAA	>140.138.AAC	>140.288.AAG	>140.254.AAT	>140.273.ACA	>140.250.ACC	>140.157.ACG	>140.197.ACT	>140.253.AGA	>140.291.AGC	>140.292.AGG	>140.279.AGT	>140.275.ATA	>140.67.ATC	>140.264.ATG	>140.164.ATT	>140.109.CAA	>140.81.CAC	>140.488.CAG	>140.131.CAT	>140.199.CCA	>140.409.CCC	>140.306.CCG	>140.179.CCT	>140.363.CGA	>140.315.CGC	>140.87.CGG	>140.342.CGT	>140.310.CTA	>140.58.CTC	>140.25.CTG	>140.166.CTT	>140.81.GAA	>140.23.GAC	>140.96.GAG	>140.32.GAT	>140.42.GCA	>140.21.GCC	>140.38.GCG	>140.34.GCT	>140.103.GGA	>140.31.GGC	>140.167.GGG	>140.101.GGT	>140.63.GTA	>140.45.GTC	>140.62.GTG	>140.112.GTT	>140.97.TAA	>140.102.TAC
ERQIHYWFVNKRQKIKKS	EPQIASWFRNKRFKIKKS	ERQILQWFWNKRFKIKKS	EQQISSWFSNKRFKIKKS	EGQISNWFWNKRRKIKKS	EVQIWLWFRNKRGKIKKS	EKQIVTWFQNKRTKIKKS	ESQIAKWFHNKRCKIKKS	ERQIQRWFWNKRYKIKKS	E_QIPEWFGNKRLKIKKS	EQQIMKWFENKRYKIKKS	ESQIKKWFENKRYKIKKS	ERQIRWWFNNKRAKIKKS	ERQIANWFGNKRMKIKKS	ESQIRYWFQNKRSKIKKS	EAQIKVWFQNKRNKIKKS	ERQIADWFANKRRKIKKS	EKQIGMWFRNKRRKIKKS	EPQIKYWFWNKRRKIKKS	ERQIAQWFSNKRRKIKKS	EVQISNWFANKRKKIKKS	ESQIADWFSNKRKKIKKS	EMQIINWFQNKRKKIKKS	ERQINNWFHNKRKKIKKS	ERQIFDWFSNKRRKIKKS	EVQIRMWFSNKRRKIKKS	ELQIGRWFENKRRKIKKS	ESQIVNWFSNKRRKIKKS	ELQIMYWFSNKRKKIKKS	EVQIGNWFRNKRKKIKKS	EKQIMNWFQNKRKKIKKS	EKQITNWFGNKRKKIKKS	ETQIERWFQNKRYKIKKS	EQQIVRWFRNKRWKIKKS	EGQITRWFWNKRYKIKKS	EEQILVWFRNKRYKIKKS	EKQIYHWFRNKRAKIKKS	ESQIRMWFKNKRFKIKKS	EQQIRAWFKNKRFKIKKS	EKQISTWFKNKRYKIKKS	EKQIGKWFDNKRCKIKKS	ESQIMKWFNNKRLKIKKS	EGQIAKWFENKRRKIKKS	EKQICKWFSNKRVKIKKS	EGQIKRWFQNKRGKIKKS	EWQILKWFRNKRFKIKKS	ELQIGRWFENKRYKIKKS	ELQIMAWFRNKRYKIKKS	ERQIAVWFANKRSKIKKS	ESQIRVWFSNKRAKIKKS
>141.267.AAA	>141.137.AAC	>141.287.AAG	>141.252.AAT	>141.273.ACA	>141.247.ACC	>141.156.ACG	>141.197.ACT	>141.252.AGA	>141.291.AGC	>141.289.AGG	>141.278.AGT	>141.275.ATA	>141.67.ATC	>141.264.ATG	>141.162.ATT	>141.108.CAA	>141.81.CAC	>141.485.CAG	>141.130.CAT	>141.199.CCA	>141.409.CCC	>141.305.CCG	>141.177.CCT	>141.361.CGA	>141.315.CGC	>141.85.CGG	>141.338.CGT	>141.309.CTA	>141.55.CTC	>141.25.CTG	>141.164.CTT	>141.81.GAA	>141.23.GAC	>141.94.GAG	>141.32.GAT	>141.41.GCA	>141.21.GCC	>141.38.GCG	>141.34.GCT	>141.102.GGA	>141.31.GGC	>141.165.GGG	>141.101.GGT	>141.62.GTA	>141.45.GTC	>141.61.GTG	>141.112.GTT	>141.97.TAA	>141.101.TAC
ERQISSWFANKRFKIKKS	ERQINSWFRNKRFKIKKS	ERQISQWFWNKRYKIKKS	EKQIVSWFSNKRFKIKKS	EKQIAQWFWNKRRKIKKS	EKQITTWFANKRKKIKKS	ESQICTWFQNKRSKIKKS	EGQIVTWFVNKRLKIKKS	ETQIFRWFANKRHKIKKS	ERQIMMWFSNKRTKIKKS	EGQIMMWFANKRGKIKKS	ELQIRKWFENKRHKIKKS	EQQIRWWFNNKRFKIKKS	ELQIEWWFANKRFKIKKS	ERQITYWFQNKRWKIKKS	ETQIRIWFQNKRAKIKKS	ELQIMQWFQNKRRKIKKS	EMQIAYWFSNKRRKIKKS	EVQISWWFWNKRRKIKKS	ERQIGDWFSNKRRKIKKS	EEQIHNWFANKRKKIKKS	ERQIQDWFSNKRKKIKKS	ERQIMNWFQNKRKKIKKS	EIQISNWFGNKRKKIKKS	EKQISYWFSNKRAKIKKS	ESQIVYWFSNKRRKIKKS	ENQIRYWFENKRRKIKKS	ERQIENWFSNKRRKIKKS	ETQIQFWFSNKRRKIKKS	EVQIRHWFSNKRKKIKKS	EVQIQYWFENKRRKIKKS	EKQIVYWFGNKRKKIKKS	ETQIIRWFQNKRWKIKKS	EAQISRWFRNKRFKIKKS	ERQISRWFWNKRYKIKKS	EGQIVMWFRNKRYKIKKS	EKQIFDWFRNKRAKIKKS	EAQIRVWFKNKRWKIKKS	EVQILDWFRNKRYKIKKS	EFQINNWFRNKRFKIKKS	EMQIAKWFDNKRQKIKKS	ERQICKWFNNKRQKIKKS	ERQISKWFENKRRKIKKS	ERQIMKWFDNKRCKIKKS	ERQILRWFQNKRLKIKKS	ERQITKWFRNKRWKIKKS	EQQIGRWFENKRYKIKKS	ERQIQRWFANKRYKIKKS	ERQITVWFRNKRAKIKKS	EEQIRIWFSNKRAKIKKS
>142.266.AAA	>142.137.AAC	>142.284.AAG	>142.251.AAT	>142.271.ACA	>142.246.ACC	>142.156.ACG	>142.197.ACT	>142.251.AGA	>142.291.AGC	>142.288.AGG	>142.278.AGT	>142.273.ATA	>142.67.ATC	>142.264.ATG	>142.161.ATT	>142.108.CAA	>142.81.CAC	>142.484.CAG	>142.130.CAT	>142.199.CCA	>142.405.CCC	>142.303.CCG	>142.177.CCT	>142.359.CGA	>142.313.CGC	>142.85.CGG	>142.336.CGT	>142.306.CTA	>142.55.CTC	>142.25.CTG	>142.163.CTT	>142.80.GAA	>142.23.GAC	>142.93.GAG	>142.32.GAT	>142.41.GCA	>142.21.GCC	>142.38.GCG	>142.34.GCT	>142.102.GGA	>142.31.GGC	>142.165.GGG	>142.100.GGT	>142.62.GTA	>142.45.GTC	>142.60.GTG	>142.111.GTT	>142.96.TAA	>142.100.TAC
EKQISYWFINKRFKIKKS	ERQICSWFRNKRHKIKKS	ETQIMQWFWNKRFKIKKS	EGQIMKWFNNKRMKIKKS	ESQIKDWFNNKRRKIKKS	ESQISNWFHNKRTKIKKS	EAQIRYWFDNKRRKIKKS	EMQITTWFANKRSKIKKS	ELQICLWFNNKRTKIKKS	ERQIYYWFRNKRMKIKKS	ESQIPLWFRNKRVKIKKS	ERQIEKWFQNKRFKIKKS	EKQIMRWFANKRTKIKKS	ETQIRMWFANKRHKIKKS	EVQITLWFCNKRRKIKKS	ERQIVIWFQNKRSKIKKS	EYQICYWFQNKRRKIKKS	EKQISMWFSNKRRKIKKS	EVQITLWFPNKR_KIKKS	EMQISQWFSNKRRKIKKS	EPQICNWFANKRKKIKKS	EKQICDWFSNKRKKIKKS	EVQIRDWFANKRKKIKKS	EIQITNWFSNKRKKIKKS	EFQIFNWFANKRRKIKKS	ELQIRYWFGNKRRKIKKS	ERQIACWFENKRRKIKKS	EKQIYNWFSNKRRKIKKS	EGQILNWFANKRQKIKKS	EAQIRFWFSNKRKKIKKS	EKQIMYWFWNKRRKIKKS	ERQILLWFSNKRKKIKKS	ELQICRWFQNKRWKIKKS	ESQISRWFRNKRWKIKKS	ELQISRWFWNKRYKIKKS	EGQILTWFRNKRWKIKKS	ENQINRWFQNKRRKIKKS	EPQIRIWFKNKRYKIKKS	EKQIVDWFRNKRFKIKKS	EPQISDWFRNKRYKIKKS	ERQITKWFDNKRWKIKKS	EWQIVKWFNNKRTKIKKS	EYQIRKWFENKRRKIKKS	EVQIAKWFNNKRMKIKKS	EMQIGKWFQNKRWKIKKS	ERQIRRWFSNKRVKIKKS	EVQIGKWFENKRFKIKKS	EFQIGKWFANKRFKIKKS	ERQILRWFANKRAKIKKS	EEQIRVWFSNKRAKIKKS
>143.265.AAA	>143.136.AAC	>143.282.AAG	>143.247.AAT	>143.271.ACA	>143.241.ACC	>143.155.ACG	>143.196.ACT	>143.250.AGA	>143.289.AGC	>143.281.AGG	>143.278.AGT	>143.273.ATA	>143.66.ATC	>143.262.ATG	>143.161.ATT	>143.108.CAA	>143.81.CAC	>143.479.CAG	>143.130.CAT	>143.197.CCA	>143.404.CCC	>143.295.CCG	>143.175.CCT	>143.354.CGA	>143.312.CGC	>143.85.CGG	>143.335.CGT	>143.306.CTA	>143.55.CTC	>143.25.CTG	>143.163.CTT	>143.79.GAA	>143.23.GAC	>143.92.GAG	>143.32.GAT	>143.41.GCA		>143.38.GCG	>143.34.GCT	>143.102.GGA	>143.31.GGC	>143.164.GGG	>143.100.GGT	>143.62.GTA	>143.44.GTC	>143.58.GTG	>143.111.GTT	>143.95.TAA	>143.100.TAC
ERQIYYWFVNKRAKIKKS	ELQIASWFRNKRFKIKKS	ESQIKQWFWNKRHKIKKS	ERQIIQWFSNKRFKIKKS	ERQIMNWFNNKRRKIKKS	ERQIMNWFHNKRVKIKKS	EKQILTWFHNKRNKIKKS	ERQIRNWFQNKRKKIKKS	ETQINRWFMNKRHKIKKS	EYQITTWFRNKRLKIKKS	ERQIMKWFENKRAKIKKS	ERQITKWFENKRFKIKKS	EVQITTWFNNKRAKIKKS	ERQIKNWFGNKRWKIKKS	ERQILYWFQNKRSKIKKS	EAQIKVWFQNKRSKIKKS	EPQISNWFSNKRRKIKKS	EGQIGMWFRNKRRKIKKS	ELQISRWFWNKRRKIKKS	ELQITTWFANKRRKIKKS	ECQISYWFQNKRKKIKKS	ERQIMDWFANKRKKIKKS	ERQITYWFENKRRKIKKS	EMQICNWFHNKRKKIKKS	ERQIRYWFANKRMKIKKS	EKQIYYWFSNKRRKIKKS	EGQISRWFENKRRKIKKS	EVQIYYWFSNKRRKIKKS	EVQISYWFSNKRKKIKKS	EVQIRFWFSNKRKKIKKS	ERQIRYWFENKRRKIKKS	ESQIANWFSNKRRKIKKS	ESQILRWFQNKRWKIKKS	EYQIQRWFRNKRWKIKKS	EMQIMRWFWNKRYKIKKS	ELQIAVWFRNKRYKIKKS	ERQIIKWFQNKRMKIKKS		ERQITDWFRNKRFKIKKS	ERQIWNWFRNKRYKIKKS	EKQIQKWFDNKRQKIKKS	ERQIAKWFNNKRVKIKKS	ERQILKWFENKRRKIKKS	EQQISKWFNNKRMKIKKS	EAQIFRWFANKRFKIKKS	EQQIAKWFRNKRFKIKKS	EVQICRWFENKRYKIKKS	ENQISRWFSNKRAKIKKS	ERQISLWFANKRAKIKKS	EQQIRLWFSNKRAKIKKS
>144.264.AAA	>144.136.AAC	>144.281.AAG	>144.246.AAT	>144.270.ACA	>144.239.ACC	>144.155.ACG	>144.193.ACT	>144.250.AGA	>144.282.AGC	>144.277.AGG	>144.277.AGT	>144.271.ATA	>144.66.ATC	>144.260.ATG	>144.161.ATT	>144.108.CAA	>144.80.CAC	>144.476.CAG	>144.130.CAT	>144.192.CCA	>144.400.CCC	>144.283.CCG	>144.175.CCT	>144.352.CGA	>144.312.CGC	>144.84.CGG	>144.328.CGT	>144.305.CTA	>144.55.CTC	>144.24.CTG	>144.162.CTT	>144.79.GAA	>144.23.GAC	>144.92.GAG	>144.32.GAT	>144.40.GCA		>144.37.GCG	>144.34.GCT	>144.102.GGA	>144.30.GGC	>144.160.GGG	>144.100.GGT	>144.62.GTA	>144.44.GTC	>144.58.GTG	>144.108.GTT	>144.94.TAA	>144.99.TAC
EFQIREWFCNKR_KIKKS	ERQIVSWFRNKRFKIKKS	ERQITQWFWNKRYKIKKS	EKQISQWFTNKRHKIKKS	EWQICWWFTNKRTKIKKS	ERQIRDWFHNKRTKIKKS	EWQISAWFKNKRYKIKKS	EFQIQAWFKNKRYKIKKS	EKQIMRWFWNKRYKIKKS	ESQIRMWFSNKRVKIKKS	ERQILKWFENKRRKIKKS	ESQISKWFENKRWKIKKS	ERQIHAWFKNKRFKIKKS	EVQIRMWFANKRYKIKKS	ESQIIYWFQNKRVKIKKS	ERQITVWFQNKRQKIKKS	EKQISYWFGNKRRKIKKS	EPQIGQWFRNKRRKIKKS	ERQISYWFWNKRRKIKKS	EQQIGTWFANKRRKIKKS	EMQITNWFANKRKKIKKS	ERQIRDWFSNKRKKIKKS	ETQIRYWFENKRKKIKKS	ESQISNWFSNKRKKIKKS	EKQILYWFANKRVKIKKS	EKQIGDWFSNKRRKIKKS	ERQILMWFENKRRKIKKS	ERQIEDWFSNKRRKIKKS	ERQIAMWFANKRAKIKKS	ERQIRFWFSNKRKKIKKS	EIQILYWFQNKRKKIKKS	ERQIMLWFGNKRKKIKKS	EAQI_EWFVNKRWKIKKS	EKQIERWFRNKRFKIKKS	EIQIARWFWNKRYKIKKS	ELQILVWFRNKRYKIKKS	ERQITDWFRNKRMKIKKS		EMQIGDWFRNKRYKIKKS	ERQIMAWFKNKRYKIKKS	ERQILKWFDNKRAKIKKS	ERQILAWFYNKRSKIKKS	EKQICKWFENKRRKIKKS	EQQILRWFDNKRQKIKKS	EQQISRWFQNKRLKIKKS	ENQIRRWFGNKRFKIKKS	EIQIGKWFENKRWKIKKS	ESQIIKWFSNKRFKIKKS	ERQIMVWFANKRSKIKKS	ESQIRIWFSNKRAKIKKS
>145.262.AAA	>145.135.AAC	>145.281.AAG	>145.240.AAT	>145.270.ACA	>145.236.ACC	>145.151.ACG	>145.191.ACT	>145.250.AGA	>145.276.AGC	>145.275.AGG	>145.277.AGT	>145.271.ATA	>145.66.ATC	>145.259.ATG	>145.159.ATT	>145.107.CAA	>145.80.CAC	>145.476.CAG	>145.129.CAT	>145.190.CCA	>145.396.CCC	>145.281.CCG	>145.173.CCT	>145.349.CGA	>145.311.CGC	>145.84.CGG	>145.326.CGT	>145.304.CTA	>145.54.CTC	>145.24.CTG	>145.162.CTT	>145.78.GAA	>145.23.GAC	>145.91.GAG	>145.32.GAT	>145.40.GCA		>145.37.GCG	>145.34.GCT	>145.100.GGA	>145.30.GGC	>145.159.GGG	>145.98.GGT	>145.62.GTA	>145.44.GTC	>145.57.GTG	>145.106.GTT	>145.94.TAA	>145.99.TAC
EIQIMIWFGNKRLKIKKS	ETQIRDWFRNKRHKIKKS	EKQILQWFWNKRWKIKKS	EKQITSWFCNKRFKIKKS	ERQISNWFWNHWRKIKKS	EYQIVAWFKNKRYKIKKS	EKQIMTWFQNKRTKIKKS	ERQIKHWFENKRKKIKKS	ERQILLWFHNKRWKIKKS	EKQIARWFNNKRVKIKKS	ESQIGKWFENKRYKIKKS	EYQIRGWFSNKRQKIKKS	EKQILSWFANKRSKIKKS	EPQILRWFANKRSKIKKS	EMQIVFWFQNKRSKIKKS	ERQIVVWFQNKRAKIKKS	ECQIHNWFCNKRRKIKKS	EEQISNWFRNKRRKIKKS	ETQIKYWFWNKRRKIKKS	ERQIANWFGNKRRKIKKS	ERQITMWFQNKRKKIKKS	ERQINDWFHNKRRKIKKS	ERQIQYWFENKRKKIKKS	ESQISNWFSNKRKKIKKS	ETQIFYWFSNKRRKIKKS	ERQIVMWFSNKRRKIKKS	ELQITYWFENKRRKIKKS	ELQIMNWFSNKRRKIKKS	ESQIITWFNNKRKKIKKS	ETQIHNWFTNKRKKIKKS	ERQITFWFQNKRQKIKKS	ELQIVYWFGNKRKKIKKS	ENQIFNWFRNKRWKIKKS	EHQIDRWFRNKRYKIKKS	ERQIMRWFWNKRWKIKKS	EGQINVWFRNKRYKIKKS	EQQIFDWFRNKRRKIKKS		EKQIDDWFRNKRFKIKKS	EMQIMDWFRNKRYKIKKS	EMQIVKWFDNKRQKIKKS	ESQILKWFNNKRQKIKKS	ELQIGKWFENKRRKIKKS	EWQIAKWFSNKRSKIKKS	EMQILRWFQNKRLKIKKS	EQQIAKWFRNKRNKIKKS	ELQILRWFENKRYKIKKS	ERQILSWFANKRYKIKKS	ERQITVWFSNKRAKIKKS	EKQIRLWFSNKRTKIKKS
>146.258.AAA	>146.135.AAC	>146.279.AAG	>146.239.AAT	>146.268.ACA	>146.236.ACC	>146.149.ACG	>146.190.ACT	>146.249.AGA	>146.275.AGC	>146.272.AGG	>146.275.AGT	>146.270.ATA	>146.62.ATC	>146.258.ATG	>146.156.ATT	>146.107.CAA	>146.80.CAC	>146.470.CAG	>146.129.CAT	>146.189.CCA	>146.395.CCC	>146.279.CCG	>146.171.CCT	>146.349.CGA	>146.311.CGC	>146.84.CGG	>146.325.CGT	>146.300.CTA	>146.54.CTC	>146.23.CTG	>146.160.CTT	>146.78.GAA	>146.23.GAC	>146.89.GAG	>146.32.GAT	>146.39.GCA		>146.37.GCG	>146.34.GCT	>146.98.GGA	>146.29.GGC	>146.159.GGG	>146.97.GGT	>146.62.GTA	>146.43.GTC	>146.57.GTG	>146.105.GTT	>146.93.TAA	>146.99.TAC
ERQIGMWFANKRHKIKKS	ERQIGGWFRNKRHKIKKS	ETQIKQWFWNKRYKIKKS	ERQIMAWFSNKRFKIKKS	EMQIRDWFNNKRRKIKKS	E_QISLWFPNKRQKIKKS	ECQISKWFVNKRSKIKKS	EFQIPTWFVNKRSKIKKS	ERQINQWFWNKRYKIKKS	ERQIATWFSNKRVKIKKS	EKQIVKWFDNKRWKIKKS	ERQIVKWFENKRFKIKKS	ERQIYFWFVNKRNKIKKS	ESQIRTWFSNKRPKIKKS	ELQIVYWFQNKRTKIKKS	ESQIKTWFQNKRAKIKKS	EEQIFYWFANKRRKIKKS	EEQISMWFRNKRRKIKKS	ELQIACWFLNKRLKIKKS	EIQISCWFSNKRRKIKKS	ESQIAQWFANKRRKIKKS	EEQILNWFSNKRKKIKKS	EMQIAQWFCNKRKKIKKS	EQQITNWFSNKRKKIKKS	ERQIFYWFANKRSKIKKS	EVQIRYWFCNKRRKIKKS	EKQISHWFENKRRKIKKS	ERQISNWFSNKRRKIKKS	ERQILLWFQNKRKKIKKS	ETQIANWFSNKRKKIKKS	ERQIICWFENKRRKIKKS	EPQIAYWFGNKRKKIKKS	ESQISRWFQNKRWKIKKS	ELQITRWFRNKRFKIKKS	ELQIARWFWNKRWKIKKS	ELQIMVWFRNKRFKIKKS	EYQITRWFQNKRRKIKKS		ELQIQDWFRNKRYKIKKS	EQQISDWFRNKRFKIKKS	ELQIMKWFDNKRQKIKKS	ESQITKWFNNKRSKIKKS	ERQINKWFENKRRKIKKS	EPQILKWFNNKRWKIKKS	ELQIRRWFENKRAKIKKS	EYQIRRWFGNKRSKIKKS	ESQILGWFTNKRVKIKKS	EMQILRWFGNKRYKIKKS	ERQIMVWFSNKRAKIKKS	EGQIRVWFSNKRAKIKKS
>147.256.AAA	>147.134.AAC	>147.278.AAG	>147.236.AAT	>147.263.ACA	>147.231.ACC	>147.148.ACG	>147.189.ACT	>147.248.AGA	>147.271.AGC	>147.271.AGG	>147.269.AGT	>147.266.ATA	>147.61.ATC	>147.257.ATG	>147.155.ATT	>147.106.CAA	>147.80.CAC	>147.469.CAG	>147.129.CAT	>147.188.CCA	>147.390.CCC	>147.279.CCG	>147.171.CCT	>147.347.CGA	>147.309.CGC	>147.83.CGG	>147.323.CGT	>147.300.CTA	>147.54.CTC	>147.23.CTG	>147.160.CTT	>147.77.GAA	>147.23.GAC	>147.88.GAG	>147.32.GAT	>147.39.GCA		>147.37.GCG	>147.34.GCT	>147.98.GGA	>147.29.GGC	>147.156.GGG	>147.96.GGT	>147.61.GTA	>147.43.GTC	>147.57.GTG	>147.105.GTT	>147.93.TAA	>147.99.TAC
EMQIASWFANKRFKIKKS	ERQITAWFRNKRFKIKKS	ERQIMQWFWNKRVKIKKS	ECQISSWFSNKRFKIKKS	ERQILTWFQNKRRKIKKS	EKQISSWFSNKRKKIKKS	EVQIMTWFQNKRNKIKKS	EVQIRNWFCNKRKKIKKS	EQQIFRWFANKRSKIKKS	ETQIRMWFSNKRVKIKKS	ERQIMKWFENKRMKIKKS	EKQIRKWFQNKRYKIKKS	EKQIMYWFANKRVKIKKS	ERQIRMWFANKRFKIKKS	ETQIVYWFQNKRNKIKKS	ERQIQVWFWNKRQKIKKS	EVQIGNWFSNKRRKIKKS	ELQIATWFSNKRRKIKKS	ESQISYWFWNKRRKIKKS	ERQILSWFSNKRRKIKKS	ERQIMNWFSNKRKKIKKS	ERQIGDWFSNKRKKIKKS	EPQIRDWFQNKRKKIKKS	ELQISNWFANKRKKIKKS	ERQISDWFSNKRRKIKKS	ESQIRMWFSNKRRKIKKS	EQQIARWFENKRRKIKKS	ESQIMNWFSNKRRKIKKS	ESQIMTWFANKRKKIKKS	EAQIYYWFQNKRRKIKKS	ECQIKYWFWNKRKKIKKS	EKQIYNWFSNKRKKIKKS	EGQIVRWFQNKRWKIKKS	ETQIERWFRNKRFKIKKS	ERQIACWFWNKRYKIKKS	EEQISVWFRNKRYKIKKS	EAQICKWFQNKRNKIKKS		EAQIGDWFRNKRAKIKKS	EPQIVRWFKNKRYKIKKS	EGQILKWFDNKRQKIKKS	EGQITKWFNNKREKIKKS	EEQINKWFENKRAKIKKS	EYQIMRWFDNKRQKIKKS	EFQILRWFQNKRMKIKKS	EAQIGKWFRNKRSKIKKS	ERQIAKWFENKRYKIKKS	EQQIMVWFRNKRYKIKKS	ERQILNWFSNKRAKIKKS	EEQIRVWFSNKRVKIKKS
>148.251.AAA	>148.134.AAC	>148.277.AAG	>148.227.AAT	>148.262.ACA	>148.227.ACC	>148.141.ACG	>148.188.ACT	>148.247.AGA	>148.270.AGC	>148.270.AGG	>148.265.AGT	>148.266.ATA	>148.59.ATC	>148.255.ATG	>148.155.ATT	>148.106.CAA	>148.80.CAC	>148.466.CAG	>148.129.CAT	>148.186.CCA	>148.390.CCC	>148.275.CCG	>148.168.CCT	>148.343.CGA	>148.309.CGC	>148.81.CGG	>148.321.CGT	>148.299.CTA	>148.53.CTC	>148.23.CTG	>148.160.CTT	>148.76.GAA	>148.23.GAC	>148.88.GAG	>148.32.GAT	>148.38.GCA		>148.37.GCG	>148.33.GCT	>148.97.GGA	>148.29.GGC	>148.150.GGG	>148.96.GGT	>148.61.GTA	>148.43.GTC	>148.56.GTG	>148.105.GTT	>148.92.TAA	>148.98.TAC
ELQIQYWFVNKRHKIKKS	ETQIATWFRNKRFKIKKS	EKQIMYWFNNKRHKIKKS	ERQIQSWFSNKRFKIKKS	EKQIMTWFHNKRTKIKKS	ERQIAMWFKNKRTKIKKS	EKQIKWWFENKRRKIKKS	ERQIKYWFENKRAKIKKS	EVQIFRWFANKRWKIKKS	EMQIVPWFTNKRTKIKKS	ERQIRKWFDNKRVKIKKS	ETQIAKWFENKRFKIKKS	ERQIAGWFSNKRGKIKKS	ERQIRMWFNNKRFKIKKS	EWQINVWFKNKRYKIKKS	ERQIVTWFQNKRNKIKKS	EMQIFNWFVNKRRKIKKS	EMQIAMWFRNKRRKIKKS	ENQISHWFWNKRRKIKKS	ELQISAWFSNKRRKIKKS	EQQIGNWFANKRKKIKKS	EQQIMTWFSNKRKKIKKS	EVQIVYWFENKRRKIKKS	EVQISNWFSNKRKKIKKS	EKQIHNWFSNKRRKIKKS	ESQIRDWFSNKRRKIKKS	EKQITRWFENKRRKIKKS	ESQITNWFSNKRRKIKKS	EQQIAYWFGNKRKKIKKS	EIQIRYWFGNKRKKIKKS	ERQIRFWFSNKRKKIKKS	EVQITYWFGNKRRKIKKS	EEQISRWFQNKRWKIKKS	EGQIGRWFRNKRFKIKKS	EAQISRWFWNKRYKIKKS	ESQIARWFLNKRYKIKKS	EKQIAKWFANKRVKIKKS		ERQIGDWFRNKRYKIKKS	ERQINLWFKNKRFKIKKS	ERQITKWFDNKRSKIKKS	EGQITKWFNNKRSKIKKS	ESQISKWFENKRRKIKKS	ESQIRKWFDNKRQKIKKS	EKQITRWFDNKRAKIKKS	EYQIRRWFGNKRAKIKKS	RRRSCSWFGNKRRKIKKS	EVQIRIWFANKRYKIKKS	EVQIRVWFCNKRAKIKKS	ERQIVIWFSNKRAKIKKS
>149.248.AAA	>149.133.AAC	>149.277.AAG	>149.225.AAT	>149.261.ACA	>149.226.ACC	>149.140.ACG	>149.186.ACT	>149.246.AGA	>149.269.AGC	>149.269.AGG	>149.262.AGT	>149.265.ATA	>149.57.ATC	>149.253.ATG	>149.155.ATT	>149.104.CAA	>149.80.CAC	>149.463.CAG	>149.128.CAT	>149.184.CCA	>149.390.CCC	>149.275.CCG	>149.163.CCT	>149.343.CGA	>149.307.CGC	>149.80.CGG	>149.320.CGT	>149.297.CTA	>149.53.CTC	>149.23.CTG	>149.159.CTT	>149.76.GAA	>149.23.GAC	>149.86.GAG	>149.31.GAT	>149.38.GCA		>149.36.GCG	>149.33.GCT	>149.96.GGA	>149.29.GGC	>149.148.GGG	>149.96.GGT	>149.60.GTA	>149.43.GTC	>149.55.GTG	>149.104.GTT	>149.91.TAA	>149.98.TAC
EKQIMAWFANKRFKIKKS	ERQIASWFRNKRFKIKKS	ERQILQWFWNKRFKIKKS	RRRQQLSSELGLTKIKKS	EKQIYNWFHNKRTKIKKS	ERQILNWFQNKRKKIKKS	EKQITYWFDNKRRKIKKS	EKQISAWFHNKRMKIKKS	EKQINVWFWNKRYKIKKS	EKQIMRWFNNKRVKIKKS	ERQISKWFENKRSKIKKS	EKQIRRWFENKRFKIKKS	ETQILDWFWNKRSKIKKS	EVQIRMWFANKRYKIKKS	EVQIIYWFQNKRWKIKKS	ERQITVWFQNKRSKIKKS	EAQIGMWFANKRRKIKKS	ELQINDWFRNKRRKIKKS	ELQIQSWFWNKREKIKKS	EMQILNWFSNKRRKIKKS	EKQILQWFANKRKKIKKS	ESQISDWFSNKRKKIKKS	EVQIGNWFQNKRKKIKKS	ERQINNWFGNKRKKIKKS	ESQIFHWFANKRSKIKKS	ETQIAHWFSNKRRKIKKS	ERQIVCWFENKRRKIKKS	ESQINNWFSNKRRKIKKS	EKQISFWFANKRKKIKKS	ERQIGMWFANKRKKIKKS	EKQILDWFQNKRKKIKKS	EKQISFWFGNKRKKIKKS	EKQILRWFQNKRDKIKKS	EYQIIRWFRNKRWKIKKS	ERQIMQWFWNKRSKIKKS	EWQIGRWFLNKRYKIKKS	ESQIMKWFANKRAKIKKS		ERQIVDWFRNKRYKIKKS	EKQITAWFKNKRFKIKKS	EEQIRKWFDNKRFKIKKS	EVQITKWFNNKRYKIKKS	EHQISKWFENKRRKIKKS	EKQIGKWFDNKRMKIKKS	EQQIGKWFQNKRSKIKKS	ERQILKWFSNKRGKIKKS	EDQINLWFNNKR_KIKKS	ELQITKWFANKRFKIKKS	ESQIRIWFANKRAKIKKS	EEQIRVWFSNKRAKIKKS
>150.248.AAA	>150.133.AAC	>150.276.AAG	>150.222.AAT	>150.257.ACA	>150.220.ACC	>150.140.ACG	>150.186.ACT	>150.245.AGA	>150.264.AGC	>150.267.AGG	>150.262.AGT	>150.262.ATA	>150.56.ATC	>150.253.ATG	>150.154.ATT	>150.104.CAA	>150.79.CAC	>150.463.CAG	>150.128.CAT	>150.184.CCA	>150.387.CCC	>150.274.CCG	>150.162.CCT	>150.341.CGA	>150.303.CGC	>150.80.CGG	>150.312.CGT	>150.293.CTA	>150.53.CTC	>150.22.CTG	>150.158.CTT	>150.76.GAA	>150.23.GAC	>150.84.GAG	>150.31.GAT	>150.36.GCA		>150.36.GCG	>150.33.GCT	>150.96.GGA	>150.29.GGC	>150.147.GGG	>150.95.GGT	>150.60.GTA	>150.43.GTC	>150.55.GTG	>150.104.GTT	>150.91.TAA	>150.98.TAC
EGQISSWFANKRFKIKKS	EAQICSWFRNKRHKIKKS	EGQIVRWFANKRLKIKKS	ERQITSWFSNKRFKIKKS	ERQIHYWFHNKRTKIKKS	EMQIKNWFQNKRKKIKKS	EVQISVWFPNKRRKIKKS	EKQIVSWFHNKRMKIKKS	ETQIFRWFANKRFKIKKS	EVQITRWFNNKRVKIKKS	EKQIKKWFENKRQKIKKS	ERQINKWFENKRHKIKKS	ERQILYWFNNKRSKIKKS	E_QITVWFLNKRGKIKKS	ETQIMYWFQNKRWKIKKS	ERQIHVWFQNKRAKIKKS	EPQIMYWFQNKRRKIKKS	ECQIGMWFRNKRRKIKKS	EMQISHWFWNKRRKIKKS	EKQILQWFSNKRRKIKKS	EVQITNWFANKRKKIKKS	ELQIMTWFSNKRKKIKKS	ERQITYWFENKRRKIKKS	EAQIANWFSNKRKKIKKS	ELQISYWFANKRAKIKKS	EVQIRNWFSNKRRKIKKS	ETQISRWFENKRRKIKKS	ETQISYWFSNKRRKIKKS	EAQITAWFANKRRKIKKS	EMQIRFWFANKRKKIKKS	EKQIVYWFENKRRKIKKS	EVQIQWWFANKRKKIKKS	EWQIARWFSNKRYKIKKS	EHQIERWFRNKRFKIKKS	EMQITRWFWNKRYKIKKS	ESQIRVWFSNKRYKIKKS	ETQICRWFQNKRQKIKKS		ERQIVDWFRNKRFKIKKS	EQQILDWFRNKRFKIKKS	EKQITKWFDNKRMKIKKS	EHQIMKWFNNKRQKIKKS	EGQILKWFENKRYKIKKS	ERQIMKWFDNKRVKIKKS	ESQIGKWFQNKRGKIKKS	EWQISKWFKNKRYKIKKS	EAQILRWFENKRYKIKKS	ERQITQWFANKRFKIKKS	EAQISVWFANKRAKIKKS	EQQIRVWFSNKRVKIKKS
>151.248.AAA	>151.133.AAC	>151.276.AAG	>151.219.AAT	>151.257.ACA	>151.219.ACC	>151.138.ACG	>151.182.ACT	>151.241.AGA	>151.259.AGC	>151.266.AGG	>151.262.AGT	>151.262.ATA	>151.55.ATC	>151.253.ATG	>151.154.ATT	>151.104.CAA	>151.79.CAC	>151.462.CAG	>151.127.CAT	>151.183.CCA	>151.387.CCC	>151.274.CCG	>151.161.CCT	>151.339.CGA	>151.296.CGC	>151.79.CGG	>151.305.CGT	>151.292.CTA	>151.51.CTC	>151.22.CTG	>151.156.CTT	>151.75.GAA	>151.23.GAC	>151.84.GAG	>151.31.GAT	>151.36.GCA		>151.36.GCG	>151.33.GCT	>151.96.GGA	>151.29.GGC	>151.146.GGG	>151.95.GGT	>151.60.GTA	>151.43.GTC	>151.55.GTG	>151.104.GTT	>151.90.TAA	>151.97.TAC
EKQIIVWFANKRWKIKKS	EMQINSWFRNKRHKIKKS	ERQIMQWFWNKRAKIKKS	EVQITGWFRNKRSKIKKS	EKQISQWFQNKRRKIKKS	ERQITMWFANKRKKIKKS	ELQIKRWFENKRRKIKKS	EKQIYRWFGNKRWKIKKS	EQQIFRWFANKRNKIKKS	ERQIRDWFRNKRMKIKKS	ERQISKWFENKRSKIKKS	EQQITRWFENKRYKIKKS	PQIDEWFRNQGKQKIKKS	EVQIRMWFANKRWKIKKS	EVQITYWFQNKRHKIKKS	EQQIRVWFQNKRGKIKKS	EGQIAQWFANKRRKIKKS	EQQIAMWFRNKRRKIKKS	EGQIGKWFFNKRRKIKKS	EKQILQWFSNKRRKIKKS	ELQISYWFQNKRKKIKKS	ERQILDWFHNKRKKIKKS	EQQIVYWFENKRRKIKKS	ERQILDWFSNKRKKIKKS	EAQIGYWFGNKRRKIKKS	EKQIVVWFNNKRRKIKKS	EVQICRWFENKRRKIKKS	ERQITDWFGNKRKKIKKS	EMQITYWFSNKRKKIKKS	EFQILRWFANKRRKIKKS	EKQIVCWFQNKRRKIKKS	EKQIRLWFANKRKKIKKS	ERQISRWFQNKRHKIKKS	ELQIGRWFRNKRWKIKKS	EKQIARWFWNKRWKIKKS	EMQIAVWFRNKRWKIKKS	EEQIAKWFQNKRAKIKKS		EAQILDWFRNKRYKIKKS	EGQINVWFKNKRYKIKKS	ELQIYSWFTNKRYKIKKS	ETQITKWFNNKRLKIKKS	EKQISKWFENKRRKIKKS	EKQISKWFDNKRQKIKKS	EWQILKWFQNKRAKIKKS	ERQISKWFRNKRCKIKKS	ESQIMAWFQNKRYKIKKS	EGQIAKWFANKRWKIKKS	ESQIA_WFTNKRLKIKKS	EAQIRVWFSNKRAKIKKS
>152.246.AAA	>152.132.AAC	>152.271.AAG	>152.218.AAT	>152.255.ACA	>152.219.ACC	>152.137.ACG	>152.178.ACT	>152.239.AGA	>152.259.AGC	>152.264.AGG	>152.261.AGT	>152.262.ATA	>152.55.ATC	>152.250.ATG	>152.153.ATT	>152.103.CAA	>152.79.CAC	>152.462.CAG	>152.127.CAT	>152.182.CCA	>152.386.CCC	>152.272.CCG	>152.160.CCT	>152.334.CGA	>152.292.CGC	>152.79.CGG	>152.305.CGT	>152.291.CTA	>152.51.CTC	>152.21.CTG	>152.154.CTT	>152.74.GAA	>152.23.GAC	>152.83.GAG	>152.31.GAT	>152.36.GCA		>152.36.GCG	>152.33.GCT	>152.95.GGA	>152.29.GGC	>152.144.GGG	>152.95.GGT	>152.60.GTA	>152.43.GTC	>152.54.GTG	>152.103.GTT	>152.90.TAA	>152.97.TAC
ERQITGWFANKRHKIKKS	ERQISQWFRNKRCKIKKS	ERQIMQWFWNKRSKIKKS	ELQISQWFCNKRFKIKKS	ERQIRDWFQNKRRKIKKS	ESQIMSWFHNKRSKIKKS	EMQIKAWFKNKRYKIKKS	EKQIISWFHNKRMKIKKS	ETQIFRWFANKRSKIKKS	EQQIRRWFSNKRVKIKKS	ERQILKWFENKRAKIKKS	ERQIKKWFENKRQKIKKS	ERQIAQWFANKRTKIKKS	ECQIASWFHNKRYKIKKS	EVQISTWFQNKRSKIKKS	EMQIKTWFQNKRAKIKKS	ETQIYYWFVNKRRKIKKS	ELQIMIWFRNKRRKIKKS	EKQIMHWFWNKRRKIKKS	ERQIMSWFSNKRRKIKKS	ELQIMYWFQNKRKKIKKS	EKQIMTWFNNKRKKIKKS	ERQIADWFQNKRKKIKKS	ERQISDWFANKRKKIKKS	EMQIFHWFSNKRKKIKKS	ETQIRLWFSNKRRKIKKS	ELQIRRWFENKRRKIKKS	ESQIANWFMNKRRKIKKS	ELQIVYWFQNKRRKIKKS	EGQIGPWFPNKRFKIKKS	ETQIRDWFQNKRRKIKKS	EVQIVYWFGNKRRKIKKS	ESQISRWFQNKRFKIKKS	EGQIARWFRNKRWKIKKS	ELQIARWFWNKRYKIKKS	EGQIARWFLNKRYKIKKS	ELQIAVWFHNKRRKIKKS		EPQISDWFRNKRFKIKKS	ETQIMDWFRNKRFKIKKS	EEQISKWFDNKRYKIKKS	EVQIEGWFINKRDKIKKS	ESQIMKWFENKRRKIKKS	ERQINKWFDNKRYKIKKS	ELQIVRWFQNKRMKIKKS	EMQIAKWFRNKRWKIKKS	EVQIQRWFENKRYKIKKS	EMQISKWFANKRWKIKKS	EPQISVWFANKRAKIKKS	EHQIRLWFSNKRYKIKKS
>153.245.AAA	>153.131.AAC	>153.270.AAG	>153.214.AAT	>153.254.ACA	>153.218.ACC	>153.137.ACG	>153.178.ACT	>153.239.AGA	>153.256.AGC	>153.259.AGG	>153.258.AGT	>153.262.ATA	>153.52.ATC	>153.250.ATG	>153.153.ATT	>153.103.CAA	>153.79.CAC	>153.461.CAG	>153.127.CAT	>153.182.CCA	>153.385.CCC	>153.271.CCG	>153.160.CCT	>153.333.CGA	>153.289.CGC	>153.77.CGG	>153.300.CGT	>153.289.CTA	>153.51.CTC	>153.21.CTG	>153.153.CTT	>153.74.GAA	>153.23.GAC	>153.83.GAG	>153.31.GAT	>153.35.GCA		>153.36.GCG	>153.33.GCT	>153.95.GGA	>153.29.GGC	>153.142.GGG	>153.95.GGT	>153.60.GTA	>153.43.GTC	>153.54.GTG	>153.103.GTT	>153.89.TAA	>153.97.TAC
ERQIHYWFVNKRWKIKKS	ESQISGWFRNKRFKIKKS	ERQIRQWFWNKRWKIKKS	EKQITSWFSNKRFKIKKS	EKQIKNWFNNKRRKIKKS	EKQIRYWFENKRRKIKKS	EKQIKRWFENKRRKIKKS	EKQIAYWFHNKRVKIKKS	EMQIHRWFANKRWKIKKS	EVQITYWFLNKRPKIKKS	EKQIMKWFENKRGKIKKS	EQQIKKWFENKRWKIKKS	EKQIVVWFNNKRVKIKKS	ESQIPWWFYNKRLKIKKS	ERQIMTWFQNKRTKIKKS	EKQIKVWFQNKRSKIKKS	ELQIFNWFANKRRKIKKS	EMQIGMWFRNKRRKIKKS	EYQIYVWFVNKRSKIKKS	EHQIAQWFSNKRRKIKKS	EGQIRTWFQNKRKKIKKS	EAQIAMWFSNKRKKIKKS	ELQIRYWFENKRKKIKKS	EKQITNWFGNKRKKIKKS	ERQILFWFQNKRAKIKKS	ELQIAYWFSNKRRKIKKS	EVQIRYWFENKRRKIKKS	EVQISYWFSNKRRKIKKS	ERQIQYWFANKRKKIKKS	ELQIRFWFGNKRKKIKKS	EQQIRNWFQNKRKKIKKS	EVQIGWWFGNKRKKIKKS	EAQIFHWFKNKRMKIKKS	EGQIQRWFRNKRWKIKKS	EVQINRWFWNKRYKIKKS	EFQIAVWFRNKRYKIKKS	ERQIMDWFRNKRQKIKKS		EGQILDWFRNKRYKIKKS	EKQIVTWFKNKRFKIKKS	EAQISKWFDNKRFKIKKS	EKQICKWFNNKRSKIKKS	ERQINKWFENKRRKIKKS	ETQISKWFNNKRVKIKKS	EKQILRWFQNKRMKIKKS	EVQIVRWFGNKRYKIKKS	ESQIMRWFENKRYKIKKS	ELQIVRWFANKRFKIKKS	ERQIAIWFVNKRVKIKKS	ETQIRLWFSNKRAKIKKS
>154.245.AAA	>154.131.AAC	>154.265.AAG	>154.209.AAT	>154.254.ACA	>154.218.ACC	>154.136.ACG	>154.176.ACT	>154.239.AGA	>154.254.AGC	>154.258.AGG	>154.257.AGT	>154.261.ATA	>154.51.ATC	>154.249.ATG	>154.150.ATT	>154.103.CAA	>154.79.CAC	>154.460.CAG	>154.127.CAT	>154.181.CCA	>154.382.CCC	>154.269.CCG	>154.156.CCT	>154.332.CGA	>154.288.CGC	>154.77.CGG	>154.290.CGT	>154.289.CTA	>154.49.CTC	>154.21.CTG	>154.153.CTT	>154.74.GAA	>154.23.GAC	>154.83.GAG	>154.31.GAT	>154.35.GCA		>154.36.GCG	>154.32.GCT	>154.93.GGA	>154.28.GGC	>154.141.GGG	>154.94.GGT	>154.60.GTA	>154.42.GTC	>154.53.GTG	>154.103.GTT	>154.88.TAA	>154.96.TAC
ERQIASWFANKRFKIKKS	ERQISSWFRNKRFKIKKS	ERQISQWFWNKRFKIKKS	ELQISQWFVNKRYKIKKS	EKQIVNWFNNKRRKIKKS	ERQIKQWFENKRKKIKKS	ERQIIHWFENKRRKIKKS	EKQIKYWFENKRAKIKKS	ERQISSWFSNKRVKIKKS	ELQIRQWFSNKRTKIKKS	ESQIHKWFENKRYKIKKS	ESQILKWFENKRFKIKKS	ERQIMYWFQNKRHKIKKS	ERQIASWFANKRAKIKKS	EVQICYWFQNKRHKIKKS	EGQIKTWFQNKRMKIKKS	ERQIHHWFSNKRRKIKKS	ELQIAYWFSNKRRKIKKS	EDQISWWFWNKRRKIKKS	ELQIYNWFSNKRRKIKKS	EQQITDWFANKRKKIKKS	EVQIANWFSNKRKKIKKS	EKQISNWFWNKRKKIKKS	ERQILTWFSNKRKKIKKS	ELQISYWFGNKRRKIKKS	ERQISYWFSNKRRKIKKS	EAQITHWFENKRRKIKKS	EVQITYWFNNKRRKIKKS	ERQITMWFQNKRKKIKKS	ELQIRYWFANKRKKIKKS	ERQISNWFQNKRKKIKKS	EMQIVNWFGNKRKKIKKS	EVQISGWFKNKRYKIKKS	EGQINKWFRNKRWKIKKS	EIQIIRWFWNKRYKIKKS	EFQIAVWFRNKRYKIKKS	EKQIGRWFQNKRAKIKKS		EFQIADWFRNKRYKIKKS	ECQILNWFRNKRFKIKKS	ERQISKWFDNKRQKIKKS	ENQIAKWFNNKRQKIKKS	EAQIAKWFENKRRKIKKS	ERQISKWFDNKRIKIKKS	ETQIARWFQNKRLKIKKS	ELQIMKWFRNKRWKIKKS	ERQICKWFENKRYKIKKS	EKQITKWFANKRSKIKKS	EYQIKIWFRNKRAKIKKS	EEQIRVWFSNKRSKIKKS
>155.245.AAA	>155.131.AAC	>155.263.AAG	>155.208.AAT	>155.253.ACA	>155.216.ACC	>155.134.ACG	>155.172.ACT	>155.238.AGA	>155.253.AGC	>155.253.AGG	>155.257.AGT	>155.261.ATA	>155.51.ATC	>155.248.ATG	>155.150.ATT	>155.103.CAA	>155.79.CAC	>155.460.CAG	>155.126.CAT	>155.180.CCA	>155.380.CCC	>155.265.CCG	>155.156.CCT	>155.332.CGA	>155.283.CGC	>155.76.CGG	>155.289.CGT	>155.288.CTA	>155.49.CTC	>155.21.CTG	>155.152.CTT	>155.74.GAA	>155.23.GAC	>155.82.GAG	>155.30.GAT	>155.35.GCA		>155.36.GCG	>155.32.GCT	>155.93.GGA	>155.28.GGC	>155.141.GGG	>155.94.GGT	>155.60.GTA	>155.42.GTC	>155.53.GTG	>155.102.GTT	>155.88.TAA	>155.96.TAC
EIQIITWFPNKRMKIKKS	EVQICAWFRNKRHKIKKS	ENQIKQWFWNKRYKIKKS	ETQIQTWFSNKRFKIKKS	EPQIRNWFNNKRRKIKKS	EKQIAYWFHNKRVKIKKS	ESQITRWFENKRRKIKKS	EKQIVSWFHNKRQKIKKS	EQQIRYWFNNKRAKIKKS	ELQIHRWFKNKRYKIKKS	EKQIRTWFRNKRVKIKKS	EQQIRKWFENKRWKIKKS	EKQIGSWFSNKRAKIKKS	EEQILVWFSNKRIKIKKS	EVQICTWFSNKRQKIKKS	EQQIRVWFQNKRRKIKKS	EVQIMCWFANKRRKIKKS	EPQISMWFRNKRRKIKKS	EVQISWWFWNKRRKIKKS	EVQITMWFSNKRRKIKKS	EPQIQTWFQNKRKKIKKS	EEQICNWFSNKRKKIKKS	EKQICDWFQNKRKKIKKS	ENQIANWFSNKRKKIKKS	EYQIFNWFANKRRKIKKS	EVQIRYWFSNKRKKIKKS	EYQIVHWFENKRRKIKKS	EPQISNWFSNKRRKIKKS	EVQISNWFSNKRKKIKKS	ELQIRYWFSNKRRKIKKS	EKQIKYWFWNKRKKIKKS	ETQIMHWFGNKRKKIKKS	EWQIARWFQNKRWKIKKS	EKQIARWFRNKRFKIKKS	ELQISQWFWNKRYKIKKS	EVQIMKWFVNKRYKIKKS	EKQILRWFQNKRMKIKKS		EGQIVVWFKNKRYKIKKS	ECQIGDWFRNKRYKIKKS	EKQILKWFDNKRVKIKKS	ETQIQKWFNNKRQKIKKS	EKQILKWFENKRRKIKKS	EGQIMKWFSNKRGKIKKS	EYQIARWFQNKRIKIKKS	ERQIMRWFGNKRAKIKKS	ERQIMRWFENKRFKIKKS	EMQITRWFSNKRAKIKKS	ETQIATWFVNKRAKIKKS	ENQIRVWFSNKRVKIKKS
>156.242.AAA	>156.131.AAC	>156.262.AAG	>156.208.AAT	>156.251.ACA	>156.216.ACC	>156.132.ACG	>156.170.ACT	>156.237.AGA	>156.253.AGC	>156.248.AGG	>156.256.AGT	>156.261.ATA	>156.50.ATC	>156.246.ATG	>156.148.ATT	>156.103.CAA	>156.78.CAC	>156.458.CAG	>156.126.CAT	>156.179.CCA	>156.376.CCC	>156.264.CCG	>156.156.CCT	>156.330.CGA	>156.278.CGC	>156.75.CGG	>156.288.CGT	>156.283.CTA	>156.49.CTC	>156.21.CTG	>156.149.CTT	>156.74.GAA	>156.23.GAC	>156.80.GAG	>156.30.GAT	>156.34.GCA		>156.35.GCG	>156.32.GCT	>156.92.GGA	>156.28.GGC	>156.135.GGG	>156.94.GGT	>156.60.GTA	>156.42.GTC	>156.52.GTG	>156.102.GTT	>156.88.TAA	>156.96.TAC
ERQIHYWFVNKRSKIKKS	ERQISGWFRNKRFKIKKS	EKQITQWFWNRRFKIKKS	ESQISSWFSNKRFKIKKS	EKQIRWWFDNKRRKIKKS	ERQIANWFHNKRTKIKKS	ELQIVHWFENKRRKIKKS	EKQIRYWFQNKRNKIKKS	ERQIRRWFENKRWKIKKS	ELQILSWFSNKRGKIKKS	ERQIAKWFQNKRDKIKKS	EKQIRKWFENKRLKIKKS	ERQISSWFANKRVKIKKS	EGQIRRWFSNKRVKIKKS	ESQITYWFQNKRFKIKKS	ESQIGQWFGNKRRKIKKS	EMQILYWFQNKRRKIKKS	EKQIMDWFRNKRRKIKKS	EVQIMNWFSNKRSKIKKS	ERQIGSWFSNKRRKIKKS	EQQITFWFQNKRKKIKKS	EIQIMYWFSNKRKKIKKS	ERQIQNWFENKRKKIKKS	ERQIVDWFHNKRRKIKKS	ETQISYWFANKRAKIKKS	EVQIMYWFSNKRRKIKKS	EWQINGWFPNKRRKIKKS	ESQINNWFSNKRRKIKKS	ELQIMWWFSNKRKKIKKS	EMQIQYWFSNKRKKIKKS	EKQIVYWFENKRRKIKKS	ERQISFWFGNKRAKIKKS	EGQIMRWFQNKRWKIKKS	EGQIMRWFRNKRWKIKKS	ECQISRWFWNKRYKIKKS	EEQIAKWFVNKRWKIKKS	EPQILKWFQNKRRKIKKS		EQQITDWFRNKRFKIKKS	EMQISDWFRNKRYKIKKS	ELQISKWFDNKRTKIKKS	EWQIMKWFNNKRVKIKKS	EGQILKWFENKRAKIKKS	EAQIMKWFDNKRYKIKKS	ESQIMRWFQNKRSKIKKS	EGQIISWFWNKRGKIKKS	EKQIGRWFENKRYKIKKS	EKQITKWFANKRAKIKKS	ERQITLWFSNKRAKIKKS	EKQITIWFSNKRAKIKKS
>157.242.AAA	>157.129.AAC	>157.262.AAG	>157.206.AAT	>157.251.ACA	>157.215.ACC	>157.131.ACG	>157.170.ACT	>157.237.AGA	>157.251.AGC	>157.247.AGG	>157.256.AGT	>157.261.ATA	>157.50.ATC	>157.245.ATG	>157.147.ATT	>157.103.CAA	>157.78.CAC	>157.455.CAG	>157.126.CAT	>157.179.CCA	>157.370.CCC	>157.256.CCG	>157.153.CCT	>157.329.CGA	>157.276.CGC	>157.74.CGG	>157.273.CGT	>157.283.CTA	>157.48.CTC	>157.21.CTG	>157.147.CTT	>157.73.GAA	>157.23.GAC	>157.80.GAG	>157.30.GAT	>157.34.GCA		>157.35.GCG	>157.32.GCT	>157.91.GGA	>157.27.GGC	>157.135.GGG	>157.93.GGT	>157.60.GTA	>157.42.GTC	>157.52.GTG	>157.102.GTT	>157.87.TAA	>157.95.TAC
EKQIGTWFANKRHKIKKS	ERQICSWFRNKRFKIKKS	EKQILQWFWNKRYKIKKS	ERQILQWFSNKRHKIKKS	ERQIKNWFDNKRRKIKKS	EQQIKYWFENKRKKIKKS	ERQIRRWFENKRRKIKKS	ETQIANWFHNKRVKIKKS	ERQIRQWFWNKRYKIKKS	EVQIRYWFSNKRTKIKKS	EVQIARWFKNKRLKIKKS	EKQIRKWFENKRSKIKKS	EKQILCWFANKRQKIKKS	EPQITYWFQNKRSKIKKS	EMQIVYWFQNKRHKIKKS	ERQIRVWFQNKRGKIKKS	ELQITYWFQNKRRKIKKS	EVQIMMWFRNKRRKIKKS	EAQISIWFRNKRLKIKKS	EKQILGWFSNKRRKIKKS	ELQIFYWFCNKRKKIKKS	ETQIGHWFENKRRKIKKS	EKQIRYWFENKRRKIKKS	ELQISNWFSNKRKKIKKS	ESQIFYWFANKRAKIKKS	EKQINMWFSNKRRKIKKS	ESQIRRWFENKRRKIKKS	EVQIRHWFSNKRRKIKKS	ERQIMMWFQNKRKKIKKS	EMQIQYWFGNKRKKIKKS	ETQIRYWFENKRKKIKKS	ERQILMWFSNKRKKIKKS	EGQISHWFKNKRYKIKKS	ERQIDRWFRNKRWKIKKS	ERQITRWFWNKRYKIKKS	EYQISVWFRNKRYKIKKS	ETQIARWFQNKRQKIKKS		EKQIEDWFRNKRYKIKKS	EWQIVGWFKNKRYKIKKS	EKQISKWFDNKRQKIKKS	ECQITKWFNNKRMKIKKS	EVQIAKWFENKRSKIKKS	ETQISKWFDNKRQKIKKS	EVQIYNWFRNKRLKIKKS	EYQILRWFSNKRAKIKKS	EVQIVRWFENKRYKIKKS	EKQIRSWFANKRYKIKKS	ERQITLWFRNKRAKIKKS	ETQIRVWFSNKRAKIKKS
>158.242.AAA	>158.129.AAC	>158.262.AAG	>158.205.AAT	>158.251.ACA	>158.210.ACC	>158.130.ACG	>158.167.ACT	>158.236.AGA	>158.248.AGC	>158.247.AGG	>158.256.AGT	>158.259.ATA	>158.49.ATC	>158.238.ATG	>158.145.ATT	>158.102.CAA	>158.78.CAC	>158.448.CAG	>158.125.CAT	>158.179.CCA	>158.369.CCC	>158.248.CCG	>158.153.CCT	>158.327.CGA	>158.276.CGC	>158.74.CGG	>158.271.CGT	>158.282.CTA	>158.48.CTC	>158.21.CTG	>158.146.CTT	>158.73.GAA	>158.23.GAC	>158.79.GAG	>158.30.GAT	>158.34.GCA		>158.35.GCG	>158.32.GCT	>158.91.GGA	>158.27.GGC	>158.131.GGG	>158.93.GGT	>158.60.GTA	>158.42.GTC	>158.51.GTG	>158.102.GTT	>158.84.TAA	>158.95.TAC
EKQITYWFVNKRAKIKKS	EGQIMQWFRNKRFKIKKS	EHQILQWFWNKRHKIKKS	EKQISAWFSNKRHKIKKS	EKQIISWFHNKRSKIKKS	EKQIRNWFQNKRKKIKKS	ERQISHWFENKRRKIKKS	EKQIGCWFHNKRTKIKKS	EVQIFRWFANKRFKIKKS	EEQIRRWFNNKRVKIKKS	EKQISKWFENKRRKIKKS	ELQIKKWFENKRFKIKKS	ERQIYYWFCNKRSKIKKS	ELQIELWFSNKRLKIKKS	EKQIMYWFQNKRHKIKKS	EQQIRIWFQNKRSKIKKS	ECQISMWFANKRRKIKKS	ELQIHYWFSNKRRKIKKS	ESQINHWFWNKRRKIKKS	EHQIMQWFSNKRRKIKKS	EKQICTWFQNKRKKIKKS	ELQIVNWFSNKRKKIKKS	ERQIVNWFQNKRKKIKKS	ETQIVNWFSNKRKKIKKS	EKQIMYWFGNKRSKIKKS	EVQIQNWFSNKRRKIKKS	ERQIINWFSNKRLKIKKS	ENQISYWFSNKRRKIKKS	EAQICWWFGNKRKKIKKS	ERQILMWFSNKRRKIKKS	EKQITYWFWNKRRKIKKS	ERQIVYWFANKRAKIKKS	ELQIIGWFKNKRYKIKKS	EGQISRWFRNKRWKIKKS	ELQIMRWFWNKRWKIKKS	ENQIGRWFINKRYKIKKS	ERQIGRWFQNKRAKIKKS		ERQIIDWFRNKRFKIKKS	EAQIQDWFRNKRYKIKKS	ERQIAKWFDNKRVKIKKS	ESQIRKWFSNKRTKIKKS	EEQIRKWFENKRWKIKKS	EVQISKWFNNKRMKIKKS	ERQIVRWFDNKRYKIKKS	EFQIVTWF_NKRKKIKKS	ELQITRWFENKRYKIKKS	ERQITKWFANKRWKIKKS	EHQIQIWFQNKRAKIKKS	ETQIRIWFSNKRAKIKKS
>159.241.AAA	>159.129.AAC	>159.258.AAG	>159.203.AAT	>159.251.ACA	>159.209.ACC	>159.128.ACG	>159.160.ACT	>159.236.AGA	>159.247.AGC	>159.247.AGG	>159.255.AGT	>159.258.ATA	>159.49.ATC	>159.227.ATG	>159.144.ATT	>159.101.CAA	>159.78.CAC	>159.436.CAG	>159.124.CAT	>159.177.CCA	>159.368.CCC	>159.247.CCG	>159.153.CCT	>159.326.CGA	>159.275.CGC	>159.73.CGG	>159.271.CGT	>159.279.CTA	>159.48.CTC		>159.145.CTT	>159.73.GAA	>159.23.GAC	>159.77.GAG	>159.30.GAT	>159.34.GCA		>159.35.GCG	>159.32.GCT	>159.90.GGA	>159.27.GGC	>159.131.GGG	>159.92.GGT	>159.60.GTA	>159.42.GTC	>159.51.GTG	>159.101.GTT	>159.84.TAA	>159.95.TAC
ERQISAWFANKRHKIKKS	EQQISSWFRNKRFKIKKS	EVQIMQWFWNKRYKIKKS	EKQIAGWFNNKRFKIKKS	EEQIKNWFNNKRRKIKKS	ERQIANWFHNKRTKIKKS	EIQIRYWFDNKRRKIKKS	ERQIAGWFYNKREKIKKS	ERQIRVWFWNKRYKIKKS	EVQISRWFNNKRVKIKKS	EPQIPPWFTNKRLKIKKS	EKQILKWFENKRWKIKKS	ERQIRTWFCNKRAKIKKS	ESQIAQWFRNKRNKIKKS	ERQILYWFQNKRHKIKKS	ELQIKFWFQNKRQKIKKS	ETQIADWFANKRRKIKKS	EGQIRQWFSNKRRKIKKS	EQQIPGWFRNKRGKIKKS	EVQISSWFSNKRRKIKKS	EVQISNWFANKRKKIKKS	ERQILDWFSNKRKKIKKS	ERQITDWFQNKRRKIKKS	ERQITDWFHNKRRKIKKS	ELQIFHWFANKRRKIKKS	ENQIMHWFSNKRRKIKKS	ESQLRRWFENKRRKIKKS	EKQISNWFGNKRMKIKKS	EPQIAYWFANKRRKIKKS	ETQIRNWFTNKRRKIKKS		EKQIQHWFGNKRRKIKKS	EHQIMHWFKNKRWKIKKS	EVQITRWFRNKRFKIKKS	EQQIKVWFWNKRYKIKKS	EVQITRWFNNKRYKIKKS	EAQITRWFQNKRMKIKKS		ETQIGDWFRNKRYKIKKS	ERQIMAWFKNKRFKIKKS	EKQIQKWFDNKRYKIKKS	ENQILKWFNNKRSKIKKS	EKQIMKWFENKRIKIKKS	ERQIDKWFDNKRYKIKKS	ETQISRWFQNKRLKIKKS	EGQIRRWFGNKRAKIKKS	ESQILRWFENKRYKIKKS	EVQIVRWFANKRFKIKKS	ERQIMVWFSNKRSKIKKS	ESQIRVWFSNKRAKIKKS
>160.241.AAA	>160.128.AAC	>160.258.AAG	>160.202.AAT	>160.249.ACA	>160.207.ACC	>160.127.ACG	>160.159.ACT	>160.236.AGA	>160.246.AGC	>160.244.AGG	>160.254.AGT	>160.258.ATA	>160.48.ATC	>160.226.ATG	>160.144.ATT	>160.100.CAA	>160.78.CAC	>160.433.CAG	>160.123.CAT	>160.177.CCA	>160.364.CCC	>160.243.CCG	>160.151.CCT	>160.325.CGA	>160.275.CGC	>160.73.CGG	>160.270.CGT	>160.278.CTA	>160.46.CTC		>160.145.CTT	>160.73.GAA	>160.23.GAC	>160.77.GAG	>160.30.GAT	>160.33.GCA		>160.35.GCG	>160.32.GCT	>160.90.GGA	>160.26.GGC	>160.131.GGG	>160.92.GGT	>160.60.GTA	>160.41.GTC	>160.51.GTG	>160.101.GTT	>160.83.TAA	>160.95.TAC
ERQIYFWFVNKRHKIKKS	ESQIASWFRNKRFKIKKS	ETQIMQWFWNKRWKIKKS	EKQIATWFLNKRHKIKKS	EVQIANWFNNKRRKIKKS	ESQIATWFSNKRKKIKKS	EHQIRRWFLNKRYKIKKS	ELQIVYWFHNKRMKIKKS	EKQIKRWFENKRWKIKKS	ERQIARWFNNKRVKIKKS	R_QICLWFKNKRKKIKKS	EQQIRKWFENKRYKIKKS	EMQIKVWFQNKRWKIKKS	EWQIASWFHNKRNKIKKS	E_QINYWFWNKRRKIKKS	ESQIRIWFQNKRQKIKKS	ERQIADWFSNKRRKIKKS	EEQIGMWFRNKRRKIKKS	ERQIMHWFWNKRRKIKKS	ERQILQWFSNKRRKIKKS	ERQIMDWFANKRKKIKKS	ESQIRNWFHNKRKKIKKS	ERQITYWFENKRRKIKKS	EKQILDWFSNKRKKIKKS	ESQIRYWFANKRAKIKKS	ENQIRDWFSNKRRKIKKS	ESQITRWFENKRRKIKKS	ELQIYYWFSNKRAKIKKS	EVQIFNWFANKRKKIKKS	EKQIRMWFSNKRRKIKKS		ELQIIYWFSNKRKKIKKS	ERQIHNWFKNKRWKIKKS	EEQITRWFRNKRWKIKKS	ERQIAQWFWNKRYKIKKS	ELQIQVWFRNKRYKIKKS	EFQIFKWFANKRFKIKKS		ETQISDWFRNKRAKIKKS	ELQITIWFKNKRFKIKKS	EKQIVKWFDNKRVKIKKS	EAQIGKWFNNKRQKIKKS	ERQIAKWFENKRMKIKKS	ESQIRRWFDNKRQKIKKS	EIQILKWFQNKRCKIKKS	ERQIQRWFSNKRAKIKKS	ESQISKWFENKRYKIKKS	EAQIMAWFRNKRYKIKKS	EVQIATWFANKRAKIKKS	EYQISRWFINKRAKIKKS
>161.241.AAA	>161.128.AAC	>161.257.AAG	>161.202.AAT	>161.248.ACA	>161.207.ACC	>161.126.ACG	>161.158.ACT	>161.235.AGA	>161.243.AGC	>161.241.AGG	>161.253.AGT	>161.257.ATA	>161.48.ATC	>161.226.ATG	>161.144.ATT	>161.100.CAA	>161.78.CAC	>161.427.CAG	>161.123.CAT	>161.177.CCA	>161.362.CCC	>161.243.CCG	>161.148.CCT	>161.319.CGA	>161.271.CGC	>161.72.CGG	>161.268.CGT	>161.276.CTA	>161.45.CTC		>161.144.CTT	>161.72.GAA	>161.23.GAC	>161.77.GAG	>161.30.GAT	>161.33.GCA		>161.35.GCG	>161.31.GCT	>161.88.GGA	>161.26.GGC	>161.131.GGG	>161.92.GGT	>161.59.GTA	>161.41.GTC	>161.51.GTG	>161.100.GTT	>161.83.TAA	>161.94.TAC
ENQIVYWFVNKRHKIKKS	EKQISGWFRNKRHKIKKS	EKQICQWFWNKRWKIKKS	ENQIMNWFSNKRFKIKKS	ERQISNWFHNKRTKIKKS	EGQILNWFANKRKKIKKS	EKQIMTWFQNKRTKIKKS	EEQILLWFGNKRAKIKKS	EKQILLWFFNKRSKIKKS	EEQILTWFRNKRMKIKKS	EKQIGKWFENKRRKIKKS	ERQIRKWFENKRWKIKKS	ERQIMSWFANKRVKIKKS	EQQIGPWFQNKRLKIKKS	EAQIITWFMNKRAKIKKS	EQQIKVWFQNKRRKIKKS	EVQIFMWFANKRRKIKKS	EMQILQWFSNKRRKIKKS	EDQIKHWFWNKRRKIKKS	EKQIQMWFSNKRRKIKKS	EKQIKMWFQNKRKKIKKS	EIQIHNWFSNKRKKIKKS	EGQIRDWFQNKRKKIKKS	EKQIMNWFGNKRKKIKKS	EAQIMYWFQNKRRKIKKS	EKQIMCWFSNKRRKIKKS	EAQITHWFENKRRKIKKS	ETQIMNWFSNKRRKIKKS	EKQITFWFSNKRAKIKKS	EIQIRYWFSNKRKKIKKS		EQQILNWFSNKRRKIKKS	EAQITHWFKNKRWKIKKS	EGQIQRWFRNKRFKIKKS	ETQIQRWFWNKRYKIKKS	ELQILVWFRNKRYKIKKS	EAQIYNWFRNKRAKIKKS		EAQIADWFRNKRFKIKKS	ELQIRDWFRNKRYKIKKS	ERQILKWFDNKRVKIKKS	ERQITKWFNNKRCKIKKS	EGQISKWFENKRAKIKKS	ERQISKWFDNKRWKIKKS	ERQIVKWFQNKRSKIKKS	EAQISRWFGNKRFKIKKS	ERQIQKWFENKRWKIKKS	ELQIRQWFANKRYKIKKS	EKQITIWFANKRSKIKKS	EEQIRVWFSNKRSKIKKS
>162.240.AAA	>162.126.AAC	>162.256.AAG	>162.201.AAT	>162.248.ACA	>162.204.ACC	>162.126.ACG	>162.154.ACT	>162.235.AGA	>162.242.AGC	>162.236.AGG	>162.253.AGT	>162.257.ATA	>162.45.ATC	>162.225.ATG	>162.143.ATT	>162.100.CAA	>162.77.CAC	>162.426.CAG	>162.123.CAT	>162.175.CCA	>162.360.CCC	>162.242.CCG	>162.146.CCT	>162.318.CGA	>162.261.CGC	>162.71.CGG	>162.268.CGT	>162.271.CTA	>162.44.CTC		>162.144.CTT	>162.72.GAA	>162.23.GAC	>162.76.GAG	>162.30.GAT	>162.33.GCA		>162.35.GCG	>162.31.GCT	>162.88.GGA	>162.26.GGC	>162.129.GGG	>162.90.GGT	>162.59.GTA	>162.40.GTC	>162.51.GTG	>162.99.GTT	>162.82.TAA	>162.94.TAC
ERQITYWFVNKRHKIKKS	EAQISSWFRNKRFKIKKS	ESQIKQWFWNKRHKIKKS	ERQIVSWFANKRHKIKKS	ESQIRNWFNNKRRKIKKS	EKQIATWFHNKRTKIKKS	EKQIAHWFENKRRKIKKS	ERQIRNWFQNKRKKIKKS	EKQISRWFENKRWKIKKS	ERQIARWFNNKRVKIKKS	EKQIMKWFENKRTKIKKS	EKQIRKWFENKRCKIKKS	EKQIVCWFANKRVKIKKS	EVQIPIWFWNKRQKIKKS	ESQITNWFQNKRHKIKKS	EYQINGWFGNKRLKIKKS	ESQIMMWFANKRRKIKKS	ESQIGMWFRNKRRKIKKS	ERQILSWFANKRVKIKKS	ESQINTWFSNKRRKIKKS	EPQISNWFANKRKKIKKS	EIQITNWFSNKRKKIKKS	ERQIQYWFENKRRKIKKS	ELQITNWFHNKRKKIKKS	ERQIFDWFANKRRKIKKS	EKQIAMWFNNKRRKIKKS	EVQIGRWFENKRRKIKKS	EVQISCWFSNKRRKIKKS	EQQIQYWFSNKRKKIKKS	ETQIRYWFSNKRKKIKKS		EKQIMNWFANKRKKIKKS	EDQILRWFQNKRWKIKKS	EGQIARWFRNKRWKIKKS	EIQIMTWFWNKRYKIKKS	ELQIAMWFRNKRYKIKKS	ECQIARWFQNKRAKIKKS		EVQILDWFRNKRYKIKKS	EAQIADWFRNKRYKIKKS	EMQISKWFDNKRQKIKKS	ERQISKWFNNKRLKIKKS	ENQISKWFENKRRKIKKS	ERQIMKWFANKRDKIKKS	EMQIGNWFRNKRLKIKKS	EKQISKWFRNKRTKIKKS	ESQIDRWFQNKRYKIKKS	ERQIMRWFGNKRWKIKKS	ERQIATWFVNKRAKIKKS	EEQIRVWFSNKRSKIKKS
>163.239.AAA	>163.126.AAC	>163.254.AAG	>163.201.AAT	>163.247.ACA	>163.195.ACC	>163.123.ACG	>163.154.ACT	>163.234.AGA	>163.239.AGC	>163.233.AGG	>163.251.AGT	>163.255.ATA	>163.45.ATC	>163.224.ATG	>163.141.ATT	>163.100.CAA	>163.77.CAC	>163.424.CAG	>163.123.CAT	>163.174.CCA	>163.352.CCC	>163.240.CCG	>163.146.CCT	>163.315.CGA	>163.261.CGC	>163.71.CGG	>163.267.CGT	>163.270.CTA	>163.44.CTC		>163.143.CTT	>163.72.GAA	>163.22.GAC	>163.76.GAG	>163.29.GAT	>163.33.GCA		>163.35.GCG	>163.31.GCT	>163.88.GGA	>163.25.GGC	>163.128.GGG	>163.90.GGT	>163.59.GTA	>163.39.GTC	>163.51.GTG	>163.97.GTT	>163.82.TAA	>163.94.TAC
EMQISCWFANKRHKIKKS	EGQISSWFRNKRFKIKKS	ERQIAQWFWNKRSKIKKS	EKQIAAWFSNKRFKIKKS	ELQIVNWFNNKRRKIKKS	EKQITTWFSNKRKKIKKS	ESQIRNWFDNKRRKIKKS	EKQITSWFHNKRMKIKKS	EHQIRAWFKNKRYKIKKS	ERQISRWFNNKRVKIKKS	ELQIGKWFENKRYKIKKS	ERQIVKWFENKRAKIKKS	EKQIVQWFANKRAKIKKS	EGQIPLWFANKRSKIKKS	ELQITYWFQNKRTKIKKS	EKQIRLWFQNKRAKIKKS	EVQIFYWFSNKRRKIKKS	EAQISYWFSNKRRKIKKS	ERQIMYWFWNKRRKIKKS	ETQIAYWFSNKRRKIKKS	ERQITLWFQNKRKKIKKS	EKQIVYWFENKRRKIKKS	EKQINNWFENKRKKIKKS	EQQILQWFANKRKKIKKS	ESQIFNWFANKRKKIKKS	ETQIRHWFSNKRRKIKKS	EQQIRWWFENKRRKIKKS	ERQISYWFGNKRTKIKKS	ELQIRFWFSNKRKKIKKS	EMQIYWWFSNKRKKIKKS		ESQIGYWFGNKRRKIKKS	ESQIIRWFQNKRWKIKKS	EAQIIRWFRNKRWKIKKS	ELQISRWFWNKRWKIKKS	ERQIMHWFRNKRWKIKKS	ESQIQKWFQNKRRKIKKS		ERQITDWFRNKRWKIKKS	ENQIYAWFKNKRYKIKKS	EKQIRKWFQNKREKIKKS	ELQILKWFNNKRHKIKKS	EKQILKWFENKRLKIKKS	ESQISKWFNNKRLKIKKS	EIQIFHWFKNKRRKIKKS	ERQIRRWFGNKRAKIKKS	EFQIGKWFENKRFKIKKS	ERQICKWFANKRFKIKKS	ERQITIWFSNKRAKIKKS	ESQIRVWFSNKRAKIKKS
>164.233.AAA	>164.125.AAC	>164.254.AAG	>164.198.AAT	>164.245.ACA	>164.191.ACC	>164.122.ACG	>164.153.ACT	>164.231.AGA	>164.239.AGC	>164.232.AGG	>164.250.AGT	>164.254.ATA	>164.45.ATC	>164.223.ATG	>164.140.ATT	>164.100.CAA	>164.77.CAC	>164.422.CAG	>164.122.CAT	>164.170.CCA	>164.351.CCC	>164.240.CCG	>164.146.CCT	>164.310.CGA	>164.258.CGC	>164.67.CGG	>164.259.CGT	>164.268.CTA	>164.44.CTC		>164.142.CTT	>164.71.GAA	>164.22.GAC	>164.75.GAG	>164.29.GAT	>164.32.GCA		>164.35.GCG	>164.31.GCT	>164.87.GGA	>164.25.GGC	>164.128.GGG	>164.90.GGT	>164.59.GTA	>164.39.GTC	>164.50.GTG	>164.97.GTT	>164.81.TAA	>164.94.TAC
EKQILNWFANKRFKIKKS	ENQISSWFRNKRFKIKKS	EKQIMVWFWNKRHKIKKS	EWQIYMWFKNKRYKIKKS	EVQISNWFWNKRRKIKKS	EHQIRAWFLNKRSKIKKS	ECQIFEWFRNKRRKIKKS	EWQIDIWFCNKREKIKKS	ERQIRRWFENKRWKIKKS	ETQIYRWFNNKRVKIKKS	ERQIMKWFENKRVKIKKS	EKQIHKWFQNKRYKIKKS	ESQIRWWFQNKRVKIKKS	EYQIAVWFNNKRSKIKKS	ELQIHYWFQNKRHKIKKS	EVQIKIWFQNKRMKIKKS	EMQIYWWFANKRRKIKKS	ETQIRMWFSNKRRKIKKS	EDQIMLWFGNKRVKIKKS	EVQITTWFSNKRRKIKKS	ESQIMNWFQNKRKKIKKS	ERQIMTWFNNKRKKIKKS	EKQISNWFENKRKKIKKS	ERQIMDWFHNKRRKIKKS	ESQIFNWFANKRKKIKKS	ERQIADWFSNKRRKIKKS	ESQIDRWFANKRNKIKKS	EVQIGYWFNNKRRKIKKS	ERQIRFWFANKRKKIKKS	EKQIMFWFSNKRKKIKKS		EVQISNWFGNKRKKIKKS	ELQIKRWFQNKRWKIKKS	EGQIRRWFRNKRWKIKKS	EVQISRWFWNKRWKIKKS	EMQIRVWFSNKRYKIKKS	ENQILVWFSNKRVKIKKS		ELQIADWFRNKRFKIKKS	EWQIVNWFRNKRWKIKKS	ERQIAKWFDNKRWKIKKS	ERQIMKWFSNKRQKIKKS	EYQITKWFENKRAKIKKS	EHQITKWFDNKRWKIKKS	EMQIARWFQNKRLKIKKS	ERQILGWFWNKRLKIKKS	EEQIIKWFENKRYKIKKS	EGQILAWFRNKRYKIKKS	EKQILVWFRNKRAKIKKS	EEQIRVWFSNKRQKIKKS
>165.233.AAA	>165.125.AAC	>165.251.AAG	>165.194.AAT	>165.244.ACA	>165.191.ACC	>165.122.ACG	>165.144.ACT	>165.230.AGA	>165.237.AGC	>165.231.AGG	>165.243.AGT	>165.254.ATA	>165.44.ATC	>165.221.ATG	>165.140.ATT	>165.100.CAA	>165.77.CAC	>165.422.CAG	>165.122.CAT	>165.168.CCA	>165.347.CCC	>165.237.CCG	>165.145.CCT	>165.306.CGA	>165.257.CGC	>165.67.CGG	>165.258.CGT	>165.265.CTA	>165.43.CTC		>165.141.CTT	>165.71.GAA	>165.22.GAC	>165.75.GAG	>165.29.GAT	>165.32.GCA		>165.34.GCG	>165.31.GCT	>165.85.GGA	>165.25.GGC	>165.128.GGG	>165.89.GGT	>165.59.GTA	>165.39.GTC	>165.50.GTG	>165.97.GTT	>165.81.TAA	>165.92.TAC
ERQIHFWFVNKRSKIKKS	EVQISDWFRNKRFKIKKS	EKQIAQWFWNKRWKIKKS	ERQIVSWFSNKRFKIKKS	ERQILYWFQNKRRKIKKS	EQQIATWFSNKRKKIKKS	EKQIITWFQNKRNKIKKS	EVQIMMWFINKRQKIKKS	EKQISQWFWNKRWKIKKS	ECQIARWFNNKRVKIKKS	ETQIRWWFGNKRSKIKKS	EAQIRSWFSNKRVKIKKS	EVQIVRWFANKRVKIKKS	EIQIRMWFANKRWKIKKS	ERQITYWFQNKRSKIKKS	ESQIRYWFHNKRVKIKKS	ERQIFNWFANKRRKIKKS	EQQIRCWFSNKRRKIKKS	ETQISNWFWNKRRKIKKS	ERQIMTWFGNKRRKIKKS	ERQITTWFQNKRKKIKKS	EVQISNWFGNKRKKIKKS	ELQICNWFHNKRRKIKKS	EQQIGNWFSNKRKKIKKS	EQQISRWFENKRRKIKKS	EGQIHNWFSNKRRKIKKS	EVQISHWFENKRRKIKKS	ERQIYNWFSNKRRKIKKS	ERQIAYWFANKRRKIKKS	ECQITNWFQNKRKKIKKS		ELQIGYWFSNKRKKIKKS	EWQIARWFQNKRWKIKKS	EFQIMRWFRNKRWKIKKS	EHQIKQWFWNKRYKIKKS	ERQIMVWFRNKRWKIKKS	EFQILRWFQNKRHKIKKS		EKQILDWFRNKRYKIKKS	EMQIMDWFRNKRFKIKKS	ESQIRKWFDNKRAKIKKS	EGQIGKWFNNKRMKIKKS	EGQIGKWFENKRRKIKKS	EYQIRRWFDNKRMKIKKS	ESQIYNWFRNKRLKIKKS	ESQIERWFRNKRYKIKKS	ELQISKWFENKRWKIKKS	ETQIARWFGNKRMKIKKS	ERQITLWFRNKRSKIKKS	EYQISRWFINKRAKIKKS
>166.233.AAA	>166.124.AAC	>166.251.AAG	>166.194.AAT	>166.243.ACA	>166.190.ACC	>166.121.ACG	>166.143.ACT	>166.229.AGA	>166.235.AGC	>166.230.AGG	>166.242.AGT	>166.253.ATA	>166.43.ATC	>166.220.ATG	>166.140.ATT	>166.99.CAA	>166.76.CAC	>166.421.CAG	>166.122.CAT	>166.167.CCA	>166.344.CCC	>166.237.CCG	>166.145.CCT	>166.304.CGA	>166.257.CGC	>166.67.CGG	>166.258.CGT	>166.264.CTA	>166.42.CTC		>166.141.CTT	>166.70.GAA	>166.22.GAC	>166.75.GAG	>166.29.GAT	>166.32.GCA		>166.34.GCG	>166.31.GCT	>166.85.GGA	>166.25.GGC	>166.127.GGG	>166.89.GGT	>166.59.GTA	>166.39.GTC	>166.50.GTG	>166.96.GTT	>166.79.TAA	>166.92.TAC
EAQISTWFANKRFKIKKS	EKQIESWFRNKRFKIKKS	ELQISQWFWNKRFKIKKS	ETQICTWFANKRFKIKKS	ETQIKNWFNNKRRKIKKS	EKQITDWFSNKRKKIKKS	EQQIKYWFENKRRKIKKS	ELQIKWWFENKRKKIKKS	ELQIKKWFTNKRWKIKKS	ERQISTWFSNKRVKIKKS	ERQISKWFENKRRKIKKS	EKQINYWFSNKRTKIKKS	ERQILSWFANKRTKIKKS	ERQINSWFANKRAKIKKS	ERQIICWFQNKRAKIKKS	EKQIRHWFQNKRAKIKKS	ESQILHWFQNKRRKIKKS	EAQIMMWFRNKRRKIKKS	EMQISHWFWNKRRKIKKS	EQQIRMWFSNKRRKIKKS	EKQITHWFQNKRKKIKKS	ERQIRDWFLNKRKKIKKS	EIQITNWFHNKRKKIKKS	EQQIMDWFGNKRKKIKKS	ETQIFHWFANKRKKIKKS	ETQIRDWFSNKRRKIKKS	ESQIGHWFENKRRKIKKS	ERQIMNWFSNKRRKIKKS	EIQIKWWFSNKRKKIKKS	ELQIRYWFSNKRKKIKKS		ESQIGNWFGNKRRKIKKS	EKQIRRWFQNKRWKIKKS	EVQINRWFRNKRWKIKKS	ESQIGRWFWNKRYKIKKS	ELQIVMWFRNKRYKIKKS	EGQIARWFQNKRAKIKKS		EKQILDWFRNKRAKIKKS	EQQINVWFKNKRFKIKKS	EKQIGKWFDNKRHKIKKS	EEQILKWFSNKRQKIKKS	ERQIMKWFENKRTKIKKS	EKQIRKWFDNKRVKIKKS	EVQILRWFSNKRAKIKKS	ERQIGKWFRNKRCKIKKS	ERQIAKWFENKRWKIKKS	ESQILRWFGNKRYKIKKS	EGQIATWFCNKRAKIKKS	EKQIRIWFSNKRVKIKKS
>167.233.AAA	>167.124.AAC	>167.251.AAG	>167.191.AAT	>167.241.ACA	>167.190.ACC	>167.121.ACG	>167.141.ACT	>167.228.AGA	>167.235.AGC	>167.229.AGG	>167.240.AGT	>167.252.ATA	>167.43.ATC	>167.219.ATG	>167.140.ATT	>167.99.CAA	>167.76.CAC	>167.418.CAG	>167.122.CAT	>167.165.CCA	>167.342.CCC	>167.237.CCG	>167.145.CCT	>167.303.CGA	>167.255.CGC	>167.66.CGG	>167.256.CGT	>167.263.CTA	>167.41.CTC		>167.139.CTT	>167.70.GAA	>167.22.GAC	>167.74.GAG	>167.29.GAT	>167.32.GCA		>167.34.GCG	>167.31.GCT	>167.84.GGA	>167.25.GGC	>167.126.GGG	>167.89.GGT	>167.59.GTA	>167.39.GTC	>167.49.GTG	>167.96.GTT	>167.79.TAA	>167.91.TAC
ESQISSWFANKRFKIKKS	EVQISVWFRNKRFKIKKS	ERQIMQWFWNKRWKIKKS	EGQIMTWFTNKRHKIKKS	ENQIKMWFWNKRRKIKKS	ERQIMTWFHNKRSKIKKS	EKQIMAWFQNKRNKIKKS	ETQIRYWFENKRRKIKKS	ERQIFRWFANKRWKIKKS	ERQIMRWFNNKRVKIKKS	ERQIAKWFDNKRQKIKKS	EIQIRKWFENKRHKIKKS	EAQIHSWFANKRAKIKKS	ECQIFDWFSNKRFKIKKS	ESQITYWFQNKRWKIKKS	EYQIKVWFMNKRAKIKKS	ESQIMYWFQNKRRKIKKS	EKQIYYWFSNKRRKIKKS	EVQIVWWFVNKRRKIKKS	EFQIGNWFSNKRRKIKKS	EEQIMYWFQNKRKKIKKS	ETQIGNWFSNKRKKIKKS	ERQIINWFQNKRKKIKKS	ELQINNWFSNKRKKIKKS	ECQISYWFGNKRRKIKKS	ESQIVCWFSNKRRKIKKS	ERQICHWFENKRRKIKKS	ESQISNWFSNKRRKIKKS	EVQIYNWFCNKRKKIKKS	ERQILMWFSNKRRKIKKS		EAQIVYWFGNKRAKIKKS	EVQIARWFQNKRHKIKKS	EQQIERWFRNKRWKIKKS	EKQISVWFWNKRYKIKKS	EAQIMDWFRNKRWKIKKS	ERQIVKWFQNKRNKIKKS		ENQITDWFRNKRYKIKKS	ERQIVDWFRNKRWKIKKS	ELQISKWFDNKRQKIKKS	ESQIRKWFSNKRMKIKKS	EAQILKWFENKRRKIKKS	ERQITKWFDNKRTKIKKS	EFQILRWFQNKRSKIKKS	EVQIQKWFRNKRFKIKKS	EKQIGKWFENKRCKIKKS	ELQITVWFRNKRYKIKKS	ERQIASWFANKRAKIKKS	EAQIRVWFSNKRAKIKKS
>168.232.AAA	>168.123.AAC	>168.247.AAG	>168.189.AAT	>168.241.ACA	>168.189.ACC	>168.118.ACG	>168.140.ACT	>168.226.AGA	>168.234.AGC	>168.227.AGG	>168.240.AGT	>168.251.ATA	>168.42.ATC	>168.217.ATG	>168.139.ATT	>168.98.CAA	>168.76.CAC	>168.416.CAG	>168.121.CAT	>168.165.CCA	>168.342.CCC	>168.228.CCG	>168.145.CCT	>168.302.CGA	>168.253.CGC	>168.65.CGG	>168.256.CGT	>168.262.CTA	>168.41.CTC		>168.139.CTT	>168.69.GAA	>168.22.GAC	>168.74.GAG	>168.29.GAT	>168.31.GCA		>168.34.GCG	>168.30.GCT	>168.83.GGA	>168.25.GGC	>168.126.GGG	>168.88.GGT	>168.58.GTA	>168.39.GTC	>168.49.GTG	>168.96.GTT	>168.78.TAA	>168.91.TAC
ESQIRCWFANKRHKIKKS	ELQISSWFRNKRFKIKKS	ERQIAQWFWNKRWKIKKS	ERQIAAWFSNKRHKIKKS	EMQIRNWFDNKRRKIKKS	ERQISNWFHNKRTKIKKS	ERQIPSWFMNKRDKIKKS	ERQIKWWFENKRKKIKKS	EVQIRYWFNNKRAKIKKS	ERQIQYWFSNKRTKIKKS	ETQIRGWFSNKRSKIKKS	ERQIRKWFENKRWKIKKS	ERQISAWFANKRTKIKKS	EVQIRMWFANKRFKIKKS	ERQIVYWFQNKRTKIKKS	EKQIKLWFQNKRSKIKKS	EAQILNWFANKRRKIKKS	ELQIAMWFRNKRRKIKKS	EVQINTWFHNKRRKIKKS	ERQIAQWFSNKRRKIKKS	EVQIMQWFQNKRKKIKKS	ERQILDWFHNKRRKIKKS	ERQIMYWFENKRRKIKKS	ETQIGDWFSNKRKKIKKS	EKQICYWFANKRAKIKKS	EIQIRHWFSNKRRKIKKS	EGQIVRWFENKRRKIKKS	ESQIANWFSNKRRKIKKS	EKQIAYWFANKRKKIKKS	EKQIGNWFRNKRKKIKKS		EQQIMYWFSNKRKKIKKS	EWQIQRWFQNKRWKIKKS	EGQIDRWFRNKRWKIKKS	ESQICRWFMNKRYKIKKS	ETQIMHWFRNKRFKIKKS	ERQINKWFSNKRAKIKKS		ERQIEDWFRNKRYKIKKS	EMQIYAWFKNKRYKIKKS	EGQIMKWFDNKRFKIKKS	EKQIGKWFNNKRAKIKKS	ERQIMRWFDNKRQKIKKS	EMQIGKWFNNKRRKIKKS	ESQIRRWFQNKRWKIKKS	EKQIAKWFLNKRFKIKKS	ETQITKWFENKRFKIKKS	EGQIRAWFANKRYKIKKS	EKQIQTWFVNKRVKIKKS	EEQIRVWFSNKRSKIKKS
>169.231.AAA	>169.123.AAC	>169.245.AAG	>169.188.AAT	>169.241.ACA	>169.186.ACC	>169.117.ACG	>169.137.ACT	>169.226.AGA	>169.230.AGC	>169.226.AGG	>169.238.AGT	>169.251.ATA	>169.42.ATC	>169.216.ATG	>169.139.ATT	>169.98.CAA	>169.76.CAC	>169.413.CAG	>169.121.CAT	>169.164.CCA	>169.340.CCC	>169.228.CCG	>169.145.CCT	>169.301.CGA	>169.252.CGC	>169.65.CGG	>169.255.CGT	>169.261.CTA	>169.41.CTC		>169.138.CTT	>169.69.GAA	>169.22.GAC	>169.74.GAG	>169.29.GAT	>169.31.GCA		>169.34.GCG	>169.30.GCT	>169.82.GGA	>169.24.GGC	>169.126.GGG	>169.87.GGT	>169.58.GTA	>169.38.GTC	>169.48.GTG	>169.95.GTT	>169.78.TAA	>169.91.TAC
EVQIKYWFVNKRHKIKKS	EGQICSWFRNKRHKIKKS	EMQITQWFWNKRHKIKKS	EQQIRYWFANKRFKIKKS	ESQIRDWFNNKRRKIKKS	ERQIITWFHNKRVKIKKS	ERQIWMWFDNKRLKIKKS	ESQIKYWFQNKRNKIKKS	EAQIFRWFANKRAKIKKS	ESQISRWFNNKRVKIKKS	EKQISKWFENKRAKIKKS	ELQIKKWFENKRYKIKKS	EKQIMQWFANKRVKIKKS	EVQIKVWFQNKRNKIKKS	EKQITYWFQNKRCKIKKS	ERQITLWFQNKRQKIKKS	ELQICYWFQNKRRKIKKS	EAQIMMWFRNKRRKIKKS	ELQISHWFWNKRRKIKKS	ELQIANWFSNKRRKIKKS	EKQILQWFANKRRKIKKS	EMQIACWFSNKRKKIKKS	ESQIQNWFENKRRKIKKS	ERQITDWFSNKRKKIKKS	ESQIHNWFSNKRRKIKKS	ERQIAMWFSNKRRKIKKS	EKQITNWFENKRRKIKKS	EKQIVYWFSNKRRKIKKS	EAQIAHWFSNKRKKIKKS	ELQIRYWFSNKRRKIKKS		EQQITNWFGNKRKKIKKS	ENQIRHWFKNKRWKIKKS	ELQIVRWFRNKRFKIKKS	EIQIMTWFWNKRYKIKKS	EVQIMRWFLNKRYKIKKS	EEQIYNWFRNKRWKIKKS		ELQILDWFRNKRYKIKKS	ELQISDWFRNKRYKIKKS	EQQIMRWFDNKRQKIKKS	EGQITKWFNNKRFKIKKS	EEQILRWFENKRYKIKKS	EAQIAKWFDNKRQKIKKS	EVQIFNWFRNKRQKIKKS	EAQIGKWFRNKRLKIKKS	EHQILIWFQNKRYKIKKS	EGQIRRWFSNKRFKIKKS	ERQIQLWFRNKRFKIKKS	EAQIRIWFSNKRAKIKKS
>170.230.AAA	>170.122.AAC	>170.244.AAG	>170.186.AAT	>170.237.ACA	>170.182.ACC	>170.116.ACG	>170.137.ACT	>170.225.AGA	>170.230.AGC	>170.224.AGG	>170.237.AGT	>170.250.ATA	>170.41.ATC	>170.215.ATG	>170.138.ATT	>170.98.CAA	>170.76.CAC	>170.412.CAG	>170.121.CAT	>170.164.CCA	>170.340.CCC	>170.228.CCG	>170.140.CCT	>170.300.CGA	>170.252.CGC	>170.64.CGG	>170.255.CGT	>170.259.CTA	>170.40.CTC		>170.138.CTT	>170.69.GAA	>170.22.GAC	>170.73.GAG	>170.29.GAT	>170.31.GCA		>170.33.GCG	>170.30.GCT	>170.81.GGA	>170.24.GGC	>170.124.GGG	>170.87.GGT	>170.58.GTA	>170.38.GTC	>170.48.GTG	>170.95.GTT	>170.77.TAA	>170.91.TAC
ETQILQWFANKRFKIKKS	ERQIVSWFRNKRFKIKKS	ERQIQQWFWNKRFKIKKS	EVQIRRWFSNKRVKIKKS	EMQISNWFCNKRRKIKKS	ETQITAWFHNKRMKIKKS	EKQIRTWFENKRRKIKKS	ERQISMWFHNKRSKIKKS	ETQIFRWFANKRWKIKKS	ENQILSWFANKRDKIKKS	EKQIVTWFENKRYKIKKS	EKQIRGWFMNKRSKIKKS	EKQIMVWFNNKRSKIKKS	ERQIRMWFANKRHKIKKS	ETQITYWFQNKRWKIKKS	ELQISSWFFNKRMKIKKS	ELQILHWFQNKRRKIKKS	EKQITCWFSNKRRKIKKS	ETQITTWFINKRRKIKKS	EKQIQDWFSNKRRKIKKS	EAQIFNWFANKRKKIKKS	ETQIKDWFSNKRKKIKKS	ESQISNWFWNKRKKIKKS	ESQIVNWFGNKRKKIKKS	ETQIHHWFANKRRKIKKS	ELQITNWFSNKRRKIKKS	EKQIIYWFENKRRKIKKS	ECQIGNWFSNKRRKIKKS	ELQIRYWFSNKRKKIKKS	ERQIAFWFGNKRKKIKKS		ERQILYWFGNKRKKIKKS	ETQIYNWFKNKRFKIKKS	EPQIVRWFRNKRWKIKKS	ELQISRWFWNKRYKIKKS	EKQISMWFRNKRWKIKKS	EKQITDWFRNKRMKIKKS		EFQINDWFRNKRYKIKKS	EQQIADWFRNKRYKIKKS	ESQIFRWFANKRYKIKKS	ERQITKWFNNKRLKIKKS	EGQILKWFENKRGKIKKS	EGQIRKWFDNKRQKIKKS	EKQINRWFQNKRSKIKKS	ERQIGKWFRNKRAKIKKS	ELQIRGWFFNKRGKIKKS	ELQIMKWFSNKRSKIKKS	ERQITTWFSNKRSKIKKS	EYQIRIWFSNKRVKIKKS
>171.229.AAA	>171.122.AAC	>171.242.AAG	>171.186.AAT	>171.236.ACA	>171.182.ACC	>171.116.ACG	>171.134.ACT	>171.224.AGA	>171.224.AGC	>171.224.AGG	>171.236.AGT	>171.247.ATA	>171.41.ATC	>171.215.ATG	>171.138.ATT	>171.97.CAA	>171.76.CAC	>171.411.CAG	>171.121.CAT	>171.164.CCA	>171.339.CCC	>171.224.CCG	>171.139.CCT	>171.299.CGA	>171.250.CGC	>171.64.CGG	>171.254.CGT	>171.256.CTA	>171.40.CTC		>171.137.CTT	>171.69.GAA	>171.22.GAC	>171.73.GAG	>171.29.GAT	>171.31.GCA		>171.33.GCG	>171.30.GCT	>171.81.GGA	>171.24.GGC	>171.124.GGG	>171.85.GGT	>171.57.GTA	>171.37.GTC	>171.48.GTG	>171.95.GTT	>171.76.TAA	>171.90.TAC
ECQINYWFVNKRAKIKKS	ESQIVDWFRNKRFKIKKS	ERQIVQWFWNKRYKIKKS	ERQILSWFSNKRFKIKKS	EKQISNWFHNKRTKIKKS	ERQITNWFHNKRQKIKKS	EKQIMTWFQNKRTKIKKS	ERQIASWFHNKRQKIKKS	EVQIFRWFANKRFKIKKS	ERQIIRWFNNKRVKIKKS	EKQILKWFENKRRKIKKS	EKQIGRWFENKRYKIKKS	EMQIRWWFNNKRWKIKKS	EWQIRAWFKNKRYKIKKS	RAAVRFWFMNKRGKIKKS	EVQIKTWFQNKRAKIKKS	ERQIMDWFVNKRRKIKKS	ENQIGMWFRNKRRKIKKS	EKQIQWWFWNKRRKIKKS	EEQISMWFSNKRRKIKKS	EVQIGNWFANKRKKIKKS	ELQISYWFSNKRKKIKKS	EMQIQNWFANKRKKIKKS	ERQILDWFHNKRRKIKKS	ENQIFNWFANKRSKIKKS	ESQISMWFSNKRRKIKKS	EKQISYWFENKRRKIKKS	ETQISAWFSNKRWKIKKS	ETQISWWFSNKRKKIKKS	ECQIAYWFGNKRKKIKKS		ERQIMYWFNNKRRKIKKS	ESQIQRWFQNKRWKIKKS	EEQIRRWFRNKRWKIKKS	EGQISRWFWNKRYKIKKS	ECQISMWFRNKRYKIKKS	EPQIERWFQNKRYKIKKS		EGQISDWFRNKRYKIKKS	ERQISIWFKNKRWKIKKS	EHQIFRWFANKRFKIKKS	EKQITKWFNNKRSKIKKS	EKQITKWFENKRRKIKKS	EAQIGKWFNNKRLKIKKS	EWQINRWFQNKRSKIKKS	EQQIMKWFRNKRFKIKKS	EQQIAKWFMNKRAKIKKS	ESQITRWFANKRFKIKKS	ERQIGVWFVNKRAKIKKS	EEQIRVWFSNKRAKIKKS
>172.227.AAA	>172.122.AAC	>172.238.AAG	>172.185.AAT	>172.236.ACA	>172.181.ACC	>172.115.ACG	>172.134.ACT	>172.224.AGA	>172.223.AGC	>172.223.AGG	>172.235.AGT	>172.245.ATA	>172.41.ATC	>172.215.ATG	>172.137.ATT	>172.97.CAA	>172.76.CAC	>172.410.CAG	>172.121.CAT	>172.163.CCA	>172.338.CCC	>172.222.CCG	>172.139.CCT	>172.298.CGA	>172.249.CGC	>172.64.CGG	>172.252.CGT	>172.255.CTA	>172.40.CTC		>172.136.CTT	>172.68.GAA	>172.22.GAC	>172.72.GAG	>172.29.GAT	>172.31.GCA		>172.33.GCG	>172.30.GCT	>172.80.GGA	>172.24.GGC	>172.123.GGG	>172.85.GGT	>172.57.GTA	>172.37.GTC	>172.48.GTG	>172.95.GTT	>172.76.TAA	>172.90.TAC
ERQIYYWFVNKRVKIKKS	ESQIGQWFRNKRFKIKKS	ERQIVQWFWNKRFKIKKS	ERQISSWFSNKRFKIKKS	ESQINSWFHNKRTKIKKS	EAQIATWFANKRKKIKKS	EKQIMYWFENKRRKIKKS	ETQITNWFHNKREKIKKS	EWQIKYWFNNKRWKIKKS	EVQISRWFSNKRVKIKKS	EGQITLWFENKRGKIKKS	EKQIKVWFQNKRFKIKKS	EKQILYWFNNKRAKIKKS	EKQILTWFHNKRKKIKKS	ESQITYWFQNKRWKIKKS	ERQIMVWFQNKRSKIKKS	EKQIMYWFANKRAKIKKS	ERQIQDWFRNKRRKIKKS	ERQISNWFWNKRRKIKKS	ERQIQDWFGNKRRKIKKS	ERQIQTWFANKRKKIKKS	EVQIGNWFSNKRKKIKKS	EVQITYWFHNKRKKIKKS	ERQIANWFSNKRKKIKKS	EKQIADWFGNKRRKIKKS	EVQIMYWFSNKRRKIKKS	EVQINRWFENKRRKIKKS	ERQIVTWFNNKRKKIKKS	ERQIMFWFANKRSKIKKS	ELQIRYWFGNKRKKIKKS		ESQITNWFGNKRKKIKKS	EVQIKRWFQNKRWKIKKS	EFQITRWFRNKRWKIKKS	ELQIQRWFWNKRWKIKKS	EHQIGRWFLNKRYKIKKS	EKQITKWFQNKRRKIKKS		ELQIADWFRNKRYKIKKS	EFQIQNWFRNKRFKIKKS	EVQISKWFDNKRFKIKKS	ESQIMKWFSNKREKIKKS	ERQICKWFENKRRKIKKS	ELQIVKWFSNKRWKIKKS	ELQILRWFQNKRTKIKKS	EYQIRRWFANKRQKIKKS	EVQITRWFENKRYKIKKS	EMQIYKWFANKRFKIKKS	ERQIVIWFRNKRAKIKKS	ENQIRVWFSNKRVKIKKS
>173.226.AAA	>173.122.AAC	>173.237.AAG	>173.183.AAT	>173.235.ACA	>173.181.ACC	>173.115.ACG	>173.132.ACT	>173.223.AGA	>173.222.AGC	>173.222.AGG	>173.234.AGT	>173.243.ATA	>173.40.ATC	>173.214.ATG	>173.135.ATT	>173.97.CAA	>173.75.CAC	>173.409.CAG	>173.121.CAT	>173.162.CCA	>173.336.CCC	>173.220.CCG	>173.137.CCT	>173.296.CGA	>173.247.CGC	>173.64.CGG	>173.251.CGT	>173.255.CTA	>173.40.CTC		>173.136.CTT	>173.68.GAA	>173.22.GAC	>173.70.GAG	>173.29.GAT	>173.31.GCA		>173.33.GCG	>173.30.GCT	>173.79.GGA	>173.24.GGC	>173.122.GGG	>173.84.GGT	>173.57.GTA	>173.37.GTC	>173.47.GTG	>173.95.GTT	>173.76.TAA	>173.88.TAC
EVQISSWFANKRFKIKKS	EKQINSWFRNKRFKIKKS	EKQIKQWFWNKRAKIKKS	EKQIGAWFSNKRFKIKKS	EKQIVAWFHNKRMKIKKS	ERQISTWFANKRKKIKKS	EDQINRWFLNKRRKIKKS	ERQIKFWFENKRKKIKKS	ECQIGWWFENKRSKIKKS	EKQIARWFNNKRVKIKKS	EKQIRKWFENKRRKIKKS	ESQIIKWFENKRYKIKKS	ERQIVGWFQNKRTKIKKS	EVQIRMWFANKRWKIKKS	EQQITWWFLNKRPKIKKS	ERQIKLWFQNKRAKIKKS	ERQIGDWFANKRRKIKKS	EKQISMWFSNKRRKIKKS	EHQIVRWFHNKRMKIKKS	ERQILSWFSNKRRKIKKS	ETQINNWFANKRKKIKKS	EKQISTWFSNKRKKIKKS	EKQISMWFENKRKKIKKS	EGQIANWFSNKRKKIKKS	ESQIFNWFSNKRRKIKKS	EGQIRDWFSNKRRKIKKS	EKQIARWFENKRRKIKKS	EVQILNWFSNKRRKIKKS	EKQIHNWFANKRKKIKKS	ENQIFNWFRNKRKKIKKS		EDQIVYWFSNKRKKIKKS	EVQIGRWFQNKRWKIKKS	EAQIKRWFRNKRWKIKKS	EKQIKVWFWNKRYKIKKS	EYQILSWFRNKRYKIKKS	AETPAAEQRARPEKIKKS		EGQIKVWFKNKRYKIKKS	ERQILDWFRNKRYKIKKS	EMQIAKWFDNKRQKIKKS	EHQIMKWFNNKRTKIKKS	EEQICKWFENKRWKIKKS	EVQISKWFNNKRMKIKKS	ERQIVRWFQNKRVKIKKS	ERQIGKWFCNKRAKIKKS	ELQILRWFENKRYKIKKS	EKQITIWFRNKRYKIKKS	EMQITTWFQNKRAKIKKS	EMQIRIWFSNKRAKIKKS
>174.226.AAA	>174.121.AAC	>174.236.AAG	>174.179.AAT	>174.235.ACA	>174.179.ACC	>174.115.ACG	>174.131.ACT	>174.222.AGA	>174.216.AGC	>174.222.AGG	>174.234.AGT	>174.243.ATA	>174.39.ATC	>174.214.ATG	>174.135.ATT	>174.96.CAA	>174.75.CAC	>174.405.CAG	>174.121.CAT	>174.160.CCA	>174.335.CCC	>174.220.CCG	>174.134.CCT	>174.293.CGA	>174.246.CGC	>174.64.CGG	>174.250.CGT	>174.255.CTA	>174.39.CTC		>174.134.CTT	>174.68.GAA	>174.22.GAC	>174.70.GAG	>174.29.GAT	>174.30.GCA		>174.33.GCG	>174.30.GCT	>174.78.GGA	>174.24.GGC	>174.121.GGG	>174.84.GGT	>174.57.GTA	>174.36.GTC	>174.47.GTG	>174.95.GTT	>174.75.TAA	>174.87.TAC
EKQIKSWFQNKRHKIKKS	EMQISAWFRNKRFKIKKS	ERQIGQWFWNKRHKIKKS	ERQILAWFSNKRFKIKKS	EKQIKTWFENKRRKIKKS	ERQIEFWFFNKRAKIKKS	ERQIRYWFDNKRRKIKKS	ERQISNWFHNKRTKIKKS	ELQIARWFWNKRFKIKKS	EKQIHYWFRNKRVKIKKS	ERQIRKWFENKRRKIKKS	EWQIELWFRNKRVKIKKS	EKQITSWFANKRSKIKKS	EPQISLWFPNKRFKIKKS	EVQILEWFLNKRLKIKKS	ELQIQAWFTNKRGKIKKS	ERQIHDWFANKRRKIKKS	EVQIAYWFSNKRRKIKKS	NECQILTWFANHPKIKKS	EEQITNWFSNKRRKIKKS	EVQIATWFANKRKKIKKS	EVQISYWFSNNRKKIKKS	ENQISMWFANKRKKIKKS	EGQITNWFSNKRKKIKKS	EKQILYWFANKRVKIKKS	ELQISYWFSNKRAKIKKS	EPQIGYWFRNKRSKIKKS	EQQIMTWFNNKRRKIKKS	EMQIHFWFSNKRKKIKKS	ERQITMWFSNKRKKIKKS		EKQIYYWFANKRKKIKKS	EMQIQKWFQNKRWKIKKS	ESQISRWFRNKRWKIKKS	EKQIAHWFWNKRYKIKKS	EAQILVWFRNKRWKIKKS	EPQIMKWFQNKRVKIKKS		EKQINDWFRNKRYKIKKS	ERQISTWFKNKRWKIKKS	ERQIRKWFDNKRAKIKKS	ESQIMKWFNNKRFKIKKS	ERQILKWFENKRGKIKKS	EKQISKWFDNKRSKIKKS	ESQICRWFQNKRRKIKKS	EMQITRWFGNKRFKIKKS	EKQIVKWFENKRRKIKKS	EKQIQKWFANKRVKIKKS	EPQIGIWFHNKRAKIKKS	EEQIRIWFSNKRAKIKKS
>175.226.AAA	>175.121.AAC	>175.234.AAG	>175.174.AAT	>175.233.ACA	>175.178.ACC	>175.112.ACG	>175.131.ACT	>175.222.AGA	>175.213.AGC	>175.219.AGG	>175.230.AGT	>175.242.ATA	>175.38.ATC	>175.213.ATG	>175.132.ATT	>175.96.CAA	>175.75.CAC	>175.403.CAG	>175.121.CAT	>175.158.CCA	>175.332.CCC	>175.218.CCG	>175.134.CCT	>175.293.CGA	>175.245.CGC	>175.62.CGG	>175.249.CGT	>175.254.CTA	>175.39.CTC		>175.134.CTT	>175.67.GAA	>175.22.GAC	>175.69.GAG	>175.29.GAT	>175.30.GCA		>175.33.GCG	>175.30.GCT	>175.78.GGA	>175.24.GGC	>175.119.GGG	>175.84.GGT	>175.57.GTA	>175.36.GTC	>175.47.GTG	>175.95.GTT	>175.74.TAA	>175.87.TAC
ERQISTWFANKRHKIKKS	EQQISGWFRNKRFKIKKS	EKQILQWFWNKRFKIKKS	ERQIHNWFSNKRHKIKKS	EAQISNWFNNKRRKIKKS	EKQIQTWFCNKRKKIKKS	EVQIKRWFENKRRKIKKS	ELQIRSWFANKRNKIKKS	ERQIMYWFANKRSKIKKS	ETQIRRWFSNKRVKIKKS	ESQIAKWFENKRVKIKKS	ETQIRKWFENKRHKIKKS	ERQIAAWFANKRVKIKKS	ERQIRMWFANKRYKIKKS	EKQITYWFQNKRTKIKKS	EYQIKVWFQNKRAKIKKS	EPQIMYWFQNKRRKIKKS	ELQIHYWFTNKRRKIKKS	ETQISHWFWNKRRKIKKS	EKQIATWFSNKRRKIKKS	EQQIMHWFQNKRKKIKKS	ELQISNWFSNKRKKIKKS	EYQIINWFHNKRRKIKKS	EQQIANWFGNKRKKIKKS	EVQISYWFANKRMKIKKS	EGQIRNWFSNKRRKIKKS	ESQIARWFENKRRKIKKS	EMQIYYWFSNKRRKIKKS	ESQIHWWFANKRKKIKKS	ELQIAYWFSNKRKKIKKS		ELQIANWFSNKRKKIKKS	EQQINRWFQNKRWKIKKS	EVQIERWFRNKRWKIKKS	EVQIMRWFWNKRYKIKKS	ERQIAVWFRNKRWKIKKS	EKQIAKWFQNKRRKIKKS		EWQIGAWFKNKRYKIKKS	EWQIVAWFKNKRYKIKKS	ESQIVKWFDNKRQKIKKS	EGQILKWFNNKRQKIKKS	EKQIMKWFENKRSKIKKS	EKQIVKWFDNKRQKIKKS	ETQITRWFQNKRVKIKKS	ESQIGKWFRNKRWKIKKS	EGQIVKWFENKRWKIKKS	EEQIQKWFANKRYKIKKS	ERQIIVWFSNKRAKIKKS	EGQIRVWFSNKRAKIKKS
>176.226.AAA	>176.121.AAC	>176.231.AAG	>176.173.AAT	>176.232.ACA	>176.178.ACC	>176.108.ACG	>176.129.ACT	>176.221.AGA	>176.212.AGC	>176.219.AGG	>176.228.AGT	>176.239.ATA	>176.38.ATC	>176.213.ATG	>176.132.ATT	>176.96.CAA	>176.75.CAC	>176.392.CAG	>176.120.CAT	>176.158.CCA	>176.325.CCC	>176.217.CCG	>176.129.CCT	>176.292.CGA	>176.239.CGC	>176.62.CGG	>176.247.CGT	>176.253.CTA	>176.39.CTC		>176.134.CTT	>176.67.GAA	>176.22.GAC	>176.69.GAG	>176.28.GAT	>176.30.GCA		>176.32.GCG	>176.29.GCT	>176.77.GGA	>176.24.GGC	>176.117.GGG	>176.84.GGT	>176.57.GTA	>176.36.GTC	>176.47.GTG	>176.94.GTT	>176.74.TAA	>176.87.TAC
EIQIMYWFVNKRAKIKKS	ERQILSWFRNKRFKIKKS	ERQIMQWFWNKRSKIKKS	EVQIGRWFHNKRVKIKKS	ETQIVNWFNNKRRKIKKS	EKQISCWFHNKRVKIKKS	ERQIRHWFENKRRKIKKS	ERQIMSWFHNKRMKIKKS	ESQIFRWFANKRFKIKKS	ERQIMSWFSNKRVKIKKS	EKQISKWFENKRQKIKKS	ERQIRKWFENKRWKIKKS	EKQIFRWFANKRAKIKKS	ESQILSWFGNKRCKIKKS	EQQILLWF_NKRRKIKKS	EKQIRVWFQNKRQKIKKS	EVQIHHWFANKRRKIKKS	EVQISMWFRNKRRKIKKS	EKQISNWFWNKRRKIKKS	EVQILNWFSNKRRKIKKS	EAQIMHWFQNKRKKIKKS	ESQIRRWFENKRRKIKKS	EEQITNWFQNKRKKIKKS	EQQIADWFHNKRRKIKKS	EVQIANWFANKRRKIKKS	ELQISYWFNNKRRKIKKS	EKQITMWFENKRRKIKKS	ERQILYWFSNKRVKIKKS	ENQIFTWFANKRKKIKKS	ETQISYWFSNKRKKIKKS		ENQIQWWFGNKRSKIKKS	ERQINRWFQNKRWKIKKS	ETQIVRWFRNKRFKIKKS	EMQIGRWFWNKRYKIKKS	EFQIMKWFTNKRYKIKKS	ESQILRWFQNKRAKIKKS		ELQIADWFRNKRFKIKKS	EHQISDWFRNKRFKIKKS	EKQISKWFDNKRMKIKKS	EKQILKWFNNKRQKIKKS	EEQIAKWFENKRRKIKKS	ERQIIKWFNNKRAKIKKS	EQQIYHWFKNKRWKIKKS	ELQIGKWFRNKRSKIKKS	ERQIARWFENKRAKIKKS	ETQIVKWFGNKRWKIKKS	EQQIRVWFANKRAKIKKS	EQQIRVWFSNKRAKIKKS
>177.225.AAA	>177.121.AAC	>177.229.AAG	>177.170.AAT	>177.232.ACA	>177.176.ACC	>177.107.ACG	>177.128.ACT	>177.221.AGA	>177.211.AGC	>177.219.AGG	>177.228.AGT	>177.239.ATA	>177.37.ATC	>177.211.ATG	>177.131.ATT	>177.95.CAA	>177.75.CAC	>177.392.CAG	>177.120.CAT	>177.157.CCA	>177.324.CCC	>177.215.CCG	>177.129.CCT	>177.287.CGA	>177.239.CGC	>177.62.CGG	>177.237.CGT	>177.251.CTA	>177.39.CTC		>177.134.CTT	>177.67.GAA	>177.22.GAC	>177.69.GAG	>177.28.GAT	>177.30.GCA		>177.32.GCG	>177.29.GCT	>177.77.GGA	>177.24.GGC	>177.117.GGG	>177.84.GGT	>177.56.GTA	>177.36.GTC	>177.47.GTG	>177.94.GTT	>177.74.TAA	>177.87.TAC
ERQISTWFANKRHKIKKS	ELQISGWFRNKRFKIKKS	ETQIMQWFWNKRHKIKKS	ERQITSWFSNKRFKIKKS	EYQISAWFNNKRRKIKKS	EKQIGYWFHNKRQKIKKS	EKQIQYWFENKRRKIKKS	ERQIRDWFHNKRQKIKKS	EGQIFRWFANKRHKIKKS	ERQIIRWFNNKRVKIKKS	EKQIAKWFENKRRKIKKS	EKQIRKWFENKRMKIKKS	EVQILRWFANKRVKIKKS	EIQIVDWFFNKRLKIKKS	EYQISTWFTNKRSKIKKS	ERQIAVWFQNKRAKIKKS	EIQIMFWFQNKRRKIKKS	ERQILMWFSNKRRKIKKS	ETQITHWFSNKRAKIKKS	EPQIGNWFSNKRRKIKKS	EKQILQWFQNKRKKIKKS	EMQIQNWFSNKRKKIKKS	RTRSTTGSPTSGRRSRKS	EVQIINWFGNKRKKIKKS	ELQIFYWFSNKRAKIKKS	ELQIKYWFSNKRSKIKKS	EVQISRWFENKRRKIKKS	ERQIRDWFGNKRMKIKKS	EKQIFNWFANKRKKIKKS	EKQIRYWFENKRRKIKKS		EKQIYFWFSNKRRKIKKS	EKQIFHWFKNKRMKIKKS	EEQIVRWFRNKRWKIKKS	EGQIKRWFWNKRYKIKKS	EVQIMVWFRNKRYKIKKS	ERQILKWFQNKRGKIKKS		EHQIGAWFKNKRYKIKKS	ERQIIDWFRNKRFKIKKS	ELQISKWFDNKRYKIKKS	EQQISKWFSNKRQKIKKS	ERQILPWFSNKRMKIKKS	EGQITKWFDNKRQKIKKS	ENQIFGWFKNKRYKIKKS	EKQIGRWFRNKRFKIKKS	ELQIGKWFENKRWKIKKS	ECQIVRWFGNKRYKIKKS	EQQIATWFVNKRAKIKKS	EQQIRVWFSNKRSKIKKS
>178.225.AAA	>178.120.AAC	>178.229.AAG	>178.168.AAT	>178.229.ACA	>178.175.ACC	>178.107.ACG	>178.126.ACT	>178.221.AGA	>178.210.AGC	>178.217.AGG	>178.227.AGT	>178.236.ATA	>178.37.ATC	>178.210.ATG	>178.131.ATT	>178.95.CAA	>178.75.CAC	>178.387.CAG	>178.120.CAT	>178.157.CCA	>178.323.CCC	>178.213.CCG	>178.129.CCT	>178.287.CGA	>178.238.CGC	>178.62.CGG	>178.232.CGT	>178.246.CTA	>178.38.CTC		>178.133.CTT	>178.67.GAA	>178.22.GAC	>178.68.GAG	>178.28.GAT	>178.30.GCA		>178.32.GCG	>178.29.GCT	>178.76.GGA	>178.24.GGC	>178.114.GGG	>178.84.GGT	>178.56.GTA	>178.35.GTC	>178.47.GTG	>178.93.GTT	>178.74.TAA	>178.87.TAC
EKQISSWFANKRHKIKKS	ENQIGVWFRNKRFKIKKS	ESQIQQWFWNKRHKIKKS	ERQITAWFSNKRFKIKKS	ELQINNWFTNKRRKIKKS	EKQIMCWFHNKRVKIKKS	ERQIKYWFENKRRKIKKS	EAQISGWFHNKRMKIKKS	EVQIRRWFWNKRYKIKKS	EQQIGRWFNNKRVKIKKS	EQQICKWFENKRYKIKKS	ESQITKWFENKRWKIKKS	ERQIITWFQNKRVKIKKS	ELQINSWFPNKRVKIKKS	EVQIATWFMNKRAKIKKS	EAQIKIWFQNKRAKIKKS	EAQIANWFSNKRRKIKKS	EAQIAMWFRNKRRKIKKS	EKQIAWWFWNKRRKIKKS	ETQITSWFSNKRRKIKKS	EKQIRMWFENKRKKIKKS	ERQIRDWFSNKRKKIKKS	EPQIQYWFENKRKKIKKS	ELQISYWFSNKRKKIKKS	ELQIMYWFANKRAKIKKS	EVQIANWFSNKRRKIKKS	EVQISHWFENKRRKIKKS	ETQILNWFSNKRVKIKKS	ERQIFHWFANKRKKIKKS	EQQIRFWFANKRKKIKKS		ESQIKFWFGNKRSKIKKS	ESQILRWFQNKRFKIKKS	EYQIERWFRNKRWKIKKS	EQQIKQWFWNKRWKIKKS	EMQIGRWFINKRYKIKKS	ESQILRWFQNKRAKIKKS		EGQIMDWFRNKRHKIKKS	ETQIVVWFKNKRFKIKKS	EGQISKWFDNKRQKIKKS	ESQIMKWFNNKRCKIKKS	EVQISKWFENKRRKIKKS	EGQISKWFSNKRVKIKKS	EIQITRWFQNKRTKIKKS	EYQIRRWFSNKRRKIKKS	ELQISRWFENKRYKIKKS	EYQIQRWFGNKRAKIKKS	ERQITLWFRNKRQKIKKS	EKQIRLWFSNKRYKIKKS
>179.223.AAA	>179.120.AAC	>179.229.AAG	>179.167.AAT	>179.228.ACA	>179.173.ACC	>179.104.ACG	>179.125.ACT	>179.220.AGA	>179.209.AGC	>179.217.AGG	>179.227.AGT	>179.234.ATA	>179.37.ATC	>179.210.ATG	>179.130.ATT	>179.94.CAA	>179.74.CAC	>179.386.CAG	>179.119.CAT	>179.157.CCA	>179.321.CCC	>179.209.CCG	>179.128.CCT	>179.286.CGA	>179.238.CGC	>179.61.CGG	>179.232.CGT	>179.244.CTA	>179.38.CTC		>179.131.CTT	>179.67.GAA	>179.22.GAC	>179.68.GAG	>179.28.GAT	>179.29.GCA		>179.32.GCG	>179.29.GCT	>179.76.GGA	>179.23.GGC	>179.113.GGG	>179.84.GGT	>179.56.GTA	>179.35.GTC	>179.47.GTG	>179.92.GTT	>179.73.TAA	>179.86.TAC
ECQIKYWFVNKRHKIKKS	EVQIAQWFRNKRFKIKKS	EYQIMQWFWNKRFKIKKS	EKQILQWFSNKRWKIKKS	EMQIVNWFNNKRRKIKKS	ELQIRYWFENKRRKIKKS	ECQIRWWFDNKRRKIKKS	ETQIRKWFYNKRAKIKKS	ERQIRAWFNNKRWKIKKS	EFQIVLWFPNKRSKIKKS	ESQIMTWFRNKRLKIKKS	EKQIQKWFENKRYKIKKS	ERQIISWFANKRVKIKKS	EWQIRVWFQNKRGKIKKS	ELQIMVWFVNKRIKIKKS	EVQITIWFQNKRAKIKKS	EKQIMDWFANKRRKIKKS	ELQIAVWFRNKRRKIKKS	EKQIMYWFWNKRRKIKKS	EVQIMSWFSNKRRKIKKS	ETQIANWFSNKRKKIKKS	ERQIGNWFSNKRKKIKKS	EIQIIYWFENKRKKIKKS	EAQIINWFWNKRGKIKKS	ERQISNWFGNKRQKIKKS	ELQISYWFSNKRRKIKKS	ETQISHWFENKRRKIKKS	EIQIVYWFSNKRRKIKKS	ETQIRYWFSNKRKKIKKS	ERQIMYWFSNKRKKIKKS		ETQIANWFSNKRRKIKKS	EGQILRWFQNKRWKIKKS	EKQIERWFRNKRWKIKKS	EIQIATWFVNKRYKIKKS	EKQISKWFVNKRWKIKKS	EPQIRKWFQNKRWKIKKS		EGQISDWFRNKRYKIKKS	EAQIGDWFRNKRYKIKKS	EKQISKWFDNKRAKIKKS	EEQIRKWFSNKRAKIKKS	EKQINKWFENKRSKIKKS	EGQIVKWFNNKRAKIKKS	EKQIGRWFQNKRSKIKKS	EIQIRRWFGNKRAKIKKS	EGQICKWFENKRFKIKKS	ESQISSWFANKRFKIKKS	EAQIRRWFINKRMKIKKS	ETQIRVWFSNKRAKIKKS
>180.220.AAA	>180.120.AAC	>180.228.AAG	>180.164.AAT	>180.228.ACA	>180.173.ACC	>180.104.ACG	>180.123.ACT	>180.218.AGA	>180.204.AGC	>180.213.AGG	>180.224.AGT	>180.234.ATA	>180.35.ATC	>180.210.ATG	>180.130.ATT	>180.94.CAA	>180.74.CAC	>180.385.CAG	>180.119.CAT	>180.157.CCA	>180.321.CCC	>180.209.CCG	>180.128.CCT	>180.280.CGA	>180.232.CGC	>180.60.CGG	>180.231.CGT	>180.243.CTA	>180.37.CTC		>180.130.CTT	>180.66.GAA	>180.22.GAC	>180.68.GAG	>180.28.GAT	>180.29.GCA		>180.32.GCG	>180.29.GCT	>180.75.GGA	>180.23.GGC	>180.113.GGG	>180.83.GGT	>180.56.GTA	>180.35.GTC	>180.46.GTG	>180.92.GTT	>180.73.TAA	>180.86.TAC
EGQISQWFANKRFKIKKS	ERQIVSWFRNKRFKIKKS	EHQIMQWFWNKRAKIKKS	EKQIAVWFNNKRFKIKKS	EKQIASWFHNKRSKIKKS	EKQILSWFHNKRSKIKKS	ESQIRHWFENKRRKIKKS	EKQIMTWFHNKRMKIKKS	ERQIAQWFWNKRYKIKKS	ETQIARWFNNKRVKIKKS	EYQIKAWFKNKRFKIKKS	EAQIRKWFENKRWKIKKS	ERQITTWFANKRHKIKKS	ELQIRAWFTNKRLKIKKS	ELQITYWFQNKRQKIKKS	EQQITIWFQNKRQKIKKS	EVQIGYWFQNKRRKIKKS	EGQIMDWFKNKRRKIKKS	ERQISHWFWNKRRKIKKS	EQQILNWFSNKRRKIKKS	ELQITYWFNNKRKKIKKS	ESQISRWFENKRRKIKKS	ERQIMMWFENKRKKIKKS	ELQISNWFSNKRKKIKKS	ELQIRYWFANKRMKIKKS	ERQIAMWFSNKRRKIKKS	EVQILRWFENKRRKIKKS	ERQIAMWFNNKRRKIKKS	ELQITYWFNNKRKKIKKS	EQQILYWFANKRKKIKKS		ECQIAYWFGNKRKKIKKS	ELQIHNWFKNKRWKIKKS	ENQINRWFRNKRWKIKKS	EEQIKQWFWNKRYKIKKS	EVQIGVWFRNKRYKIKKS	EPQILKWFQNKRRKIKKS		EIQIGVWFANKRHKIKKS	ETQIRAWFKNKRFKIKKS	EKQIAKWFDNKRQKIKKS	ERQIVKWFNNKRLKIKKS	EGQIAKWFENKRAKIKKS	ERQILKWFNNKRAKIKKS	ELQIARWFQNKRVKIKKS	EVQIKEWFGNKRFKIKKS	EEQIRKWFENKRWKIKKS	ETQINIWFRNKRYKIKKS	ERQILTWFANKRAKIKKS	EKQIRLWFSNKRFKIKKS
>181.220.AAA	>181.119.AAC	>181.227.AAG	>181.164.AAT	>181.227.ACA	>181.173.ACC	>181.103.ACG	>181.122.ACT	>181.216.AGA	>181.200.AGC	>181.208.AGG	>181.223.AGT	>181.233.ATA	>181.35.ATC	>181.208.ATG	>181.129.ATT	>181.93.CAA	>181.73.CAC	>181.377.CAG	>181.119.CAT	>181.156.CCA	>181.320.CCC	>181.208.CCG	>181.128.CCT	>181.278.CGA	>181.230.CGC	>181.60.CGG	>181.229.CGT	>181.242.CTA	>181.36.CTC		>181.130.CTT	>181.66.GAA	>181.21.GAC	>181.67.GAG	>181.28.GAT	>181.29.GCA		>181.32.GCG	>181.29.GCT	>181.75.GGA	>181.23.GGC	>181.112.GGG	>181.83.GGT	>181.56.GTA	>181.35.GTC	>181.46.GTG	>181.91.GTT	>181.72.TAA	>181.84.TAC
EIQISAWFANKRFKIKKS	ELQIGAWFRNKRFKIKKS	ELQIMQWFWNKRFKIKKS	EKQISGWFNNKRFKIKKS	EMQIKNWFNNKRRKIKKS	ENQISGWFSNKRKKIKKS	EDQISGWFRNKRIKIKKS	EEQILLWFRNKRVKIKKS	EMQIKRWFWNKRYKIKKS	ERQILCWFSNKRVKIKKS	EYQILKWFENKRYKIKKS	EMQIGKWFMNKRWKIKKS	EYQITHWFANKRAKIKKS	EGQIKAWFRNKRLKIKKS	EWQIRRWFPNKRRKIKKS	ERQILVWFQNKRAKIKKS	EIQIMMWFQNKRRKIKKS	EGQISMWFRNKRRKIKKS	EQQISWWFWNKRRKIKKS	EVQIANWFSNKRRKIKKS	EMQITNWFANKRKKIKKS	ERQILNWFSNKRKKIKKS	ETQIKDWFQNKRKKIKKS	EVQICNWFANKRKKIKKS	EKQIFNWFSNKRRKIKKS	ETQIMQWFSNKRRKIKKS	EKQIARWFENKRRKIKKS	EKQIVMWFNNKRRKIKKS	EVQIASWFANKRRKIKKS	ERQIMTWFSNKRKKIKKS		EVQIMCWFSNKRRKIKKS	EEQILRWFQNKRWKIKKS	EAQIGRWFRNKRWKIKKS	EIQIGRWFMNKRYKIKKS	ETQIMMWFRNKRYKIKKS	EKQICKWFQNKRVKIKKS		EEQIRRWFKNKRFKIKKS	ESQILVWFKNKRFKIKKS	EGQIRKWFDNKRQKIKKS	EYQILKWFNNKRLKIKKS	EMQIGKWFENKRRKIKKS	ESQISKWFNNKRMKIKKS	EWQIMKWFQNKRSKIKKS	EHQIAKWFRNKRWKIKKS	EEQIRKWFENKRRKIKKS	ERQIAVWFANKRYKIKKS	ERQILVWFQNKRAKIKKS	ETQIVHWFWNKRYKIKKS
>182.218.AAA	>182.119.AAC	>182.227.AAG	>182.163.AAT	>182.226.ACA	>182.170.ACC	>182.103.ACG	>182.121.ACT	>182.215.AGA	>182.197.AGC	>182.208.AGG	>182.221.AGT	>182.232.ATA	>182.35.ATC	>182.204.ATG	>182.129.ATT	>182.93.CAA	>182.73.CAC	>182.375.CAG	>182.119.CAT	>182.156.CCA	>182.319.CCC	>182.206.CCG	>182.127.CCT	>182.278.CGA	>182.229.CGC	>182.59.CGG	>182.229.CGT	>182.239.CTA	>182.36.CTC		>182.129.CTT	>182.66.GAA	>182.21.GAC	>182.67.GAG	>182.28.GAT	>182.29.GCA		>182.32.GCG	>182.29.GCT	>182.74.GGA	>182.23.GGC	>182.112.GGG	>182.83.GGT	>182.56.GTA	>182.35.GTC	>182.46.GTG	>182.91.GTT	>182.72.TAA	>182.82.TAC
ERQIAHWFVNKRHKIKKS	ERQINAWFRNKRFKIKKS	EMQIMQWFWNKRFKIKKS	ERQILAWFNNKRFKIKKS	EMQINNWFNNKRRKIKKS	ETQILNWFHNKRMKIKKS	ELQIFTWFGNKRVKIKKS	EAQIGIWFRNKRTKIKKS	EKQIRQWFWNKRWKIKKS	ERQILRWFSNKRVKIKKS	EHQIRVWFKNKRYKIKKS	ECQITYWFRNKRLKIKKS	EGQIRSWFANKRSKIKKS	EVQIGCWFGNKRAKIKKS	EPQITSWFYNKRSKIKKS	EVQIKVWFQNKRSKIKKS	ERQIMTWFQNKRRKIKKS	ERQIGMWFRNKRRKIKKS	EKQIMQWFWNKRRKIKKS	ESQISMWFSNKRRKIKKS	ERQISTWFQNKRKKIKKS	EVQIMTWFSNKRKKIKKS	ELQILNWFQNKRKKIKKS	ESQISDWFSNKRKKIKKS	ESQIFYWFANKRKKIKKS	EGQIRDWFSNKRRKIKKS	EWQIEMWFSNKRLKIKKS	EKQIVDWFSNKRRKIKKS	ESQIHNWFCNKRRKIKKS	ERQIRYWFSNKRKKIKKS		ENQINFWFGNKRRKIKKS	EWQILRWFQNKRWKIKKS	EEQINRWFRNKRFKIKKS	ELQIMTWFWNKRYKIKKS	EGQISRWFINKRYKIKKS	EEQIYNWFRNKRYKIKKS		ERQISDWFRNKRAKIKKS	EGQIMDWFRNKRYKIKKS	EVQITQWFENKRGKIKKS	EMQISKWFNNKRMKIKKS	EKQIAKWFENKRRKIKKS	ELQITKWFDNKRYKIKKS	ENQINRWFQNKRVKIKKS	ERQIYFWFENKRCKIKKS	ESQIAKWFENKRQKIKKS	EYQIGKWFANKRFKIKKS	ETQIRFWFQNKRQKIKKS	ETQIRLWFSNKRAKIKKS
>183.215.AAA	>183.119.AAC	>183.224.AAG	>183.163.AAT	>183.226.ACA	>183.166.ACC	>183.103.ACG	>183.120.ACT	>183.214.AGA	>183.196.AGC	>183.207.AGG	>183.221.AGT	>183.231.ATA	>183.34.ATC	>183.203.ATG	>183.129.ATT	>183.93.CAA	>183.73.CAC	>183.368.CAG	>183.119.CAT	>183.156.CCA	>183.318.CCC	>183.206.CCG	>183.127.CCT	>183.278.CGA	>183.224.CGC	>183.58.CGG	>183.227.CGT	>183.237.CTA	>183.36.CTC		>183.128.CTT	>183.66.GAA	>183.21.GAC	>183.67.GAG	>183.28.GAT	>183.29.GCA		>183.32.GCG	>183.29.GCT	>183.73.GGA	>183.23.GGC	>183.110.GGG	>183.82.GGT	>183.56.GTA	>183.35.GTC	>183.45.GTG	>183.91.GTT	>183.72.TAA	>183.82.TAC
EKQIYYWFVNKRAKIKKS	ERQIQTWFRNKRFKIKKS	EVQIMQWFWNKRFKIKKS	EKQIVVWFTNKRFKIKKS	EGQIHSWFANKRHKIKKS	ERQISCWFHNKRNKIKKS	ELQIRHWFENKRRKIKKS	EIQIKHWFENKRKKIKKS	EWQISAWFKNKRYKIKKS	EAQISRWFNNKRVKIKKS	EPQISKWFENKRRKIKKS	EAQIWMWFLNKRLKIKKS	EKQILQWFANKRQKIKKS	EWQIYVWFKNKRMKIKKS	ETQIIYWFQNKRAKIKKS	EVQIKVWFQNKRAKIKKS	EKQIYNWFVNKRRKIKKS	ERQIADWFRNKRRKIKKS	ERQIKYWFWNKRRKIKKS	EKQILTWFSNKRRKIKKS	ELQITHWFQNKRKKIKKS	EQQISNWFSNKRKKIKKS	EAQIRYWFENKRKKIKKS	ETQIGDWFSNKRKKIKKS	EVQIFYWFANKRVKIKKS	ENQIAYWFSNKRRKIKKS	EMQISHWFENKRRKIKKS	EKQIRYWFSNKRVKIKKS	EQQISFWFANKRKKIKKS	ESQIANWFSNKRKKIKKS		ESQITYWFGNKRKKIKKS	EVQISRWFQNKRWKIKKS	ELQITRWFRNKRFKIKKS	ETQIQRWFWNKRWKIKKS	ESQIARWFLNKRYKIKKS	ERQIFNWFRNKRYKIKKS		ERQILDWFRNKRHKIKKS	EKQITTWFHNKRFKIKKS	EMQIAKWFDNKRFKIKKS	ERQITKWFSNKRVKIKKS	ELQILKWFENKRRKIKKS	EQQIAKWFNNKRMKIKKS	ERQISKWFQNKRRKIKKS	EYQIIRWFANKRFKIKKS	ELQIARWFENKRFKIKKS	EAQIVRWFGNKRYKIKKS	ERQIAIWFVNKRSKIKKS	EMQIRVWFSNKRAKIKKS
>184.214.AAA	>184.119.AAC	>184.223.AAG	>184.161.AAT	>184.223.ACA	>184.162.ACC	>184.101.ACG	>184.118.ACT	>184.214.AGA	>184.195.AGC	>184.207.AGG	>184.220.AGT	>184.231.ATA	>184.34.ATC	>184.203.ATG	>184.128.ATT	>184.93.CAA	>184.73.CAC	>184.368.CAG	>184.119.CAT	>184.155.CCA	>184.317.CCC	>184.201.CCG	>184.124.CCT	>184.277.CGA	>184.222.CGC	>184.57.CGG	>184.222.CGT	>184.235.CTA	>184.36.CTC		>184.128.CTT	>184.66.GAA	>184.21.GAC	>184.66.GAG	>184.28.GAT	>184.29.GCA		>184.32.GCG	>184.29.GCT	>184.73.GGA	>184.23.GGC	>184.110.GGG	>184.82.GGT	>184.56.GTA	>184.34.GTC	>184.45.GTG	>184.90.GTT	>184.71.TAA	>184.82.TAC
EKQIIYWFVNKRHKIKKS	EGQITSWFRNKRFKIKKS	EKQIQQWFWNKRYKIKKS	ENQINSWFTNKRFKIKKS	EKQILNWFNNKRAKIKKS	ERQIKYWFENKRRKIKKS	ECQIKWWFENKRRKIKKS	EWQIKMWFANKRLKIKKS	ELQIRRWFWNKRFKIKKS	EVQIARWFNNKRVKIKKS	_TRGRSGLGNKRIKIKKS	ERQIVVWFQNKRYKIKKS	EAQITYWFQNKRVKIKKS	ELQIHIWFKNKRHKIKKS	ERQIAYWFQNKRWKIKKS	ERQIHIWFQNKRSKIKKS	ERQISDWFANKRRKIKKS	ELQISNWFRNKRRKIKKS	EVQISHWFWNKRRKIKKS	EQQIHNWFSNKRRKIKKS	ETQIANWFANKRKKIKKS	EGQIRDWFSNKRKKIKKS	EVQIVYWFENKRKKIKKS	EMQIMNWFSNKRKKIKKS	ERQIFYWFANKRNKIKKS	ETQIKDWFSNKRRKIKKS	EKQIENWFSNKRRKIKKS	ERQISYWFNNKRKKIKKS	ELQIAYWFSNKRKKIKKS	ERQIRYWFSNKRKKIKKS		EVQIMNWFSNKRKKIKKS	EFQIKRWFQNKRWKIKKS	EVQIQRWFRNKRWKIKKS	ERQIVRWFWNKRYKIKKS	ETQILRWFNNKRYKIKKS	EAQIVRWFQNKRAKIKKS		EQQISHWFCNKRYKIKKS	ENQIYAWFKNKRYKIKKS	EVQIGKWFDNKRQKIKKS	EEQIRKWFNNKRWKIKKS	EAQIRKWFENKRRKIKKS	ERQISKWFSNKREKIKKS	ESQINRWFQNKRMKIKKS	EMQIIIWFTNKRVKIKKS	ELQISRWFENKRYKIKKS	ESQIGAWFRNKRYKIKKS	ERQITVWFCNKRAKIKKS	EQQIRIWFSNKRAKIKKS
>185.214.AAA	>185.118.AAC	>185.222.AAG	>185.160.AAT	>185.222.ACA	>185.161.ACC	>185.101.ACG	>185.113.ACT	>185.213.AGA	>185.195.AGC	>185.205.AGG	>185.218.AGT	>185.231.ATA	>185.34.ATC	>185.201.ATG	>185.126.ATT	>185.91.CAA	>185.73.CAC	>185.364.CAG	>185.119.CAT	>185.155.CCA	>185.317.CCC	>185.200.CCG	>185.124.CCT	>185.275.CGA	>185.221.CGC	>185.55.CGG	>185.220.CGT	>185.235.CTA	>185.35.CTC		>185.125.CTT	>185.66.GAA	>185.21.GAC	>185.64.GAG	>185.28.GAT	>185.29.GCA		>185.31.GCG	>185.29.GCT	>185.73.GGA	>185.23.GGC	>185.107.GGG	>185.82.GGT	>185.55.GTA	>185.34.GTC	>185.45.GTG	>185.89.GTT	>185.71.TAA	>185.81.TAC
ERQIIYWFVNKRHKIKKS	ESQINSWFRNKRFKIKKS	ERQIRQWFWNKRFKIKKS	EKQIMSWFSNKRFKIKKS	EVQIRHWFQNKRRKIKKS	ERQI_DWFFNKRIKIKKS	EWQIRGWFRNKRMKIKKS	EKQIKYWFENKRRKIKKS	ERQIRQWFWNKRYKIKKS	EKQILTWFSNKRVKIKKS	EQQIAKWFENKRYKIKKS	EMQIRKWFENKRFKIKKS	EAQISRWFANKRVKIKKS	ELQIGLWFGNKRLKIKKS	EKQIQFWFQNKRTKIKKS	ERQIHIWFQNKRAKIKKS	ELQIANWFSNKRRKIKKS	EVQIGQWFRNKRRKIKKS	ESQISNWFWNKRRKIKKS	ESQIANWFSNKRRKIKKS	ERQIVNWFANKRKKIKKS	ELQILYWFSNKRKKIKKS	EKQIRYWFENKRRKIKKS	EVQISNWFSNKRKKIKKS	EKQIFHWFANKRKKIKKS	EAQIRDWFSNKRRKIKKS	EKQISRWFENKRRKIKKS	ERQILNWFSNKRRKIKKS	ERQIAYWFANKRRKIKKS	ETQIQMWFSNKRKKIKKS		ERQISCWFANKRKKIKKS	ELQIVRWFQNKRWKIKKS	ESQIQRWFRNKRWKIKKS	EWQIGRWFMNKRYKIKKS	ELQIMHWFRNKRFKIKKS	EQQITRWFQNKRMKIKKS		EWQIVAWFKNKRYKIKKS	ERQIIDWFRNKRYKIKKS	ERQIAKWFDNKRLKIKKS	EYQIMKWFNNKRTKIKKS	EKQISKWFENKRRKIKKS	EQQICKWFNNKRCKIKKS	EKQILRWFQNKRMKIKKS	EYQIMRWFSNKRAKIKKS	EQQILKWFQNKRSKIKKS	EIQIVRWFSNKRAKIKKS	ERQISTWFANKRSKIKKS	EGQIRIWFSNKRAKIKKS
>186.213.AAA	>186.118.AAC	>186.221.AAG	>186.160.AAT	>186.220.ACA	>186.160.ACC	>186.99.ACG	>186.113.ACT	>186.213.AGA	>186.191.AGC	>186.205.AGG	>186.216.AGT	>186.231.ATA	>186.34.ATC	>186.199.ATG	>186.123.ATT	>186.91.CAA	>186.73.CAC	>186.363.CAG	>186.119.CAT	>186.153.CCA	>186.312.CCC	>186.198.CCG	>186.124.CCT	>186.274.CGA	>186.221.CGC	>186.54.CGG	>186.219.CGT	>186.234.CTA	>186.35.CTC		>186.125.CTT	>186.66.GAA	>186.21.GAC	>186.64.GAG	>186.28.GAT	>186.28.GCA		>186.31.GCG	>186.29.GCT	>186.73.GGA	>186.22.GGC	>186.105.GGG	>186.82.GGT	>186.55.GTA	>186.34.GTC	>186.44.GTG	>186.89.GTT	>186.70.TAA	>186.80.TAC
EAQITCWFANKRHKIKKS	EGQIMAWFRNKRFKIKKS	ERQISQWFWNKRFKIKKS	TSPDRVWFPNKRGKIKKS	EAQINQWFQNKRRKIKKS	EKQIVAWFHNKRSKIKKS	EKQIQYWFENKRRKIKKS	EFQISFWFPNKRLKIKKS	ETQIHRWFANKRFKIKKS	ESQIRSWFSNKRTKIKKS	ERQINKWFENKRRKIKKS	EIQIKKWFENKRWKIKKS	EQQIKYWFANKRQKIKKS	ETQIHRWFRNKRTKIKKS	ESQIALWFTNKREKIKKS	EQQIKVWFQNKRMKIKKS	ELQISYWFGNKRRKIKKS	EEQISMWFRNKRRKIKKS	ERQIAIWFANKRSKIKKS	ERQIRDWFGNKRRKIKKS	EVQIAQWFQNKRKKIKKS	ERQIHNWFSNKRKKIKKS	EKQITNWFQNKRKKIKKS	EQQIVNWFANKRKKIKKS	EEQIFYWFANKRRKIKKS	ETQIRNWFSNKRVKIKKS	ERQIAHWFENKRRKIKKS	EKQIMNWFGNKRMKIKKS	ERQISFWFANKRKKIKKS	EQQIYNWFANKRKKIKKS		ERQIMYWFMNKRKKIKKS	EAQILRWFQNKRHKIKKS	ESQIRRWFRNKRFKIKKS	EMQISRWFWNKRYKIKKS	ELQILSWFRNKRYKIKKS	EMQIYDWFRNKRAKIKKS		EMQIMDWFRNKRYKIKKS	ERQINDWFRNKRYKIKKS	EGQITKWFDNKRQKIKKS	ETQITKWFSNKREKIKKS	EKQIVKWFENKRRKIKKS	EGQIAKWFDNKRCKIKKS	ERQIRRWFDNKRWKIKKS	ERQIQRWFGNKRAKIKKS	ESQISKWFENKRWKIKKS	EGQIRVWFANKRYKIKKS	EKQIATWFVNKRAKIKKS	ESQIRVWFSNKRAKIKKS
>187.213.AAA	>187.117.AAC	>187.220.AAG	>187.159.AAT	>187.220.ACA	>187.160.ACC	>187.97.ACG	>187.112.ACT	>187.212.AGA	>187.191.AGC	>187.205.AGG	>187.215.AGT	>187.230.ATA	>187.33.ATC	>187.199.ATG	>187.121.ATT	>187.91.CAA	>187.73.CAC	>187.361.CAG	>187.118.CAT	>187.151.CCA	>187.312.CCC	>187.195.CCG	>187.122.CCT	>187.273.CGA	>187.221.CGC	>187.54.CGG	>187.216.CGT	>187.231.CTA	>187.34.CTC		>187.123.CTT	>187.65.GAA	>187.21.GAC	>187.64.GAG	>187.28.GAT	>187.28.GCA		>187.31.GCG	>187.29.GCT	>187.72.GGA	>187.22.GGC	>187.104.GGG	>187.81.GGT	>187.55.GTA	>187.34.GTC	>187.44.GTG	>187.88.GTT	>187.70.TAA	>187.79.TAC
EGQILCWFANKRHKIKKS	EQQIGCWFRNKRHKIKKS	EVQIATWFVNKRWKIKKS	ERQISYWFVNKRHKIKKS	EKQIQMWFWNKRRKIKKS	EKQITSWFHNKRMKIKKS	ELQIKRWFENKRRKIKKS	ESQIKNWFRNKRAKIKKS	ETQIFYWFANKRHKIKKS	EMQIARWFSNKRVKIKKS	TPAAEQRARP_TEKIKKS	EKQITKWFENKRFKIKKS	EYQIKVWFNNKRAKIKKS	EKQITVWFVNKRSKIKKS	EKQIQSWFQNKRCKIKKS	ETQIKVWFQNKRAKIKKS	EVQIAMWFANKRRKIKKS	ELQISMWFSNKRRKIKKS	EKQISYWFWNKRRKIKKS	EFQIATWFSNKRRKIKKS	EQQITTWFQNKRKKIKKS	ERQIGDWFSNKRKKIKKS	EMQISNWFQNKRKKIKKS	EKQIQDWFANKRKKIKKS	EKQIHYWFSNKRMKIKKS	ERQIYNWFSNKRRKIKKS	ETQIIHWFENKRRKIKKS	ERQITDWFSNKRRKIKKS	EIQITYWFSNKRKKIKKS	ERQIQMWFANKRKKIKKS		EVQITYWFSNKRSKIKKS	EEQIIRWFQNKRWKIKKS	EAQITRWFRNKRWKIKKS	ERQIMCWFWNKRYKIKKS	ESQIMRWFLNKRYKIKKS	EIQILRWFQNKRAKIKKS		EKQILDWFRNKRYKIKKS	EWQIGVWFKNKRYKIKKS	ECQISKWFDNKRWKIKKS	EKQIVKWFSNKRQKIKKS	EQQITKWFENKRRKIKKS	EGQISKWFSNKREKIKKS	EWQIIRWFQNKRSKIKKS	ENQIARWFGNKRAKIKKS	ERQIQRWFENKRFKIKKS	ESQIRAWFANKRYKIKKS	ERQIVLWFRNKRSKIKKS	ESQIRVWFSNKRVKIKKS
>188.212.AAA	>188.117.AAC	>188.219.AAG	>188.155.AAT	>188.219.ACA	>188.156.ACC	>188.96.ACG	>188.112.ACT	>188.212.AGA	>188.190.AGC	>188.204.AGG	>188.209.AGT	>188.229.ATA	>188.33.ATC	>188.197.ATG	>188.119.ATT	>188.91.CAA	>188.72.CAC	>188.360.CAG	>188.118.CAT	>188.151.CCA	>188.311.CCC	>188.192.CCG	>188.122.CCT	>188.271.CGA	>188.217.CGC	>188.53.CGG	>188.213.CGT	>188.229.CTA	>188.34.CTC		>188.122.CTT	>188.65.GAA	>188.21.GAC	>188.62.GAG	>188.28.GAT	>188.28.GCA		>188.31.GCG	>188.28.GCT	>188.72.GGA	>188.22.GGC	>188.104.GGG	>188.81.GGT	>188.55.GTA	>188.34.GTC	>188.44.GTG	>188.88.GTT	>188.70.TAA	>188.78.TAC
ETQIYYWFVNKRHKIKKS	ESQITSWFRNKRFKIKKS	ERQIMQWFWNKRAKIKKS	EQQIISWFSNKRHKIKKS	EKQISNWFHNKRTKIKKS	ERQIRFWFENKRRKIKKS	EVQIKWWFENKRRKIKKS	EKQICTWFHNKRMKIKKS	ESQIFRWFANKRHKIKKS	EQQILRWFNNKRVKIKKS	ERQILKWFENKRQKIKKS	ETQINRWFSNKRVKIKKS	ERQIFSWFANKRSKIKKS	ELQIKNWFGNKRWKIKKS	EKQIVYWFQNKRFKIKKS	EQQIKIWFQNKRRKIKKS	EQQIFQWFANKRRKIKKS	ELQIAMWFRNKRRKIKKS	ERQISYWFWNKRRKIKKS	ETQISNWFGNKRRKIKKS	ETQITNWFGNKRKKIKKS	ERQINNWFSNKRKKIKKS	ERQITYWFENKRRKIKKS	ERQILDWFGNKRKKIKKS	EMQIFNWFANKRRKIKKS	ERQIYLWFNNKRRKIKKS	EQQINRWFENKRRKIKKS	ERQIINWFSNKRRKIKKS	ELQINNWFANKRKKIKKS	ETQISYWFSNKRKKIKKS		EQQIMMWFNNKRRKIKKS	EMQIVRWFQNKRWKIKKS	EQQIIRWFRNKRWKIKKS	ERQIAQWFWNKRWKIKKS	EKQIIMWFRNKRYKIKKS	EGQILKWFQNKRMKIKKS		ESQIRLWFCNKRRKIKKS	ERQISDWFRNKRFKIKKS	EAQISFWFANKRLKIKKS	EVQIQKWFNNKRQKIKKS	EGQIPWWFVNKRTKIKKS	ELQISKWFDNKRQKIKKS	EMQIGKWFQNKRCKIKKS	EVQINKWFKNKRYKIKKS	EVQIMRWFENKRYKIKKS	EWQICKWFANKRFKIKKS	ERQIFVWFANKRAKIKKS	EGQIRVWFSNKRAKIKKS
>189.211.AAA	>189.117.AAC	>189.219.AAG	>189.154.AAT	>189.219.ACA	>189.155.ACC	>189.95.ACG	>189.111.ACT	>189.211.AGA	>189.190.AGC	>189.203.AGG	>189.206.AGT	>189.228.ATA	>189.33.ATC	>189.197.ATG	>189.118.ATT	>189.91.CAA	>189.72.CAC	>189.352.CAG	>189.118.CAT	>189.151.CCA	>189.308.CCC	>189.191.CCG	>189.122.CCT	>189.271.CGA	>189.216.CGC	>189.53.CGG	>189.213.CGT	>189.229.CTA	>189.34.CTC		>189.121.CTT	>189.65.GAA	>189.21.GAC	>189.61.GAG	>189.27.GAT	>189.28.GCA		>189.31.GCG	>189.28.GCT	>189.72.GGA	>189.22.GGC	>189.103.GGG	>189.81.GGT	>189.55.GTA	>189.34.GTC	>189.43.GTG	>189.87.GTT	>189.69.TAA	>189.78.TAC
EKQIDTWFANKRFKIKKS	ETQILSWFRNKRFKIKKS	EKQIVQWFWNKRWKIKKS	EAQIKQWFANKRFKIKKS	ERQIKDWFNNKRRKIKKS	EKQISAWFHNKRMKIKKS	ERQIVNWFENKRRKIKKS	ETQISSWFINKRFKIKKS	REEILLWFGNKRTKIKKS	ERQIRSWFSNKRVKIKKS	EWQIVAWFKNKRYKIKKS	ERQIKKWFENKRCKIKKS	EQQIFSWFANKRSKIKKS	EKQIKVWFNNKRRKIKKS	EAQIVYWFQNKRWKIKKS	ERQITVWFQNKRSKIKKS	ETQIMFWFQNKRAKIKKS	ERQIVMWFSNKRRKIKKS	ECQIKYWFWNKRRKIKKS	EMQIINWFSNKRRKIKKS	ESQISNWFANKRKKIKKS	ECQILNWFSNKRKKIKKS	EKQITYWFENKRKKIKKS	EVQIRDWFSNKRKKIKKS	EGQIFHWFANKRRKIKKS	ERQIYYWFNNKRKKIKKS	ERQIVTWFENKRRKIKKS	ERQITYWFSNKRAKIKKS	EKQIIYWFANKRKKIKKS	EKQITYWFENKRKKIKKS		EWQIQYWFGNKRKKIKKS	ESQIRRWFQNKRWKIKKS	EEQIGRWFRNKRFKIKKS	EKQICQWFWNKRYKIKKS	EEQIAKWFVNKRFKIKKS	EVQIMKWFQNKRQKIKKS		EWQISTWFKNKRFKIKKS	EKQITIWFKNKRWKIKKS	EYQIEAWFVNKRLKIKKS	ETQITKWFNNKRQKIKKS	EAQITKWFENKRRKIKKS	EVQIGKWFNNKRSKIKKS	EGQIARWFQNKRSKIKKS	EVQISKWFRNKRWKIKKS	ELQIRIWFQNKRFKIKKS	ENQIKAWFSNKRYKIKKS	RPQIIVWFANKRGKIKKS	ETQIRLWFSNKRYKIKKS
>190.209.AAA	>190.117.AAC	>190.218.AAG	>190.152.AAT	>190.219.ACA	>190.154.ACC	>190.94.ACG	>190.111.ACT	>190.211.AGA	>190.190.AGC	>190.200.AGG	>190.206.AGT	>190.227.ATA	>190.32.ATC	>190.197.ATG	>190.118.ATT	>190.90.CAA	>190.72.CAC	>190.350.CAG	>190.117.CAT	>190.150.CCA	>190.307.CCC	>190.190.CCG	>190.122.CCT	>190.271.CGA	>190.215.CGC	>190.53.CGG	>190.212.CGT	>190.229.CTA	>190.34.CTC		>190.121.CTT	>190.65.GAA	>190.21.GAC	>190.61.GAG	>190.27.GAT	>190.28.GCA		>190.31.GCG	>190.28.GCT	>190.71.GGA	>190.22.GGC	>190.100.GGG	>190.81.GGT	>190.54.GTA	>190.33.GTC	>190.43.GTG	>190.86.GTT	>190.68.TAA	>190.78.TAC
ELQISYWFVNKRHKIKKS	EVQIGAWFRNKRFKIKKS	ERQIMQWFWNKRAKIKKS	ERQILNWFNNKRHKIKKS	EMQIKRWFWNKRRKIKKS	ERQISSWFHNKRTKIKKS	EKQIIYWFENKRRKIKKS	EYQIMNWFHNKRTKIKKS	EVQIFRWFANKRQKIKKS	ERQITRWFNNKRVKIKKS	ERQIAKWFENKRAKIKKS	ERQIKRWFENKRYKIKKS	EVQIAGWFGNKRDKIKKS	EIQILLWFNNKRFKIKKS	EIQIGTWFTNKRTKIKKS	ERQITVWFQNKRTKIKKS	EVQIFTWFANKRRKIKKS	EAQIRMWFSNKRRKIKKS	ECQISWWFWNKRRKIKKS	EGQILQWFSNKRRKIKKS	ETQIMFWFQNKRKKIKKS	ESQIMNWFSNKRKKIKKS	ETQINDWFSNKRKKIKKS	EVQIRDWFSNKRKKIKKS	ERQIFYWFANKRLKIKKS	ERQIVGWFSNKRRKIKKS	ELQITRWFENKRRKIKKS	EKQIGGWFNNKRRKIKKS	EKQIGFWFSNKRKKIKKS	ERQIQYWFGNKRKKIKKS		ETQIANWFGNKRKKIKKS	ERQIQRWFQNKRWKIKKS	EAQIRRWFRNKRWKIKKS	ERQISAWFWNKRYKIKKS	EEQISVWFRNKRYKIKKS	EHQIVRWFQNKRFKIKKS		ESQISDWFRNKRFKIKKS	EYQIVNWFRNKRCKIKKS	ERQISKWFDNKRAKIKKS	EFQIPWWFANKRAKIKKS	EVQIMKWFENKRWKIKKS	EKQITKWFSNKREKIKKS	ELQIRRWFENKRAKIKKS	EGQICKWFKNKRYKIKKS	ERQICKWFENKRWKIKKS	EQQINRWFGNKRAKIKKS	ERQISNWFSNKRAKIKKS	EQQIRVWFSNKRVKIKKS
>191.208.AAA	>191.117.AAC	>191.217.AAG	>191.151.AAT	>191.219.ACA	>191.153.ACC	>191.93.ACG	>191.110.ACT	>191.210.AGA	>191.189.AGC	>191.200.AGG	>191.206.AGT	>191.227.ATA	>191.32.ATC	>191.196.ATG	>191.117.ATT	>191.90.CAA	>191.72.CAC	>191.350.CAG	>191.117.CAT	>191.150.CCA	>191.307.CCC	>191.190.CCG	>191.122.CCT	>191.270.CGA	>191.214.CGC	>191.51.CGG	>191.204.CGT	>191.227.CTA	>191.34.CTC		>191.121.CTT	>191.64.GAA	>191.21.GAC	>191.61.GAG	>191.27.GAT	>191.27.GCA		>191.31.GCG	>191.28.GCT	>191.71.GGA	>191.22.GGC	>191.96.GGG	>191.81.GGT	>191.54.GTA	>191.33.GTC	>191.43.GTG	>191.86.GTT	>191.68.TAA	>191.78.TAC
EPQIAAWFANKRFKIKKS	ESQISGWFRNKRFKIKKS	ERQINQWFWNKRYKIKKS	EKQISSWFSNKRFKIKKS	EVQIKNWFDNKRRKIKKS	ELQITTWFANKRKKIKKS	ERQITHWFENKRRKIKKS	ERQILYWFQNKRKKIKKS	ELQIMVWFSNKRPKIKKS	ETQIGRWFNNKRVKIKKS	ERQISAWFWNKRDKIKKS	ERQIHKWFENKRSKIKKS	ERQISQWFANKRVKIKKS	EMQIQLWFANKREKIKKS	EAQITSWFVNKRWKIKKS	ETQIRYWFQNKRQKIKKS	EGQIHNWFVNKRRKIKKS	EMQIAMWFRNKRRKIKKS	EFQIRMWFSNKRIKIKKS	ETQIASWFSNKRRKIKKS	EKQIMNWFQNKRKKIKKS	ETQISDWFHNKRRKIKKS	EVQIRDWFQNKRNKIKKS	ETQIVDWFGNKRKKIKKS	EKQISYWFGNKRKKIKKS	ELQIGYWFSNKRRKIKKS	EEQISHWFENKRRKIKKS	ERQIEDWFSNKRRKIKKS	EVQIGWWFANKRKKIKKS	ERQIMYWFGNKRKKIKKS		ETQITNWFSNKRAKIKKS	EKQIKRWFQNKRWKIKKS	EGQIERWFRNKRYKIKKS	EKQITQWFWNKRYKIKKS	EKQIDKWFINKRYKIKKS	ESQILRWFQNKRFKIKKS		EVQITDWFRNKRYKIKKS	EMQITNWFRNKRFKIKKS	EMQITKWFDNKRQKIKKS	EGQILKWFNNKRWKIKKS	EEQIRKWFENKRRKIKKS	ESQILKWFSNKRFKIKKS	ESQIHKWFANKRAKIKKS	ETQIISWFVNKRCKIKKS	EAQILTWFQNKRYKIKKS	ENQIAKWFGNKRNKIKKS	EVQIRVWFANKRAKIKKS	ESQIRVWFSNKRAKIKKS
>192.207.AAA	>192.116.AAC	>192.216.AAG	>192.151.AAT	>192.218.ACA	>192.152.ACC	>192.93.ACG	>192.109.ACT	>192.209.AGA	>192.188.AGC	>192.196.AGG	>192.204.AGT	>192.224.ATA	>192.31.ATC	>192.191.ATG	>192.116.ATT	>192.89.CAA	>192.72.CAC	>192.346.CAG	>192.116.CAT	>192.150.CCA	>192.307.CCC	>192.190.CCG	>192.122.CCT	>192.265.CGA	>192.214.CGC	>192.50.CGG	>192.204.CGT	>192.226.CTA	>192.33.CTC		>192.117.CTT	>192.64.GAA	>192.21.GAC	>192.60.GAG	>192.27.GAT	>192.27.GCA		>192.31.GCG	>192.28.GCT	>192.71.GGA	>192.21.GGC	>192.95.GGG	>192.80.GGT	>192.54.GTA	>192.33.GTC	>192.43.GTG	>192.86.GTT	>192.68.TAA	>192.77.TAC
ETQIRTWFANKRFKIKKS	EDQIGAWFRNKRHKIKKS	ERQIRQWFWNKRHKIKKS	EKQICTWFSNKRFKIKKS	ERQIMSWFHNKRSKIKKS	ERQIRCWFINKRRKIKKS	ERQISYWFDNKRRKIKKS	EVQIRNWFQNKRKKIKKS	TRPSYKWFWNKRHKIKKS	ETQIQRWFSNKRVKIKKS	EMQINCWFQNKRYKIKKS	EKQIMKWFENKRFKIKKS	EQQIVSWFANKRAKIKKS	ERQIEAWFANKRGKIKKS	ERQIIYWFQNKRTKIKKS	EVQIRIWFQNKRSKIKKS	EMQIANWFVNKRRKIKKS	EVQIGMWFRNKRRKIKKS	EWQIVGWFQNKRRKIKKS	ESQIGQWFSNKRRKIKKS	ELQIMNWFQNKRKKIKKS	ERQIGDWFSNKRKKIKKS	EVQIKDWFQNKRNKIKKS	ESQITNWFGNKRKKIKKS	EVQIRYWFGNKRAKIKKS	ESQIHNWFSNKRRKIKKS	ESQIRRWFENKRRKIKKS	ENQILCWFSNKRRKIKKS	EMQIHMWFANKRRKIKKS	EMQIRYWFSNKRKKIKKS		ERQILMWFGNKRRKIKKS	EEQIARWFQNKRFKIKKS	EVQITRWFRNKRFKIKKS	ESQIARWFWNKRYKIKKS	EQQINKWFVNKRWKIKKS	EGQIAKWFSNKRAKIKKS		ERQIIDWFRNKRFKIKKS	ETQICIWFKNKRFKIKKS	EAQIGKWFDNKRQKIKKS	ERQITKWFNNKRQKIKKS	EEQISKWFENKRRKIKKS	EGQIMKWFDNKRAKIKKS	ESQIRRWFQNKRWKIKKS	EGQIAKWFRNKRFKIKKS	EEQIRVWFQNKRFKIKKS	EKQILRWFGNKRFKIKKS	EGQILTWFANKRAKIKKS	EAQIIRWFINKRAKIKKS
>193.205.AAA	>193.116.AAC	>193.216.AAG	>193.150.AAT	>193.218.ACA	>193.151.ACC	>193.92.ACG	>193.109.ACT	>193.209.AGA	>193.188.AGC	>193.195.AGG	>193.204.AGT	>193.222.ATA	>193.31.ATC	>193.190.ATG	>193.115.ATT	>193.89.CAA	>193.72.CAC	>193.345.CAG	>193.116.CAT	>193.150.CCA	>193.306.CCC	>193.190.CCG	>193.121.CCT	>193.264.CGA	>193.213.CGC	>193.50.CGG	>193.204.CGT	>193.225.CTA	>193.33.CTC		>193.115.CTT	>193.64.GAA	>193.21.GAC	>193.60.GAG	>193.27.GAT	>193.27.GCA		>193.31.GCG	>193.28.GCT	>193.70.GGA	>193.21.GGC	>193.94.GGG	>193.80.GGT	>193.54.GTA	>193.33.GTC	>193.43.GTG	>193.86.GTT	>193.67.TAA	>193.77.TAC
ERQIHYWFVNKRYKIKKS	EKQIISWFRNKRFKIKKS	EMQIKQWFWNKRWKIKKS	EKQIMYWFNNKRHKIKKS	EPQISNWFNNKRRKIKKS	ERQIRDWFHNKRTKIKKS	ERQIAMWFENKRRKIKKS	EVQIKNWFENKRRKIKKS	EFQIRRWFENKRYKIKKS	EWQIKSWFKNKRFKIKKS	EKQIAKWFENKRQKIKKS	ERQIMKWFENKRSKIKKS	EKQIYYWFVNKRQKIKKS	EKQIRVWFQNKRDKIKKS	EVQIIYWFQNKRWKIKKS	ERQILVWFQNKRRKIKKS	ETQIANWFVNKRRKIKKS	ELQIGMWFRNKRRKIKKS	EAQISNWFWNKRRKIKKS	EQQILTWFSNKRRKIKKS	ERQITCWFQNKRKKIKKS	ELQILNWFSNKRKKIKKS	ERQIKYWFENKRKKIKKS	ERQITDWFSNKRKKIKKS	EAQIFYWFANKRAKIKKS	EKQIMTWFNNKRKKIKKS	EVQITRWFENKRRKIKKS	EQQISNWFSNKRRKIKKS	EIQIAYWFRNKRKKIKKS	EVQIMTWFSNKRKKIKKS		EVQITNWFSNKRKKIKKS	EQQINHWFKNKRWKIKKS	ETQITRWFRNKRWKIKKS	EQQIGRWFMNKRYKIKKS	EGQIADWFRNKRWKIKKS	ECQIYNWFRNKRQKIKKS		ERQILDWFRNKRYKIKKS	EKQIKDWFRNKRFKIKKS	EMQIVLWFINKRRKIKKS	ESQITKWFNNKRQKIKKS	EQQIGKWFENKRRKIKKS	EKQIKKWFDNKRMKIKKS	EGQIAKWFQNKRLKIKKS	ELQITRWFANKRYKIKKS	EEQIRRWFENKRFKIKKS	EFQIQNWFRNKRYKIKKS	EQQICVWFANKRAKIKKS	ETQIRVWFSNKRAKIKKS
>194.202.AAA	>194.115.AAC	>194.216.AAG	>194.150.AAT	>194.218.ACA	>194.149.ACC	>194.92.ACG	>194.108.ACT	>194.208.AGA	>194.187.AGC	>194.194.AGG	>194.203.AGT	>194.221.ATA	>194.30.ATC	>194.188.ATG	>194.115.ATT	>194.89.CAA	>194.72.CAC	>194.344.CAG	>194.115.CAT	>194.149.CCA	>194.305.CCC	>194.188.CCG	>194.121.CCT	>194.264.CGA	>194.213.CGC	>194.50.CGG	>194.201.CGT	>194.223.CTA	>194.33.CTC		>194.115.CTT	>194.64.GAA	>194.21.GAC	>194.60.GAG	>194.27.GAT	>194.27.GCA		>194.31.GCG	>194.28.GCT	>194.70.GGA	>194.21.GGC	>194.94.GGG	>194.80.GGT	>194.54.GTA	>194.33.GTC	>194.42.GTG	>194.86.GTT	>194.67.TAA	>194.77.TAC
ESQIVTWFANKRHKIKKS	EGQITAWFRNKRFKIKKS	ESQIKQWFWNKRFKIKKS	EKQIMFWFNNKRYKIKKS	ELQIRWWFDNKRRKIKKS	EKQISYWFHNKRTKIKKS	ERQIQQWFMNKRDKIKKS	EKQISAWFHNKRMKIKKS	EKQITYWFNNKRHKIKKS	EPQISSWFHNKRFKIKKS	EKQIRKWFENKRWKIKKS	EKQIRKWFENKRAKIKKS	EAQIKYWFVNKRNKIKKS	EVQIRMWFANKRWKIKKS	ETQIMYWFQNKRSKIKKS	ELQIKNWFQNKRCKIKKS	EVQIMNWFVNKRRKIKKS	ENQIGMWFRNKRRKIKKS	ETQIADWFWNKRVKIKKS	ENQIMMWFSNKRRKIKKS	EMQIANWFANKRKKIKKS	ESQILNWFSNKRKKIKKS	EVQITYWFENKRKKIKKS	ERQINDWFHNKRRKIKKS	ERQISMWFANKRRKIKKS	EKQILCWFSNKRRKIKKS	EAQISRWFENKRRKIKKS	EAQIVNWFSNKRRKIKKS	ESQIGYWFANKRRKIKKS	ESQIHWWFSNKRKKIKKS		ELQIMHWFSNKRKKIKKS	EMQICRWFQNKRAKIKKS	EAQIVRWFRNKRFKIKKS	EKQIMRWFWNKRYKIKKS	EDQISRWFLNKRYKIKKS	ESQIIKWFQNKRRKIKKS		EKQIMDWFRNKRRKIKKS	EAQIDNWFRNKRYKIKKS	ETQISKWFDNKRHKIKKS	ESQIMKWFNNKRWKIKKS	EKQIRKWFENKRGKIKKS	EKQIQKWFDNKRQKIKKS	ERQIIRWFQNKRSKIKKS	EYQISRWFGNKRQKIKKS	ESQISAWFQNKRYKIKKS	EEQIVRWFANKRYKIKKS	EKQIKLWFSNKRAKIKKS	EHQIMRWFINKRAKIKKS
>195.202.AAA	>195.115.AAC	>195.213.AAG	>195.146.AAT	>195.218.ACA	>195.148.ACC	>195.91.ACG	>195.107.ACT	>195.208.AGA	>195.186.AGC	>195.194.AGG	>195.202.AGT	>195.220.ATA	>195.30.ATC	>195.186.ATG	>195.114.ATT	>195.88.CAA	>195.72.CAC	>195.343.CAG	>195.115.CAT	>195.148.CCA	>195.302.CCC	>195.188.CCG	>195.120.CCT	>195.261.CGA	>195.212.CGC	>195.49.CGG	>195.201.CGT	>195.222.CTA	>195.32.CTC		>195.114.CTT	>195.63.GAA	>195.21.GAC	>195.59.GAG	>195.27.GAT	>195.26.GCA		>195.30.GCG	>195.28.GCT	>195.70.GGA	>195.21.GGC	>195.92.GGG	>195.80.GGT	>195.53.GTA	>195.32.GTC	>195.42.GTG	>195.85.GTT	>195.66.TAA	>195.77.TAC
ERQILSWFANKRHKIKKS	EAQISAWFRNKRFKIKKS	EHQIAQWFWNKRFKIKKS	ETQISTWFCNKRFKIKKS	ERQIRNWFNNKRRKIKKS	EVQIPVWFANKRSKIKKS	EFQILLWFFNKRFKIKKS	ESQIKSWFHNKRMKIKKS	ETQIFRWFANKRHKIKKS	E_QIRDWFFNKRGKIKKS	EAQIMKWFENKRQKIKKS	ERQISKWFENKRFKIKKS	EKQIRTWFQNKRVKIKKS	E_QIPAWFLNKRAKIKKS	ERQIKVWFQNKRMKIKKS	ERQIRVWFQNKRAKIKKS	ELQIVYWFQNKRRKIKKS	ELQIHNWFSNKRRKIKKS	EMQIAWWFWNKRRKIKKS	EKQIANWFSNKRRKIKKS	EQQILQWFANKRRKIKKS	EKQIRDWFSNKRKKIKKS	EKQIVQWFENKRKKIKKS	EQQIVYWFSNKRKKIKKS	ERQIHHWFSNKRRKIKKS	EKQISQWFSNKRVKIKKS	EDQISHWFENKRRKIKKS	EVQIMYWFSNKRRKIKKS	EVQIAYWFANKRRKIKKS	EIQIVYWFSNKRRKIKKS		EKQIMNWFANKRKKIKKS	EIQICRWFQNKRFKIKKS	EEQICRWFRNKRWKIKKS	ERQIMRWFWNKRFKIKKS	ERQIMVWFRNKRWKIKKS	EVQIGRWFQNKRRKIKKS		ERQIMDWFRNKRRKIKKS	EKQIIDWFRNKRRKIKKS	EQQINKWFDNKRAKIKKS	EQQIAKWFNNKRQKIKKS	EVQIIRWFGNKRRKIKKS	EGQICKWFNNKRVKIKKS	ESQIRRWFENKRAKIKKS	EWQIAKWFRNKRWKIKKS	EMQIARWFENKRYKIKKS	EVQINRWFANKRYKIKKS	ERQIVVWFCNKRAKIKKS	EEQIRVWFSNKRSKIKKS
>196.201.AAA	>196.115.AAC	>196.213.AAG	>196.144.AAT	>196.217.ACA	>196.148.ACC	>196.90.ACG	>196.107.ACT	>196.207.AGA	>196.185.AGC	>196.193.AGG	>196.202.AGT	>196.220.ATA	>196.30.ATC	>196.185.ATG	>196.114.ATT	>196.88.CAA	>196.72.CAC	>196.343.CAG	>196.114.CAT	>196.147.CCA	>196.302.CCC	>196.187.CCG	>196.116.CCT	>196.261.CGA	>196.210.CGC	>196.49.CGG	>196.197.CGT	>196.222.CTA	>196.32.CTC		>196.111.CTT	>196.62.GAA	>196.21.GAC	>196.59.GAG	>196.27.GAT	>196.26.GCA		>196.30.GCG	>196.28.GCT	>196.70.GGA	>196.21.GGC	>196.92.GGG	>196.80.GGT	>196.53.GTA	>196.32.GTC	>196.42.GTG	>196.85.GTT	>196.66.TAA	>196.76.TAC
EKQIVYWFVNKRAKIKKS	ESQIGTWFRNKRFKIKKS	ESQISSWFWNKRFKIKKS	ERQIIQWFSNKRFKIKKS	EGQIKNWFNNKRSKIKKS	EWQIRAWFKNKRYKIKKS	EKQIRMWFENKRRKIKKS	ERQIKFWFENKRRKIKKS	ELQIFRWFANKRQKIKKS	ERQIHLWFKNKRYKIKKS	EWQIYAWFKNKRFKIKKS	ERQIQKWFENKRWKIKKS	ERQIATWFNNKRVKIKKS	EKQIPNWFQNKRQKIKKS	EQQIRTWFQNKRDKIKKS	EKQIKTWFQNKRNKIKKS	ETQIHYWFSNKRRKIKKS	ELQIATWFRNKRRKIKKS	ELQISWWFWNKRRKIKKS	EIQIIQWFSNKRRKIKKS	ERQISDWFANKRKKIKKS	ETQIMQWFSNKRKKIKKS	EQQILNWFQNKRKKIKKS	EKQITDWFHNKRKKIKKS	ERQIFYWFSNKRRKIKKS	ERQIAMWFSNKRRKIKKS	EKQIRLWFENKRRKIKKS	EKQIGYWFNNKRRKIKKS	EKQIVMWFQNKRRKIKKS	EKQIQYWFGNKRKKIKKS		ETQIYWWFSNKRRKIKKS	EKQIDRWFQNKRYKIKKS	ELQIIRWFRNKRWKIKKS	EKQIMSWFWNKRYKIKKS	EYQIMHWFRNKRYKIKKS	EKQIMKWFQNKRMKIKKS		ERQIIDWFRNKRFKIKKS	EIQIQCWFKNKRFKIKKS	EDQISKWFDNKRYKIKKS	EMQIKRWFGNKRTKIKKS	ESQIGKWFENKRAKIKKS	ERQIVKWFDNKRVKIKKS	ELQIIKWFQNKRWKIKKS	EAQIGKWFRNKRFKIKKS	ERQICKWFENKRFKIKKS	ERQIERWFGNKRYKIKKS	EGQIRRWFSNKRLKIKKS	EEQIRVWFSNKRSKIKKS
>197.199.AAA	>197.115.AAC	>197.212.AAG	>197.144.AAT	>197.217.ACA	>197.146.ACC	>197.86.ACG	>197.104.ACT	>197.205.AGA	>197.185.AGC	>197.193.AGG	>197.201.AGT	>197.220.ATA	>197.30.ATC	>197.184.ATG	>197.114.ATT	>197.88.CAA	>197.71.CAC	>197.343.CAG	>197.114.CAT	>197.146.CCA	>197.301.CCC	>197.187.CCG	>197.114.CCT	>197.259.CGA	>197.209.CGC	>197.48.CGG	>197.197.CGT	>197.212.CTA	>197.32.CTC		>197.111.CTT	>197.62.GAA	>197.21.GAC	>197.57.GAG	>197.27.GAT	>197.26.GCA		>197.30.GCG	>197.28.GCT	>197.69.GGA	>197.21.GGC	>197.91.GGG	>197.80.GGT	>197.53.GTA	>197.32.GTC	>197.42.GTG	>197.85.GTT	>197.65.TAA	>197.76.TAC
EFQIACWFSNKRFKIKKS	EGQIGQWFRNKRFKIKKS	EQQIVQWFWNKRYKIKKS	EKQIGNWFSNKRFKIKKS	ERQICNWFNNKRRKIKKS	EDQIRVWFKNKRYKIKKS	ETQITHWFENKRRKIKKS	EVQIGKWFKNKRLKIKKS	EGQISVWFRNKRLKIKKS	ENQISRWFNNKRVKIKKS	EVQINKWFENKRFKIKKS	ERQISKWFENKRFKIKKS	ERQIQYWFNNKRSKIKKS	ELQIYYWFKNKRYKIKKS	EKQISNWFQNKRWKIKKS	ERQITVWFQNKRRKIKKS	ERQIADWFANKRRKIKKS	ELQISMWFRNKRRKIKKS	EVQISWWFWNKRRKIKKS	ESQIRDWFSNKRRKIKKS	ETQIINWFANKRKKIKKS	ELQISNWFSNKRKKIKKS	EEQIANWFGNKRKKIKKS	EVQIMNWFSNKRKKIKKS	EVQIMYWFQNKRTKIKKS	ERQICLWFNNKRRKIKKS	RAPVPGWFLNKRAKIKKS	ESQIVNWFSNKRRKIKKS	EKQIMMWFANKRRKIKKS	ENQIVNWFSNKRKKIKKS		EVQIYHWFANKRRKIKKS	EGQIRRWFQNKRWKIKKS	EKQITRWFRNKRWKIKKS	EVQINRWFWNKRYKIKKS	EGQIAVWFRNKRYKIKKS	EKQILKWFQNKREKIKKS		ELQIQDWFRNKRYKIKKS	ELQITNWFRNKRFKIKKS	EAQIFRWFANKRYKIKKS	ELQILKWFSNKRTKIKKS	ERQITKWFENKRRKIKKS	EPQILKWFSNKRAKIKKS	ENQIARWFQNKRGKIKKS	ESQISKWFRNKRFKIKKS	ESQILRWFENKRFKIKKS	EGQITRWFANKRYKIKKS	EQQIAIWFRNKRAKIKKS	ETQIRIWFSNKRFKIKKS
>198.199.AAA	>198.113.AAC	>198.211.AAG	>198.143.AAT	>198.215.ACA	>198.145.ACC	>198.86.ACG	>198.102.ACT	>198.203.AGA	>198.185.AGC	>198.192.AGG	>198.201.AGT	>198.219.ATA	>198.28.ATC	>198.184.ATG	>198.114.ATT	>198.88.CAA	>198.71.CAC	>198.343.CAG	>198.114.CAT	>198.145.CCA	>198.301.CCC	>198.185.CCG	>198.114.CCT	>198.259.CGA	>198.209.CGC	>198.47.CGG	>198.197.CGT	>198.211.CTA	>198.32.CTC		>198.110.CTT	>198.62.GAA	>198.21.GAC	>198.56.GAG	>198.27.GAT	>198.26.GCA		>198.30.GCG	>198.28.GCT	>198.68.GGA	>198.21.GGC	>198.90.GGG	>198.79.GGT	>198.53.GTA	>198.31.GTC	>198.41.GTG	>198.84.GTT	>198.64.TAA	>198.76.TAC
ETQIKTWFNNKRHKIKKS	EGQIAGWFRNKRHKIKKS	ERQIRQWFWNKRHKIKKS	ERQIAAWFSNKRFKIKKS	EMQITNWFTNKRRKIKKS	EKQIKHWFENKRKKIKKS	EAQITLWFSNKRTKIKKS	EHQIPRWFPNKRFKIKKS	EKQITYWFNNKRWKIKKS	ERQILRWFNNKRVKIKKS	EGQISDWFSNKRNKIKKS	EVQIVYWFSNKRFKIKKS	EKQILSWFANKRSKIKKS	EVQIRMWFGNKRFKIKKS	ERQIAYWFTNKRRKIKKS	ECQILSWFHNKRNKIKKS	EVQISHWFANKRRKIKKS	EKQISDWFKNKRRKIKKS	ELQISRWFWNKRRKIKKS	ENQIACWFSNKRRKIKKS	EKQITGWFQNKRKKIKKS	EKQISTWFSNKRKKIKKS	EVQIVYWFENKRKKIKKS	EKQISDWFGNKRKKIKKS	ELQIHNWFCNKRRKIKKS	EPQIRMWFSNKRRKIKKS	EEQIRRWFENKRRKIKKS	ELQIYYWFSNKRRKIKKS	EMQICYWFANKRKKIKKS	EVQIRYWFGNKRKKIKKS		EMQIRNWFGNKRRKIKKS	EQQIGRWFQNKRWKIKKS	ELQIVRWFRNKRWKIKKS	EVQIMVWFSNKRYKIKKS	ERQISLWFRNKRYKIKKS	EIQIMRWFQNKRMKIKKS		EKQIVDWFRNKRYKIKKS	ESQITNWFRNKRFKIKKS	EWQISKWFDNKRFKIKKS	EYQILKWFNNKRFKIKKS	EVQIYRWFNNKRWKIKKS	EAQITKWFNNKRQKIKKS	EVQIMKWFQNKRNKIKKS	EVQIQRWFGNKRFKIKKS	EGQIGRWFENKRDKIKKS	ESQITVWFRNKRYKIKKS	ERQISVWFVNKRAKIKKS	EEQIRVWFSNKRAKIKKS
>199.199.AAA	>199.113.AAC	>199.211.AAG	>199.143.AAT	>199.215.ACA	>199.144.ACC	>199.83.ACG	>199.102.ACT	>199.203.AGA	>199.185.AGC	>199.192.AGG	>199.201.AGT	>199.219.ATA	>199.27.ATC	>199.182.ATG	>199.113.ATT	>199.88.CAA	>199.71.CAC	>199.334.CAG	>199.114.CAT	>199.145.CCA	>199.299.CCC	>199.185.CCG	>199.114.CCT	>199.258.CGA	>199.208.CGC	>199.47.CGG	>199.196.CGT	>199.210.CTA	>199.32.CTC		>199.110.CTT	>199.62.GAA	>199.21.GAC	>199.56.GAG	>199.27.GAT	>199.25.GCA		>199.30.GCG	>199.28.GCT	>199.68.GGA	>199.21.GGC	>199.89.GGG	>199.79.GGT	>199.53.GTA	>199.31.GTC	>199.41.GTG	>199.84.GTT	>199.64.TAA	>199.75.TAC
EMQIKYWFVNKRWKIKKS	EAQIGSWFRNKRHKIKKS	ELQIAQWFWNKRHKIKKS	ESQISQWFANKRFKIKKS	EVQIKWWFENKRRKIKKS	EKQIGMWFQNKRKKIKKS	EQQIIYWFDNKRRKIKKS	EVQIKYWFENKRAKIKKS	EGQIFRWFANKRHKIKKS	EKQIARWFNNKRVKIKKS	EGQIHKWFENKRYKIKKS	ERQIGKWFENKRYKIKKS	ERQIRSWFANKRNKIKKS	EIQITQWFGNKRNKIKKS	EMQIVFWFQNKRQKIKKS	EYQIRIWFQNKRSKIKKS	ERQISNWFVNKRRKIKKS	ESQIGMWFRNKRRKIKKS	ESQITNWFSNKRAKIKKS	EQQILCWFSNKRRKIKKS	ERQILTWFQNKRKKIKKS	EAQIVNWFSNKRKKIKKS	ERQIINWFENKRRKIKKS	EGQIANWFGNKRKKIKKS	EVQIANWFGNKRRKIKKS	ETQIRNWFSNKRRKIKKS	ETQIRRWFENKRRKIKKS	EKQIAMWFSNKRRKIKKS	ERQIATWFANKRKKIKKS	EVQIRYWFQNKRKKIKKS		ETQIAHWFGNKRRKIKKS	EVQISRWFQNKRWKIKKS	EVQIRRWFRNKRWKIKKS	EGQIMRWFWNKRYKIKKS	ESQIARWFLNKRYKIKKS	ELQIFNWFRNKRAKIKKS		EPQITDWFRNKRYKIKKS	EVQIGVWFKNKRFKIKKS	ERQIVKWFDNKRMKIKKS	EEQIMKWFNNKRWKIKKS	EQQIAKWFENKRAKIKKS	EQQIRKWFDNKRTKIKKS	ELQIRRWFENKRAKIKKS	EQQIMKWFRNKRGKIKKS	EKQISIWFQNKRFKIKKS	EFQIRVWFANKRFKIKKS	ERQITVWFSNKRAKIKKS	EEQIRVWFSNKRVKIKKS
>200.198.AAA	>200.113.AAC	>200.210.AAG	>200.141.AAT	>200.215.ACA	>200.143.ACC	>200.82.ACG	>200.100.ACT	>200.200.AGA	>200.184.AGC	>200.191.AGG	>200.200.AGT	>200.218.ATA	>200.26.ATC	>200.181.ATG	>200.113.ATT	>200.87.CAA	>200.71.CAC	>200.333.CAG	>200.114.CAT	>200.144.CCA	>200.297.CCC	>200.183.CCG	>200.113.CCT	>200.254.CGA	>200.208.CGC	>200.46.CGG	>200.191.CGT	>200.209.CTA	>200.32.CTC		>200.110.CTT	>200.61.GAA		>200.56.GAG	>200.27.GAT	>200.25.GCA		>200.30.GCG	>200.28.GCT	>200.68.GGA		>200.88.GGG	>200.79.GGT	>200.53.GTA	>200.31.GTC	>200.41.GTG	>200.84.GTT	>200.63.TAA	>200.74.TAC
ERQIVGWFANKRHKIKKS	ESQIVSWFRNKRFKIKKS	ERQISQWFWNKRWKIKKS	EKQIASWFTNKRFKIKKS	ELQIANWFNNKRRKIKKS	EWQIQRWFKNKRYKIKKS	ERQIKMWFENKRRKIKKS	ESQIKMWFQNKRRKIKKS	ELQISRWFWNKRWKIKKS	EKQIHYWFRNKRTKIKKS	EKQISKWFENKRQKIKKS	ESQITKWFENKRFKIKKS	ERQISSWFANKRVKIKKS	EKQIVHWFANKRVKIKKS	ERQILPWFPNKRGKIKKS	EEQILTWFINKRAKIKKS	ESQIATWFANKRRKIKKS	EGQITMWFRNKRRKIKKS	ERQITDWFTNKRRKIKKS	EYQIINWFSNKRRKIKKS	EEQIGWWFLNKRKKIKKS	EKQIGCWFSNKRKKIKKS	ERQILDWFQNKRKKIKKS	ERQILDWFSNKRKKIKKS	ESQIFYWFANKRAKIKKS	ENQISYWFNNKRRKIKKS	ERQIAMWFENKRRKIKKS	EVQITNWFSNKRRKIKKS	EKQIMTWFQNKRKKIKKS	NEMQIMNWFRNKRKIKKS		EMQIYYWFGNKRKKIKKS	EMQITKWFQNKRWKIKKS		EQQITRWFWNKRWKIKKS	EKQINRWFLNKRYKIKKS	EAQITRWFQNKRRKIKKS		EKQILDWFRNKRFKIKKS	EMQIQTWFKNKRWKIKKS	ELQISKWFDNKRWKIKKS		ERQITKWFENKRGKIKKS	EKQILKWFNNKRMKIKKS	EMQIDKWFQNKRYKIKKS	EQQIMKWFRNKRAKIKKS	ELQIARWFENKRWKIKKS	EEQIGKWFLNKRYKIKKS	ETQIKVWFQNKRAKIKKS	ETQIRLWFSNKRYKIKKS
>201.197.AAA	>201.113.AAC	>201.209.AAG	>201.139.AAT	>201.213.ACA	>201.143.ACC	>201.82.ACG	>201.99.ACT	>201.199.AGA	>201.183.AGC	>201.187.AGG	>201.199.AGT	>201.216.ATA	>201.26.ATC	>201.180.ATG	>201.112.ATT	>201.87.CAA	>201.71.CAC	>201.333.CAG	>201.114.CAT	>201.141.CCA	>201.295.CCC	>201.183.CCG	>201.112.CCT	>201.253.CGA	>201.208.CGC	>201.45.CGG	>201.188.CGT	>201.208.CTA	>201.32.CTC		>201.108.CTT	>201.61.GAA		>201.55.GAG	>201.27.GAT	>201.24.GCA		>201.30.GCG	>201.27.GCT	>201.68.GGA		>201.88.GGG	>201.79.GGT	>201.53.GTA	>201.31.GTC	>201.41.GTG	>201.84.GTT	>201.63.TAA	>201.74.TAC
ESQISSWFANKRFKIKKS	EQQINQWFRNKRHKIKKS	ECQIMQWFWNKRHKIKKS	EKQITSWFSNKRHKIKKS	EKQIRGWFQNKRRKIKKS	ETQILTWFSNKRKKIKKS	EPQIRMWFENKRRKIKKS	ELQIRNWFANKREKIKKS	EEQIFRWFANKRHKIKKS	EKQILRWFNNKRVKIKKS	EKQIRKWFENKRSKIKKS	ERQIRKWFENKRYKIKKS	ERQISAWFANKRSKIKKS	EWQIRKWFLNKRRKIKKS	ELQITVWFCNKRRKIKKS	ETQIKVWFQNKRSKIKKS	EVQIHNWFVNKRRKIKKS	ELQIAYWFTNKRRKIKKS	EAQISYWFWNKRRKIKKS	EVQINQWFSNKRRKIKKS	EIQIQNWFANKRKKIKKS	EVQIYNWFHNKRKKIKKS	EVQITYWFENKRRKIKKS	ERQILNWFSNKRKKIKKS	EKQILYWFQNKRLKIKKS	ESQIHDWFSNKRRKIKKS	RVADRHVVPNKRGKIKKS	EKQIQMWFSNKRRKIKKS	EHQIFHWFANKRKKIKKS	ERQIRFWFSNKRKKIKKS		ESQIASWFSNKRRKIKKS	ESQIERWFSNKRYKIKKS		EVQIMRWFWNKRYKIKKS	ESQIDKWFTNKRYKIKKS	ETQILRWFQNKRAKIKKS		EVQIVDWFRNKRYKIKKS	ERQIADWFRNKRFKIKKS	ESQIFRWFANKRYKIKKS		EGQILKWFENKRRKIKKS	ERQIGKWFNNKRMKIKKS	EQQITRWFQNKRGKIKKS	EVQICKWFRNKRYKIKKS	EKQICRWFENKRFKIKKS	EKQIMVWFLNKRYKIKKS	ERQITLWFRNKRAKIKKS	ENQIRVWFSNKRAKIKKS
>202.197.AAA	>202.112.AAC	>202.209.AAG	>202.139.AAT	>202.210.ACA	>202.143.ACC	>202.81.ACG	>202.98.ACT	>202.198.AGA	>202.183.AGC	>202.186.AGG	>202.199.AGT	>202.215.ATA	>202.26.ATC	>202.178.ATG	>202.110.ATT	>202.87.CAA	>202.71.CAC	>202.323.CAG	>202.113.CAT	>202.141.CCA	>202.295.CCC	>202.181.CCG	>202.109.CCT	>202.253.CGA	>202.207.CGC	>202.45.CGG	>202.187.CGT	>202.207.CTA	>202.32.CTC		>202.108.CTT	>202.61.GAA		>202.52.GAG	>202.27.GAT	>202.24.GCA		>202.30.GCG	>202.27.GCT	>202.67.GGA		>202.88.GGG	>202.79.GGT	>202.52.GTA	>202.30.GTC	>202.41.GTG	>202.83.GTT	>202.62.TAA	>202.74.TAC
ERQISTWFANKRFKIKKS	EMQIMAWFRNKRFKIKKS	ERQITQWFWNKRYKIKKS	ETQIQTWFANKRFKIKKS	EKQITYWFWNKRRKIKKS	EKQILYWFHNKRAKIKKS	EAQIMTWFQNKRNKIKKS	ETQIGRWF_NKRNKIKKS	EAQIFRWFANKRWKIKKS	ETQIRMWFSNKRVKIKKS	EKQIAKWFENKRRKIKKS	EKQIKKWFENKRAKIKKS	EMQIRWWFNNKRSKIKKS	E_QIT_WFNNKRPKIKKS	EKQICHWFQNKRQKIKKS	ERQIVTWFQNKRAKIKKS	EKQINQWFQNKRRKIKKS	EVQIAYWFSNKRRKIKKS	ERQIHRWFRNKRAKIKKS	ETQISCWFSNKRRKIKKS	ELQISNWFSNKRKKIKKS	EDQISHWFENKRRKIKKS	ETQIMTWFQNKRKKIKKS	ELQISNWFSNKRKKIKKS	EKQISYWFGNKRAKIKKS	EIQIMMWFSNKRRKIKKS	EVQIIHWFENKRRKIKKS	ERQIVNWFSNKRRKIKKS	ESQIGFWFSNKRKKIKKS	EVQIACWFSNKRKKIKKS		ETQISHWFSNKRKKIKKS	EIQIIRWFQNKRWKIKKS		ERQIQRWFWNKRYKIKKS	ELQIAVWFRNKRYKIKKS	ESQIMKWFQNKRAKIKKS		ERQIEDWFRNKRYKIKKS	EAQILDWFRNKRYKIKKS	ERQIAKWFDNKRWKIKKS		ESQI_VWFRNKRSKIKKS	EMQIRRWFDNKRQKIKKS	EVQINRWFGNKRFKIKKS	EMQIAKWFRNKRTKIKKS	ELQIMTWFMNKRYKIKKS	EDQILKWFANKRFKIKKS	EYQIRVWFANKRSKIKKS	ENQIRVWFSNKRVKIKKS
>203.197.AAA	>203.112.AAC	>203.209.AAG	>203.136.AAT	>203.210.ACA	>203.142.ACC	>203.81.ACG	>203.95.ACT	>203.198.AGA	>203.181.AGC	>203.181.AGG	>203.198.AGT	>203.215.ATA	>203.25.ATC	>203.177.ATG	>203.109.ATT	>203.87.CAA	>203.70.CAC	>203.318.CAG	>203.113.CAT	>203.140.CCA	>203.294.CCC	>203.181.CCG	>203.107.CCT	>203.253.CGA	>203.206.CGC	>203.45.CGG	>203.186.CGT	>203.205.CTA	>203.31.CTC		>203.107.CTT	>203.61.GAA		>203.51.GAG	>203.27.GAT	>203.24.GCA		>203.30.GCG	>203.27.GCT	>203.66.GGA		>203.86.GGG	>203.79.GGT	>203.52.GTA	>203.30.GTC	>203.41.GTG	>203.82.GTT	>203.62.TAA	>203.73.TAC
EAQISRWFANKRHKIKKS	EGQIMQWFRNKRFKIKKS	EKQIMVWFWNKRFKIKKS	EKQIMTWFINKRHKIKKS	ETQIRNWFNNKRRKIKKS	ERQITNWFHNKREKIKKS	EKQIVHWFENKRRKIKKS	ERQIRFWFENKRKKIKKS	ERQIRQWFWNKRYKIKKS	EEQIRRWFSNKRVKIKKS	EEQIKAWFLNKRYKIKKS	ERQIHKWFENKRWKIKKS	ERQIGTWFQNKRVKIKKS	ETQIRMWFANKRFKIKKS	EQQINVWFWNKRVKIKKS	EKQILCWFANKRTKIKKS	ELQISTWFANKRRKIKKS	EPQIGMWFRNKRRKIKKS	ELQISWWFWNKRRKIKKS	ELQITMWFSNKRRKIKKS	EQQIMNWFANKRKKIKKS	ESQIRDWFSNKRKKIKKS	ERQIAYWFENKRRKIKKS	EMQIMNWFSNKRKKIKKS	ESQIAHWFANKRRKIKKS	ETQIANWFSNKRRKIKKS	ERQIARWFENKRRKIKKS	EMQIVYWFGNKRAKIKKS	EKQIVYWFANKRAKIKKS	EIQIRYWFSNKRKKIKKS		ERQIANWFGNKRKKIKKS	EVQIQRWFQNKRWKIKKS		ERQIMTWFWNKRYKIKKS	EGQIMNWFRNKRWQIKKS	ETQIIGWFRNKRYKIKKS		EGQISDWFRNKRFKIKKS	EGQIMNWFRNKRFKIKKS	EGQISKWFDNKRFKIKKS		ERQISKWFENKRGKIKKS	EYQITKWFNNKRWKIKKS	ERQIGRWFQNKRMKIKKS	EYQIAKWFRNKRFKIKKS	ESQIARWFENKRYKIKKS	EVQIDKWFANKRFKIKKS	EKQIQVWFWNKRAKIKKS	EEQIRVWFSNKRVKIKKS
>204.195.AAA	>204.112.AAC	>204.209.AAG	>204.136.AAT	>204.209.ACA	>204.142.ACC	>204.81.ACG	>204.94.ACT	>204.198.AGA	>204.180.AGC	>204.181.AGG	>204.198.AGT	>204.215.ATA	>204.25.ATC	>204.176.ATG	>204.109.ATT	>204.87.CAA	>204.70.CAC	>204.314.CAG	>204.112.CAT	>204.140.CCA	>204.294.CCC	>204.179.CCG	>204.106.CCT	>204.251.CGA	>204.206.CGC	>204.43.CGG	>204.186.CGT	>204.202.CTA	>204.31.CTC		>204.105.CTT	>204.60.GAA		>204.51.GAG	>204.27.GAT	>204.24.GCA		>204.29.GCG	>204.27.GCT	>204.66.GGA		>204.86.GGG	>204.79.GGT	>204.52.GTA	>204.30.GTC	>204.40.GTG	>204.82.GTT	>204.62.TAA	>204.73.TAC
ERQIYFWFVNKRAKIKKS	EPQISSWFRNKRHKIKKS	ERQIRQWFWNKRHKIKKS	ERQISTWFSNKRFKIKKS	ETQIYNWFNNKRRKIKKS	ERQIMTWFSNKRKKIKKS	EQQITTWFQNKRNKIKKS	EKQISNWFHNKRMKIKKS	ERQIAQWFWNKRWKIKKS	ERQIIRWFNNKRVKIKKS	ESQIRKWFDNKRQKIKKS	EKQISKWFENKRMKIKKS	ERQISSWFANKRAKIKKS	ECQIAQWFRNKRRKIKKS	EAQILYWFQNKRTKIKKS	ETQIRIWFQNKRSKIKKS	EVQIHNWFANKRRKIKKS	ERQILQWFSNKRRKIKKS	ECQIKYWFWNKRRKIKKS	EVQIATWFANKRRKIKKS	EKQIATWFCNKRKKIKKS	ESQIINWFSNKRKKIKKS	ESQITNWFQNKRKKIKKS	EQQIMDWFHNKRRKIKKS	EPQISYWFANKRAKIKKS	EKQIMYWFNNKRKKIKKS	EKQICMWFENKRRKIKKS	ETQIGNWFSNKRRKIKKS	ETQIQFWFSNKRRKIKKS	EVQIMNWFSNKRKKIKKS		EKQIAMWFANKRRKIKKS	EEQIQRWFQNKRWKIKKS		ELQIMRWFWNKRWKIKKS	EGQICVWFRNKRYKIKKS	EAQIMRWFQNKRWKIKKS		EKQIQDWFRNKRFKIKKS	EAQITVWFKNKRYKIKKS	EGQINKWFDNKRQKIKKS		EKQIGKWFENKRRKIKKS	EFQIRKWFDNKRMKIKKS	EQQIFNWFRNKRLKIKKS	ERQIDKWFRNKRWKIKKS	ESQITRWFENKRFKIKKS	EGQIYNWFRNKRWKIKKS	EKQIRVWFVNKRAKIKKS	EKQIRLWFSNKRVKIKKS
>205.194.AAA	>205.112.AAC	>205.209.AAG	>205.136.AAT	>205.208.ACA	>205.140.ACC	>205.81.ACG	>205.93.ACT	>205.196.AGA	>205.179.AGC	>205.180.AGG	>205.198.AGT	>205.214.ATA	>205.25.ATC	>205.173.ATG	>205.108.ATT	>205.86.CAA	>205.70.CAC	>205.313.CAG	>205.112.CAT	>205.139.CCA	>205.293.CCC	>205.178.CCG	>205.106.CCT	>205.251.CGA	>205.204.CGC	>205.43.CGG	>205.182.CGT	>205.202.CTA	>205.31.CTC		>205.103.CTT	>205.60.GAA		>205.51.GAG	>205.26.GAT	>205.24.GCA		>205.29.GCG	>205.27.GCT	>205.66.GGA		>205.84.GGG	>205.78.GGT	>205.52.GTA	>205.30.GTC	>205.40.GTG	>205.82.GTT	>205.60.TAA	>205.73.TAC
ERQIMTWFANKRHKIKKS	ELQILQWFRNKRFKIKKS	EKQITQWFWNKRWKIKKS	ERQISSWFSNKRFKIKKS	ELQIMNWFNNKRRKIKKS	EKQIVSWFHNKRMKIKKS	ERQILTWFQNKRNKIKKS	ERQIRYWFDNKRRKIKKS	EAQIFRWFANKRSKIKKS	ERQILRWFNNKRVKIKKS	ECQIALWFPNKRCKIKKS	EKQIRVWFQNKRFKIKKS	ELQIKYWFANKRTKIKKS	EYQIRRWFGNKRTKIKKS	ELQITYWFQNKRWKIKKS	ERQIVIWFQNKRSKIKKS	ELQIFYWFANKRRKIKKS	ERQIAMWFRNKRRKIKKS	ELQISWWFWNKRRKIKKS	EKQIVMWFSNKRRKIKKS	ERQISDWFANKRKKIKKS	EKQITRWFENKRRKIKKS	EPQIRDWFQNKRKKIKKS	EPQILNWFSNKRKKIKKS	ERQIAHWFGNKRQKIKKS	EMQICYWFSNKRRKIKKS	EKQICRWFENKRRKIKKS	EKQINHWFSNKRRKIKKS	ESQIAYWFSNKRRKIKKS	ELQIRYWFSNKRKKIKKS		ETQIWNWFYNKRKKIKKS	EKQIGRWFQNKRWKIKKS		ERQISQWFWNKRWKIKKS	EVQIVMWFRNKRYKIKKS	ERQIGKWFQNKRMKIKKS		EFQISDWFRNKRYKIKKS	ERQIIDWFRNKRFKIKKS	EKQIAKWFDNKRSKIKKS		EKQILKWFENKRGKIKKS	EKQITKWFSNKREKIKKS	ERQITNWFRNKRLKIKKS	EEQISKWFRNKRFKIKKS	ELQIMRWFENKRYKIKKS	ESQISKWFCNKRFKIKKS	ERQINTWFANKRAKIKKS	EHQIRVWFSNKRAKIKKS
>206.193.AAA	>206.112.AAC	>206.208.AAG	>206.136.AAT	>206.208.ACA	>206.139.ACC	>206.81.ACG	>206.93.ACT	>206.195.AGA	>206.177.AGC	>206.178.AGG	>206.197.AGT	>206.213.ATA	>206.25.ATC	>206.170.ATG	>206.108.ATT	>206.86.CAA	>206.70.CAC	>206.312.CAG	>206.112.CAT	>206.139.CCA	>206.293.CCC	>206.178.CCG	>206.105.CCT	>206.248.CGA	>206.203.CGC	>206.42.CGG	>206.181.CGT	>206.201.CTA	>206.31.CTC		>206.103.CTT	>206.59.GAA		>206.51.GAG	>206.26.GAT	>206.24.GCA		>206.29.GCG	>206.27.GCT	>206.65.GGA		>206.83.GGG	>206.78.GGT	>206.52.GTA	>206.30.GTC	>206.40.GTG	>206.82.GTT	>206.60.TAA	>206.72.TAC
ERQIHYWFVNKRSKIKKS	ENQIGVWFRNKRCKIKKS	ERQISQWFWNKRWKIKKS	ERQIVMWFTNKRFKIKKS	EKQIKQWFQNKRRKIKKS	EKQITTWFHNKRTKIKKS	EWQIYSWFKNKRYKIKKS	ERQIKFWFENKRKKIKKS	ESQIFRWFANKRWKIKKS	EVQIMRWFNNKRVKIKKS	EGQILCWFSNKRFKIKKS	EQQIRAWFRNKRMKIKKS	EQQIRWWFNNKRWKIKKS	ECQIASWFHNKRRKIKKS	EKQISVWFMNKRSKIKKS	ERQIVVWFQNKRAKIKKS	EVQISTWFSNKRRKIKKS	ETQIGQWFRNKRRKIKKS	ERQITDWFTNKRRKIKKS	ESQIRNWFSNKRRKIKKS	ESQITMWFQNKRKKIKKS	ELQIMCWFSNKRKKIKKS	ERQITDWFQNKRKKIKKS	ERQIANWFSNKRKKIKKS	ERQIMWWFQNKRAKIKKS	EKQITYWFNNKRKKIKKS	EPQIAYWFENKRRKIKKS	EVQIKDWFSNKRRKIKKS	ERQIAYWFANKRKKIKKS	ETQIRFWFSNKRRKIKKS		EAQITYWFGNKRKKIKKS	EGQIGRWFQNKRWKIKKS		ERQISVWFWNKRWKIKKS	EVQIGRWFLNKRYKIKKS	EKQIIKWFQNKRRKIKKS		EQQIMDWFRNKRFKIKKS	EYQITNWFRNKRFKIKKS	EKQIAKWFDNKRAKIKKS		EAQIGKWFENKRRKIKKS	EGQIRKWFDNKRMKIKKS	EHQICRWFQNKRVKIKKS	EQQILKWFRNKRCKIKKS	ESQIGRWFENKRYKIKKS	ELQISVWFRNKRYKIKKS	ERQISVWFYNKRAKIKKS	ERQIRLWFSNKRAKIKKS
>207.192.AAA	>207.112.AAC	>207.206.AAG	>207.136.AAT	>207.208.ACA	>207.138.ACC	>207.81.ACG	>207.92.ACT	>207.194.AGA	>207.176.AGC	>207.177.AGG	>207.197.AGT	>207.213.ATA	>207.25.ATC	>207.170.ATG	>207.108.ATT	>207.86.CAA	>207.70.CAC	>207.308.CAG	>207.112.CAT	>207.139.CCA	>207.293.CCC	>207.178.CCG	>207.105.CCT	>207.247.CGA	>207.202.CGC	>207.42.CGG	>207.181.CGT	>207.201.CTA	>207.31.CTC		>207.102.CTT	>207.58.GAA		>207.51.GAG	>207.26.GAT	>207.24.GCA		>207.29.GCG	>207.27.GCT	>207.64.GGA		>207.82.GGG	>207.78.GGT	>207.52.GTA	>207.29.GTC	>207.40.GTG	>207.82.GTT	>207.60.TAA	>207.72.TAC
EKQIGYWFVNKRAKIKKS	ERQIEQWFRNKRFKIKKS	ERQIKQWFWNKRWKIKKS	ESQIRTWFTNKRFKIKKS	ESQINNWFNNKRRKIKKS	ERQIRDWFHNKRNKIKKS	EVQIRHWFENKRRKIKKS	ETQIKRWFPNKRRKIKKS	ERQIFRWFANKRQKIKKS	ERQIKMWFSNKRVKIKKS	EMQILKWFENKRYKIKKS	EKQIRKWFENKRMKIKKS	EGQIMRWFANKRVKIKKS	EIQITQWFGNKRDKIKKS	ESQIAVWFTNKRYKIKKS	ERQIAVWFQNKRSKIKKS	ELQIMYWFQNKRSKIKKS	EVQISYWFSNKRRKIKKS	EKQIMYWFWNKRRKIKKS	EKQIAGWFSNKRRKIKKS	ESQIVNWFANKRKKIKKS	EQQISTWFSNKRKKIKKS	ETQITDWFNNKRKKIKKS	EAQIMNWFSNKRKKIKKS	ERQIAHWFGNKRAKIKKS	EVQIMYWFSNKRRKIKKS	EKQIYLWFNNKRIKIKKS	ERQIMYWFSNKRVKIKKS	ELQIVYWFANKRKKIKKS	ERQIIDWFKNKRKKIKKS		ESQITYWFGNKRKKIKKS	EGQISRWFQNKRWKIKKS		ELQISQWFWNKRYKIKKS	ELQIMVWFRNKRYKIKKS	EHQIMRWFQNKRQKIKKS		ERQIAHWFCNKRYKIKKS	ELQIMDWFRNKRFKIKKS	EKQILLWFSNKRVKIKKS		ELQIAPWFNNKRGKIKKS	ELQIDKWFNNKRYKIKKS	EFQIQKWFQNKRMKIKKS	EKQIAKWFRNKRFKIKKS	EKQIVKWFENKRYKIKKS	EYQITNWFRNKRFKIKKS	EVQIRVWFCNKRAKIKKS	ESQIRVWFSNKRAKIKKS
>208.192.AAA	>208.112.AAC	>208.206.AAG	>208.135.AAT	>208.207.ACA	>208.138.ACC	>208.80.ACG	>208.92.ACT	>208.190.AGA	>208.176.AGC	>208.175.AGG	>208.197.AGT	>208.212.ATA	>208.25.ATC	>208.170.ATG	>208.107.ATT	>208.85.CAA	>208.70.CAC	>208.307.CAG	>208.111.CAT	>208.138.CCA	>208.291.CCC	>208.176.CCG	>208.104.CCT	>208.246.CGA	>208.201.CGC	>208.41.CGG	>208.181.CGT	>208.200.CTA	>208.31.CTC		>208.102.CTT	>208.58.GAA		>208.51.GAG	>208.26.GAT	>208.24.GCA		>208.29.GCG	>208.27.GCT	>208.64.GGA		>208.82.GGG	>208.78.GGT	>208.52.GTA	>208.29.GTC	>208.40.GTG	>208.82.GTT	>208.60.TAA	>208.72.TAC
EQQISTWFQNKRIKIKKS	EVQIGAWFRNKRFKIKKS	EQQISQWFWNKRFKIKKS	ESQIVGWFCNKRFKIKKS	ERQIAGWFQNKRRKIKKS	EKQIACWFHNKRSKIKKS	ELQIYYWFKNKRYKIKKS	ERQIYHWFCNKRKKIKKS	EHQIDRWFWNKRYKIKKS	ERQIRTWFSNKRVKIKKS	EKQILKWFENKRRKIKKS	EMQIRKWFENKRWKIKKS	ERQITYWFVNKRNKIKKS	EFQIATWFKNKRYKIKKS	ERQIVVWFQNKRDKIKKS	EVQITRWFRNKRFKIKKS	EVQIACWFANKRRKIKKS	EIQIQMWFSNKRRKIKKS	ERQISQWFWNKRRKIKKS	ELQIANWFGNKRRKIKKS	EMQIIYWFQNKRKKIKKS	ERQILDWFSNKRKKIKKS	EMQILNWFANKRKKIKKS	EQQIMYWFSNKRKKIKKS	ERQIHDWFSNKRRKIKKS	EKQICYWFNNKRRKIKKS	EAQICGWFSNKRLKIKKS	ERQISYWFSNKRMKIKKS	ELQIHYWFCNKRKKIKKS	ETQILYWFSNKRKKIKKS		ESQIVHWFSNKRRKIKKS	EYQIERWFQNKRYKIKKS		EGQISRWFWNKRYKIKKS	EGQIMDWFRNKRYKIKKS	EVQIMKWFQNKRMKIKKS		EGQISDWFRNKRYKIKKS	EKQIINWFRNKRFKIKKS	ESQIHCWFKNKRWKIKKS		ESQIREWFPNKRYKIKKS	ERQIAKWFNNKRVKIKKS	EGQIQRWFGNKRYKIKKS	EKQIVKWFRNKRWKIKKS	EKQIVKWFENKRAKIKKS	EAQIRVWFANKRYKIKKS	EKQIIIWFNNKRAKIKKS	ENQIRLWFSNKRYKIKKS
>209.191.AAA	>209.111.AAC	>209.206.AAG	>209.135.AAT	>209.207.ACA	>209.137.ACC	>209.78.ACG	>209.92.ACT	>209.189.AGA	>209.176.AGC	>209.174.AGG	>209.196.AGT	>209.212.ATA	>209.24.ATC	>209.170.ATG	>209.107.ATT	>209.85.CAA	>209.70.CAC	>209.306.CAG	>209.111.CAT	>209.138.CCA	>209.289.CCC	>209.176.CCG	>209.104.CCT	>209.246.CGA	>209.201.CGC	>209.41.CGG	>209.179.CGT	>209.195.CTA	>209.31.CTC		>209.102.CTT	>209.58.GAA		>209.51.GAG	>209.26.GAT	>209.23.GCA		>209.29.GCG	>209.27.GCT	>209.64.GGA		>209.82.GGG	>209.77.GGT	>209.51.GTA	>209.29.GTC	>209.40.GTG	>209.82.GTT	>209.60.TAA	>209.72.TAC
EKQIMYWFANKRHKIKKS	EMQIAQWFRNKRHKIKKS	EGQIRQWFWNKRYKIKKS	EKQIMTWFANKRFKIKKS	EVQINNWFNNKRRKIKKS	EQQIKDWFGNKRKKIKKS	EFQIYYWFKNKRYKIKKS	EVQIVAWFKNKRYKIKKS	ERQISQWFWNKRHKIKKS	EFQIPLWFWNKRYKIKKS	EKQIAKWFENKRSKIKKS	ESQIMKWFENKRWKIKKS	EKQIRMWFSNKRAKIKKS	EMQIQMWFPNKRPKIKKS	ELQIQYWFQNKRTKIKKS	ERQITVWFQNKRAKIKKS	EMQIAWWFSNKRRKIKKS	EVQISMWFRNKRRKIKKS	ECQINYWFWNKRRKIKKS	ERQIADWFSNKRRKIKKS	EVQITTWFQNKRKKIKKS	EQQIADWFSNKRKKIKKS	EIQIVYWFENKRRKIKKS	EQQIRDWFANKRKKIKKS	EKQIAYWFANKRSKIKKS	ERQIYYWFNNKRRKIKKS	ESQIGRWFENKRRKIKKS	EKQIADWFSNKRRKIKKS	ETQIFYWFANKRAKIKKS	EIQIRFWFSNKRKKIKKS		ERQIMYWFGNKRSKIKKS	ETQILRWFQNKRWKIKKS		EAQIMRWFWNKRFKIKKS	ERQINVWFRNKRWKIKKS	EVQIMRWFQNKRAKIKKS		ERQITDWFRNKRYKIKKS	ELQIQTWFKNKRWKIKKS	ERQIGKWFDNKRAKIKKS		ERQISKWFENKRSKIKKS	EAQISKWFNNKRQKIKKS	EEQIARWFQNKRWKIKKS	EKQIGKWFRNKRQKIKKS	EAQIRKWFENKRWKIKKS	ERQIKAWFANKRYKIKKS	ETQILRWFVNKRAKIKKS	EEQIRVWFSNKRSKIKKS
>210.189.AAA	>210.111.AAC	>210.204.AAG	>210.134.AAT	>210.206.ACA	>210.136.ACC	>210.76.ACG	>210.91.ACT	>210.188.AGA	>210.175.AGC	>210.174.AGG	>210.194.AGT	>210.212.ATA	>210.24.ATC	>210.169.ATG	>210.107.ATT	>210.85.CAA	>210.70.CAC	>210.305.CAG	>210.111.CAT	>210.138.CCA	>210.289.CCC	>210.175.CCG	>210.103.CCT	>210.245.CGA	>210.200.CGC	>210.40.CGG	>210.175.CGT	>210.194.CTA	>210.31.CTC		>210.101.CTT	>210.58.GAA		>210.50.GAG	>210.26.GAT	>210.23.GCA		>210.29.GCG	>210.27.GCT	>210.64.GGA		>210.80.GGG	>210.77.GGT	>210.51.GTA	>210.29.GTC	>210.40.GTG	>210.82.GTT	>210.59.TAA	>210.72.TAC
ETQIASWFWNKRLKIKKS	EIQIIGWFRNKRFKIKKS	EIQIMYWFTNKRHKIKKS	EKQIMDWFSNKRFKIKKS	EMQIMNWFNNKRRKIKKS	RARSSCGFLNKRRKIKKS	EKQIVYWFENKRRKIKKS	EYQILLWFFNKRHKIKKS	EKQIQRWFWNKRWKIKKS	EQQITRWFNNKRVKIKKS	EPQIHKWFENKRYKIKKS	EVQITCWFLNKRRKIKKS	ERQIMTWFANKRVKIKKS	ETQIKVWFGNKRRKIKKS	ERQILRWFCNKR_KIKKS	ESQISVWFQNKRSKIKKS	ETQIHYWFVNKRRKIKKS	ELQISDWFRNKRRKIKKS	EVQISYWFWNKRRKIKKS	ERQILNWFSNKRRKIKKS	EMQINNWFQNKRKKIKKS	EVQIRDWFHNKRKKIKKS	EQQITDWFHNKRRKIKKS	EVQITNWFSNKRKKIKKS	EYQIFCWFANKRKKIKKS	EKQILYWFNNKRRKIKKS	EVQIAHWFENKRRKIKKS	EVQIQNWFSNKRRKIKKS	ERQIFQWFANKRRKIKKS	EKQIRYWFENKRKKIKKS		ELQIIYWFGNKRSKIKKS	EVQIARWFQNKRWKIKKS		ELQISRWFWNKRYKIKKS	ETQIMVWFRNKRYKIKKS	EAQILRWFQNKRQKIKKS		ENQISDWFRNKRRKIKKS	ERQILDWFRNKRFKIKKS	EGQICKWFDNKRYKIKKS		ESQILKWFENKRRKIKKS	EKQIRKWFDNKRWKIKKS	EFQITRWFQNKRSKIKKS	EKQIERWFRNKRFKIKKS	EVQIARWFENKRHKIKKS	ESQITRWFGNKRYKIKKS	EVQIQVWFCNKRAKIKKS	EQQIIRWFINKRAKIKKS
>211.188.AAA	>211.111.AAC	>211.203.AAG	>211.134.AAT	>211.206.ACA	>211.131.ACC	>211.75.ACG	>211.91.ACT	>211.186.AGA	>211.174.AGC	>211.173.AGG	>211.193.AGT	>211.212.ATA	>211.24.ATC	>211.169.ATG	>211.107.ATT	>211.85.CAA	>211.69.CAC	>211.303.CAG	>211.111.CAT	>211.136.CCA	>211.288.CCC	>211.174.CCG	>211.103.CCT	>211.244.CGA	>211.200.CGC	>211.40.CGG	>211.174.CGT	>211.193.CTA	>211.31.CTC		>211.101.CTT	>211.58.GAA		>211.50.GAG	>211.26.GAT	>211.23.GCA		>211.28.GCG	>211.27.GCT	>211.64.GGA		>211.79.GGG	>211.76.GGT	>211.51.GTA	>211.29.GTC	>211.39.GTG	>211.81.GTT	>211.59.TAA	>211.71.TAC
EKQIMYWFVNKRSKIKKS	ESQISSWFRNKRFKIKKS	EQQILQWFWNKRFKIKKS	ERQIKNWFSNKRFKIKKS	EEQIKNWFQNKRRKIKKS	ETQIANWFHNKRTKIKKS	ENQIRYWFDNKRRKIKKS	ERQIACWFHNKRVKIKKS	ERQIKVWFWNKRYKIKKS	ELQISRWFSNKRVKIKKS	EAQISKWFENKRYKIKKS	EHQIRKWFENKRFKIKKS	EDQIRWWFNNKRAKIKKS	EVQIRMWFANKRWKIKKS	ELQINWWFINKRSKIKKS	ERQIRVWFQNKRAKIKKS	ETQITYWFQNKRRKIKKS	EVQIMDWFRNKRRKIKKS	ELQISWWFWNKRRKIKKS	EKQIMQWFSNKRRKIKKS	ERQIITWFQNKRKKIKKS	ELQIMNWFHNKRKKIKKS	ERQILDWFQNKRKKIKKS	ERQINDWFANKRKKIKKS	EAQIFNWFANKRRKIKKS	ERQIVMWFSNKRRKIKKS	EVQIGRWFENKRRKIKKS	EKQITDWFSNKRRKIKKS	ERQILLWFQNKRKKIKKS	ETQIANWFRNKRKKIKKS		ELQIVYWFGNKRAKIKKS	EKQIDRWFQNKRFKIKKS		ERQISQWFWNKRWKIKKS	EGQISRWFLNKRYKIKKS	ESQIARWFQNKRRKIKKS		ERQIIDWFRNKRFKIKKS	ERQILDWFRNKRFKIKKS	ERQIVKWFDNKRQKIKKS		EVQISKWFENKRRKIKKS	EVQIAKWFNNKRMKIKKS	ERQIERWFGNKRYKIKKS	EMQIHRWFPNKRMKIKKS	EKQILQWFQNKRYKIKKS	EEQINNWFRNKRWKIKKS	ERQIVLWFRNKRAKIKKS	ERQIRLWFSNKRAKIKKS
>212.188.AAA	>212.111.AAC	>212.197.AAG	>212.132.AAT	>212.202.ACA	>212.130.ACC	>212.74.ACG	>212.89.ACT	>212.186.AGA	>212.170.AGC	>212.172.AGG	>212.192.AGT	>212.212.ATA	>212.24.ATC	>212.169.ATG	>212.106.ATT	>212.84.CAA	>212.69.CAC	>212.298.CAG	>212.111.CAT	>212.136.CCA	>212.288.CCC	>212.173.CCG	>212.101.CCT	>212.244.CGA	>212.200.CGC	>212.39.CGG	>212.173.CGT	>212.193.CTA	>212.30.CTC		>212.101.CTT	>212.58.GAA		>212.49.GAG	>212.26.GAT	>212.23.GCA		>212.28.GCG	>212.27.GCT	>212.63.GGA		>212.78.GGG	>212.76.GGT	>212.51.GTA	>212.29.GTC	>212.39.GTG	>212.81.GTT	>212.59.TAA	>212.71.TAC
ERQIHYWFVNKRHKIKKS	ERQIAMWFRNKRFKIKKS	ERQIAQWFWNKRNKIKKS	EKQIMMWFSNKRFKIKKS	EKQITNWFNNKRRKIKKS	EKQITNWFHNKRNKIKKS	ERQIGYWFENKRRKIKKS	ETQIRNWFQNKRKKIKKS	EAQIRSWFNNKRWKIKKS	ERQILRWFNNKRVKIKKS	ETQIDKWFENKRYKIKKS	EIQINKWFMNKRWKIKKS	ERQIYSWFANKRAKIKKS	EVQIRMWFANKRFKIKKS	RRRSSPWFKNKRAKIKKS	ESQIQSWFPNKRSKIKKS	ERQIHHWFVNKRRKIKKS	EQQIGNWFSNKRRKIKKS	EAQIKYWFWNKRRKIKKS	ESQISNWFGNKRRKIKKS	EVQISMWFQNKRKKIKKS	EVQIANWFSNKRKKIKKS	ESQISNWFGNKRKKIKKS	ECQIANWFANKRKKIKKS	EVQIFYWFGNKRRKIKKS	ERQIYYWFSNKRRKIKKS	EKQITHWFENKRRKIKKS	EEQITYWFSNKRRKIKKS	EKQIAFWFANKRKKIKKS	ETQIRFWFSNKRKKIKKS		EMQIRNWFSNKRAKIKKS	EVQILRWFQNKRWKIKKS		ERQIQTWFWNKRYKIKKS	EVQIMIWFRNKRWKIKKS	EAQIRRWFQNKRFKIKKS		EAQIGDWFRNKRYKIKKS	EAQIACWFKNKRFKIKKS	ERQILKWFDNKREKIKKS		ERQI_EWF_NKRSKIKKS	EGQILKWFNNKRQKIKKS	ETQIRRWFQNKRWKIKKS	EQQIGKWFRNKRFKIKKS	EWQIGKWFENKRVKIKKS	EAQITAWFSNKRYKIKKS	ERQIMVWFWNKRAKIKKS	EMQIRVWFSNKRAKIKKS
>213.187.AAA	>213.111.AAC	>213.196.AAG	>213.132.AAT	>213.202.ACA	>213.129.ACC	>213.73.ACG	>213.88.ACT	>213.185.AGA	>213.169.AGC	>213.171.AGG	>213.190.AGT	>213.211.ATA	>213.24.ATC	>213.168.ATG	>213.106.ATT	>213.84.CAA	>213.69.CAC	>213.296.CAG	>213.110.CAT	>213.133.CCA	>213.288.CCC	>213.173.CCG	>213.100.CCT	>213.241.CGA	>213.199.CGC	>213.39.CGG	>213.172.CGT	>213.193.CTA	>213.30.CTC		>213.100.CTT	>213.58.GAA		>213.49.GAG	>213.26.GAT	>213.23.GCA		>213.28.GCG	>213.27.GCT	>213.63.GGA		>213.77.GGG	>213.76.GGT	>213.51.GTA	>213.29.GTC	>213.39.GTG	>213.81.GTT	>213.58.TAA	>213.71.TAC
ETQIMAWFANKRHKIKKS	EMQIAGWFRNKRFKIKKS	EKQIMQWFWNKRAKIKKS	EKQIAMWFSNKRFKIKKS	EEQISWWFWNKRRKIKKS	EWQIKTWFKNKRFKIKKS	ETQIKNWFENKRRKIKKS	ERQISNWFHNKRVKIKKS	ERQISQWFWNKRYKIKKS	EAQIRYWFSNKRTKIKKS	ERQINKWFENKRMKIKKS	EWQIRKWFENKRFKIKKS	ERQIYYWFANKRTKIKKS	ESQIASWFHNKRNKIKKS	EKQIAYWFQNKRWKIKKS	EWQIWRWFANKR_KIKKS	EQQIADWFANKRRKIKKS	EGQISMWFRNKRRKIKKS	ERQIKKWFYNKRTKIKKS	EGQIVQWFSNKRRKIKKS	EYQITFWFQNKRKKIKKS	EKQIMDWFSNKRKKIKKS	EKQIMEWFCNKRKKIKKS	EIQISNWFGNKRKKIKKS	ESQIFNWFANKRSKIKKS	EVQIHNWFSNKRRKIKKS	ERQIMYWFDNKRRKIKKS	ETQILNWFSNKRRKIKKS	ELQIVYWFNNKRKKIKKS	ETQISYWFGNKRKKIKKS		EPQISFWFGNKRRKIKKS	EKQIFNWFKNKRWKIKKS		EVQISRWFWNKRWKIKKS	ESQISDWFRNKRWKIKKS	EEQILRWFQNKRQKIKKS		EKQILDWFRNKRHKIKKS	ERQISDWFRNKRMKIKKS	EKQICKWFDNKRSKIKKS		EQQILQWFWNKRQKIKKS	EGQILKWFSNKRSKIKKS	EGQIGKWFQNKRAKIKKS	EMQIRRWFGNKRFKIKKS	ELQIIRWFENKRYKIKKS	EVQITRWFGNKRYKIKKS	EIQISSWFYNKRKKIKKS	EEQIRVWFSNKRSKIKKS
>214.186.AAA	>214.111.AAC	>214.196.AAG	>214.132.AAT	>214.202.ACA	>214.128.ACC	>214.72.ACG	>214.88.ACT	>214.185.AGA	>214.169.AGC	>214.170.AGG	>214.190.AGT	>214.211.ATA	>214.23.ATC	>214.168.ATG	>214.106.ATT	>214.84.CAA	>214.69.CAC	>214.293.CAG	>214.110.CAT	>214.133.CCA	>214.287.CCC	>214.172.CCG	>214.100.CCT	>214.240.CGA	>214.199.CGC	>214.39.CGG	>214.169.CGT	>214.191.CTA	>214.30.CTC		>214.99.CTT	>214.57.GAA		>214.49.GAG	>214.26.GAT	>214.23.GCA		>214.28.GCG	>214.27.GCT	>214.62.GGA		>214.77.GGG	>214.76.GGT	>214.51.GTA	>214.29.GTC	>214.39.GTG	>214.81.GTT	>214.58.TAA	>214.71.TAC
ESQISSWFANKRFKIKKS	EYQICSWFRNKRHKIKKS	ERQILQWFWNKRYKIKKS	EIQISMWFINKRRKIKKS	ETQIKNWFENKRRKIKKS	ERQISNWFHNKRVKIKKS	ENQIKWWFENKRRKIKKS	ESQISNWFHNKRTKIKKS	EKQILCWFANKRVKIKKS	EVQISLWFENKRLKIKKS	EKQISKWFENKRMKIKKS	EEQIRRWFENKRYKIKKS	ERQISSWFANKRTKIKKS	ECQIASWFHNKRSKIKKS	ERQITYWFQNKRWKIKKS	ERQIVVWFQNKRSKIKKS	ESQIADWFANKRRKIKKS	EQQIMNWFSNKRRKIKKS	ECQISWWFWNKRRKIKKS	EIQIAYWFSNKRRKIKKS	ESQISNWFANKRKKIKKS	ETQIMNWFHNKRKKIKKS	ELQIQYWFENKRRKIKKS	ERQILDWFHNKRRKIKKS	EGQIFNWFSNKRRKIKKS	EVQISNWFSNKRRKIKKS	EKQISMWFENKRRKIKKS	EKQIMYWFSNKRAKIKKS	EMQITMWFCNKRKKIKKS	EMQISYWFQNKRKKIKKS		ESQIIYWFGNKRKKIKKS	EMQICRWFQNKRWKIKKS		EKQISVWFWNKRWKIKKS	EHQISRWFLNKRYKIKKS	ETQILRWFQNKRFKIKKS		EVQIMDWFRNKRYKIKKS	EVQILRWFKNKRYKIKKS	EDQIIKWFDNKRYKIKKS		ENQILKWFENKRQKIKKS	EKQINKWFGNKRWKIKKS	EHQICRWFQNKRCKIKKS	EEQIRRWFGNKRWKIKKS	ERQISTWFQNKRWKIKKS	EAQIRAWFANKRWKIKKS	EVQIIKWFNNKRRKIKKS	ESQIRVWFSNKRAKIKKS
>215.185.AAA	>215.109.AAC	>215.195.AAG	>215.132.AAT	>215.201.ACA	>215.126.ACC	>215.71.ACG	>215.88.ACT	>215.184.AGA	>215.168.AGC	>215.170.AGG	>215.189.AGT	>215.209.ATA	>215.23.ATC	>215.165.ATG	>215.106.ATT	>215.83.CAA	>215.68.CAC	>215.292.CAG	>215.110.CAT	>215.132.CCA	>215.287.CCC	>215.172.CCG	>215.98.CCT	>215.239.CGA	>215.198.CGC	>215.39.CGG	>215.168.CGT	>215.189.CTA	>215.30.CTC		>215.99.CTT	>215.57.GAA		>215.49.GAG	>215.26.GAT	>215.22.GCA		>215.28.GCG	>215.27.GCT	>215.62.GGA		>215.77.GGG	>215.76.GGT	>215.51.GTA	>215.29.GTC	>215.39.GTG	>215.81.GTT	>215.58.TAA	>215.69.TAC
ERQIQMWFANKRHKIKKS	EQQIASWFRNKRFKIKKS	ESQIQQWFWNKRYKIKKS	ERQITYWFTNKRYKIKKS	ERQISSWFHNKRTKIKKS	ERQIASWFHNKRVKIKKS	ERQIITWFQNKRNKIKKS	EKQIKDWFQNKRKKIKKS	ERQIRRWFNNKRYKIKKS	EKQIVRWFNNKRVKIKKS	ELQISKWFENKRYKIKKS	EMQIKKWFQNKRFKIKKS	ERQIHSWFANKRHKIKKS	EKQILEWFQNKRNKIKKS	E_QIPHWFSNKRPKIKKS	ESQIKHWFQNKRSKIKKS	EKQIAMWFQNKRRKIKKS	EKQIASWFSNKRRKIKKS	EYQIRRWFGNKRRKIKKS	EPQIMNWFSNKRRKIKKS	ETQIANWFSNKRKKIKKS	EQQISHWFENKRRKIKKS	ELQIMNWFQNKRKKIKKS	ERQISDWFANKRKKIKKS	ELQIHHWFANKRRKIKKS	ERQINDWFSNKRRKIKKS	ETQITNWFENKRRKIKKS	ESQIQNWFSNKRRKIKKS	ESQIAYWFANKRKKIKKS	EIQIRFWFSNKRRKIKKS		EVQIRNWFGNKRAKIKKS	ESQILRWFQNKRWKIKKS		ELQISTWFWNKRYKIKKS	EGQIVRWFSNKRYKIKKS	ELQIQRWFQNKRQKIKKS		EHQIGDWFRNKRYKIKKS	ERQIMDWFRNKRGKIKKS	ERQIVKWFDNKRSKIKKS		EYQILKWFENKRRKIKKS	ESQISKWFDNKRYKIKKS	ESQITRWFQNKRVKIKKS	EIQIRRWFGNKRFKIKKS	ERQIQIWFQNKRYKIKKS	EVQIMTWFANKRYKIKKS	EEQIRVWFVNKRAKIKKS	EAQIRVWFSNKRAKIKKS
>216.182.AAA	>216.109.AAC	>216.193.AAG	>216.131.AAT	>216.198.ACA	>216.123.ACC	>216.71.ACG	>216.87.ACT	>216.183.AGA	>216.168.AGC	>216.170.AGG	>216.187.AGT	>216.208.ATA	>216.23.ATC	>216.165.ATG	>216.106.ATT	>216.83.CAA	>216.68.CAC	>216.291.CAG	>216.110.CAT	>216.131.CCA	>216.287.CCC	>216.171.CCG	>216.97.CCT	>216.237.CGA	>216.197.CGC	>216.39.CGG	>216.167.CGT	>216.189.CTA	>216.30.CTC		>216.96.CTT	>216.57.GAA		>216.49.GAG	>216.26.GAT	>216.22.GCA		>216.28.GCG	>216.27.GCT	>216.61.GGA		>216.77.GGG	>216.76.GGT	>216.51.GTA	>216.29.GTC	>216.38.GTG	>216.80.GTT	>216.58.TAA	>216.69.TAC
ERQIQAWFANKRFKIKKS	EVQISGWFRNKRHKIKKS	ELQIAQWFWNKRHKIKKS	ERQIAQWFANKRHKIKKS	EVQISNWFNNKRRKIKKS	EKQIMTWFQNKRKKIKKS	ESQIVRWFENKRRKIKKS	EMQIYYWFKNKRAKIKKS	EKQIFRWFANKRQKIKKS	ERQIMRWFNNKRVKIKKS	EAQILFWFTNKREKIKKS	EKQINKWFENKRWKIKKS	ERQIVCWFANKRSKIKKS	ECQIASWFHNKRSKIKKS	ETQIVYWFQNKRWKIKKS	EHQIRIWFQNKRSKIKKS	ELQISYWFQNKRRKIKKS	EGQISMWFRNKRRKIKKS	ETQISYWFWNKRRKIKKS	ESQILQWFSNKRRKIKKS	EKQISTWFQNKRKKIKKS	ELQITNWFSNKRKKIKKS	ERQIQMWFENKRKKIKKS	ELQITNWFGNKRKKIKKS	EKQIGYWFGNKRAKIKKS	ETQIGMWFSNKRRKIKKS	EKQISHWFENKRRKIKKS	ERQIYNWFSNKRRKIKKS	EQQILTWFANKRKKIKKS	ETQILNWFSNKRKKIKKS		EVQITNWFSNKRRKIKKS	ELQILRWFQNKRWKIKKS		EVQISRWFWNKRYKIKKS	EAQIGRWFVNKRYKIKKS	EKQIVKWFQNKRNKIKKS		EGQIMDWFRNKRYKIKKS	EAQILRWFKNKRYKIKKS	EKQIMKWFDNKRWKIKKS		EQQIAKWFENKRSKIKKS	ERQIGKWFDNKRAKIKKS	EMQIMKWFQNKRSKIKKS	ELQISKWFRNKRSKIKKS	ESQIAKWFENKRAKIKKS	EVQIIKWFSNKRWKIKKS	ERQIVTWFVNKRAKIKKS	ERQIRLWFSNKRAKIKKS
>217.180.AAA	>217.109.AAC	>217.193.AAG	>217.130.AAT	>217.198.ACA	>217.123.ACC	>217.70.ACG	>217.86.ACT	>217.182.AGA	>217.167.AGC	>217.169.AGG	>217.187.AGT	>217.207.ATA	>217.23.ATC	>217.164.ATG	>217.106.ATT	>217.83.CAA	>217.68.CAC	>217.290.CAG	>217.109.CAT	>217.129.CCA	>217.287.CCC	>217.169.CCG	>217.97.CCT	>217.235.CGA	>217.197.CGC	>217.38.CGG	>217.161.CGT	>217.189.CTA	>217.30.CTC		>217.96.CTT	>217.57.GAA		>217.49.GAG	>217.25.GAT	>217.22.GCA		>217.28.GCG	>217.26.GCT	>217.61.GGA		>217.77.GGG	>217.75.GGT	>217.51.GTA	>217.28.GTC	>217.38.GTG	>217.80.GTT	>217.57.TAA	>217.69.TAC
EKQIAGWFSNKRHKIKKS	ELQIGQWFRNKRHKIKKS	ERQIMQWFWNKRFKIKKS	EVQILTWFSNKRHKIKKS	EKQISMWFQNKRRKIKKS	EVQILNWFANKRKKIKKS	ESQIRHWFENKRRKIKKS	ENQISSWFHNKRMKIKKS	ERQIYYWFNNKRYKIKKS	EKQISRWFNNKRVKIKKS	EPQIAKWFENKRYKIKKS	ERQIGKWFENKRHKIKKS	ERQISCWFANKRVKIKKS	EIQIASWFHNKRNKIKKS	EQQIRYWFQNKRSKIKKS	ELQIRVWFQNKRAKIKKS	EKQIAGWFSNKRRKIKKS	ERQIMMWFSNKRRKIKKS	EAQILLWFLNKRRKIKKS	EVQISGWFSNKRRKIKKS	ERQIMLWFQNKRKKIKKS	EKQIATWFSNKRKKIKKS	EIQITNWFHNKRRKIKKS	ELQIVYWFGNKRKKIKKS	ERQILMWFQNKRAKIKKS	EKQISMWFNNKRRKIKKS	ERQILLWFENKRRKIKKS	ETQISNWFGNKRRKIKKS	ECQIFYWFANKRKKIKKS	EVQIRNWFSNKRKKIKKS		ERQIQYWFGNKRKKIKKS	ERQISRWFQNKRWKIKKS		ERQIVQWFWNKRWKIKKS	EAQIAKWFVNKRWKIKKS	EKQITRWFQNKRMKIKKS		EVQIVRWFANKRSKIKKS	ERQINDWFRNKRYKIKKS	ERQIAKWFDNKRTKIKKS		EFQIMKWFENKRFKIKKS	ESQIIKWFNNKRFKIKKS	EWQIRKWFQNKRCKIKKS	EMQIQRWFGNKRFKIKKS	EGQIRRWFENKRFKIKKS	EVQITKWFSNKRFKIKKS	ERQILVWFANKRSKIKKS	ENQIRVWFSNKRAKIKKS
>218.179.AAA	>218.109.AAC	>218.193.AAG	>218.130.AAT	>218.196.ACA	>218.123.ACC	>218.69.ACG	>218.86.ACT	>218.180.AGA	>218.167.AGC	>218.167.AGG	>218.187.AGT	>218.206.ATA	>218.22.ATC	>218.164.ATG	>218.106.ATT	>218.83.CAA	>218.68.CAC	>218.288.CAG	>218.109.CAT	>218.128.CCA	>218.286.CCC	>218.168.CCG	>218.97.CCT	>218.235.CGA	>218.197.CGC	>218.37.CGG	>218.159.CGT	>218.186.CTA	>218.30.CTC		>218.95.CTT	>218.57.GAA		>218.49.GAG	>218.25.GAT	>218.22.GCA		>218.28.GCG	>218.26.GCT	>218.61.GGA		>218.76.GGG	>218.75.GGT	>218.51.GTA	>218.28.GTC	>218.38.GTG	>218.80.GTT	>218.57.TAA	>218.69.TAC
EKQIVYWFVNKRYKIKKS	EQQILSWFRNKRFKIKKS	ERQIAQWFWNKRCKIKKS	ERQIQSWFSNKRHKIKKS	ERQISTWFWNKRRKIKKS	ETQIVSWFHNKRTKIKKS	ERQIRYWFENKRRKIKKS	ERQIQSWFHNKRMKIKKS	ESQIFRWFANKRHKIKKS	ERQIIRWFNNKRVKIKKS	EEQIRGWFKNKRFKIKKS	ESQIIKWFENKRYKIKKS	EMQIAVWFNNKRFKIKKS	EGQIIQWFTNKRLKIKKS	EKQISTWFMNKRMKIKKS	ERQILVWFQNKRAKIKKS	EVQIHYWFSNKRRKIKKS	ETQIMTWFRNKRRKIKKS	EDQIF_WFINKRCKIKKS	EVQILTWFSNKRRKIKKS	EQQISMWFQNKRKKIKKS	ESQIRDWFHNKRKKIKKS	ERQISYWFENKRKKIKKS	EPQIIIWFSNKRGKIKKS	ERQITYWFDNKRRKIKKS	EEQIMNWFSNKRRKIKKS	EVQISRWFENKRRKIKKS	ERQIQDWFSNKRRKIKKS	EVQIFYWFANKRRKIKKS	ERQILNWFSNKRKKIKKS		ELQIVFWFGNKRSKIKKS	EEQITRWFQNKRWKIKKS		ERQINRWFWNKRWKIKKS	ELQIMVWFRNKRWKIKKS	EVQIHHWFRNKRAKIKKS		ERQILDWFRNKRYKIKKS	ESQIGDWFRNKRYKIKKS	EQQIHCWFSNKRYKIKKS		ERQILKWFENKRSKIKKS	EYQILKWFSNKRAKIKKS	ETQIGRWFQNKRAKIKKS	EGQISKWFRNKRAKIKKS	EKQIVKWFENKRWKIKKS	EAQIATWFRNKRFKIKKS	ERQITTWFSNKRSKIKKS	EHQIRVWFSNKRAKIKKS
>219.179.AAA	>219.108.AAC	>219.192.AAG	>219.130.AAT	>219.196.ACA	>219.122.ACC	>219.67.ACG	>219.85.ACT	>219.180.AGA	>219.164.AGC	>219.167.AGG	>219.186.AGT	>219.206.ATA	>219.22.ATC	>219.164.ATG	>219.106.ATT	>219.82.CAA	>219.68.CAC	>219.283.CAG	>219.109.CAT	>219.128.CCA	>219.286.CCC	>219.166.CCG	>219.97.CCT	>219.235.CGA	>219.196.CGC	>219.37.CGG	>219.159.CGT	>219.186.CTA	>219.30.CTC		>219.95.CTT	>219.57.GAA		>219.48.GAG	>219.25.GAT	>219.22.GCA		>219.27.GCG	>219.26.GCT	>219.61.GGA		>219.75.GGG	>219.75.GGT	>219.51.GTA	>219.28.GTC	>219.38.GTG	>219.80.GTT	>219.57.TAA	>219.68.TAC
ERQIHYWFVNKRVKIKKS	ESQIGAWFRNKRFKIKKS	EHQISQWFWNKRFKIKKS	EGQITSWFANKRFKIKKS	ERQITNWFNNKRAKIKKS	ELQITYWFANKRKKIKKS	ELQITHWFENKRRKIKKS	EWQISKWFMNKRTKIKKS	ERQISRWFWNKRYKIKKS	EDQIRCWFTNKRFKIKKS	EGQISKWFENKRAKIKKS	ELQISAWFHNKRDKIKKS	ERQISAWFANKRTKIKKS	ELQILTWFKNKRFKIKKS	EWQIYSWFKNKRYKIKKS	EKQIRIWFQNKRQKIKKS	EEQIHNWFVNKRRKIKKS	EMQIMMWFSNKRRKIKKS	ERQIMTWFWNKRRKIKKS	ECQIANWFSNKRRKIKKS	EKQILYWFQNKRKKIKKS	EVQIMDWFSNKRKKIKKS	EKQIVYWFQNKRKKIKKS	ELQIINWFSNKRKKIKKS	ERQIFYWFSNKRTKIKKS	ENQIHYWFSNKRRKIKKS	EKQIMRWFENKRRKIKKS	EVQIVNWFSNKRRKIKKS	EEQIMYWFANKRKKIKKS	EQQIMNWFRNKRKKIKKS		EVQIYYWFSNKRRKIKKS	EVQILRWFQNKRWKIKKS		ESQISKWFLNKRCKIKKS	ENQIRIWFSNKRYKIKKS	EKQILRWFQNKRRKIKKS		ELQIRSWFTNKRVKIKKS	EGQIVAWFKNKRFKIKKS	ERQIEKWFGNKRYKIKKS		EKQIMKWFENKRMKIKKS	EHQISKWFNNKRTKIKKS	EYQILRWFQNKRRKIKKS	EMQIRRWFGNKRAKIKKS	EQQIMRWFENKRYKIKKS	ERQIVRWFGNKRAKIKKS	EKQIAAWFSNKRAKIKKS	EGQIRVWFSNKRAKIKKS
>220.179.AAA	>220.108.AAC	>220.191.AAG	>220.129.AAT	>220.195.ACA	>220.121.ACC	>220.67.ACG	>220.85.ACT	>220.179.AGA	>220.163.AGC	>220.164.AGG	>220.185.AGT	>220.206.ATA	>220.22.ATC	>220.164.ATG	>220.105.ATT	>220.82.CAA	>220.68.CAC	>220.282.CAG	>220.109.CAT	>220.128.CCA	>220.286.CCC	>220.165.CCG	>220.95.CCT	>220.235.CGA	>220.196.CGC	>220.37.CGG	>220.159.CGT	>220.185.CTA	>220.30.CTC		>220.95.CTT	>220.57.GAA		>220.48.GAG	>220.25.GAT	>220.22.GCA		>220.27.GCG	>220.26.GCT	>220.61.GGA		>220.75.GGG	>220.75.GGT	>220.50.GTA	>220.28.GTC	>220.38.GTG	>220.79.GTT	>220.57.TAA	>220.68.TAC
EKQIMTWFANKRFKIKKS	ERQIGQWFRNKRHKIKKS	ETQIAQWFWNKRFKIKKS	ESQIASWFSNKRFKIKKS	ERQIMLWFQNKRRKIKKS	EKQIMNWFHNKRQKIKKS	ENQIRWWFDNKRRKIKKS	EKQIKNWFHNKRMKIKKS	EKQIVYWFNNKRWKIKKS	EVQIAQWFKNKRYKIKKS	EKQISKWFENKRVKIKKS	ERQIVKWFENKRMKIKKS	EKQIAAWFANKRVKIKKS	ESQIAQWFHNKRNKIKKS	EKQICSWFQNKRTKIKKS	EKQIVTWFQNKRNKIKKS	EIQIHYWFVNKRRKIKKS	EQQIGYWFSNKRRKIKKS	EVQISRWFWNKRRKIKKS	ETQIMTWFSNKRRKIKKS	ELQIGNWFANKRKKIKKS	EIQITYWFSNKRKKIKKS	EYQIMNWFQNKRKKIKKS	ERQIVNWFGNKRKKIKKS	ERQISHWFGNKRMKIKKS	ETQIRYWFSNKRKKIKKS	ERQIVTWFENKRRKIKKS	EVQIANWFSNKRRKIKKS	EQQIFYWFANKRKKIKKS	ESQIRFWFSNKRKKIKKS		EVQIVMWFSNKRRKIKKS	EVQIAHWFKNKRWKIKKS		EGQIMQWFWNKRWKIKKS	EAQICIWFRNKRYKIKKS	EGQIFHWFRNKRYKIKKS		EHQIRCWFLNKRRKIKKS	EVQINDWFRNKRFKIKKS	ETQILKWFDNKRQKIKKS		EGQILKWFENKRAKIKKS	EKQITKWFNNKRSKIKKS	EHQICKWFQNKRWKIKKS	ELQIGKWFRNKRMKIKKS	ERQIQKWFENKRWKIKKS	EFQINKWFANKRWKIKKS	ERQISNWFANKRAKIKKS	EQQIRVWFSNKRAKIKKS
>221.179.AAA	>221.108.AAC	>221.191.AAG	>221.129.AAT	>221.195.ACA	>221.121.ACC	>221.67.ACG	>221.84.ACT	>221.176.AGA	>221.163.AGC	>221.164.AGG	>221.185.AGT	>221.205.ATA	>221.22.ATC	>221.162.ATG	>221.105.ATT	>221.82.CAA	>221.68.CAC	>221.280.CAG	>221.109.CAT	>221.128.CCA	>221.283.CCC	>221.164.CCG	>221.95.CCT	>221.232.CGA	>221.195.CGC	>221.37.CGG	>221.158.CGT	>221.185.CTA	>221.29.CTC		>221.94.CTT	>221.57.GAA		>221.48.GAG	>221.25.GAT	>221.22.GCA		>221.27.GCG	>221.26.GCT	>221.61.GGA		>221.74.GGG	>221.75.GGT	>221.50.GTA	>221.28.GTC	>221.37.GTG	>221.79.GTT	>221.57.TAA	>221.68.TAC
ENQIYYWFVNKRHKIKKS	EAQILDWFRNKRFKIKKS	ERQIVQWFWNKRFKIKKS	EHQISGWFSNKRFKIKKS	ERQITSWFHNKRQKIKKS	EKQISQWFHNKRMKIKKS	EKQILFWFRNKRSKIKKS	ERQITSWFHNKRMKIKKS	ERQINRWFWNKRYKIKKS	EKQIGRWFNNKRVKIKKS	EKQIVKWFENKRSKIKKS	ERQIVSWFWNKRQKIKKS	ERQIGMWFANKRHKIKKS	ERQIASWFHNKRNKIKKS	ERQIVYWFQNKRTKIKKS	ERQIVVWFQNKRRKIKKS	EMQIHHWFANKRRKIKKS	ELQIAMWFRNKRRKIKKS	ELQISRWFWNKRRKIKKS	ERQIACWFSNKRRKIKKS	EVQIMYWFQNKRKKIKKS	EVQIQNWFSNKRKKIKKS	EIQIVYWFENKRRKIKKS	ESQIACWFSNKRKKIKKS	EVQIFYWFSNKRRKIKKS	EKQISCWFNNKRRKIKKS	ERQIRTWFENKRRKIKKS	EKQIEDWFSNKRRKIKKS	EPQIHMWFANKRRKIKKS	ETQITNWFQNKRKKIKKS		EKQIGYWFSNKRRKIKKS	EHQISRWFQNKRWKIKKS		ELQISRWFWNKRWKIKKS	EEQILVWFRNKRYKIKKS	ESQIIKWFQNKRAKIKKS		EKQILDWFRNKRFKIKKS	ERQIRAWFKNKRYKIKKS	ERQITKWFDNKRQKIKKS		ELQINKWFENKRAKIKKS	EEQISKWFSNKRVKIKKS	EGQINRWFQNKRGKIKKS	ECQIRRWFGNKRFKIKKS	EVQIVKWFENKRYKIKKS	EWQIRVWFANKRYKIKKS	ERQIVLWFRNKRAKIKKS	EYQIRIWFSNKRAKIKKS
>222.178.AAA	>222.107.AAC	>222.191.AAG	>222.125.AAT	>222.194.ACA	>222.120.ACC	>222.66.ACG	>222.83.ACT	>222.176.AGA	>222.161.AGC	>222.163.AGG	>222.185.AGT	>222.204.ATA	>222.22.ATC	>222.162.ATG	>222.104.ATT	>222.82.CAA	>222.68.CAC	>222.279.CAG	>222.109.CAT	>222.127.CCA	>222.283.CCC	>222.164.CCG	>222.95.CCT	>222.230.CGA	>222.194.CGC	>222.37.CGG	>222.153.CGT	>222.184.CTA	>222.29.CTC		>222.92.CTT	>222.56.GAA		>222.48.GAG	>222.25.GAT	>222.22.GCA		>222.27.GCG	>222.26.GCT	>222.60.GGA		>222.74.GGG	>222.75.GGT	>222.50.GTA	>222.28.GTC	>222.37.GTG	>222.78.GTT	>222.56.TAA	>222.68.TAC
EKQISSWFANKRHKIKKS	EQQIGSWFRNKRHKIKKS	ERQIGQWFWNKRFKIKKS	ERQIAAWFANKRFKIKKS	ELQISWWFWNKRRKIKKS	ERQITNWFHNKRTKIKKS	ELQIKYWFENKRRKIKKS	ESQIRSWFHNKRVKIKKS	ELQIKRWFINKRYKIKKS	EKQIMCWFSNKRVKIKKS	E_QILLWFRNKRFKIKKS	ERQIRRWFENKRWKIKKS	EKQIHSWFANKRWKIKKS	EAQIPPWFLNKRGKIKKS	EPQIKVWFLNKRVKIKKS	EYQIRIWFQNKRAKIKKS	EIQISYWFSNKRRKIKKS	EIQIAMWFRNKRRKIKKS	ERQIRYWFWNKRRKIKKS	ERQIQDWFSNKRRKIKKS	EQQIGCWFANKRKKIKKS	ERQIQTWFSNKRKKIKKS	ERQICDWFQNKRKKIKKS	EVQISNWFANKRKKIKKS	ELQITYWFGNKRRKIKKS	EVQIRNWFMNKRRKIKKS	ESQISRWFENKRRKIKKS	EKQITDWFSNKRRKIKKS	EMQITYWFANKRKKIKKS	ENQIRYWFSNKRKKIKKS		EIQISYWFANKRKKIKKS	EHQIARWFQNKRWKIKKS		ELQISRWFWNKRWKIKKS	EWQISRWFLNKRYKIKKS	EQQIHNWFRNKRAKIKKS		ERQINDWFRNKRWKIKKS	EGQILDWFRNKRFKIKKS	EKQITKWFDNKRHKIKKS		ERQISKWFENKRRKIKKS	EVQITKWFNNKRAKIKKS	ELQIARWFQNKRCKIKKS	ELQIYQWF_NKRPKIKKS	EKQIGKWFENKRQKIKKS	ERQINRWFGNKRYKIKKS	EYQIRIWFANKRAKIKKS	EYQIQRWFINKRFKIKKS
>223.178.AAA	>223.106.AAC	>223.190.AAG	>223.125.AAT	>223.194.ACA	>223.118.ACC	>223.66.ACG	>223.83.ACT	>223.176.AGA	>223.160.AGC	>223.159.AGG	>223.184.AGT	>223.204.ATA	>223.22.ATC	>223.161.ATG	>223.104.ATT	>223.82.CAA	>223.67.CAC	>223.278.CAG	>223.109.CAT	>223.127.CCA	>223.282.CCC	>223.162.CCG	>223.94.CCT	>223.229.CGA	>223.194.CGC	>223.36.CGG	>223.148.CGT	>223.181.CTA	>223.29.CTC		>223.91.CTT	>223.56.GAA		>223.48.GAG	>223.25.GAT	>223.21.GCA		>223.27.GCG	>223.26.GCT	>223.60.GGA		>223.74.GGG	>223.74.GGT	>223.50.GTA	>223.27.GTC	>223.37.GTG	>223.78.GTT	>223.56.TAA	>223.68.TAC
ESQIASWFANKRHKIKKS	EMQIATWFRNKRFKIKKS	EKQIAQWFWNKRCKIKKS	ETQISSWFRNKRHKIKKS	EQQIKHWFWNKRRKIKKS	ELQIVYWFKNKRMKIKKS	ELQIRRWFDNKRRKIKKS	EKQISYWFHNKRVKIKKS	EGQIFRWFANKRAKIKKS	ERQIARWFNNKRVKIKKS	ERQIKKWFENKRVKIKKS	EQQISRWFNNKRVKIKKS	ERQISAWFANKRTKIKKS	ETQITGWFNNKRPKIKKS	EWQIANWFGNKRMKIKKS	EIQIGSWFANKRRKIKKS	ELQIFHWFANKRRKIKKS	ESQIMMWFRNKRRKIKKS	ERQIAAWFWNKRRKIKKS	EAQIANWFGNKRRKIKKS	ESQITTWFQNKRKKIKKS	EMQIVCWFSNKRKKIKKS	ETQISNWFWNKRKKIKKS	EKQIANWFGNKRKKIKKS	ERQIAYWFGNKRAKIKKS	EVQIGYWFSNKRRKIKKS	ERQIYYWFDNKRRKIKKS	EVQIVNWFSNKRRKIKKS	EPQIMWWFSNKRKKIKKS	EVQIRYWFSNKRKKIKKS		ERQIMMWFSNKRKKIKKS	EKQISYWFKNKRWKIKKS		ELQITRWFWNKRYKIKKS	RAADRPWFQNKRRKIKKS	EAQIFNWFRNKRFKIKKS		EQQICDWFRNKRFKIKKS	EGQIITWFKNKRFKIKKS	EIQIANWFNNKRVKIKKS		EKQILRWFENKRYKIKKS	EKQITKWFDNKRTKIKKS	EPQISRWFQNKRLKIKKS	ESQIMRWFGNKRFKIKKS	EQQIGKWFENKRWKIKKS	ELQIRVWFANKRYKIKKS	ERQIAVWFANKRQKIKKS	EQQIRVWFSNKRVKIKKS
>224.178.AAA	>224.105.AAC	>224.188.AAG	>224.124.AAT	>224.193.ACA	>224.118.ACC	>224.66.ACG	>224.83.ACT	>224.174.AGA	>224.160.AGC	>224.158.AGG	>224.184.AGT	>224.203.ATA	>224.22.ATC	>224.160.ATG	>224.103.ATT	>224.81.CAA	>224.67.CAC	>224.277.CAG	>224.109.CAT	>224.127.CCA	>224.281.CCC	>224.162.CCG	>224.93.CCT	>224.228.CGA	>224.194.CGC	>224.36.CGG	>224.145.CGT	>224.181.CTA	>224.29.CTC		>224.91.CTT	>224.56.GAA		>224.48.GAG	>224.25.GAT	>224.21.GCA		>224.27.GCG	>224.26.GCT	>224.60.GGA		>224.73.GGG	>224.74.GGT	>224.49.GTA	>224.27.GTC	>224.37.GTG	>224.78.GTT	>224.55.TAA	>224.67.TAC
EQQITMWFANKRFKIKKS	ELQIAQWFRNKRYKIKKS	ERQISSWFWNKRHKIKKS	ERQIATWFCNKRPKIKKS	ETQIRNWFHNKRRKIKKS	EIQIQYWFHNKRQKIKKS	ERQIMYWFDNKRRKIKKS	E_QITTWFKNKRSKIKKS	ERQIRAWFNNKRWKIKKS	RAPDLHLFGNKRTKIKKS	EKQIMKWFENKRQKIKKS	EKQIDKWFQNKRFKIKKS	ERQINSWFCNKRAKIKKS	ECQIASWFHNKRCKIKKS	EQQIVSWFQNKRMKIKKS	EKQIRLWFQNKRAKIKKS	ELQIATWFANKRRKIKKS	EGQICMWFRNKRRKIKKS	ELQILIWFSNKRAKIKKS	ECQISSWFSNKRRKIKKS	ETQIMMWFQNKRKKIKKS	EIQIVTWFSNKRKKIKKS	ERQISNWFQNKRKKIKKS	ERQIAMWFSNKRKKIKKS	EEQIFYWFANKRSKIKKS	ERQISCWFNNKRKKIKKS	EMQIRWWFENKRRKIKKS	ERQINNWFSNKRRKIKKS	ESQIMYWFSNKRKKIKKS	EIQIRYWFSNKRKKIKKS		ENQIMYWFGNKRKKIKKS	EGQILRWFQNKRFKIKKS		ELQIQRWFWNKRWKIKKS	EIQIMSWFRNKRWKIKKS	EMQIAKWFANKRAKIKKS		EKQIMDWFRNKRYKIKKS	ERQILDWFRNKRFKIKKS	ESQIGKWFDNKRQKIKKS		EPQISMWFVNKRDKIKKS	ETQILKWFNNKRQKIKKS	ECQIFHWFKNKRMKIKKS	ESQIGKWFRNKRFKIKKS	EWQISIWFHNKRVKIKKS	EFQISNWFRNKRWKIKKS	ERQISLWFCNKRAKIKKS	EWQIRVWFSNKRAKIKKS
>225.178.AAA	>225.105.AAC	>225.188.AAG	>225.124.AAT	>225.192.ACA	>225.116.ACC	>225.65.ACG	>225.83.ACT	>225.173.AGA	>225.159.AGC	>225.158.AGG	>225.182.AGT	>225.203.ATA	>225.21.ATC	>225.159.ATG	>225.103.ATT	>225.81.CAA	>225.67.CAC	>225.275.CAG	>225.108.CAT	>225.126.CCA	>225.278.CCC	>225.161.CCG	>225.91.CCT	>225.228.CGA	>225.194.CGC	>225.36.CGG	>225.143.CGT	>225.181.CTA	>225.29.CTC		>225.91.CTT	>225.56.GAA		>225.47.GAG	>225.25.GAT	>225.21.GCA		>225.27.GCG	>225.26.GCT	>225.59.GGA		>225.73.GGG	>225.74.GGT	>225.49.GTA	>225.27.GTC	>225.37.GTG	>225.78.GTT	>225.55.TAA	>225.67.TAC
ESQISSWFANKRHKIKKS	ERQISSWFRNKRHKIKKS	ELQIKYWFGNKRKKIKKS	EVQIVYWFTNKRAKIKKS	EVQIRDWFNNKRRKIKKS	ERQIISWFHNKRSKIKKS	EVQIRRWFENKRRKIKKS	ERQITSWFHNKRMKIKKS	ESQIFRWFANKRQKIKKS	EVQISRWFNNKRTKIKKS	EKQITKWFDNKRTKIKKS	ERQITKWFENKRCKIKKS	ESQIRSWFSNKRAKIKKS	ESQIGSWFSNKRTKIKKS	ERQIFYWFQNKRWKIKKS	ELQIKVWFQNKRAKIKKS	ERQILDWFANKRRKIKKS	EKQILTWFSNKRRKIKKS	ERQIPFWFVNKRKKIKKS	EKQIMQWFSNKRRKIKKS	EKQISYWFQNKRKKIKKS	ETQITNWFSNKRKKIKKS	ETQIANWFQNKRKKIKKS	EMQIGNWFHNKRKKIKKS	ETQIFNWFANKRRKIKKS	EQQITGWFSNKRRKIKKS	EAQIVNWFENKRRKIKKS	ESQISNWFSNKRRKIKKS	ETQISYWFANKRRKIKKS	EVQIRNWFGNKRRKIKKS		EVQINNWFANKRKKIKKS	EAQIRRWFQNKRWKIKKS		EYQIMRWFWNKRYKIKKS	ERQIGVWFRNKRYKIKKS	EGQIAKWFQNKRSKIKKS		ERQITDWFRNKRFKIKKS	EHQIRAWFKNKRYKIKKS	EKQIVKWFDNKRQKIKKS		EAQIMKWFENKRWKIKKS	EKQILKWFDNKRWKIKKS	EVQITRWFQNKRVKIKKS	EYQIRRWFGNKRWKIKKS	ERQITKWFENKRYKIKKS	EKQITVWFANKRYKIKKS	ERQIGVWFSNKRAKIKKS	EVQICRWFINKRAKIKKS
>226.177.AAA	>226.105.AAC	>226.185.AAG	>226.124.AAT	>226.191.ACA	>226.115.ACC	>226.65.ACG	>226.82.ACT	>226.173.AGA	>226.159.AGC	>226.156.AGG	>226.182.AGT	>226.203.ATA	>226.21.ATC	>226.154.ATG	>226.102.ATT	>226.81.CAA	>226.67.CAC	>226.273.CAG	>226.108.CAT	>226.126.CCA	>226.277.CCC	>226.161.CCG	>226.91.CCT	>226.227.CGA	>226.193.CGC	>226.36.CGG	>226.143.CGT	>226.180.CTA	>226.28.CTC		>226.91.CTT	>226.56.GAA		>226.47.GAG	>226.25.GAT	>226.21.GCA		>226.27.GCG	>226.26.GCT	>226.59.GGA		>226.72.GGG	>226.74.GGT	>226.49.GTA	>226.27.GTC	>226.36.GTG	>226.77.GTT	>226.54.TAA	>226.67.TAC
ELQIRYWFANKRHKIKKS	ESQINSWFRNKRFKIKKS	EKQIQQWFWNKRAKIKKS	ERQIMSWFANKRFKIKKS	EKQIANWFNNKRRKIKKS	EAQIRYWFENKRKKIKKS	ELQIIHWFENKRRKIKKS	ERQIGSWFHNKRMKIKKS	E_QIVFWFINKRIKIKKS	EKQIKSWFSNKRVKIKKS	EFQIAKWFENKRFKIKKS	EKQICKWFENKRWKIKKS	EVQIHSWFANKRMKIKKS	ESQIAQWFRNKRFKIKKS	EVQIQYWFQNKRWKIKKS	ERQISVWFQNKRNKIKKS	ETQIFNWFANKRRKIKKS	EVQIGMWFRNKRRKIKKS	EPQISWWFWNKRRKIKKS	EWQIANWFANKRRKIKKS	ETQIMTWFQNKRKKIKKS	EGQILNWFSNKRKKIKKS	EAQIRYWFENKRKKIKKS	ETQILNWFHNKRKKIKKS	ERQIRDWFANKRVKIKKS	EVQIRNWFSNKRQKIKKS	EKQISRWFENKRRKIKKS	ETQIANWFSNKRRKIKKS	ELQITYWFCNKRKKIKKS	EHQISFWFSNKRKKIKKS		ESQIVYWFGNKRKKIKKS	ERQIGRWFQNKRHKIKKS		ENQISRWFWNKRYKIKKS	ESQISVWFRNKRWKIKKS	EQQILKWFQNKRLKIKKS		EYQIHGWFKNKRYKIKKS	EAQILCWFKNKRYKIKKS	EFQILKWFDNKRQKIKKS		EKQIEKWFENKRRKIKKS	ERQIMKWFDNKRMKIKKS	EQQILRWFQNKRMKIKKS	EGQITRWFGNKRYKIKKS	EWQIRKWFENKRWKIKKS	ELQIKIWFANKRYKIKKS	ERQISVWFSNKRSKIKKS	ETQIRLWFSNKRAKIKKS
>227.177.AAA	>227.105.AAC	>227.184.AAG	>227.123.AAT	>227.191.ACA	>227.115.ACC	>227.65.ACG	>227.82.ACT	>227.173.AGA	>227.156.AGC	>227.155.AGG	>227.181.AGT	>227.203.ATA	>227.21.ATC	>227.153.ATG	>227.102.ATT	>227.81.CAA	>227.67.CAC	>227.271.CAG	>227.108.CAT	>227.125.CCA	>227.277.CCC	>227.158.CCG	>227.90.CCT	>227.225.CGA	>227.193.CGC	>227.35.CGG	>227.137.CGT	>227.180.CTA	>227.28.CTC		>227.90.CTT	>227.56.GAA		>227.46.GAG	>227.25.GAT	>227.21.GCA		>227.27.GCG	>227.26.GCT	>227.58.GGA		>227.72.GGG	>227.74.GGT	>227.49.GTA	>227.27.GTC	>227.36.GTG	>227.77.GTT	>227.54.TAA	>227.67.TAC
ERQIYYWFVNKRHKIKKS	ETQITGWFRNKRHKIKKS	ERQIRQWFWNKRFKIKKS	EKQIMAWFSNKRFKIKKS	ERQICDWFNNKRRKIKKS	ERQIMTWFANKRKKIKKS	EKQIMCWFQNKRNKIKKS	ERQIKNWFQNKRRKIKKS	EKQIARWFWNKRYKIKKS	ERQIMGWFANKRVKIKKS	STRSSRGSPTSGWKIKKS	EVQIRKWFENKRFKIKKS	EKQISCWFANKRVKIKKS	ECQIASWFHNKRVKIKKS	EVQIVYWFQNKRHKIKKS	ERQIKIWFQNKRTKIKKS	ETQIHNWFCNKRRKIKKS	EEQIAMWFRNKRRKIKKS	EDQISWWFWNKRRKIKKS	EGQIANWFTNKRRKIKKS	EQQIANWFANKRKKIKKS	ELQIMTWFSNKRKKIKKS	EDQITNWFHNKRKKIKKS	ERQILDWFANKRKKIKKS	EMQIVYWFGNKRAKIKKS	EVQIGYWFSNKRRKIKKS	EKQIHYWFENKRRKIKKS	EKQIGNWFSNKRRKIKKS	ETQIAYWFANKRRKIKKS	ERQIITWFQNKRDKIKKS		EKQIIDWFSNKRKKIKKS	EAQIENWFKNKRYKIKKS		EEQISRWFWNKRYKIKKS	ERQIMEWFRNKRYKIKKS	EQQILRWFQNKRAKIKKS		EGQIAHWFCNKRFKIKKS	EGQIRDWFRNKRYKIKKS	EVQISKWFDNKRQKIKKS		ESQIMKWFENKRGKIKKS	EIQIMKWFNNKRWKIKKS	EFQIMRWFQNKRRKIKKS	EGQIGRWFRNKRWKIKKS	ERQITKWFENKRRKIKKS	EDQIRRWFDNKRAKIKKS	EPQILRWFANKRAKIKKS	EQQIRVWFSNKRVKIKKS
>228.176.AAA	>228.105.AAC	>228.184.AAG	>228.121.AAT	>228.191.ACA	>228.114.ACC	>228.65.ACG	>228.82.ACT	>228.172.AGA	>228.156.AGC	>228.154.AGG	>228.181.AGT	>228.202.ATA	>228.21.ATC	>228.149.ATG	>228.102.ATT	>228.81.CAA	>228.66.CAC	>228.265.CAG	>228.107.CAT	>228.125.CCA	>228.276.CCC	>228.158.CCG	>228.90.CCT	>228.224.CGA	>228.191.CGC	>228.35.CGG	>228.136.CGT	>228.180.CTA	>228.27.CTC		>228.90.CTT	>228.56.GAA		>228.46.GAG	>228.25.GAT			>228.27.GCG	>228.26.GCT	>228.58.GGA		>228.71.GGG	>228.74.GGT	>228.49.GTA	>228.27.GTC	>228.36.GTG	>228.77.GTT	>228.53.TAA	>228.66.TAC
ERQIMYWFVNKRHKIKKS	EAQIGSWFRNKRFKIKKS	EPQIMQWFWNKRFKIKKS	EKQISAWFSNKRFKIKKS	ESQIQYWFWNKRRKIKKS	EKQITSWFKNKRNKIKKS	EYQISGWFLNKRLKIKKS	EKQIMGWFHNKRMKIKKS	ESQIRRWFNNKRWKIKKS	EQQISRWFNNKRVKIKKS	EYQIVRWFLNKRTKIKKS	ETQINKWFMNKRWKIKKS	EQQITRWFANKRMKIKKS	ERQIRRWFGNKRNKIKKS	ERQISVWFQNKRDKIKKS	ERQIKTWFQNKRAKIKKS	ESQIFYWFSNKRRKIKKS	EGQIAQWFRNKRRKIKKS	ERQINYWFWNKRRKIKKS	EQQIYYWFSNKRRKIKKS	ENQITNWFANKRKKIKKS	ELQITNWFSNKRKKIKKS	EKQIMNWFENKRKKIKKS	ELQIIYWFSNKRKKIKKS	ESQIHFWFANKRAKIKKS	ETQIATWFSNKRRKIKKS	EKQIIWWFENKRRKIKKS	EVQITNWFGNKRMKIKKS	ETQISHWFANKRKKIKKS	EVQILNWFSNKRKKIKKS		ESQIAHWFSNKRKKIKKS	EFQIFHWFKNKRHKIKKS		ERQIRQWFWNKRYKIKKS	EYQISRWFLNKRYKIKKS			ESQIMDWFRNKRYKIKKS	ESQIVVWFKNKRYKIKKS	ECQIAKWFDNKRWKIKKS		ELQIMKWFENKRRKIKKS	EKQIIKWFNNKRMKIKKS	EKQIKKWFQNKRGKIKKS	EVQITKWFRNKRFKIKKS	ESQIGKWFMNKRWKIKKS	EMQIAAWFANKRYKIKKS	ERQIEVWFANKRAKIKKS	EGQIRVWFSNKRAKIKKS
>229.175.AAA	>229.104.AAC	>229.183.AAG	>229.120.AAT	>229.190.ACA	>229.113.ACC	>229.63.ACG	>229.81.ACT	>229.171.AGA	>229.154.AGC	>229.153.AGG	>229.180.AGT	>229.199.ATA	>229.21.ATC	>229.146.ATG	>229.102.ATT	>229.80.CAA	>229.66.CAC	>229.265.CAG	>229.107.CAT	>229.124.CCA	>229.275.CCC	>229.155.CCG	>229.89.CCT	>229.223.CGA	>229.190.CGC	>229.35.CGG	>229.136.CGT	>229.179.CTA	>229.27.CTC		>229.89.CTT	>229.55.GAA		>229.46.GAG	>229.24.GAT			>229.27.GCG	>229.26.GCT	>229.56.GGA		>229.71.GGG	>229.74.GGT	>229.49.GTA	>229.27.GTC	>229.36.GTG	>229.77.GTT	>229.53.TAA	>229.66.TAC
EKQINSWFSNKRHKIKKS	EAQIAQWFRNKRHKIKKS	ERQIVQWFWNKRFKIKKS	ERQITNWFSNKRFKIKKS	ELQIRYWFDNKRRKIKKS	ERQIMTWFSNKRKKIKKS	ERQIKWWFENKRRKIKKS	EIQIATWFFNKRSKIKKS	EAQIFRWFANKRWKIKKS	ESQILRWFSNKRVKIKKS	EMQIRKWFENKRRKIKKS	EKQIYWWFSNKRWKIKKS	EEQILCWFLNKRPKIKKS	ESQIVRWFGNKRNKIKKS	ERQITTWFQNKRQKIKKS	EVQIKVWFQNKRNKIKKS	EVQIAYWFANKRRKIKKS	EPQISNWFSNKRRKIKKS	ELQIKYWFWNKRRKIKKS	EVQILQWFSNKRRKIKKS	ETQIGYWFANKRKKIKKS	EGQIRNWFSNKRKKIKKS	ERQITYWFENKRRKIKKS	ESQISQWFSNKRKKIKKS	ERQISHWFGNKRAKIKKS	ERQIAHWFSNKRRKIKKS	EVQILRWFENKRRKIKKS	EVQITYWFSNKRRKIKKS	EAQISYWFANKRRKIKKS	ELQIRYWFSNKRKKIKKS		EIQIVYWFGNKRKKIKKS	EMQITRWFQNKRFKIKKS		ERQILQWFWNKRYKIKKS	ELQILSWFRNKRYKIKKS			EMQITDWFRNKRHKIKKS	EEQIIDWFRNKRYKIKKS	EKQIGKWFDNKRCKIKKS		EKQIIKWFENKRTKIKKS	EKQIVKWFDNKRQKIKKS	EQQILRWFQNKRRKIKKS	ERQITGWFCNKRVKIKKS	ERQIAKWFENKRFKIKKS	ENQIARWFGNKRFKIKKS	EEQIRVWFCNKRSKIKKS	EGQIRVWFSNKRAKIKKS
>230.175.AAA	>230.104.AAC	>230.182.AAG	>230.118.AAT	>230.189.ACA	>230.112.ACC	>230.63.ACG	>230.80.ACT	>230.170.AGA	>230.153.AGC	>230.152.AGG	>230.180.AGT	>230.199.ATA	>230.21.ATC	>230.146.ATG	>230.101.ATT	>230.80.CAA	>230.66.CAC	>230.265.CAG	>230.107.CAT	>230.124.CCA	>230.275.CCC	>230.154.CCG	>230.89.CCT	>230.223.CGA	>230.189.CGC	>230.35.CGG	>230.135.CGT	>230.179.CTA	>230.27.CTC		>230.88.CTT	>230.55.GAA		>230.46.GAG	>230.24.GAT			>230.27.GCG	>230.25.GCT	>230.56.GGA		>230.70.GGG	>230.74.GGT	>230.49.GTA	>230.27.GTC	>230.36.GTG	>230.77.GTT	>230.53.TAA	>230.66.TAC
EKQIKQWFWNKRHKIKKS	EKQISAWFRNKRFKIKKS	EGQIMQWFWNKRYKIKKS	ECQIGTWFRNKRLKIKKS	ESQIHSWFANKRRKIKKS	ESQIASWFHNKRVKIKKS	ERQINWWFDNKRRKIKKS	ELQIKAWFKNKRFKIKKS	EAQIKVWFPNKRRKIKKS	ESQIRSWFSNKRVKIKKS	EPQILKWFENKRAKIKKS	EFQISKWFENKRFKIKKS	ELQIVSWFANKRFKIKKS	ETQIRMWFNNKRNKIKKS	ERQIRQWFRNKRVKIKKS	ERQIHVWFQNKRAKIKKS	EMQIHYWFSNKRRKIKKS	ELQISMWFRNKRRKIKKS	EKQIQYWFWNKRRKIKKS	ERQISNWFLNKRRKIKKS	EVQILNWFQNKRKKIKKS	ETQILCWFSNKRKKIKKS	EKQIRYWFENKRKKIKKS	EMQILNWFANKRKKIKKS	ERQIHYWFANKRAKIKKS	ELQIMYWFSNKRRKIKKS	ERQIVHWFENKRRKIKKS	EVQIINWFSNKRRKIKKS	EMQIAYWFANKRKKIKKS	EVQIMNWFGNKRKKIKKS		ERQIGQWFSNKRKKIKKS	ELQIMRWFQNKRWKIKKS		EQQIAVWFVNKRYKIKKS	EVQITLWFRNKRYKIKKS			EYQIAGWFKNKRYKIKKS	EPQILHWFRNKRYKIKKS	ELQIRKWFDNKRQKIKKS		EQQISKWFENKRRKIKKS	ECQISKWFNNKRTKIKKS	EPQIMRWFQNKRLKIKKS	EKQINKWFRNKRWKIKKS	EGQIARWFENKRFKIKKS	EIQIGRWFANKRFKIKKS	ERQICLWFRNKRSKIKKS	ETQIRIWFSNKRVKIKKS
>231.174.AAA	>231.104.AAC	>231.182.AAG	>231.117.AAT	>231.189.ACA	>231.111.ACC	>231.62.ACG	>231.80.ACT	>231.168.AGA	>231.152.AGC	>231.152.AGG	>231.180.AGT	>231.199.ATA		>231.145.ATG	>231.100.ATT	>231.80.CAA	>231.66.CAC	>231.263.CAG	>231.107.CAT	>231.124.CCA	>231.274.CCC	>231.153.CCG	>231.88.CCT	>231.222.CGA	>231.187.CGC	>231.35.CGG	>231.135.CGT	>231.178.CTA	>231.27.CTC		>231.88.CTT	>231.55.GAA		>231.45.GAG	>231.24.GAT			>231.27.GCG	>231.25.GCT	>231.56.GGA		>231.70.GGG	>231.73.GGT	>231.49.GTA	>231.26.GTC	>231.35.GTG	>231.77.GTT	>231.52.TAA	>231.66.TAC
ERQIMTWFANKRHKIKKS	EVQIAVWFRNKRFKIKKS	EKQISSWFWNKRHKIKKS	EFQIGEWFLNKRMKIKKS	ERQISDWFNNKRRKIKKS	EGQIRMWFKNKRTKIKKS	EKQIVYWFENKRRKIKKS	EKQIMHWFHNKRMKIKKS	EVQIKRWFTNKRWKIKKS	EQQINRWFNNKRVKIKKS	EEQIAKWFENKRYKIKKS	ERQIKKWFENKRSKIKKS	ERQIFSWFANKRAKIKKS		ERQIMYWFQNKRTKIKKS	EAQIRVWFQNKRQKIKKS	ELQIFWWFANKRRKIKKS	ESQIRMWFSNKRRKIKKS	EKQIAWWFWNKRRKIKKS	EKQISMWFGNKRRKIKKS	EKQIQTWFQNKRKKIKKS	ELQILNWFSNKRKKIKKS	EMQISNWFWNKRKKIKKS	EKQILQWFSNKRKKIKKS	ELQIRYWFGNKRSKIKKS	ERQISMWFSNKRRKIKKS	EQQISHWFENKRRKIKKS	EKQIYYWFSNKRRKIKKS	ELQISHWFSNKRKKIKKS	ERQILNWFSNKRKKIKKS		EGQIYNWFANKRKKIKKS	ELQISHWFKNKRWKIKKS		EVQIMQWFWNKRYKIKKS	EPQIARWFINKRYKIKKS			EQQIMDWFRNKRRKIKKS	EVQIKLWFKNKRWKIKKS	EKQISKWFDNKRFKIKKS		EVQIAKWFENKRRKIKKS	ETQISKWFDNKRQKIKKS	ERQIVRWFQNKRVKIKKS	ERQISRWFANKRFKIKKS	EKQIYTWFQNKRYKIKKS	ETQIIRWFGNKRYKIKKS	ERQITVWFSNKRSKIKKS	EEQIRVWFSNKRAKIKKS
>232.173.AAA	>232.104.AAC	>232.182.AAG	>232.117.AAT	>232.186.ACA	>232.110.ACC	>232.61.ACG	>232.80.ACT	>232.166.AGA	>232.152.AGC	>232.151.AGG	>232.179.AGT	>232.199.ATA		>232.143.ATG	>232.100.ATT	>232.80.CAA	>232.66.CAC	>232.262.CAG	>232.106.CAT	>232.124.CCA	>232.271.CCC	>232.153.CCG	>232.87.CCT	>232.222.CGA	>232.186.CGC	>232.34.CGG	>232.135.CGT	>232.176.CTA	>232.27.CTC		>232.88.CTT	>232.55.GAA		>232.45.GAG	>232.24.GAT			>232.27.GCG	>232.25.GCT	>232.55.GGA		>232.69.GGG	>232.73.GGT	>232.49.GTA	>232.26.GTC	>232.35.GTG	>232.77.GTT	>232.52.TAA	>232.66.TAC
EVQISTWFANKRHKIKKS	EGQISQWFRNKRFKIKKS	ERQISQWFWNKRYKIKKS	EKQIASWFSNKRHKIKKS	ENQISNWFNNKRRKIKKS	ERQIINWFHNKRMKIKKS	ERQIRYWFENKRRKIKKS	EKQIASWFHNKRMKIKKS	ETQIRWWFLNKRVKIKKS	EGQIQDWFGNKRCKIKKS	ERQIRKWFENKRRKIKKS	ELQIRKWFENKRLKIKKS	EQQIMSWFANKRAKIKKS		EKQIKTWFQNKRMKIKKS	EMQIARWFRNKRCKIKKS	EVQIAQWFANKRRKIKKS	ERQISQWFSNKRRKIKKS	ELQISRWFWNKRRKIKKS	EVQIAQWFSNKRRKIKKS	ELQIMYWFCNKRKKIKKS	EKQILQWFSNKRKKIKKS	EVQISNWFHNKRRKIKKS	EVQIRDWFSNKRKKIKKS	ERQIGYWFANKRAKIKKS	ESQITMWFSNKRRKIKKS	EGQIRRWFENKRRKIKKS	EPQIANWFSNKRRKIKKS	ESQIAYWFANKRKKIKKS	ERQISYWFQNKRKKIKKS		ERQIYYWFGNKRRKIKKS	ELQIARWFQNKRWKIKKS		ERQIQVWFWNKRWKIKKS	ERQIMHWFRNKRYKIKKS			EKQIIDWFRNKRFKIKKS	ERQINVWFKNKRWKIKKS	ELQIFRWFANKRYKIKKS		EKQIGKWFENKRGKIKKS	EAQIVKWFNNKRFKIKKS	EEQIQRWFGNKRYKIKKS	ETQIAKWFRNKRWKIKKS	ERQIQKWFMNKRWKIKKS	ESQIMTWFRNKRWKIKKS	EVQIQWWFWNKRRKIKKS	EEQIRVWFSNKRYKIKKS
>233.172.AAA	>233.104.AAC	>233.182.AAG	>233.115.AAT	>233.186.ACA	>233.110.ACC	>233.61.ACG	>233.80.ACT	>233.165.AGA	>233.151.AGC	>233.150.AGG	>233.179.AGT	>233.198.ATA		>233.142.ATG	>233.99.ATT	>233.80.CAA	>233.66.CAC	>233.261.CAG	>233.106.CAT	>233.121.CCA	>233.271.CCC	>233.152.CCG	>233.87.CCT	>233.221.CGA	>233.186.CGC	>233.34.CGG	>233.134.CGT	>233.175.CTA	>233.27.CTC		>233.86.CTT	>233.55.GAA		>233.45.GAG	>233.24.GAT			>233.27.GCG	>233.25.GCT	>233.55.GGA		>233.69.GGG	>233.73.GGT	>233.48.GTA	>233.26.GTC	>233.35.GTG	>233.76.GTT	>233.51.TAA	>233.65.TAC
ELQIHYWFVNKRWKIKKS	ETQIGSWFRNKRFKIKKS	EHQISQWFWNKRHKIKKS	ERQIMVWFNNKRFKIKKS	ERQIKNWFNNKRRKIKKS	EKQIATWFHNKRNKIKKS	EMQIKRWFENKRRKIKKS	ESQINSWFHNKRMKIKKS	EQQIFRWFANKRWKIKKS	ERQIKDWFRNKRFKIKKS	EYQILKWFENKRSKIKKS	ESQISRWFSNKRTKIKKS	EFQIKPWFVNKRLKIKKS		EGQISRWFGNKRTKIKKS	ERQIKVWFQNKRSKIKKS	ETQIATWFANKRRKIKKS	ERQILCWFSNKRRKIKKS	ERQICLWFANKRTKIKKS	EGQILQWFANKRRKIKKS	EKQITMWFQNKRKKIKKS	EEQIINWFSNKRKKIKKS	EVQIRDWFHNKRRKIKKS	ESQIRDWFSNKRKKIKKS	ELQIMYWFQNKRMKIKKS	ELQITNWFSNKRRKIKKS	EKQISRWFENKRRKIKKS	ESQITYWFSNKRRKIKKS	ELQIGYWFANKRKKIKKS	EIQINYWFSNKRKKIKKS		EHQIGYWFGNKRKKIKKS	EVQIMDWFKNKRYKIKKS		EGQISRWFWNKRYKIKKS	ERQIMLWFRNKRYKIKKS			EQQIGDWFRNKRFKIKKS	EHQISYWFKNKRYKIKKS	ERQILKWFQNKREKIKKS		EAQILKWFENKRRKIKKS	EKQIAKWFNNKRMKIKKS	ERQISRWFSNKRAKIKKS	EEQIMKWFRNKRWKIKKS	ELQIVRWFENKRFKIKKS	ERQIGAWFRNKRYKIKKS	ERQISTWFVNKRAKIKKS	EEQIRVWFSNKRAKIKKS
>234.171.AAA	>234.104.AAC	>234.180.AAG	>234.114.AAT	>234.184.ACA	>234.110.ACC	>234.61.ACG	>234.79.ACT	>234.165.AGA	>234.150.AGC	>234.150.AGG	>234.178.AGT	>234.198.ATA		>234.142.ATG	>234.99.ATT	>234.80.CAA	>234.66.CAC	>234.260.CAG	>234.106.CAT	>234.121.CCA	>234.270.CCC	>234.151.CCG	>234.87.CCT	>234.220.CGA	>234.184.CGC	>234.34.CGG	>234.132.CGT	>234.175.CTA	>234.27.CTC		>234.86.CTT	>234.55.GAA		>234.45.GAG	>234.24.GAT			>234.26.GCG	>234.25.GCT	>234.55.GGA		>234.69.GGG	>234.73.GGT	>234.48.GTA	>234.26.GTC	>234.35.GTG	>234.76.GTT	>234.51.TAA	>234.65.TAC
EKQIANWFSNKRFKIKKS	EKQITAWFRNKRFKIKKS	ERQILQWFWNKRYKIKKS	EHQIATWFNNKRFKIKKS	ESQIRNWFQNKRRKIKKS	EQQIAQWFSNKRKKIKKS	EFQIQRWFKNKRYKIKKS	EKQIKMWFENKRSKIKKS	EKQIRVWFQNKRWKIKKS	EIQIMRWFSNKRVKIKKS	ESQIFYWFKNKRIKIKKS	EAQIRKWFENKRWKIKKS	ELQIRWWFNNKRSKIKKS		ERQIIFWFQNKRSKIKKS	EVQIRIWFQNKRRKIKKS	ELQIMFWFQNKRRKIKKS	EKQINMWFSNKRRKIKKS	ETQIMYWFQNKRRKIKKS	EGQITNWFSNKRRKIKKS	ERQIGNWFSNKRKKIKKS	EMQIYNWFHNKRRKIKKS	ERQIVMWFENKRKKIKKS	EVQIMCWFSNKRKKIKKS	EKQIRYWFGNKRSKIKKS	EKQILAWFSNKRRKIKKS	EKQICMWFENKRRKIKKS	EVQIYYWFSNKRRKIKKS	ELQIMSWFANKRKKIKKS	EVQIRYWFANKRKKIKKS		ERQISFWFGNKRAKIKKS	EGQISHWFKNKRWKIKKS		EKQICTWFWNKRYKIKKS	EMQIAKWFVNKRWKIKKS			ELQIVDWFRNKRYKIKKS	EGQIQRWFKNKRFKIKKS	EVQIGKWFDNKRQKIKKS		ERQILKWFENKRWKIKKS	ERQIAKWFDNKRTKIKKS	EYQITRWFQNKRGKIKKS	EQQIMKWFRNKRWKIKKS	EMQIAKWFENKRWKIKKS	ELQITRWFGNKRYKIKKS	ERQITLWFRNKRSKIKKS	EMQIRVWFSNKRAKIKKS
>235.171.AAA	>235.104.AAC	>235.180.AAG	>235.114.AAT	>235.184.ACA	>235.108.ACC	>235.61.ACG	>235.79.ACT	>235.165.AGA	>235.149.AGC	>235.150.AGG	>235.178.AGT	>235.197.ATA		>235.141.ATG	>235.99.ATT	>235.80.CAA	>235.66.CAC	>235.259.CAG	>235.106.CAT	>235.119.CCA	>235.269.CCC	>235.151.CCG	>235.86.CCT	>235.216.CGA	>235.184.CGC	>235.34.CGG	>235.131.CGT	>235.174.CTA	>235.27.CTC		>235.85.CTT	>235.54.GAA		>235.44.GAG	>235.24.GAT			>235.26.GCG	>235.25.GCT	>235.54.GGA		>235.68.GGG	>235.73.GGT	>235.48.GTA	>235.26.GTC	>235.35.GTG	>235.76.GTT	>235.51.TAA	>235.65.TAC
EKQILCWFANKRHKIKKS	ERQITQWFRNKRFKIKKS	ELQISQWFWNKRFKIKKS	EGQISSWFSNKRHKIKKS	EKQIRDWFNNKRRKIKKS	ETQIMNWFHNKRTKIKKS	ERQIVYWFDNKRRKIKKS	ERQIASWFHNKRMKIKKS	EIQIKRWFTNKRYKIKKS	ELQIMRWFRNKRTKIKKS	EKQILKWFENKRSKIKKS	EVQIRKWFENKRHKIKKS	EKQIMSWFSNKRAKIKKS		EMQIMWWF_NKRVKIKKS	EYQIRVWFCNKRAKIKKS	EVQISCWFANKRRKIKKS	EGQISMWFRNKRRKIKKS	EKQIMTWFWNKRRKIKKS	EPQINNWFSNKRRKIKKS	EVQIATWFQNKRKKIKKS	EAQITTWFSNKRKKIKKS	EVQIVYWFENKRRKIKKS	EWQILRWFRNKRLKIKKS	ESQIFFWFANKRAKIKKS	ERQIAMWFSNKRRKIKKS	ERQITRWFENKRRKIKKS	EKQIANWFSNKRRKIKKS	ERQIFHWFCNKRKKIKKS	EVQILNWFSNKRKKIKKS		ERQIMYWFGNKRSKIKKS	EWQIMRWFQNKRWKIKKS		EQQILVWFSNKRYKIKKS	EAQIMHWFRNKRWKIKKS			EMQIYYWFKNKRAKIKKS	EVQISVWFKNKRFKIKKS	ELQISKWFDNKRYKIKKS		EKQIAKWFENKRVKIKKS	EGQISKWFDNKRWKIKKS	EYQILRWFQNKRVKIKKS	ETQIRRWFGNKRWKIKKS	EAQIMKWFENKRWKIKKS	EPQIARWFANKRQKIKKS	EKQIGRWFWNKRRKIKKS	EQQIIRWFINKRFKIKKS
>236.170.AAA	>236.103.AAC	>236.180.AAG	>236.113.AAT	>236.184.ACA	>236.106.ACC	>236.61.ACG	>236.78.ACT	>236.165.AGA	>236.147.AGC	>236.149.AGG	>236.178.AGT	>236.196.ATA		>236.140.ATG	>236.98.ATT	>236.79.CAA	>236.66.CAC	>236.257.CAG	>236.106.CAT	>236.119.CCA	>236.266.CCC	>236.151.CCG	>236.86.CCT	>236.216.CGA	>236.183.CGC	>236.34.CGG	>236.130.CGT	>236.174.CTA	>236.27.CTC		>236.85.CTT	>236.54.GAA		>236.44.GAG	>236.24.GAT			>236.26.GCG	>236.25.GCT	>236.54.GGA		>236.67.GGG	>236.73.GGT	>236.48.GTA	>236.25.GTC	>236.34.GTG	>236.76.GTT	>236.50.TAA	>236.64.TAC
EKQILSWFSNKRFKIKKS	ENQISSWFRNKRHKIKKS	ELQIRQWFWNKRFKIKKS	EKQICQWFNNKRFKIKKS	EAQINNWFNNKRRKIKKS	EVQITYWFENKRKKIKKS	EEQIRNWFENKRRKIKKS	EKQIGAWFHNKRMKIKKS	EAQIFRWFANKRHKIKKS	EYQIIRWFANKRWKIKKS	ESQIMKWFENKRWKIKKS	ERQIVKWFENKRWKIKKS	ERQISCWFSNKRAKIKKS		ECQIQYWFQNKRWKIKKS	EKQIAVWFMNKRAKIKKS	ELQIAYWFSNKRRKIKKS	EGQIAMWFRNKRRKIKKS	ETQISHWFWNKRRKIKKS	ELQIVMWFSNKRRKIKKS	EVQIATWFCNKRKKIKKS	ETQIMNWFHNKRKKIKKS	ELQIVYWFENKRRKIKKS	ESQISNWFANKRKKIKKS	EKQIFYWFANKRCKIKKS	ENQIKDWFSNKRRKIKKS	EVQILYWFENKRRKIKKS	ERQIVMWFSNKRRKIKKS	EVQISYWFANKRKKIKKS	ELQIVYWFSNKRKKIKKS		EAQIAWWFGNKRKKIKKS	EEQILRWFQNKRWKIKKS		ERQIVQWFWNKRYKIKKS	ERQIMVWFRNKRWKIKKS			EGQIGDWFRNKRYKIKKS	ERQIYVWFKNKRYKIKKS	EGQIGKWFDNKRYKIKKS		EFQILEWFENKRMKIKKS	ERQIAKWFSNKREKIKKS	EAQIVRWFQNKRGKIKKS	EKQIFSWFRNKRYKIKKS	EYQITRWFENKRYKIKKS	ELQIAKWFCNKRFKIKKS	ELQIQVWFANKRAKIKKS	EEQIRVWFSNKRVKIKKS
>237.169.AAA	>237.103.AAC	>237.179.AAG	>237.111.AAT	>237.183.ACA	>237.106.ACC	>237.60.ACG	>237.77.ACT	>237.163.AGA	>237.147.AGC	>237.148.AGG	>237.176.AGT	>237.196.ATA		>237.139.ATG	>237.98.ATT	>237.79.CAA	>237.65.CAC	>237.257.CAG	>237.105.CAT	>237.119.CCA	>237.262.CCC	>237.149.CCG	>237.86.CCT	>237.215.CGA	>237.182.CGC	>237.33.CGG	>237.130.CGT	>237.172.CTA	>237.27.CTC		>237.84.CTT	>237.54.GAA		>237.44.GAG	>237.24.GAT			>237.26.GCG	>237.25.GCT	>237.53.GGA		>237.67.GGG	>237.73.GGT	>237.48.GTA	>237.25.GTC	>237.34.GTG	>237.75.GTT	>237.50.TAA	>237.64.TAC
ERQIAQWFWNKRFKIKKS	ERQISDWFRNKRHKIKKS	ERQITQWFWNKRFKIKKS	EGQIACWFSNKRFKIKKS	EKQISMWFQNKRRKIKKS	EVQINWWFFNKRRKIKKS	EGQIVLWFCNKRAKIKKS	ELQIRYWFENKRKKIKKS	ENQIFRWFANKRHKIKKS	EDQIPWWFLNKR_KIKKS	EKQINKWFQNKRDKIKKS	EMQIRKWFENKRWKIKKS	EKQIMSWFANKRSKIKKS		EVQILSWFLNKRTKIKKS	ERQITIWFQNKRAKIKKS	ELQIAYWFANKRRKIKKS	EGQISMWFSNKRRKIKKS	E_QIMSWFGNKRFKIKKS	ETQIKDWFSNKRRKIKKS	ERQIQDWFSNKRKKIKKS	ETQIMCWFSNKRKKIKKS	ELQILNWFQNKRKKIKKS	EMQITNWFHNKRKKIKKS	EKQIKFWFQNKRKKIKKS	ECQIGYWFNNKRRKIKKS	ERQIARWFENKRRKIKKS	EQQIVNWFSNKRRKIKKS	EQQITYWFSNKRAKIKKS	ETQIRNWFSNKRKKIKKS		EKQIAYWFANKRVKIKKS	EMQIGRWFQNKRHKIKKS		EKQIKQWFWNKRWKIKKS	ERQISRWFLNKRYKIKKS			EKQILDWFRNKRRKIKKS	EVQINNWFRNKRFKIKKS	EKQIDKWFDNKRVKIKKS		ERQILKWFENKRRKIKKS	EGQILKWFNNKRFKIKKS	EVQIAKWFQNKRLKIKKS	EEQILKWFRNKRFKIKKS	ELQICTWFQNKRYKIKKS	EYQICNWFRNKRYKIKKS	EMQISIWFANKRAKIKKS	ETQIRLWFSNKRAKIKKS
>238.169.AAA	>238.103.AAC	>238.176.AAG	>238.111.AAT	>238.181.ACA	>238.105.ACC	>238.58.ACG	>238.76.ACT	>238.163.AGA	>238.147.AGC	>238.148.AGG	>238.173.AGT	>238.196.ATA		>238.139.ATG	>238.97.ATT	>238.79.CAA	>238.65.CAC	>238.256.CAG	>238.105.CAT	>238.119.CCA	>238.259.CCC	>238.148.CCG	>238.84.CCT	>238.215.CGA	>238.182.CGC	>238.33.CGG	>238.128.CGT	>238.172.CTA	>238.27.CTC		>238.83.CTT	>238.54.GAA		>238.44.GAG	>238.24.GAT			>238.26.GCG	>238.25.GCT	>238.53.GGA		>238.65.GGG	>238.72.GGT	>238.48.GTA	>238.25.GTC	>238.34.GTG	>238.75.GTT	>238.50.TAA	>238.64.TAC
EGQIMGWFANKRHKIKKS	EMQIGQWFRNKRFKIKKS	ERQIMQWFWNKRSKIKKS	ERQIATWFTNKRFKIKKS	ERQIQYWFWNKRRKIKKS	EVQIGRWFWNKRNKIKKS	ETQIL_WFHNKRLKIKKS	EWQISRWFKNKRFKIKKS	EAQIERWFVNKRFKIKKS	EFQIILWFHNKRMKIKKS	EKQILKWFENKRSKIKKS	EQQIRKWFENKRRKIKKS	ERQILTWFANKRVKIKKS		ERQISNWFMNKRTKIKKS	ETQIRVWFQNKRAKIKKS	EMQIFYWFANKRRKIKKS	ELQIACWFSNKRRKIKKS	EYQISCWFWNKRRKIKKS	EKQITDWFSNKRRKIKKS	EMQIHYWFANKRRKIKKS	ERQITMWFSNKRKKIKKS	ESQIVNWFQNKRKKIKKS	ERQISDWFSNKRKKIKKS	EMQIFHWFANKRSKIKKS	ERQITMWFNNKRRKIKKS	EVQIIHWFENKRRKIKKS	EIQIGNWFSNKRRKIKKS	EQQIHYWFSNKRKKIKKS	EVQITYWFSNKRKKIKKS		ETQIQNWFANKRRKIKKS	EGQIMRWFQNKRWKIKKS		EMQINRWFWNKRYKIKKS	ESQIGHWFRNKRYKIKKS			EYQILDWFRNKRYKIKKS	ELQILTWFRNKRYKIKKS	EKQIAKWFDNKRRKIKKS		EPQIAVWFLNKREKIKKS	EGQIGKWFSNKREKIKKS	EAQICRWFQNKRTKIKKS	EVQIRRWFGNKRAKIKKS	EGQIARWFENKRWKIKKS	ERQIRVWFANKRYKIKKS	EKQIAMWFANKRAKIKKS	ESQIRVWFSNKRAKIKKS
>239.169.AAA	>239.103.AAC	>239.176.AAG	>239.111.AAT	>239.180.ACA	>239.105.ACC	>239.58.ACG	>239.75.ACT	>239.163.AGA	>239.146.AGC	>239.147.AGG	>239.172.AGT	>239.194.ATA		>239.139.ATG	>239.96.ATT	>239.79.CAA	>239.65.CAC	>239.254.CAG	>239.105.CAT	>239.118.CCA	>239.258.CCC	>239.148.CCG	>239.84.CCT	>239.215.CGA	>239.181.CGC	>239.33.CGG	>239.128.CGT	>239.172.CTA	>239.27.CTC		>239.83.CTT	>239.54.GAA		>239.44.GAG	>239.24.GAT			>239.26.GCG	>239.25.GCT	>239.52.GGA		>239.65.GGG	>239.72.GGT	>239.48.GTA	>239.25.GTC	>239.34.GTG	>239.74.GTT	>239.49.TAA	>239.63.TAC
ESQISCWFINKRHKIKKS	EVQIMGWFRNKRHKIKKS	ESQIMQWFWNKRFKIKKS	EKQIGMWFTNKRHKIKKS	EIQIRNWFHNKRRKIKKS	EVQITSWFHNKRTKIKKS	ESQIRRWFENKRRKIKKS	EKQINNWFHNKRTKIKKS	ESQIRYWFGNKRHKIKKS	EQQIMRWFNNKRVKIKKS	ERQISKWFENKRTKIKKS	EMQIIKWFENKRYKIKKS	EGQIARWFANKRVKIKKS		EEQITCWFNNKRVKIKKS	ERQINTWFMNKRAKIKKS	ESQIHDWFVNKRRKIKKS	EQQIANWFSNKRRKIKKS	ETQIQYWFWNKRRKIKKS	EVQISNWFSNKRRKIKKS	ERQILDWFANKRKKIKKS	EKQIADWFHNKRKKIKKS	EKQIRDWFHNKRKKIKKS	ERQITDWFHNKRMKIKKS	EKQIHDWFSNKRRKIKKS	EEQIRMWFSNKRRKIKKS	EIQITYWFENKRRKIKKS	ETQIGNWFSNKRRKIKKS	ENQIAYWFSNKRKKIKKS	EWQISEWFANKRLKIKKS		EMQINNWFANKRRKIKKS	EGQIRRWFQNKRWKIKKS		EGQIARWFWNKRYKIKKS	EMQIGTWFRNKRWKIKKS			EAQINDWFRNKRYKIKKS	EEQIMDWFRNKRYKIKKS	EKQINKWFDNKRQKIKKS		EVQISKWFENKRRKIKKS	EGQILKWFSNKRWKIKKS	EFQITRWFQNKRAKIKKS	EWQIARWFRNKRFKIKKS	EMQIGKWFENKRFKIKKS	EGQIRAWFANKRFKIKKS	EEQIRVWFCNKRSKIKKS	EHQIRIWFSNKRVKIKKS
>240.168.AAA	>240.102.AAC	>240.175.AAG	>240.111.AAT	>240.179.ACA	>240.104.ACC	>240.56.ACG	>240.75.ACT	>240.162.AGA	>240.146.AGC	>240.146.AGG	>240.172.AGT	>240.194.ATA		>240.138.ATG	>240.96.ATT	>240.79.CAA	>240.65.CAC	>240.253.CAG	>240.105.CAT	>240.117.CCA	>240.258.CCC	>240.148.CCG	>240.83.CCT	>240.213.CGA	>240.179.CGC	>240.33.CGG	>240.127.CGT	>240.171.CTA	>240.27.CTC		>240.82.CTT	>240.54.GAA		>240.43.GAG	>240.24.GAT			>240.26.GCG	>240.25.GCT	>240.52.GGA		>240.64.GGG	>240.72.GGT	>240.48.GTA	>240.25.GTC	>240.33.GTG	>240.74.GTT	>240.48.TAA	>240.63.TAC
EAQIRMWFVNKRHKIKKS	EEQIRSWFSNKRFKIKKS	ERQIQQWFWNKRYKIKKS	EKQIAQWFANKRFKIKKS	ETQISHWFWNKRRKIKKS	EQQIRYWFENKRKKIKKS	ESQIRDWFENKRRKIKKS	EIQIRGWFTNKRSKIKKS	ESQIFRWFANKRCKIKKS	ERQIGYWFSNKRVKIKKS	EDQIVSWFCNKRFKIKKS	EKQITKWFENKRYKIKKS	EKQIYYWFCNKRVKIKKS		ETQIEVWFTNKRHKIKKS	EKQIVVWFQNKRAKIKKS	EKQIAGWFANKRRKIKKS	EEQIHNWFSNKRRKIKKS	ERQIRYWFWNKRRKIKKS	EKQIAGWFSNKRRKIKKS	EYQITTWFANKRKKIKKS	EMQIMMWFSNKRKKIKKS	EKQITNWFHNKRKKIKKS	ESQIMNWFANKRKKIKKS	ERQIFLWFSNKRRKIKKS	EQQIRMWFSNKRRKIKKS	ERQIRLWFENKRRKIKKS	EKQIVYWFGNKRQKIKKS	EPQIMYWFANKRRKIKKS	ESQIGNWFKNKRKKIKKS		ETQILMWFANKRKKIKKS	ESQIMRWFQNKRWKIKKS		ELQIATWFVNKRYKIKKS	EWQIGRWFLNKRYKIKKS			ERQIHTWFKNKRFKIKKS	EVQIGVWFKNKRYKIKKS	ERQIMKWFDNKRAKIKKS		EMQILKWFENKRRKIKKS	EEQIMKWFDNKRQKIKKS	EAQIIRWFQNKRCKIKKS	RAADRVGFGNKRKKIKKS	EQQILKWFENKRHKIKKS	EHQISRWFSNKRFKIKKS	ERQITVWFANKRAKIKKS	EKQIRLWFSNKRYKIKKS
>241.166.AAA	>241.102.AAC	>241.174.AAG	>241.110.AAT	>241.179.ACA	>241.103.ACC	>241.56.ACG	>241.74.ACT	>241.161.AGA	>241.146.AGC	>241.145.AGG	>241.172.AGT	>241.193.ATA		>241.137.ATG	>241.95.ATT	>241.79.CAA	>241.65.CAC	>241.252.CAG	>241.105.CAT	>241.117.CCA	>241.257.CCC	>241.148.CCG	>241.82.CCT	>241.213.CGA	>241.178.CGC	>241.33.CGG	>241.127.CGT	>241.171.CTA	>241.27.CTC		>241.82.CTT	>241.54.GAA		>241.43.GAG	>241.24.GAT			>241.26.GCG	>241.25.GCT	>241.51.GGA		>241.63.GGG	>241.72.GGT	>241.48.GTA	>241.25.GTC	>241.33.GTG	>241.74.GTT	>241.48.TAA	>241.63.TAC
ERQIGYWFVNKRHKIKKS	ERQISSWFRNKRHKIKKS	ENQIKQWFWNKRFKIKKS	ERQISTWFTNKRFKIKKS	EKQIVAWFHNKRTKIKKS	ERQIKHWFENKRKKIKKS	E_QIFEWFSNKRWKIKKS	ETQIVNWFHNKRTKIKKS	ESQIFRWFANKRWKIKKS	EKQIAYWFSNKRVKIKKS	ERQILKWFENKRGKIKKS	EGQISKWFENKRYKIKKS	EKQIQVWFYNKRSKIKKS		EVQILYWFQNKRHKIKKS	ERQIYVWFQNKRSKIKKS	EQQIFHWFANKRRKIKKS	EVQIRQWFSNKRRKIKKS	EMQISWWFWNKRRKIKKS	ETQISQWFSNKRRKIKKS	EQQILQWFANKRRKIKKS	EGQIRDWFSNKRKKIKKS	ERQIKDWFQNKRKKIKKS	EAQIQNWFSNKRKKIKKS	EKQIGNWFANKRAKIKKS	EVQIRYWFGNKRRKIKKS	ELQIGRWFENKRRKIKKS	EVQISDWFSNKRRKIKKS	EVQISYWFANKRRKIKKS	ERQIGFWFSNKRRKIKKS		EYQIVYWFGNKRNKIKKS	EIQIVRWFQNKRWKIKKS		ELQISTWFSNKRFKIKKS	EGQIARWFVNKRYKIKKS			EMQIADWFRNKRYKIKKS	EMQIVDWFRNKRFKIKKS	EKQISKWFDNKRQKIKKS		ESQISKWFENKRLKIKKS	ERQISKWFSNKREKIKKS	EWQIRRWFENKRYKIKKS	EQQISKWFGNKRAKIKKS	EYQIARWFENKRYKIKKS	EVQICRWFANKRFKIKKS	EVQIAVWFCNKRAKIKKS	EEQIRIWFSNKRVKIKKS
>242.166.AAA	>242.102.AAC	>242.173.AAG	>242.110.AAT	>242.178.ACA	>242.103.ACC	>242.56.ACG	>242.74.ACT	>242.161.AGA	>242.145.AGC	>242.143.AGG	>242.171.AGT	>242.193.ATA		>242.136.ATG	>242.94.ATT	>242.79.CAA	>242.64.CAC	>242.251.CAG	>242.105.CAT	>242.117.CCA	>242.256.CCC	>242.148.CCG	>242.82.CCT	>242.213.CGA	>242.178.CGC	>242.33.CGG	>242.126.CGT	>242.170.CTA	>242.27.CTC		>242.81.CTT	>242.54.GAA		>242.42.GAG	>242.24.GAT			>242.26.GCG	>242.25.GCT	>242.49.GGA		>242.62.GGG	>242.72.GGT	>242.48.GTA	>242.25.GTC	>242.33.GTG	>242.74.GTT	>242.48.TAA	>242.63.TAC
EMQIWRWFANKRFKIKKS	EPQISSWFRNKRCKIKKS	ESQISSWFWNKRFKIKKS	EKQIATWFSNKRHKIKKS	EWQIKTWFKNKRYKIKKS	ESQISSWFHNKRMKIKKS	ETQIPPWFLNKRMKIKKS	ETQIGEWFANKRVKIKKS	EKQIMQWFQNKRHKIKKS	EPQIRDWFRNKRMKIKKS	ERQIRKWFENKRTKIKKS	EAQIKKWFENKRAKIKKS	EVQILPWFSNKREKIKKS		EKQILYWFQNKRTKIKKS	ERQIVVWFQNKRSKIKKS	EVQIAYWFANKRRKIKKS	EGQIRQWFSNKRRKIKKS	EDQIGMWFSNKRRKIKKS	EAQISNWFSNKRRKIKKS	EKQILTWFANKRKKIKKS	ELQIYNWFHNKRKKIKKS	EVQIVYWFENKRRKIKKS	EMQIANWFGNKRKKIKKS	ENQIFNWFANKRKKIKKS	ETQILYWFSNKRRKIKKS	ESQIMRWFENKRRKIKKS	ETQICYWFSNKRRKIKKS	ETQIMHWFANKRKKIKKS	EMQITYWFQNKRKKIKKS		EKQIAWWFGNKRQKIKKS	EVQIERWFQNKRYKIKKS		ELQINRWFWNKRWKIKKS	EIQIMVWFRNKRYKIKKS			ELQISKWFANKRIKIKKS	EHQIGDWFRNKRYKIKKS	EKQISKWFDNKRLKIKKS		EKQIVKWFENKRQKIKKS	EGQIAKWFNNKRSKIKKS	ERQIYRWFQNKRAKIKKS	ERQIMRWFGNKRFKIKKS	EKQIARWFENKRAKIKKS	EMQIMKWFSNKRWKIKKS	ERQIATWFSNKRAKIKKS	EHQIRVWFSNKRAKIKKS
>243.166.AAA	>243.102.AAC	>243.172.AAG	>243.109.AAT	>243.178.ACA	>243.102.ACC	>243.55.ACG	>243.74.ACT	>243.160.AGA	>243.144.AGC	>243.143.AGG	>243.170.AGT	>243.192.ATA		>243.136.ATG	>243.93.ATT	>243.78.CAA	>243.64.CAC	>243.245.CAG	>243.105.CAT	>243.116.CCA	>243.255.CCC	>243.146.CCG	>243.82.CCT	>243.212.CGA	>243.176.CGC	>243.32.CGG	>243.122.CGT	>243.169.CTA	>243.27.CTC		>243.80.CTT	>243.54.GAA		>243.42.GAG	>243.24.GAT			>243.26.GCG	>243.25.GCT	>243.49.GGA		>243.61.GGG	>243.71.GGT	>243.48.GTA	>243.25.GTC	>243.32.GTG	>243.72.GTT	>243.47.TAA	>243.63.TAC
EKQIYYWFNNKRHKIKKS	EGQISSWFRNKRFKIKKS	ERQINQWFWNKRWKIKKS	EVQIRGWFGNKRRKIKKS	EEQIDLWFPNKRNKIKKS	ESQIKHWFENKRKKIKKS	EWQIRTWFKNKRYKIKKS	EVQIKWWFENKRKKIKKS	ETQIKSWFNNKRWKIKKS	ELQIRYWFSNKRTKIKKS	EFQIDMWFLNKRRKIKKS	EGQIRKWFENKRWKIKKS	EKQIHAWFANKRTKIKKS		ESQIVYWFQNKRAKIKKS	EKQIKLWFQNKRAKIKKS	ELQISYWFQNKRRKIKKS	ERQIADWFRNKRRKIKKS	EEQIIIWFQNKRRKIKKS	EPQIVYWFSNKRRKIKKS	EAQIMTWFQNKRKKIKKS	EVQIVNWFSNKRKKIKKS	ESQIRDWFQNKRKKIKKS	EKQIANWFANKRKKIKKS	ELQIHNWFCNKRRKIKKS	ERQIHYWFSNKRRKIKKS	EKQITRWFENKRRKIKKS	ERQISNWFSNKRRKIKKS	ELQIAYWFSNKRKKIKKS	ERQILCWFSNKRRKIKKS		EVQIGNWFTNKRKKIKKS	EEQIFHWFKNKRSKIKKS		EGQIQRWFWNKRYKIKKS	EGQIYNWFRNKRWKIKKS			ETQIGDWFRNKRYKIKKS	ESQIARWFKNKRYKIKKS	ESQIMKWFDNKRWKIKKS		ETQISKWFENKRWKIKKS	ERQIAKWFNNKRLKIKKS	EKQIARWFENKRWKIKKS	EYQISRWFGNKRSKIKKS	ETQIARWFENKRYKIKKS	ELQIAVWFRNKRYKIKKS	EKQIAIWFNNKRAKIKKS	ERQIRLWFSNKRAKIKKS
>244.165.AAA	>244.102.AAC	>244.172.AAG	>244.109.AAT	>244.178.ACA	>244.101.ACC	>244.55.ACG	>244.74.ACT	>244.160.AGA	>244.143.AGC	>244.143.AGG	>244.169.AGT	>244.192.ATA		>244.136.ATG	>244.92.ATT	>244.78.CAA	>244.64.CAC	>244.245.CAG	>244.104.CAT	>244.116.CCA	>244.255.CCC	>244.146.CCG	>244.82.CCT	>244.212.CGA	>244.175.CGC	>244.32.CGG	>244.120.CGT	>244.166.CTA	>244.26.CTC		>244.79.CTT	>244.53.GAA		>244.41.GAG	>244.24.GAT			>244.26.GCG	>244.25.GCT	>244.48.GGA		>244.60.GGG	>244.71.GGT	>244.47.GTA	>244.25.GTC	>244.32.GTG	>244.72.GTT	>244.47.TAA	>244.63.TAC
ERQIMYWFVNKRHKIKKS	EGQIGSWFRNKRFKIKKS	EGQIMQWFWNKRWKIKKS	ERQIASWFSNKRHKIKKS	EKQIVMWFQNKRRKIKKS	EKQIMGWFSNKRKKIKKS	EVQIVHWFENKRRKIKKS	ERQISSWFHNKRMKIKKS	ENQIFRWFANKRWKIKKS	EMQIARWFNNKRVKIKKS	EQQIRKWFENKRAKIKKS	ELQIRKWFENKRWKIKKS	EKQISSWFANKRTKIKKS		ERQIKVWFQNKRDKIKKS	EKQISIWFQNKRRKIKKS	EMQIMHWFQNKRRKIKKS	EGQISMWFRNKRRKIKKS	RGRSRSGSRTKRSKIKKS	ESQITQWFSNKRRKIKKS	EVQINNWFANKRKKIKKS	ELQIRDWFHNKRKKIKKS	ERQIVYWFENKRRKIKKS	ESQISNWFGNKRKKIKKS	EPQIFHWFANKRRKIKKS	EVQISRWFSNKRRKIKKS	EKQIIWWFENKRRKIKKS	ERQISMWFGNKRRKIKKS	EKQIHFWFCNKRKKIKKS	EMQILNWFSNKRKKIKKS		EKQITHWFGNKRKKIKKS	ERQIDRWFSNKRWKIKKS		EMQINRWFWNKRYKIKKS	ETQITRWFVNKRYKIKKS			ERQIADWFRNKRQKIKKS	EMQISNWFRNKRFKIKKS	EKQIGKWFDNKRFKIKKS		EGQIMKWFENKRSKIKKS	EKQILKWFNNKRCKIKKS	ETQICKWFANKRMKIKKS	ESQIMKWFRNKRWKIKKS	EWQIARWFENKRYKIKKS	EVQIVVWFRNKRYKIKKS	EKQISTWFVNKRVKIKKS	ESQIRVWFSNKRAKIKKS
>245.164.AAA	>245.102.AAC	>245.171.AAG	>245.108.AAT	>245.178.ACA	>245.101.ACC	>245.54.ACG	>245.73.ACT	>245.160.AGA	>245.142.AGC	>245.143.AGG	>245.167.AGT	>245.192.ATA		>245.135.ATG	>245.92.ATT	>245.78.CAA	>245.64.CAC	>245.244.CAG	>245.104.CAT	>245.116.CCA	>245.255.CCC	>245.146.CCG	>245.82.CCT	>245.211.CGA	>245.175.CGC	>245.32.CGG	>245.118.CGT	>245.165.CTA	>245.26.CTC		>245.79.CTT	>245.53.GAA		>245.41.GAG	>245.24.GAT			>245.26.GCG	>245.25.GCT	>245.48.GGA		>245.60.GGG	>245.71.GGT	>245.47.GTA	>245.25.GTC	>245.32.GTG	>245.72.GTT	>245.47.TAA	>245.63.TAC
EKQIYYWFVNKRSKIKKS	EQQISAWFRNKRFKIKKS	EHQITQWFWNKRHKIKKS	EKQIGAWFSNKRFKIKKS	ETQIKNWFQNKRVKIKKS	ETQIMNWFHNKRTKIKKS	EEQIRNWFENKRRKIKKS	EKQIKGWFSNKRYKIKKS	ETQIFRWFANKRHKIKKS	ESQIRRWFSNKRVKIKKS	ERQINKWFENKRRKIKKS	ESQISKWFENKRYKIKKS	EKQIYYWFANKRQKIKKS		ERQISNWFMNKRHKIKKS	EVQIKVWFQNKRSKIKKS	EQQIMNWFVNKRRKIKKS	ELQIAMWFSNKRRKIKKS	EFQITMWFRNKRNKIKKS	ELQIAGWFSNKRRKIKKS	ERQILDWFANKRKKIKKS	ELQILTWFSNKRKKIKKS	EVQISNWFQNKRKKIKKS	EVQIMNWFSNKRKKIKKS	ERQIHYWFANKRAKIKKS	ERQIGYWFSNKRQKIKKS	EQQIRRWFENKRRKIKKS	EVQIGYWFSNKRRKIKKS	ETQIAMWFSNKRRKIKKS	ELQIGYWFSNKRKKIKKS		ETQIGNWFSNKRRKIKKS	EGQIKRWFQNKRWKIKKS		EQQITRWFWNKRYKIKKS	ERQIMVWFSNKRYKIKKS			EWQIREWFKNKRGKIKKS	ECQIRAWFKNKRYKIKKS	ERQISKWFDNKRSKIKKS		EKQISKWFENKRMKIKKS	EKQIMKWFGNKRMKIKKS	ETQIKKWFQNKRSKIKKS	EFQIIKWFSNKRFKIKKS	EGQIGRWFENKRAKIKKS	ESQIVKWFSNKRGKIKKS	ERQIIIWFANKRYKIKKS	ETQIRVWFSNKRAKIKKS
>246.164.AAA	>246.102.AAC	>246.171.AAG	>246.108.AAT	>246.177.ACA	>246.101.ACC	>246.54.ACG	>246.73.ACT	>246.159.AGA	>246.140.AGC	>246.143.AGG	>246.167.AGT	>246.191.ATA		>246.135.ATG	>246.91.ATT	>246.77.CAA	>246.64.CAC	>246.242.CAG	>246.104.CAT	>246.115.CCA	>246.254.CCC	>246.144.CCG	>246.81.CCT	>246.211.CGA	>246.174.CGC	>246.31.CGG	>246.118.CGT	>246.165.CTA	>246.26.CTC		>246.78.CTT	>246.53.GAA		>246.41.GAG	>246.24.GAT			>246.26.GCG	>246.25.GCT	>246.48.GGA		>246.59.GGG	>246.71.GGT	>246.47.GTA	>246.25.GTC	>246.32.GTG	>246.71.GTT	>246.47.TAA	>246.63.TAC
EKQIVTWFANKRHKIKKS	ESQIASWFRNKRFKIKKS	ELQITQWFWNKRHKIKKS	EKQIQVWFSNKRFKIKKS	ELQIYNWFNNKRRKIKKS	EGQIGRWFGNKRTKIKKS	EVQIRYWFENKRRKIKKS	ERQISAWFHNKRMKIKKS	ESQIFRWFANKRWKIKKS	ELQILFWFFNKRAKIKKS	EPQIRKWFENKRRKIKKS	EKQIKKWFENKRRKIKKS	EKQIKAWFANKRVKIKKS		ERQILYWFQNKRTKIKKS	ERQIVIWFQNKRGKIKKS	ESQIATWFANKRRKIKKS	ELQIAYWFSNKRRKIKKS	EKQINHWFWNKRRKIKKS	EKQILNWFSNKRRKIKKS	ELQISNWFCNKRKKIKKS	ELQIVTWFSNKRKKIKKS	ETQIRDWFQNKRNKIKKS	ERQIMQWFANKRKKIKKS	ERQIFNWFSNKRRKIKKS	ERQITSWFSNKRRKIKKS	EAQISHWFENKRRKIKKS	EKQIVDWFSNKRRKIKKS	ERQIATWFANKRRKIKKS	EQQIYWWFQNKRRKIKKS		EWQIRYWFGNKRRKIKKS	EQQICRWFQNKRHKIKKS		ELQIQRWFWNKRYKIKKS	ELQISIWFRNKRYKIKKS			ERQICDWFRNKRRKIKKS	ELQIMGWFRNKRYKIKKS	E_QIHSWFNNKRFKIKKS		ERQIRKWFENKRRKIKKS	ESQISKWFNNKRVKIKKS	ETQIVKWFQNKRAKIKKS	ETQIRRWFGNKRAKIKKS	EPQIDKWFQNKRYKIKKS	EAQINKWFLNKRYKIKKS	EAQILKWFGNKRRKIKKS	EKQIRLWFSNKRVKIKKS
>247.164.AAA	>247.102.AAC	>247.170.AAG	>247.107.AAT	>247.177.ACA	>247.101.ACC	>247.53.ACG	>247.73.ACT	>247.157.AGA	>247.139.AGC	>247.141.AGG	>247.167.AGT	>247.191.ATA		>247.134.ATG	>247.91.ATT	>247.77.CAA	>247.64.CAC	>247.239.CAG	>247.104.CAT	>247.115.CCA	>247.254.CCC	>247.144.CCG	>247.81.CCT	>247.208.CGA	>247.173.CGC	>247.31.CGG	>247.117.CGT	>247.164.CTA	>247.26.CTC		>247.77.CTT	>247.53.GAA		>247.41.GAG	>247.24.GAT			>247.25.GCG	>247.25.GCT	>247.48.GGA		>247.59.GGG	>247.71.GGT	>247.47.GTA	>247.24.GTC	>247.32.GTG	>247.71.GTT	>247.47.TAA	>247.61.TAC
ELQIQTWFANKRHKIKKS	ERQIGDWFRNKRFKIKKS	ELQIQQWFWNKRYKIKKS	ERQIMAWFSNKRHKIKKS	ELQIQNWFNNKRRKIKKS	ELQIRYWFENKRKKIKKS	ESQIRRWFENKRRKIKKS	EKQIVGWFHNKRMKIKKS	ECQIMRWFWNKRYKIKKS	ERQIMRWFNNKRVKIKKS	EGQIVKWFENKRYKIKKS	ERQIAKWFENKRWKIKKS	EKQILSWFSNKRAKIKKS		ENQINYWFSNKRQKIKKS	EGQIRVWFQNKRNKIKKS	ETQIMYWFQNKRSKIKKS	EAQIKCWFSNKRRKIKKS	ERQISNWFWNKRRKIKKS	ETQIADWFANKRRKIKKS	EVQIKYWFQNKRKKIKKS	ETQILNWFSNKRKKIKKS	EKQITYWFENKRRKIKKS	ERQIMDWFSNKRKKIKKS	EVQIMYWFQNKRQKIKKS	EVQIQRWFSNKRRKIKKS	ERQITYWFENKRRKIKKS	EQQIMYWFGNKRRKIKKS	ESQIFFWFANKRKKIKKS	EGQIMNWFRNKRKKIKKS		ERQIAFWFGNKRKKIKKS	EKQIQRWFQNKRWKIKKS		EIQIVRWFWNKRYKIKKS	ESQISRWFLNKRYKIKKS			ELQIMVWFKNKRYKIKKS	EGQISDWFRNKRYKIKKS	ERQIMKWFDNKRVKIKKS		ERQITKWFENKRGKIKKS	EKQIMKWFNNKRVKIKKS	EKQIFDWFKNKRFKIKKS	EQQIARWFGNKRFKIKKS	ERQIARWFENKRYKIKKS	ELQIAVWFRNKRFKIKKS	ECQIRVWFANKRAKIKKS	EVQICRWFINKRAKIKKS
>248.163.AAA	>248.101.AAC	>248.169.AAG	>248.107.AAT	>248.175.ACA	>248.100.ACC	>248.52.ACG	>248.73.ACT	>248.157.AGA	>248.136.AGC	>248.141.AGG	>248.166.AGT	>248.190.ATA		>248.132.ATG	>248.91.ATT	>248.77.CAA	>248.64.CAC	>248.239.CAG	>248.104.CAT	>248.115.CCA	>248.253.CCC	>248.143.CCG	>248.80.CCT	>248.208.CGA	>248.171.CGC	>248.31.CGG	>248.116.CGT	>248.164.CTA	>248.26.CTC		>248.77.CTT	>248.53.GAA		>248.40.GAG	>248.24.GAT			>248.25.GCG	>248.25.GCT	>248.47.GGA		>248.58.GGG	>248.71.GGT	>248.47.GTA	>248.24.GTC	>248.32.GTG	>248.71.GTT	>248.46.TAA	>248.61.TAC
EKQILTWFQNKRFKIKKS	EQQISSWFRNKRHKIKKS	ERQIRQWFWNKRFKIKKS	ERQINSWFSNKRFKIKKS	EMQIYNWFNNKRRKIKKS	ERQIQYWFHNKREKIKKS	ERQIKLWFENKRRKIKKS	EKQIAAWFHNKRTKIKKS	ERQIMQWFWNKRFKIKKS	EQQIRLWFRNKRLKIKKS	EKQIAKWFENKRVKIKKS	EKQINKWFQNKRWKIKKS	EKQIRTWFANKRVKIKKS		ERQISTWFMNKRQKIKKS	EKQIKLWFQNKRMKIKKS	EEQIAYWFANKRRKIKKS	ELQICMWFRNKRRKIKKS	ENQISWWFWNKRRKIKKS	EGQIMNWFSNKRRKIKKS	EAQIANWFSNKRKKIKKS	EVQIATWFSNKRKKIKKS	ERQIINWFQNKRKKIKKS	ERQITNWFSNKRSKIKKS	ESQIFYWFANKRSKIKKS	ECQIMNWFSNKRRKIKKS	ERQIALWFENKRRKIKKS	EKQIKYWFGNKRAKIKKS	EVQIQYWFCNKRAKIKKS	EQQIYYWFSNKRRKIKKS		EKQIIFWFSNKRRKIKKS	EYQISRWFQNKRFKIKKS		EGQINWWFRNKRLKIKKS	EIQIQHWFRNKRYKIKKS			EGQILTWFKNKRYKIKKS	ERQIMDWFRNKRFKIKKS	EKQIHKWFDNKRRKIKKS		EMQISKWFENKRRKIKKS	ESQISKWFDNKRQKIKKS	EMQIARWFQNKRGKIKKS	ESQILKWFRNKRFKIKKS	ERQITRWFENKRYKIKKS	ETQISRWFGNKRWKIKKS	ERQIMTWFVNKRAKIKKS	ESQIRIWFSNKRAKIKKS
>249.162.AAA	>249.101.AAC	>249.167.AAG	>249.106.AAT	>249.174.ACA	>249.99.ACC	>249.52.ACG	>249.73.ACT	>249.157.AGA	>249.136.AGC	>249.139.AGG	>249.165.AGT	>249.189.ATA		>249.132.ATG	>249.88.ATT	>249.77.CAA	>249.64.CAC	>249.236.CAG	>249.104.CAT	>249.114.CCA	>249.250.CCC	>249.142.CCG	>249.80.CCT	>249.207.CGA	>249.170.CGC	>249.31.CGG	>249.116.CGT	>249.163.CTA	>249.26.CTC		>249.77.CTT	>249.52.GAA		>249.40.GAG	>249.24.GAT			>249.25.GCG	>249.25.GCT	>249.47.GGA		>249.58.GGG	>249.71.GGT	>249.47.GTA	>249.24.GTC	>249.32.GTG	>249.71.GTT	>249.45.TAA	>249.61.TAC
EKQIAGWFANKRHKIKKS	ECQISSWFRNKRHKIKKS	ELQIMQWFWNKRFKIKKS	ESQIMCWFSNKRFKIKKS	EKQIKDWFNNKRRKIKKS	ESQILSWFKNKRTKIKKS	EKQIRYWFENKRRKIKKS	ERQILTWFHNKRMKIKKS	EVQIFYWFANKRSKIKKS	ELQIRDWFRNKRMKIKKS	EEQIAKWFENKRYKIKKS	ERQIRSWFQNKRYKIKKS	EKQIQSWFCNKRSKIKKS		ELQIVYWFQNKRWKIKKS	ETQIRVWFQNKRSKIKKS	EKQIMYWFQNKRRKIKKS	EIQIADWFRNKRRKIKKS	EAQISNWFWNKRRKIKKS	EGQITNWFGNKRRKIKKS	ETQIRMWFQNKRKKIKKS	ETQIRDWFSNKRKKIKKS	ERQICDWFQNKRKKIKKS	EIQIVNWFSNKRKKIKKS	EIQIFYWFSNKRQKIKKS	EKQILTWFNNKRRKIKKS	ERQIATWFENKRRKIKKS	EKQIATWFNNKRRKIKKS	ELQIRYWFSNKRKKIKKS	ETQIRDWFQNKRKKIKKS		ERQISGWFSNKRRKIKKS	ERQIENWFKNKRWKIKKS		EKQIMTWFWNKRYKIKKS	EQQIGRWFLNKRYKIKKS			ELQIRLWFKNKRYKIKKS	ERQIKDWFRNKRFKIKKS	ERQILKWFDNKRVKIKKS		EQQIAKWFENKRRKIKKS	EGQILKWFSNKREKIKKS	ERQIVRWFENKRWKIKKS	EVQILLWFHNKRLKIKKS	ESQILRWFENKRWKIKKS	EPQITKWFANKRCKIKKS	ERQITIWFRNKRAKIKKS	ESQIRIWFSNKRAKIKKS
>250.160.AAA	>250.101.AAC	>250.167.AAG	>250.105.AAT	>250.172.ACA	>250.99.ACC	>250.51.ACG	>250.72.ACT	>250.157.AGA	>250.135.AGC	>250.138.AGG	>250.165.AGT	>250.189.ATA		>250.132.ATG	>250.87.ATT	>250.77.CAA	>250.64.CAC	>250.236.CAG	>250.104.CAT	>250.114.CCA	>250.249.CCC	>250.142.CCG	>250.80.CCT	>250.207.CGA	>250.170.CGC	>250.31.CGG	>250.115.CGT	>250.163.CTA	>250.26.CTC		>250.76.CTT	>250.52.GAA		>250.40.GAG	>250.24.GAT			>250.25.GCG	>250.25.GCT	>250.47.GGA		>250.57.GGG	>250.70.GGT	>250.47.GTA	>250.24.GTC	>250.32.GTG	>250.70.GTT	>250.45.TAA	>250.61.TAC
ERQIHHWFVNKRWKIKKS	ETQISAWFRNKRHKIKKS	ESQISSWFWNKRYKIKKS	EKQIVTWFSNKRHKIKKS	EHQIKNWFNNKRRKIKKS	EGQIRAWFKNKRPKIKKS	ERQIRYWFENKRRKIKKS	ERQILSWFHNKRMKIKKS	ERQIRRWFENKRWKIKKS	ERQICMWFANKRAKIKKS	EKQIKQWFHNKRRKIKKS	EEQIKKWFENKRFKIKKS	ERQILSWFANKRMKIKKS		ERQITAWFQNKRNKIKKS	ERQITVWFQNKRIKIKKS	EPQIANWFANKRRKIKKS	EKQIEDWFKNKRRKIKKS	ESQISHWFWNKRRKIKKS	ECQIVQWFSNKRRKIKKS	ELQITYWFQNKRRKIKKS	ETQIVNWFSNKRKKIKKS	ECQIRDWFQNKRKKIKKS	EVQIMNWFANKRKKIKKS	EEQIHHWFANKRRKIKKS	ECQIRDWFSNKRRKIKKS	ERQIMFWFENKRRKIKKS	EWQIELWFYNKRVKIKKS	EQQISMWFANKRKKIKKS	ETQIRNWFANKRKKIKKS		EKQIYYWFSNKRRKIKKS	EEQICRWFQNKRHKIKKS		EHQIRQWFWNKRYKIKKS	EVQIIRWFCNKRYKIKKS			ERQIGDWFRNKRFKIKKS	ERQITDWFRNKRFKIKKS	PERAAEWFHNKRSKIKKS		EAQIVKWFENKRRKIKKS	ECQIAKWFDNKRMKIKKS	EFQILRWFQNKRFKIKKS	EQQIDKWFRNKRYKIKKS	EAQIARWFENKRYKIKKS	EKQIMKWFANKRLKIKKS	ERQIATWFVNKRSKIKKS	ENQIRVWFSNKRAKIKKS
>251.159.AAA	>251.101.AAC	>251.167.AAG	>251.105.AAT	>251.171.ACA	>251.99.ACC	>251.51.ACG	>251.71.ACT	>251.156.AGA	>251.135.AGC	>251.137.AGG	>251.165.AGT	>251.189.ATA		>251.132.ATG	>251.87.ATT	>251.77.CAA	>251.63.CAC	>251.236.CAG	>251.104.CAT	>251.112.CCA	>251.249.CCC	>251.142.CCG	>251.79.CCT	>251.206.CGA	>251.167.CGC	>251.30.CGG	>251.115.CGT	>251.161.CTA	>251.26.CTC		>251.76.CTT	>251.52.GAA		>251.40.GAG	>251.23.GAT			>251.25.GCG	>251.25.GCT	>251.46.GGA		>251.57.GGG	>251.70.GGT	>251.47.GTA	>251.24.GTC	>251.32.GTG	>251.70.GTT	>251.44.TAA	>251.61.TAC
EHQISQWFANKRFKIKKS	ERQISSWFRNKRFKIKKS	ERQIMQWFWNKRHKIKKS	ETQIASWFANKRFKIKKS	ERQIANWFNNKRRKIKKS	ETQIVNWFNNKRKKIKKS	EKQIMTWFQNKRTKIKKS	ERQIMCWFHNKRTKIKKS	EDQISSWFDNKRLKMKKS	ELQIRWWFVNKRYKIKKS	EYQIAKWFQNKRSKIKKS	ERQILRWFENKRYKIKKS	EQQIMVWFCNKRYKIKKS		EAQILAWFQNKRSKIKKS	ERQIRVWFQNKRQKIKKS	EQQIADWFSNKRRKIKKS	EAQIRMWFSNKRRKIKKS	EKQIAHWFWNKRRKIKKS	EAQIMNWFGNKRRKIKKS	ERQILDWFANKRKKIKKS	ELQIGNWFSNKRKKIKKS	EVQILNWFANKRKKIKKS	ERQIMTWFSNKRKKIKKS	EAQIFNWFANKRKKIKKS	ERQITHWFSNKRVKIKKS	ESQITRWFENKRRKIKKS	EKQIVYWFDNKRRKIKKS	EPQITFWFANKRKKIKKS	NEVQIRYWFSNKRKIKKS		EVQITNWFSNKRKKIKKS	EWQIMRWFQNKRWKIKKS		ETQISRWFWNKRYKIKKS	EWQIAKWFVNKRWKIKKS			ESQIVDWFRNKRYKIKKS	EAQILIWFKNKRFKIKKS	ESQITKWFDNKRQKIKKS		ERQISKWFENKRRKIKKS	EIQIYEWFTNKRQKIKKS	EKQIQKWFQNKRVKIKKS	EGQISKWFRNKRFKIKKS	EFQIMKWFENKRFKIKKS	EYQISRWFGNKRWKIKKS	ERQILSWFANKRAKIKKS	EEQIRLWFSNKRFKIKKS
>252.159.AAA	>252.101.AAC	>252.167.AAG	>252.105.AAT	>252.171.ACA	>252.98.ACC	>252.51.ACG	>252.71.ACT	>252.156.AGA	>252.135.AGC	>252.136.AGG	>252.165.AGT	>252.189.ATA		>252.131.ATG	>252.86.ATT	>252.77.CAA	>252.63.CAC	>252.235.CAG	>252.103.CAT	>252.112.CCA	>252.249.CCC	>252.141.CCG	>252.79.CCT	>252.205.CGA	>252.167.CGC	>252.30.CGG	>252.115.CGT	>252.161.CTA	>252.26.CTC		>252.76.CTT	>252.52.GAA		>252.40.GAG	>252.23.GAT			>252.25.GCG	>252.25.GCT	>252.46.GGA		>252.57.GGG	>252.70.GGT	>252.46.GTA	>252.24.GTC	>252.31.GTG	>252.70.GTT	>252.44.TAA	>252.60.TAC
ESQILAWFANKRHKIKKS	EAQIGSWFRNKRHKIKKS	ETQIKQWFWNKRWKIKKS	ERQISTWFTNKRFKIKKS	EVQISNWFNNKRRKIKKS	ERQIMTWFHNKRNKIKKS	ETQIVNWFENKRRKIKKS	EAQIRRWFANKR_KIKKS	ESQIQRWFWNKRYKIKKS	ERQIMRWFSNKRVKIKKS	ERQIRTWFRNKRQKIKKS	EVQIELWFENKRGKIKKS	EKQIITWFNNKRAKIKKS		EVQIVYWFQNKRTKIKKS	ERQIVVWFQNKRNKIKKS	EQQILNWFSNKRRKIKKS	EAQISMWFRNKRRKIKKS	EIQISWWFWNKRRKIKKS	ERQIREWFSNKRRKIKKS	EKQISDWFSNKRKKIKKS	ESQIRDWFSNKRKKIKKS	EYQILNWFQNKRKKIKKS	ELQIVNWFSNKRKKIKKS	ERQISDWFGNKRRKIKKS	EVQISCWFNNKRRKIKKS	EGQIVRWFENKRRKIKKS	ECQISNWFSNKRRKIKKS	ERQIAFWFANKRKKIKKS	EVQIMNWFSNKRKKIKKS		EQQISHWFGNKRRKIKKS	EVQIETWFKNKRYKIKKS		ETQISRWFWNKRYKIKKS	ESQISKWFTNKRFKIKKS			ERQIGDWFRNKRYKIKKS	EGQILRWFKNKRYKIKKS	EWQITKWFDNKRQKIKKS		EQQILKWFENKRRKIKKS	EKQITKWFNNKRLKIKKS	EHQIARWFQNKRQKIKKS	E_QIAVWFPNKREKIKKS	ERQIAKWFENKRWKIKKS	ETQIRVWFANKRYKIKKS	EAQIGTWFANKRAKIKKS	EQQIRVWFSNKRVKIKKS
>253.159.AAA	>253.101.AAC	>253.166.AAG	>253.105.AAT	>253.171.ACA	>253.98.ACC	>253.51.ACG	>253.71.ACT	>253.156.AGA	>253.135.AGC	>253.135.AGG	>253.165.AGT	>253.186.ATA		>253.131.ATG	>253.86.ATT	>253.77.CAA	>253.63.CAC	>253.234.CAG	>253.102.CAT	>253.112.CCA	>253.248.CCC	>253.141.CCG	>253.77.CCT	>253.205.CGA	>253.167.CGC	>253.30.CGG	>253.114.CGT	>253.161.CTA	>253.26.CTC		>253.76.CTT	>253.52.GAA		>253.40.GAG	>253.23.GAT			>253.25.GCG	>253.24.GCT	>253.45.GGA		>253.56.GGG	>253.70.GGT	>253.46.GTA	>253.24.GTC	>253.31.GTG	>253.70.GTT	>253.44.TAA	>253.60.TAC
ELQIYYWFVNKRYKIKKS	EAQILAWFRNKRFKIKKS	ELQIMQWFWNKRWKIKKS	ERQIISWFSNKRFKIKKS	EAQILNWFNNKRRKIKKS	ERQILSWFHNKRVKIKKS	ETQIRNWFENKRRKIKKS	EHQINRWFTNKRFKIKKS	EAQIFRWFANKRNKIKKS	EIQIRMWFSNKRVKIKKS	EKQISKWFDNKRQKIKKS	ESQIKKWFENKRHKIKKS	ERQINMWFANKRSKIKKS		EKQIKTWFQNKRDKIKKS	EKQIKVWFQNKRSKIKKS	EVQISMWFANKRRKIKKS	EAQISMWFSNKRRKIKKS	EQQISNWFWNKRRKIKKS	EVQIMQWFSNKRRKIKKS	EPQIANWFANKRKKIKKS	ERQIRDWFLNKRKKIKKS	ERQITNWFQNKRKKIKKS	EQQISDWFSNKRKKIKKS	EIQIRKWFLNKRWKIKKS	EEQIINWFSNKRRKIKKS	EKQITRWFENKRRKIKKS	EAQIMYWFSNKRRKIKKS	ESQIYTWFANKRKKIKKS	ERQIRFWFSNKRKKIKKS		ETQIYNWFANKRSKIKKS	ETQICRWFQNKRWKIKKS		EVQIARWFWNKRYKIKKS	EEQIIRWFCNKRYKIKKS			EIQITWWFRNKRHKIKKS	ERQIRVWFKNKRFKIKKS	ERQIAKWFDNKRRKIKKS		EVQIRVWFTNKRLKIKKS	EVQIMKWFDNKRQKIKKS	ERQIEKWFQNKRHKIKKS	EGQIMKWFRNKRSKIKKS	EPQISKWFENKRHKIKKS	EYQIARWFSNKRAKIKKS	ERQIITWFVNKRAKIKKS	ESQIRVWFSNKRAKIKKS
>254.158.AAA	>254.100.AAC	>254.166.AAG	>254.104.AAT	>254.171.ACA	>254.98.ACC	>254.48.ACG	>254.70.ACT	>254.154.AGA	>254.135.AGC	>254.135.AGG	>254.164.AGT	>254.184.ATA		>254.131.ATG	>254.85.ATT	>254.77.CAA	>254.63.CAC	>254.234.CAG	>254.102.CAT	>254.111.CCA	>254.248.CCC	>254.141.CCG	>254.77.CCT	>254.204.CGA	>254.165.CGC	>254.29.CGG	>254.114.CGT	>254.161.CTA	>254.26.CTC		>254.75.CTT	>254.52.GAA		>254.40.GAG	>254.23.GAT			>254.25.GCG	>254.24.GCT	>254.44.GGA		>254.55.GGG	>254.70.GGT	>254.46.GTA	>254.24.GTC	>254.31.GTG	>254.69.GTT	>254.43.TAA	>254.60.TAC
ETQIASWFANKRHKIKKS	ERQISSWFTNKRFKIKKS	EVQIATWFTNQRFKIKKS	ERQILTWFSNKRHKIKKS	EKQIYNWFLNKRRKIKKS	EKQISNWFHNKREKIKKS	EWQISTWFKNKRFKIKKS	ERQISNWFHNKRVKIKKS	EVQIFRWFANKRWKIKKS	ERQISRWFNNKRVKIKKS	ERQIAKWFENKRQKIKKS	ERQIVKWFENKRFKIKKS	ESQIASWFANKRAKIKKS		ERQIMYWFQNKRTKIKKS	ETQIRTWFQNKRAKIKKS	EIQISCWFANKRRKIKKS	ERQIGDWFRNKRRKIKKS	ESQIKYWFWNKRRKIKKS	EAQIMYWFSNKRRKIKKS	EIQISYWFANKRKKIKKS	ESQIMMWFSNKRKKIKKS	ERQITNWFENKRRKIKKS	EKQISNWFSNKRKKIKKS	ERQIVYWFANKRAKIKKS	EEQIRWWFSNKRRKIKKS	EGQITRWFENKRRKIKKS	EVQISYWFSNKRRKIKKS	EVQIAYWFANKRRKIKKS	ERQIVNWFSNKRKKIKKS		ETQISFWFANKRRKIKKS	ELQIFNWFKNKRHKIKKS		EKQIMVWFWNKRWKIKKS	EIQIMVWFRNKRYKIKKS			ERQITDWFRNKRFKIKKS	EQQIMDWFRNKRFKIKKS	EGQISKWFDNKRWKIKKS		ELQIARWFLNKRVKIKKS	EKQICKWFNNKRSKIKKS	ERQIAKWFANKRRKIKKS	EGQINKWFRNKRSKIKKS	ETQILRWFENKRYKIKKS	ESQIRVWFANKRYKIKKS	ERQILLWFRNKRAKIKKS	EYQIRIWFSNKRSKIKKS
>255.158.AAA	>255.100.AAC	>255.165.AAG	>255.104.AAT	>255.169.ACA	>255.96.ACC	>255.48.ACG	>255.70.ACT	>255.154.AGA	>255.134.AGC	>255.135.AGG	>255.163.AGT	>255.184.ATA		>255.130.ATG	>255.84.ATT	>255.77.CAA	>255.63.CAC	>255.233.CAG	>255.102.CAT	>255.111.CCA	>255.246.CCC	>255.141.CCG	>255.77.CCT	>255.204.CGA	>255.164.CGC	>255.29.CGG	>255.113.CGT	>255.161.CTA	>255.26.CTC		>255.75.CTT	>255.52.GAA		>255.40.GAG	>255.23.GAT			>255.25.GCG	>255.24.GCT	>255.44.GGA		>255.55.GGG	>255.69.GGT	>255.46.GTA	>255.24.GTC	>255.30.GTG	>255.69.GTT	>255.43.TAA	>255.60.TAC
ELQIMYWFVNKRHKIKKS	ERQIGSWFRNKRFKIKKS	EPQIMQWFWNKRYKIKKS	ERQISTWFTNKRFKIKKS	EPQIRYWFENKRRKIKKS	EQQIKDWFHNKRKKIKKS	ENQIRWWFENKRRKIKKS	EWQIATWFKNKRYKIKKS	EKQIRQWFNNKRYKIKKS	EWQIKAWFKNKRYKIKKS	ERQISKWFENKRSKIKKS	ELQIKRWFENKRFKIKKS	ERQIMSWFANKRSKIKKS		EVQIPGWFTNKRGKIKKS	EKQIKVWFQNKRCKIKKS	ESQIHYWFSNKRRKIKKS	ERQISMWFSNKRRKIKKS	ELQIRDWFGNKRMKIKKS	EKQIVSWFSNKRRKIKKS	EVQIQNWFANKRKKIKKS	EVQIGNWFSNKRKKIKKS	EIQIVNWFHNKRKKIKKS	ERQIEGWFGNKRFKIKKS	ERQIFYWFANKRSKIKKS	ERQISMWFNNKRRKIKKS	EAQIRKWFRNKRVKIKKS	ERQIANWFSNKRVKIKKS	ERQIVTWFQNKRKKIKKS	ERQILNWFANKRKKIKKS		EKQITYWFGNKRAKIKKS	ETQIQHWFKNKRWKIKKS		EVQISRWFWNKRWKIKKS	EVQIGVWFRNKRYKIKKS			EEQIVDWFRNKRYKIKKS	EAQIVNWFRNKRYKIKKS	ERQILKWFDNKRVKIKKS		ERQISKWFENKRRKIKKS	ERQIAKWFDNKRQKIKKS	EAQIKRWFQNKRSKIKKS	ETQIIRWFGNKRYKIKKS	ERQIGRWFENKRFKIKKS	EKQIGRWFANKRYKIKKS	ESQITVWFANKRAKIKKS	EIQIMRWFINKRAKIKKS
>256.157.AAA	>256.100.AAC	>256.163.AAG	>256.103.AAT	>256.169.ACA	>256.95.ACC	>256.46.ACG	>256.69.ACT	>256.154.AGA	>256.134.AGC	>256.134.AGG	>256.163.AGT	>256.184.ATA		>256.129.ATG	>256.84.ATT	>256.77.CAA	>256.63.CAC	>256.233.CAG	>256.102.CAT	>256.111.CCA	>256.246.CCC	>256.140.CCG	>256.77.CCT	>256.203.CGA	>256.164.CGC	>256.29.CGG	>256.113.CGT	>256.161.CTA	>256.25.CTC		>256.74.CTT	>256.52.GAA		>256.40.GAG	>256.23.GAT			>256.25.GCG	>256.24.GCT	>256.44.GGA		>256.55.GGG	>256.69.GGT	>256.46.GTA	>256.24.GTC	>256.30.GTG	>256.69.GTT	>256.42.TAA	>256.60.TAC
ERQIHYWFVNKRHKIKKS	ERQIMQWFRNKRFKIKKS	EKQIQQWFWNKRSKIKKS	ERQITTWFTNKRFKIKKS	ERQIANWFHNKRTKIKKS	EKQISSWFHNKRSKIKKS	ERQIGSWFKNKRAKIKKS	ESQITSWFHNKRTKIKKS	ESQIRWWFNNKRSKIKKS	EVQISRWFSNKRVKIKKS	EEQIRKWFENKRYKIKKS	ELQIRKWFENKRWKIKKS	ERQIRWWFNNKRWKIKKS		EKQIVYWFQNKRNKIKKS	ERQISVWFQNKRAKIKKS	EHQIHYWFANKRRKIKKS	EGQIAQWFRNKRRKIKKS	EPQISWWFWNKRRKIKKS	ETQILTWFANKRRKIKKS	ESQIRDWFQNKRKKIKKS	EKQIRDWFSNKRKKIKKS	ERQISDWFSNKRKKIKKS	ESQIHNWFSNKRKKIKKS	ETQIAHWFANKRRKIKKS	ELQIQRWFSNKRRKIKKS	EKQILLWF_NKRKKIKKS	EIQITYWFSNKRVKIKKS	EKQISYWFGNKRKKIKKS	ERQIMFWFSNKRKKIKKS		ERQIVDWFGNKRKKIKKS	ELQIKRWFQNKRWKIKKS		ERQICRWFWNKRYKIKKS	EVQIRVWFSNKRYKIKKS			EMQITDWFRNKRYKIKKS	EMQIYDWFRNKRYKIKKS	ETQIMKWFDNKRQKIKKS		ESQILKWFENKRAKIKKS	EKQIVKWFNNKRMKIKKS	EVQICRWFQNKRSKIKKS	EKQIIKWFANKRSKIKKS	EGQIVRWFENKRFKIKKS	ERQIGRWFSNKRYKIKKS	ERQIGLWFCNKRAKIKKS	ETQIRLWFSNKRAKIKKS
>257.155.AAA	>257.100.AAC	>257.161.AAG	>257.102.AAT	>257.167.ACA	>257.95.ACC	>257.46.ACG	>257.68.ACT	>257.153.AGA	>257.133.AGC	>257.134.AGG	>257.162.AGT	>257.183.ATA		>257.128.ATG	>257.84.ATT	>257.76.CAA	>257.63.CAC	>257.231.CAG	>257.102.CAT	>257.109.CCA	>257.246.CCC	>257.140.CCG	>257.76.CCT	>257.202.CGA	>257.163.CGC	>257.29.CGG	>257.112.CGT	>257.159.CTA	>257.25.CTC		>257.74.CTT	>257.52.GAA		>257.39.GAG	>257.23.GAT			>257.25.GCG	>257.24.GCT	>257.44.GGA		>257.54.GGG	>257.69.GGT	>257.46.GTA	>257.24.GTC	>257.30.GTG	>257.69.GTT	>257.42.TAA	>257.60.TAC
EVQIVSWFSNKRHKIKKS	ERQIGQWFRNKRMKIKKS	EKQIRQWFWNKRFKIKKS	EKQIVQWFCNKRFKIKKS	ETQIQNWFNNKRRKIKKS	ELQIGNWFSNKRKKIKKS	ELQIRWWFENKRRKIKKS	EPQIGAWFRNKRLKIKKS	ERQIFYWFANKRYKIKKS	EEQIKRWFNNKRVKIKKS	ERQIQKWFENKRRKIKKS	ELQIP_WF_NKRWKIKKS	ERQIYYWFCNKRVKIKKS		EKQIQYWFQNKRTKIKKS	EDQIM_WF_NKRVKIKKS	EQQIMYWFQNKRRKIKKS	EMQIAMWFRNKRRKIKKS	EHQISWWFWNKRRKIKKS	EQQISNWFANKRRKIKKS	ERQIAGWFQNKRKKIKKS	ERQISDWFSNKRKKIKKS	EKQIANWFQNKRKKIKKS	EAQIANWFANKRKKIKKS	ERQIYFWFQNKRAKIKKS	EIQIRHWFSNKRRKIKKS	ERQIRRWFENKRRKIKKS	EVQIVNWFSNKRRKIKKS	EQQIRYWFSNKRAKIKKS	EVQISNWFKNKRKKIKKS		EVQIVNWFANKRKKIKKS	ETQIQRWFQNKRWKIKKS		EQQITRWFWNKRYKIKKS	ERQIMVWFRNKRWKIKKS			ESQIGDWFRNKRYKIKKS	ERQIRAWFKNKRFKIKKS	ERQIMKWFDNKRSKIKKS		EKQILKWFENKRWKIKKS	ERQIAKWFDNKRVKIKKS	ERQIDRWFQNKRAKIKKS	EAQIPRWFGNKRKKIKKS	ERQIMRWFENKRWKIKKS	ERQIAVWFANKRWKIKKS	RGADPPVFMNKRRKIKKS	EEQIRVWFSNKRQKIKKS
>258.155.AAA	>258.100.AAC	>258.161.AAG	>258.102.AAT	>258.166.ACA	>258.95.ACC	>258.46.ACG	>258.68.ACT	>258.151.AGA	>258.131.AGC	>258.133.AGG	>258.161.AGT	>258.183.ATA		>258.127.ATG	>258.83.ATT	>258.76.CAA	>258.62.CAC	>258.228.CAG	>258.102.CAT	>258.109.CCA	>258.245.CCC	>258.140.CCG	>258.75.CCT	>258.200.CGA	>258.163.CGC	>258.28.CGG	>258.111.CGT	>258.159.CTA	>258.25.CTC		>258.73.CTT	>258.52.GAA		>258.39.GAG	>258.23.GAT			>258.25.GCG	>258.24.GCT	>258.44.GGA		>258.54.GGG	>258.69.GGT	>258.46.GTA	>258.23.GTC	>258.30.GTG	>258.69.GTT	>258.42.TAA	>258.59.TAC
ERQIYYWFVNKRFKIKKS	EMQIAAWFRNKRHKIKKS	EQQISQWFWNKRHKIKKS	EKQILQWFANKRFKIKKS	ERQIIDWFNNKRRKIKKS	ERQIASWFHNKRMKIKKS	ESQIRNWFDNKRRKIKKS	EKQIIGWFHNKRMKIKKS	ERQIGQWFWNKRYKIKKS	EMQITRWFSNKRVKIKKS	ETQINKWFENKRYKIKKS	EHQIKIWFQNKRYKIKKS	EKQIRTWFNNKRVKIKKS		ELQIWRWFPNKRVKIKKS	EVQIKIWFQNKRSKIKKS	EMQIFQWFANKRRKIKKS	EEQIRCWFSNKRRKIKKS	EQQIKHWFWNKRRKIKKS	ENQIAWWFSNKRRKIKKS	ESQIMHWFQNKRKKIKKS	ESQILCWFSNKRKKIKKS	ETQIMNWFENKRKKIKKS	EQQISNWFHNKRKKIKKS	ECQIFNWFANKRRKIKKS	ERQIGCWFSNKRRKIKKS	ENQISHWFENKRRKIKKS	EQQIGNWFSNKRRKIKKS	EKQIEYWFSNKRKKIKKS	EVQIMNWFKNKRKKIKKS		ERQILFWFGNKRKKIKKS	EGQIHHWFKNKRWKIKKS		EGQIMRWFMNKRYKIKKS	ERQIDMWFKNKRYKIKKS			EMQIGDWFRNKRYKIKKS	EVQIVTWFKNKRFKIKKS	EKQIAKWFDNKRAKIKKS		EKQITKWFENKRLKIKKS	ESQIVKWFNNKRCKIKKS	EPQIIRWFQNKRSKIKKS	EHQINKWFRNKRFKIKKS	EMQIAMWFWNKRQKIKKS	ERQILKWFGNKRFKIKKS	ERQINVWFSNKRAKIKKS	ENQIRVWFSNKRAKIKKS
>259.152.AAA	>259.100.AAC	>259.161.AAG	>259.101.AAT	>259.166.ACA	>259.94.ACC	>259.45.ACG	>259.67.ACT	>259.150.AGA	>259.131.AGC	>259.132.AGG	>259.161.AGT	>259.183.ATA		>259.127.ATG	>259.83.ATT	>259.76.CAA	>259.62.CAC	>259.227.CAG	>259.102.CAT	>259.109.CCA	>259.245.CCC	>259.140.CCG	>259.75.CCT	>259.198.CGA	>259.162.CGC	>259.28.CGG	>259.111.CGT	>259.155.CTA	>259.25.CTC		>259.73.CTT	>259.52.GAA		>259.39.GAG	>259.23.GAT			>259.24.GCG	>259.24.GCT	>259.44.GGA		>259.54.GGG	>259.69.GGT	>259.46.GTA	>259.23.GTC	>259.30.GTG	>259.68.GTT	>259.41.TAA	>259.59.TAC
ESQISSWFANKRHKIKKS	EVQIGVWFRNKRFKIKKS	EQQISQWFWNKRFKIKKS	ERQIMSWFSNKRFKIKKS	EVQIGNWFNNKRRKIKKS	EKQISSWFHNKRTKIKKS	ERQIRYWFDNKRRKIKKS	EEQIAWWFGNKRWKIKKS	EWQIGSWFKNKRYKIKKS	ERQILRWFSNKRVKIKKS	ERQITKWFENKRTKIKKS	EWQIRKWFENKRYKIKKS	ERQIVYWFQNKRVKIKKS		ERQIMVWFQNKRMKIKKS	ERQIACWFQNKRAKIKKS	ETQIHNWFVNKRRKIKKS	ENQIAYWFSNKRRKIKKS	EPQISYWFWNKRRKIKKS	ELQIAYWFSNKRRKIKKS	EKQIITWFQNKRKKIKKS	EKQILTWFSNKRKKIKKS	EAQITNWFQNKRKKIKKS	EVQITNWFHNKRMKIKKS	ERQIMHWFGNKRMKIKKS	EKQIGYWFNNKRRKIKKS	EMQIIRWFENKRRKIKKS	EVQIYNWFSNKRRKIKKS	EAQISHWFSNKRRKIKKS	ELQIVYWFGNKRKKIKKS		ESQIRFWFGNKRSKIKKS	EVQITGWFKNKRYKIKKS		EQQIQRWFWNKRYKIKKS	ERQIVHWFRNKRYKIKKS			EFQIMNWFRNKRYKIKKS	ERQISDWFRNKRQKIKKS	ERQINKWFDNKRCKIKKS		EMQIMKWFENKRRKIKKS	ERQICKWFDNKRQKIKKS	EFQITKWFQNKRSKIKKS	EKQILKWFSNKRRKIKKS	EVQILRWFENKRYKIKKS	ELQIQRWFANKRFKIKKS	EAQIRVWFCNKRAKIKKS	EGQIRVWFSNKRAKIKKS
[truncated: 5,296 more rows]
[truncated: 14 more columns]
