# Supplementary material for: Exploring the DNA-recognition potential of homeodomains
Source: HighWire-hosted journal article supplement (doi:10.1101/gr.139014.112), 2012-04-26
Supplement: chu_SupTableS4.xlsx [file chu_SupTableS4.xlsx]

## Sheet: FisherExactTestResults.xls
TAANNN site	HDs w/ positive charge both pos 43 & 46	HDs w/ positive charge only pos 43	HDs w/ positive charge only pos 46	HDs w/ positive charge neither pos 43 & 46	total number of HDs	expected frequency of coocurrence assuming independence	actual frequency coocurrence	difference	odds.ratio	confidence interval 95percent low end	confidence interval 95percent high end	B-H adjusted p-value
TTT	31	416	202	57	706	0.208956	0.0439093	0.165046	0.0212454	0.0127835	0.0343716	4.96127e-86
TTC	78	130	572	24	804	0.209153	0.0970149	0.112138	0.0253817	0.0147544	0.0422308	3.4351e-67
ATA	86	816	195	241	1338	0.14158	0.064275	0.0773045	0.130501	0.0961417	0.176034	1.07688e-45
ATT	132	223	213	67	635	0.303739	0.207874	0.0958646	0.186732	0.129178	0.267622	6.37747e-22
TTA	21	293	119	215	648	0.104691	0.0324074	0.0722832	0.129883	0.0750264	0.215824	2.31092e-19
TAT	19	107	98	48	272	0.199259	0.0698529	0.129406	0.0879142	0.0453507	0.163684	1.09654e-17
CGC	37	265	243	396	941	0.0954961	0.0393199	0.0561762	0.227854	0.151426	0.335601	2.75395e-16
TGC	50	79	118	18	265	0.308608	0.188679	0.119929	0.0975614	0.0495965	0.183997	1.2123e-15
TGA	20	303	34	39	396	0.111226	0.0505051	0.0607208	0.076546	0.0376503	0.151569	1.06045e-14
AAT	12	365	45	141	563	0.0677953	0.0213144	0.0464809	0.103497	0.0483545	0.206012	4.38897e-13
TAA	8	282	37	95	422	0.07328	0.0189573	0.0543227	0.0733817	0.0284886	0.167195	5.47924e-13
CAC	4	334	142	1151	1631	0.0185508	0.00245248	0.0160983	0.0971458	0.0259179	0.257224	3.77836e-10
TGT	19	266	37	76	398	0.100755	0.0477387	0.0530163	0.147603	0.0755064	0.280547	1.0132e-09
TTG	9	345	91	590	1035	0.0330463	0.00869565	0.0243506	0.169345	0.0740881	0.341529	6.98218e-09
AAG	35	378	83	262	758	0.0848191	0.0461741	0.038645	0.29276	0.185345	0.454677	2.27471e-08
AAA	31	517	67	319	934	0.061562	0.0331906	0.0283714	0.285882	0.176275	0.45509	6.27439e-08
GCC	3	38	58	44	143	0.122304	0.020979	0.101325	0.0609516	0.0113203	0.211323	6.44489e-08
TGG	13	190	26	68	297	0.0897527	0.043771	0.0459817	0.180179	0.0801084	0.38746	5.42121e-06
ACA	110	347	217	372	1046	0.136584	0.105163	0.0314217	0.543741	0.409639	0.719292	3.04051e-05
ACC	30	266	63	196	555	0.0893694	0.0540541	0.0353153	0.351544	0.211112	0.575051	3.79654e-05
TCG	19	204	86	327	636	0.0578869	0.0298742	0.0280126	0.354661	0.197496	0.609301	0.00014572
TAC	82	28	570	83	763	0.123194	0.107471	0.015724	0.427022	0.257009	0.723286	0.00321533
GGG	3	155	27	246	431	0.0255167	0.00696056	0.0185561	0.176862	0.0337543	0.589563	0.00361789
ACG	64	102	121	99	386	0.206113	0.165803	0.0403098	0.514265	0.333418	0.789518	0.00387274
CTC	20	69	84	123	296	0.105643	0.0675676	0.0380752	0.425605	0.227242	0.771626	0.00858049
CTT	8	166	51	371	596	0.0289007	0.0134228	0.0154779	0.351081	0.140704	0.767211	0.0101326
CGG	8	117	32	155	312	0.0513642	0.025641	0.0257232	0.332217	0.127434	0.770946	0.0130414
CCG	33	293	89	446	861	0.0536502	0.0383275	0.0153226	0.564761	0.356858	0.876636	0.0197394
CTA	15	279	69	610	973	0.0260856	0.0154162	0.0106694	0.475616	0.248126	0.858046	0.0197394
AGT	234	318	299	298	1149	0.222857	0.203655	0.0192016	0.733598	0.577049	0.932068	0.0197394
AAC	7	578	40	1234	1859	0.007956	0.00376546	0.00419054	0.373776	0.140414	0.850041	0.0227056
GGT	14	399	40	526	979	0.023269	0.0143003	0.00896873	0.461747	0.228741	0.8813	0.0306572
CGA	31	433	63	534	1061	0.0387449	0.0292177	0.00952723	0.607118	0.374375	0.967284	0.0571123
GTG	2	108	18	224	352	0.0177557	0.00568182	0.0120739	0.23116	0.0255582	0.993649	0.0837323
ATC	17	20	57	137	231	0.0513109	0.0735931	-0.0222822	2.03618	0.928349	4.43338	0.101837
GGA	8	181	23	230	442	0.0299902	0.0180995	0.0118906	0.442754	0.167152	1.0552	0.105184
AGG	85	341	57	326	809	0.0924274	0.105068	-0.0126406	1.425	0.971612	2.10144	0.111119
TAG	11	386	12	183	592	0.026054	0.0185811	0.00747295	0.435251	0.170453	1.10017	0.113658
AGC	56	260	92	303	711	0.0925145	0.0787623	0.0137521	0.709708	0.479567	1.04375	0.127023
GGC	2	54	17	127	200	0.0266	0.01	0.0166	0.278036	0.0301438	1.23696	0.168806
CCA	10	257	36	532	835	0.0176155	0.011976	0.0056395	0.575355	0.2506	1.20678	0.225591
GCG	2	93	13	200	308	0.0150215	0.00649351	0.008528	0.331787	0.035636	1.51139	0.245192
GTT	30	172	120	497	819	0.0451726	0.03663	0.00854254	0.722656	0.450433	1.13197	0.257121
CAA	1	422	13	1271	1707	0.00203236	0.000585823	0.00144654	0.231805	0.00544263	1.55199	0.30567
ACT	56	135	74	138	403	0.152886	0.138958	0.0139278	0.774072	0.496394	1.20298	0.344287
TCC	4	65	31	262	362	0.0184289	0.0110497	0.0073792	0.520864	0.129028	1.54986	0.370185
TCA	10	166	34	362	572	0.0236686	0.0174825	0.00618612	0.641849	0.276048	1.36808	0.412395
CAT	23	770	79	2036	2908	0.00956499	0.00790922	0.00165577	0.7699	0.458166	1.24872	0.412395
GCA	0	66	4	158	228	0.00507849	0	0.00507849	0	0	3.72131	0.42528
GCT	8	101	25	201	335	0.0320517	0.0238806	0.00817108	0.637632	0.23974	1.52391	0.42528
CCC	34	424	88	885	1431	0.0272864	0.0237596	0.00352678	0.806531	0.517277	1.23385	0.453141
GAC	0	20	15	165	200	0.0075	0	0.0075	0	0	2.52352	0.457151
ATG	42	282	50	276	650	0.0705515	0.0646154	0.00593609	0.822377	0.514163	1.31033	0.519323
CTG	16	70	18	55	159	0.11566	0.100629	0.0150311	0.700017	0.303074	1.60325	0.519323
TCT	1	88	14	428	531	0.0047347	0.00188324	0.00285146	0.347888	0.00812847	2.34376	0.556701
AGA	99	270	135	413	917	0.102684	0.107961	-0.00527656	1.12158	0.819516	1.53219	0.556701
CAG	18	205	58	528	809	0.0258953	0.0222497	0.00364564	0.799561	0.432409	1.41641	0.562203
CGT	13	277	13	365	668	0.0168973	0.0194611	-0.00256374	1.31713	0.552869	3.13824	0.604007
GTC	8	51	41	187	287	0.0350982	0.0278746	0.00722359	0.716212	0.272629	1.67633	0.60791
CCT	5	188	14	374	581	0.0108632	0.00860585	0.00225737	0.71088	0.197369	2.12846	0.667362
GAG	7	141	17	265	430	0.0192104	0.0162791	0.00293131	0.774324	0.26499	2.02207	0.695672
GAT	2	56	14	260	332	0.00841922	0.0060241	0.00239512	0.663995	0.0712944	3.01963	0.771682
GTA	17	169	70	614	870	0.0213793	0.0195402	0.00183908	0.882458	0.473655	1.56514	0.795283
GAA	8	104	49	552	713	0.0125578	0.0112202	0.00133761	0.86673	0.344284	1.91698	0.850362
	HDs w/ positive charge both pos 43 & 46	HDs w/ positive charge only pos 43	HDs w/ positive charge only pos 46	HDs w/ positive charge neither pos 43 & 46	total number of HDs	expected frequency of coocurrence assuming independence	actual frequency coocurrence	difference	odds.ratio	conf.interval.95percent.low	conf.interval.95percent.high	p-value
entire dataset	1881	15043	5532	22025	44481	0.0634086	0.0422877	0.0211208	0.497	0.47	0.527	3.74e-140
