# Supplementary material for: Exploring the DNA-recognition potential of homeodomains
Source: HighWire-hosted journal article supplement (doi:10.1101/gr.139014.112), 2012-04-26
Supplement: chu_SupTableS5.xlsx [file chu_SupTableS5.xlsx]

## Sheet: Sheet1
# of HD_The triplet the HD variant was selected from_key residues of HD	Sequencing Barcode	Restriction Site for Illumina adaptor attachment
1_TTT_RTVAA	TTT	BamHI
2_TTT_RTVSA	TGT	BamHI
4_TTC_VRVSA	TCT	BamHI
5_TTC_TRVAA	TAT	BamHI
6_TTA_VRVAA	GTT	BamHI
7_TTA_RVLRA	GGT	BamHI
8_TGT_RVVSQ	GCT	BamHI
9_TGG_KTTQD	GAT	BamHI
10_TGG_KSVMQ	AA	BamHI
11_TGA_KSVAQ	CA	BamHI
12_TGA_RGVAA	GA	BamHI
13_TCT_ATVKA	TA	BamHI
14_TCG_KGTQM	AC	BamHI
15_TCC_RMIKS	CC	BamHI
17_TAT_TRVSA	GC	BamHI
18_TAG_RLTQA	TC	BamHI
19_TAG_RMVSA	AG	BamHI
20_TAC_QRVSA	CG	BamHI
21_TAC_ERVSV	GG	BamHI
22_TAA_RITAA	TG	BamHI
23_GTT_GTRAY	AT	BamHI
24_GTG_HLIQY	CT	BamHI
25_GTA_YTRQV	GT	BamHI
26_GGT_ALKNM	TT	BamHI
27_GGT_LTKDQ	TTCT	BamHI
28_GGG_RSKER	TGGA	BamHI
29_GGC_TLKNQ	TCAC	BamHI
30_GGA_LAKDQ	TATG	BamHI
31_GCT_KITKF	GTGC	BamHI
32_GCC_VRLKY	GGCG	BamHI
33_GCA_ALRQQ	GCTT	BamHI
34_GAT_RTMRY	GAAA	BamHI
35_GAG_VMRWY	CTAG	BamHI
36_GAC_ATRRF	CGTC	BamHI
37_GAA_RFQKF	CCCA	BamHI
38_CTA_LHYAK	CAGT	BamHI
39_CTA_IFNAK	ATTA	BamHI
40_CGG_STRER	CTT	NcoI
41_CGC_RVMSR	CGT	NcoI
42_CGA_TFYAA	CCT	NcoI
43_CCT_MTNGK	CAT	NcoI
44_CCT_RGDSK	ATT	NcoI
45_CCG_RCYEK	AGT	NcoI
46_CCC_RLDSK	ACT	NcoI
47_CCA_KMTQK	AAT	NcoI
48_CCA_EHNAK	AA	NcoI
49_CAT_LSQSR	CA	NcoI
50_CAT_MMCSR	GA	NcoI
51_CAG_MSHWR	TA	NcoI
52_CAC_LGMRR	AC	NcoI
53_CAC­_ERVSR	CC	NcoI
54_CAA_LMYQR	GC	NcoI
55_CAA­_LHYVR	TC	NcoI
56_ATT_HRVQA	AG	NcoI
57_ATG_LTYQW	CG	NcoI
58_ATG_RVYQW	GG	NcoI
59_ATC_TRMAF	TG	NcoI
60_ATA_KTVQV	AT	NcoI
61_AGT_KGKEW	CT	NcoI
62_AGG_SHKEY	GT	NcoI
63_AGC_QSRNV	TT	NcoI
64_AGA_AFRAH	TTCT	NcoI
65_AGA_GSRWY	TGGA	NcoI
66_ACT­_KTSHM	TCAC	NcoI
67_ACT_MKYEK	TATG	NcoI
68_ACG_SRYDR	GTGC	NcoI
69_ACG_VKYER	GGCG	NcoI
70_ACC_KTSHM	GCTT	NcoI
71_ACA_MTNNR	GAAA	NcoI
72_AAT_KMSNF	CTAG	NcoI
73_AAT_KLTAF	CGTC	NcoI
74_AAG­_STSAH	CCCA	NcoI
75_AAC_SISRF	CAGT	NcoI
76_AAA_RAQWF	ATTA	NcoI
77_AAA_KEYVH	AGAT	NcoI
168_ACG_SRYDR	TGGA	BamHI
201_TGC_VRVSQ	TCAC	BamHI
202_GTG_NAREF	TATG	BamHI
203_GTC_VQKRF	GTGC	BamHI
204_GCG_RTDRY	GGCG	BamHI
205_GAA_TQRQW	GCTT	BamHI
207_CTT_ITYGK	GAAA	BamHI
208_CTC_HFNRK	CTAG	BamHI
209_CGC_PRDSR	CGTC	BamHI
210_CCG_RSNQK	CCCA	BamHI
211_ATT_TKNQN	CAGT	BamHI
212_ATA_RVTNA	ATTA	BamHI
213_AGG_KMKES	AGAT	BamHI
215_TTC_KRLAA	AACC	BamHI
216_TGC_NRVMM	TTT	BamHI
217_GGG_KSKEG	TGT	BamHI
218_CTG_KQNQK	TCT	BamHI
219_CTG_KVYER	TAT	BamHI
220_CTG_LTYQK	GTT	BamHI
221_CTG_RLYQK	GGT	BamHI
222_CTC_SKYGK	GCT	BamHI
223_CTC_RTFGK	GAT	BamHI
224_CCC_IMNSK	CTT	BamHI
225_AAC_SLQRF	CGT	BamHI
226_TTT_KMISA	ATT	BamHI
227_TTT_YRIAA	AGT	BamHI
228_TTG_KMLQA	ACT	BamHI
229_TTC_GRISA	AAT	BamHI
230_TGC_ERISQ	AA	BamHI
232_TCG_IKNQM	CA	BamHI
233_TCG_VMNQQ	GA	BamHI
234_TCA_AMVQR	TA	BamHI
235_TAT_RAVSV	AC	BamHI
236_TAG_KSTQM	CC	BamHI
237_TAG_YAVNA	GC	BamHI
238_TAC_QRISV	TC	BamHI
239_TAA_RTVRA	TTCT	NcoI
240_GTT_SSRGF	TGGA	NcoI
241_GTT_GLRAF	TCAC	NcoI
242_GTC_LQRGA	TATG	NcoI
243_GGT_ATKSM	GTGC	NcoI
244_GGT_KMKSV	GGCG	NcoI
245_GCT_RAVKW	GCTT	NcoI
246_GCT_ISVKY	GAAA	NcoI
247_GCG_RTDRS	CTAG	NcoI
249_GCA_QLKQS	CGTC	NcoI
250_GAT_AGKTF	CCCA	NcoI
251_CTT_VGYSR	CAGT	NcoI
252_CTC_LRYSK	ATTA	NcoI
253_CGT_VANSR	AGAT	NcoI
255_CCT_RADGK	AACC	NcoI
256_CCA_RLYQK	TTT	NcoI
257_CAT_KLCSR	TGT	NcoI
258_ATT_RTVQQ	TCT	NcoI
259_ATA_KMYAW	TAT	NcoI
260_ATA_KAYNA	GTT	NcoI
261_AGG_KSKEA	GGT	NcoI
262_AGA_QFRAW	GCT	NcoI
263_AGA_VRFAA	GAT	NcoI
264_ACT_KVYHV	CTT	NcoI
265_ACG_WYSKY	CGT	NcoI
266_ACC_KACHS	CCT	NcoI
267_ACA_RVSHT	CAT	NcoI
268_AAT_KLQAF	ATT	NcoI
269_AAT_KVTNF	AGT	NcoI
270_AAG_RAQWF	ACT	NcoI
271_AAC_KLQRF	AAT	NcoI
272_AAC_VAQRC	AG	NcoI
1_AAG_RSQWH	TTCT	NcoI
2_ATA_LRWNS	TGGA	NcoI
3_CTC_VMNRK	TCAC	NcoI
4_CTG_TTNQK	TATG	NcoI
5_GAT_VGRLY	GTGC	NcoI
6_GCA_RHDRA	GGCG	NcoI
7_GCA_RYDRA	GCTT	NcoI
8_GCG_RLDRF_	GAAA	NcoI
9_GCG_RLDRY	CTAG	NcoI
10_GTC_YRRGA	CGTC	NcoI
11_GTC_YRRGF	CCCA	NcoI
12_no_HD	CAGT	NcoI
13_12-En(SB)	ATTA	NcoI
