# Supplementary material for: Exploring the DNA-recognition potential of homeodomains
Source: HighWire-hosted journal article supplement (doi:10.1101/gr.139014.112), 2012-04-26
Supplement: chu_SupTableS8.xlsx [file chu_SupTableS8.xlsx]

## Sheet: Sheet1
List of validated HD variants that associate with novel and previously defined specificity determinants
KR47 à Gnn	IVT47 à Tnn	N47 à Ynn	R50 à nWC	W50 à nAG	H50 à MCn	E50 à nBG	K50 à KCC	F54 à Rnn	K54 à CYn	R54 à CRn	Y54 à Gnn
26_ALKNM	15_RMIKS	39_IFNAK	52_LGMRR	51_MSHWR	267_RVSHT	28_RSKER	15_RMIKS	59_TRMAF	210_RSNQK	52_LGMRR	305_VGRLY
27_LTKDQ	226_KMISA	43_MTNGK	225_SLQRF	76_RAQWF	70_KTSHM	213_KMKES	32_VRLKY	75_SISRF	46_RLDSK	49_LSQSR	309_RLDRY
28_RSKER	227_YRIAA	48_EHNAK	272_VAQRC	270_RAQWF	264_KVYHV	217_KSKEG	13_ATVKA	36_ATRRF	44_RGDSK	53_ERVSR	35_VMRWY
29_TLKNQ	229_GRISA	71_MTNNR	36_ATRRF	301_RSQWH	66_KTSHM	40_STRER	265_WYSKY	308_RLDRF	67_MKYEK	55_LHYVR	65_GSRWY
30_LAKDQ	230_ERISQ	210_RSNQK	308_RLDRF	35_VMRWY	266_KACHS	261_KSKEA	246_ISVKY	203_VQKRF	45_RCYEK	51_MSHWR	34_RTMRY
61_KGKEW	238_QRISV	211_TKNQN	271_KLQRF	65_GSRWY		61_KGKEW	245_RAVKW	31_KITKF	43_MTNGK	54_LMYQR	32_VRLKY
62_SHKEY	9_KTTQD	218_KQNQK	203 _VQKRF			62_SHKEY		241_GLRAF	224_IMNSK	253_VANSR	265_WYSKY
23_VQKRF	14_KGTQM	224_IMNSK						73_KLTAF	207_ITYGK	40_STRER	246_ISVKY
213_KMKES	18_RLTQA	232_IKNQM						202_NAREF	222_SKYGK	168_SRYDR	204_RTDRY
217_KSKEG	22_RITAA	233_VMNQQ						240_SSRGF	38_LHYAK	251_VGYSR	23_GTRAY
243_ATKSM	212_RVTNA	253_VANSR						311_YRRGF	252_LRYSK	257_KLCSR	24_HLIQY
244_KMKSV	236_KSTQM	303_VMNRK						37_RFQKF	48_EHNAK	209_PRDSR	62_SHKEY
249_QLKQS	1_RTVAA	304_TTNQK						250_AGKTF	47_KMTQK
250_AGKTF	2_RTVSA							72_KMSNF	220_LTYQK
261_KSKEA	4_VRVSA							225_SLQRF	221_RLYQK
23_GTRAY	5_TRVAA							271_KLQRF	304_TTNQK
25_YTRQV	6_VRVAA							76_RAQWF	218_KQNQK
33_ALRQQ	8_RVVSQ							270_RAQWF
35_VMRWY	10_KSVMQ							268_KLQAF
36_ATRRF	11_KSVAQ							269_KVTNF
65_GSRWY	12_RGVAA
202_NAREF	13_ATVKA
205_TQRQW	17_TRVSA
240_SSRGF	19_RMVSA
241_GLRAF	20_QRVSA
242_LQRGA	21_ERVSV
262_QFRAW	56_HRVQA
35_VGRLY	60_KTVQV
310_YRRGA	201_VRVSQ
311_YRRGF	216_NRVMM
	235_RAVSV
	237_YAVNA
	239_RTVRA
	258_RTVQQ
