# Supplementary material for: Exploring the DNA-recognition potential of homeodomains
Source: HighWire-hosted journal article supplement (doi:10.1101/gr.139014.112), 2012-04-26
Supplement: SuppREVLegends.docx [file SuppREVLegends.docx]

**SUPPLEMENTARY FIGURE LEGENDS**

**Supplemental Figure 1.** The B1H selection system.

(A) Schematic illustrating the components used for the B1H selection of HDs with novel specificity. The HD library (rainbow) is displayed as a C-terminal fusion to omega-Zif12 with a fixed binding site present within the reporter vector (cyan). (B) Schematic illustrating the components used to identify preferred binding sites for each HD variant (cyan). HDs are displayed as fusions to the C-terminus of the omega-Zif12, where compatible binding sites are selected from a 10-base pair randomized library (rainbow) in the reporter vector.

**Supplemental Figure 2.** Stringency used to select HDs for different target sites.

Chart indicating the stringency used to select HDs for each of the 64 TAANNN sites. The bases present at positions 4, 5 (left of rows) & 6 (above each column) are indicated, where the number in each cell represents the concentration of 3-AT (mM) used for selection against that target site.

**Supplemental Figure 3.** Logos representing the sequences of the recovered HDs from each target site selection.

Frequency logos representing the top 200 unique HDs sequences recovered for each of the 64 target sites from Illumina sequencing. Red circles indicate the randomized positions in the HD library.

**Supplemental Figure 4.** DNA-binding specificity of selected HD variants.

The calculated recognition motifs (bit scale) determined for each HD variant using the randomized 10-base pair library. The clone ID numbers and the amino acids that are present at the randomized recognition positions (43,46,47,50 & 54) are indicated above each motif.

**Supplemental Figure 5.** Diversity in the specificity of extant HDs.

A grid illustrating the different 3’ specificities found in previously measured extant HDs from Noyes M.B. and colleagues (Noyes et al. 2008a), Berger M.F. and colleagues (as denoted by *) (Berger et al. 2008), Steadman D.J. and colleagues (as denoted by @) (Steadman et al. 2000), and Jauch R. and colleagues (as denoted by #) (Jauch et al. *J Mol Biol* **376**(3): 758-770, 2008).

**Supplemental Figure 6.** Determination of the dissociation constant for each HD variant.

Apparent equilibrium dissociation constant as measured by EMSA for the HD variant TQRQW.

**Supplemental Figure 7.** Determination of the dissociation constant for different binding sites through cold competition.

Apparent equilibrium dissociation constants were measured by cold competition for the HD variant TQRQW. The degree of competition achieved by titration of a cold competitor duplex containing (A) its preferred binding site, TAAGTA, or (B) the *engrailed* binding site, TAATTA, was measured by the decrease in complex formation with the labeled preferred binding site as a function of increasing concentration of the competitor.

**Supplemental Figure 8.** Robust function of these New specificity determinants

Grafting key residues (43, 46, 47, 50 & 54) selected from the *engrailed* HD library into the HD backbone of the Hox factor Dfd, Scr or Ubx results in a factor with a similar binding preference to that observed when the key residues are present in Engrailed.

**Supplemental Figure 9.** New specificity determinants function with 5’ specificity alterations

Mutating the 5’ specificity determinants R3K and K55R specifically alters 5’ binding preference from TAANNN to TGANNN while the 3’ binding preference remains unchanged.

**Supplemental Figure 10.** Additional modeling of HD variants.

(A) Model of HD variant ATVKA bound to its cognate site taaTCC. (B) Model of HD variant ERVSR bound to its cognate site taaCAC. (C) Model of HD variant TRMAF bound to its cognate site taaATC**.** (D) Model of HD variant RVSHT bound to its cognate site taaACA. (E) Model of HD variant TQRQW bound to its cognate site taaGTA. (F) Model of HD variant HLIQY bound to its cognate site taaGTG**.** (G) Model of HD variant KLTAF bound to its cognate site taaGTA. (H) Model of HD variant RTMRY bound to its cognate site taaGAC. (I) Model of HD variant RSKER bound to its cognate site taaGGC. (J) Model of HD variant MSHWR bound to its cognate site taaCAG.Dotted lines indicate interactions of less than 4 Å between the protein and DNA (either hydrogen bonds or van der Waals interactions).

**Supplemental Figure 11.** Limited diversity at the key recognition positions is observed in extant HDs.

(A) Frequency logo displaying the diversity of residues (circled in red are the residues randomized in the HD library) at various positions in the N51-containing HDs of humans, mice, *D. rerio*, *C. elegans*, *D. melanogaster*, and *S. cerevisiae*. (B) Frequency logo representing the diversity of residues found in our selected HDs that were characterized using the ZF10 library.

**Supplemental Figure 12.** MSE contribution per position in refined RF recognition models, where the panels correspond to the Trials in Supplemental Table S9.

**SUP TABLES**

**Supplemental Table S1**

Barcode adapter sequences used in Illumina sequencing.

**Supplemental Table S2**

Barcode adapter and restriction site used for adaptor ligation for each binding site-HD library selection to characterize the population of selected recognition helices by Illumina sequencing.

**Supplemental Table S3**

Translated Illumina sequencing identified for each 3' binding site of all HDs identified from Illumina sequencing of recovered selection clones.

**Supplemental Table S4**

Anticorrelation of positively charged residues at positions 43 and 46 for each triplet site, grouped for individual sites as labeled, and for all triplet sites combined. The significance of the deviation from independence observed in the data is assessed through a two-sided Fisher Exact Test and the associated B-H adjusted p-value.

**Supplemental Table S5**

Barcode adapter and restriction site used for adaptor ligation for each HD variant-ZF10 library selection characterized by Illumina sequencing.

**Supplemental Table S6**

For each HD variant tested with the ZF10 Library: the top 1000 most frequently recovered binding site sequences (including ties) and the number of sequences incorporated into each MEME motif.

**Supplemental Table S7**

Statistical analysis of the association of selected determinants with specific triplet subsets.

**Supplemental Table S8**

List of validated HD variants that associate with novel and previously determined specificity determinants.

**Supplemental Table S9**

Random Forest refinement models evaluated in this study.

**Supplemental Table S10**

Sequence introduced into pB1H2ω2-12En between NotI and XbaI to create pB1H2ω2-12En(SB) for cloning the HD library.

**Supplemental Table S11**

Oligonucleotide sequences cloned into pB1H2ω2-12En(SB) to generate variants for characterization.

**Supplemental Dataset S1**

Predicted recognition motifs for homeodomains within the human genome at stormo.wustl.edu/PreMoTF.v2.
