# Supplementary material for: Exploring the DNA-recognition potential of homeodomains
Source: HighWire-hosted journal article supplement (doi:10.1101/gr.139014.112), 2012-04-26
Supplement: SupTableS6_new.xlsx [file SupTableS6_new.xlsx]

## Sheet: Sheet1
selected HD residues and DNA triplet used in target site:	1_TTT_RTVAA	2_TTT_RTVSA	4_TTC_VRVSA	5_TTC_TRVAA	6_TTA_VRVAA	7_TTA_RVLRA	8_TGT_RVVSQ	9_TGG_KTTQD	10_TGG_KSVMQ	11_TGA_KSVAQ	12_TGA_RGVAA	13_TCT_ATVKA	14_TCG_KGTQM	15_TCC_RMIKS	17_TAT_TRVSA	18_TAG_RLTQA	19_TAG_RMVSA	20_TAC_QRVSA	21_TAC_ERVSV	22_TAA_RITAA	23_GTT_GTRAY	24_GTG_HLIQY	25_GTA_YTRQV	26_GGT_ALKNM	27_GGT_LTKDQ	28_GGG_RSKER	29_GGC_TLKNQ	30_GGA_LAKDQ	31_GCT_KITKF	32_GCC_VRLKY	33_GCA_ALRQQ	34_GAT_RTMRY	35_GAG_VMRWY	36_GAC_ATRRF.2658.1	37_GAA_RFQKF	38_CTA_LHYAK	39_CTA_IFNAK	40_CGG_STRER	41_CGC_RVMSR	42_CGA_TFYAA	43_CCT_MTNGK	44_CCT_RGDSK	45_CCG_RCYEK	46_CCC_RLDSK	47_CCA_KMTQK	48_CCA_EHNAK	49_CAT_LSQSR	51_CAG_MSHWR	52_CAC_LGMRR
Number of sequences incorporated into each MEME motif:	1063	966	1025	971	1050	985	989	813	981	1035	956	986	918	1060	1007	953	1024	1023	1001	894	1036	1077	1017	936	986	993	999	1045	977	1037	1032	970	1037	999	910	1103	1093	1787	1065	1792	958	885	879	1017	949	986	975	1030	1010
Number of input sequences into MEME:	1112	1041	1081	1035	1122	1020	1008	1021	1058	1059	1006	1004	1178	1097	1101	1000	1067	1049	1001	1007	1049	1107	1026	1028	1028	1008	1060	1052	1002	1057	1041	1007	1052	3010	1038	1161	1145	2346	1080	2081	1023	1059	1041	1369	1005	1017	1003	1063	1067
last 2 numbers in header indicate the number of reads and rank	>1_TTT_RTVAA.3921.1	>2_TTT_RTVSA.17133.1	>4_TTC_VRVSA.6645.1	>5_TTC_TRVAA.20441.1	>6_TTA_VRVAA.3212.1	>7_TTA_RVLRA.2490.1	>8_TGT_RVVSQ.1823.1	>9_TGG_KTTQD.22200.1	>10_TGG_KSVMQ.23398.1	>11_TGA_KSVAQ.4326.1	>12_TGA_RGVAA.8500.1	>13_TCT_ATVKA.9591.1	>14_TCG_KGTQM.48301.1	>15_TCC_RMIKS.3510.1	>17_TAT_TRVSA.34370.1	>18_TAG_RLTQA.18022.1	>19_TAG_RMVSA.11167.1	>20_TAC_QRVSA.5036.1	>21_TAC_ERVSV.4623.1	>22_TAA_RITAA.28700.1	>23_GTT_GTRAY.2084.1	>24_GTG_HLIQY.2170.1	>25_GTA_YTRQV.997.1	>26_GGT_ALKNM.43651.1	>27_GGT_LTKDQ.15769.1	>28_GGG_RSKER.6611.1	>29_GGC_TLKNQ.4557.1	>30_GGA_LAKDQ.3353.1	>31_GCT_KITKF.3985.1	>32_GCC_VRLKY.4511.1	>33_GCA_ALRQQ.1097.1	>34_GAT_RTMRY.6755.1	>35_GAG_VMRWY.1953.1	>36_GAC_ATRRF.2658.1	>37_GAA_RFQKF.28138.1	>38_CTA_LHYAK.5591.1	>39_CTA_IFNAK.4070.1	>40_CGG_STRER.7554.1	>41_CGC_RVMSR.2830.1	>42_CGA_TFYAA.3735.1	>43_CCT_MTNGK.22875.1	>44_CCT_RGDSK.21574.1	>45_CCG_RCYEK.30920.1	>46_CCC_RLDSK.53094.1	>47_CCA_KMTQK.22525.1	>48_CCA_EHNAK.8838.1	>49_CAT_LSQSR.11847.1	>51_CAG_MSHWR.3728.1	>52_CAC_LGMRR.7982.1
	NNGTCCAGATTGNN	NNGTCCAGATTGNN	NNGTCCAGATTGNN	NNGTCCAGATTGNN	NNCTAATTATGANN	NNGTCCAGATTGNN	NNCGCATTAGTGNN	NNGTCCAGATTGNN	NNGTCCAGATTGNN	NNCTCATTAGTGNN	NNGTCCAGATTGNN	NNGTCCAGATTGNN	NNGTCCAGATTGNN	NNTGCGCATCGANN	NNGTCCAGATTGNN	NNGTCCAGATTGNN	NNGTCCAGATTGNN	NNCGCATTAGTGNN	NNCGCATTAGCANN	NNGTCCAGATTGNN	NNTTGGGTACAANN	NNGTCCAGATTGNN	NNTGCCTAAGTANN	NNGTCCAGATTGNN	NNGTCCAGATTGNN	NNCCCCTTAGTANN	NNGCGCCTTAAGNN	NNCTCCTTAGCANN	NNGTCCAGATTGNN	NNGTCCAGATTGNN	NNGTCCAGATTGNN	NNGTCCAGATTGNN	NNGTCCAGATTGNN	NNCGTCTTAACGNN	NNGTCCAGATTGNN	NNGTCCAGATTGNN	NNACTCGTTAAGNN	NNGTCCAGATTGNN	NNGTCCAGATTGNN	NNACTCGTTAAGNN	NNGTCCAGATTGNN	NNGTCCAGATTGNN	NNGTCCAGATTGNN	NNGTCCAGATTGNN	NNGTCCAGATTGNN	NNGTCCAGATTGNN	NNGTCCAGATTGNN	NNGTCCAGATTGNN	NNGTCCAGATTGNN
	>1_TTT_RTVAA.2371.2	>2_TTT_RTVSA.4428.2	>4_TTC_VRVSA.2157.2	>5_TTC_TRVAA.3631.2	>6_TTA_VRVAA.2757.2	>7_TTA_RVLRA.1829.2	>8_TGT_RVVSQ.1280.2	>9_TGG_KTTQD.4840.2	>10_TGG_KSVMQ.3740.2	>11_TGA_KSVAQ.3050.2	>12_TGA_RGVAA.5734.2	>13_TCT_ATVKA.6509.2	>14_TCG_KGTQM.20256.2	>15_TCC_RMIKS.2513.2	>17_TAT_TRVSA.7815.2	>18_TAG_RLTQA.2976.2	>19_TAG_RMVSA.1825.2	>20_TAC_QRVSA.3974.2	>21_TAC_ERVSV.3620.2	>22_TAA_RITAA.3671.2	>23_GTT_GTRAY.1547.2	>24_GTG_HLIQY.904.2	>25_GTA_YTRQV.996.2	>26_GGT_ALKNM.7291.2	>27_GGT_LTKDQ.8728.2	>28_GGG_RSKER.6109.2	>29_GGC_TLKNQ.3562.2	>30_GGA_LAKDQ.2565.2	>31_GCT_KITKF.2774.2	>32_GCC_VRLKY.2207.2	>33_GCA_ALRQQ.556.2	>34_GAT_RTMRY.3304.2	>35_GAG_VMRWY.1057.2	>36_GAC_ATRRF.2420.2	>37_GAA_RFQKF.2407.2	>38_CTA_LHYAK.3246.2	>39_CTA_IFNAK.3861.2	>40_CGG_STRER.7412.2	>41_CGC_RVMSR.2300.2	>42_CGA_TFYAA.2697.2	>43_CCT_MTNGK.13917.2	>44_CCT_RGDSK.14173.2	>45_CCG_RCYEK.5989.2	>46_CCC_RLDSK.34601.2	>47_CCA_KMTQK.6031.2	>48_CCA_EHNAK.7186.2	>49_CAT_LSQSR.3437.2	>51_CAG_MSHWR.3541.2	>52_CAC_LGMRR.7805.2
	NNTGCGCATCGANN	NNTGCGCATCGANN	NNCGCATTAGTGNN	NNTGCGCATCGANN	NNCTCATTAGTGNN	NNTTATTAATTANN	NNTCTGCTAATGNN	NNGCCCATTAACNN	NNTGCGCATCGANN	NNCTCATTAATGNN	NNTGCGCATCGANN	NNTGCGCATCGANN	NNTGCGCATCGANN	NNCGGATTAGTGNN	NNTGCGCATCGANN	NNCCAATTAATANN	NNCGCATTAGTGNN	NNCGTATTAGTGNN	NNCGTATTAGTGNN	NNCTCATTAGTGNN	NNCTACTTAGGANN	NNTGCGCATCGANN	NNCTACTTAACGNN	NNTGCGCATCGANN	NNCTCCTTAGCANN	NNCCCCTTAAANN	NNTCGCCTTAAGNN	NNCTCCTTAACANN	NNCGTCTTAAGCNN	NNTGCTTAAGCCNN	NNTTCCTAAGTANN	NNCGTCTTAACGNN	NNCCTCTTATGANN	NNCGTCTTAGGANN	NNTGCGCATCGANN	NNCTAGTTAGCANN	NNACTAGTTAACNN	NNTGCGCATCGANN	NNTGCGCATCGANN	NNGTCCAGATTGNN	NNTGCGCATCGANN	NNCGCGTTATTGNN	NNTCCTGACAGTNN	NNTGCGCATCGANN	NNGCTGGTTAACNN	NNGATGGTTAAANN	NNTGCGCATCGANN	NNTGCGCATCGANN	NNCCGTGTTAGTNN
	>1_TTT_RTVAA.1048.3	>2_TTT_RTVSA.1791.3	>4_TTC_VRVSA.1960.3	>5_TTC_TRVAA.1392.3	>6_TTA_VRVAA.2739.3	>7_TTA_RVLRA.1653.3	>8_TGT_RVVSQ.1232.3	>9_TGG_KTTQD.4735.3	>10_TGG_KSVMQ.2889.3	>11_TGA_KSVAQ.2510.3	>12_TGA_RGVAA.5008.3	>13_TCT_ATVKA.6070.3	>14_TCG_KGTQM.7900.3	>15_TCC_RMIKS.2347.3	>17_TAT_TRVSA.3295.3	>18_TAG_RLTQA.2286.3	>19_TAG_RMVSA.1233.3	>20_TAC_QRVSA.2346.3	>21_TAC_ERVSV.3168.3	>22_TAA_RITAA.3486.3	>23_GTT_GTRAY.1461.3	>24_GTG_HLIQY.542.3	>25_GTA_YTRQV.928.3	>26_GGT_ALKNM.3858.3	>27_GGT_LTKDQ.8712.3	>28_GGG_RSKER.6052.3	>29_GGC_TLKNQ.2927.3	>30_GGA_LAKDQ.2110.3	>31_GCT_KITKF.1688.3	>32_GCC_VRLKY.1367.3	>33_GCA_ALRQQ.506.3	>34_GAT_RTMRY.2529.3	>35_GAG_VMRWY.1009.3	>36_GAC_ATRRF.1968.3	>37_GAA_RFQKF.2196.3	>38_CTA_LHYAK.2949.3	>39_CTA_IFNAK.3788.3	>40_CGG_STRER.928.3	>41_CGC_RVMSR.2165.3	>42_CGA_TFYAA.2469.3	>43_CCT_MTNGK.4195.3	>44_CCT_RGDSK.4745.3	>45_CCG_RCYEK.5869.3	>46_CCC_RLDSK.4895.3	>47_CCA_KMTQK.5318.3	>48_CCA_EHNAK.6412.3	>49_CAT_LSQSR.2989.3	>51_CAG_MSHWR.1901.3	>52_CAC_LGMRR.4030.3
	NNGCTAATTAATNN	NNCGCATTAGTGNN	NNTGCGCATCGANN	NNTGCTTAATTANN	NNCTAATTAATGNN	NNGCTAATTAATNN	NNTTTGCTAATGNN	NNCCCATTAATANN	NNCTCATTAGTGNN	NNTTCATTAGTGNN	NNTACATAATGANN	NNCGGATTAGTGNN	NNCCCATTAATANN	NNGTCCAGATTGNN	NNTACATAATGANN	NNCCAATTAAAANN	NNCGCATTAATANN	NNCGCATTAGCANN	NNCGCATTAGTGNN	NNCTAATTAGCANN	NNCTACTTAACANN	NNCCCACTTAATNN	NNACCCTAAGTANN	NNGCGCCTTAAGNN	NNCTCCTTAATANN	NNCCCCTTAATGNN	NNCGCCTTAGTGNN	NNCTCCTTAATTNN	NNCGGCTTAATGNN	NNTGCGCATCGANN	NNTGCCTAAGTANN	NNCGTCTTAGGANN	NNTGCGCATCGANN	NNCGTCTTAGAGNN	NNGGTTCTTAAGNN	NNCTAGTTAGTGNN	NNGCTCGTTAAGNN	NNCCCGTTAAGGNN	NNCCGTGTTAGTNN	NNGCTCGTTAAGNN	NNGTTGGTTAAANN	NNTCGGGTTAAGNN	NNCTGGTTAATGNN	NNCCCCAACGTANN	NNCTAGTTAGCANN	NNGCTGGTTACANN	NNCCGTGTTAGTNN	NNCCTGTTAAGANN	NNTGCGCATCGANN
	>1_TTT_RTVAA.939.4	>2_TTT_RTVSA.1280.4	>4_TTC_VRVSA.1459.4	>5_TTC_TRVAA.1344.4	>6_TTA_VRVAA.2606.4	>7_TTA_RVLRA.1590.4	>8_TGT_RVVSQ.915.4	>9_TGG_KTTQD.4266.4	>10_TGG_KSVMQ.2515.4	>11_TGA_KSVAQ.2357.4	>12_TGA_RGVAA.3518.4	>13_TCT_ATVKA.2684.4	>14_TCG_KGTQM.3857.4	>15_TCC_RMIKS.1379.4	>17_TAT_TRVSA.2867.4	>18_TAG_RLTQA.1649.4	>19_TAG_RMVSA.1064.4	>20_TAC_QRVSA.2336.4	>21_TAC_ERVSV.2408.4	>22_TAA_RITAA.3044.4	>23_GTT_GTRAY.1309.4	>24_GTG_HLIQY.539.4	>25_GTA_YTRQV.901.4	>26_GGT_ALKNM.3715.4	>27_GGT_LTKDQ.7631.4	>28_GGG_RSKER.4924.4	>29_GGC_TLKNQ.2817.4	>30_GGA_LAKDQ.1999.4	>31_GCT_KITKF.1341.4	>32_GCC_VRLKY.1176.4	>33_GCA_ALRQQ.500.4	>34_GAT_RTMRY.2339.4	>35_GAG_VMRWY.670.4	>36_GAC_ATRRF.1615.4	>37_GAA_RFQKF.2048.4	>38_CTA_LHYAK.1915.4	>39_CTA_IFNAK.3223.4	>40_CGG_STRER.849.4	>41_CGC_RVMSR.768.4	>42_CGA_TFYAA.2346.4	>43_CCT_MTNGK.2552.4	>44_CCT_RGDSK.3362.4	>45_CCG_RCYEK.5868.4	>46_CCC_RLDSK.4374.4	>47_CCA_KMTQK.4129.4	>48_CCA_EHNAK.6254.4	>49_CAT_LSQSR.1227.4	>51_CAG_MSHWR.1413.4	>52_CAC_LGMRR.3060.4
	NNCTAATTAGGGNN	NNCGCATTAATANN	NNCGTATTAGTGNN	NNGCTAATTAATNN	NNCTAATTACGANN	NNTGCTTAATTANN	NNCGCATTAGCANN	NNTCCTGACAGTNN	NNGCCATTAGTANN	NNCTCATTAAGANN	NNCTCATTAGTGNN	NNCGGATTAATGNN	NNCCCATTAATGNN	NNGGGGATTAACNN	NNCGTATTAGTGNN	NNGCTAATTAATNN	NNGCTAATTAATNN	NNCGCATTAATANN	NNCGCATTAAAGNN	NNCTAATTATGANN	NNGTCCAGATTGNN	NNGCGCTACGTANN	NNCTACTTAGGANN	NNGCACCTTAAANN	NNCTCCTTAACANN	NNTCCCCTTAACNN	NNGCACCTTAAGNN	NNCTCCTTAACGNN	NNCGTCTTAGGANN	NNGAAAAAACTGNN	NNACCCTAAGTANN	NNCGTCTTAGTGNN	NNCCTCTTAACANN	NNCGTCTTAATANN	NNGCTTCTTAAANN	NNCCTAGTTAAANN	NNGGTAGTTAAANN	NNCCCGTTAAGNN	NNCGCGTTAGTGNN	NNGCTCGTTAATNN	NNCCTGGTTAAGNN	NNTCGGGTTAGANN	NNATCAGTCCTTNN	NNGCGGGTTAACNN	NNCTAGTTAAGGNN	NNGCTGGTTAACNN	NNGCCCTTAACANN	NNCCTGTTAATGNN	NNGCGTGTTAACNN
	>1_TTT_RTVAA.858.5	>2_TTT_RTVSA.1156.5	>4_TTC_VRVSA.1127.5	>5_TTC_TRVAA.1153.5	>6_TTA_VRVAA.2325.5	>7_TTA_RVLRA.1399.5	>8_TGT_RVVSQ.891.5	>9_TGG_KTTQD.4066.5	>10_TGG_KSVMQ.1725.5	>11_TGA_KSVAQ.2180.5	>12_TGA_RGVAA.2739.5	>13_TCT_ATVKA.1973.5	>14_TCG_KGTQM.3386.5	>15_TCC_RMIKS.1280.5	>17_TAT_TRVSA.2858.5	>18_TAG_RLTQA.1446.5	>19_TAG_RMVSA.790.5	>20_TAC_QRVSA.1892.5	>21_TAC_ERVSV.2389.5	>22_TAA_RITAA.2844.5	>23_GTT_GTRAY.1298.5	>24_GTG_HLIQY.521.5	>25_GTA_YTRQV.894.5	>26_GGT_ALKNM.3630.5	>27_GGT_LTKDQ.6159.5	>28_GGG_RSKER.4226.5	>29_GGC_TLKNQ.2700.5	>30_GGA_LAKDQ.1973.5	>31_GCT_KITKF.1162.5	>32_GCC_VRLKY.888.5	>33_GCA_ALRQQ.483.5	>34_GAT_RTMRY.2088.5	>35_GAG_VMRWY.637.5	>36_GAC_ATRRF.1350.5	>37_GAA_RFQKF.1710.5	>38_CTA_LHYAK.1911.5	>39_CTA_IFNAK.3047.5	>40_CGG_STRER.770.5	>41_CGC_RVMSR.746.5	>42_CGA_TFYAA.1793.5	>43_CCT_MTNGK.2344.5	>44_CCT_RGDSK.3326.5	>45_CCG_RCYEK.5738.5	>46_CCC_RLDSK.3889.5	>47_CCA_KMTQK.3185.5	>48_CCA_EHNAK.4724.5	>49_CAT_LSQSR.1205.5	>51_CAG_MSHWR.1381.5	>52_CAC_LGMRR.2898.5
	NNGCTAATTAACNN	NNCCGTGTTAGTNN	NNCGCATTAATANN	NNCTAATTATGANN	NNCTAATTAGCANN	NNTGCGCATCGANN	NNCGCATTAATANN	NNCCCATTATGANN	NNCTCATTAATGNN	NNGCTAATTAATNN	NNCTAATTAGGGNN	NNGTGTTAATCCNN	NNCCCATTAGTANN	NNCGGATTAATGNN	NNCGCATTAGTGNN	NNCCAATTAGCANN	NNCGCATTAACANN	NNGTCCAGATTGNN	NNCGCATTAACANN	NNCTAATTAGGGNN	NNTGCCTAAGTANN	NNCCACTTAAGANN	NNGGTCTAAGTANN	NNGCACCTTAAGNN	NNCTCCTTAAAGNN	NNCCCCTTAGGGNN	NNGCGCCTTACGNN	NNCTCCTTAATANN	NNCGTCTTAACGNN	NNTTCTTAAGCCNN	NNTTTCTAAGTANN	NNCGTCTTAATGNN	NNGCCTCTTCAANN	NNCGTCTTAAGCNN	NNAGTTCTTAAGNN	NNTGCGCATCGANN	NNGCTCGTTAATNN	NNCCCGTTAATGNN	NNGCGTGTTAACNN	NNACTCGTTAGANN	NNCTGGTTAAGANN	NNTCGGGTTAACNN	NNCTGGTTAAGANN	NNATCAGTCCTTNN	NNCTAGTTAGTANN	NNGGTGGTTAACNN	NNGCGTGTTAACNN	NNCCTGTTAGGGNN	NNGTGTGTTAACNN
	>1_TTT_RTVAA.834.6	>2_TTT_RTVSA.776.6	>4_TTC_VRVSA.1100.6	>5_TTC_TRVAA.1139.6	>6_TTA_VRVAA.2312.6	>7_TTA_RVLRA.1319.6	>8_TGT_RVVSQ.859.6	>9_TGG_KTTQD.3700.6	>10_TGG_KSVMQ.1674.6	>11_TGA_KSVAQ.2058.6	>12_TGA_RGVAA.2730.6	>13_TCT_ATVKA.1696.6	>14_TCG_KGTQM.3335.6	>15_TCC_RMIKS.984.6	>17_TAT_TRVSA.2483.6	>18_TAG_RLTQA.1413.6	>19_TAG_RMVSA.688.6	>20_TAC_QRVSA.1877.6	>21_TAC_ERVSV.2000.6	>22_TAA_RITAA.2132.6	>23_GTT_GTRAY.1165.6	>24_GTG_HLIQY.498.6	>25_GTA_YTRQV.792.6	>26_GGT_ALKNM.2515.6	>27_GGT_LTKDQ.5349.6	>28_GGG_RSKER.4011.6	>29_GGC_TLKNQ.2684.6	>30_GGA_LAKDQ.1916.6	>31_GCT_KITKF.1149.6	>32_GCC_VRLKY.638.6	>33_GCA_ALRQQ.438.6	>34_GAT_RTMRY.1631.6	>35_GAG_VMRWY.520.6	>36_GAC_ATRRF.1320.6	>37_GAA_RFQKF.1680.6	>38_CTA_LHYAK.1897.6	>39_CTA_IFNAK.2375.6	>40_CGG_STRER.756.6	>41_CGC_RVMSR.725.6	>42_CGA_TFYAA.1546.6	>43_CCT_MTNGK.2218.6	>44_CCT_RGDSK.3078.6	>45_CCG_RCYEK.5079.6	>46_CCC_RLDSK.2769.6	>47_CCA_KMTQK.3137.6	>48_CCA_EHNAK.4601.6	>49_CAT_LSQSR.1118.6	>51_CAG_MSHWR.1337.6	>52_CAC_LGMRR.2408.6
	NNCTAATTAGCANN	NNCGTATTAGTGNN	NNTCCCAACCCCNN	NNTTATTAATTANN	NNCTAATTAAGTNN	NNCTAATTAATGNN	NNCGCATTAATGNN	NNCCCATTAGAGNN	NNTCCATTAGTGNN	NNCTCATTAGTANN	NNCTAATTAGCANN	NNTGGTTAATCCNN	NNCCCATTAAGANN	NNGTGTTAATCCNN	NNCGCATTAATANN	NNCTTGTTAAGANN	NNCGCATTAGCANN	NNCGTATTAGTANN	NNCGCATTAATGNN	NNGCTAATTAATNN	NNACCTTAAGTANN	NNCCACTTAGAANN	NNCTACTTAGTANN	NNTCCTGACAGTNN	NNCTCCTTAAGGNN	NNGTCCAGATTGNN	NNGCGCCTTAGCNN	NNTTCCTTAAGGNN	NNCGGCTTATGANN	NNTGGTTAAGCCNN	NNACCTTAAGTANN	NNCGTCTTAAGANN	NNCCTCTTAGAGNN	NNCGTCTTAACNN	NNGGTTCTTAAANN	NNCTAGTTAGTANN	NNGTCCAGATTGNN	NNGCCCGTTAAGNN	NNGCGTGTTAAGNN	NNTGCGCATCGANN	NNCCTGGTTAAANN	NNTCGGGTTAAANN	NNTGCGCATCGANN	NNTCGGGTTAAGNN	NNGCTGGTTACANN	NNCCTAGTTAATNN	NNCGAGTTAACANN	NNCTGTTAGCTNN	NNGTGTGTTAAGNN
	>1_TTT_RTVAA.685.7	>2_TTT_RTVSA.668.7	>4_TTC_VRVSA.907.7	>5_TTC_TRVAA.1096.7	>6_TTA_VRVAA.2287.7	>7_TTA_RVLRA.1155.7	>8_TGT_RVVSQ.856.7	>9_TGG_KTTQD.3291.7	>10_TGG_KSVMQ.1653.7	>11_TGA_KSVAQ.1969.7	>12_TGA_RGVAA.2666.7	>13_TCT_ATVKA.1562.7	>14_TCG_KGTQM.3225.7	>15_TCC_RMIKS.807.7	>17_TAT_TRVSA.1961.7	>18_TAG_RLTQA.1226.7	>19_TAG_RMVSA.614.7	>20_TAC_QRVSA.1850.7	>21_TAC_ERVSV.1931.7	>22_TAA_RITAA.2086.7	>23_GTT_GTRAY.1107.7	>24_GTG_HLIQY.487.7	>25_GTA_YTRQV.758.7	>26_GGT_ALKNM.1681.7	>27_GGT_LTKDQ.4973.7	>28_GGG_RSKER.3998.7	>29_GGC_TLKNQ.2470.7	>30_GGA_LAKDQ.1708.7	>31_GCT_KITKF.1067.7	>32_GCC_VRLKY.629.7	>33_GCA_ALRQQ.423.7	>34_GAT_RTMRY.1564.7	>35_GAG_VMRWY.519.7	>36_GAC_ATRRF.1234.7	>37_GAA_RFQKF.1417.7	>38_CTA_LHYAK.1686.7	>39_CTA_IFNAK.2299.7	>40_CGG_STRER.691.7	>41_CGC_RVMSR.660.7	>42_CGA_TFYAA.1522.7	>43_CCT_MTNGK.1645.7	>44_CCT_RGDSK.3029.7	>45_CCG_RCYEK.4365.7	>46_CCC_RLDSK.2631.7	>47_CCA_KMTQK.3133.7	>48_CCA_EHNAK.4395.7	>49_CAT_LSQSR.1024.7	>51_CAG_MSHWR.1263.7	>52_CAC_LGMRR.2213.7
	NNCTAATTAAGGNN	NNATCAGTCCTTNN	NNCGCATTAGCANN	NNTCCTGACAGTNN	NNCTAATTAGGGNN	NNCTAATTATGANN	NNGTTGCTAATGNN	NNCCCATTAATGNN	NNCTCATTAGTANN	NNCTCATTAGCGNN	NNCTAATTATGANN	NNCGGATTAACANN	NNGGTTTTGGTCNN	NNGGATTAGTANN	NNCCGTGTTAGTNN	NNCCAATTAGTGNN	NNCGTATTAGTGNN	NNCGCATTAAAGNN	NNCGCATTAGCGNN	NNTGCGCATCGANN	NNACCCTAAGTANN	NNCCCTTAAGTGNN	NNACCTTAAGTANN	NNGCGCCTTAATNN	NNCTCCTTAAGCNN	NNCCCCTTAGTGNN	NNACGCCTTAACNN	NNCTCCTTAGGNN	NNCGTCTTAATANN	NNTACTTAAGCCNN	NNGGTCTAAGTANN	NNCGTCTTAGAGNN	NNCCTCTCCATANN	NNCGTCTTAAAANN	NNGCTACTTATCNN	NNCTAGTTAAGANN	NNTTGGGTACAANN	NNCCCGTTAAGANN	NNCGCGTTAACGNN	NNGCTCGTTAGANN	NNCTGGTTAGTANN	NNCGGGTTAATANN	NNTCGGTTAACANN	NNTCGGGTTAGANN	NNCTAGTTAGTGNN	NNGCTGGTTAAANN	NNTCCGTTAACANN	NNCCTGTTAAATNN	NNGCGTGTTAAANN
	>1_TTT_RTVAA.656.8	>2_TTT_RTVSA.637.8	>4_TTC_VRVSA.834.8	>5_TTC_TRVAA.1015.8	>6_TTA_VRVAA.2133.8	>7_TTA_RVLRA.1140.8	>8_TGT_RVVSQ.784.8	>9_TGG_KTTQD.2907.8	>10_TGG_KSVMQ.1614.8	>11_TGA_KSVAQ.1940.8	>12_TGA_RGVAA.2539.8	>13_TCT_ATVKA.1375.8	>14_TCG_KGTQM.1942.8	>15_TCC_RMIKS.707.8	>17_TAT_TRVSA.1532.8	>18_TAG_RLTQA.1145.8	>19_TAG_RMVSA.567.8	>20_TAC_QRVSA.1748.8	>21_TAC_ERVSV.1787.8	>22_TAA_RITAA.1895.8	>23_GTT_GTRAY.1067.8	>24_GTG_HLIQY.481.8	>25_GTA_YTRQV.734.8	>26_GGT_ALKNM.1496.8	>27_GGT_LTKDQ.4250.8	>28_GGG_RSKER.3944.8	>29_GGC_TLKNQ.2285.8	>30_GGA_LAKDQ.1668.8	>31_GCT_KITKF.902.8	>32_GCC_VRLKY.620.8	>33_GCA_ALRQQ.420.8	>34_GAT_RTMRY.1421.8	>35_GAG_VMRWY.518.8	>36_GAC_ATRRF.1200.8	>37_GAA_RFQKF.1368.8	>38_CTA_LHYAK.1559.8	>39_CTA_IFNAK.1676.8	>40_CGG_STRER.655.8	>41_CGC_RVMSR.603.8	>42_CGA_TFYAA.1466.8	>43_CCT_MTNGK.1383.8	>44_CCT_RGDSK.2623.8	>45_CCG_RCYEK.4313.8	>46_CCC_RLDSK.2354.8	>47_CCA_KMTQK.2675.8	>48_CCA_EHNAK.3481.8	>49_CAT_LSQSR.997.8	>51_CAG_MSHWR.1177.8	>52_CAC_LGMRR.1772.8
	NNTACATAATGANN	NNCTAATTAATGNN	NNCCGTGTTAGTNN	NNCTAATTAGCGNN	NNCTAATTAGGTNN	NNCTCATTAGTGNN	NNCCCCTTAATGNN	NNTGCGCATCGANN	NNCGCATTAGTGNN	NNCTCATTATTANN	NNCTAATTAATGNN	NNTCGGATTAAGNN	NNCCCATTATGANN	NNGAGGATTATCNN	NNCGCATTAGCANN	NNCCAATTAGAGNN	NNCTAATTAATGNN	NNCGCATTAACANN	NNCGTATTAAANN	NNCTAATTAATGNN	NNTTTCTAAGTANN	NNTACTTAAGTGNN	NNACTCTAAGTANN	NNCGCCTTAGTGNN	NNCTCCTTAGTANN	NNCCCCTTAATANN	NNTCGCCTTAACNN	NNTTCCTTAGTANN	NNCGTCTTAGTGNN	NNGACTTAAGCCNN	NNCGTTTAAGTANN	NNTGTCTTAAGANN	NNCCTCTTAGTANN	NNCGTCTTAATGNN	NNGGTTCTTAACNN	NNTCTAGTTAAANN	NNACTAGTTATCNN	NNCCGTTAAAGNN	NNCGCGTTAAGGNN	NNGCTCGTTATANN	NNGTTGGTTAAGNN	NNCGGGTTAACGNN	NNCTGGTTAGTANN	NNTCCTGACAGTNN	NNTCGTTAACTANN	NNGATGGTTATCNN	NNCTTGTTAACANN	NNCCTGTTAAAGNN	NNGTGTGTCAACNN
	>1_TTT_RTVAA.645.9	>2_TTT_RTVSA.593.9	>4_TTC_VRVSA.598.9	>5_TTC_TRVAA.1003.9	>6_TTA_VRVAA.2053.9	>7_TTA_RVLRA.1130.9	>8_TGT_RVVSQ.763.9	>9_TGG_KTTQD.2813.9	>10_TGG_KSVMQ.1532.9	>11_TGA_KSVAQ.1874.9	>12_TGA_RGVAA.2506.9	>13_TCT_ATVKA.1235.9	>14_TCG_KGTQM.1455.9	>15_TCC_RMIKS.690.9	>17_TAT_TRVSA.1184.9	>18_TAG_RLTQA.928.9	>19_TAG_RMVSA.565.9	>20_TAC_QRVSA.1511.9	>21_TAC_ERVSV.1786.9	>22_TAA_RITAA.1726.9	>23_GTT_GTRAY.1051.9	>24_GTG_HLIQY.443.9	>25_GTA_YTRQV.688.9	>26_GGT_ALKNM.1304.9	>27_GGT_LTKDQ.4216.9	>28_GGG_RSKER.3724.9	>29_GGC_TLKNQ.2283.9	>30_GGA_LAKDQ.1645.9	>31_GCT_KITKF.734.9	>32_GCC_VRLKY.612.9	>33_GCA_ALRQQ.414.9	>34_GAT_RTMRY.1382.9	>35_GAG_VMRWY.508.9	>36_GAC_ATRRF.1131.9	>37_GAA_RFQKF.1293.9	>38_CTA_LHYAK.1554.9	>39_CTA_IFNAK.1386.9	>40_CGG_STRER.655.9	>41_CGC_RVMSR.578.9	>42_CGA_TFYAA.1245.9	>43_CCT_MTNGK.1289.9	>44_CCT_RGDSK.2268.9	>45_CCG_RCYEK.3380.9	>46_CCC_RLDSK.2353.9	>47_CCA_KMTQK.2353.9	>48_CCA_EHNAK.3021.9	>49_CAT_LSQSR.967.9	>51_CAG_MSHWR.1062.9	>52_CAC_LGMRR.1655.9
	NNCTAATTATGANN	NNCTCATTAATGNN	NNCGTATTAAGTNN	NNGTGTTAATTANN	NNCTAATTACAANN	NNGTGTTAATTANN	NNACTGCTAATGNN	NNCCCATTAAGANN	NNCCCATTAATANN	NNCTCATTATGANN	NNCTAATTAGCGNN	NNGAGTTAATCCNN	NNCCCATTAAGGNN	NNGCGGATTAAGNN	NNCGTATTAATANN	NNCCAATTATGANN	NNCTCATTAATGNN	NNCGCATTAATGNN	NNCGTATTAAGTNN	NNGCTAATTAACNN	NNTTCTTAAGTANN	NNGCCACTTAACNN	NNCTACTTAACANN	NNGCGCCTTAGGNN	NNTTCCTTAAGGNN	NNGCCCCTTAACNN	NNGCGCCTTATGNN	NNTTCCTTAATANN	NNCGTCTTAATGNN	NNGGTTTAAGCCNN	NNTTCTTAAGTANN	NNCGTCTTAATANN	NNGCCTCTTATGNN	NNCGTCTTAGTGNN	NNGCTACTTAAGNN	NNGCTAGTTAGTNN	NNCCTAGTTAAGNN	NNTCCGTTAGCANN	NNCGTGTTAATGNN	NNACTCGTTAATNN	NNGCAGGTTAAANN	NNGCGGGTTAAANN	NNCTGGTTAGTGNN	NNCCGTGTTAGTNN	NNGATGGTTAAGNN	NNTCTGGTTAACNN	NNGCGTGTTAAANN	NNGCCTGTTAGTNN	NNGCGTGTTAAGNN
	>1_TTT_RTVAA.633.10	>2_TTT_RTVSA.574.10	>4_TTC_VRVSA.589.10	>5_TTC_TRVAA.960.10	>6_TTA_VRVAA.2048.10	>7_TTA_RVLRA.1100.10	>8_TGT_RVVSQ.762.10	>9_TGG_KTTQD.2160.10	>10_TGG_KSVMQ.1257.10	>11_TGA_KSVAQ.1846.10	>12_TGA_RGVAA.2368.10	>13_TCT_ATVKA.1229.10	>14_TCG_KGTQM.1422.10	>15_TCC_RMIKS.636.10	>17_TAT_TRVSA.990.10	>18_TAG_RLTQA.904.10	>19_TAG_RMVSA.525.10	>20_TAC_QRVSA.1366.10	>21_TAC_ERVSV.1459.10	>22_TAA_RITAA.1723.10	>23_GTT_GTRAY.996.10	>24_GTG_HLIQY.443.10	>25_GTA_YTRQV.666.10	>26_GGT_ALKNM.1291.10	>27_GGT_LTKDQ.3728.10	>28_GGG_RSKER.3678.10	>29_GGC_TLKNQ.2272.10	>30_GGA_LAKDQ.1615.10	>31_GCT_KITKF.688.10	>32_GCC_VRLKY.587.10	>33_GCA_ALRQQ.397.10	>34_GAT_RTMRY.1180.10	>35_GAG_VMRWY.506.10	>36_GAC_ATRRF.1035.10	>37_GAA_RFQKF.912.10	>38_CTA_LHYAK.1554.10	>39_CTA_IFNAK.1386.10	>40_CGG_STRER.647.10	>41_CGC_RVMSR.536.10	>42_CGA_TFYAA.1204.10	>43_CCT_MTNGK.1110.10	>44_CCT_RGDSK.2182.10	>45_CCG_RCYEK.3162.10	>46_CCC_RLDSK.2069.10	>47_CCA_KMTQK.2303.10	>48_CCA_EHNAK.2990.10	>49_CAT_LSQSR.960.10	>51_CAG_MSHWR.964.10	>52_CAC_LGMRR.1530.10
	NNCTCATTAGTGNN	NNCGCATTAATGNN	NNCGCATTATGGNN	NNCTAATTAGCANN	NNCTAATTAATANN	NNCTAATTAGGGNN	NNCCTGCTAATGNN	NNGCCCATTATANN	NNCCCATTAATGNN	NNCTCATTAAANN	NNCTAATTAAGGNN	NNCGGATTAGCGNN	NNCCCATTAGTGNN	NNGGGGATTAAGNN	NNCGTATTAAGTNN	NNGCCAATTAACNN	NNCGCATTAATGNN	NNCGTATTAATANN	NNCGTATTAATCNN	NNCTATTTACAGNN	NNGGTCTAAGTANN	NNCCCACTTACANN	NNGCGCTAAGTANN	NNGCGCCTTACGNN	NNCTCCTTAATTNN	NNACCCCTTAATNN	NNCCGCCTTAAGNN	NNCTCCTTAAGCNN	NNCGTCTTAGAGNN	NNAGCTTAAGCCNN	NNTTACTAAGTANN	NNCGTCTTAAAGNN	NNCCTCTTAAGGNN	NNCGTCTTAGACNN	NNGCTTCTTAAGNN	NNACTAGTTAACNN	NNTCTAGTTAAANN	NNTCCGTTAACANN	NNGCGTGTTAAANN	NNACTCGTTAGTNN	NNGATGGTTAAANN	NNCGGGTTAGTGNN	NNCCTGGTTAAGNN	NNGCGGGTTAATNN	NNGCTGGTTAGANN	NNCTAGTTAGTANN	NNGATGTTAACANN	NNCTGTTTAGANN	NNCCGTGTTAACNN
	>1_TTT_RTVAA.587.11	>2_TTT_RTVSA.554.11	>4_TTC_VRVSA.511.11	>5_TTC_TRVAA.934.11	>6_TTA_VRVAA.1656.11	>7_TTA_RVLRA.1082.11	>8_TGT_RVVSQ.757.11	>9_TGG_KTTQD.1993.11	>10_TGG_KSVMQ.1047.11	>11_TGA_KSVAQ.1502.11	>12_TGA_RGVAA.1980.11	>13_TCT_ATVKA.1208.11	>14_TCG_KGTQM.1372.11	>15_TCC_RMIKS.531.11	>17_TAT_TRVSA.790.11	>18_TAG_RLTQA.892.11	>19_TAG_RMVSA.516.11	>20_TAC_QRVSA.1132.11	>21_TAC_ERVSV.1231.11	>22_TAA_RITAA.1697.11	>23_GTT_GTRAY.888.11	>24_GTG_HLIQY.443.11	>25_GTA_YTRQV.626.11	>26_GGT_ALKNM.1280.11	>27_GGT_LTKDQ.3265.11	>28_GGG_RSKER.3323.11	>29_GGC_TLKNQ.2264.11	>30_GGA_LAKDQ.1407.11	>31_GCT_KITKF.674.11	>32_GCC_VRLKY.446.11	>33_GCA_ALRQQ.389.11	>34_GAT_RTMRY.1179.11	>35_GAG_VMRWY.470.11	>36_GAC_ATRRF.988.11	>37_GAA_RFQKF.883.11	>38_CTA_LHYAK.1437.11	>39_CTA_IFNAK.1358.11	>40_CGG_STRER.646.11	>41_CGC_RVMSR.534.11	>42_CGA_TFYAA.1145.11	>43_CCT_MTNGK.1085.11	>44_CCT_RGDSK.2136.11	>45_CCG_RCYEK.2233.11	>46_CCC_RLDSK.1870.11	>47_CCA_KMTQK.2240.11	>48_CCA_EHNAK.2729.11	>49_CAT_LSQSR.923.11	>51_CAG_MSHWR.913.11	>52_CAC_LGMRR.1517.11
	NNCTAATTAGCGNN	NNCGCATTAGCANN	NNCGAGCTATATNN	NNGCTAATTAACNN	NNCTAATTAGACNN	NNAGCTTAATTANN	NNCGCATTAAAGNN	NNGCCATTAGTANN	NNATCAGTCCTTNN	NNGCTCATTAAGNN	NNGCTAATTAATNN	NNGCGGATTAAGNN	NNTCCATTAGTGNN	NNGCGGATTAATNN	NNCGTATTAGAANN	NNCTAATTAGGGNN	NNCCTATTAATGNN	NNCGCATTATGGNN	NNGCGCATTACANN	NNCTCATTAGTANN	NNACTCTAAGTANN	NNCCCACTTAACNN	NNCGTTTAAGTANN	NNGCGCCTTACANN	NNCTCCTTAACGNN	NNCCCCTTAACANN	NNCGCCTTAAGNN	NNCTCCTTATGANN	NNCTTCTTAGTGNN	NNCGGCTTAATGNN	NNCTACTTAGTANN	NNCGTTCTTTAANN	NNCCTCTCAGCANN	NNCGTCTCAATGNN	NNAACTACTTAAGNN	NNCCTAGTTAATNN	NNGCTAGTTATGNN	NNCCCGTTAATANN	NNCCGTGTTAACNN	NNACTCGTTATGNN	NNGCTGGTTAACNN	NNATCAGTCCTTNN	NNCTGGTTAGAGNN	NNCGGGTTAATANN	NNGCGTTAACCANN	NNCCTAGTTAAGNN	NNGCGTGTTAAGNN	NNGCCTGTTTATNN	NNGTGTGTTAGANN
	>1_TTT_RTVAA.572.12	>2_TTT_RTVSA.532.12	>4_TTC_VRVSA.490.12	>5_TTC_TRVAA.909.12	>6_TTA_VRVAA.1640.12	>7_TTA_RVLRA.1042.12	>8_TGT_RVVSQ.733.12	>9_TGG_KTTQD.1934.12	>10_TGG_KSVMQ.897.12	>11_TGA_KSVAQ.1471.12	>12_TGA_RGVAA.1764.12	>13_TCT_ATVKA.1194.12	>14_TCG_KGTQM.1346.12	>15_TCC_RMIKS.508.12	>17_TAT_TRVSA.703.12	>18_TAG_RLTQA.741.12	>19_TAG_RMVSA.494.12	>20_TAC_QRVSA.1124.12	>21_TAC_ERVSV.1176.12	>22_TAA_RITAA.1688.12	>23_GTT_GTRAY.879.12	>24_GTG_HLIQY.431.12	>25_GTA_YTRQV.612.12	>26_GGT_ALKNM.1217.12	>27_GGT_LTKDQ.3146.12	>28_GGG_RSKER.3287.12	>29_GGC_TLKNQ.2174.12	>30_GGA_LAKDQ.1388.12	>31_GCT_KITKF.603.12	>32_GCC_VRLKY.409.12	>33_GCA_ALRQQ.371.12	>34_GAT_RTMRY.1105.12	>35_GAG_VMRWY.442.12	>36_GAC_ATRRF.967.12	>37_GAA_RFQKF.862.12	>38_CTA_LHYAK.1345.12	>39_CTA_IFNAK.1326.12	>40_CGG_STRER.582.12	>41_CGC_RVMSR.533.12	>42_CGA_TFYAA.1090.12	>43_CCT_MTNGK.1050.12	>44_CCT_RGDSK.2134.12	>45_CCG_RCYEK.2087.12	>46_CCC_RLDSK.1612.12	>47_CCA_KMTQK.2183.12	>48_CCA_EHNAK.2715.12	>49_CAT_LSQSR.898.12	>51_CAG_MSHWR.901.12	>52_CAC_LGMRR.1471.12
	NNTCCTGACAGTNN	NNCTAATTAGCANN	NNCGCATTAACANN	NNCTAATTAATGNN	NNCTAATTACANN	NNTGGTTAATTANN	NNTTCACTAATGNN	NNTCCATTAGTGNN	NNCTCATTAAGANN	NNCTAATTAGCANN	NNTCATTAGTGNN	NNAGGATTAGTGNN	NNTCCTGACAGTNN	NNTGGTTAATCCNN	NNAGTGCTTCACNN	NNCTTGTTAATANN	NNCTAATTAATANN	NNCGTATTAATCNN	NNGCGCATTAATNN	NNCTCATTAATGNN	NNGCGCTAAGTANN	NNCCACTTAACANN	NNGTTCTAAGTANN	NNACGCCTTAAGNN	NNTTCCTTAATANN	NNTCCCTTAAGGNN	NNTGCGCATCGANN	NNCTCCTTAAAANN	NNCGGCTTAAGANN	NNCGTCTTAAGCNN	NNATCTTAAGTANN	NNCGTCTTAAGCNN	NNGCCTCTCAAGNN	NNCGTCTTACGANN	NNACTTCTTAAANN	NNGCTGGTTAACNN	NNGCTCGTTAGANN	NNTCCCGTTAACNN	NNTCGTGTTAACNN	NNCCTCGTTAGTNN	NNCTGGTTAATGNN	NNCGGGTTAAAGNN	NNCTGGTTAAACNN	NNTCGGGTTAGTNN	NNGCTGGTTAGGNN	NNCTAGTTAGCANN	NNTTAGTTAACANN	NNGCCTGTTTAANN	NNGTGTGTTAGTNN
	>1_TTT_RTVAA.566.13	>2_TTT_RTVSA.507.13	>4_TTC_VRVSA.489.13	>5_TTC_TRVAA.879.13	>6_TTA_VRVAA.1617.13	>7_TTA_RVLRA.1035.13	>8_TGT_RVVSQ.691.13	>9_TGG_KTTQD.1913.13	>10_TGG_KSVMQ.887.13	>11_TGA_KSVAQ.1398.13	>12_TGA_RGVAA.1700.13	>13_TCT_ATVKA.1178.13	>14_TCG_KGTQM.1308.13	>15_TCC_RMIKS.503.13	>17_TAT_TRVSA.655.13	>18_TAG_RLTQA.734.13	>19_TAG_RMVSA.470.13	>20_TAC_QRVSA.1098.13	>21_TAC_ERVSV.1164.13	>22_TAA_RITAA.1668.13	>23_GTT_GTRAY.797.13	>24_GTG_HLIQY.415.13	>25_GTA_YTRQV.606.13	>26_GGT_ALKNM.1208.13	>27_GGT_LTKDQ.3017.13	>28_GGG_RSKER.3254.13	>29_GGC_TLKNQ.2131.13	>30_GGA_LAKDQ.1381.13	>31_GCT_KITKF.591.13	>32_GCC_VRLKY.405.13	>33_GCA_ALRQQ.366.13	>34_GAT_RTMRY.1095.13	>35_GAG_VMRWY.437.13	>36_GAC_ATRRF.955.13	>37_GAA_RFQKF.786.13	>38_CTA_LHYAK.1334.13	>39_CTA_IFNAK.1315.13	>40_CGG_STRER.560.13	>41_CGC_RVMSR.516.13	>42_CGA_TFYAA.982.13	>43_CCT_MTNGK.1016.13	>44_CCT_RGDSK.2105.13	>45_CCG_RCYEK.1823.13	>46_CCC_RLDSK.1450.13	>47_CCA_KMTQK.2112.13	>48_CCA_EHNAK.2428.13	>49_CAT_LSQSR.890.13	>51_CAG_MSHWR.889.13	>52_CAC_LGMRR.1329.13
	NNCTCATTAATGNN	NNGCTAATTAATNN	NNGCATTAGCANN	NNTAGTTAATTANN	NNCTCATTAGCGNN	NNGTAATTAGTANN	NNTACACTAATGNN	NNGCCCGTAGGCNN	NNCTCATTATGANN	NNTTCATTAATANN	NNCTAATTAACANN	NNGGGGATTAACNN	NNCCCATTAGGGNN	NNTTCTTAATCCNN	NNCGCATTAATGNN	NNGCCAATTATANN	NNACTGCAAAAGNN	NNCGCATTAGCGNN	NNCGCATTAAGNN	NNCTCATTAAGANN	NNCTACTTAGTANN	NNCCACTTAATANN	NNGTCCAGATTGNN	NNGCACCTTACANN	NNCTCCTTATGANN	NNTCCCTCACTGNN	NNCGCCTTAACANN	NNTTCCTTAAGANN	NNATGCTATCTTNN	NNTCACTAAGCCNN	NNCTACTTAGGANN	NNCGTCTTAACNN	NNCCTCTTTAGGNN	NNCGTCTTAACTNN	NNGCTTCTTAACNN	NNCCTAGTTAGTNN	NNACTCGTTAATNN	NNACTGCAAAAGNN	NNCGAGTTAACANN	NNCCTCGTTAAANN	NNCTGGTTAAAANN	NNGCGGGTTAACNN	NNCCGGTTAATANN	NNGCGGGTTAAANN	NNATCAGTCCTTNN	NNCTAGTTAGTGNN	NNCTCCTTAACANN	NNCCTGTTATAGNN	NNATGTGTTAACNN
	>1_TTT_RTVAA.539.14	>2_TTT_RTVSA.494.14	>4_TTC_VRVSA.413.14	>5_TTC_TRVAA.864.14	>6_TTA_VRVAA.1604.14	>7_TTA_RVLRA.994.14	>8_TGT_RVVSQ.648.14	>9_TGG_KTTQD.1855.14	>10_TGG_KSVMQ.872.14	>11_TGA_KSVAQ.1279.14	>12_TGA_RGVAA.1592.14	>13_TCT_ATVKA.1126.14	>14_TCG_KGTQM.1224.14	>15_TCC_RMIKS.472.14	>17_TAT_TRVSA.586.14	>18_TAG_RLTQA.702.14	>19_TAG_RMVSA.460.14	>20_TAC_QRVSA.1051.14	>21_TAC_ERVSV.1161.14	>22_TAA_RITAA.1573.14	>23_GTT_GTRAY.763.14	>24_GTG_HLIQY.406.14	>25_GTA_YTRQV.584.14	>26_GGT_ALKNM.1127.14	>27_GGT_LTKDQ.2879.14	>28_GGG_RSKER.3100.14	>29_GGC_TLKNQ.2101.14	>30_GGA_LAKDQ.1204.14	>31_GCT_KITKF.577.14	>32_GCC_VRLKY.403.14	>33_GCA_ALRQQ.360.14	>34_GAT_RTMRY.1016.14	>35_GAG_VMRWY.420.14	>36_GAC_ATRRF.933.14	>37_GAA_RFQKF.769.14	>38_CTA_LHYAK.1278.14	>39_CTA_IFNAK.1296.14	>40_CGG_STRER.530.14	>41_CGC_RVMSR.491.14	>42_CGA_TFYAA.973.14	>43_CCT_MTNGK.960.14	>44_CCT_RGDSK.1878.14	>45_CCG_RCYEK.1705.14	>46_CCC_RLDSK.1277.14	>47_CCA_KMTQK.2080.14	>48_CCA_EHNAK.2427.14	>49_CAT_LSQSR.850.14	>51_CAG_MSHWR.880.14	>52_CAC_LGMRR.1153.14
	NNCTAATTAATGNN	NNCTAATTAATANN	NNCGTATTAGAANN	NNCTAATTAGGGNN	NNCTAATTATTANN	NNTGGCTAATTANN	NNAGCGCTAATGNN	NNCCCATTAGTANN	NNCTCATTAGCGNN	NNGTCCAGATTGNN	NNTTCATTAGTGNN	NNTCCTTAATCCNN	NNATGCTATCTTNN	NNGAGGATTAAANN	NNCGCATTAGCGNN	NNGCTCGTTAAGNN	NNCTCATTAATANN	NNCGTATTAGAANN	NNGCGCATTATCNN	NNCTAATTAAGTNN	NNCTGTTAAGTANN	NNCCCACTTAAANN	NNTTCCTAAGTANN	NNCGCCTTAAAANN	NNTGCGCATCGANN	NNTCCCCTTAAANN	NNCGCCTTAGGGNN	NNTTCCTTAGCANN	NNCAGCTTAAGANN	NNTGCCTAAGCCNN	NNACTCTAAGTANN	NNCGTCTCACGANN	NNCCTCTTAAGCNN	NNCGTCTTAACCNN	NNCGTTCTTTAANN	NNGCTAGTTATGNN	NNCCTAGTTAATNN	NNTCCGTTAATGNN	NNGCGCGTTAGTNN	NNACTCGTTATCNN	NNGTTGGTTAACNN	NNCGGGTTAGTNN	NNCTGGTTAAAANN	NNCGGGTTAACCNN	NNGATGGTTAAANN	NNGATGGTTAACNN	NNACTGTTAACANN	NNCCTGTTATAANN	NNATGTGTTAATNN
	>1_TTT_RTVAA.534.15	>2_TTT_RTVSA.486.15	>4_TTC_VRVSA.401.15	>5_TTC_TRVAA.829.15	>6_TTA_VRVAA.1547.15	>7_TTA_RVLRA.928.15	>8_TGT_RVVSQ.642.15	>9_TGG_KTTQD.1819.15	>10_TGG_KSVMQ.846.15	>11_TGA_KSVAQ.1277.15	>12_TGA_RGVAA.1581.15	>13_TCT_ATVKA.1124.15	>14_TCG_KGTQM.1199.15	>15_TCC_RMIKS.449.15	>17_TAT_TRVSA.584.15	>18_TAG_RLTQA.680.15	>19_TAG_RMVSA.459.15	>20_TAC_QRVSA.1045.15	>21_TAC_ERVSV.1112.15	>22_TAA_RITAA.1570.15	>23_GTT_GTRAY.759.15	>24_GTG_HLIQY.363.15	>25_GTA_YTRQV.579.15	>26_GGT_ALKNM.1101.15	>27_GGT_LTKDQ.2655.15	>28_GGG_RSKER.3084.15	>29_GGC_TLKNQ.1986.15	>30_GGA_LAKDQ.1203.15	>31_GCT_KITKF.562.15	>32_GCC_VRLKY.397.15	>33_GCA_ALRQQ.351.15	>34_GAT_RTMRY.930.15	>35_GAG_VMRWY.413.15	>36_GAC_ATRRF.894.15	>37_GAA_RFQKF.702.15	>38_CTA_LHYAK.1130.15	>39_CTA_IFNAK.1289.15	>40_CGG_STRER.530.15	>41_CGC_RVMSR.443.15	>42_CGA_TFYAA.879.15	>43_CCT_MTNGK.939.15	>44_CCT_RGDSK.1805.15	>45_CCG_RCYEK.1490.15	>46_CCC_RLDSK.1102.15	>47_CCA_KMTQK.2073.15	>48_CCA_EHNAK.2342.15	>49_CAT_LSQSR.811.15	>51_CAG_MSHWR.840.15	>52_CAC_LGMRR.992.15
	NNTTCATTAGTGNN	NNCGCATTAACANN	NNGCTAATTAATNN	NNCTCATTAGTANN	NNCTTATTAAGANN	NNTTGTTAATTANN	NNCTCATTAATGNN	NNCCCATTAGGGNN	NNTTGGGTACAANN	NNCTAATTAGGGNN	NNTTCATTAAGANN	NNCCGGATTAACNN	NNCCCATTAGAANN	NNGAGTTAATCCNN	NNCGCATTAAAGNN	NNCCAATTAGTANN	NNCCGTGTTAGTNN	NNCGTATTAAGTNN	NNCGTATTAACTNN	NNCTAATTAAGGNN	NNCTACTTAGAANN	NNGCCACTTATCNN	NNGCTACTTAAGNN	NNTCGCCTTAAGNN	NNCTCCTTAAGTNN	NNCCCCTTAGCANN	NNCGCCTTAAACNN	NNCTCCTTAGGGNN	NNCGTCTTAGCANN	NNGGCCTAAGCCNN	NNGCGCTAAGTANN	NNGTCACTAAGANN	NNGCCTCTTAAANN	NNCGTCTTAAAGNN	NNCTTCTTAGTGNN	NNCTAGTTAAGTNN	NNACTAGTTACANN	NNTCCGTTAAGGNN	NNGCGCGTTAAANN	NNTCTCGTTAACNN	NNGTTGGTTAATNN	NNTCCTGACAGTNN	NNACTGCAAAAGNN	NNCGGGTTAAAGNN	NNCTAGTTAAGANN	NNTGCGCATCGANN	NNCATGTTAATGNN	NNCTGTTAAGCNN	NNCGTGTTAATGNN
	>1_TTT_RTVAA.517.16	>2_TTT_RTVSA.468.16	>4_TTC_VRVSA.395.16	>5_TTC_TRVAA.820.16	>6_TTA_VRVAA.1546.16	>7_TTA_RVLRA.872.16	>8_TGT_RVVSQ.640.16	>9_TGG_KTTQD.1705.16	>10_TGG_KSVMQ.830.16	>11_TGA_KSVAQ.1229.16	>12_TGA_RGVAA.1492.16	>13_TCT_ATVKA.1115.16	>14_TCG_KGTQM.1086.16	>15_TCC_RMIKS.432.16	>17_TAT_TRVSA.583.16	>18_TAG_RLTQA.675.16	>19_TAG_RMVSA.447.16	>20_TAC_QRVSA.938.16	>21_TAC_ERVSV.1075.16	>22_TAA_RITAA.1505.16	>23_GTT_GTRAY.747.16	>24_GTG_HLIQY.347.16	>25_GTA_YTRQV.574.16	>26_GGT_ALKNM.1082.16	>27_GGT_LTKDQ.2482.16	>28_GGG_RSKER.2820.16	>29_GGC_TLKNQ.1877.16	>30_GGA_LAKDQ.1182.16	>31_GCT_KITKF.559.16	>32_GCC_VRLKY.371.16	>33_GCA_ALRQQ.345.16	>34_GAT_RTMRY.914.16	>35_GAG_VMRWY.410.16	>36_GAC_ATRRF.762.16	>37_GAA_RFQKF.635.16	>38_CTA_LHYAK.1122.16	>39_CTA_IFNAK.1148.16	>40_CGG_STRER.517.16	>41_CGC_RVMSR.435.16	>42_CGA_TFYAA.845.16	>43_CCT_MTNGK.885.16	>44_CCT_RGDSK.1750.16	>45_CCG_RCYEK.1309.16	>46_CCC_RLDSK.1016.16	>47_CCA_KMTQK.2003.16	>48_CCA_EHNAK.2256.16	>49_CAT_LSQSR.791.16	>51_CAG_MSHWR.834.16	>52_CAC_LGMRR.984.16
	NNGCTAATTAAANN	NNATGCTATCTTNN	NNCGCATTAATGNN	NNGTCCTAATTANN	NNCTAATTAACCNN	NNCTAATTAGCANN	NNCGACTTAATGNN	NNGCCCATTAAGNN	NNCCCATTAAGGNN	NNTGCGCATCGANN	NNCTAATTAATANN	NNGGATTAGTANN	NNCCAATTAATANN	NNAGGATTAATCNN	NNCGCATTAACANN	NNCCAATTAACANN	NNCTAATTAGGGNN	NNCCGTGTTAGTNN	NNACGCATTAAGNN	NNCTAATTAACCNN	NNCTACTTAAGANN	NNCCACTTAGGGNN	NNGTCTTAAGTANN	NNCCGCCTTAAGNN	NNCTCCTTAAAANN	NNCCCCCTTAACNN	NNCGCCTTAAGTNN	NNTTCCTTATGGNN	NNCGGCTTAACANN	NNCGTTCTTTAANN	NNCTGTTAAGTANN	NNCGTCTTAAAANN	NNCCTCTTACGGNN	NNCGTCTTAAGGNN	NNGCTACTTAAANN	NNCTAGTTAAATNN	NNGCTCGTTATCNN	NNCCGTTAGTGNN	NNCGTGTTAACTNN	NNGCTCGTTATCNN	NNGAAGGTTAACNN	NNGGCGTGATAANN	NNATTGGTTAACNN	NNTCGGGTTAAANN	NNGGTGGTTAACNN	NNGCTGGTTAGGNN	NNTTTGTTAACANN	NNCCTGTTAGCGNN	NNGTGTGCTAAGNN
	>1_TTT_RTVAA.404.17	>2_TTT_RTVSA.461.17	>4_TTC_VRVSA.390.17	>5_TTC_TRVAA.788.17	>6_TTA_VRVAA.1539.17	>7_TTA_RVLRA.828.17	>8_TGT_RVVSQ.639.17	>9_TGG_KTTQD.1661.17	>10_TGG_KSVMQ.829.17	>11_TGA_KSVAQ.1223.17	>12_TGA_RGVAA.1366.17	>13_TCT_ATVKA.1112.17	>14_TCG_KGTQM.1084.17	>15_TCC_RMIKS.423.17	>17_TAT_TRVSA.572.17	>18_TAG_RLTQA.671.17	>19_TAG_RMVSA.427.17	>20_TAC_QRVSA.869.17	>21_TAC_ERVSV.891.17	>22_TAA_RITAA.1415.17	>23_GTT_GTRAY.735.17	>24_GTG_HLIQY.342.17	>25_GTA_YTRQV.563.17	>26_GGT_ALKNM.1031.17	>27_GGT_LTKDQ.2358.17	>28_GGG_RSKER.2591.17	>29_GGC_TLKNQ.1759.17	>30_GGA_LAKDQ.1146.17	>31_GCT_KITKF.556.17	>32_GCC_VRLKY.371.17	>33_GCA_ALRQQ.312.17	>34_GAT_RTMRY.894.17	>35_GAG_VMRWY.395.17	>36_GAC_ATRRF.757.17	>37_GAA_RFQKF.606.17	>38_CTA_LHYAK.1070.17	>39_CTA_IFNAK.1137.17	>40_CGG_STRER.489.17	>41_CGC_RVMSR.410.17	>42_CGA_TFYAA.839.17	>43_CCT_MTNGK.822.17	>44_CCT_RGDSK.1646.17	>45_CCG_RCYEK.1280.17	>46_CCC_RLDSK.1011.17	>47_CCA_KMTQK.1999.17	>48_CCA_EHNAK.2251.17	>49_CAT_LSQSR.766.17	>51_CAG_MSHWR.793.17	>52_CAC_LGMRR.978.17
	NNGTAATTAGTANN	NNCCTATTAATGNN	NNCGCATTAATTNN	NNCTAATTAAGGNN	NNCTAATTAGCGNN	NNCCGCTAATTANN	NNTGCATTAATGNN	NNACCCATTAACNN	NNCTCATTAAANN	NNTACATAATGANN	NNCTCATTAATGNN	NNCGGATTACGANN	NNTACATAATGANN	NNCCCTTAATCCNN	NNCGTATTAGTANN	NNCCAATTAAAGNN	NNCTCATTAGTGNN	NNCGCATTAATTNN	NNACTGCAAAAGNN	NNCTAATTAATANN	NNCTACTTATCANN	NNCCACTTAGGANN	NNTTTCTAAGTANN	NNGCACCTTAATNN	NNCTCCTTAAGANN	NNTCCCTTAATGNN	NNGCGCCTTAAANN	NNCTTCCTTAACNN	NNTGCTTAAGCCNN	NNTTATTAAGCCNN	NNTCACTAAGTANN	NNCGTCTTAACCNN	NNACCTCTTAAGNN	NNCGTCTTACTANN	NNACTACTTATCNN	NNGCTAGTTAAANN	NNGCTCGTTAAANN	NNTCCCGTTAGTNN	NNGCGCGTTAATNN	NNGCTCGTTACGNN	NNGATGGTTAAGNN	NNGCGGGTTAATNN	NNTCGGTTAAGGNN	NNACGGGTTAACNN	NNCTAGTTAACANN	NNAATGGTTAAGNN	NNTTACTTAACANN	NNCCTGTTATTGNN	NNGCGTGTTAGGNN
	>1_TTT_RTVAA.399.18	>2_TTT_RTVSA.450.18	>4_TTC_VRVSA.386.18	>5_TTC_TRVAA.771.18	>6_TTA_VRVAA.1515.18	>7_TTA_RVLRA.812.18	>8_TGT_RVVSQ.618.18	>9_TGG_KTTQD.1590.18	>10_TGG_KSVMQ.812.18	>11_TGA_KSVAQ.1168.18	>12_TGA_RGVAA.1336.18	>13_TCT_ATVKA.1070.18	>14_TCG_KGTQM.1016.18	>15_TCC_RMIKS.411.18	>17_TAT_TRVSA.532.18	>18_TAG_RLTQA.665.18	>19_TAG_RMVSA.421.18	>20_TAC_QRVSA.828.18	>21_TAC_ERVSV.889.18	>22_TAA_RITAA.1406.18	>23_GTT_GTRAY.725.18	>24_GTG_HLIQY.302.18	>25_GTA_YTRQV.561.18	>26_GGT_ALKNM.1006.18	>27_GGT_LTKDQ.2247.18	>28_GGG_RSKER.2565.18	>29_GGC_TLKNQ.1695.18	>30_GGA_LAKDQ.1129.18	>31_GCT_KITKF.545.18	>32_GCC_VRLKY.366.18	>33_GCA_ALRQQ.306.18	>34_GAT_RTMRY.828.18	>35_GAG_VMRWY.386.18	>36_GAC_ATRRF.686.18	>37_GAA_RFQKF.584.18	>38_CTA_LHYAK.1035.18	>39_CTA_IFNAK.1129.18	>40_CGG_STRER.483.18	>41_CGC_RVMSR.393.18	>42_CGA_TFYAA.746.18	>43_CCT_MTNGK.818.18	>44_CCT_RGDSK.1631.18	>45_CCG_RCYEK.1238.18	>46_CCC_RLDSK.1002.18	>47_CCA_KMTQK.1981.18	>48_CCA_EHNAK.2226.18	>49_CAT_LSQSR.762.18	>51_CAG_MSHWR.775.18	>52_CAC_LGMRR.950.18
	NNGCTCATTAAGNN	NNCGTATTAATANN	NNCGCATTAAAGNN	NNGTAATTAGTANN	NNCTAATTAGGNN	NNTAGTTAATTANN	NNCGTGCTAATGNN	NNGTCCATTAAGNN	NNCTCATTAGACNN	NNTTCATTAAGANN	NNTAATTAACANN	NNTGGATTAGTANN	NNGCCATTAGTANN	NNCTGCTAATCCNN	NNCGCATTATGGNN	NNCTTGTTAATGNN	NNTCCTGACAGTNN	NNCGTATTAGGANN	NNCGTATTAGTTNN	NNTCCTGACAGTNN	NNGTTCTAAGTANN	NNCCACTTAGTANN	NNTTCTTAAGTANN	NNCCACTTACTTNN	NNCTCCTTAGGNN	NNTCCCTTAATANN	NNACGCCTTAAGNN	NNCTCCTTAAAGNN	NNCGTCTTAACCNN	NNTTGTTAAGCCNN	NNAATTTAAGTANN	NNCGTCTTAGCANN	NNCCTCTTAAAANN	NNCGTCTCAGACNN	NNGGTTCTTATCNN	NNGGTAGTTAAANN	NNGGTAGTTAAGNN	NNGTCCGTTAATNN	NNGCATGTTAACNN	NNCTCGTTAATANN	NNCTGGTTAGAGNN	NNGCGGGTTAGANN	NNCTTCCCACGANN	NNGCGGGTTATGNN	NNTTCTTAACCANN	NNGGTAGTTAAANN	NNGAAGTTAACANN	NNTCCTGTTAACNN	NNGTGTGTTATCNN
	>1_TTT_RTVAA.383.19	>2_TTT_RTVSA.447.19	>4_TTC_VRVSA.376.19	>5_TTC_TRVAA.665.19	>6_TTA_VRVAA.1476.19	>7_TTA_RVLRA.755.19	>8_TGT_RVVSQ.603.19	>9_TGG_KTTQD.1449.19	>10_TGG_KSVMQ.801.19	>11_TGA_KSVAQ.1166.19	>12_TGA_RGVAA.1238.19	>13_TCT_ATVKA.1040.19	>14_TCG_KGTQM.994.19	>15_TCC_RMIKS.394.19	>17_TAT_TRVSA.514.19	>18_TAG_RLTQA.660.19	>19_TAG_RMVSA.392.19	>20_TAC_QRVSA.765.19	>21_TAC_ERVSV.886.19	>22_TAA_RITAA.1213.19	>23_GTT_GTRAY.678.19	>24_GTG_HLIQY.301.19	>25_GTA_YTRQV.547.19	>26_GGT_ALKNM.903.19	>27_GGT_LTKDQ.2181.19	>28_GGG_RSKER.2403.19	>29_GGC_TLKNQ.1619.19	>30_GGA_LAKDQ.1082.19	>31_GCT_KITKF.541.19	>32_GCC_VRLKY.365.19	>33_GCA_ALRQQ.300.19	>34_GAT_RTMRY.739.19	>35_GAG_VMRWY.357.19	>36_GAC_ATRRF.658.19	>37_GAA_RFQKF.570.19	>38_CTA_LHYAK.967.19	>39_CTA_IFNAK.1129.19	>40_CGG_STRER.480.19	>41_CGC_RVMSR.393.19	>42_CGA_TFYAA.664.19	>43_CCT_MTNGK.818.19	>44_CCT_RGDSK.1616.19	>45_CCG_RCYEK.1202.19	>46_CCC_RLDSK.1001.19	>47_CCA_KMTQK.1855.19	>48_CCA_EHNAK.2220.19	>49_CAT_LSQSR.744.19	>51_CAG_MSHWR.728.19	>52_CAC_LGMRR.929.19
	NNCTAATTAGGTNN	NNCGCATTAATTNN	NNCGTATTAATANN	NNTTGTTAATTANN	NNCCTAATTATCNN	NNCTAATTAACANN	NNTGAGATAATGNN	NNGCTCATCGTTNN	NNCTCATTAGAGNN	NNCTCATTATCANN	NNGCTAATTAACNN	NNTCGGATTAATNN	NNCCATTAAGANN	NNTCGGATTAAGNN	NNGCTAATTAATNN	NNTCAATTAGTGNN	NNCGCATTAATTNN	NNCGTATTATCANN	NNCGCATTAATTNN	NNCTAATTAACANN	NNCCTACTTAAGNN	NNTGCCTAAGTGNN	NNCGCTTAAGTANN	NNGCGCCTTAAANN	NNCTTCCTTAACNN	NNCCCCTTAAGANN	NNGCGCCTTAATNN	NNCTCCTTAGCCNN	NNGGTCTTAAGANN	NNCACTTAAGCCNN	NNGTCTTAAGTANN	NNGGTCTTAAGANN	NNCCTCTTAATTNN	NNCGTCTTAGCANN	NNACTACTTAACNN	NNCCTAGTTAAGNN	NNACTAGTTAATNN	NNTCCTGACAGTNN	NNTTAGTTAACANN	NNGCTCGTTATGNN	NNCCTGGTTAATNN	NNTCGGGTTAGTNN	NNCTGGTTAGTCNN	NNCGGGTTAGTANN	NNCTGTTAACTANN	NNGCTAGTTATGNN	NNTCATGTTAAANN	NNCCTGTTAATTNN	NNGCGTGTAAAANN
	>1_TTT_RTVAA.379.20	>2_TTT_RTVSA.411.20	>4_TTC_VRVSA.361.20	>5_TTC_TRVAA.663.20	>6_TTA_VRVAA.1441.20	>7_TTA_RVLRA.743.20	>8_TGT_RVVSQ.594.20	>9_TGG_KTTQD.1364.20	>10_TGG_KSVMQ.784.20	>11_TGA_KSVAQ.1118.20	>12_TGA_RGVAA.1145.20	>13_TCT_ATVKA.1023.20	>14_TCG_KGTQM.918.20	>15_TCC_RMIKS.393.20	>17_TAT_TRVSA.508.20	>18_TAG_RLTQA.642.20	>19_TAG_RMVSA.389.20	>20_TAC_QRVSA.744.20	>21_TAC_ERVSV.866.20	>22_TAA_RITAA.1177.20	>23_GTT_GTRAY.638.20	>24_GTG_HLIQY.275.20	>25_GTA_YTRQV.541.20	>26_GGT_ALKNM.897.20	>27_GGT_LTKDQ.2180.20	>28_GGG_RSKER.2344.20	>29_GGC_TLKNQ.1606.20	>30_GGA_LAKDQ.1049.20	>31_GCT_KITKF.523.20	>32_GCC_VRLKY.358.20	>33_GCA_ALRQQ.295.20	>34_GAT_RTMRY.633.20	>35_GAG_VMRWY.353.20	>36_GAC_ATRRF.622.20	>37_GAA_RFQKF.566.20	>38_CTA_LHYAK.951.20	>39_CTA_IFNAK.1119.20	>40_CGG_STRER.472.20	>41_CGC_RVMSR.390.20	>42_CGA_TFYAA.654.20	>43_CCT_MTNGK.811.20	>44_CCT_RGDSK.1594.20	>45_CCG_RCYEK.1130.20	>46_CCC_RLDSK.996.20	>47_CCA_KMTQK.1799.20	>48_CCA_EHNAK.2187.20	>49_CAT_LSQSR.705.20	>51_CAG_MSHWR.712.20	>52_CAC_LGMRR.893.20
	NNCCTAATTATCNN	NNCTCATTAATANN	NNCGTATTATCANN	NNCCGCTAATTANN	NNCTTATTAGTGNN	NNGCTAATTAAANN	NNGCTGCTAATGNN	NNCCCATTAAGGNN	NNCTCATTAATANN	NNCTAATTATGANN	NNCTAATTAACCNN	NNGGATTAATGNN	NNCCCATTAAAGNN	NNGGATTAATGNN	NNCGTATTAACTNN	NNCTTGTTAGTGNN	NNCATATTAATGNN	NNCGTATTAACTNN	NNGCGCATTAGTNN	NNCTAATTAGCGNN	NNTTCCTAAGTANN	NNGCCACTTAGANN	NNCCTACTTAAGNN	NNACTGCAAAAGNN	NNCTCCTTAGGGNN	NNGCCCCTTAAGNN	NNCGCCTTAGCGNN	NNCTCCTTAATCNN	NNTCCTGACAGTNN	NNCCCTTAAGCCNN	NNTGTCTAAGTANN	NNCGTCTTAAGGNN	NNCCTCTTAAGTNN	NNCGTCTTAGAANN	NNGGTTCTTAGTNN	NNGCTAGTTAAGNN	NNCCTAGTTAAANN	NNCCCGTTAGTGNN	NNCTTGTTAACANN	NNGCTCGTTAAANN	NNTCAGGTTAACNN	NNGCAGGTTAAANN	NNCCTGGTTAAANN	NNGCAGGTTAAGNN	NNAACTTAACTANN	NNGCTAGTTAGTNN	NNTCGTGTTAACNN	NNCCTGTTAGCANN	NNTCCTGACAGTNN
	>1_TTT_RTVAA.346.21	>2_TTT_RTVSA.404.21	>4_TTC_VRVSA.357.21	>5_TTC_TRVAA.656.21	>6_TTA_VRVAA.1419.21	>7_TTA_RVLRA.741.21	>8_TGT_RVVSQ.567.21	>9_TGG_KTTQD.1340.21	>10_TGG_KSVMQ.740.21	>11_TGA_KSVAQ.1112.21	>12_TGA_RGVAA.1120.21	>13_TCT_ATVKA.945.21	>14_TCG_KGTQM.829.21	>15_TCC_RMIKS.390.21	>17_TAT_TRVSA.450.21	>18_TAG_RLTQA.635.21	>19_TAG_RMVSA.364.21	>20_TAC_QRVSA.682.21	>21_TAC_ERVSV.853.21	>22_TAA_RITAA.1096.21	>23_GTT_GTRAY.609.21	>24_GTG_HLIQY.271.21	>25_GTA_YTRQV.505.21	>26_GGT_ALKNM.814.21	>27_GGT_LTKDQ.2176.21	>28_GGG_RSKER.2320.21	>29_GGC_TLKNQ.1502.21	>30_GGA_LAKDQ.1035.21	>31_GCT_KITKF.514.21	>32_GCC_VRLKY.357.21	>33_GCA_ALRQQ.292.21	>34_GAT_RTMRY.631.21	>35_GAG_VMRWY.353.21	>36_GAC_ATRRF.601.21	>37_GAA_RFQKF.561.21	>38_CTA_LHYAK.947.21	>39_CTA_IFNAK.1103.21	>40_CGG_STRER.455.21	>41_CGC_RVMSR.379.21	>42_CGA_TFYAA.650.21	>43_CCT_MTNGK.763.21	>44_CCT_RGDSK.1554.21	>45_CCG_RCYEK.1095.21	>46_CCC_RLDSK.962.21	>47_CCA_KMTQK.1776.21	>48_CCA_EHNAK.2140.21	>49_CAT_LSQSR.703.21	>51_CAG_MSHWR.705.21	>52_CAC_LGMRR.879.21
	NNCTCATTAGTANN	NNCCCATTAATANN	NNGCGTATTAATNN	NNTGGTTAATTANN	NNCTCATTAAGANN	NNTCACTAATTANN	NNCTCATTAGTGNN	NNGCCCATTACANN	NNTCCATTAAGGNN	NNCTAATTAGCGNN	NNCTCATTAATANN	NNCGGATTAGGANN	NNCCATTAATANN	NNGGGGATTAATNN	NNCGTATTAATCNN	NNTCCAATTAAGNN	NNCTAATTAGCANN	NNCGTATTAACANN	NNCGTATTAATANN	NNCGGATCGGCCNN	NNTGCGTAAGTANN	NNCCACTTACAANN	NNAGCCTAAGTANN	NNGTACCTTAAGNN	NNTTCCTTAAGANN	NNTCCCTTAGTGNN	NNTCGCCTTACGNN	NNCTCCTTTAGANN	NNCGTCTTAAAGNN	NNCGTCTTAGGANN	NNTGCGTAAGTANN	NNCGTCTTAACTNN	NNCCTCTTAACGNN	NNCGTCTTATGNN	NNGGTTCTTATGNN	NNTCTAGTTAAGNN	NNGCTAGTTAGANN	NNCCCGTTAATTNN	NNCAAGTTAACANN	NNGCTCGTTAGCNN	NNATTGGTTAACNN	NNCGGGTTAACCNN	NNTCGGTTAAGANN	NNTCGGGTTAACNN	NNGCTGGTTATCNN	NNGCTGGTTATCNN	NNGCATGTTAACNN	NNCCCTGTTAGANN	NNCGTGTTAGTCNN
	>1_TTT_RTVAA.343.22	>2_TTT_RTVSA.391.22	>4_TTC_VRVSA.340.22	>5_TTC_TRVAA.620.22	>6_TTA_VRVAA.1384.22	>7_TTA_RVLRA.700.22	>8_TGT_RVVSQ.560.22	>9_TGG_KTTQD.1319.22	>10_TGG_KSVMQ.725.22	>11_TGA_KSVAQ.1091.22	>12_TGA_RGVAA.940.22	>13_TCT_ATVKA.879.22	>14_TCG_KGTQM.795.22	>15_TCC_RMIKS.372.22	>17_TAT_TRVSA.449.22	>18_TAG_RLTQA.614.22	>19_TAG_RMVSA.349.22	>20_TAC_QRVSA.636.22	>21_TAC_ERVSV.841.22	>22_TAA_RITAA.1079.22	>23_GTT_GTRAY.608.22	>24_GTG_HLIQY.264.22	>25_GTA_YTRQV.500.22	>26_GGT_ALKNM.803.22	>27_GGT_LTKDQ.2136.22	>28_GGG_RSKER.2278.22	>29_GGC_TLKNQ.1454.22	>30_GGA_LAKDQ.1028.22	>31_GCT_KITKF.509.22	>32_GCC_VRLKY.333.22	>33_GCA_ALRQQ.286.22	>34_GAT_RTMRY.574.22	>35_GAG_VMRWY.352.22	>36_GAC_ATRRF.582.22	>37_GAA_RFQKF.519.22	>38_CTA_LHYAK.873.22	>39_CTA_IFNAK.1000.22	>40_CGG_STRER.449.22	>41_CGC_RVMSR.368.22	>42_CGA_TFYAA.592.22	>43_CCT_MTNGK.762.22	>44_CCT_RGDSK.1525.22	>45_CCG_RCYEK.1047.22	>46_CCC_RLDSK.883.22	>47_CCA_KMTQK.1770.22	>48_CCA_EHNAK.2126.22	>49_CAT_LSQSR.685.22	>51_CAG_MSHWR.701.22	>52_CAC_LGMRR.876.22
	NNCTAATTAGAGNN	NNCTCATTAGTGNN	NNTGCATTAATANN	NNGTCTTAATTANN	NNCTAATTAGATNN	NNTAACTAATTANN	NNCGTCTTAATGNN	NNCCCATTAGAANN	NNTTCATTAGTGNN	NNCTAATTAATGNN	NNCTAATTAAGTNN	NNCGGATTAATTNN	NNCCAATTAGTGNN	NNGTGCTAATCCNN	NNCGTATTAACANN	NNCCAATTAAACNN	NNCGTATTAATANN	NNCGCATTAAGCNN	NNCGTATTACGTNN	NNCTAATTACGANN	NNCTACTTAAGTNN	NNGCCACTTATANN	NNATCTTAAGTANN	NNGCACCTTAACNN	NNCTCCTTAAGNN	NNCCCCTTAACGNN	NNCGCCTTAATGNN	NNCTCCTTAGTTNN	NNTGGCTTAAGCNN	NNGAGTTAAGCCNN	NNTTGCTAAGTANN	NNCGTCTTAGACNN	NNCCTCTTCATGNN	NNCGTCTTCACANN	NNCTTCTTAATANN	NNGCTAGTTATTNN	NNGCTAGTTAAGNN	NNCCCGTTAACANN	NNGAAGTTAACANN	NNCTCGTTAACCNN	NNACTGCAAAAGNN	NNCGGGTTAGTANN	NNCCGGTTAGGANN	NNCGGGTTAGCANN	NNGCTAGTTATGNN	NNACTAGTTAACNN	NNCAAGTTAACANN	NNGCCTGTTAACNN	NNGTGTGTTAGGNN
	>1_TTT_RTVAA.336.23	>2_TTT_RTVSA.377.23	>4_TTC_VRVSA.335.23	>5_TTC_TRVAA.593.23	>6_TTA_VRVAA.1354.23	>7_TTA_RVLRA.699.23	>8_TGT_RVVSQ.551.23	>9_TGG_KTTQD.1316.23	>10_TGG_KSVMQ.702.23	>11_TGA_KSVAQ.1091.23	>12_TGA_RGVAA.880.23	>13_TCT_ATVKA.878.23	>14_TCG_KGTQM.755.23	>15_TCC_RMIKS.356.23	>17_TAT_TRVSA.382.23	>18_TAG_RLTQA.603.23	>19_TAG_RMVSA.346.23	>20_TAC_QRVSA.631.23	>21_TAC_ERVSV.826.23	>22_TAA_RITAA.1056.23	>23_GTT_GTRAY.576.23	>24_GTG_HLIQY.255.23	>25_GTA_YTRQV.494.23	>26_GGT_ALKNM.791.23	>27_GGT_LTKDQ.1676.23	>28_GGG_RSKER.2204.23	>29_GGC_TLKNQ.1351.23	>30_GGA_LAKDQ.1015.23	>31_GCT_KITKF.500.23	>32_GCC_VRLKY.313.23	>33_GCA_ALRQQ.283.23	>34_GAT_RTMRY.504.23	>35_GAG_VMRWY.317.23	>36_GAC_ATRRF.561.23	>37_GAA_RFQKF.497.23	>38_CTA_LHYAK.808.23	>39_CTA_IFNAK.999.23	>40_CGG_STRER.427.23	>41_CGC_RVMSR.355.23	>42_CGA_TFYAA.577.23	>43_CCT_MTNGK.744.23	>44_CCT_RGDSK.1420.23	>45_CCG_RCYEK.987.23	>46_CCC_RLDSK.875.23	>47_CCA_KMTQK.1760.23	>48_CCA_EHNAK.2065.23	>49_CAT_LSQSR.663.23	>51_CAG_MSHWR.648.23	>52_CAC_LGMRR.858.23
	NNCTAATTAAGTNN	NNCTAATTATGANN	NNCGCATTAAGCNN	NNTGGCTAATTANN	NNGCTAATTAATNN	NNCTAATTAGCGNN	NNATCATTAATGNN	NNTCCCATTAAGNN	NNCCCATTAGTANN	NNCTCATTAATANN	NNCTCATTAAANN	NNTGGATTAGCANN	NNCCCATTAGAGNN	NNGGGGATTAAANN	NNATGCTATCTTNN	NNCTAATTAGCANN	NNGCTAATTAACNN	NNCGTATTAGGGNN	NNCGCATTAATANN	NNCTAATTAGTANN	NNCGTTTAAGTANN	NNTTCTTAAGTGNN	NNCTACTTAATGNN	NNGCGCCTTAGCNN	NNCTCCTTAGANN	NNTCCCTTAAGANN	NNCGCCTTAAGCNN	NNTTCCTTAACGNN	NNTGTCTTAAGCNN	NNCTGTTAAGCCNN	NNGTCCTAAGTANN	NNCATCTTAAGANN	NNCCTCTTAGGANN	NNCGTCTCAGAANN	NNACTACTTAAGNN	NNGCTAGTTACGNN	NNACTCGTTAGTNN	NNCCCGTTAGTANN	NNCGTGTTAACGNN	NNCTCGTTAGTGNN	NNGATGGTCAAGNN	NNCCGTGTTAGTNN	NNTCCGGTTAATNN	NNATGCTATCTTNN	NNTCTAGTTAAGNN	NNGATGGTTAAGNN	NNGGACTTAACANN	NNCCCTGTTATANN	NNGCGTGTTAGANN
	>1_TTT_RTVAA.335.24	>2_TTT_RTVSA.376.24	>4_TTC_VRVSA.329.24	>5_TTC_TRVAA.574.24	>6_TTA_VRVAA.1267.24	>7_TTA_RVLRA.682.24	>8_TGT_RVVSQ.534.24	>9_TGG_KTTQD.1226.24	>10_TGG_KSVMQ.700.24	>11_TGA_KSVAQ.1075.24	>12_TGA_RGVAA.842.24	>13_TCT_ATVKA.855.24	>14_TCG_KGTQM.752.24	>15_TCC_RMIKS.341.24	>17_TAT_TRVSA.378.24	>18_TAG_RLTQA.593.24	>19_TAG_RMVSA.345.24	>20_TAC_QRVSA.627.24	>21_TAC_ERVSV.803.24	>22_TAA_RITAA.944.24	>23_GTT_GTRAY.571.24	>24_GTG_HLIQY.253.24	>25_GTA_YTRQV.493.24	>26_GGT_ALKNM.701.24	>27_GGT_LTKDQ.1657.24	>28_GGG_RSKER.2189.24	>29_GGC_TLKNQ.1318.24	>30_GGA_LAKDQ.996.24	>31_GCT_KITKF.472.24	>32_GCC_VRLKY.307.24	>33_GCA_ALRQQ.279.24	>34_GAT_RTMRY.490.24	>35_GAG_VMRWY.309.24	>36_GAC_ATRRF.541.24	>37_GAA_RFQKF.497.24	>38_CTA_LHYAK.800.24	>39_CTA_IFNAK.977.24	>40_CGG_STRER.426.24	>41_CGC_RVMSR.351.24	>42_CGA_TFYAA.557.24	>43_CCT_MTNGK.728.24	>44_CCT_RGDSK.1409.24	>45_CCG_RCYEK.974.24	>46_CCC_RLDSK.864.24	>47_CCA_KMTQK.1745.24	>48_CCA_EHNAK.2028.24	>49_CAT_LSQSR.640.24	>51_CAG_MSHWR.643.24	>52_CAC_LGMRR.848.24
	NNCTCATTAATTNN	NNCTAATTAGGGNN	NNCGAATTAGTANN	NNAGCTTAATTANN	NNCTTATTAGCANN	NNCGCTTAATTANN	NNCGCATTATGGNN	NNTCCCATTAACNN	NNCGCATTAGCANN	NNTTCATTAACANN	NNTAATTATGANN	NNATGTATTATCNN	NNATCAGTCCTTNN	NNGCGGATTACANN	NNCGCATTAAGCNN	NNTACATAATGANN	NNCGCATTAGCGNN	NNTGCGCATCGANN	NNCGTATTAGAANN	NNGTTAATTTGCNN	NNATCTTAAGTANN	NNCCACTTAACGNN	NNGCTCTAAGTANN	NNTCTCTTGCTANN	NNCTCCTTAAANN	NNCCCCTTAAGCNN	NNTCGCCTTAGANN	NNCTCCTTAGTGNN	NNCGGCTTAACTNN	NNACGTTAAGCCNN	NNCATTTAAGTANN	NNGTCTTAACGNN	NNCCTCTCAATGNN	NNCGTCTTAAACNN	NNACTGCAAAAGNN	NNCTAGTTAAANN	NNGCTAGTTATTNN	NNTCCGTTAATANN	NNCGCGTTAGCANN	NNCTCGTTAGGANN	NNGTTAGTTAATNN	NNTCAGGTTAACNN	NNCTGGTTATTGNN	NNGCGGGTTAGANN	NNGAGTTAACTANN	NNCTAGTTAAGANN	NNCCGTGTTAACNN	NNTCCTGTTAAGNN	NNCGTGTTAACGNN
	>1_TTT_RTVAA.321.25	>2_TTT_RTVSA.373.25	>4_TTC_VRVSA.317.25	>5_TTC_TRVAA.564.25	>6_TTA_VRVAA.1257.25	>7_TTA_RVLRA.675.25	>8_TGT_RVVSQ.526.25	>9_TGG_KTTQD.1209.25	>10_TGG_KSVMQ.696.25	>11_TGA_KSVAQ.1034.25	>12_TGA_RGVAA.818.25	>13_TCT_ATVKA.853.25	>14_TCG_KGTQM.746.25	>15_TCC_RMIKS.331.25	>17_TAT_TRVSA.370.25	>18_TAG_RLTQA.588.25	>19_TAG_RMVSA.339.25	>20_TAC_QRVSA.577.25	>21_TAC_ERVSV.790.25	>22_TAA_RITAA.878.25	>23_GTT_GTRAY.557.25	>24_GTG_HLIQY.252.25	>25_GTA_YTRQV.484.25	>26_GGT_ALKNM.673.25	>27_GGT_LTKDQ.1622.25	>28_GGG_RSKER.2081.25	>29_GGC_TLKNQ.1289.25	>30_GGA_LAKDQ.989.25	>31_GCT_KITKF.472.25	>32_GCC_VRLKY.299.25	>33_GCA_ALRQQ.278.25	>34_GAT_RTMRY.487.25	>35_GAG_VMRWY.304.25	>36_GAC_ATRRF.529.25	>37_GAA_RFQKF.454.25	>38_CTA_LHYAK.784.25	>39_CTA_IFNAK.973.25	>40_CGG_STRER.383.25	>41_CGC_RVMSR.351.25	>42_CGA_TFYAA.502.25	>43_CCT_MTNGK.720.25	>44_CCT_RGDSK.1355.25	>45_CCG_RCYEK.973.25	>46_CCC_RLDSK.856.25	>47_CCA_KMTQK.1723.25	>48_CCA_EHNAK.2018.25	>49_CAT_LSQSR.637.25	>51_CAG_MSHWR.629.25	>52_CAC_LGMRR.808.25
	NNCTCATTATGANN	NNTCATTAGTGNN	NNCTCATTAGTGNN	NNTCCTTAATTANN	NNGCTAATTAACNN	NNTCGCTAATTANN	NNCGGCTTAATGNN	NNGCCCATTAGTCNN	NNCCCATTATGANN	NNTCATTAGTGNN	NNCTCATTATGANN	NNCGGATTATCANN	NNTCAATTAGTGNN	NNTACTTAATCCNN	NNTGCATTAATGNN	NNCCTATTAATGNN	NNCTTGTTAATANN	NNCGTATTAAANN	NNGCGCATTAACNN	NNCTCATTAGCGNN	NNATTCTAAGTANN	NNCCACTTAAANN	NNTTACTAAGTANN	NNACGCCTTAAANN	NNCTCCTTAATNN	NNCCCCTTAAAGNN	NNCGCCTTAACNN	NNCTCCTTACAGNN	NNCGTCTTAAGGNN	NNGGCTTAAGCCNN	NNTGCGCATCGANN	NNCGTCTTAACANN	NNACCTCTCAAANN	NNCGTCTTAGTCNN	NNGGTTCTTAATNN	NNCTAGTTAGTNN	NNGCTAGTTAGTNN	NNCCCGTTAAAGNN	NNCGTGTTAGTCNN	NNCTCGTTAGGGNN	NNCTTGGTTAAGNN	NNGCCTAACCCGNN	NNGCCGGTTAATNN	NNCGGGTTAGTGNN	NNGCCTTAACCANN	NNGCTGGTTACCNN	NNCTTGTTAAGANN	NNGCCTGTTATANN	NNTCGTGTTAACNN
	>1_TTT_RTVAA.319.26	>2_TTT_RTVSA.357.26	>4_TTC_VRVSA.310.26	>5_TTC_TRVAA.555.26	>6_TTA_VRVAA.1234.26	>7_TTA_RVLRA.648.26	>8_TGT_RVVSQ.506.26	>9_TGG_KTTQD.1206.26	>10_TGG_KSVMQ.669.26	>11_TGA_KSVAQ.1000.26	>12_TGA_RGVAA.790.26	>13_TCT_ATVKA.840.26	>14_TCG_KGTQM.718.26	>15_TCC_RMIKS.331.26	>17_TAT_TRVSA.361.26	>18_TAG_RLTQA.575.26	>19_TAG_RMVSA.321.26	>20_TAC_QRVSA.542.26	>21_TAC_ERVSV.772.26	>22_TAA_RITAA.876.26	>23_GTT_GTRAY.554.26	>24_GTG_HLIQY.238.26	>25_GTA_YTRQV.472.26	>26_GGT_ALKNM.639.26	>27_GGT_LTKDQ.1579.26	>28_GGG_RSKER.2030.26	>29_GGC_TLKNQ.1229.26	>30_GGA_LAKDQ.988.26	>31_GCT_KITKF.429.26	>32_GCC_VRLKY.281.26	>33_GCA_ALRQQ.277.26	>34_GAT_RTMRY.467.26	>35_GAG_VMRWY.296.26	>36_GAC_ATRRF.527.26	>37_GAA_RFQKF.452.26	>38_CTA_LHYAK.721.26	>39_CTA_IFNAK.953.26	>40_CGG_STRER.378.26	>41_CGC_RVMSR.346.26	>42_CGA_TFYAA.493.26	>43_CCT_MTNGK.712.26	>44_CCT_RGDSK.1338.26	>45_CCG_RCYEK.961.26	>46_CCC_RLDSK.812.26	>47_CCA_KMTQK.1705.26	>48_CCA_EHNAK.1902.26	>49_CAT_LSQSR.616.26	>51_CAG_MSHWR.619.26	>52_CAC_LGMRR.808.26
	NNCTAATTAACANN	NNCTTGTTAATANN	NNCGCATTAGCGNN	NNCTCATTAGTGNN	NNCTAATTAAGGNN	NNGTCCTAATTANN	NNCCCATTAATGNN	NNCCCATTATCANN	NNTCCATTAGTANN	NNCTCATTAGGGNN	NNCTAATTAGAGNN	NNACGTTAATCCNN	NNGCCCATTAACNN	NNCGGATTAGGTNN	NNGCATTAGCANN	NNCTAATTAATGNN	NNGCATTAGCANN	NNCGAATTAATANN	NNCGCATTAAGCNN	NNCTAATTAGAGNN	NNCGCTTAAGTANN	NNGTCCTAAGTGNN	NNATTCTAAGTANN	NNACGCCTTAACNN	NNCTCCTTACAGNN	NNCCCCTTAACNN	NNTCCTGACAGTNN	NNTCTCCTTAAANN	NNCGGCTTAGTGNN	NNCTCTTAAGCCNN	NNGTTCTAAGTANN	NNAGTTCTTAAGNN	NNCCCTCTTAAGNN	NNCGTCTCAAGANN	NNGGTTCTTACANN	NNTCTAGTTAACNN	NNCCTCGTTAAANN	NNCTCCGTTAGTNN	NNCATGTTAATGNN	NNGCTCGTTTACNN	NNGTTGGTTATGNN	NNGCTGGTTAACNN	NNGCTGAGACATNN	NNACGGGTTAAGNN	NNTGCGCATCGANN	NNGCTGGTTATANN	NNAGCCTTAACANN	NNCCTGTTAGTTNN	NNCTGTGTTAACNN
	>1_TTT_RTVAA.314.27	>2_TTT_RTVSA.354.27	>4_TTC_VRVSA.303.27	>5_TTC_TRVAA.549.27	>6_TTA_VRVAA.1216.27	>7_TTA_RVLRA.625.27	>8_TGT_RVVSQ.497.27	>9_TGG_KTTQD.1147.27	>10_TGG_KSVMQ.662.27	>11_TGA_KSVAQ.975.27	>12_TGA_RGVAA.756.27	>13_TCT_ATVKA.834.27	>14_TCG_KGTQM.588.27	>15_TCC_RMIKS.330.27	>17_TAT_TRVSA.351.27	>18_TAG_RLTQA.572.27	>19_TAG_RMVSA.308.27	>20_TAC_QRVSA.540.27	>21_TAC_ERVSV.764.27	>22_TAA_RITAA.823.27	>23_GTT_GTRAY.551.27	>24_GTG_HLIQY.232.27	>25_GTA_YTRQV.472.27	>26_GGT_ALKNM.638.27	>27_GGT_LTKDQ.1463.27	>28_GGG_RSKER.1994.27	>29_GGC_TLKNQ.1224.27	>30_GGA_LAKDQ.976.27	>31_GCT_KITKF.426.27	>32_GCC_VRLKY.279.27	>33_GCA_ALRQQ.275.27	>34_GAT_RTMRY.460.27	>35_GAG_VMRWY.285.27	>36_GAC_ATRRF.508.27	>37_GAA_RFQKF.427.27	>38_CTA_LHYAK.718.27	>39_CTA_IFNAK.924.27	>40_CGG_STRER.375.27	>41_CGC_RVMSR.334.27	>42_CGA_TFYAA.463.27	>43_CCT_MTNGK.698.27	>44_CCT_RGDSK.1271.27	>45_CCG_RCYEK.927.27	>46_CCC_RLDSK.702.27	>47_CCA_KMTQK.1701.27	>48_CCA_EHNAK.1887.27	>49_CAT_LSQSR.610.27	>51_CAG_MSHWR.593.27	>52_CAC_LGMRR.784.27
	NNCTCATTAGCGNN	NNCATATTAATGNN	NNGCTAATTAACNN	NNCTAATTAAGTNN	NNCTTATTAGCGNN	NNGTTAATTAAANN	NNGCCACTAATGNN	NNGTCCATTAGTNN	NNCTCATTAAGGNN	NNCTCATTATAANN	NNCTAATTAGTANN	NNCGGATTAAGTNN	NNTCCCATTAAGNN	NNCGGATTAACANN	NNCATATTAATANN	NNCTCATTAGTGNN	NNCGCATTAAAGNN	NNGCTAATTAATNN	NNTGTATTAGTGNN	NNCTCATTAATANN	NNCTACTTAACGNN	NNTCTCTAAGTGNN	NNCTACTTATCANN	NNGCACCTTAGANN	NNCTCCTTAGTGNN	NNTCCCTTAAANN	NNCGCCTTAGAGNN	NNCTCCTTAAGANN	NNCGGCTTAGATNN	NNTGGCTAAGCCNN	NNGGTTTAAGTANN	NNAGGGTTAAGANN	NNGCCTCTTAGGNN	NNCGTCTTGAACNN	NNGGAAGGGAACNN	NNCCTAGTTAACNN	NNACTAGTTAGANN	NNCCCCGTTAAGNN	NNCGCGTTAACANN	NNACTCGTTACGNN	NNGGTGGTTAACNN	NNTCTGGTCAACNN	NNCCGGTTAGCANN	NNCCGGGTTACANN	NNTCCTGACAGTNN	NNGCTGGTTAATNN	NNCCATGTTAAANN	NNCCTGTTATGANN	NNCGTGTTAAGTNN
	>1_TTT_RTVAA.313.28	>2_TTT_RTVSA.332.28	>4_TTC_VRVSA.299.28	>5_TTC_TRVAA.538.28	>6_TTA_VRVAA.1202.28	>7_TTA_RVLRA.621.28	>8_TGT_RVVSQ.486.28	>9_TGG_KTTQD.1113.28	>10_TGG_KSVMQ.648.28	>11_TGA_KSVAQ.942.28	>12_TGA_RGVAA.746.28	>13_TCT_ATVKA.802.28	>14_TCG_KGTQM.580.28	>15_TCC_RMIKS.330.28	>17_TAT_TRVSA.342.28	>18_TAG_RLTQA.559.28	>19_TAG_RMVSA.305.28	>20_TAC_QRVSA.539.28	>21_TAC_ERVSV.709.28	>22_TAA_RITAA.808.28	>23_GTT_GTRAY.547.28	>24_GTG_HLIQY.229.28	>25_GTA_YTRQV.457.28	>26_GGT_ALKNM.637.28	>27_GGT_LTKDQ.1398.28	>28_GGG_RSKER.1929.28	>29_GGC_TLKNQ.1170.28	>30_GGA_LAKDQ.969.28	>31_GCT_KITKF.388.28	>32_GCC_VRLKY.278.28	>33_GCA_ALRQQ.268.28	>34_GAT_RTMRY.453.28	>35_GAG_VMRWY.285.28	>36_GAC_ATRRF.485.28	>37_GAA_RFQKF.417.28	>38_CTA_LHYAK.705.28	>39_CTA_IFNAK.912.28	>40_CGG_STRER.372.28	>41_CGC_RVMSR.327.28	>42_CGA_TFYAA.458.28	>43_CCT_MTNGK.670.28	>44_CCT_RGDSK.1220.28	>45_CCG_RCYEK.919.28	>46_CCC_RLDSK.677.28	>47_CCA_KMTQK.1653.28	>48_CCA_EHNAK.1838.28	>49_CAT_LSQSR.609.28	>51_CAG_MSHWR.572.28	>52_CAC_LGMRR.765.28
	NNCTAATTATTANN	NNTTGCATACCANN	NNTGCGTTAATANN	NNCTAATTAGTANN	NNGTCCAGATTGNN	NNTAATTAACANN	NNCGCGATAATGNN	NNGCCCATTATCNN	NNTGCATTAGTGNN	NNCTCATTAAAGNN	NNCTCATTAATTNN	NNAGGATTAGGANN	NNATTCCGCTCTNN	NNAGGATTAGAGNN	NNCGTGTTAGTNN	NNCCAATTATAGNN	NNCGCATTATGGNN	NNCGCATTAGAGNN	NNCGTATTACAANN	NNCTCATTAAANN	NNCTACTTAGCANN	NNCCACTTAGGTNN	NNCTACTTAAACNN	NNCGCCTTAGGGNN	NNCTCCTTAATCNN	NNCCCCTTAAGGNN	NNGCGCCTTACANN	NNTTCCTTAGGGNN	NNTTCTTAAGCCNN	NNGTGTTAAGCCNN	NNCGCTTAAGTANN	NNCGTCTTAGAANN	NNCCTCTTAATANN	NNCGTCTTAAATNN	NNGGTTCTTATANN	NNGCTAGTTACTNN	NNACTCGTTAAANN	NNTCCGTTAGTANN	NNCTTGTTAAGANN	NNCTCGTTAAGGNN	NNTTAGGTTAACNN	NNACGGGTTAAGNN	NNCCAGTTAAGANN	NNTCGGGTTAATNN	NNCCCTTAACCANN	NNACTGGTTAGTNN	NNGCCTTAACANN	NNCCTGTTAGCTNN	NNGTGTGTCATANN
	>1_TTT_RTVAA.309.29	>2_TTT_RTVSA.328.29	>4_TTC_VRVSA.297.29	>5_TTC_TRVAA.518.29	>6_TTA_VRVAA.1193.29	>7_TTA_RVLRA.614.29	>8_TGT_RVVSQ.484.29	>9_TGG_KTTQD.1094.29	>10_TGG_KSVMQ.595.29	>11_TGA_KSVAQ.930.29	>12_TGA_RGVAA.731.29	>13_TCT_ATVKA.760.29	>14_TCG_KGTQM.566.29	>15_TCC_RMIKS.329.29	>17_TAT_TRVSA.340.29	>18_TAG_RLTQA.553.29	>19_TAG_RMVSA.293.29	>20_TAC_QRVSA.523.29	>21_TAC_ERVSV.676.29	>22_TAA_RITAA.789.29	>23_GTT_GTRAY.534.29	>24_GTG_HLIQY.227.29	>25_GTA_YTRQV.450.29	>26_GGT_ALKNM.593.29	>27_GGT_LTKDQ.1380.29	>28_GGG_RSKER.1879.29	>29_GGC_TLKNQ.1167.29	>30_GGA_LAKDQ.966.29	>31_GCT_KITKF.386.29	>32_GCC_VRLKY.276.29	>33_GCA_ALRQQ.255.29	>34_GAT_RTMRY.441.29	>35_GAG_VMRWY.284.29	>36_GAC_ATRRF.472.29	>37_GAA_RFQKF.413.29	>38_CTA_LHYAK.691.29	>39_CTA_IFNAK.901.29	>40_CGG_STRER.369.29	>41_CGC_RVMSR.322.29	>42_CGA_TFYAA.427.29	>43_CCT_MTNGK.652.29	>44_CCT_RGDSK.1156.29	>45_CCG_RCYEK.861.29	>46_CCC_RLDSK.666.29	>47_CCA_KMTQK.1626.29	>48_CCA_EHNAK.1830.29	>49_CAT_LSQSR.603.29	>51_CAG_MSHWR.569.29	>52_CAC_LGMRR.763.29
	NNCTCATTAATANN	NNCTAATTAACANN	NNCGTATTACAANN	NNGCTAATTAAANN	NNCCTAATTAAGNN	NNGCTAATTAACNN	NNCGCGCTAATGNN	NNGCCCATTAAANN	NNGATGGTGAAANN	NNCTCATTAAGTNN	NNCTAATTAAAGNN	NNTTCTTAATCCNN	NNTCCATTAAGGNN	NNTCCTTAATCCNN	NNCGTATTATCANN	NNCCAATTAATNN	NNTCACATTAACNN	NNTGTATTAATANN	NNGCGTATTATANN	NNCTAATTATTANN	NNAACTACTTAAGNN	NNCCCACTTAAGNN	NNGTCCTAAGTANN	NNTCGCCTTAACNN	NNCTCCTTTAGANN	NNCTCCCTTAAANN	NNGCGCCTTAGTNN	NNCTCCTTAATGNN	NNCGGCTTAAGGNN	NNCGTCTTAGAGNN	NNCTTTTAAGTANN	NNCTACTTAAGANN	NNCCTCTCAAAGNN	NNCGTCTTACACNN	NNCTTCTTAAGGNN	NNGCTAGTTAGCNN	NNACTCGTTAGANN	NNCCCGTTCGTGNN	NNGCCCTTAACANN	NNCTCGTTATCANN	NNGATGGTTAACNN	NNCGGGTTAGCANN	NNCCGGTTAAGGNN	NNGCTGGTTAACNN	NNTTCTTAACTANN	NNTCTAGTTAAANN	NNTCCTGACAGTNN	NNGCCTGTCAAGNN	NNAGTGCTTCACNN
	>1_TTT_RTVAA.302.30	>2_TTT_RTVSA.322.30	>4_TTC_VRVSA.287.30	>5_TTC_TRVAA.511.30	>6_TTA_VRVAA.1165.30	>7_TTA_RVLRA.587.30	>8_TGT_RVVSQ.481.30	>9_TGG_KTTQD.1013.30	>10_TGG_KSVMQ.578.30	>11_TGA_KSVAQ.869.30	>12_TGA_RGVAA.705.30	>13_TCT_ATVKA.752.30	>14_TCG_KGTQM.517.30	>15_TCC_RMIKS.325.30	>17_TAT_TRVSA.339.30	>18_TAG_RLTQA.550.30	>19_TAG_RMVSA.277.30	>20_TAC_QRVSA.521.30	>21_TAC_ERVSV.668.30	>22_TAA_RITAA.780.30	>23_GTT_GTRAY.534.30	>24_GTG_HLIQY.226.30	>25_GTA_YTRQV.446.30	>26_GGT_ALKNM.592.30	>27_GGT_LTKDQ.1358.30	>28_GGG_RSKER.1825.30	>29_GGC_TLKNQ.1153.30	>30_GGA_LAKDQ.954.30	>31_GCT_KITKF.381.30	>32_GCC_VRLKY.276.30	>33_GCA_ALRQQ.253.30	>34_GAT_RTMRY.441.30	>35_GAG_VMRWY.280.30	>36_GAC_ATRRF.470.30	>37_GAA_RFQKF.397.30	>38_CTA_LHYAK.687.30	>39_CTA_IFNAK.877.30	>40_CGG_STRER.310.30	>41_CGC_RVMSR.316.30	>42_CGA_TFYAA.409.30	>43_CCT_MTNGK.644.30	>44_CCT_RGDSK.1079.30	>45_CCG_RCYEK.836.30	>46_CCC_RLDSK.650.30	>47_CCA_KMTQK.1506.30	>48_CCA_EHNAK.1770.30	>49_CAT_LSQSR.588.30	>51_CAG_MSHWR.566.30	>52_CAC_LGMRR.748.30
	NNTTCATTAATANN	NNTGCGTTAATANN	NNCGTATTAACTNN	NNGCTTTAATTANN	NNCTAATTACACNN	NNCTGTTAATTANN	NNCTCATTAGCGNN	NNCCCATTAAAGNN	NNTCATTAGTANN	NNCTCATTAGGANN	NNGCTAATTAAANN	NNCGGATTAGGTNN	NNCCAATTAGCANN	NNAGGGATTAGTNN	NNCGCATTAATTNN	NNCCAATTAGCGNN	NNGCTAATTAAANN	NNCGTATTAAACNN	NNCGTATTATAANN	NNCTAATTAAGANN	NNTCACTAAGTANN	NNCCGTTAAGTGNN	NNTGCGTAAGTANN	NNGCGCCTTATGNN	NNTTCCTTAGCANN	NNCCCCTTAGAANN	NNGCGCCTTAACNN	NNTTCTTAAGGANN	NNCGGCTTACGANN	NNCGTCTAAGCCNN	NNATTCTAAGTANN	NNCGTCTTAGTANN	NNCCTCTCCAAGNN	NNCGTCTTACGCNN	NNGCTACTTATGNN	NNCTAGTTAAGGNN	NNCCTAGTTAGTNN	NNTCCGTTAAGNN	NNCGCGTTAATCNN	NNCTCGTTAGAANN	NNAAAGGTTAAANN	NNGCGGGTTATGNN	NNTTCGGTTAATNN	NNTCAGGTTAACNN	NNGCTAGTTAAGNN	NNGCTGGTTAGANN	NNATCAGTCCTTNN	NNCTGTTAACGNN	NNCTGTGTTAAGNN
	>1_TTT_RTVAA.297.31	>2_TTT_RTVSA.293.31	>4_TTC_VRVSA.282.31	>5_TTC_TRVAA.481.31	>6_TTA_VRVAA.1159.31	>7_TTA_RVLRA.577.31	>8_TGT_RVVSQ.473.31	>9_TGG_KTTQD.998.31	>10_TGG_KSVMQ.535.31	>11_TGA_KSVAQ.867.31	>12_TGA_RGVAA.704.31	>13_TCT_ATVKA.734.31	>14_TCG_KGTQM.501.31	>15_TCC_RMIKS.325.31	>17_TAT_TRVSA.337.31	>18_TAG_RLTQA.546.31	>19_TAG_RMVSA.276.31	>20_TAC_QRVSA.465.31	>21_TAC_ERVSV.660.31	>22_TAA_RITAA.730.31	>23_GTT_GTRAY.528.31	>24_GTG_HLIQY.217.31	>25_GTA_YTRQV.445.31	>26_GGT_ALKNM.566.31	>27_GGT_LTKDQ.1341.31	>28_GGG_RSKER.1823.31	>29_GGC_TLKNQ.1149.31	>30_GGA_LAKDQ.882.31	>31_GCT_KITKF.375.31	>32_GCC_VRLKY.261.31	>33_GCA_ALRQQ.245.31	>34_GAT_RTMRY.413.31	>35_GAG_VMRWY.278.31	>36_GAC_ATRRF.465.31	>37_GAA_RFQKF.345.31	>38_CTA_LHYAK.678.31	>39_CTA_IFNAK.796.31	>40_CGG_STRER.293.31	>41_CGC_RVMSR.312.31	>42_CGA_TFYAA.400.31	>43_CCT_MTNGK.603.31	>44_CCT_RGDSK.1076.31	>45_CCG_RCYEK.833.31	>46_CCC_RLDSK.609.31	>47_CCA_KMTQK.1425.31	>48_CCA_EHNAK.1737.31	>49_CAT_LSQSR.572.31	>51_CAG_MSHWR.564.31	>52_CAC_LGMRR.730.31
	NNCTCATTAAANN	NNTCCTGACAGTNN	NNCTAATTAATGNN	NNCTAATTAATANN	NNCCTAATTATANN	NNGTCTTAATTANN	NNGGTCTTAATGNN	NNGCCCATTAGANN	NNCGCATTATGGNN	NNCTCATTAACANN	NNTTAATTAAGANN	NNTGGATAATCCNN	NNCTCATTAGTGNN	NNCCGGATTAACNN	NNGGTAAAGCATNN	NNCCAATTACTANN	NNTACATAATGANN	NNCTAATTAGCANN	NNGCGTATTAATNN	NNCTCATTAACANN	NNTGTCTAAGTANN	NNCCACTTAAGTNN	NNTCTTTAAGTANN	NNCGCCTTAAACNN	NNCCTCCTTAAGNN	NNCCCCTTAATNN	NNGCCTTAACANN	NNCTTCCTTAAANN	NNCGGCTTAATCNN	NNGCCTTAAGCCNN	NNTTATTAAGTANN	NNCGTCTTAGGCNN	NNCCTCTTACGANN	NNCGTCTTAGCTNN	NNCTTCTTAACANN	NNCTAGTTAACCNN	NNCCTCGTTAGTNN	NNCCGTTAATANN	NNCCGCGTTAAANN	NNTCGTTAGTGNN	NNGGAGGTTAAGNN	NNCCGGGTTATGNN	NNTCGGTTAGTGNN	NNCGGGTTAGTNN	NNCCTAGTTAATNN	NNTCCTGACAGTNN	NNTCGGTTAACANN	NNCCTGTTTAGANN	NNCCGTGTTAATNN
	>1_TTT_RTVAA.296.32	>2_TTT_RTVSA.291.32	>4_TTC_VRVSA.277.32	>5_TTC_TRVAA.477.32	>6_TTA_VRVAA.1133.32	>7_TTA_RVLRA.572.32	>8_TGT_RVVSQ.467.32	>9_TGG_KTTQD.921.32	>10_TGG_KSVMQ.528.32	>11_TGA_KSVAQ.843.32	>12_TGA_RGVAA.678.32	>13_TCT_ATVKA.692.32	>14_TCG_KGTQM.494.32	>15_TCC_RMIKS.324.32	>17_TAT_TRVSA.330.32	>18_TAG_RLTQA.520.32	>19_TAG_RMVSA.267.32	>20_TAC_QRVSA.464.32	>21_TAC_ERVSV.655.32	>22_TAA_RITAA.675.32	>23_GTT_GTRAY.488.32	>24_GTG_HLIQY.206.32	>25_GTA_YTRQV.426.32	>26_GGT_ALKNM.550.32	>27_GGT_LTKDQ.1323.32	>28_GGG_RSKER.1684.32	>29_GGC_TLKNQ.1089.32	>30_GGA_LAKDQ.881.32	>31_GCT_KITKF.372.32	>32_GCC_VRLKY.257.32	>33_GCA_ALRQQ.242.32	>34_GAT_RTMRY.412.32	>35_GAG_VMRWY.272.32	>36_GAC_ATRRF.445.32	>37_GAA_RFQKF.331.32	>38_CTA_LHYAK.666.32	>39_CTA_IFNAK.770.32	>40_CGG_STRER.290.32	>41_CGC_RVMSR.307.32	>42_CGA_TFYAA.398.32	>43_CCT_MTNGK.584.32	>44_CCT_RGDSK.885.32	>45_CCG_RCYEK.832.32	>46_CCC_RLDSK.588.32	>47_CCA_KMTQK.1351.32	>48_CCA_EHNAK.1664.32	>49_CAT_LSQSR.565.32	>51_CAG_MSHWR.552.32	>52_CAC_LGMRR.729.32
	NNCTAATTAACCNN	NNCGCATTAAAGNN	NNGTTAATTAACNN	NNCGACTAATTANN	NNCCTAATTAGGNN	NNCCCCTAATTANN	NNTGCGCATCGANN	NNTCCCATTAAANN	NNCTCATTATCANN	NNCTCATTAAGGNN	NNCTCATTAGCGNN	NNACACTAATCCNN	NNAACCTCCGATNN	NNCGGATTAAGTNN	NNCGTATTAAAGNN	NNCCAATTAATGNN	NNCACATTAGGGNN	NNCGTATTAAAGNN	NNCGTATTAAATNN	NNCTTGTTAATANN	NNAGCCTAAGTANN	NNGCCACTTACANN	NNCTACTTAGCANN	NNCGCCTTAACANN	NNCTCCTTAAACNN	NNGCCCCTTAAANN	NNCGCCTTAGTANN	NNCTCCTTAAACNN	NNCGTTCTTTAANN	NNTGTCTTAAGANN	NNCACCTAAGTANN	NNCGTCTTAGTCNN	NNGCCTCTTCACNN	NNCGTCTTATGANN	NNGCTTCTTATGNN	NNGCTGGTTAAANN	NNGCTAGTTAGCNN	NNTCCGTTAGTGNN	NNAGCCTTAACANN	NNCCTCGTTAGANN	NNGTCGGTCATANN	NNCGGGTTATTANN	NNCGGTTAGTTNN	NNCGGGTTAACGNN	NNCCTAGTTAAGNN	NNCCTAGTTAAANN	NNTAACTTAACANN	NNTCCTGACAGTNN	NNTGTGTTATGGNN
	>1_TTT_RTVAA.286.33	>2_TTT_RTVSA.290.33	>4_TTC_VRVSA.272.33	>5_TTC_TRVAA.464.33	>6_TTA_VRVAA.1113.33	>7_TTA_RVLRA.564.33	>8_TGT_RVVSQ.448.33	>9_TGG_KTTQD.899.33	>10_TGG_KSVMQ.507.33	>11_TGA_KSVAQ.819.33	>12_TGA_RGVAA.667.33	>13_TCT_ATVKA.690.33	>14_TCG_KGTQM.450.33	>15_TCC_RMIKS.314.33	>17_TAT_TRVSA.328.33	>18_TAG_RLTQA.502.33	>19_TAG_RMVSA.263.33	>20_TAC_QRVSA.458.33	>21_TAC_ERVSV.655.33	>22_TAA_RITAA.670.33	>23_GTT_GTRAY.485.33	>24_GTG_HLIQY.198.33	>25_GTA_YTRQV.417.33	>26_GGT_ALKNM.540.33	>27_GGT_LTKDQ.1216.33	>28_GGG_RSKER.1681.33	>29_GGC_TLKNQ.1063.33	>30_GGA_LAKDQ.880.33	>31_GCT_KITKF.372.33	>32_GCC_VRLKY.254.33	>33_GCA_ALRQQ.242.33	>34_GAT_RTMRY.384.33	>35_GAG_VMRWY.256.33	>36_GAC_ATRRF.429.33	>37_GAA_RFQKF.326.33	>38_CTA_LHYAK.665.33	>39_CTA_IFNAK.742.33	>40_CGG_STRER.285.33	>41_CGC_RVMSR.305.33	>42_CGA_TFYAA.386.33	>43_CCT_MTNGK.580.33	>44_CCT_RGDSK.862.33	>45_CCG_RCYEK.759.33	>46_CCC_RLDSK.569.33	>47_CCA_KMTQK.1333.33	>48_CCA_EHNAK.1620.33	>49_CAT_LSQSR.558.33	>51_CAG_MSHWR.548.33	>52_CAC_LGMRR.718.33
	NNCTAATTAGTANN	NNTTCATTAATANN	NNCTAATTAGCANN	NNTCACTAATTANN	NNCTAATTAACANN	NNACTTTAATTANN	NNCGCATTAGCGNN	NNCCCATTATGGNN	NNTCATTAGTGNN	NNCTAATTAATANN	NNCTCATTAGTANN	NNCGGATTAGTTNN	NNTCCATTAATTNN	NNGCGGATTAGTNN	NNCGTATTATAANN	NNGCTAATTAACNN	NNTGCATTAATGNN	NNCGTATTATAANN	NNGCGTATTAGCNN	NNCTAATTAGGTNN	NNCCTACTTACGNN	NNGCCACTTAAANN	NNTCACTAAGTANN	NNGCGCCTTAGTNN	NNCTCCTTAACNN	NNGTCCCTTAAANN	NNCGCCTTAAGGNN	NNTTCCTTAATTNN	NNCGTCTTAACNN	NNCGTCTTAATANN	NNACGTTAAGTANN	NNAGTGCTTCACNN	NNCCCTCTTAAANN	NNCGTCTCAACGNN	NNGCTTCTTAGANN	NNCTAGTTAAACNN	NNCTAGTTAGCANN	NNCCCGTTAAGCNN	NNCGTGTTAGGGNN	NNCCTCGTTATGNN	NNTTTGGTTAAGNN	NNACGGGTTAACNN	NNCCGGTTAGCGNN	NNCCGGGTTAGANN	NNGTCCAGATCANN	NNCCTAGTTAACNN	NNTTTCTTAACANN	NNCCTGTTAATANN	NNGTGTGTCAAANN
	>1_TTT_RTVAA.280.34	>2_TTT_RTVSA.284.34	>4_TTC_VRVSA.270.34	>5_TTC_TRVAA.439.34	>6_TTA_VRVAA.990.34	>7_TTA_RVLRA.564.34	>8_TGT_RVVSQ.446.34	>9_TGG_KTTQD.888.34	>10_TGG_KSVMQ.494.34	>11_TGA_KSVAQ.819.34	>12_TGA_RGVAA.652.34	>13_TCT_ATVKA.681.34	>14_TCG_KGTQM.447.34	>15_TCC_RMIKS.305.34	>17_TAT_TRVSA.310.34	>18_TAG_RLTQA.493.34	>19_TAG_RMVSA.259.34	>20_TAC_QRVSA.458.34	>21_TAC_ERVSV.650.34	>22_TAA_RITAA.638.34	>23_GTT_GTRAY.475.34	>24_GTG_HLIQY.193.34	>25_GTA_YTRQV.414.34	>26_GGT_ALKNM.526.34	>27_GGT_LTKDQ.1180.34	>28_GGG_RSKER.1681.34	>29_GGC_TLKNQ.1059.34	>30_GGA_LAKDQ.819.34	>31_GCT_KITKF.366.34	>32_GCC_VRLKY.250.34	>33_GCA_ALRQQ.241.34	>34_GAT_RTMRY.373.34	>35_GAG_VMRWY.250.34	>36_GAC_ATRRF.425.34	>37_GAA_RFQKF.325.34	>38_CTA_LHYAK.644.34	>39_CTA_IFNAK.734.34	>40_CGG_STRER.258.34	>41_CGC_RVMSR.288.34	>42_CGA_TFYAA.360.34	>43_CCT_MTNGK.568.34	>44_CCT_RGDSK.842.34	>45_CCG_RCYEK.750.34	>46_CCC_RLDSK.569.34	>47_CCA_KMTQK.1312.34	>48_CCA_EHNAK.1555.34	>49_CAT_LSQSR.539.34	>51_CAG_MSHWR.532.34	>52_CAC_LGMRR.713.34
	NNGTTCATTAAANN	NNCTCATTAAGANN	NNCGTATTAAAGNN	NNCTGCTAATTANN	NNCTAATTACAGNN	NNTCCTTAATTANN	NNTCCGTTAATGNN	NNCCCCATTAAGNN	NNCGCATTAATANN	NNCTCATTAGAGNN	NNCTAATTAAGANN	NNCGGATTAAAGNN	NNTCCCATTAACNN	NNGGGGATTATCNN	NNCTAATTAATGNN	NNCCAATTATTGNN	NNCACATTAGCANN	NNCATATTAATANN	NNCGTATTATTGNN	NNCCTAATTAAGNN	NNTCGCTAAGTANN	NNGTCTTAAGTGNN	NNCTACTTAATNN	NNGGTAAAGCATNN	NNCCTCCTTAAANN	NNACCCCTTAAGNN	NNTCGCCTTATGNN	NNTTCCTTAGAANN	NNCGGCTTAAGCNN	NNTCCTTAAGCCNN	NNCTACTTAACANN	NNAGTCTTAAGANN	NNGCCTCTCCATNN	NNCGTCTTAAANN	NNCTTCTTAGCANN	NNCTAGTTAATGNN	NNGCTAGTTAAANN	NNGTCCGTTAAANN	NNCTCCTTAACANN	NNGCTCGTTACANN	NNGTTAGTTAAGNN	NNGCGAGCACTGNN	NNACCAGTTAATNN	NNGCAGGTTAAANN	NNCGCTTAACCANN	NNCCTAGTTAGTNN	NNGTTGTTAACANN	NNCCTGTTAAGCNN	NNGTGTGTCAGCNN
	>1_TTT_RTVAA.278.35	>2_TTT_RTVSA.280.35	>4_TTC_VRVSA.265.35	>5_TTC_TRVAA.432.35	>6_TTA_VRVAA.873.35	>7_TTA_RVLRA.553.35	>8_TGT_RVVSQ.445.35	>9_TGG_KTTQD.876.35	>10_TGG_KSVMQ.491.35	>11_TGA_KSVAQ.803.35	>12_TGA_RGVAA.643.35	>13_TCT_ATVKA.662.35	>14_TCG_KGTQM.433.35	>15_TCC_RMIKS.303.35	>17_TAT_TRVSA.293.35	>18_TAG_RLTQA.468.35	>19_TAG_RMVSA.249.35	>20_TAC_QRVSA.455.35	>21_TAC_ERVSV.645.35	>22_TAA_RITAA.635.35	>23_GTT_GTRAY.468.35	>24_GTG_HLIQY.192.35	>25_GTA_YTRQV.409.35	>26_GGT_ALKNM.516.35	>27_GGT_LTKDQ.1149.35	>28_GGG_RSKER.1619.35	>29_GGC_TLKNQ.1053.35	>30_GGA_LAKDQ.815.35	>31_GCT_KITKF.361.35	>32_GCC_VRLKY.247.35	>33_GCA_ALRQQ.234.35	>34_GAT_RTMRY.356.35	>35_GAG_VMRWY.248.35	>36_GAC_ATRRF.412.35	>37_GAA_RFQKF.322.35	>38_CTA_LHYAK.630.35	>39_CTA_IFNAK.733.35	>40_CGG_STRER.253.35	>41_CGC_RVMSR.281.35	>42_CGA_TFYAA.333.35	>43_CCT_MTNGK.543.35	>44_CCT_RGDSK.835.35	>45_CCG_RCYEK.711.35	>46_CCC_RLDSK.563.35	>47_CCA_KMTQK.1267.35	>48_CCA_EHNAK.1535.35	>49_CAT_LSQSR.517.35	>51_CAG_MSHWR.525.35	>52_CAC_LGMRR.702.35
	NNCTAATTAGACNN	NNGAGGTAAATGNN	NNCGCATTAACGNN	NNGCCTTAATTANN	NNCTAATTATATNN	NNCGACTAATTANN	NNTCTCTTAATGNN	NNTCCATTAAGGNN	NNCTCATTATTANN	NNCTCATTAGACNN	NNTTCATTAATANN	NNCCCTTAATCCNN	NNCCCATTATGGNN	NNCGGATTAGGANN	NNCGCATTAACGNN	NNCTAATTATGANN	NNTTCATTAATANN	NNGCGCATTAATNN	NNCGTATTAAACNN	NNGCTAATTAAANN	NNCTACTTAGCGNN	NNGCCACTTAGCNN	NNCTACTTAGAANN	NNGCGCCTTAACNN	NNGCTCCTTAATNN	NNTCCCTTAAGTNN	NNCCGCCTTAACNN	NNTTCCTTAGGANN	NNGGTCTTAAGCNN	NNCGTCTTAGTGNN	NNTCGCTAAGTANN	NNGTTCTTAAGANN	NNCCTCTTCAACNN	NNCGTCTTAGGTNN	NNGCTTCTTATANN	NNGCTAGTTACANN	NNTCTAGTTAACNN	NNATGCTATCTTNN	NNCATGTTAACGNN	NNCTCGTTAAACNN	NNCCTGGTTAGANN	NNCCCTAACATGNN	NNTCGGTTAGCANN	NNCCGGGTTATGNN	NNGGGTTAACCANN	NNGCTGGTTAAGNN	NNACTCTTAACANN	NNTTCCTGTTAANN	NNCGTGTTAGTNN
	>1_TTT_RTVAA.273.36	>2_TTT_RTVSA.279.36	>4_TTC_VRVSA.260.36	>5_TTC_TRVAA.425.36	>6_TTA_VRVAA.850.36	>7_TTA_RVLRA.548.36	>8_TGT_RVVSQ.439.36	>9_TGG_KTTQD.834.36	>10_TGG_KSVMQ.484.36	>11_TGA_KSVAQ.800.36	>12_TGA_RGVAA.618.36	>13_TCT_ATVKA.655.36	>14_TCG_KGTQM.425.36	>15_TCC_RMIKS.300.36	>17_TAT_TRVSA.289.36	>18_TAG_RLTQA.458.36	>19_TAG_RMVSA.240.36	>20_TAC_QRVSA.439.36	>21_TAC_ERVSV.640.36	>22_TAA_RITAA.598.36	>23_GTT_GTRAY.463.36	>24_GTG_HLIQY.190.36	>25_GTA_YTRQV.407.36	>26_GGT_ALKNM.485.36	>27_GGT_LTKDQ.1106.36	>28_GGG_RSKER.1618.36	>29_GGC_TLKNQ.1024.36	>30_GGA_LAKDQ.772.36	>31_GCT_KITKF.357.36	>32_GCC_VRLKY.243.36	>33_GCA_ALRQQ.231.36	>34_GAT_RTMRY.354.36	>35_GAG_VMRWY.238.36	>36_GAC_ATRRF.410.36	>37_GAA_RFQKF.289.36	>38_CTA_LHYAK.624.36	>39_CTA_IFNAK.712.36	>40_CGG_STRER.253.36	>41_CGC_RVMSR.274.36	>42_CGA_TFYAA.331.36	>43_CCT_MTNGK.526.36	>44_CCT_RGDSK.798.36	>45_CCG_RCYEK.708.36	>46_CCC_RLDSK.559.36	>47_CCA_KMTQK.1254.36	>48_CCA_EHNAK.1519.36	>49_CAT_LSQSR.514.36	>51_CAG_MSHWR.508.36	>52_CAC_LGMRR.694.36
	NNCTAATTACAANN	NNCTCATTAACANN	NNCTCATTAATANN	NNCTGTTAATTANN	NNCTCATTAGTANN	NNCTAATTACGANN	NNCTTGTTAATGNN	NNCCCATTATGCNN	NNTGCCTGGAAANN	NNCTTCATTAAANN	NNGTTAATTAACNN	NNGCGGATTAATNN	NNCCCATTATCANN	NNAGGATTAGTGNN	NNCGTATTAAAANN	NNCCAATTAGAANN	NNCTTGTTAATGNN	NNCTCATTAATGNN	NNCGTATTATCANN	NNCTTGTTAAGANN	NNCTACTTAAGGNN	NNCCACTTAGCANN	NNACGTTAAGTANN	NNGCCTTAACANN	NNTTCCTTAGGGNN	NNTCCCTTAGGGNN	NNGCACCTTACANN	NNCCTCCTTAATNN	NNCGACTTAAGCNN	NNCGTCTTAACGNN	NNGTATTAAGTANN	NNCGTCTTACGANN	NNCCTCTTAACCNN	NNCGTCTTACCNN	NNAGTTCTTAAANN	NNCTAGTTAGTCNN	NNCTAGTTAGTGNN	NNTCCCGTTAAANN	NNCGTGTTAGCGNN	NNCCTCGTTAAGNN	NNCTTAGTTAAGNN	NNCCGGGTTAAANN	NNCTGGTTAACGNN	NNCGGGTTATTANN	NNCTGCTAACTANN	NNAATGGTTAACNN	NNGTCCTTAACANN	NNCCTGTTATATNN	NNGCGTGTTACANN
	>1_TTT_RTVAA.267.37	>2_TTT_RTVSA.279.37	>4_TTC_VRVSA.258.37	>5_TTC_TRVAA.424.37	>6_TTA_VRVAA.841.37	>7_TTA_RVLRA.546.37	>8_TGT_RVVSQ.434.37	>9_TGG_KTTQD.802.37	>10_TGG_KSVMQ.457.37	>11_TGA_KSVAQ.749.37	>12_TGA_RGVAA.598.37	>13_TCT_ATVKA.650.37	>14_TCG_KGTQM.395.37	>15_TCC_RMIKS.297.37	>17_TAT_TRVSA.288.37	>18_TAG_RLTQA.453.37	>19_TAG_RMVSA.233.37	>20_TAC_QRVSA.415.37	>21_TAC_ERVSV.628.37	>22_TAA_RITAA.566.37	>23_GTT_GTRAY.457.37	>24_GTG_HLIQY.190.37	>25_GTA_YTRQV.396.37	>26_GGT_ALKNM.466.37	>27_GGT_LTKDQ.1104.37	>28_GGG_RSKER.1607.37	>29_GGC_TLKNQ.952.37	>30_GGA_LAKDQ.739.37	>31_GCT_KITKF.339.37	>32_GCC_VRLKY.235.37	>33_GCA_ALRQQ.230.37	>34_GAT_RTMRY.346.37	>35_GAG_VMRWY.231.37	>36_GAC_ATRRF.396.37	>37_GAA_RFQKF.286.37	>38_CTA_LHYAK.611.37	>39_CTA_IFNAK.670.37	>40_CGG_STRER.251.37	>41_CGC_RVMSR.274.37	>42_CGA_TFYAA.313.37	>43_CCT_MTNGK.523.37	>44_CCT_RGDSK.767.37	>45_CCG_RCYEK.666.37	>46_CCC_RLDSK.509.37	>47_CCA_KMTQK.1253.37	>48_CCA_EHNAK.1309.37	>49_CAT_LSQSR.513.37	>51_CAG_MSHWR.500.37	>52_CAC_LGMRR.682.37
	NNCTAATTACGANN	NNCGTGTTAATGNN	NNCGTATTAAACNN	NNCTAATTAACANN	NNCTCATTAATGNN	NNTTCATAATTANN	NNGGTGCTAATGNN	NNTCCCATTAATNN	NNCCCATTAGTGNN	NNCTCATTAATTNN	NNCTAATTATTANN	NNGATTTAATCCNN	NNCCAATTAGTANN	NNTGCCTAATCCNN	NNCGTATTAAANN	NNCCAATTATGTNN	NNTACATTAATANN	NNCTAATTAATGNN	NNACGTATTATANN	NNTAATTAGAGNN	NNGACTTAAGTANN	NNGCCACTTATGNN	NNCTACTTAACTNN	NNCCGCCTTAACNN	NNCTCCTTAGACNN	NNCCCCTTAAGTNN	NNGCGCCTTAGGNN	NNTTCCTTAACCNN	NNCTTCTTAAGGNN	NNGTTTTAAGCCNN	NNCTGCTAAGTANN	NNCGTCTTATGANN	NNCCTCTTACAGNN	NNCGTCTTAAGANN	NNGGTTCTTAGANN	NNGCTAGTTAGANN	NNGCTCGTTATANN	NNGCCCGTTAGTNN	NNTTTCTTAACANN	NNGCTCGTTAGTNN	NNCTGGTTAGTGNN	NNTCGGGTTATCNN	NNCGGTTAGGGNN	NNGCTGGTTAAANN	NNACCTTAACCANN	NNCTAGTTAAGGNN	NNTGAGTTAACANN	NNCCTGTTAAAANN	NNGCGTGTCAACNN
	>1_TTT_RTVAA.250.38	>2_TTT_RTVSA.275.38	>4_TTC_VRVSA.249.38	>5_TTC_TRVAA.416.38	>6_TTA_VRVAA.823.38	>7_TTA_RVLRA.544.38	>8_TGT_RVVSQ.413.38	>9_TGG_KTTQD.800.38	>10_TGG_KSVMQ.441.38	>11_TGA_KSVAQ.738.38	>12_TGA_RGVAA.585.38	>13_TCT_ATVKA.646.38	>14_TCG_KGTQM.394.38	>15_TCC_RMIKS.296.38	>17_TAT_TRVSA.276.38	>18_TAG_RLTQA.451.38	>19_TAG_RMVSA.220.38	>20_TAC_QRVSA.412.38	>21_TAC_ERVSV.615.38	>22_TAA_RITAA.559.38	>23_GTT_GTRAY.456.38	>24_GTG_HLIQY.190.38	>25_GTA_YTRQV.392.38	>26_GGT_ALKNM.399.38	>27_GGT_LTKDQ.1092.38	>28_GGG_RSKER.1464.38	>29_GGC_TLKNQ.928.38	>30_GGA_LAKDQ.727.38	>31_GCT_KITKF.338.38	>32_GCC_VRLKY.230.38	>33_GCA_ALRQQ.221.38	>34_GAT_RTMRY.342.38	>35_GAG_VMRWY.227.38	>36_GAC_ATRRF.391.38	>37_GAA_RFQKF.286.38	>38_CTA_LHYAK.551.38	>39_CTA_IFNAK.649.38	>40_CGG_STRER.247.38	>41_CGC_RVMSR.271.38	>42_CGA_TFYAA.310.38	>43_CCT_MTNGK.517.38	>44_CCT_RGDSK.754.38	>45_CCG_RCYEK.664.38	>46_CCC_RLDSK.505.38	>47_CCA_KMTQK.1232.38	>48_CCA_EHNAK.1263.38	>49_CAT_LSQSR.496.38	>51_CAG_MSHWR.487.38	>52_CAC_LGMRR.654.38
	NNTGCTTAATTANN	NNCTAATTAGCGNN	NNCATATTAACANN	NNTCATTAGTANN	NNGCTAATTAAANN	NNTATCTAATTANN	NNGCTCTTAATGNN	NNGTCCATTAACNN	NNCACATTAAGANN	NNTCTCATTAACNN	NNTAATTAATTNN	NNTGCCTAATCCNN	NNGCCCATTAGTCNN	NNGCGGATTATCNN	NNTTATGAAATANN	NNCTAATTAGCGNN	NNTCATTAGTGNN	NNCTCATTAGTGNN	NNGCGTATTATGNN	NNTAGCCACCACNN	NNTCTCTAAGTANN	NNTCACTAAGTGNN	NNAATTTAAGTANN	NNCGCCTTAAGGNN	NNCCTCCTTAATNN	NNTCCCCTTAATNN	NNTCGCCTTAAANN	NNCTCCTTAAGGNN	NNCGGCTTAATANN	NNTGCTAAAGCCNN	NNATTTTAAGTANN	NNCGTCTTAAACNN	NNCCCTCTTATGNN	NNCGTCTTATANN	NNGGTTCTTACGNN	NNCTAGTTAATTNN	NNACTAGTTAAANN	NNGTCCGTTAAGNN	NNCGTGTTAAGTNN	NNCCTCGTTATCNN	NNGGTGGTTAAGNN	NNTGCTCAGGCNN	NNCTCGGTTAGTNN	NNGCGGGTTATANN	NNCCCTTAACTANN	NNTCTAGTTAAGNN	NNAGTGTTAACANN	NNTGTCATAGAGNN	NNGTGTGTTACGNN
	>1_TTT_RTVAA.244.39	>2_TTT_RTVSA.274.39	>4_TTC_VRVSA.247.39	>5_TTC_TRVAA.399.39	>6_TTA_VRVAA.809.39	>7_TTA_RVLRA.541.39	>8_TGT_RVVSQ.412.39	>9_TGG_KTTQD.775.39	>10_TGG_KSVMQ.415.39	>11_TGA_KSVAQ.738.39	>12_TGA_RGVAA.573.39	>13_TCT_ATVKA.646.39	>14_TCG_KGTQM.392.39	>15_TCC_RMIKS.295.39	>17_TAT_TRVSA.274.39	>18_TAG_RLTQA.441.39	>19_TAG_RMVSA.219.39	>20_TAC_QRVSA.402.39	>21_TAC_ERVSV.608.39	>22_TAA_RITAA.545.39	>23_GTT_GTRAY.449.39	>24_GTG_HLIQY.188.39	>25_GTA_YTRQV.383.39	>26_GGT_ALKNM.378.39	>27_GGT_LTKDQ.1088.39	>28_GGG_RSKER.1452.39	>29_GGC_TLKNQ.893.39	>30_GGA_LAKDQ.708.39	>31_GCT_KITKF.335.39	>32_GCC_VRLKY.223.39	>33_GCA_ALRQQ.213.39	>34_GAT_RTMRY.330.39	>35_GAG_VMRWY.227.39	>36_GAC_ATRRF.376.39	>37_GAA_RFQKF.281.39	>38_CTA_LHYAK.537.39	>39_CTA_IFNAK.636.39	>40_CGG_STRER.231.39	>41_CGC_RVMSR.266.39	>42_CGA_TFYAA.296.39	>43_CCT_MTNGK.512.39	>44_CCT_RGDSK.753.39	>45_CCG_RCYEK.659.39	>46_CCC_RLDSK.478.39	>47_CCA_KMTQK.1173.39	>48_CCA_EHNAK.1232.39	>49_CAT_LSQSR.490.39	>51_CAG_MSHWR.483.39	>52_CAC_LGMRR.640.39
	NNGTTCATTAAGNN	NNCATATTAATANN	NNCATATTAATGNN	NNTGCCTAATTANN	NNCTAATTAAGANN	NNTACCTAATTANN	NNCGCATTAACANN	NNACCCATTATANN	NNCGCATTAATGNN	NNTCATTAAGTNN	NNTTCATTAAGGNN	NNGTGCTAATCCNN	NNTCATTAGTGNN	NNGGATTAACGNN	NNCGTATTATTANN	NNGCTTGTTAAGNN	NNCGCATTAACGNN	NNGCATTAGCANN	NNCGCATTAACGNN	NNATGCTATCTTNN	NNCTACTTAATGNN	NNTGCATAAGTGNN	NNTGGTTAAGTANN	NNTCACCTTAAGNN	NNGTCCTTAAGCNN	NNCCCCTTAGANN	NNGCGCCTTTACNN	NNCTCCTTATGNN	NNGTCTTAACGNN	NNTTACTAAGCCNN	NNCACGTAAGTANN	NNCGACTTAAGANN	NNCCTCTTAAAGNN	NNCGTCTTAAGNN	NNGCTACTTAGCNN	NNCTAGTTAATNN	NNACTAGTTATANN	NNGCCCGTTAATNN	NNCGCGTTAATANN	NNTCGTTAGTCNN	NNACAGGTTAACNN	NNGCTGGTTAAGNN	NNCCGGTTATGANN	NNCGGGTTATAANN	NNAGGTTAACCANN	NNGATGGTTAGTNN	NNATGCTATCTTNN	NNCTGTTACGGNN	NNATGTGTTAAGNN
	>1_TTT_RTVAA.241.40	>2_TTT_RTVSA.269.40	>4_TTC_VRVSA.247.40	>5_TTC_TRVAA.398.40	>6_TTA_VRVAA.772.40	>7_TTA_RVLRA.517.40	>8_TGT_RVVSQ.412.40	>9_TGG_KTTQD.664.40	>10_TGG_KSVMQ.410.40	>11_TGA_KSVAQ.711.40	>12_TGA_RGVAA.525.40	>13_TCT_ATVKA.642.40	>14_TCG_KGTQM.385.40	>15_TCC_RMIKS.290.40	>17_TAT_TRVSA.264.40	>18_TAG_RLTQA.430.40	>19_TAG_RMVSA.214.40	>20_TAC_QRVSA.392.40	>21_TAC_ERVSV.592.40	>22_TAA_RITAA.543.40	>23_GTT_GTRAY.442.40	>24_GTG_HLIQY.175.40	>25_GTA_YTRQV.380.40	>26_GGT_ALKNM.372.40	>27_GGT_LTKDQ.1087.40	>28_GGG_RSKER.1427.40	>29_GGC_TLKNQ.891.40	>30_GGA_LAKDQ.695.40	>31_GCT_KITKF.307.40	>32_GCC_VRLKY.220.40	>33_GCA_ALRQQ.206.40	>34_GAT_RTMRY.320.40	>35_GAG_VMRWY.220.40	>36_GAC_ATRRF.360.40	>37_GAA_RFQKF.275.40	>38_CTA_LHYAK.531.40	>39_CTA_IFNAK.631.40	>40_CGG_STRER.210.40	>41_CGC_RVMSR.266.40	>42_CGA_TFYAA.293.40	>43_CCT_MTNGK.511.40	>44_CCT_RGDSK.731.40	>45_CCG_RCYEK.653.40	>46_CCC_RLDSK.417.40	>47_CCA_KMTQK.1164.40	>48_CCA_EHNAK.1165.40	>49_CAT_LSQSR.489.40	>51_CAG_MSHWR.473.40	>52_CAC_LGMRR.604.40
	NNCTAATTAATANN	NNCTCATTAGTANN	NNCTAATTAGCGNN	NNCTCATTAATGNN	NNCTAATTATGCNN	NNCTCATTATTANN	NNGGGCTTAATGNN	NNTCCATTAGTANN	NNCTCATTAACANN	NNCTCATTATAGNN	NNTTCATTAGGGNN	NNACTTTAATCCNN	NNTCAATTAGTANN	NNACTTTAATCCNN	NNGCGTATTAATNN	NNATCAATTAAGNN	NNGTTAATTAACNN	NNTGCATTAATGNN	NNCGTATTATGCNN	NNCCTAATTATCNN	NNTTACTAAGTANN	NNTCCACTTACANN	NNCACCTAAGTANN	NNCGCCTTAAGTNN	NNCTCTTAAGGANN	NNGCCCCTTAGTNN	NNTCGCCTTAGGNN	NNTTCCTTAATCNN	NNCGGCTTAGTANN	NNGTCTTAAGCNN	NNTCTCTAAGTANN	NNCGTCTTAAANN	NNCCTCTTAAGNN	NNCGTCTTAGGCNN	NNACTACTTAATNN	NNCTAGTTATGTNN	NNGCTAGTTACGNN	NNCTCCGTTAAANN	NNGCCTTAACANN	NNCTCGTTAGAGNN	NNGTCGGTTAGTNN	NNCCGGGTTACANN	NNTTCGGTTAAANN	NNACGGGTTAATNN	NNGCTGGTTATANN	NNCTAGTTAAGTNN	NNGGTAAAGCATNN	NNCCTGTTAGTNN	NNTTGTGTTAAGNN
	>1_TTT_RTVAA.241.41	>2_TTT_RTVSA.263.41	>4_TTC_VRVSA.234.41	>5_TTC_TRVAA.397.41	>6_TTA_VRVAA.772.41	>7_TTA_RVLRA.514.41	>8_TGT_RVVSQ.404.41	>9_TGG_KTTQD.659.41	>10_TGG_KSVMQ.400.41	>11_TGA_KSVAQ.708.41	>12_TGA_RGVAA.525.41	>13_TCT_ATVKA.633.41	>14_TCG_KGTQM.380.41	>15_TCC_RMIKS.289.41	>17_TAT_TRVSA.263.41	>18_TAG_RLTQA.422.41	>19_TAG_RMVSA.211.41	>20_TAC_QRVSA.388.41	>21_TAC_ERVSV.507.41	>22_TAA_RITAA.527.41	>23_GTT_GTRAY.441.41	>24_GTG_HLIQY.171.41	>25_GTA_YTRQV.378.41	>26_GGT_ALKNM.371.41	>27_GGT_LTKDQ.1064.41	>28_GGG_RSKER.1396.41	>29_GGC_TLKNQ.884.41	>30_GGA_LAKDQ.691.41	>31_GCT_KITKF.302.41	>32_GCC_VRLKY.219.41	>33_GCA_ALRQQ.206.41	>34_GAT_RTMRY.313.41	>35_GAG_VMRWY.217.41	>36_GAC_ATRRF.352.41	>37_GAA_RFQKF.262.41	>38_CTA_LHYAK.525.41	>39_CTA_IFNAK.612.41	>40_CGG_STRER.200.41	>41_CGC_RVMSR.261.41	>42_CGA_TFYAA.292.41	>43_CCT_MTNGK.489.41	>44_CCT_RGDSK.696.41	>45_CCG_RCYEK.644.41	>46_CCC_RLDSK.416.41	>47_CCA_KMTQK.1156.41	>48_CCA_EHNAK.1119.41	>49_CAT_LSQSR.485.41	>51_CAG_MSHWR.453.41	>52_CAC_LGMRR.575.41
	NNCTCATTAGAGNN	NNCAAATTAATTNN	NNGCATTAGCGNN	NNCCGTTAATTANN	NNCTCATTAGGGNN	NNGCGTTAATTANN	NNGACGTTAATGNN	NNGCCCATTATGNN	NNCCCATTAAGANN	NNACTCATTAAGNN	NNTTAATTAGCGNN	NNGCGGATTATCNN	NNCCCATTAGTCNN	NNTTGCTAATCCNN	NNATGCGTATGGNN	NNCCAATTAACGNN	NNCTAATTAACANN	NNCGCATTAACGNN	NNTGTATTAATANN	NNCTAATTACAANN	NNTGGTTAAGTANN	NNTCCACTTAAGNN	NNCCTACTTAATNN	NNCCACCTTAAANN	NNTTCCTTAACNN	NNCCCCTCAATGNN	NNCGCCTTTAGGNN	NNCTCCTTAATNN	NNCTTCTTAGCANN	NNTGACTAAGCCNN	NNGCTTTAAGTANN	NNCGTCTTAGCTNN	NNCCTCTCAACNN	NNCGTCTCAATANN	NNGGTTCTTAGCNN	NNGCTGGTTAAGNN	NNCTAGTTAAGANN	NNCCCCGTTAACNN	NNGCGTTAGCGNN	NNACTCGTTACANN	NNATTAGTTAAGNN	NNTCGGGTTACANN	NNCCGGTTAGAGNN	NNGCCTAACCCGNN	NNCCTAGTTAAANN	NNGCTAGTTACANN	NNCGTGTTAATGNN	NNCCTGTTTAGGNN	NNGTGTGTTTAGNN
	>1_TTT_RTVAA.241.42	>2_TTT_RTVSA.262.42	>4_TTC_VRVSA.229.42	>5_TTC_TRVAA.387.42	>6_TTA_VRVAA.771.42	>7_TTA_RVLRA.512.42	>8_TGT_RVVSQ.404.42	>9_TGG_KTTQD.647.42	>10_TGG_KSVMQ.378.42	>11_TGA_KSVAQ.695.42	>12_TGA_RGVAA.524.42	>13_TCT_ATVKA.633.42	>14_TCG_KGTQM.359.42	>15_TCC_RMIKS.285.42	>17_TAT_TRVSA.247.42	>18_TAG_RLTQA.399.42	>19_TAG_RMVSA.209.42	>20_TAC_QRVSA.386.42	>21_TAC_ERVSV.477.42	>22_TAA_RITAA.519.42	>23_GTT_GTRAY.436.42	>24_GTG_HLIQY.168.42	>25_GTA_YTRQV.375.42	>26_GGT_ALKNM.357.42	>27_GGT_LTKDQ.1039.42	>28_GGG_RSKER.1379.42	>29_GGC_TLKNQ.851.42	>30_GGA_LAKDQ.688.42	>31_GCT_KITKF.301.42	>32_GCC_VRLKY.214.42	>33_GCA_ALRQQ.199.42	>34_GAT_RTMRY.310.42	>35_GAG_VMRWY.215.42	>36_GAC_ATRRF.351.42	>37_GAA_RFQKF.254.42	>38_CTA_LHYAK.493.42	>39_CTA_IFNAK.612.42	>40_CGG_STRER.198.42	>41_CGC_RVMSR.260.42	>42_CGA_TFYAA.289.42	>43_CCT_MTNGK.481.42	>44_CCT_RGDSK.695.42	>45_CCG_RCYEK.641.42	>46_CCC_RLDSK.406.42	>47_CCA_KMTQK.1155.42	>48_CCA_EHNAK.1098.42	>49_CAT_LSQSR.476.42	>51_CAG_MSHWR.452.42	>52_CAC_LGMRR.557.42
	NNCTCATTATTANN	NNCTCGTTAATANN	NNTTATGAAATANN	NNCGCTGAATTANN	NNCTAATTATANN	NNGAGCTAATTANN	NNTGACTTAATGNN	NNGCCCATTAATNN	NNCCCATTAGGGNN	NNACTCATTAACNN	NNCTCATTAGGGNN	NNCGGATTATTANN	NNCCAATTAGAGNN	NNGCGGATTAGANN	NNACGTATTGGTNN	NNCCAATTAATTNN	NNCAAATTAATTNN	NNGGCACTAATANN	NNCGTATTATAGNN	NNCTCATTATTANN	NNTACTTAAGTANN	NNACCACTTAACNN	NNATGTTAAGTANN	NNGAACCTACTTNN	NNTTCCTTAGGANN	NNCCCCTTAGGANN	NNCGCCTTATAANN	NNCTCCTTAAGNN	NNCGTCTTAAAANN	NNGATCTAAGCCNN	NNATGCTAAGTANN	NNGTACTTAAGANN	NNCCCTCTCAATNN	NNCGTCTTATGTNN	NNGCTTCTTAGCNN	NNCTAGTTAAGNN	NNTCTAGTTAAGNN	NNTCCGTTAATTNN	NNCCATGTTAAANN	NNACTCGTTAGGNN	NNCCTGGTTATGNN	NNAGGGTTAAGANN	NNCTGGTTAACCNN	NNTCGGGTTATGNN	NNCTAGTTAAGTNN	NNTCTGGTTAAANN	NNAGAGTTAACANN	NNCCTGTTATTANN	NNTCGTGTTAATNN
	>1_TTT_RTVAA.239.43	>2_TTT_RTVSA.258.43	>4_TTC_VRVSA.228.43	>5_TTC_TRVAA.384.43	>6_TTA_VRVAA.762.43	>7_TTA_RVLRA.511.43	>8_TGT_RVVSQ.403.43	>9_TGG_KTTQD.628.43	>10_TGG_KSVMQ.370.43	>11_TGA_KSVAQ.693.43	>12_TGA_RGVAA.519.43	>13_TCT_ATVKA.633.43	>14_TCG_KGTQM.356.43	>15_TCC_RMIKS.285.43	>17_TAT_TRVSA.246.43	>18_TAG_RLTQA.389.43	>19_TAG_RMVSA.208.43	>20_TAC_QRVSA.379.43	>21_TAC_ERVSV.474.43	>22_TAA_RITAA.502.43	>23_GTT_GTRAY.434.43	>24_GTG_HLIQY.168.43	>25_GTA_YTRQV.370.43	>26_GGT_ALKNM.347.43	>27_GGT_LTKDQ.1037.43	>28_GGG_RSKER.1344.43	>29_GGC_TLKNQ.849.43	>30_GGA_LAKDQ.677.43	>31_GCT_KITKF.292.43	>32_GCC_VRLKY.212.43	>33_GCA_ALRQQ.197.43	>34_GAT_RTMRY.267.43	>35_GAG_VMRWY.214.43	>36_GAC_ATRRF.335.43	>37_GAA_RFQKF.250.43	>38_CTA_LHYAK.460.43	>39_CTA_IFNAK.608.43	>40_CGG_STRER.194.43	>41_CGC_RVMSR.256.43	>42_CGA_TFYAA.289.43	>43_CCT_MTNGK.465.43	>44_CCT_RGDSK.687.43	>45_CCG_RCYEK.636.43	>46_CCC_RLDSK.401.43	>47_CCA_KMTQK.1147.43	>48_CCA_EHNAK.1096.43	>49_CAT_LSQSR.470.43	>51_CAG_MSHWR.449.43	>52_CAC_LGMRR.552.43
	NNGTTAATTAACNN	NNCATATTAACANN	NNTGTATTAATANN	NNGTTTTAATTANN	NNCTAATTACGNN	NNTGTCTAATTANN	NNCGCATTAATTNN	NNACCCATTAGCNN	NNCCCATTAGAANN	NNCCTCATTAAANN	NNCTAATTAGACNN	NNTACTTAATCCNN	NNCCAATTAAGGNN	NNAGGATTAAAGNN	NNTGCATTAATANN	NNCCAATTAAGGNN	NNATTAATTAGTNN	NNCTCATTAATANN	NNCGTATTACTTNN	NNCTAATTACANN	NNCACCTAAGTANN	NNCCACTAAGTGNN	NNCCTACTTACGNN	NNCGCCTTAAGNN	NNACTCCTTAAGNN	NNCTCCCTCAACNN	NNCGCCTTACGANN	NNCTTCCTTAGTNN	NNCGGCTTAATTNN	NNCGGCTTATGANN	NNGATCTAAGTANN	NNATTCTTAAGANN	NNCCTCTCAACCNN	NNGTCCAGATTGNN	NNACTACTTAAANN	NNCCTAGTTAGCANN	NNTCTCGTTAACNN	NNTCCCGTTAATNN	NNCACGTTAGTGNN	NNGCTCGTTTAANN	NNGTAGGTTAGTNN	NNTTTCAAGTCANN	NNTCCGGTTAGTNN	NNCGGGTTAGGANN	NNAGTTAACTANN	NNGCTGGTTAGCNN	NNATTGTTAACANN	NNCCTGTTAACANN	NNGCGTGTTATANN
	>1_TTT_RTVAA.234.44	>2_TTT_RTVSA.249.44	>4_TTC_VRVSA.228.44	>5_TTC_TRVAA.383.44	>6_TTA_VRVAA.728.44	>7_TTA_RVLRA.509.44	>8_TGT_RVVSQ.396.44	>9_TGG_KTTQD.625.44	>10_TGG_KSVMQ.364.44	>11_TGA_KSVAQ.692.44	>12_TGA_RGVAA.518.44	>13_TCT_ATVKA.627.44	>14_TCG_KGTQM.353.44	>15_TCC_RMIKS.285.44	>17_TAT_TRVSA.242.44	>18_TAG_RLTQA.363.44	>19_TAG_RMVSA.205.44	>20_TAC_QRVSA.378.44	>21_TAC_ERVSV.470.44	>22_TAA_RITAA.501.44	>23_GTT_GTRAY.427.44	>24_GTG_HLIQY.166.44	>25_GTA_YTRQV.369.44	>26_GGT_ALKNM.346.44	>27_GGT_LTKDQ.1006.44	>28_GGG_RSKER.1318.44	>29_GGC_TLKNQ.836.44	>30_GGA_LAKDQ.664.44	>31_GCT_KITKF.289.44	>32_GCC_VRLKY.208.44	>33_GCA_ALRQQ.190.44	>34_GAT_RTMRY.265.44	>35_GAG_VMRWY.210.44	>36_GAC_ATRRF.334.44	>37_GAA_RFQKF.247.44	>38_CTA_LHYAK.440.44	>39_CTA_IFNAK.583.44	>40_CGG_STRER.192.44	>41_CGC_RVMSR.251.44	>42_CGA_TFYAA.268.44	>43_CCT_MTNGK.465.44	>44_CCT_RGDSK.657.44	>45_CCG_RCYEK.634.44	>46_CCC_RLDSK.390.44	>47_CCA_KMTQK.1141.44	>48_CCA_EHNAK.1048.44	>49_CAT_LSQSR.456.44	>51_CAG_MSHWR.444.44	>52_CAC_LGMRR.546.44
	NNCTAATTAACGNN	NNCTTATTAATANN	NNAGGGTTAAGANN	NNCTAATTATTANN	NNCTCATTAATANN	NNCTAATTAACCNN	NNTTGCCTAATGNN	NNACCCATTACANN	NNCGCATTAACANN	NNCTCATTACGANN	NNCTAATTACGANN	NNAGGATTAGAGNN	NNTCCATTAACANN	NNGGGATTAGAGNN	NNCGAATTAGTANN	NNTCAATTAATANN	NNCACATTATGANN	NNTCCTGACAGTNN	NNCGTATTACAGNN	NNTAATTAACANN	NNGCTCTAAGTANN	NNGCCACTTAATNN	NNCTACTTAAGTNN	NNGCGCCTCAAANN	NNCTCCTTAGAGNN	NNTCCCTTAAAANN	NNCGCCTTAATNN	NNTTCCTAAGGANN	NNCGTCTCACGANN	NNTCTCTAAGCCNN	NNACGCTAAGTANN	NNCGTCTTAAGNN	NNCCTCTCAAGGNN	NNCGTCTCAAACNN	NNAGTTCTTAACNN	NNCTAGTTAACANN	NNCTAGTTAGTANN	NNTTCCGTTAAANN	NNTCCGTTAACANN	NNCCTCGTTAATNN	NNCTGGTTAACGNN	NNTCAATCCATGNN	NNTCACGCCGAGNN	NNGCGGGTTTAANN	NNGTGTTAACCANN	NNGCTAGTTAGANN	NNCATCTTAACANN	NNCCTGTTATGGNN	NNGTGTGTTACANN
	>1_TTT_RTVAA.231.45	>2_TTT_RTVSA.248.45	>4_TTC_VRVSA.208.45	>5_TTC_TRVAA.366.45	>6_TTA_VRVAA.711.45	>7_TTA_RVLRA.489.45	>8_TGT_RVVSQ.388.45	>9_TGG_KTTQD.610.45	>10_TGG_KSVMQ.351.45	>11_TGA_KSVAQ.668.45	>12_TGA_RGVAA.514.45	>13_TCT_ATVKA.627.45	>14_TCG_KGTQM.350.45	>15_TCC_RMIKS.278.45	>17_TAT_TRVSA.241.45	>18_TAG_RLTQA.361.45	>19_TAG_RMVSA.204.45	>20_TAC_QRVSA.374.45	>21_TAC_ERVSV.437.45	>22_TAA_RITAA.500.45	>23_GTT_GTRAY.424.45	>24_GTG_HLIQY.166.45	>25_GTA_YTRQV.367.45	>26_GGT_ALKNM.341.45	>27_GGT_LTKDQ.1004.45	>28_GGG_RSKER.1263.45	>29_GGC_TLKNQ.829.45	>30_GGA_LAKDQ.641.45	>31_GCT_KITKF.288.45	>32_GCC_VRLKY.196.45	>33_GCA_ALRQQ.190.45	>34_GAT_RTMRY.260.45	>35_GAG_VMRWY.208.45	>36_GAC_ATRRF.334.45	>37_GAA_RFQKF.245.45	>38_CTA_LHYAK.416.45	>39_CTA_IFNAK.567.45	>40_CGG_STRER.187.45	>41_CGC_RVMSR.248.45	>42_CGA_TFYAA.268.45	>43_CCT_MTNGK.460.45	>44_CCT_RGDSK.631.45	>45_CCG_RCYEK.628.45	>46_CCC_RLDSK.376.45	>47_CCA_KMTQK.1127.45	>48_CCA_EHNAK.1020.45	>49_CAT_LSQSR.451.45	>51_CAG_MSHWR.443.45	>52_CAC_LGMRR.535.45
	NNCTCATTATCANN	NNCCAATTAATANN	NNCTCATTAATGNN	NNGCACTAATTANN	NNCTAATTAATTNN	NNCTAATTAAGGNN	NNACTCTTAATGNN	NNGCCCATTTAGNN	NNTGCATTAATGNN	NNTCATTAGTANN	NNCTCATTAGAGNN	NNGCGGATTACANN	NNGCTAATTAATNN	NNCGGATTAATANN	NNGCGTATTAGCNN	NNTCCAATTAACNN	NNGTTAATTAAANN	NNCGTATTAGTTNN	NNCCGTGTTAGTNN	NNCTAATTAGATNN	NNCTACTTACGNN	NNTTACTAAGTGNN	NNCATTTAAGTANN	NNCGCCGTTACTNN	NNCTCCTTAGTTNN	NNCCCCTTAGAGNN	NNGCACCTTAAANN	NNTTCCTTAACANN	NNCGTCTTAAGANN	NNTCCCTAAGCCNN	NNAGCCTAAGTANN	NNTTTCTTAAGANN	NNGCCTCTCCAANN	NNCGTCTCAGCCNN	NNTCCTGACAGTNN	NNCCTAGTTAGTGNN	NNCCTCGTTAATNN	NNTCCCGTTAGANN	NNTCGTGTTAATNN	NNCTCGTTAAGANN	NNGTTCGTTAAANN	NNCGGGTTAGGANN	NNTTGGTTAGTANN	NNACGGGTTATANN	NNACTAGTTAACNN	NNACTGGTTAATNN	NNTCTGTTAACANN	NNCCTGTTATCTNN	NNTGTGTTAACGNN
	>1_TTT_RTVAA.221.46	>2_TTT_RTVSA.245.46	>4_TTC_VRVSA.202.46	>5_TTC_TRVAA.353.46	>6_TTA_VRVAA.667.46	>7_TTA_RVLRA.486.46	>8_TGT_RVVSQ.365.46	>9_TGG_KTTQD.591.46	>10_TGG_KSVMQ.343.46	>11_TGA_KSVAQ.617.46	>12_TGA_RGVAA.491.46	>13_TCT_ATVKA.625.46	>14_TCG_KGTQM.347.46	>15_TCC_RMIKS.276.46	>17_TAT_TRVSA.233.46	>18_TAG_RLTQA.352.46	>19_TAG_RMVSA.203.46	>20_TAC_QRVSA.372.46	>21_TAC_ERVSV.436.46	>22_TAA_RITAA.497.46	>23_GTT_GTRAY.404.46	>24_GTG_HLIQY.165.46	>25_GTA_YTRQV.365.46	>26_GGT_ALKNM.331.46	>27_GGT_LTKDQ.1002.46	>28_GGG_RSKER.1263.46	>29_GGC_TLKNQ.811.46	>30_GGA_LAKDQ.641.46	>31_GCT_KITKF.285.46	>32_GCC_VRLKY.195.46	>33_GCA_ALRQQ.189.46	>34_GAT_RTMRY.232.46	>35_GAG_VMRWY.207.46	>36_GAC_ATRRF.332.46	>37_GAA_RFQKF.240.46	>38_CTA_LHYAK.411.46	>39_CTA_IFNAK.559.46	>40_CGG_STRER.186.46	>41_CGC_RVMSR.244.46	>42_CGA_TFYAA.264.46	>43_CCT_MTNGK.458.46	>44_CCT_RGDSK.542.46	>45_CCG_RCYEK.623.46	>46_CCC_RLDSK.342.46	>47_CCA_KMTQK.1114.46	>48_CCA_EHNAK.1017.46	>49_CAT_LSQSR.451.46	>51_CAG_MSHWR.435.46	>52_CAC_LGMRR.531.46
	NNGTGTTAATTANN	NNCATATTAAGANN	NNCGCATTATTANN	NNTGTTTAATTANN	NNCTCATTAAANN	NNTTGGGTACAANN	NNCGTGTTAATGNN	NNCCCATTAACNN	NNGTCCATTAAGNN	NNTTCATTAAGGNN	NNTTAATTACGCNN	NNGGGGATTAAGNN	NNCCAATTAACGNN	NNCGGATTAGTANN	NNGCGTATTAAGNN	NNCCAATTATCNN	NNCATATTAGTGNN	NNCGTATTATAGNN	NNCGCATTAACCNN	NNTAATTATGANN	NNCTACTTATCNN	NNCCACTTATTANN	NNGGTTTAAGTANN	NNGCACCTTAGTNN	NNCTCCTTAGCCNN	NNCCCCTCAAGNN	NNCGCCTTAATCNN	NNCCTCCTTAAGNN	NNCAGCTTAGCANN	NNCGACTAAGCCNN	NNCTCGTAAGTANN	NNCTACTTAGGANN	NNTCCTCTTAAANN	NNCGTCTTAGTTNN	NNGATGCTAAACNN	NNCTAGTTAACNN	NNGGTAGTTAATNN	NNGGTAAAGCATNN	NNACTGCAAAAGNN	NNCCTCGTTATANN	NNGCAGGTTAATNN	NNCCGAGTAAGANN	NNATTGGTTAGTNN	NNACGGGTTAGANN	NNGATGGTTAACNN	NNTCTGGTTAGANN	NNTATCTTAACANN	NNTGTTCACATANN	NNCGTGTCAAAANN
	>1_TTT_RTVAA.217.47	>2_TTT_RTVSA.240.47	>4_TTC_VRVSA.200.47	>5_TTC_TRVAA.351.47	>6_TTA_VRVAA.667.47	>7_TTA_RVLRA.483.47	>8_TGT_RVVSQ.359.47	>9_TGG_KTTQD.578.47	>10_TGG_KSVMQ.339.47	>11_TGA_KSVAQ.613.47	>12_TGA_RGVAA.481.47	>13_TCT_ATVKA.622.47	>14_TCG_KGTQM.328.47	>15_TCC_RMIKS.274.47	>17_TAT_TRVSA.232.47	>18_TAG_RLTQA.351.47	>19_TAG_RMVSA.201.47	>20_TAC_QRVSA.342.47	>21_TAC_ERVSV.435.47	>22_TAA_RITAA.483.47	>23_GTT_GTRAY.399.47	>24_GTG_HLIQY.156.47	>25_GTA_YTRQV.343.47	>26_GGT_ALKNM.326.47	>27_GGT_LTKDQ.985.47	>28_GGG_RSKER.1263.47	>29_GGC_TLKNQ.803.47	>30_GGA_LAKDQ.640.47	>31_GCT_KITKF.282.47	>32_GCC_VRLKY.193.47	>33_GCA_ALRQQ.184.47	>34_GAT_RTMRY.232.47	>35_GAG_VMRWY.204.47	>36_GAC_ATRRF.317.47	>37_GAA_RFQKF.235.47	>38_CTA_LHYAK.395.47	>39_CTA_IFNAK.555.47	>40_CGG_STRER.183.47	>41_CGC_RVMSR.243.47	>42_CGA_TFYAA.260.47	>43_CCT_MTNGK.457.47	>44_CCT_RGDSK.542.47	>45_CCG_RCYEK.604.47	>46_CCC_RLDSK.339.47	>47_CCA_KMTQK.1113.47	>48_CCA_EHNAK.1001.47	>49_CAT_LSQSR.449.47	>51_CAG_MSHWR.435.47	>52_CAC_LGMRR.516.47
	NNGTTAATTAAANN	NNCTCACTAATANN	NNTGCATTAGTGNN	NNCGCTTAATTANN	NNCTAATTATCNN	NNATTTTAATTANN	NNGCACATTAAGNN	NNCCCATTAGTGNN	NNTCCTGACAGTNN	NNTCTCATTAAANN	NNGTGTTAATTANN	NNAGGATTAATCNN	NNCCATTAGTGNN	NNGGGGATTAGCNN	NNGCGCATTAATNN	NNCCAATTAGCCNN	NNCGCATTAGGANN	NNCGTATTACAANN	NNCGCATTACGGNN	NNTCATTAGTGNN	NNCACGTAAGTANN	NNCCACTTAGAGNN	NNTGCGCATCGANN	NNTCGCCTTAAANN	NNTCTCCTTAATNN	NNTCCCTAAGGGNN	NNGCGCCTTAACANN	NNCCTCCTTATGNN	NNCGTCTTATGANN	NNAGTTTAAGCCNN	NNGACTTAAGTANN	NNCCGAGTAAGANN	NNCCTCTTCAATNN	NNCGTCTTACATNN	NNGCTACTTAATNN	NNACTAGTTAAANN	NNCCTAGTTAACNN	NNTCCGTTAGGGNN	NNCGTGTTAATCNN	NNCTCGTTAGANN	NNATTGGTTAGTNN	NNGATGCTAAACNN	NNTCGGTTAATTNN	NNCGGGTTAATGNN	NNGCTGGTTAATNN	NNCTAGTTAAATNN	NNAGACTTAACANN	NNCCTGTTAGTANN	NNGTGTGTTACCNN
	>1_TTT_RTVAA.209.48	>2_TTT_RTVSA.237.48	>4_TTC_VRVSA.199.48	>5_TTC_TRVAA.347.48	>6_TTA_VRVAA.646.48	>7_TTA_RVLRA.481.48	>8_TGT_RVVSQ.359.48	>9_TGG_KTTQD.577.48	>10_TGG_KSVMQ.339.48	>11_TGA_KSVAQ.605.48	>12_TGA_RGVAA.468.48	>13_TCT_ATVKA.621.48	>14_TCG_KGTQM.324.48	>15_TCC_RMIKS.274.48	>17_TAT_TRVSA.232.48	>18_TAG_RLTQA.349.48	>19_TAG_RMVSA.198.48	>20_TAC_QRVSA.327.48	>21_TAC_ERVSV.428.48	>22_TAA_RITAA.468.48	>23_GTT_GTRAY.392.48	>24_GTG_HLIQY.153.48	>25_GTA_YTRQV.342.48	>26_GGT_ALKNM.312.48	>27_GGT_LTKDQ.953.48	>28_GGG_RSKER.1218.48	>29_GGC_TLKNQ.800.48	>30_GGA_LAKDQ.626.48	>31_GCT_KITKF.276.48	>32_GCC_VRLKY.190.48	>33_GCA_ALRQQ.182.48	>34_GAT_RTMRY.231.48	>35_GAG_VMRWY.201.48	>36_GAC_ATRRF.290.48	>37_GAA_RFQKF.224.48	>38_CTA_LHYAK.394.48	>39_CTA_IFNAK.554.48	>40_CGG_STRER.181.48	>41_CGC_RVMSR.240.48	>42_CGA_TFYAA.240.48	>43_CCT_MTNGK.451.48	>44_CCT_RGDSK.541.48	>45_CCG_RCYEK.600.48	>46_CCC_RLDSK.320.48	>47_CCA_KMTQK.1109.48	>48_CCA_EHNAK.980.48	>49_CAT_LSQSR.449.48	>51_CAG_MSHWR.428.48	>52_CAC_LGMRR.515.48
	NNTCACTAATTANN	NNAGGGTTAAGANN	NNCGCATTAGGANN	NNTCGCTAATTANN	NNCTAATTACTTNN	NNGCTTTAATTANN	NNTCCGCTAATGNN	NNTCCATTAATTNN	NNCTCATTAAAGNN	NNACTCATTAAANN	NNTTATTAATTANN	NNGGATTAGTTNN	NNGTCCATTAAGNN	NNAGCTTAATCCNN	NNCACATTAATANN	NNCTCATTAATGNN	NNCGTGTTAATGNN	NNCGTATTACGTNN	NNGCATTAGCANN	NNCTTGTTAATGNN	NNGTCGTAAGTANN	NNCTCTTAAGTGNN	NNACGCTAAGTANN	NNGCGCCTCAAGNN	NNTCTCCTTAAANN	NNCCCCTTAGGTNN	NNCGCCTTACTANN	NNTTCCTTAGCGNN	NNGTCTTAGCANN	NNCGTCTTAATGNN	NNTATTTAAGTANN	NNCGTCTTAGCGNN	NNCCTCTTAGCCNN	NNGCGTCTTACCNN	NNGCTTCTTATTNN	NNGGTGGTTAACNN	NNGCTAGTTATCNN	NNGTCCGTTATCNN	NNGCGTGTTACANN	NNTCTCGTTAGANN	NNGTTAGTTAAANN	NNTCGGGTTATGNN	NNCGGTTAAGANN	NNACGGGTTACANN	NNTTGCTAACCANN	NNGCTGGTTATTNN	NNGACCTTAACANN	NNCTGTCAGTANN	NNCTGTGTTAAANN
	>1_TTT_RTVAA.205.49	>2_TTT_RTVSA.236.49	>4_TTC_VRVSA.199.49	>5_TTC_TRVAA.345.49	>6_TTA_VRVAA.610.49	>7_TTA_RVLRA.481.49	>8_TGT_RVVSQ.355.49	>9_TGG_KTTQD.569.49	>10_TGG_KSVMQ.335.49	>11_TGA_KSVAQ.592.49	>12_TGA_RGVAA.462.49	>13_TCT_ATVKA.588.49	>14_TCG_KGTQM.323.49	>15_TCC_RMIKS.265.49	>17_TAT_TRVSA.229.49	>18_TAG_RLTQA.347.49	>19_TAG_RMVSA.195.49	>20_TAC_QRVSA.311.49	>21_TAC_ERVSV.427.49	>22_TAA_RITAA.449.49	>23_GTT_GTRAY.386.49	>24_GTG_HLIQY.152.49	>25_GTA_YTRQV.342.49	>26_GGT_ALKNM.303.49	>27_GGT_LTKDQ.950.49	>28_GGG_RSKER.1202.49	>29_GGC_TLKNQ.765.49	>30_GGA_LAKDQ.595.49	>31_GCT_KITKF.275.49	>32_GCC_VRLKY.185.49	>33_GCA_ALRQQ.182.49	>34_GAT_RTMRY.217.49	>35_GAG_VMRWY.197.49	>36_GAC_ATRRF.288.49	>37_GAA_RFQKF.203.49	>38_CTA_LHYAK.393.49	>39_CTA_IFNAK.513.49	>40_CGG_STRER.174.49	>41_CGC_RVMSR.235.49	>42_CGA_TFYAA.230.49	>43_CCT_MTNGK.441.49	>44_CCT_RGDSK.504.49	>45_CCG_RCYEK.595.49	>46_CCC_RLDSK.314.49	>47_CCA_KMTQK.1081.49	>48_CCA_EHNAK.940.49	>49_CAT_LSQSR.447.49	>51_CAG_MSHWR.427.49	>52_CAC_LGMRR.496.49
	NNTTAATTAAGANN	NNTTATGAAATANN	NNGCGTATTATGNN	NNGCGTTAATTANN	NNCTCATTATTANN	NNAGCCTAATTANN	NNACTCCTAATGNN	NNACTGCAAAAGNN	NNCACATTAGCANN	NNTTCATTATCANN	NNTAGTTAATTANN	NNGGATTAACGNN	NNCCCATTAACNN	NNGGATTAGTTNN	NNGCGTATTATGNN	NNTCAATTAAGANN	NNCCCATTAATANN	NNCGCATTAAGTNN	NNGCGTATTACGNN	NNCTAATTAAGNN	NNCTACTTAATNN	NNCCACTTAGTGNN	NNGTATTAAGTANN	NNCACCTTAAGANN	NNCTCCTTATGNN	NNAATTTAAGGGNN	NNTCGCCTTAATNN	NNCTCTTAAGGANN	NNCGGCTTAACCNN	NNACCCTAAGCCNN	NNATCCTAAGTANN	NNGATCTTAAGANN	NNCCTCTTAGTGNN	NNCGTCTTAATTNN	NNCTTCTTAAAGNN	NNGATGGTTAAGNN	NNACTAGTTATTNN	NNTCCGTTAGCGNN	NNGACCTTAACANN	NNACTCGTTAAANN	NNGAAGGTTAAANN	NNGAGTCAGCGANN	NNCTGGTTATAGNN	NNCGGGTTAGAANN	NNGTTTTAACCANN	NNTCTGGTTAATNN	NNGCTGCTAACANN	NNCCCTGTTAAGNN	NNCGTGTTAACTNN
	>1_TTT_RTVAA.205.50	>2_TTT_RTVSA.235.50	>4_TTC_VRVSA.194.50	>5_TTC_TRVAA.335.50	>6_TTA_VRVAA.608.50	>7_TTA_RVLRA.466.50	>8_TGT_RVVSQ.352.50	>9_TGG_KTTQD.549.50	>10_TGG_KSVMQ.332.50	>11_TGA_KSVAQ.582.50	>12_TGA_RGVAA.460.50	>13_TCT_ATVKA.586.50	>14_TCG_KGTQM.311.50	>15_TCC_RMIKS.265.50	>17_TAT_TRVSA.216.50	>18_TAG_RLTQA.347.50	>19_TAG_RMVSA.193.50	>20_TAC_QRVSA.301.50	>21_TAC_ERVSV.427.50	>22_TAA_RITAA.435.50	>23_GTT_GTRAY.378.50	>24_GTG_HLIQY.148.50	>25_GTA_YTRQV.340.50	>26_GGT_ALKNM.302.50	>27_GGT_LTKDQ.927.50	>28_GGG_RSKER.1200.50	>29_GGC_TLKNQ.757.50	>30_GGA_LAKDQ.586.50	>31_GCT_KITKF.273.50	>32_GCC_VRLKY.184.50	>33_GCA_ALRQQ.181.50	>34_GAT_RTMRY.214.50	>35_GAG_VMRWY.186.50	>36_GAC_ATRRF.277.50	>37_GAA_RFQKF.202.50	>38_CTA_LHYAK.371.50	>39_CTA_IFNAK.512.50	>40_CGG_STRER.164.50	>41_CGC_RVMSR.225.50	>42_CGA_TFYAA.227.50	>43_CCT_MTNGK.440.50	>44_CCT_RGDSK.476.50	>45_CCG_RCYEK.578.50	>46_CCC_RLDSK.299.50	>47_CCA_KMTQK.1073.50	>48_CCA_EHNAK.909.50	>49_CAT_LSQSR.445.50	>51_CAG_MSHWR.421.50	>52_CAC_LGMRR.489.50
	NNTCATTAGTANN	NNGGCACTAATANN	NNCATATTAATANN	NNCTCATTATTANN	NNCTAATCAGGANN	NNACATTAATTANN	NNTCCCTTAATGNN	NNTCCCATTAGANN	NNATCAATTAAGNN	NNTTCATTAATGNN	NNTTAATTAGTANN	NNACGGATTAAANN	NNCCCATTAATTNN	NNATCAGTCCTTNN	NNCTAATTAGCANN	NNTCTATTTCAANN	NNGCGCATTAACNN	NNCGTATTATTANN	NNCGCATTAGGANN	NNCTAATTAACNN	NNGTATTAAGTANN	NNTGCTTAAGTGNN	NNGATCTAAGTANN	NNGCCTTAATANN	NNTTCTTAAGGANN	NNCCCCTCAAGANN	NNCGCCTTATTANN	NNTCACTAAGGANN	NNGGCTTAAGCNN	NNGTATTAAGCCNN	NNCTACTTAACGNN	NNCTACTTAACANN	NNACCTCTTACANN	NNCGTCTCACGANN	NNCTTCTTAGGGNN	NNCTAGTTAAAGNN	NNGGTAGTTATANN	NNTTCCGTTAACNN	NNAGTGTTAACANN	NNCTCGTTAAGNN	NNAATGGTTAAGNN	NNACGGGTTATANN	NNATTGGTTAAGNN	NNGTTACTACCANN	NNGGCTTAACTANN	NNGGTGGTTAAANN	NNTGTCTTAACANN	NNCCTGTTAAACNN	NNGTGTGTTATANN
	>1_TTT_RTVAA.205.51	>2_TTT_RTVSA.234.51	>4_TTC_VRVSA.193.51	>5_TTC_TRVAA.324.51	>6_TTA_VRVAA.608.51	>7_TTA_RVLRA.458.51	>8_TGT_RVVSQ.351.51	>9_TGG_KTTQD.545.51	>10_TGG_KSVMQ.331.51	>11_TGA_KSVAQ.580.51	>12_TGA_RGVAA.453.51	>13_TCT_ATVKA.582.51	>14_TCG_KGTQM.268.51	>15_TCC_RMIKS.262.51	>17_TAT_TRVSA.210.51	>18_TAG_RLTQA.339.51	>19_TAG_RMVSA.192.51	>20_TAC_QRVSA.278.51	>21_TAC_ERVSV.424.51	>22_TAA_RITAA.431.51	>23_GTT_GTRAY.376.51	>24_GTG_HLIQY.146.51	>25_GTA_YTRQV.340.51	>26_GGT_ALKNM.302.51	>27_GGT_LTKDQ.910.51	>28_GGG_RSKER.1166.51	>29_GGC_TLKNQ.718.51	>30_GGA_LAKDQ.582.51	>31_GCT_KITKF.268.51	>32_GCC_VRLKY.182.51	>33_GCA_ALRQQ.171.51	>34_GAT_RTMRY.212.51	>35_GAG_VMRWY.185.51	>36_GAC_ATRRF.276.51	>37_GAA_RFQKF.200.51	>38_CTA_LHYAK.364.51	>39_CTA_IFNAK.487.51	>40_CGG_STRER.162.51	>41_CGC_RVMSR.222.51	>42_CGA_TFYAA.222.51	>43_CCT_MTNGK.433.51	>44_CCT_RGDSK.463.51	>45_CCG_RCYEK.562.51	>46_CCC_RLDSK.292.51	>47_CCA_KMTQK.1057.51	>48_CCA_EHNAK.898.51	>49_CAT_LSQSR.445.51	>51_CAG_MSHWR.404.51	>52_CAC_LGMRR.469.51
	NNTAATTAATTNN	NNCAAATTAATANN	NNTTAATTAATANN	NNTAACTAATTANN	NNCTAATTATTTNN	NNCTAATTATTANN	NNTTTGTTAATGNN	NNCCCATTAATTNN	NNTGCATTAAGANN	NNTTCATTAGGGNN	NNCTCATTAGACNN	NNCGGATTATATNN	NNTCCATTAGTANN	NNCGGATTAATTNN	NNCGTATTAGTCNN	NNCCAATTATGGNN	NNTTTGCTAATGNN	NNGCGTATTAATNN	NNGCGTATTAAGNN	NNCTCATTAATTNN	NNGTCCTAAGTANN	NNTGTGTAAGTGNN	NNTCTCTAAGTANN	NNCCGCCTTAAANN	NNGGTCCTTAGGNN	NNTTGGGTACAANN	NNGCACCTTAATNN	NNCCTCCTTATANN	NNCTTCTTAATANN	NNAGCCTAAGCCNN	NNTAGTTAAGTANN	NNCGTCTAAACNN	NNCCTCTTAGGCNN	NNCGTCTCAATCNN	NNACTTCTTAACNN	NNCCTAGTTATGNN	NNACTAGTTAGTNN	NNCCGTTTCAANN	NNGCTGCTAACANN	NNGCTCGTTTAGNN	NNCTGGTTAAANN	NNGCAGGTTAAGNN	NNAGCAGAATCGNN	NNCGGGTTAGAGNN	NNGCGCTAACCANN	NNGCTAGTTAAGNN	NNGACGTTAACANN	NNTCCTGTTAATNN	NNCTGTGTTAATNN
	>1_TTT_RTVAA.204.52	>2_TTT_RTVSA.234.52	>4_TTC_VRVSA.192.52	>5_TTC_TRVAA.309.52	>6_TTA_VRVAA.595.52	>7_TTA_RVLRA.454.52	>8_TGT_RVVSQ.350.52	>9_TGG_KTTQD.528.52	>10_TGG_KSVMQ.331.52	>11_TGA_KSVAQ.555.52	>12_TGA_RGVAA.453.52	>13_TCT_ATVKA.554.52	>14_TCG_KGTQM.258.52	>15_TCC_RMIKS.261.52	>17_TAT_TRVSA.210.52	>18_TAG_RLTQA.336.52	>19_TAG_RMVSA.192.52	>20_TAC_QRVSA.278.52	>21_TAC_ERVSV.423.52	>22_TAA_RITAA.412.52	>23_GTT_GTRAY.365.52	>24_GTG_HLIQY.143.52	>25_GTA_YTRQV.333.52	>26_GGT_ALKNM.293.52	>27_GGT_LTKDQ.900.52	>28_GGG_RSKER.1164.52	>29_GGC_TLKNQ.717.52	>30_GGA_LAKDQ.575.52	>31_GCT_KITKF.267.52	>32_GCC_VRLKY.180.52	>33_GCA_ALRQQ.169.52	>34_GAT_RTMRY.201.52	>35_GAG_VMRWY.183.52	>36_GAC_ATRRF.265.52	>37_GAA_RFQKF.196.52	>38_CTA_LHYAK.363.52	>39_CTA_IFNAK.484.52	>40_CGG_STRER.159.52	>41_CGC_RVMSR.221.52	>42_CGA_TFYAA.211.52	>43_CCT_MTNGK.429.52	>44_CCT_RGDSK.452.52	>45_CCG_RCYEK.560.52	>46_CCC_RLDSK.290.52	>47_CCA_KMTQK.1056.52	>48_CCA_EHNAK.884.52	>49_CAT_LSQSR.434.52	>51_CAG_MSHWR.400.52	>52_CAC_LGMRR.461.52
	NNCTAATTAGAANN	NNCGCATTAGCGNN	NNGCGTATTAAGNN	NNCTAATTACGANN	NNCTAATTAAGNN	NNGTTAATTAACNN	NNTTACTTAATGNN	NNACCCATTACTNN	NNCTAATTAGGGNN	NNTCATTAAAGNN	NNTTCATTAACANN	NNCGGATTAGTANN	NNTCCATTAATGNN	NNCGGATTATCANN	NNCTCATTAATGNN	NNTCAATTATGANN	NNCTTATTAATANN	NNCGTATTAGTCNN	NNGCGTATTACANN	NNGTAATTAGTANN	NNCTACTCAGGANN	NNTCCCTAAGTGNN	NNAACTACTTAAGNN	NNCGCCTTAGAGNN	NNCTCCTTATANN	NNCCCCCTCAAANN	NNCGCCTTAATTNN	NNTACTTAAGGANN	NNCGGCTTAGTCNN	NNTGTTAAGCCNN	NNCTCCTAAGTANN	NNTGCGCATCGANN	NNCCTCTCAACANN	NNCGTCTTATCCNN	NNGGTAAAGCATNN	NNCTAGTTAGACNN	NNGCTAGTTACANN	NNTCACGCCGAGNN	NNGATGTTAACANN	NNCTCGTTATTGNN	NNGTTGGTTATCNN	NNGCTGGTTAAANN	NNTCGGTTAAAANN	NNTCGGGTTACANN	NNCACTTAACCANN	NNGGTGGTTAATNN	NNTCGTGTTAATNN	NNCCTGTCAACANN	NNATGTGTTAGANN
	>1_TTT_RTVAA.201.53	>2_TTT_RTVSA.233.53	>4_TTC_VRVSA.189.53	>5_TTC_TRVAA.309.53	>6_TTA_VRVAA.579.53	>7_TTA_RVLRA.452.53	>8_TGT_RVVSQ.349.53	>9_TGG_KTTQD.527.53	>10_TGG_KSVMQ.323.53	>11_TGA_KSVAQ.554.53	>12_TGA_RGVAA.452.53	>13_TCT_ATVKA.553.53	>14_TCG_KGTQM.250.53	>15_TCC_RMIKS.259.53	>17_TAT_TRVSA.204.53	>18_TAG_RLTQA.333.53	>19_TAG_RMVSA.192.53	>20_TAC_QRVSA.270.53	>21_TAC_ERVSV.412.53	>22_TAA_RITAA.410.53	>23_GTT_GTRAY.363.53	>24_GTG_HLIQY.142.53	>25_GTA_YTRQV.333.53	>26_GGT_ALKNM.274.53	>27_GGT_LTKDQ.860.53	>28_GGG_RSKER.1161.53	>29_GGC_TLKNQ.713.53	>30_GGA_LAKDQ.554.53	>31_GCT_KITKF.264.53	>32_GCC_VRLKY.179.53	>33_GCA_ALRQQ.169.53	>34_GAT_RTMRY.199.53	>35_GAG_VMRWY.182.53	>36_GAC_ATRRF.262.53	>37_GAA_RFQKF.192.53	>38_CTA_LHYAK.359.53	>39_CTA_IFNAK.477.53	>40_CGG_STRER.155.53	>41_CGC_RVMSR.219.53	>42_CGA_TFYAA.205.53	>43_CCT_MTNGK.421.53	>44_CCT_RGDSK.441.53	>45_CCG_RCYEK.535.53	>46_CCC_RLDSK.274.53	>47_CCA_KMTQK.1046.53	>48_CCA_EHNAK.870.53	>49_CAT_LSQSR.407.53	>51_CAG_MSHWR.393.53	>52_CAC_LGMRR.445.53
	NNTAGTTAATTANN	NNGCATTAGCANN	NNCGTATTAAANN	NNCTCATTAAGGNN	NNCTCATTATAGNN	NNCTAATTAGGTNN	NNAATGCTAATGNN	NNCCCATTAAGNN	NNCGCATTAGCGNN	NNCTCATTACAANN	NNGTTAATTAAANN	NNGAGGATTAAANN	NNCCATTAGTANN	NNACCCTAATCCNN	NNTGTATTAATANN	NNTCATTAGTANN	NNTGCGTTAATANN	NNGCGTATTAGCNN	NNCGTATTATACNN	NNTCATTAGTANN	NNCATTTAAGTANN	NNGCGATAAGTGNN	NNCCTACTTAGANN	NNCCACCTTAAGNN	NNTTCCTTAGTANN	NNACCCCTTAAANN	NNCCGCCTTATGNN	NNACTCCTTAAGNN	NNCGGCTTAGCGNN	NNTGCTAAGCCNN	NNGCTACTTAAGNN	NNCATCTTAACANN	NNGCCTCTTACGNN	NNCGTCTTCAAANN	NNCCTTCTTAAANN	NNGGTAGTTAAGNN	NNCCTCGTTAAGNN	NNGTCCGTTAGTNN	NNCGCGTTAAAANN	NNCCTCGTTAGGNN	NNCTGGTTATAGNN	NNCCGGGTTAGANN	NNCCTGGTTAATNN	NNCCGGGTTAACNN	NNGCTAGTTAGTNN	NNGCTGGTTATGNN	NNACAGTTAACANN	NNGCCTGTTTACNN	NNCGTGTTAGTGNN
	>1_TTT_RTVAA.198.54	>2_TTT_RTVSA.231.54	>4_TTC_VRVSA.189.54	>5_TTC_TRVAA.305.54	>6_TTA_VRVAA.578.54	>7_TTA_RVLRA.443.54	>8_TGT_RVVSQ.339.54	>9_TGG_KTTQD.526.54	>10_TGG_KSVMQ.317.54	>11_TGA_KSVAQ.543.54	>12_TGA_RGVAA.440.54	>13_TCT_ATVKA.541.54	>14_TCG_KGTQM.247.54	>15_TCC_RMIKS.256.54	>17_TAT_TRVSA.193.54	>18_TAG_RLTQA.332.54	>19_TAG_RMVSA.190.54	>20_TAC_QRVSA.261.54	>21_TAC_ERVSV.398.54	>22_TAA_RITAA.393.54	>23_GTT_GTRAY.361.54	>24_GTG_HLIQY.137.54	>25_GTA_YTRQV.327.54	>26_GGT_ALKNM.269.54	>27_GGT_LTKDQ.836.54	>28_GGG_RSKER.1158.54	>29_GGC_TLKNQ.707.54	>30_GGA_LAKDQ.539.54	>31_GCT_KITKF.257.54	>32_GCC_VRLKY.177.54	>33_GCA_ALRQQ.162.54	>34_GAT_RTMRY.198.54	>35_GAG_VMRWY.181.54	>36_GAC_ATRRF.256.54	>37_GAA_RFQKF.189.54	>38_CTA_LHYAK.358.54	>39_CTA_IFNAK.466.54	>40_CGG_STRER.154.54	>41_CGC_RVMSR.219.54	>42_CGA_TFYAA.194.54	>43_CCT_MTNGK.408.54	>44_CCT_RGDSK.432.54	>45_CCG_RCYEK.522.54	>46_CCC_RLDSK.270.54	>47_CCA_KMTQK.1033.54	>48_CCA_EHNAK.831.54	>49_CAT_LSQSR.392.54	>51_CAG_MSHWR.386.54	>52_CAC_LGMRR.425.54
	NNTTATTAATTANN	NNCTCCTTAATANN	NNTGCATTAATGNN	NNTTTTTAATTANN	NNCTCATTAGACNN	NNTTACTAATTANN	NNCGCCTTAATGNN	NNCCCATTAGTCNN	NNTCATTAATGNN	NNCCTCATTAATNN	NNTTGTTAATTANN	NNCTGCTAATCCNN	NNCCCCATTAAGNN	NNCGGATTAAAGNN	NNCGCATTAGGANN	NNGCTCATTAAGNN	NNCAAATTAATANN	NNCGTATTAGCCNN	NNGCGTATTAGTNN	NNTAATTATGTNN	NNCGTCTAAGTANN	NNGAATTAAGTGNN	NNGACTTAAGTANN	NNCGCCTTAATGNN	NNTTCCTTAGTGNN	NNGCCCCTTAATNN	NNGCGCCTTATTNN	NNCTCCTTATTANN	NNCAGCTTAATGNN	NNCGGCTTAACANN	NNTAGCTAAGTANN	NNCGTCTTATAGNN	NNGCCTCTCTACNN	NNCGTCTTACTGNN	NNGCTTCTTAGTNN	NNGGTAGTTAGTNN	NNGGTAGTTATCNN	NNACCCGTTAAGNN	NNCGCGTTAGGANN	NNTCGTTAGCANN	NNGTCGGTTAATNN	NNCGGGTTAAATNN	NNCCTGGTTAGANN	NNGCGGGTTAGGNN	NNCCGTTAACCANN	NNGGTGGTTAAGNN	NNGTAGTTAACANN	NNCCTGTTAGTGNN	NNATGTGTCAAGNN
	>1_TTT_RTVAA.197.55	>2_TTT_RTVSA.219.55	>4_TTC_VRVSA.187.55	>5_TTC_TRVAA.298.55	>6_TTA_VRVAA.576.55	>7_TTA_RVLRA.442.55	>8_TGT_RVVSQ.338.55	>9_TGG_KTTQD.509.55	>10_TGG_KSVMQ.316.55	>11_TGA_KSVAQ.521.55	>12_TGA_RGVAA.440.55	>13_TCT_ATVKA.538.55	>14_TCG_KGTQM.237.55	>15_TCC_RMIKS.256.55	>17_TAT_TRVSA.190.55	>18_TAG_RLTQA.326.55	>19_TAG_RMVSA.187.55	>20_TAC_QRVSA.252.55	>21_TAC_ERVSV.396.55	>22_TAA_RITAA.387.55	>23_GTT_GTRAY.360.55	>24_GTG_HLIQY.135.55	>25_GTA_YTRQV.321.55	>26_GGT_ALKNM.250.55	>27_GGT_LTKDQ.825.55	>28_GGG_RSKER.1145.55	>29_GGC_TLKNQ.695.55	>30_GGA_LAKDQ.537.55	>31_GCT_KITKF.255.55	>32_GCC_VRLKY.175.55	>33_GCA_ALRQQ.156.55	>34_GAT_RTMRY.191.55	>35_GAG_VMRWY.181.55	>36_GAC_ATRRF.253.55	>37_GAA_RFQKF.187.55	>38_CTA_LHYAK.358.55	>39_CTA_IFNAK.453.55	>40_CGG_STRER.153.55	>41_CGC_RVMSR.218.55	>42_CGA_TFYAA.191.55	>43_CCT_MTNGK.403.55	>44_CCT_RGDSK.421.55	>45_CCG_RCYEK.521.55	>46_CCC_RLDSK.259.55	>47_CCA_KMTQK.1012.55	>48_CCA_EHNAK.800.55	>49_CAT_LSQSR.390.55	>51_CAG_MSHWR.386.55	>52_CAC_LGMRR.408.55
	NNTCCATTAATTNN	NNCAAATTAATGNN	NNCGTATTAATCNN	NNCTAATTAGATNN	NNCTTATTAATANN	NNTCGTTAATGANN	NNACTGTTAATGNN	NNGTCCATTAGANN	NNCTCATTAGGGNN	NNGTTCATTAAANN	NNCTCATTATTANN	NNGCGGATTATGNN	NNCCCATTAAGNN	NNGGGGATTAGANN	NNGATGCTAAACNN	NNTCATTAGTGNN	NNCACATTAATANN	NNCATATTAAGANN	NNCGCATTAAANN	NNCTAATTAATCNN	NNTTATTAAGTANN	NNTTTCTAAGTGNN	NNTAGCTAAGTANN	NNGCGCCTTAACANN	NNCTTCCTTAAANN	NNCCCCCTTAATNN	NNCGCCTTAGCANN	NNCTTCCTTATCNN	NNCTTCTTAGGGNN	NNCTCCTAAGCCNN	NNACTTTAAGTANN	NNCTTCTTAGTGNN	NNCCTCTTACGTNN	NNCGTCTTGGAANN	NNACTTCTTACANN	NNGCTAGTTAGCANN	NNGCTAGTTACTNN	NNTCCGTTATGANN	NNCACGTTAGGANN	NNCTCGTTAGTCNN	NNGATGGTTATCNN	NNCGGGTTAGAANN	NNTTGGTTAATANN	NNGGGTTAGTGNN	NNCCGTTAACTANN	NNTAGTTAAAANN	NNCGTGTTAACGNN	NNCTGTTAGGGNN	NNCCGTGTTACANN
	>1_TTT_RTVAA.192.56	>2_TTT_RTVSA.213.56	>4_TTC_VRVSA.180.56	>5_TTC_TRVAA.298.56	>6_TTA_VRVAA.549.56	>7_TTA_RVLRA.429.56	>8_TGT_RVVSQ.337.56	>9_TGG_KTTQD.485.56	>10_TGG_KSVMQ.315.56	>11_TGA_KSVAQ.496.56	>12_TGA_RGVAA.438.56	>13_TCT_ATVKA.536.56	>14_TCG_KGTQM.231.56	>15_TCC_RMIKS.255.56	>17_TAT_TRVSA.190.56	>18_TAG_RLTQA.322.56	>19_TAG_RMVSA.179.56	>20_TAC_QRVSA.251.56	>21_TAC_ERVSV.393.56	>22_TAA_RITAA.382.56	>23_GTT_GTRAY.355.56	>24_GTG_HLIQY.133.56	>25_GTA_YTRQV.317.56	>26_GGT_ALKNM.244.56	>27_GGT_LTKDQ.810.56	>28_GGG_RSKER.1122.56	>29_GGC_TLKNQ.674.56	>30_GGA_LAKDQ.529.56	>31_GCT_KITKF.253.56	>32_GCC_VRLKY.173.56	>33_GCA_ALRQQ.155.56	>34_GAT_RTMRY.184.56	>35_GAG_VMRWY.179.56	>36_GAC_ATRRF.251.56	>37_GAA_RFQKF.183.56	>38_CTA_LHYAK.340.56	>39_CTA_IFNAK.444.56	>40_CGG_STRER.152.56	>41_CGC_RVMSR.218.56	>42_CGA_TFYAA.189.56	>43_CCT_MTNGK.397.56	>44_CCT_RGDSK.420.56	>45_CCG_RCYEK.500.56	>46_CCC_RLDSK.241.56	>47_CCA_KMTQK.1006.56	>48_CCA_EHNAK.797.56	>49_CAT_LSQSR.389.56	>51_CAG_MSHWR.365.56	>52_CAC_LGMRR.403.56
	NNCTAATTAATTNN	NNGTTCTTAATANN	NNCGTATTAGGGNN	NNCTAATTAAAGNN	NNCCTAATTAAANN	NNCTCATTAATGNN	NNCTTCCTAATGNN	NNACCCATTAATNN	NNTACATTAATANN	NNGCTAATTAACNN	NNTCTCATTAACNN	NNGCGGATTAGANN	NNTCCCATTACTNN	NNGAGGATTATANN	NNGGCACTAATANN	NNGCTAATTAAANN	NNGCATTAGCGNN	NNCTAATTAATANN	NNCGTATTATTANN	NNCTAATTAAAGNN	NNATTTTAAGTANN	NNTCCACTTATGNN	NNGTACTAAGTANN	NNAGGGTTAAGANN	NNCTCCTTAGGANN	NNCCCCTTAATTNN	NNGCGCCTTACCNN	NNCTCCTTAAATNN	NNAGGGTTAAGANN	NNTGATTAAGCCNN	NNCTACTTAAGANN	NNCGTCTTAGTTNN	NNCCTCTCAAACNN	NNCGTCTCAACTNN	NNCTTCTTAGAGNN	NNCTAGTTAGGGNN	NNGCTCGTTAGTNN	NNCCCGTTAGGANN	NNCATGTTAACTNN	NNGCTCGTTTGANN	NNCTGGTTAATCNN	NNTAGGTTAGGNN	NNTGGTTAAACNN	NNGCAGGTTAATNN	NNGCTAGTTAAANN	NNCCTAGTTATANN	NNCAGTTAACANN	NNCCTGTTTAAGNN	NNCCGTGTTAAANN
	>1_TTT_RTVAA.187.57	>2_TTT_RTVSA.207.57	>4_TTC_VRVSA.180.57	>5_TTC_TRVAA.291.57	>6_TTA_VRVAA.534.57	>7_TTA_RVLRA.428.57	>8_TGT_RVVSQ.333.57	>9_TGG_KTTQD.481.57	>10_TGG_KSVMQ.315.57	>11_TGA_KSVAQ.490.57	>12_TGA_RGVAA.435.57	>13_TCT_ATVKA.524.57	>14_TCG_KGTQM.228.57	>15_TCC_RMIKS.254.57	>17_TAT_TRVSA.190.57	>18_TAG_RLTQA.317.57	>19_TAG_RMVSA.177.57	>20_TAC_QRVSA.251.57	>21_TAC_ERVSV.393.57	>22_TAA_RITAA.381.57	>23_GTT_GTRAY.349.57	>24_GTG_HLIQY.133.57	>25_GTA_YTRQV.317.57	>26_GGT_ALKNM.242.57	>27_GGT_LTKDQ.776.57	>28_GGG_RSKER.1113.57	>29_GGC_TLKNQ.668.57	>30_GGA_LAKDQ.527.57	>31_GCT_KITKF.253.57	>32_GCC_VRLKY.173.57	>33_GCA_ALRQQ.151.57	>34_GAT_RTMRY.173.57	>35_GAG_VMRWY.178.57	>36_GAC_ATRRF.248.57	>37_GAA_RFQKF.182.57	>38_CTA_LHYAK.339.57	>39_CTA_IFNAK.442.57	>40_CGG_STRER.148.57	>41_CGC_RVMSR.218.57	>42_CGA_TFYAA.185.57	>43_CCT_MTNGK.396.57	>44_CCT_RGDSK.417.57	>45_CCG_RCYEK.497.57	>46_CCC_RLDSK.235.57	>47_CCA_KMTQK.1005.57	>48_CCA_EHNAK.774.57	>49_CAT_LSQSR.380.57	>51_CAG_MSHWR.362.57	>52_CAC_LGMRR.403.57
	NNTTCATTAATTNN	NNTTCACTAATANN	NNCGAATTAGCANN	NNTAATTAATTNN	NNCTCATTATGANN	NNGCTCTAATTANN	NNCACATTAAAANN	NNGTCCATTAAANN	NNCACATTAGGGNN	NNTCTCATTAAGNN	NNTGCTTAATTANN	NNCGGATTAACNN	NNCCTATTAATGNN	NNGGATTAATANN	NNCATATTAACANN	NNCTCATTAAGANN	NNGCGCATTAATNN	NNCGTATTACTGNN	NNCGCATTATAANN	NNACTGCAAAAGNN	NNTGTTTAAGTANN	NNTCGCTAAGTGNN	NNCTCCTAAGTANN	NNTCGCCTTAGANN	NNGCTCCTTAACNN	NNCCCCTTACAANN	NNTCGCCTTAGCNN	NNCTCCTTATANN	NNTGTCTTAAGANN	NNGGCTTAAGCNN	NNCCCATAAGTANN	NNCGTCTTACTANN	NNGCCTCTTCAGNN	NNCGTCTTAGGNN	NNACTTCTTAGTNN	NNGCTAGTTAACNN	NNGCTCGTTACGNN	NNAGATTAACGGNN	NNCGTGTTAATTNN	NNCTCGTTAATCNN	NNGTTGGTTAGTNN	NNCGGGTTATGANN	NNCCAGTTAAACNN	NNTCTGGTTATANN	NNGCTGGTTAAANN	NNGCTAGTTAAANN	NNATCGTTAACANN	NNCTGTCAGCANN	NNGTGTGTTTCANN
	>1_TTT_RTVAA.185.58	>2_TTT_RTVSA.204.58	>4_TTC_VRVSA.177.58	>5_TTC_TRVAA.290.58	>6_TTA_VRVAA.528.58	>7_TTA_RVLRA.420.58	>8_TGT_RVVSQ.331.58	>9_TGG_KTTQD.478.58	>10_TGG_KSVMQ.313.58	>11_TGA_KSVAQ.477.58	>12_TGA_RGVAA.424.58	>13_TCT_ATVKA.513.58	>14_TCG_KGTQM.228.58	>15_TCC_RMIKS.246.58	>17_TAT_TRVSA.188.58	>18_TAG_RLTQA.315.58	>19_TAG_RMVSA.177.58	>20_TAC_QRVSA.247.58	>21_TAC_ERVSV.368.58	>22_TAA_RITAA.380.58	>23_GTT_GTRAY.348.58	>24_GTG_HLIQY.132.58	>25_GTA_YTRQV.316.58	>26_GGT_ALKNM.227.58	>27_GGT_LTKDQ.771.58	>28_GGG_RSKER.1090.58	>29_GGC_TLKNQ.666.58	>30_GGA_LAKDQ.519.58	>31_GCT_KITKF.251.58	>32_GCC_VRLKY.162.58	>33_GCA_ALRQQ.149.58	>34_GAT_RTMRY.171.58	>35_GAG_VMRWY.175.58	>36_GAC_ATRRF.248.58	>37_GAA_RFQKF.180.58	>38_CTA_LHYAK.332.58	>39_CTA_IFNAK.429.58	>40_CGG_STRER.135.58	>41_CGC_RVMSR.214.58	>42_CGA_TFYAA.183.58	>43_CCT_MTNGK.395.58	>44_CCT_RGDSK.414.58	>45_CCG_RCYEK.485.58	>46_CCC_RLDSK.225.58	>47_CCA_KMTQK.991.58	>48_CCA_EHNAK.769.58	>49_CAT_LSQSR.372.58	>51_CAG_MSHWR.353.58	>52_CAC_LGMRR.388.58
	NNAGCTTAATTANN	NNCGCATTATGGNN	NNCGAGATAATANN	NNCCTAATTAAGNN	NNCTAATTAGAANN	NNCTCATAATTANN	NNGTAGCCAATGNN	NNGCCCATTACTNN	NNCACATTAATANN	NNCTAATTAACCNN	NNCTCATTAAGGNN	NNTGGATTAGAGNN	NNGTCTAATCGANN	NNTGTTTAATCCNN	NNCGCATTAAGNN	NNCCCAATTAAGNN	NNCATATTAGTANN	NNCGCATTAGGANN	NNCGCATTATANN	NNCTAATTAACGNN	NNGTCTTAAGTANN	NNCTCCTAAGTGNN	NNCTCGTAAGTANN	NNCCTATCAGCNN	NNTTCCTTAACGNN	NNCCCCTCAACNN	NNGCACCTTAACNN	NNCTCCTTAGTCNN	NNCGGCTTATAGNN	NNTGTCTTAAGCNN	NNGCTCTAAGTANN	NNCTTCTTAACANN	NNCCTCTTAAANN	NNCGTCTTATAGNN	NNCTTCTTAACGNN	NNCTAGTTAGAGNN	NNACTCGTTATCNN	NNGCCCGTTATANN	NNAGAGTTAACANN	NNCTTGTTAAGANN	NNCCTGGTTATANN	NNGCAGGTTAGANN	NNTCGGTTAAAGNN	NNGGGTTAGCANN	NNCTAGTTAATGNN	NNTCTAGTTAACNN	NNACCTTAACANN	NNCCTGTTAGAANN	NNCCGTGTTAAGNN
	>1_TTT_RTVAA.182.59	>2_TTT_RTVSA.203.59	>4_TTC_VRVSA.177.59	>5_TTC_TRVAA.290.59	>6_TTA_VRVAA.524.59	>7_TTA_RVLRA.419.59	>8_TGT_RVVSQ.329.59	>9_TGG_KTTQD.467.59	>10_TGG_KSVMQ.308.59	>11_TGA_KSVAQ.462.59	>12_TGA_RGVAA.417.59	>13_TCT_ATVKA.489.59	>14_TCG_KGTQM.215.59	>15_TCC_RMIKS.244.59	>17_TAT_TRVSA.179.59	>18_TAG_RLTQA.313.59	>19_TAG_RMVSA.175.59	>20_TAC_QRVSA.242.59	>21_TAC_ERVSV.368.59	>22_TAA_RITAA.359.59	>23_GTT_GTRAY.346.59	>24_GTG_HLIQY.131.59	>25_GTA_YTRQV.312.59	>26_GGT_ALKNM.225.59	>27_GGT_LTKDQ.719.59	>28_GGG_RSKER.1081.59	>29_GGC_TLKNQ.656.59	>30_GGA_LAKDQ.508.59	>31_GCT_KITKF.242.59	>32_GCC_VRLKY.157.59	>33_GCA_ALRQQ.148.59	>34_GAT_RTMRY.170.59	>35_GAG_VMRWY.172.59	>36_GAC_ATRRF.246.59	>37_GAA_RFQKF.164.59	>38_CTA_LHYAK.322.59	>39_CTA_IFNAK.424.59	>40_CGG_STRER.134.59	>41_CGC_RVMSR.208.59	>42_CGA_TFYAA.179.59	>43_CCT_MTNGK.394.59	>44_CCT_RGDSK.413.59	>45_CCG_RCYEK.485.59	>46_CCC_RLDSK.224.59	>47_CCA_KMTQK.990.59	>48_CCA_EHNAK.764.59	>49_CAT_LSQSR.372.59	>51_CAG_MSHWR.350.59	>52_CAC_LGMRR.387.59
	NNCCTAATTATANN	NNATCACTAATTNN	NNGCGCATTAATNN	NNCTCATTAAANN	NNCTAATTATAGNN	NNGATTTAATTANN	NNTGTACTAATGNN	NNGTCCATTAATNN	NNCTCATTAGGANN	NNCTAATTAAGGNN	NNTTAATTAGTGNN	NNAGGATTAGCGNN	NNCCCATTAACCNN	NNTGGATTAGTANN	NNCGAATTAGTGNN	NNCCAATTACCANN	NNCACATTAACANN	NNCGTATTAATTNN	NNGCGCATTACGNN	NNCTAATTATCNN	NNCCTACTTAGANN	NNCCCACTTATGNN	NNTGTCTAAGTANN	NNCGCCTTAGTANN	NNTTCCTTAACANN	NNGTCTTAAGGGNN	NNCGCCTTATGNN	NNCTCCTTAAGTNN	NNCTTCTTAACANN	NNCTTCTAAGCCNN	NNTCTTTAAGTANN	NNCGTCTTAAATNN	NNCCTCTTAGAANN	NNCGTCTCAAAGNN	NNCTTCTTAATGNN	NNACTAGTTATCNN	NNGCTCGTTATGNN	NNACCCGTTAATNN	NNACTCTTAACANN	NNGCTCGTTACTNN	NNTGGTTATTANN	NNACAGGTTAAGNN	NNCTTGGTTAAGNN	NNGCGCGTTAAANN	NNGCTAGTTAGANN	NNGCTAGTTATCNN	NNCTACTTAACANN	NNCTGTCAATCNN	NNTGTGTTAGCGNN
	>1_TTT_RTVAA.180.60	>2_TTT_RTVSA.203.60	>4_TTC_VRVSA.171.60	>5_TTC_TRVAA.286.60	>6_TTA_VRVAA.522.60	>7_TTA_RVLRA.415.60	>8_TGT_RVVSQ.326.60	>9_TGG_KTTQD.457.60	>10_TGG_KSVMQ.304.60	>11_TGA_KSVAQ.458.60	>12_TGA_RGVAA.402.60	>13_TCT_ATVKA.485.60	>14_TCG_KGTQM.213.60	>15_TCC_RMIKS.242.60	>17_TAT_TRVSA.174.60	>18_TAG_RLTQA.295.60	>19_TAG_RMVSA.172.60	>20_TAC_QRVSA.242.60	>21_TAC_ERVSV.362.60	>22_TAA_RITAA.357.60	>23_GTT_GTRAY.345.60	>24_GTG_HLIQY.130.60	>25_GTA_YTRQV.310.60	>26_GGT_ALKNM.206.60	>27_GGT_LTKDQ.709.60	>28_GGG_RSKER.1044.60	>29_GGC_TLKNQ.639.60	>30_GGA_LAKDQ.495.60	>31_GCT_KITKF.240.60	>32_GCC_VRLKY.155.60	>33_GCA_ALRQQ.148.60	>34_GAT_RTMRY.169.60	>35_GAG_VMRWY.171.60	>36_GAC_ATRRF.243.60	>37_GAA_RFQKF.164.60	>38_CTA_LHYAK.321.60	>39_CTA_IFNAK.416.60	>40_CGG_STRER.130.60	>41_CGC_RVMSR.208.60	>42_CGA_TFYAA.178.60	>43_CCT_MTNGK.390.60	>44_CCT_RGDSK.413.60	>45_CCG_RCYEK.472.60	>46_CCC_RLDSK.218.60	>47_CCA_KMTQK.916.60	>48_CCA_EHNAK.763.60	>49_CAT_LSQSR.367.60	>51_CAG_MSHWR.343.60	>52_CAC_LGMRR.379.60
	NNTGGTTAATTANN	NNCACATTAGCANN	NNCATATTAAGANN	NNAGTTTAATTANN	NNCTCATTATCANN	NNTTGCTAATTANN	NNCGTGATAATGNN	NNATCAGTCCTTNN	NNAGTGCTTCACNN	NNTTCATTAGCANN	NNTTAATTAGTCNN	NNCCGGATTAATNN	NNCTCATTAATGNN	NNCTCCTAATCCNN	NNCTAATTAATANN	NNCCAATTAGGANN	NNCATATTAATANN	NNGCGTATTAGTNN	NNCGCATTATAGNN	NNGCTAATTATCNN	NNCCTACTTAATNN	NNGGCACTTATGNN	NNCTACTTACGNN	NNGCGCATGAGANN	NNCTCCTTAAATNN	NNCTATAAGAGGNN	NNTCACCTTAAGNN	NNTTCCTTAGTGNN	NNCTTCTTAGAGNN	NNTGTCTAAGCCNN	NNGTTATAAGTANN	NNCGTCTTAGGTNN	NNCCTCTTCAGANN	NNCGTCTCAAGGNN	NNCTTCTTAGGANN	NNTCTAGTTAATNN	NNGCTCGTTACANN	NNTCCCGTTATANN	NNGACGTTAACANN	NNTCTCGTTATANN	NNCTGGTTAACCNN	NNCTTTATAACTNN	NNTTGGTTAAAGNN	NNTTTACATCTGNN	NNGCTAGTTACGNN	NNACTGGTTACGNN	NNGGTGTTAACANN	NNGCCTGTTAGANN	NNCTGTGTTATANN
	>1_TTT_RTVAA.180.61	>2_TTT_RTVSA.201.61	>4_TTC_VRVSA.168.61	>5_TTC_TRVAA.283.61	>6_TTA_VRVAA.489.61	>7_TTA_RVLRA.408.61	>8_TGT_RVVSQ.323.61	>9_TGG_KTTQD.451.61	>10_TGG_KSVMQ.300.61	>11_TGA_KSVAQ.442.61	>12_TGA_RGVAA.395.61	>13_TCT_ATVKA.482.61	>14_TCG_KGTQM.203.61	>15_TCC_RMIKS.241.61	>17_TAT_TRVSA.170.61	>18_TAG_RLTQA.292.61	>19_TAG_RMVSA.172.61	>20_TAC_QRVSA.237.61	>21_TAC_ERVSV.359.61	>22_TAA_RITAA.313.61	>23_GTT_GTRAY.338.61	>24_GTG_HLIQY.128.61	>25_GTA_YTRQV.309.61	>26_GGT_ALKNM.204.61	>27_GGT_LTKDQ.703.61	>28_GGG_RSKER.1017.61	>29_GGC_TLKNQ.634.61	>30_GGA_LAKDQ.494.61	>31_GCT_KITKF.234.61	>32_GCC_VRLKY.152.61	>33_GCA_ALRQQ.147.61	>34_GAT_RTMRY.169.61	>35_GAG_VMRWY.169.61	>36_GAC_ATRRF.240.61	>37_GAA_RFQKF.161.61	>38_CTA_LHYAK.317.61	>39_CTA_IFNAK.381.61	>40_CGG_STRER.130.61	>41_CGC_RVMSR.207.61	>42_CGA_TFYAA.178.61	>43_CCT_MTNGK.387.61	>44_CCT_RGDSK.397.61	>45_CCG_RCYEK.455.61	>46_CCC_RLDSK.217.61	>47_CCA_KMTQK.883.61	>48_CCA_EHNAK.752.61	>49_CAT_LSQSR.362.61	>51_CAG_MSHWR.335.61	>52_CAC_LGMRR.378.61
	NNCTAATTACANN	NNTGCACTAATANN	NNCTAATTAACANN	NNCTAATTAACCNN	NNCTAATCAATANN	NNTTAATTAGCGNN	NNAGTGCTAATGNN	NNTCCATTAACANN	NNTACATTAATGNN	NNCTCATTAACTNN	NNTCCTGACAGTNN	NNGGATTAAAANN	NNTCCCATTAATNN	NNCTACTAATCCNN	NNCGCGTTAATANN	NNCCCAATTAAANN	NNCTAATTATGANN	NNGCGTATTAAGNN	NNCCGCATTAAGNN	NNCTAATTATANN	NNCTCCTAAGTANN	NNGCTTTAAGTGNN	NNGACATAAGTANN	NNGCCTTAGTGNN	NNTTCCTTAAAANN	NNCCCCCTTACANN	NNCGCCTTAGAANN	NNCTCCTTAGANN	NNCGGCTTATCCNN	NNCGCCTAAGCCNN	NNCATCTAAGTANN	NNCTACTTAGTANN	NNCCTCTTACCANN	NNCGTCTCAGGTNN	NNGCTTCTTATCNN	NNGCTGGTTAATNN	NNACTAGTTAAGNN	NNCCCGTTAGGGNN	NNCGTGTTAGTNN	NNACTCGTTATANN	NNGAAGGTTATGNN	NNGCGGGTTACGNN	NNCTGGTTAGGANN	NNCGGGTTAGTTNN	NNCCTAGTTAGTNN	NNGCGTTAACCANN	NNGCCGTTAACANN	NNCTGTTTACGNN	NNCTGTGTCAAANN
	>1_TTT_RTVAA.178.62	>2_TTT_RTVSA.199.62	>4_TTC_VRVSA.162.62	>5_TTC_TRVAA.283.62	>6_TTA_VRVAA.469.62	>7_TTA_RVLRA.400.62	>8_TGT_RVVSQ.316.62	>9_TGG_KTTQD.448.62	>10_TGG_KSVMQ.298.62	>11_TGA_KSVAQ.435.62	>12_TGA_RGVAA.377.62	>13_TCT_ATVKA.474.62	>14_TCG_KGTQM.201.62	>15_TCC_RMIKS.241.62	>17_TAT_TRVSA.170.62	>18_TAG_RLTQA.291.62	>19_TAG_RMVSA.170.62	>20_TAC_QRVSA.236.62	>21_TAC_ERVSV.359.62	>22_TAA_RITAA.304.62	>23_GTT_GTRAY.337.62	>24_GTG_HLIQY.127.62	>25_GTA_YTRQV.300.62	>26_GGT_ALKNM.201.62	>27_GGT_LTKDQ.659.62	>28_GGG_RSKER.999.62	>29_GGC_TLKNQ.622.62	>30_GGA_LAKDQ.491.62	>31_GCT_KITKF.234.62	>32_GCC_VRLKY.151.62	>33_GCA_ALRQQ.144.62	>34_GAT_RTMRY.166.62	>35_GAG_VMRWY.169.62	>36_GAC_ATRRF.237.62	>37_GAA_RFQKF.154.62	>38_CTA_LHYAK.314.62	>39_CTA_IFNAK.358.62	>40_CGG_STRER.122.62	>41_CGC_RVMSR.203.62	>42_CGA_TFYAA.164.62	>43_CCT_MTNGK.382.62	>44_CCT_RGDSK.367.62	>45_CCG_RCYEK.454.62	>46_CCC_RLDSK.209.62	>47_CCA_KMTQK.851.62	>48_CCA_EHNAK.740.62	>49_CAT_LSQSR.358.62	>51_CAG_MSHWR.332.62	>52_CAC_LGMRR.373.62
	NNTTCATTAGGGNN	NNTACATTAATANN	NNGCGACTAATGNN	NNCTAATTAGACNN	NNCTAATTACGTNN	NNATCGTAATTANN	NNTTTTTTAATGNN	NNCCATTAATANN	NNTTCATTAATGNN	NNCTAATTAACANN	NNTAATTAGGGNN	NNAGGTTAATCCNN	NNCCCATTAAGCNN	NNATACTAATCCNN	NNCTAATTAGGGNN	NNCCAATTAAGNN	NNGCTCATTAAGNN	NNCGTGTTAGTNN	NNCGTATTAGCCNN	NNCTACTAACTTNN	NNTAGTTAAGTANN	NNCCACTTAAACNN	NNTCGCTAAGTANN	NNGCACCTTATANN	NNCCTCCTTATGNN	NNCCCCTTAAACNN	NNTCGCCTTATANN	NNTTCCTTAACNN	NNCGGCTTATGCNN	NNGAATTAAGCCNN	NNATGTTAAGTANN	NNCGTCTCAAGANN	NNCCTCTTAGTTNN	NNGCGTCTTAGCNN	NNCCTACTTAAGNN	NNCTAGTTATGNN	NNGCTCGTTAACNN	NNCCCGTTAGAANN	NNCATGTTAAAANN	NNACTCGTTACTNN	NNTCTAGTTAAGNN	NNGATGGTTAAGNN	NNCTGGTTAAANN	NNCGGGTTAATCNN	NNCTGGTTACAGNN	NNAGTTAAACGCNN	NNAACTTTAACANN	NNACTGTTAGTGNN	NNGCGTGTTAATNN
	>1_TTT_RTVAA.177.63	>2_TTT_RTVSA.194.63	>4_TTC_VRVSA.162.63	>5_TTC_TRVAA.281.63	>6_TTA_VRVAA.453.63	>7_TTA_RVLRA.399.63	>8_TGT_RVVSQ.315.63	>9_TGG_KTTQD.447.63	>10_TGG_KSVMQ.295.63	>11_TGA_KSVAQ.428.63	>12_TGA_RGVAA.372.63	>13_TCT_ATVKA.472.63	>14_TCG_KGTQM.197.63	>15_TCC_RMIKS.237.63	>17_TAT_TRVSA.169.63	>18_TAG_RLTQA.286.63	>19_TAG_RMVSA.164.63	>20_TAC_QRVSA.229.63	>21_TAC_ERVSV.336.63	>22_TAA_RITAA.302.63	>23_GTT_GTRAY.333.63	>24_GTG_HLIQY.123.63	>25_GTA_YTRQV.299.63	>26_GGT_ALKNM.198.63	>27_GGT_LTKDQ.658.63	>28_GGG_RSKER.945.63	>29_GGC_TLKNQ.588.63	>30_GGA_LAKDQ.480.63	>31_GCT_KITKF.222.63	>32_GCC_VRLKY.148.63	>33_GCA_ALRQQ.140.63	>34_GAT_RTMRY.165.63	>35_GAG_VMRWY.163.63	>36_GAC_ATRRF.237.63	>37_GAA_RFQKF.149.63	>38_CTA_LHYAK.308.63	>39_CTA_IFNAK.333.63	>40_CGG_STRER.120.63	>41_CGC_RVMSR.200.63	>42_CGA_TFYAA.159.63	>43_CCT_MTNGK.375.63	>44_CCT_RGDSK.367.63	>45_CCG_RCYEK.454.63	>46_CCC_RLDSK.185.63	>47_CCA_KMTQK.839.63	>48_CCA_EHNAK.735.63	>49_CAT_LSQSR.349.63	>51_CAG_MSHWR.325.63	>52_CAC_LGMRR.372.63
	NNTTCATTAACANN	NNGCTAATTAACNN	NNCATATTAGTGNN	NNCTCATTAGCGNN	NNCCTAATTACANN	NNCCTAATTATANN	NNTGTCTTAATGNN	NNACCCATTAAANN	NNCCCATTAAAGNN	NNCCTCATTATGNN	NNTGGTTAATTANN	NNGCGGATTAGTNN	NNCCAATTAAAANN	NNGAGGATTAAGNN	NNGCATTAGCGNN	NNTCCAATTAAANN	NNACATTAGCANN	NNCGCATTATGTNN	NNCGTATTAGTANN	NNCTAATTAGAANN	NNCTCGTAAGTANN	NNGCCCTAAGTGNN	NNCTACTTAAGANN	NNGCGCCTTAGTGNN	NNCTCCTTAGTCNN	NNGCCTTAAGGGNN	NNCGCCTTATACNN	NNTCTCCTTAATNN	NNCGTCTTACGANN	NNTTGTTAAGAANN	NNCTTCTAAGTANN	NNCGTCTTAATTNN	NNCCCTCTCACANN	NNGCGTCTTATANN	NNACTTCTTAGANN	NNCTAGTTAAAANN	NNACTCGTTAACNN	NNTCCCGTTAATTNN	NNTCGTGTTAAGNN	NNCTCGTTATGTNN	NNGTAGGTTAACNN	NNGCAGGTTAATNN	NNCTGGTTAAGNN	NNCGGGTTAATTNN	NNGCTGGTTATGNN	NNCGCTTAACCANN	NNCCTCTTAACANN	NNCTGTTACTGNN	NNGTGTGTTCAGNN
	>1_TTT_RTVAA.172.64	>2_TTT_RTVSA.186.64	>4_TTC_VRVSA.161.64	>5_TTC_TRVAA.280.64	>6_TTA_VRVAA.442.64	>7_TTA_RVLRA.398.64	>8_TGT_RVVSQ.315.64	>9_TGG_KTTQD.442.64	>10_TGG_KSVMQ.287.64	>11_TGA_KSVAQ.417.64	>12_TGA_RGVAA.370.64	>13_TCT_ATVKA.470.64	>14_TCG_KGTQM.185.64	>15_TCC_RMIKS.235.64	>17_TAT_TRVSA.162.64	>18_TAG_RLTQA.285.64	>19_TAG_RMVSA.163.64	>20_TAC_QRVSA.226.64	>21_TAC_ERVSV.323.64	>22_TAA_RITAA.301.64	>23_GTT_GTRAY.333.64	>24_GTG_HLIQY.123.64	>25_GTA_YTRQV.296.64	>26_GGT_ALKNM.189.64	>27_GGT_LTKDQ.652.64	>28_GGG_RSKER.942.64	>29_GGC_TLKNQ.588.64	>30_GGA_LAKDQ.467.64	>31_GCT_KITKF.219.64	>32_GCC_VRLKY.145.64	>33_GCA_ALRQQ.140.64	>34_GAT_RTMRY.163.64	>35_GAG_VMRWY.161.64	>36_GAC_ATRRF.228.64	>37_GAA_RFQKF.148.64	>38_CTA_LHYAK.306.64	>39_CTA_IFNAK.332.64	>40_CGG_STRER.119.64	>41_CGC_RVMSR.197.64	>42_CGA_TFYAA.154.64	>43_CCT_MTNGK.363.64	>44_CCT_RGDSK.366.64	>45_CCG_RCYEK.449.64	>46_CCC_RLDSK.179.64	>47_CCA_KMTQK.834.64	>48_CCA_EHNAK.732.64	>49_CAT_LSQSR.341.64	>51_CAG_MSHWR.325.64	>52_CAC_LGMRR.364.64
	NNTCTAATTATCNN	NNGCACATTAAANN	NNGTATTAACANN	NNTAATTAGGGNN	NNCTAATTAACGNN	NNGTACTAATTANN	NNCTGCTTAATGNN	NNGCCCATTAATANN	NNCTAATTAATGNN	NNCTCATTAACNN	NNTAATTAAAGNN	NNGGATTAGTGNN	NNCCCATTACGTNN	NNGGCTTAATCCNN	NNCGTATTAAACNN	NNCTAATTAAGGNN	NNCGCATTAGAGNN	NNTACATAATGANN	NNTCGTATTAAGNN	NNCTCATTAAGTNN	NNCCTACTTATANN	NNTCCTTAAGTGNN	NNCTTTTAAGTANN	NNATGCCTCAAANN	NNCTCCTTAGTNN	NNCCCCTTAACTNN	NNCGCCTTAAANN	NNCTCCTTAACTNN	NNAGTGCTTCACNN	NNTGCTTAAGCTNN	NNGACATAAGTANN	NNCGTCTTAAGTNN	NNCCTCTTTACANN	NNCGTCTTATGGNN	NNGCGTTAAGAANN	NNCTAGTTAACGNN	NNCTAGTTAAGGNN	NNCCCGTTAATCNN	NNCGCGTTAGCGNN	NNGCTCGTTACCNN	NNTTTGGTTAACNN	NNCGGGTTATAANN	NNCCGGTTAAAANN	NNCCGGGTTAAANN	NNCTAGTTAAATNN	NNGCTAGTTATTNN	NNCCGTGTTAAANN	NNCCCTGTTACANN	NNGCGTGTTTAANN
	>1_TTT_RTVAA.170.65	>2_TTT_RTVSA.186.65	>4_TTC_VRVSA.161.65	>5_TTC_TRVAA.267.65	>6_TTA_VRVAA.439.65	>7_TTA_RVLRA.389.65	>8_TGT_RVVSQ.314.65	>9_TGG_KTTQD.434.65	>10_TGG_KSVMQ.277.65	>11_TGA_KSVAQ.413.65	>12_TGA_RGVAA.365.65	>13_TCT_ATVKA.462.65	>14_TCG_KGTQM.182.65	>15_TCC_RMIKS.235.65	>17_TAT_TRVSA.157.65	>18_TAG_RLTQA.285.65	>19_TAG_RMVSA.161.65	>20_TAC_QRVSA.225.65	>21_TAC_ERVSV.320.65	>22_TAA_RITAA.299.65	>23_GTT_GTRAY.329.65	>24_GTG_HLIQY.122.65	>25_GTA_YTRQV.291.65	>26_GGT_ALKNM.186.65	>27_GGT_LTKDQ.648.65	>28_GGG_RSKER.926.65	>29_GGC_TLKNQ.555.65	>30_GGA_LAKDQ.459.65	>31_GCT_KITKF.216.65	>32_GCC_VRLKY.142.65	>33_GCA_ALRQQ.140.65	>34_GAT_RTMRY.161.65	>35_GAG_VMRWY.159.65	>36_GAC_ATRRF.227.65	>37_GAA_RFQKF.145.65	>38_CTA_LHYAK.300.65	>39_CTA_IFNAK.318.65	>40_CGG_STRER.115.65	>41_CGC_RVMSR.196.65	>42_CGA_TFYAA.154.65	>43_CCT_MTNGK.359.65	>44_CCT_RGDSK.365.65	>45_CCG_RCYEK.449.65	>46_CCC_RLDSK.178.65	>47_CCA_KMTQK.834.65	>48_CCA_EHNAK.725.65	>49_CAT_LSQSR.340.65	>51_CAG_MSHWR.324.65	>52_CAC_LGMRR.363.65
	NNCTAATTAGATNN	NNCTCATTATGANN	NNGCTAATTAAANN	NNTGTTAATTANN	NNCCTCATTAAANN	NNTTCATTAGTGNN	NNACCGCTAATGNN	NNCCCATTACGANN	NNTCCATTAATTNN	NNCTCATTAAGNN	NNCTCATTAAGANN	NNAGGATTAAAGNN	NNTTTCAAGTCANN	NNTTACTAATCCNN	NNGCGCATTAACNN	NNGTCAATTAACNN	NNCTCATTAAGGNN	NNCGCATTAGAANN	NNCGCATTAGGGNN	NNCCGTGTTAGTNN	NNCTTTTAAGTANN	NNGCCACTTTAANN	NNATGCTAAGTANN	NNGCACCTTATGNN	NNCTCCTTACGANN	NNCCCCTTAAGNN	NNTCGCCTTTAANN	NNTTCCTTATCANN	NNGGTTTAAGCCNN	NNGCATTAAGCCNN	NNTTTTAAGTANN	NNGTGTCTTAACNN	NNCCTCTTACACNN	NNGCGTCTTACANN	NNACCCTAGTAANN	NNAGGGTTAAGANN	NNGCTAGTTAACNN	NNCCGTTAGGGNN	NNCCGTGTTAAGNN	NNCTCGTTAGCGNN	NNTTGGTTAATANN	NNGCTGGTTACANN	NNGCTGGTTAACNN	NNACAGGTTAAGNN	NNGTGCTAACTANN	NNGATGGTTAGANN	NNTAACTAACTANN	NNCCCTGTTAGCNN	NNCGTGTCAAAGNN
	>1_TTT_RTVAA.168.66	>2_TTT_RTVSA.186.66	>4_TTC_VRVSA.160.66	>5_TTC_TRVAA.264.66	>6_TTA_VRVAA.430.66	>7_TTA_RVLRA.388.66	>8_TGT_RVVSQ.314.66	>9_TGG_KTTQD.434.66	>10_TGG_KSVMQ.275.66	>11_TGA_KSVAQ.404.66	>12_TGA_RGVAA.355.66	>13_TCT_ATVKA.461.66	>14_TCG_KGTQM.181.66	>15_TCC_RMIKS.234.66	>17_TAT_TRVSA.154.66	>18_TAG_RLTQA.285.66	>19_TAG_RMVSA.161.66	>20_TAC_QRVSA.221.66	>21_TAC_ERVSV.317.66	>22_TAA_RITAA.265.66	>23_GTT_GTRAY.326.66	>24_GTG_HLIQY.122.66	>25_GTA_YTRQV.289.66	>26_GGT_ALKNM.185.66	>27_GGT_LTKDQ.642.66	>28_GGG_RSKER.914.66	>29_GGC_TLKNQ.551.66	>30_GGA_LAKDQ.457.66	>31_GCT_KITKF.211.66	>32_GCC_VRLKY.136.66	>33_GCA_ALRQQ.135.66	>34_GAT_RTMRY.159.66	>35_GAG_VMRWY.158.66	>36_GAC_ATRRF.227.66	>37_GAA_RFQKF.142.66	>38_CTA_LHYAK.294.66	>39_CTA_IFNAK.313.66	>40_CGG_STRER.115.66	>41_CGC_RVMSR.194.66	>42_CGA_TFYAA.153.66	>43_CCT_MTNGK.357.66	>44_CCT_RGDSK.351.66	>45_CCG_RCYEK.447.66	>46_CCC_RLDSK.175.66	>47_CCA_KMTQK.832.66	>48_CCA_EHNAK.713.66	>49_CAT_LSQSR.329.66	>51_CAG_MSHWR.322.66	>52_CAC_LGMRR.362.66
	NNTGGCTAATTANN	NNCTTGTTAATGNN	NNCGCATTAGAANN	NNCTAATTACANN	NNCTAATTATACNN	NNTGTTAATTANN	NNCTTGCTAATGNN	NNGCCCATTAGTNN	NNCCAATTAGTGNN	NNGCTCATTATGNN	NNCTCATTAAAGNN	NNAGGGATTAGTNN	NNCCAATTAACANN	NNACGTTAATCCNN	NNGCGTATTAGTNN	NNCCAATTAATCNN	NNATCACTAATTNN	NNCTTATTAATANN	NNCGTATTAGGANN	NNCTCATTAAGGNN	NNAGTTAAGTANN	NNCCACTTAGACNN	NNCACGTAAGTANN	NNGCGCCTCAATNN	NNCCTCCTTATANN	NNCCCCTTAACCNN	NNGCACCTTAGANN	NNTTCCTTAGGTNN	NNCGTCTTAACTNN	NNGTCATAAGCCNN	NNAACTTAAGTANN	NNCGTCTTATANN	NNCCTCTTATGGNN	NNCGTCTTAACANN	NNACTTCTTATCNN	NNCCTAGTTAGTANN	NNACTAGTTATGNN	NNTTCCGTTATGNN	NNTTTGTTAACANN	NNTCTCGTTATCNN	NNCTGGTTATTGNN	NNGGGTTAGTGNN	NNCTGGTTAATCNN	NNCGGGTTAAATNN	NNCCGCTAACTANN	NNAGTGGTTAACNN	NNCCGTGTTAATNN	NNCTGTTTCGANN	NNCGTGTTAGGGNN
	>1_TTT_RTVAA.168.67	>2_TTT_RTVSA.178.67	>4_TTC_VRVSA.160.67	>5_TTC_TRVAA.263.67	>6_TTA_VRVAA.430.67	>7_TTA_RVLRA.387.67	>8_TGT_RVVSQ.311.67	>9_TGG_KTTQD.419.67	>10_TGG_KSVMQ.268.67	>11_TGA_KSVAQ.397.67	>12_TGA_RGVAA.355.67	>13_TCT_ATVKA.457.67	>14_TCG_KGTQM.180.67	>15_TCC_RMIKS.233.67	>17_TAT_TRVSA.152.67	>18_TAG_RLTQA.280.67	>19_TAG_RMVSA.159.67	>20_TAC_QRVSA.218.67	>21_TAC_ERVSV.300.67	>22_TAA_RITAA.265.67	>23_GTT_GTRAY.325.67	>24_GTG_HLIQY.118.67	>25_GTA_YTRQV.289.67	>26_GGT_ALKNM.185.67	>27_GGT_LTKDQ.637.67	>28_GGG_RSKER.905.67	>29_GGC_TLKNQ.543.67	>30_GGA_LAKDQ.437.67	>31_GCT_KITKF.202.67	>32_GCC_VRLKY.134.67	>33_GCA_ALRQQ.134.67	>34_GAT_RTMRY.157.67	>35_GAG_VMRWY.157.67	>36_GAC_ATRRF.225.67	>37_GAA_RFQKF.125.67	>38_CTA_LHYAK.294.67	>39_CTA_IFNAK.306.67	>40_CGG_STRER.114.67	>41_CGC_RVMSR.188.67	>42_CGA_TFYAA.132.67	>43_CCT_MTNGK.355.67	>44_CCT_RGDSK.334.67	>45_CCG_RCYEK.438.67	>46_CCC_RLDSK.169.67	>47_CCA_KMTQK.825.67	>48_CCA_EHNAK.693.67	>49_CAT_LSQSR.328.67	>51_CAG_MSHWR.321.67	>52_CAC_LGMRR.359.67
	NNCCTAATTAAGNN	NNCTAATTAAGGNN	NNCGTATTAACANN	NNCTTTTAATTANN	NNCTAATTAATCNN	NNCCGATAATTANN	NNACCCATAATGNN	NNCCCATTAAGTNN	NNTCCATTAACANN	NNGCTCATTAACNN	NNTCCTTAATTANN	NNCGGATTAGAANN	NNCATCGCTATGNN	NNAGGGATTAACNN	NNCGTATTAGTTNN	NNCTAATTAATANN	NNTCCATTAATTNN	NNGCATTAGCGNN	NNCGCATTAAGTNN	NNCTTGTTAGTGNN	NNCTACTTAGTGNN	NNGACACTTAACNN	NNGGCTTAAGTANN	NNCCGCCTTAGTGNN	NNCCTCCTTAGANN	NNCCCCTCAAAANN	NNGCGCCTTATANN	NNGCTCCTTAATNN	NNGGCTTAAGANN	NNGCTCTAAGCCNN	NNTGGCTAAGTANN	NNCTCCTTAAGANN	NNCCTCTCCACTNN	NNCGTCTTGTGANN	NNGCTACTTAGTNN	NNGCTAGTTATCNN	NNACTCGTTATGNN	NNGTCCGTTAGGNN	NNAGTGCTTCACNN	NNCTCGTTAGTNN	NNGCAGGTTATGNN	NNGCGGGTTATCNN	NNTCCAGTTAAGNN	NNTTTACGTCTCNN	NNCCGGTTAAGGNN	NNGGTAGTTAACNN	NNGTGGTTAACANN	NNATCCTGTTAGNN	NNGTGTGTCAGANN
	>1_TTT_RTVAA.163.68	>2_TTT_RTVSA.177.68	>4_TTC_VRVSA.160.68	>5_TTC_TRVAA.262.68	>6_TTA_VRVAA.428.68	>7_TTA_RVLRA.385.68	>8_TGT_RVVSQ.310.68	>9_TGG_KTTQD.410.68	>10_TGG_KSVMQ.265.68	>11_TGA_KSVAQ.365.68	>12_TGA_RGVAA.353.68	>13_TCT_ATVKA.451.68	>14_TCG_KGTQM.179.68	>15_TCC_RMIKS.231.68	>17_TAT_TRVSA.147.68	>18_TAG_RLTQA.276.68	>19_TAG_RMVSA.159.68	>20_TAC_QRVSA.215.68	>21_TAC_ERVSV.293.68	>22_TAA_RITAA.263.68	>23_GTT_GTRAY.323.68	>24_GTG_HLIQY.117.68	>25_GTA_YTRQV.287.68	>26_GGT_ALKNM.182.68	>27_GGT_LTKDQ.629.68	>28_GGG_RSKER.898.68	>29_GGC_TLKNQ.535.68	>30_GGA_LAKDQ.431.68	>31_GCT_KITKF.200.68	>32_GCC_VRLKY.131.68	>33_GCA_ALRQQ.133.68	>34_GAT_RTMRY.157.68	>35_GAG_VMRWY.156.68	>36_GAC_ATRRF.225.68	>37_GAA_RFQKF.122.68	>38_CTA_LHYAK.289.68	>39_CTA_IFNAK.297.68	>40_CGG_STRER.109.68	>41_CGC_RVMSR.188.68	>42_CGA_TFYAA.128.68	>43_CCT_MTNGK.354.68	>44_CCT_RGDSK.333.68	>45_CCG_RCYEK.424.68	>46_CCC_RLDSK.167.68	>47_CCA_KMTQK.821.68	>48_CCA_EHNAK.680.68	>49_CAT_LSQSR.327.68	>51_CAG_MSHWR.321.68	>52_CAC_LGMRR.341.68
	NNCTAATTAATCNN	NNCATATTAGTGNN	NNCGAATTAGCGNN	NNGTACTAATTANN	NNCCTAATTATGNN	NNCTAATTACANN	NNGGTACTAATGNN	NNACCCATTATCNN	NNCTCATTATAGNN	NNCTAATTAAGTNN	NNCTAATTAATTNN	NNCTCTTAATCCNN	NNGGTAAAGCATNN	NNAGGATTAGGANN	NNCGTATTATAGNN	NNCCAATTAACNN	NNCTAATTAGCGNN	NNGCGTATTACANN	NNACGCATTAGTNN	NNGTGTTAATTANN	NNTAGCTAAGTANN	NNATTCTAAGTGNN	NNCTGCTAAGTANN	NNGCGCCTTAAAANN	NNCTCCTTAATGNN	NNATGTTAAGGGNN	NNCGCCTTAACGNN	NNCCTCCTTAGGNN	NNCTTCTTAGCGNN	NNGGTCTAAGCCNN	NNTACATAAGTANN	NNCGTCTTATGGNN	NNCCTCTTACTANN	NNCGTCTCAACNN	NNGCTACTTACANN	NNCCTAGTTATANN	NNAGTAGTTAACNN	NNGACCGTTAACNN	NNGCATGTTAAANN	NNCTCGTTAACTNN	NNAATGGTTAACNN	NNACGGGTTAATNN	NNCTGGTTAATTNN	NNGCGGGTTATCNN	NNACTGGTTAGTNN	NNTCTGGTTATANN	NNAACGTTAACANN	NNCTGTTAGATNN	NNATGTGTCAACNN
	>1_TTT_RTVAA.161.69	>2_TTT_RTVSA.173.69	>4_TTC_VRVSA.156.69	>5_TTC_TRVAA.261.69	>6_TTA_VRVAA.427.69	>7_TTA_RVLRA.385.69	>8_TGT_RVVSQ.308.69	>9_TGG_KTTQD.409.69	>10_TGG_KSVMQ.265.69	>11_TGA_KSVAQ.360.69	>12_TGA_RGVAA.347.69	>13_TCT_ATVKA.436.69	>14_TCG_KGTQM.171.69	>15_TCC_RMIKS.230.69	>17_TAT_TRVSA.145.69	>18_TAG_RLTQA.273.69	>19_TAG_RMVSA.149.69	>20_TAC_QRVSA.215.69	>21_TAC_ERVSV.292.69	>22_TAA_RITAA.259.69	>23_GTT_GTRAY.321.69	>24_GTG_HLIQY.113.69	>25_GTA_YTRQV.283.69	>26_GGT_ALKNM.181.69	>27_GGT_LTKDQ.624.69	>28_GGG_RSKER.896.69	>29_GGC_TLKNQ.533.69	>30_GGA_LAKDQ.417.69	>31_GCT_KITKF.191.69	>32_GCC_VRLKY.129.69	>33_GCA_ALRQQ.133.69	>34_GAT_RTMRY.155.69	>35_GAG_VMRWY.156.69	>36_GAC_ATRRF.224.69	>37_GAA_RFQKF.122.69	>38_CTA_LHYAK.289.69	>39_CTA_IFNAK.279.69	>40_CGG_STRER.109.69	>41_CGC_RVMSR.187.69	>42_CGA_TFYAA.128.69	>43_CCT_MTNGK.345.69	>44_CCT_RGDSK.331.69	>45_CCG_RCYEK.423.69	>46_CCC_RLDSK.162.69	>47_CCA_KMTQK.816.69	>48_CCA_EHNAK.675.69	>49_CAT_LSQSR.325.69	>51_CAG_MSHWR.318.69	>52_CAC_LGMRR.340.69
	NNGCTAATTATCNN	NNTCATTAATGNN	NNCTTGTTAATANN	NNCTAATTAAGANN	NNCTAATTAGCCNN	NNTGATTAATTANN	NNATCCTTAATGNN	NNGGTAAAGCATNN	NNGCTAATTAATNN	NNCTTCATTAAGNN	NNTAATTAAGTNN	NNATACTAATCCNN	NNCTTATTATTANN	NNCGGATTAGCGNN	NNCTAATTAACANN	NNCCTATTAAGANN	NNCGTGTTAATTNN	NNCATATTAACANN	NNCCGCATTAAANN	NNCTAATTAGACNN	NNCTCATAAGTANN	NNCCACTTAGATNN	NNTACTTAAGTANN	NNCGCCTTAGCGNN	NNTTCCTTAACCNN	NNCCCCCTCAAGNN	NNCGCCTTAGCNN	NNTTCCTTAAGNN	NNCATCTTAAGCNN	NNTGCTTAAGAANN	NNCGTCTAAGTANN	NNCCGTCTAAACNN	NNCCTCTTATGCNN	NNCGTCTTACCANN	NNCTACTTAGTANN	NNGATGGTTAAANN	NNGGTAGTTAACNN	NNCCCGTTAAACNN	NNCGTGTTAAAGNN	NNTCTCGTTAATNN	NNGCTGGTTAAGNN	NNCCGGGTTAACNN	NNCCCGGTTAAANN	NNTCGGGTTATCNN	NNTCCCTAACTANN	NNACTAGTTACANN	NNCCATGTTACANN	NNGCCTGTCTAANN	NNGCGTGTTAGTNN
	>1_TTT_RTVAA.160.70	>2_TTT_RTVSA.161.70	>4_TTC_VRVSA.154.70	>5_TTC_TRVAA.254.70	>6_TTA_VRVAA.419.70	>7_TTA_RVLRA.385.70	>8_TGT_RVVSQ.306.70	>9_TGG_KTTQD.406.70	>10_TGG_KSVMQ.258.70	>11_TGA_KSVAQ.359.70	>12_TGA_RGVAA.342.70	>13_TCT_ATVKA.435.70	>14_TCG_KGTQM.171.70	>15_TCC_RMIKS.228.70	>17_TAT_TRVSA.144.70	>18_TAG_RLTQA.266.70	>19_TAG_RMVSA.149.70	>20_TAC_QRVSA.215.70	>21_TAC_ERVSV.291.70	>22_TAA_RITAA.256.70	>23_GTT_GTRAY.320.70	>24_GTG_HLIQY.113.70	>25_GTA_YTRQV.282.70	>26_GGT_ALKNM.179.70	>27_GGT_LTKDQ.618.70	>28_GGG_RSKER.877.70	>29_GGC_TLKNQ.526.70	>30_GGA_LAKDQ.416.70	>31_GCT_KITKF.190.70	>32_GCC_VRLKY.128.70	>33_GCA_ALRQQ.132.70	>34_GAT_RTMRY.154.70	>35_GAG_VMRWY.151.70	>36_GAC_ATRRF.223.70	>37_GAA_RFQKF.120.70	>38_CTA_LHYAK.283.70	>39_CTA_IFNAK.274.70	>40_CGG_STRER.108.70	>41_CGC_RVMSR.187.70	>42_CGA_TFYAA.114.70	>43_CCT_MTNGK.339.70	>44_CCT_RGDSK.331.70	>45_CCG_RCYEK.413.70	>46_CCC_RLDSK.162.70	>47_CCA_KMTQK.793.70	>48_CCA_EHNAK.669.70	>49_CAT_LSQSR.318.70	>51_CAG_MSHWR.289.70	>52_CAC_LGMRR.333.70
	NNCCTCATTAATNN	NNTTCGTTAATANN	NNCGTATTAGTANN	NNATTTTAATTANN	NNGTGTTAATTANN	NNCTATTAATTANN	NNTGCGCTAATGNN	NNTCCCATTATANN	NNCACATTAAGGNN	NNCTCATTAATNN	NNGCCCATTAACNN	NNGCGGATTAAANN	NNCCATTATCANN	NNACGGATTAAANN	NNCGTATTAGGGNN	NNCTAATTAGAGNN	NNCATGTTAATGNN	NNTGTATCAACTNN	NNGCATTAGCGNN	NNCTCATTAAAGNN	NNCCCATAAGTANN	NNCCACTTACANN	NNGCACTAAGTANN	NNGCCTTAGTANN	NNCTCCTTAGCTNN	NNCCCCTTACGTNN	NNCGCCTTAACTNN	NNTTCCTTAGAGNN	NNCGTCTTAGGCNN	NNGCCCTAAGCCNN	NNCTACTTAGTGNN	NNCTTCTTAATANN	NNCCTCTCAATANN	NNCGTCTCAGCGNN	NNGCTACTTACTNN	NNCTAGTTAGCCNN	NNGCTAGTTAATNN	NNTCCGTTAGAANN	NNAGACTTAACANN	NNTCGTTATGCNN	NNATTGGTTAAGNN	NNATTCCGCTCTNN	NNTATACACGAANN	NNCGGGTTAGACNN	NNATCTTAACCANN	NNGATGGTTACANN	NNCATGTTAACGNN	NNCCTGTCAATGNN	NNCCGTGTTAGGNN
	>1_TTT_RTVAA.159.71	>2_TTT_RTVSA.160.71	>4_TTC_VRVSA.151.71	>5_TTC_TRVAA.251.71	>6_TTA_VRVAA.414.71	>7_TTA_RVLRA.382.71	>8_TGT_RVVSQ.295.71	>9_TGG_KTTQD.393.71	>10_TGG_KSVMQ.243.71	>11_TGA_KSVAQ.342.71	>12_TGA_RGVAA.338.71	>13_TCT_ATVKA.432.71	>14_TCG_KGTQM.169.71	>15_TCC_RMIKS.224.71	>17_TAT_TRVSA.142.71	>18_TAG_RLTQA.259.71	>19_TAG_RMVSA.144.71	>20_TAC_QRVSA.214.71	>21_TAC_ERVSV.288.71	>22_TAA_RITAA.252.71	>23_GTT_GTRAY.320.71	>24_GTG_HLIQY.112.71	>25_GTA_YTRQV.279.71	>26_GGT_ALKNM.173.71	>27_GGT_LTKDQ.587.71	>28_GGG_RSKER.852.71	>29_GGC_TLKNQ.525.71	>30_GGA_LAKDQ.416.71	>31_GCT_KITKF.190.71	>32_GCC_VRLKY.126.71	>33_GCA_ALRQQ.132.71	>34_GAT_RTMRY.153.71	>35_GAG_VMRWY.150.71	>36_GAC_ATRRF.219.71	>37_GAA_RFQKF.118.71	>38_CTA_LHYAK.280.71	>39_CTA_IFNAK.263.71	>40_CGG_STRER.107.71	>41_CGC_RVMSR.185.71	>42_CGA_TFYAA.112.71	>43_CCT_MTNGK.339.71	>44_CCT_RGDSK.312.71	>45_CCG_RCYEK.411.71	>46_CCC_RLDSK.159.71	>47_CCA_KMTQK.753.71	>48_CCA_EHNAK.660.71	>49_CAT_LSQSR.317.71	>51_CAG_MSHWR.284.71	>52_CAC_LGMRR.330.71
	NNCAAATTAATTNN	NNAGCCTTAATANN	NNGTTAATTAAANN	NNTACCTAATTANN	NNCCTCATTAATNN	NNGCTAATTATANN	NNAGTGTTAATGNN	NNCCCATTAAAANN	NNGCCATTAGTGNN	NNCCTCATTAACNN	NNTAATTAGAGNN	NNAGGATTAATGNN	NNTCAATTAAGANN	NNGCGGATTAAANN	NNCGTGTTAATGNN	NNGCCAATTAGTNN	NNATCGTAGATTNN	NNGCGCATTAACNN	NNCGTATTATCGNN	NNGCTAATTATGNN	NNACGTTAAGTANN	NNCCACTTAATGNN	NNACTTTAAGTANN	NNGCGCCTTCTANN	NNTTCCTTAAGCNN	NNCCCCTCAAGGNN	NNCGCCTTAGACNN	NNCTCCTTAAANN	NNGTCTTAGAGNN	NNCGTCTTAACNN	NNGTCGTAAGTANN	NNCCGTCTTAACNN	NNCCTCTTATCANN	NNCGTCTCAGTANN	NNGGTTCTTATTNN	NNGATAGTTAAANN	NNGATAGTTAAANN	NNACCCGTTAGTNN	NNCATGTTAGTGNN	NNCTCGTTATCNN	NNGATGGTTAGTNN	NNACGGGTTACANN	NNTTGGTTAGGANN	NNCCGGGTTAAGNN	NNAACTTAACCANN	NNACTGGTTAAGNN	NNTTGCTTAACANN	NNCTGTTTGCANN	NNGCGTGTCATANN
	>1_TTT_RTVAA.158.72	>2_TTT_RTVSA.155.72	>4_TTC_VRVSA.150.72	>5_TTC_TRVAA.245.72	>6_TTA_VRVAA.414.72	>7_TTA_RVLRA.382.72	>8_TGT_RVVSQ.293.72	>9_TGG_KTTQD.386.72	>10_TGG_KSVMQ.241.72	>11_TGA_KSVAQ.336.72	>12_TGA_RGVAA.336.72	>13_TCT_ATVKA.425.72	>14_TCG_KGTQM.168.72	>15_TCC_RMIKS.224.72	>17_TAT_TRVSA.140.72	>18_TAG_RLTQA.258.72	>19_TAG_RMVSA.144.72	>20_TAC_QRVSA.206.72	>21_TAC_ERVSV.283.72	>22_TAA_RITAA.248.72	>23_GTT_GTRAY.317.72	>24_GTG_HLIQY.110.72	>25_GTA_YTRQV.275.72	>26_GGT_ALKNM.163.72	>27_GGT_LTKDQ.577.72	>28_GGG_RSKER.822.72	>29_GGC_TLKNQ.507.72	>30_GGA_LAKDQ.413.72	>31_GCT_KITKF.185.72	>32_GCC_VRLKY.125.72	>33_GCA_ALRQQ.131.72	>34_GAT_RTMRY.152.72	>35_GAG_VMRWY.150.72	>36_GAC_ATRRF.218.72	>37_GAA_RFQKF.116.72	>38_CTA_LHYAK.278.72	>39_CTA_IFNAK.248.72	>40_CGG_STRER.106.72	>41_CGC_RVMSR.177.72	>42_CGA_TFYAA.112.72	>43_CCT_MTNGK.338.72	>44_CCT_RGDSK.304.72	>45_CCG_RCYEK.405.72	>46_CCC_RLDSK.154.72	>47_CCA_KMTQK.751.72	>48_CCA_EHNAK.657.72	>49_CAT_LSQSR.315.72	>51_CAG_MSHWR.263.72	>52_CAC_LGMRR.330.72
	NNCTCATTAAGANN	NNTTCCTTAATANN	NNTGCATTAAGANN	NNTTGCTAATTANN	NNTGCGCATCGANN	NNGCCTTAATTANN	NNGCACATTAAANN	NNCCCCATTATANN	NNCCCATTAGAGNN	NNTTCATTAGAANN	NNCTCATTAACANN	NNGAATTAATCCNN	NNGCCCATTAAGNN	NNGAGGATTAATNN	NNGTGTTATGTTNN	NNCCAATTAACTNN	NNCATATTAACANN	NNCGTATTACCANN	NNCGCATTATCNN	NNCTCATTAGGGNN	NNCTACTTAACTNN	NNCACTTAAGTGNN	NNGCTTTAAGTANN	NNCGCCTTAACNN	NNCTCCTTACTANN	NNCCCCTCAATANN	NNATGCTATCTTNN	NNTTCCTTATGANN	NNCGTCTTACTANN	NNGATTTAAGCCNN	NNTGTTTAAGTANN	NNCATCTTAGTGNN	NNCCTCTCAATNN	NNCGTCTTGTAGNN	NNCTTCTTAGTANN	NNGCTAGTTAATNN	NNCTCGTTAGTGNN	NNGCACGCTGTANN	NNTAACTTAACANN	NNTCGTTAACTNN	NNCCTGGTTATTNN	NNCGGGTTAGAGNN	NNCTGGTTATGANN	NNGCGGGTTACCNN	NNATACTAACCANN	NNACTAGTTATCNN	NNCATGTTAAAANN	NNCCTGTTAGATNN	NNGTGTGTCAATNN
	>1_TTT_RTVAA.156.73	>2_TTT_RTVSA.153.73	>4_TTC_VRVSA.148.73	>5_TTC_TRVAA.241.73	>6_TTA_VRVAA.410.73	>7_TTA_RVLRA.381.73	>8_TGT_RVVSQ.293.73	>9_TGG_KTTQD.382.73	>10_TGG_KSVMQ.228.73	>11_TGA_KSVAQ.335.73	>12_TGA_RGVAA.328.73	>13_TCT_ATVKA.422.73	>14_TCG_KGTQM.167.73	>15_TCC_RMIKS.220.73	>17_TAT_TRVSA.138.73	>18_TAG_RLTQA.256.73	>19_TAG_RMVSA.142.73	>20_TAC_QRVSA.201.73	>21_TAC_ERVSV.281.73	>22_TAA_RITAA.236.73	>23_GTT_GTRAY.312.73	>24_GTG_HLIQY.109.73	>25_GTA_YTRQV.273.73	>26_GGT_ALKNM.152.73	>27_GGT_LTKDQ.574.73	>28_GGG_RSKER.802.73	>29_GGC_TLKNQ.506.73	>30_GGA_LAKDQ.410.73	>31_GCT_KITKF.173.73	>32_GCC_VRLKY.124.73	>33_GCA_ALRQQ.130.73	>34_GAT_RTMRY.146.73	>35_GAG_VMRWY.149.73	>36_GAC_ATRRF.213.73	>37_GAA_RFQKF.115.73	>38_CTA_LHYAK.271.73	>39_CTA_IFNAK.240.73	>40_CGG_STRER.104.73	>41_CGC_RVMSR.177.73	>42_CGA_TFYAA.110.73	>43_CCT_MTNGK.337.73	>44_CCT_RGDSK.303.73	>45_CCG_RCYEK.396.73	>46_CCC_RLDSK.153.73	>47_CCA_KMTQK.750.73	>48_CCA_EHNAK.633.73	>49_CAT_LSQSR.315.73	>51_CAG_MSHWR.261.73	>52_CAC_LGMRR.328.73
	NNATCACTAATTNN	NNATCGTAGATTNN	NNCGTATTAGGANN	NNGGTTTAATTANN	NNCTGTGTCGTANN	NNGGGTTAATTANN	NNTCAACTAATGNN	NNCCATTAAGANN	NNCCCATTATGGNN	NNCTCATTATTCNN	NNGCTCATTAAGNN	NNCGGATAATCCNN	NNTCCCATTAAANN	NNAGGATTAGCGNN	NNCTCATTAGTGNN	NNTCAATTAGTANN	NNTCATTAATGNN	NNCGCATTAAGNN	NNCGCATTAAACNN	NNCTAATTAATNN	NNATGTTAAGTANN	NNGGTTTAAGTGNN	NNTTGCTAAGTANN	NNGCACCTTATCNN	NNTCTCCTTAAGNN	NNCCCCTTAGACNN	NNCCGCCTTAATNN	NNCTCCTTAGTNN	NNCTTCTTAATGNN	NNTGTTTAAGCCNN	NNTATATAAGTANN	NNTGTCTTAACANN	NNACCTCTTTAANN	NNCGTCTTATTANN	NNGCTTCTTTAANN	NNCTAGTTATTGNN	NNCCTAGTTATGNN	NNGTCCGTTAGANN	NNCCGTGTTAATNN	NNGCTCGTTAGGNN	NNGGAGGTTAAANN	NNCGGGTTAGACNN	NNCTGGTTACAGNN	NNCGGGTTAAACNN	NNGATGGTTATCNN	NNAATGGTTAAANN	NNTTTGCTAACANN	NNCCTGTTACANN	NNGTGTGTCATCNN
	>1_TTT_RTVAA.155.74	>2_TTT_RTVSA.151.74	>4_TTC_VRVSA.148.74	>5_TTC_TRVAA.240.74	>6_TTA_VRVAA.407.74	>7_TTA_RVLRA.376.74	>8_TGT_RVVSQ.292.74	>9_TGG_KTTQD.378.74	>10_TGG_KSVMQ.226.74	>11_TGA_KSVAQ.331.74	>12_TGA_RGVAA.325.74	>13_TCT_ATVKA.418.74	>14_TCG_KGTQM.163.74	>15_TCC_RMIKS.218.74	>17_TAT_TRVSA.138.74	>18_TAG_RLTQA.256.74	>19_TAG_RMVSA.137.74	>20_TAC_QRVSA.200.74	>21_TAC_ERVSV.279.74	>22_TAA_RITAA.234.74	>23_GTT_GTRAY.309.74	>24_GTG_HLIQY.108.74	>25_GTA_YTRQV.269.74	>26_GGT_ALKNM.136.74	>27_GGT_LTKDQ.563.74	>28_GGG_RSKER.799.74	>29_GGC_TLKNQ.506.74	>30_GGA_LAKDQ.405.74	>31_GCT_KITKF.173.74	>32_GCC_VRLKY.124.74	>33_GCA_ALRQQ.130.74	>34_GAT_RTMRY.142.74	>35_GAG_VMRWY.147.74	>36_GAC_ATRRF.212.74	>37_GAA_RFQKF.113.74	>38_CTA_LHYAK.257.74	>39_CTA_IFNAK.240.74	>40_CGG_STRER.104.74	>41_CGC_RVMSR.176.74	>42_CGA_TFYAA.110.74	>43_CCT_MTNGK.336.74	>44_CCT_RGDSK.297.74	>45_CCG_RCYEK.394.74	>46_CCC_RLDSK.152.74	>47_CCA_KMTQK.743.74	>48_CCA_EHNAK.621.74	>49_CAT_LSQSR.314.74	>51_CAG_MSHWR.260.74	>52_CAC_LGMRR.328.74
	NNTAATTAGAGNN	NNCTTATTAATGNN	NNCTAATTATGANN	NNTGACTAATTANN	NNCGTATTTATGNN	NNCGATAATTANN	NNTCTGTTAATGNN	NNACCCATTATTNN	NNACATTAACANN	NNCTCATTATGNN	NNTTAATTAAGGNN	NNCCGGATTACANN	NNCCCATTAACTNN	NNCTCTTAATCCNN	NNCGTATTAGGANN	NNGCCAATTAATNN	NNTGCATTAATANN	NNCACATTAATANN	NNCGTATTACTGNN	NNGCTCATTAAGNN	NNGATCTAAGTANN	NNCCTTTAAGTGNN	NNAGTTAAGTANN	NNACACCTTAAGNN	NNTATCCTTTAGNN	NNCCCCTTAAAANN	NNGCGCCTTTTANN	NNTTCCTTACGANN	NNCGTCTTAAGCCNN	NNTGTCTTAGTANN	NNGACCTAAGTANN	NNCTTCTTAGCANN	NNCCTCTCAGAGNN	NNCGTCTTGGACNN	NNGGTTCTCAAGNN	NNCCTAGTTAAGANN	NNCCTAGTTATANN	NNTCCGTTAGGANN	NNGCCGTTAACANN	NNCCTCGTTATTNN	NNCAGGTTAACCNN	NNGCGGGTTAGGNN	NNGCCAGTTAATNN	NNGCTGGTTAGANN	NNTGGTTAACCANN	NNACCTTAACCANN	NNCTCGCTAACANN	NNTGTCAACAAANN	NNTTGTGTCAAANN
	>1_TTT_RTVAA.152.75	>2_TTT_RTVSA.147.75	>4_TTC_VRVSA.146.75	>5_TTC_TRVAA.239.75	>6_TTA_VRVAA.395.75	>7_TTA_RVLRA.375.75	>8_TGT_RVVSQ.286.75	>9_TGG_KTTQD.365.75	>10_TGG_KSVMQ.219.75	>11_TGA_KSVAQ.330.75	>12_TGA_RGVAA.323.75	>13_TCT_ATVKA.414.75	>14_TCG_KGTQM.158.75	>15_TCC_RMIKS.216.75	>17_TAT_TRVSA.134.75	>18_TAG_RLTQA.255.75	>19_TAG_RMVSA.136.75	>20_TAC_QRVSA.200.75	>21_TAC_ERVSV.268.75	>22_TAA_RITAA.232.75	>23_GTT_GTRAY.307.75	>24_GTG_HLIQY.108.75	>25_GTA_YTRQV.267.75	>26_GGT_ALKNM.135.75	>27_GGT_LTKDQ.552.75	>28_GGG_RSKER.792.75	>29_GGC_TLKNQ.488.75	>30_GGA_LAKDQ.403.75	>31_GCT_KITKF.168.75	>32_GCC_VRLKY.123.75	>33_GCA_ALRQQ.127.75	>34_GAT_RTMRY.142.75	>35_GAG_VMRWY.145.75	>36_GAC_ATRRF.211.75	>37_GAA_RFQKF.108.75	>38_CTA_LHYAK.256.75	>39_CTA_IFNAK.227.75	>40_CGG_STRER.98.75	>41_CGC_RVMSR.176.75	>42_CGA_TFYAA.105.75	>43_CCT_MTNGK.336.75	>44_CCT_RGDSK.293.75	>45_CCG_RCYEK.393.75	>46_CCC_RLDSK.149.75	>47_CCA_KMTQK.730.75	>48_CCA_EHNAK.620.75	>49_CAT_LSQSR.313.75	>51_CAG_MSHWR.260.75	>52_CAC_LGMRR.320.75
	NNCTCATTAGAANN	NNAATGCTAATGNN	NNCTAATTAAGGNN	NNCTCATTAATANN	NNCCTAATTAGCNN	NNTCATTAGTGNN	NNCACATTAGCANN	NNCCCATTATANN	NNTTCATTAAGGNN	NNGTTCATTAAGNN	NNTCATTAAAGNN	NNACCCTAATCCNN	NNCCCATTAATCNN	NNGGATTAGTGNN	NNCGTATTACAANN	NNCTCATTAGTANN	NNTGTGCTAATTNN	NNGCGTATTACGNN	NNCGCATTACANN	NNCTCATTAAAANN	NNCTACTTACAANN	NNCCACTTAATNN	NNCTACTTAGCGNN	NNCGCCTTAGAANN	NNCTCCTTATCNN	NNTCCCTTAGTANN	NNCGCCTTAAATNN	NNCTCCTAAGGANN	NNCTTCTTAGTANN	NNGGATTAAGCCNN	NNCTACTTAGCANN	NNGTCCTTAAGANN	NNCCTCTTGAAANN	NNCGTCTTACANN	NNCTTCTTAAGANN	NNGCTAGTTAGTGNN	NNGGTAGTTATGNN	NNCCGTTAATTNN	NNTCTGTTAACANN	NNACTAGTTAACNN	NNGCATTTAACCNN	NNCGGGTTAATGNN	NNTCGGTTAAACNN	NNGTCCAGATGGNN	NNAGCCTAACCANN	NNACTAGTTAATNN	NNCCACTTAACANN	NNTCCTGTTAAANN	NNGTGTGTAATANN
	>1_TTT_RTVAA.148.76	>2_TTT_RTVSA.144.76	>4_TTC_VRVSA.146.76	>5_TTC_TRVAA.236.76	>6_TTA_VRVAA.390.76	>7_TTA_RVLRA.372.76	>8_TGT_RVVSQ.286.76	>9_TGG_KTTQD.364.76	>10_TGG_KSVMQ.219.76	>11_TGA_KSVAQ.328.76	>12_TGA_RGVAA.310.76	>13_TCT_ATVKA.413.76	>14_TCG_KGTQM.158.76	>15_TCC_RMIKS.215.76	>17_TAT_TRVSA.134.76	>18_TAG_RLTQA.255.76	>19_TAG_RMVSA.136.76	>20_TAC_QRVSA.199.76	>21_TAC_ERVSV.266.76	>22_TAA_RITAA.224.76	>23_GTT_GTRAY.304.76	>24_GTG_HLIQY.106.76	>25_GTA_YTRQV.266.76	>26_GGT_ALKNM.131.76	>27_GGT_LTKDQ.539.76	>28_GGG_RSKER.791.76	>29_GGC_TLKNQ.475.76	>30_GGA_LAKDQ.399.76	>31_GCT_KITKF.167.76	>32_GCC_VRLKY.122.76	>33_GCA_ALRQQ.126.76	>34_GAT_RTMRY.141.76	>35_GAG_VMRWY.140.76	>36_GAC_ATRRF.210.76	>37_GAA_RFQKF.105.76	>38_CTA_LHYAK.246.76	>39_CTA_IFNAK.226.76	>40_CGG_STRER.97.76	>41_CGC_RVMSR.175.76	>42_CGA_TFYAA.101.76	>43_CCT_MTNGK.330.76	>44_CCT_RGDSK.284.76	>45_CCG_RCYEK.390.76	>46_CCC_RLDSK.147.76	>47_CCA_KMTQK.726.76	>48_CCA_EHNAK.611.76	>49_CAT_LSQSR.311.76	>51_CAG_MSHWR.253.76	>52_CAC_LGMRR.317.76
	NNATGCTATCTTNN	NNTTCATTAATGNN	NNGCGTATTAGCNN	NNATATTAATTANN	NNTCATTAGTGNN	NNCTCATTAGTANN	NNAATGTTAATGNN	NNATCCATTAAGNN	NNTTCATTAATANN	NNCTCATTATGTNN	NNCTAATTAATCNN	NNGGACTAATCCNN	NNCAATTAGCANN	NNCGGATTAGTTNN	NNCATATTAAGANN	NNCCAATTAAANN	NNCTAATTAGTANN	NNCTAATTAAGGNN	NNGCGTATCAAANN	NNCTTGTTAATTNN	NNCTACTTAATCNN	NNGATTTAAGTGNN	NNCTACTCAGGANN	NNTACCTTTGGANN	NNCTCCTTAGAANN	NNATCCCTTAAGNN	NNGCCTTAGTGNN	NNCTCCTTAACNN	NNCGGCTTATCANN	NNGGGTTAAGCCNN	NNCTACTTAAGGNN	NNCGTCTTAGGGNN	NNCCTCTTAAGANN	NNCGTCTCAGCNN	NNCTACTTAAGANN	NNACTAGTTACANN	NNGCTCGTTAGCNN	NNCCCCGTTAGANN	NNCATGTTTCGGNN	NNCTCGTTAAAANN	NNGTTAGTTATCNN	NNGTGGGTTAACNN	NNGTCGGTTAGTNN	NNACGGGTTAGCNN	NNGGGCTAACCANN	NNACTGGTTAAANN	NNGCACTTAACANN	NNCCTGTTACTANN	NNGTGTGTAAAANN
	>1_TTT_RTVAA.147.77	>2_TTT_RTVSA.144.77	>4_TTC_VRVSA.143.77	>5_TTC_TRVAA.234.77	>6_TTA_VRVAA.384.77	>7_TTA_RVLRA.371.77	>8_TGT_RVVSQ.282.77	>9_TGG_KTTQD.363.77	>10_TGG_KSVMQ.217.77	>11_TGA_KSVAQ.326.77	>12_TGA_RGVAA.309.77	>13_TCT_ATVKA.409.77	>14_TCG_KGTQM.158.77	>15_TCC_RMIKS.207.77	>17_TAT_TRVSA.122.77	>18_TAG_RLTQA.251.77	>19_TAG_RMVSA.136.77	>20_TAC_QRVSA.194.77	>21_TAC_ERVSV.265.77	>22_TAA_RITAA.222.77	>23_GTT_GTRAY.303.77	>24_GTG_HLIQY.106.77	>25_GTA_YTRQV.255.77	>26_GGT_ALKNM.130.77	>27_GGT_LTKDQ.533.77	>28_GGG_RSKER.788.77	>29_GGC_TLKNQ.471.77	>30_GGA_LAKDQ.398.77	>31_GCT_KITKF.164.77	>32_GCC_VRLKY.122.77	>33_GCA_ALRQQ.125.77	>34_GAT_RTMRY.140.77	>35_GAG_VMRWY.138.77	>36_GAC_ATRRF.202.77	>37_GAA_RFQKF.100.77	>38_CTA_LHYAK.238.77	>39_CTA_IFNAK.215.77	>40_CGG_STRER.96.77	>41_CGC_RVMSR.173.77	>42_CGA_TFYAA.100.77	>43_CCT_MTNGK.329.77	>44_CCT_RGDSK.283.77	>45_CCG_RCYEK.384.77	>46_CCC_RLDSK.145.77	>47_CCA_KMTQK.719.77	>48_CCA_EHNAK.609.77	>49_CAT_LSQSR.310.77	>51_CAG_MSHWR.252.77	>52_CAC_LGMRR.311.77
	NNTCCTTAATTANN	NNTTCGCTAATANN	NNCTCATTAGTANN	NNTCTTTAATTANN	NNCCTCATTATGNN	NNCGATTAATTANN	NNTACCTTAATGNN	NNCCCCATTAAANN	NNTGCATTAAGGNN	NNTTCATTAGCGNN	NNTCACTAATTANN	NNCGGATTATTGNN	NNCCATTAGAGNN	NNTGGATTAGAGNN	NNCGCATTATTANN	NNCTTGTTAACANN	NNTATATTAATANN	NNCGCATTATTANN	NNACGTATTAATNN	NNCTCATTAGAGNN	NNGCTTTAAGTANN	NNTTTTTAAGTGNN	NNGTTATAAGTANN	NNCCGCCTTATGNN	NNCCTCCTTAGGNN	NNTCCCTTAACANN	NNCGCCTTAAAANN	NNTTCCTTAAGCNN	NNGAGCTTAAGCNN	NNCGTCTTAGGCNN	NNGTACTAAGTANN	NNGTCTTAGAGNN	NNCCTCTCAAANN	NNCGTCTTGAGGNN	NNAGTTCTTAATNN	NNAGTGGTTATANN	NNGGTAGTTAGTNN	NNCCCGTTAACCNN	NNACGCGTTAAGNN	NNTCGTTAACCNN	NNGTAGGTTATANN	NNTCTGGTTAACNN	NNACCGGTTAACNN	NNCCGGGTTAATNN	NNGAGTTAACCANN	NNCCTGGTTAAGNN	NNGATTTTAACANN	NNCTGTCAAGANN	NNCGTGTTAAGGNN
	>1_TTT_RTVAA.142.78	>2_TTT_RTVSA.143.78	>4_TTC_VRVSA.143.78	>5_TTC_TRVAA.229.78	>6_TTA_VRVAA.365.78	>7_TTA_RVLRA.370.78	>8_TGT_RVVSQ.276.78	>9_TGG_KTTQD.352.78	>10_TGG_KSVMQ.217.78	>11_TGA_KSVAQ.316.78	>12_TGA_RGVAA.308.78	>13_TCT_ATVKA.408.78	>14_TCG_KGTQM.153.78	>15_TCC_RMIKS.206.78	>17_TAT_TRVSA.121.78	>18_TAG_RLTQA.249.78	>19_TAG_RMVSA.134.78	>20_TAC_QRVSA.193.78	>21_TAC_ERVSV.264.78	>22_TAA_RITAA.220.78	>23_GTT_GTRAY.302.78	>24_GTG_HLIQY.105.78	>25_GTA_YTRQV.253.78	>26_GGT_ALKNM.129.78	>27_GGT_LTKDQ.518.78	>28_GGG_RSKER.775.78	>29_GGC_TLKNQ.470.78	>30_GGA_LAKDQ.383.78	>31_GCT_KITKF.163.78	>32_GCC_VRLKY.118.78	>33_GCA_ALRQQ.122.78	>34_GAT_RTMRY.137.78	>35_GAG_VMRWY.137.78	>36_GAC_ATRRF.201.78	>37_GAA_RFQKF.100.78	>38_CTA_LHYAK.237.78	>39_CTA_IFNAK.207.78	>40_CGG_STRER.95.78	>41_CGC_RVMSR.172.78	>42_CGA_TFYAA.98.78	>43_CCT_MTNGK.322.78	>44_CCT_RGDSK.278.78	>45_CCG_RCYEK.382.78	>46_CCC_RLDSK.140.78	>47_CCA_KMTQK.718.78	>48_CCA_EHNAK.604.78	>49_CAT_LSQSR.299.78	>51_CAG_MSHWR.251.78	>52_CAC_LGMRR.311.78
	NNTTCGCTAATTNN	NNCTCATTAATTNN	NNTGAATTAATGNN	NNCCTAATTATANN	NNCTCATTAGATNN	NNTTAATTAGTGNN	NNCCCTCTAATGNN	NNGTCCATTAGGNN	NNCTCATTAAAANN	NNTTCATTAAAGNN	NNAGCTTAATTANN	NNCGGATTATAANN	NNCCATTAATGNN	NNGCGGATTATGNN	NNCGCATTAATCNN	NNCTAATTAAGANN	NNCGAATTAGTANN	NNCGTATTATATNN	NNGCGCATTAGCANN	NNTCCTTAATTANN	NNCTGCTAAGTANN	NNCCCACTTATANN	NNCTACTTACCANN	NNTCACCTTAACNN	NNCTTCCTTAGTNN	NNTTCATAAGGGNN	NNACGCCTTAAANN	NNTTCCTTAGTTNN	NNGACTTAAGCCNN	NNTTCTTAAGACNN	NNCCTACTTAAGNN	NNCTTCTTAAGGNN	NNCCTCTCAGGGNN	NNCGTCTTACCGNN	NNCTACTTAGTGNN	NNCTAGTTAATCNN	NNTCTAGTTAATNN	NNACCCGTTATANN	NNCGTGTTAGAGNN	NNCTCGTTACGANN	NNCAGGTTAACGNN	NNTTCGTAACCANN	NNTCGGTTATGANN	NNGGGTTAATTNN	NNGCTAGTTAGCNN	NNATGCTATCTTNN	NNCCTGCTAACANN	NNCTGTTTAAANN	NNATGTGTTAGTNN
	>1_TTT_RTVAA.141.79	>2_TTT_RTVSA.140.79	>4_TTC_VRVSA.140.79	>5_TTC_TRVAA.224.79	>6_TTA_VRVAA.356.79	>7_TTA_RVLRA.364.79	>8_TGT_RVVSQ.275.79	>9_TGG_KTTQD.352.79	>10_TGG_KSVMQ.216.79	>11_TGA_KSVAQ.314.79	>12_TGA_RGVAA.302.79	>13_TCT_ATVKA.406.79	>14_TCG_KGTQM.153.79	>15_TCC_RMIKS.205.79	>17_TAT_TRVSA.119.79	>18_TAG_RLTQA.237.79	>19_TAG_RMVSA.132.79	>20_TAC_QRVSA.190.79	>21_TAC_ERVSV.252.79	>22_TAA_RITAA.219.79	>23_GTT_GTRAY.298.79	>24_GTG_HLIQY.104.79	>25_GTA_YTRQV.252.79	>26_GGT_ALKNM.129.79	>27_GGT_LTKDQ.499.79	>28_GGG_RSKER.751.79	>29_GGC_TLKNQ.469.79	>30_GGA_LAKDQ.379.79	>31_GCT_KITKF.163.79	>32_GCC_VRLKY.117.79	>33_GCA_ALRQQ.122.79	>34_GAT_RTMRY.136.79	>35_GAG_VMRWY.136.79	>36_GAC_ATRRF.197.79	>37_GAA_RFQKF.99.79	>38_CTA_LHYAK.235.79	>39_CTA_IFNAK.181.79	>40_CGG_STRER.94.79	>41_CGC_RVMSR.172.79	>42_CGA_TFYAA.96.79	>43_CCT_MTNGK.320.79	>44_CCT_RGDSK.265.79	>45_CCG_RCYEK.379.79	>46_CCC_RLDSK.135.79	>47_CCA_KMTQK.716.79	>48_CCA_EHNAK.603.79	>49_CAT_LSQSR.297.79	>51_CAG_MSHWR.246.79	>52_CAC_LGMRR.306.79
	NNGTCCTAATTANN	NNCTCATTAGCGNN	NNACGTATTGGTNN	NNCTAATTAGAGNN	NNCTAATTAAAGNN	NNTATTTAATTANN	NNGGTGTTAATGNN	NNCCCATTACGTNN	NNTTCATTAAGANN	NNCTCATTAACCNN	NNTCATTAGTANN	NNCGGATTAGGGNN	NNTCATTAGTANN	NNCGCTAATCCNN	NNTTTGCTAATGNN	NNACCAATTAACNN	NNACATTAATANN	NNCGTATTAATNN	NNCGCATTAGCCNN	NNCTTATTAATANN	NNGGTTTAAGTANN	NNAGCTTAAGTGNN	NNGCTACTTAAANN	NNCCACCTTAACNN	NNCCTCCTTAATANN	NNATTTTAAGGGNN	NNCGCCTTAGGCNN	NNCTCCTTAGACNN	NNCGGCTTAAGTNN	NNTGGCTTAGCANN	NNATATTAAGTANN	NNCTTGTTAAGANN	NNCCTCTTATGNN	NNCGTCTTACCCNN	NNCTTCTTAGCGNN	NNACTAGTTAATNN	NNCCTCGTTAGANN	NNACCCGTTAAANN	NNCGCGTTAGGCNN	NNTCCTGACAGTNN	NNCCTGGTTAGGNN	NNCGGGTTAGTTNN	NNTCGGTTAACTNN	NNGGGTTAGCGNN	NNGTTTTAACTANN	NNGGTAGTTATCNN	NNGAACTTAACANN	NNTCCTGTTAGCNN	NNCGTGTTAGAGNN
	>1_TTT_RTVAA.139.80	>2_TTT_RTVSA.140.80	>4_TTC_VRVSA.140.80	>5_TTC_TRVAA.222.80	>6_TTA_VRVAA.353.80	>7_TTA_RVLRA.361.80	>8_TGT_RVVSQ.273.80	>9_TGG_KTTQD.346.80	>10_TGG_KSVMQ.213.80	>11_TGA_KSVAQ.310.80	>12_TGA_RGVAA.294.80	>13_TCT_ATVKA.401.80	>14_TCG_KGTQM.151.80	>15_TCC_RMIKS.204.80	>17_TAT_TRVSA.118.80	>18_TAG_RLTQA.229.80	>19_TAG_RMVSA.131.80	>20_TAC_QRVSA.185.80	>21_TAC_ERVSV.249.80	>22_TAA_RITAA.215.80	>23_GTT_GTRAY.297.80	>24_GTG_HLIQY.104.80	>25_GTA_YTRQV.250.80	>26_GGT_ALKNM.125.80	>27_GGT_LTKDQ.494.80	>28_GGG_RSKER.735.80	>29_GGC_TLKNQ.465.80	>30_GGA_LAKDQ.373.80	>31_GCT_KITKF.163.80	>32_GCC_VRLKY.115.80	>33_GCA_ALRQQ.121.80	>34_GAT_RTMRY.134.80	>35_GAG_VMRWY.133.80	>36_GAC_ATRRF.197.80	>37_GAA_RFQKF.98.80	>38_CTA_LHYAK.232.80	>39_CTA_IFNAK.181.80	>40_CGG_STRER.92.80	>41_CGC_RVMSR.171.80	>42_CGA_TFYAA.95.80	>43_CCT_MTNGK.319.80	>44_CCT_RGDSK.251.80	>45_CCG_RCYEK.373.80	>46_CCC_RLDSK.133.80	>47_CCA_KMTQK.711.80	>48_CCA_EHNAK.595.80	>49_CAT_LSQSR.292.80	>51_CAG_MSHWR.243.80	>52_CAC_LGMRR.301.80
	NNCTCATTATAANN	NNCATGTTAATGNN	NNCTAATTAGGGNN	NNCTAATTACAANN	NNCTCATTAATTNN	NNTTTGTAATTANN	NNTATACTAATGNN	NNATCCATTAACNN	NNCTAATGAAGGNN	NNTTAATTAGTGNN	NNCTAATTAGGTNN	NNGGCTTAATCCNN	NNCCAATTATGANN	NNCGGATTATATNN	NNTCTGCTAATGNN	NNCTCATTAGCGNN	NNTTCACTAATGNN	NNCTAATTAGCGNN	NNGCGTATTAGANN	NNGCTAATTAAGNN	NNATGCTAAGTANN	NNCCACTTATCCNN	NNCTCATAAGTANN	NNGCCTAAGAGANN	NNTTCCTTAGCGNN	NNTCCCTTAGAANN	NNCGCCTTACGNN	NNCTCCTTAGGANN	NNGTCTTAAGCNN	NNGTGCTAAGCCNN	NNTACCTAAGTANN	NNGTCTTAGCANN	NNCCTCTTAGACNN	NNCGTCTTGAGANN	NNCTGCTAAGAANN	NNGCTAGTCAAGNN	NNACTAGTTACGNN	NNACCCCTTAAGNN	NNGCGCGTTAAGNN	NNCTCGTTATGGNN	NNTGGTTAGTCNN	NNTTTACATCTGNN	NNGCCGGTTAAANN	NNCCGGGTTAGGNN	NNCTGTTAACCANN	NNGAGTTAACTANN	NNATTCTTAACANN	NNTCGCTAACAGNN	NNGTGTGTTAATNN
	>1_TTT_RTVAA.136.81	>2_TTT_RTVSA.138.81	>4_TTC_VRVSA.139.81	>5_TTC_TRVAA.222.81	>6_TTA_VRVAA.349.81	>7_TTA_RVLRA.353.81	>8_TGT_RVVSQ.273.81	>9_TGG_KTTQD.331.81	>10_TGG_KSVMQ.212.81	>11_TGA_KSVAQ.309.81	>12_TGA_RGVAA.291.81	>13_TCT_ATVKA.398.81	>14_TCG_KGTQM.149.81	>15_TCC_RMIKS.200.81	>17_TAT_TRVSA.117.81	>18_TAG_RLTQA.229.81	>19_TAG_RMVSA.130.81	>20_TAC_QRVSA.184.81	>21_TAC_ERVSV.234.81	>22_TAA_RITAA.211.81	>23_GTT_GTRAY.296.81	>24_GTG_HLIQY.103.81	>25_GTA_YTRQV.250.81	>26_GGT_ALKNM.124.81	>27_GGT_LTKDQ.466.81	>28_GGG_RSKER.720.81	>29_GGC_TLKNQ.461.81	>30_GGA_LAKDQ.371.81	>31_GCT_KITKF.159.81	>32_GCC_VRLKY.114.81	>33_GCA_ALRQQ.120.81	>34_GAT_RTMRY.125.81	>35_GAG_VMRWY.130.81	>36_GAC_ATRRF.197.81	>37_GAA_RFQKF.98.81	>38_CTA_LHYAK.230.81	>39_CTA_IFNAK.172.81	>40_CGG_STRER.91.81	>41_CGC_RVMSR.171.81	>42_CGA_TFYAA.93.81	>43_CCT_MTNGK.318.81	>44_CCT_RGDSK.249.81	>45_CCG_RCYEK.367.81	>46_CCC_RLDSK.129.81	>47_CCA_KMTQK.711.81	>48_CCA_EHNAK.591.81	>49_CAT_LSQSR.290.81	>51_CAG_MSHWR.239.81	>52_CAC_LGMRR.299.81
	NNACTCATTAAGNN	NNGCTAATTAAANN	NNCGTATTATAANN	NNTAATTAAGTNN	NNCTCATTACAANN	NNCCTCTAATTANN	NNCACGCTAATGNN	NNGCCCATTACCNN	NNTCAATTAGTGNN	NNGCTCATTAAANN	NNGCCATTAGTANN	NNCGGATTACGGNN	NNCTCATTAGTANN	NNGGGCTAATCCNN	NNCGAATTAATANN	NNCCAATTACAANN	NNCTCATTAATTNN	NNCGCATTATAANN	NNTCGCATTAGTNN	NNTAATTAATTNN	NNCTACTTAAACNN	NNCCACTTAACNN	NNCTGTTAAGTANN	NNCGCCTTAAANN	NNCTCCTAAGGANN	NNTCCCTTAACNN	NNCGCCTTAGGTNN	NNTTCCTTACTANN	NNCGGCTTAAAGNN	NNTGGCTTAAGCNN	NNACATTAAGTANN	NNCGTCTTAATCNN	NNGCCTCTCTAANN	NNTGCGCATCGANN	NNTGCTTAAGCCNN	NNCCTAGTTAGCNN	NNCTCGTTAATANN	NNTCCGTTAAGTNN	NNCCGCGTTAACNN	NNCTCGTTAGGTNN	NNGTGGTTAACANN	NNTTAGGTTAACNN	NNCCGGTTAACNN	NNGCGGGTTACGNN	NNGCTAGTTACANN	NNGGTAGTTAAGNN	NNTGCCTTAACANN	NNCCTGTTACGANN	NNGTGTGTTATGNN
	>1_TTT_RTVAA.135.82	>2_TTT_RTVSA.137.82	>4_TTC_VRVSA.137.82	>5_TTC_TRVAA.220.82	>6_TTA_VRVAA.343.82	>7_TTA_RVLRA.351.82	>8_TGT_RVVSQ.270.82	>9_TGG_KTTQD.328.82	>10_TGG_KSVMQ.209.82	>11_TGA_KSVAQ.304.82	>12_TGA_RGVAA.290.82	>13_TCT_ATVKA.395.82	>14_TCG_KGTQM.148.82	>15_TCC_RMIKS.199.82	>17_TAT_TRVSA.113.82	>18_TAG_RLTQA.229.82	>19_TAG_RMVSA.130.82	>20_TAC_QRVSA.184.82	>21_TAC_ERVSV.227.82	>22_TAA_RITAA.211.82	>23_GTT_GTRAY.295.82	>24_GTG_HLIQY.101.82	>25_GTA_YTRQV.248.82	>26_GGT_ALKNM.123.82	>27_GGT_LTKDQ.465.82	>28_GGG_RSKER.710.82	>29_GGC_TLKNQ.454.82	>30_GGA_LAKDQ.368.82	>31_GCT_KITKF.159.82	>32_GCC_VRLKY.114.82	>33_GCA_ALRQQ.120.82	>34_GAT_RTMRY.121.82	>35_GAG_VMRWY.126.82	>36_GAC_ATRRF.193.82	>37_GAA_RFQKF.96.82	>38_CTA_LHYAK.224.82	>39_CTA_IFNAK.168.82	>40_CGG_STRER.91.82	>41_CGC_RVMSR.170.82	>42_CGA_TFYAA.92.82	>43_CCT_MTNGK.315.82	>44_CCT_RGDSK.247.82	>45_CCG_RCYEK.360.82	>46_CCC_RLDSK.124.82	>47_CCA_KMTQK.702.82	>48_CCA_EHNAK.581.82	>49_CAT_LSQSR.287.82	>51_CAG_MSHWR.239.82	>52_CAC_LGMRR.294.82
	NNCTCATTAAGGNN	NNGTGTTATGTTNN	NNCGTATTAGTCNN	NNCATTTAATTANN	NNCTAATTACTGNN	NNAGGTTAATTANN	NNCGCATTAAGCNN	NNGCCCATTACGNN	NNCTCATTAAGTNN	NNTCATTAAGCNN	NNCCCATTAATANN	NNTGGATTAAAGNN	NNTCGATTAGTANN	NNTGGATTAGCANN	NNTGCGTTAATANN	NNCTAATTAACANN	NNCGTATTAGTANN	NNCATATTAATGNN	NNCGTATTAAAGNN	NNCTAATTATGTNN	NNCTACTTACAGNN	NNACCCTAAGTGNN	NNGTCGTAAGTANN	NNCCGCCTTAAAANN	NNTCCTTAGTANN	NNCCCCCTTAAANN	NNCCGCCTTAAANN	NNTTCCTTAAAANN	NNCGTCTTAGTCNN	NNGTCTTAAGAANN	NNAACCTAAGTANN	NNCGTCTTATGNN	NNCCTCTTACANN	NNCGTCTTAGATNN	NNGCTACTTTAANN	NNCTAGTTATANN	NNACTAGTTACTNN	NNACCCGTTACANN	NNCGTGTTATTTNN	NNCTCGTTAGACNN	NNGTTAGTTAGANN	NNCCGGGTTAGGNN	NNTTTGGTTAAGNN	NNCATTGTACTANN	NNACATTAACTANN	NNGATGGTTACTNN	NNAAACTTAACANN	NNTGTTAATAANN	NNGTGTGTAAAGNN
	>1_TTT_RTVAA.135.83	>2_TTT_RTVSA.137.83	>4_TTC_VRVSA.136.83	>5_TTC_TRVAA.219.83	>6_TTA_VRVAA.341.83	>7_TTA_RVLRA.347.83	>8_TGT_RVVSQ.270.83	>9_TGG_KTTQD.323.83	>10_TGG_KSVMQ.197.83	>11_TGA_KSVAQ.302.83	>12_TGA_RGVAA.289.83	>13_TCT_ATVKA.389.83	>14_TCG_KGTQM.147.83	>15_TCC_RMIKS.199.83	>17_TAT_TRVSA.113.83	>18_TAG_RLTQA.227.83	>19_TAG_RMVSA.130.83	>20_TAC_QRVSA.178.83	>21_TAC_ERVSV.221.83	>22_TAA_RITAA.197.83	>23_GTT_GTRAY.294.83	>24_GTG_HLIQY.100.83	>25_GTA_YTRQV.243.83	>26_GGT_ALKNM.123.83	>27_GGT_LTKDQ.452.83	>28_GGG_RSKER.709.83	>29_GGC_TLKNQ.451.83	>30_GGA_LAKDQ.367.83	>31_GCT_KITKF.157.83	>32_GCC_VRLKY.113.83	>33_GCA_ALRQQ.118.83	>34_GAT_RTMRY.116.83	>35_GAG_VMRWY.122.83	>36_GAC_ATRRF.192.83	>37_GAA_RFQKF.96.83	>38_CTA_LHYAK.222.83	>39_CTA_IFNAK.168.83	>40_CGG_STRER.88.83	>41_CGC_RVMSR.166.83	>42_CGA_TFYAA.92.83	>43_CCT_MTNGK.311.83	>44_CCT_RGDSK.245.83	>45_CCG_RCYEK.356.83	>46_CCC_RLDSK.121.83	>47_CCA_KMTQK.695.83	>48_CCA_EHNAK.547.83	>49_CAT_LSQSR.286.83	>51_CAG_MSHWR.235.83	>52_CAC_LGMRR.291.83
	NNCTAATTAAAGNN	NNATGCATAATGNN	NNGCGCATTACANN	NNCGATTAATTANN	NNCTAATTAGTANN	NNTTTCTAATTANN	NNACACTTAATGNN	NNCCATTACGTNN	NNCTCATTAACTNN	NNCTCATTAAAANN	NNGTCTTAATTANN	NNGCTTAATCCNN	NNCCATTACGTNN	NNCGGATTACGANN	NNTGCATTAGTGNN	NNCCAATTAAGTNN	NNCTTATTAATGNN	NNCGAATTAGTANN	NNCATATTAATANN	NNCTTGTTAACANN	NNATCATAAGTANN	NNCCACTTAAAGNN	NNCCTACTTATANN	NNCCGCCTTAATNN	NNCCTCCTTAGTNN	NNTGCGCATCGANN	NNGCGCCTTAGTGNN	NNGCTCCTTATCNN	NNCGTCTTAACANN	NNAACTTAAGCCNN	NNGCTACTTACANN	NNCGTCCAGATTGNN	NNCCTCTTCAAANN	NNCGTCTCAATTNN	NNCTACTTAGGANN	NNACTAGTTAGANN	NNCTAGTTAAGTNN	NNTCCGTTAACGNN	NNTCGGTTAACANN	NNGCTCGTTATTNN	NNATTGGTTAAANN	NNCGGGTTAAGANN	NNCGGTTAGCANN	NNCATGTTTCGGNN	NNGCTGGTTAAGNN	NNTAGTTAATCNN	NNGTCATTAACANN	NNACCTGTTAAGNN	NNATCAGTCCTTNN
	>1_TTT_RTVAA.134.84	>2_TTT_RTVSA.136.84	>4_TTC_VRVSA.132.84	>5_TTC_TRVAA.217.84	>6_TTA_VRVAA.332.84	>7_TTA_RVLRA.345.84	>8_TGT_RVVSQ.267.84	>9_TGG_KTTQD.317.84	>10_TGG_KSVMQ.197.84	>11_TGA_KSVAQ.302.84	>12_TGA_RGVAA.282.84	>13_TCT_ATVKA.388.84	>14_TCG_KGTQM.145.84	>15_TCC_RMIKS.194.84	>17_TAT_TRVSA.113.84	>18_TAG_RLTQA.226.84	>19_TAG_RMVSA.130.84	>20_TAC_QRVSA.175.84	>21_TAC_ERVSV.217.84	>22_TAA_RITAA.196.84	>23_GTT_GTRAY.290.84	>24_GTG_HLIQY.99.84	>25_GTA_YTRQV.243.84	>26_GGT_ALKNM.122.84	>27_GGT_LTKDQ.442.84	>28_GGG_RSKER.699.84	>29_GGC_TLKNQ.447.84	>30_GGA_LAKDQ.356.84	>31_GCT_KITKF.154.84	>32_GCC_VRLKY.111.84	>33_GCA_ALRQQ.117.84	>34_GAT_RTMRY.116.84	>35_GAG_VMRWY.121.84	>36_GAC_ATRRF.192.84	>37_GAA_RFQKF.96.84	>38_CTA_LHYAK.222.84	>39_CTA_IFNAK.164.84	>40_CGG_STRER.87.84	>41_CGC_RVMSR.165.84	>42_CGA_TFYAA.92.84	>43_CCT_MTNGK.310.84	>44_CCT_RGDSK.242.84	>45_CCG_RCYEK.352.84	>46_CCC_RLDSK.120.84	>47_CCA_KMTQK.693.84	>48_CCA_EHNAK.540.84	>49_CAT_LSQSR.280.84	>51_CAG_MSHWR.223.84	>52_CAC_LGMRR.290.84
	NNTTGTTAATTANN	NNATTCCGCTCTNN	NNGTTAATTAGTNN	NNTTAATTAATANN	NNCTTATTAGAGNN	NNGTGCTAATTANN	NNTTTCTTAATGNN	NNTCCATTAGAGNN	NNCGCATTAAAGNN	NNTCATTAACTNN	NNCTCATTATCANN	NNGGATTAAGCNN	NNGCCCATTAATANN	NNAGGATTAATGNN	NNCATATTAGTANN	NNTCCTGACAGTNN	NNATCATTAATGNN	NNCGTCTTAATANN	NNCGCATTAGANN	NNCTAATTAGGNN	NNCTACTTAAGNN	NNCCTCTAAGTGNN	NNCTACTTATACNN	NNTCGCCTTACGNN	NNATGCTATCTTNN	NNCCCCTTACANN	NNGCGCCTCAAANN	NNCTCCTTAGTANN	NNTGGTTAAGCCNN	NNGACCTAAGCCNN	NNAGTTAAGTANN	NNCGTCTTATGTNN	NNCCTCTTATAANN	NNCGTCTTATATNN	NNGTTTTAAGAANN	NNGGTGGTTAAGNN	NNCCTCGTTATGNN	NNCCCCGTTAATNN	NNGCACTTAACANN	NNCTCGTTAAANN	NNCTTGGTTAACNN	NNTCAGGTTAAGNN	NNTCGGTTAATGNN	NNGCAGGTTATANN	NNACGTTAACCANN	NNACTAGTTAAANN	NNGCATGTTAAANN	NNACCCTGTTAANN	NNGTGTGTAACANN
	>1_TTT_RTVAA.133.85	>2_TTT_RTVSA.135.85	>4_TTC_VRVSA.131.85	>5_TTC_TRVAA.217.85	>6_TTA_VRVAA.325.85	>7_TTA_RVLRA.345.85	>8_TGT_RVVSQ.265.85	>9_TGG_KTTQD.311.85	>10_TGG_KSVMQ.196.85	>11_TGA_KSVAQ.292.85	>12_TGA_RGVAA.272.85	>13_TCT_ATVKA.387.85	>14_TCG_KGTQM.145.85	>15_TCC_RMIKS.192.85	>17_TAT_TRVSA.110.85	>18_TAG_RLTQA.226.85	>19_TAG_RMVSA.129.85	>20_TAC_QRVSA.171.85	>21_TAC_ERVSV.216.85	>22_TAA_RITAA.195.85	>23_GTT_GTRAY.283.85	>24_GTG_HLIQY.95.85	>25_GTA_YTRQV.240.85	>26_GGT_ALKNM.118.85	>27_GGT_LTKDQ.441.85	>28_GGG_RSKER.698.85	>29_GGC_TLKNQ.441.85	>30_GGA_LAKDQ.349.85	>31_GCT_KITKF.152.85	>32_GCC_VRLKY.111.85	>33_GCA_ALRQQ.116.85	>34_GAT_RTMRY.113.85	>35_GAG_VMRWY.119.85	>36_GAC_ATRRF.188.85	>37_GAA_RFQKF.95.85	>38_CTA_LHYAK.216.85	>39_CTA_IFNAK.163.85	>40_CGG_STRER.86.85	>41_CGC_RVMSR.160.85	>42_CGA_TFYAA.92.85	>43_CCT_MTNGK.306.85	>44_CCT_RGDSK.242.85	>45_CCG_RCYEK.351.85	>46_CCC_RLDSK.118.85	>47_CCA_KMTQK.687.85	>48_CCA_EHNAK.538.85	>49_CAT_LSQSR.279.85	>51_CAG_MSHWR.220.85	>52_CAC_LGMRR.290.85
	NNGTTCATTAGTNN	NNTGCGCTAATANN	NNCAAATTAATANN	NNGTCCAGATTANN	NNGCTAATTAAGNN	NNCTGCTAATTANN	NNCCTATTAATGNN	NNCCCCATTAACNN	NNACATTAGCANN	NNCTCATTATCNN	NNCTAATTACAANN	NNTTGCTAATCCNN	NNCCATTAAGCNN	NNGATTTAATCCNN	NNCGTGTTAATANN	NNCCAATTAAGANN	NNCTCACTAATANN	NNGCGTATTATGNN	NNCGTATTACGGNN	NNTCACTAATTANN	NNTTCCCAAGTANN	NNCCACTTATTGNN	NNCTACTTAGGGNN	NNCGCCTTAAGCNN	NNCCTCCTTAGCANN	NNTACTTAAGGGNN	NNGCGCCTTTAANN	NNACTCCTTATCNN	NNCGTCTTAAACNN	NNGGTCTTAAGANN	NNGGCTTAAGTANN	NNCATCTTAAGGNN	NNCCTCTTATGTNN	NNCGTCTTACGGNN	NNGCTTCTTACCNN	NNGCTAGTTACCNN	NNCCTAGTTATCNN	NNTCCGTTAAGANN	NNCGCGTTAACTNN	NNCTCGTTAATNN	NNGTCCTAACCCNN	NNTCAGGTTAAANN	NNTTGGTTATAANN	NNCGGGTTATGGNN	NNCTAGTTATGTNN	NNGCCTTAACCANN	NNGTGCTTAACANN	NNCCTGTTATTTNN	NNGTGTGTCAGGNN
	>1_TTT_RTVAA.132.86	>2_TTT_RTVSA.134.86	>4_TTC_VRVSA.131.86	>5_TTC_TRVAA.216.86	>6_TTA_VRVAA.321.86	>7_TTA_RVLRA.344.86	>8_TGT_RVVSQ.262.86	>9_TGG_KTTQD.296.86	>10_TGG_KSVMQ.186.86	>11_TGA_KSVAQ.283.86	>12_TGA_RGVAA.271.86	>13_TCT_ATVKA.384.86	>14_TCG_KGTQM.144.86	>15_TCC_RMIKS.189.86	>17_TAT_TRVSA.109.86	>18_TAG_RLTQA.225.86	>19_TAG_RMVSA.128.86	>20_TAC_QRVSA.168.86	>21_TAC_ERVSV.216.86	>22_TAA_RITAA.192.86	>23_GTT_GTRAY.283.86	>24_GTG_HLIQY.95.86	>25_GTA_YTRQV.239.86	>26_GGT_ALKNM.117.86	>27_GGT_LTKDQ.436.86	>28_GGG_RSKER.688.86	>29_GGC_TLKNQ.440.86	>30_GGA_LAKDQ.348.86	>31_GCT_KITKF.150.86	>32_GCC_VRLKY.110.86	>33_GCA_ALRQQ.116.86	>34_GAT_RTMRY.113.86	>35_GAG_VMRWY.118.86	>36_GAC_ATRRF.187.86	>37_GAA_RFQKF.94.86	>38_CTA_LHYAK.208.86	>39_CTA_IFNAK.162.86	>40_CGG_STRER.85.86	>41_CGC_RVMSR.157.86	>42_CGA_TFYAA.92.86	>43_CCT_MTNGK.304.86	>44_CCT_RGDSK.235.86	>45_CCG_RCYEK.342.86	>46_CCC_RLDSK.118.86	>47_CCA_KMTQK.687.86	>48_CCA_EHNAK.520.86	>49_CAT_LSQSR.277.86	>51_CAG_MSHWR.219.86	>52_CAC_LGMRR.287.86
	NNTAATTAACANN	NNCACATTATGANN	NNGCGTATTACANN	NNCTCATTAAGANN	NNCTAATTAATNN	NNCAACTAATTANN	NNGCCCTTAATGNN	NNCCCCATTAATNN	NNTCGTTAATGANN	NNTTCATTACGANN	NNTTAATTAAGTNN	NNGTCCTAATCCNN	NNTCCATTAATANN	NNCGGATTACGGNN	NNCGTATTAATNN	NNTCAATTAGTCNN	NNCACATTAAGGNN	NNACGTATTATANN	NNCGTATTAATTNN	NNTAATTAGGGNN	NNACGCTAAGTANN	NNTCCACTTAGTNN	NNTTATTAAGTANN	NNGCCTTAACGNN	NNACTCCTTATCNN	NNACCCCTTAACNN	NNGCGCCTTTGANN	NNCTCCTTACGNN	NNCGTCTTAAGNN	NNCGTCTCACGANN	NNACTGTAAGTANN	NNCGTCTTATTANN	NNCCTCTTTATANN	NNCGTCTTGACANN	NNCTACTTAATGNN	NNCCTAGTTAAATNN	NNTCCTGACAGTNN	NNCCCGTTAGCGNN	NNCCTCTTAACANN	NNCTCGTTAGTANN	NNATCGGTTAAGNN	NNCGGGTTAATCNN	NNGTCGGTTAATNN	NNGCTGGTTAATNN	NNTGGCTAACTANN	NNGCTCGTTAAGNN	NNCCATGTTAACNN	NNCCCTGTTACGNN	NNCGTGTTAGCGNN
	>1_TTT_RTVAA.131.87	>2_TTT_RTVSA.133.87	>4_TTC_VRVSA.128.87	>5_TTC_TRVAA.211.87	>6_TTA_VRVAA.318.87	>7_TTA_RVLRA.341.87	>8_TGT_RVVSQ.262.87	>9_TGG_KTTQD.287.87	>10_TGG_KSVMQ.182.87	>11_TGA_KSVAQ.283.87	>12_TGA_RGVAA.270.87	>13_TCT_ATVKA.366.87	>14_TCG_KGTQM.143.87	>15_TCC_RMIKS.188.87	>17_TAT_TRVSA.108.87	>18_TAG_RLTQA.217.87	>19_TAG_RMVSA.128.87	>20_TAC_QRVSA.167.87	>21_TAC_ERVSV.213.87	>22_TAA_RITAA.190.87	>23_GTT_GTRAY.281.87	>24_GTG_HLIQY.93.87	>25_GTA_YTRQV.239.87	>26_GGT_ALKNM.116.87	>27_GGT_LTKDQ.434.87	>28_GGG_RSKER.682.87	>29_GGC_TLKNQ.435.87	>30_GGA_LAKDQ.347.87	>31_GCT_KITKF.148.87	>32_GCC_VRLKY.109.87	>33_GCA_ALRQQ.113.87	>34_GAT_RTMRY.112.87	>35_GAG_VMRWY.117.87	>36_GAC_ATRRF.187.87	>37_GAA_RFQKF.91.87	>38_CTA_LHYAK.204.87	>39_CTA_IFNAK.157.87	>40_CGG_STRER.82.87	>41_CGC_RVMSR.155.87	>42_CGA_TFYAA.91.87	>43_CCT_MTNGK.300.87	>44_CCT_RGDSK.231.87	>45_CCG_RCYEK.341.87	>46_CCC_RLDSK.117.87	>47_CCA_KMTQK.677.87	>48_CCA_EHNAK.515.87	>49_CAT_LSQSR.274.87	>51_CAG_MSHWR.218.87	>52_CAC_LGMRR.284.87
	NNTGCGTTAATTNN	NNCGCACTAATANN	NNTACATTAATANN	NNTCCCTAATTANN	NNGTAATTAGTANN	NNTACATAATGANN	NNAATCTTAATGNN	NNGCCCATTATGANN	NNGCTCATTAAGNN	NNCTCATTAATCNN	NNATTAATTAGTNN	NNCCGGATTACGNN	NNGCCCATTAAANN	NNAGCATAATCCNN	NNGCGCATTAAGNN	NNACCAATTAAGNN	NNCTCATTAAGANN	NNCTCATTAGTANN	NNCGCATTAACNN	NNCCTAATTATANN	NNTTGCTAAGTANN	NNAGTTTAAGTGNN	NNATCATAAGTANN	NNGCGCCTTAAACNN	NNCCTCCTTAACNN	NNCCACTTAAGANN	NNTCGCCTTAACANN	NNTCCTTAAACNN	NNGTTCTTAAGCNN	NNGCGTTAAGCCNN	NNGCTACTTAGCNN	NNCTTCTTAAGANN	NNGCCTCTTATCNN	NNCGTCTTATTGNN	NNACTTCTTATGNN	NNCCTAGTTAGANN	NNTCTCGTTAGANN	NNCCCGTTATGGNN	NNCATGTTAGAGNN	NNCTCGTTAACGNN	NNCCTGGTTATCNN	NNTCGGGTTAGGNN	NNCTCGGTTAACNN	NNCGGGTTACANN	NNGCACTAACCANN	NNGGTAGTTAATNN	NNAATTTTAACANN	NNCTGTTTTTANN	NNTGTGTTAGGGNN
	>1_TTT_RTVAA.130.88	>2_TTT_RTVSA.129.88	>4_TTC_VRVSA.128.88	>5_TTC_TRVAA.210.88	>6_TTA_VRVAA.304.88	>7_TTA_RVLRA.340.88	>8_TGT_RVVSQ.262.88	>9_TGG_KTTQD.284.88	>10_TGG_KSVMQ.179.88	>11_TGA_KSVAQ.279.88	>12_TGA_RGVAA.268.88	>13_TCT_ATVKA.364.88	>14_TCG_KGTQM.142.88	>15_TCC_RMIKS.187.88	>17_TAT_TRVSA.106.88	>18_TAG_RLTQA.215.88	>19_TAG_RMVSA.127.88	>20_TAC_QRVSA.164.88	>21_TAC_ERVSV.212.88	>22_TAA_RITAA.190.88	>23_GTT_GTRAY.271.88	>24_GTG_HLIQY.92.88	>25_GTA_YTRQV.234.88	>26_GGT_ALKNM.108.88	>27_GGT_LTKDQ.434.88	>28_GGG_RSKER.681.88	>29_GGC_TLKNQ.422.88	>30_GGA_LAKDQ.343.88	>31_GCT_KITKF.146.88	>32_GCC_VRLKY.109.88	>33_GCA_ALRQQ.112.88	>34_GAT_RTMRY.108.88	>35_GAG_VMRWY.117.88	>36_GAC_ATRRF.186.88	>37_GAA_RFQKF.91.88	>38_CTA_LHYAK.200.88	>39_CTA_IFNAK.157.88	>40_CGG_STRER.80.88	>41_CGC_RVMSR.154.88	>42_CGA_TFYAA.90.88	>43_CCT_MTNGK.298.88	>44_CCT_RGDSK.230.88	>45_CCG_RCYEK.340.88	>46_CCC_RLDSK.114.88	>47_CCA_KMTQK.677.88	>48_CCA_EHNAK.496.88	>49_CAT_LSQSR.274.88	>51_CAG_MSHWR.217.88	>52_CAC_LGMRR.281.88
	NNCTCATTAAGTNN	NNTCATTAGTANN	NNCGTATTAGTTNN	NNGCGGTAATTANN	NNCTTATTAGAANN	NNCCTAATTATCNN	NNTTCATTAATGNN	NNGTCCATTATANN	NNCCATTAAGANN	NNTTCATTAGTANN	NNCGCTTAATTANN	NNCGGATTAATNN	NNACCCATTAACNN	NNGTCCTAATCCNN	NNCTAATTAAGGNN	NNGCCAATTATGNN	NNTAATTAATTNN	NNCGTATTACAGNN	NNCGCATTATTANN	NNCTAATTATACNN	NNTCTTTAAGTANN	NNCCACTTAGCGNN	NNAGGATAAGTANN	NNGCACCTTAGGNN	NNCTCCTTAACTNN	NNCCCCCTTATGNN	NNCCGCCTTATCNN	NNTTCCTTAACTNN	NNCGTCTTAGAANN	NNGTCTTAGAGNN	NNTACTTAACGNN	NNCGTCTTATCANN	NNGCCTCTTCGTNN	NNCGTCTTATCANN	NNGGTACTTAACNN	NNCCTAGTTAAGTNN	NNGATAGTTAGTNN	NNTCCCGTTATCNN	NNCCCTAACATGNN	NNCCTCGTTAGTGNN	NNGCAGGTTAGTNN	NNGCGGGTTTAANN	NNATTCCGCTCTNN	NNCGGGTTAGATNN	NNTTTTTAACTANN	NNACTAGTTATANN	NNCTTCTTAACANN	NNGCCTGTTACTNN	NNCGTGTTAACNN
	>1_TTT_RTVAA.130.89	>2_TTT_RTVSA.126.89	>4_TTC_VRVSA.126.89	>5_TTC_TRVAA.209.89	>6_TTA_VRVAA.295.89	>7_TTA_RVLRA.336.89	>8_TGT_RVVSQ.260.89	>9_TGG_KTTQD.282.89	>10_TGG_KSVMQ.177.89	>11_TGA_KSVAQ.279.89	>12_TGA_RGVAA.267.89	>13_TCT_ATVKA.364.89	>14_TCG_KGTQM.141.89	>15_TCC_RMIKS.185.89	>17_TAT_TRVSA.104.89	>18_TAG_RLTQA.214.89	>19_TAG_RMVSA.127.89	>20_TAC_QRVSA.161.89	>21_TAC_ERVSV.208.89	>22_TAA_RITAA.188.89	>23_GTT_GTRAY.271.89	>24_GTG_HLIQY.92.89	>25_GTA_YTRQV.232.89	>26_GGT_ALKNM.108.89	>27_GGT_LTKDQ.428.89	>28_GGG_RSKER.676.89	>29_GGC_TLKNQ.421.89	>30_GGA_LAKDQ.342.89	>31_GCT_KITKF.143.89	>32_GCC_VRLKY.108.89	>33_GCA_ALRQQ.112.89	>34_GAT_RTMRY.107.89	>35_GAG_VMRWY.116.89	>36_GAC_ATRRF.183.89	>37_GAA_RFQKF.90.89	>38_CTA_LHYAK.199.89	>39_CTA_IFNAK.153.89	>40_CGG_STRER.78.89	>41_CGC_RVMSR.153.89	>42_CGA_TFYAA.86.89	>43_CCT_MTNGK.298.89	>44_CCT_RGDSK.224.89	>45_CCG_RCYEK.337.89	>46_CCC_RLDSK.112.89	>47_CCA_KMTQK.677.89	>48_CCA_EHNAK.490.89	>49_CAT_LSQSR.271.89	>51_CAG_MSHWR.216.89	>52_CAC_LGMRR.278.89
	NNCTCATTAAAGNN	NNCGCGCTAATANN	NNTTAATTAAGANN	NNATCGTAATTANN	NNCTAATTTGCANN	NNCTAATTAGATNN	NNCACATTATGANN	NNGTCCATTATGNN	NNCTAATTAAGGNN	NNCTCATTAGATNN	NNCTTCATTAAANN	NNTGCTTAATCCNN	NNGCCCATTATGNN	NNAGGGATTAATNN	NNGCGTATTAGANN	NNTCAATTAGGGNN	NNTCTCATTAACNN	NNTGCATTAAGANN	NNGCATTAACANN	NNTAATTAGATNN	NNCTACTTAAANN	NNACCTTAAGTGNN	NNACATTAAGTANN	NNGCGCCTTAAGGNN	NNTTCCTTATGGNN	NNCCCCCTCAATNN	NNCGCCTTACAANN	NNCTCCTTAGCGNN	NNCTCTTAAGCCNN	NNGAGGCTTAACNN	NNTAATTAAGTANN	NNCGTCTTATTGNN	NNGCCTCTCTAGNN	NNCGTCTTATACNN	NNGCTACTTAACNN	NNGCTAGTTAAGANN	NNGCTCGTTACTNN	NNGCCCGTTAATTNN	NNTTACTTAACANN	NNCTCGTTATGNN	NNCTGGTTAGTCNN	NNTGTATCCCCTNN	NNTGGTTACGANN	NNCATGCTATGANN	NNCTAGTTAACCNN	NNTCGTTAACTANN	NNAAGCTTAACANN	NNCTGTTACGCNN	NNGTGTGTTACTNN
	>1_TTT_RTVAA.129.90	>2_TTT_RTVSA.126.90	>4_TTC_VRVSA.126.90	>5_TTC_TRVAA.207.90	>6_TTA_VRVAA.294.90	>7_TTA_RVLRA.335.90	>8_TGT_RVVSQ.260.90	>9_TGG_KTTQD.277.90	>10_TGG_KSVMQ.177.90	>11_TGA_KSVAQ.277.90	>12_TGA_RGVAA.265.90	>13_TCT_ATVKA.358.90	>14_TCG_KGTQM.141.90	>15_TCC_RMIKS.183.90	>17_TAT_TRVSA.104.90	>18_TAG_RLTQA.213.90	>19_TAG_RMVSA.126.90	>20_TAC_QRVSA.159.90	>21_TAC_ERVSV.207.90	>22_TAA_RITAA.185.90	>23_GTT_GTRAY.271.90	>24_GTG_HLIQY.88.90	>25_GTA_YTRQV.231.90	>26_GGT_ALKNM.107.90	>27_GGT_LTKDQ.426.90	>28_GGG_RSKER.665.90	>29_GGC_TLKNQ.412.90	>30_GGA_LAKDQ.333.90	>31_GCT_KITKF.143.90	>32_GCC_VRLKY.107.90	>33_GCA_ALRQQ.111.90	>34_GAT_RTMRY.105.90	>35_GAG_VMRWY.116.90	>36_GAC_ATRRF.182.90	>37_GAA_RFQKF.90.90	>38_CTA_LHYAK.197.90	>39_CTA_IFNAK.152.90	>40_CGG_STRER.78.90	>41_CGC_RVMSR.153.90	>42_CGA_TFYAA.86.90	>43_CCT_MTNGK.296.90	>44_CCT_RGDSK.223.90	>45_CCG_RCYEK.334.90	>46_CCC_RLDSK.108.90	>47_CCA_KMTQK.673.90	>48_CCA_EHNAK.489.90	>49_CAT_LSQSR.270.90	>51_CAG_MSHWR.214.90	>52_CAC_LGMRR.276.90
	NNTAATTAGGGNN	NNCACATTAAGANN	NNTTCACTAATANN	NNCTCATTAGAGNN	NNGCTAATTATANN	NNCTTTTAATTANN	NNGTTACTAATGNN	NNCCATTAGTANN	NNTACATTAGAGNN	NNATTCATTAACNN	NNTTCATTAGCANN	NNCGGATTATACNN	NNTGCGCATCGGNN	NNCGGTTAATCCNN	NNCATATTAATGNN	NNCCAATTATANN	NNCTTGTTAATTNN	NNTGCATTAATANN	NNCCGCATTATANN	NNCTACACTTTGNN	NNACATTAAGTANN	NNGCCACTTAGTNN	NNTCTACTTAAANN	NNCCGCCTTACANN	NNTTCCTTAAANN	NNTCCCTTAGCGNN	NNCACCTTAGAGNN	NNCTCCTTACANN	NNAGGCTTAAGCNN	NNAGGCTTAAGCNN	NNCTACTTAGAANN	NNCATCCTAAGANN	NNGCCTCTTCATNN	NNGCGTCTTATGNN	NNGGGGCTTAAANN	NNCTAGTTAACTNN	NNCCTAGTTAGCANN	NNGAGTGTCCTGNN	NNACTGTTAACANN	NNATGCTATCTTNN	NNGCAGGTTATANN	NNTCAGGTTAATNN	NNCCAGTTAAAGNN	NNGCAGGTTAGANN	NNAGGCTAACCANN	NNGCTGGTTACGNN	NNCATGTTAACTNN	NNGCCTGTCATGNN	NNCGTGTTAAACNN
	>1_TTT_RTVAA.129.91	>2_TTT_RTVSA.125.91	>4_TTC_VRVSA.125.91	>5_TTC_TRVAA.207.91	>6_TTA_VRVAA.289.91	>7_TTA_RVLRA.334.91	>8_TGT_RVVSQ.256.91	>9_TGG_KTTQD.275.91	>10_TGG_KSVMQ.176.91	>11_TGA_KSVAQ.274.91	>12_TGA_RGVAA.264.91	>13_TCT_ATVKA.355.91	>14_TCG_KGTQM.141.91	>15_TCC_RMIKS.180.91	>17_TAT_TRVSA.102.91	>18_TAG_RLTQA.213.91	>19_TAG_RMVSA.126.91	>20_TAC_QRVSA.159.91	>21_TAC_ERVSV.206.91	>22_TAA_RITAA.181.91	>23_GTT_GTRAY.270.91	>24_GTG_HLIQY.87.91	>25_GTA_YTRQV.230.91	>26_GGT_ALKNM.103.91	>27_GGT_LTKDQ.421.91	>28_GGG_RSKER.659.91	>29_GGC_TLKNQ.398.91	>30_GGA_LAKDQ.328.91	>31_GCT_KITKF.142.91	>32_GCC_VRLKY.106.91	>33_GCA_ALRQQ.109.91	>34_GAT_RTMRY.105.91	>35_GAG_VMRWY.116.91	>36_GAC_ATRRF.181.91	>37_GAA_RFQKF.87.91	>38_CTA_LHYAK.193.91	>39_CTA_IFNAK.151.91	>40_CGG_STRER.77.91	>41_CGC_RVMSR.152.91	>42_CGA_TFYAA.86.91	>43_CCT_MTNGK.295.91	>44_CCT_RGDSK.218.91	>45_CCG_RCYEK.333.91	>46_CCC_RLDSK.108.91	>47_CCA_KMTQK.672.91	>48_CCA_EHNAK.483.91	>49_CAT_LSQSR.269.91	>51_CAG_MSHWR.213.91	>52_CAC_LGMRR.275.91
	NNTTCATAATTANN	NNGTCGCTAATANN	NNCGTATTATTANN	NNTATTTAATTANN	NNCCGCTAATTANN	NNCTAATTAGACNN	NNCGCATTAGGGNN	NNGCCCATTAGAGNN	NNCACATTATGANN	NNTCCTGACAGTNN	NNGTAATTAGTANN	NNCGGATTAGATNN	NNTCCCATTAATANN	NNCGGATTAGACNN	NNGTCCAGCTTGNN	NNTAATTAACANN	NNTTCACTAATANN	NNCGCATTAATCNN	NNTGTATTAACNN	NNCTCGTTAATANN	NNAATTTAAGTANN	NNCCACTTAAGGNN	NNCGTCTAAGTANN	NNCGCCTTAACTNN	NNCTCCTTAGATNN	NNCTCCCTTAAGNN	NNCGCCTTAGTCNN	NNCCCCTAAGGANN	NNTGGCTTAAGANN	NNGTCTAAGCCNN	NNCTACTTAATGNN	NNGTCTTAACANN	NNCCTCTTACTGNN	NNCGTCTTAGCGNN	NNTTCTTAGCANN	NNGCTAGTCAACNN	NNCTAGTTAAATNN	NNGTCCGTTAATTNN	NNCTTGTTAGTGNN	NNACTCGTTAGTGNN	NNGTTGGTTAGANN	NNCGGGTTATGGNN	NNTTCGGTTAACNN	NNGCTGGTTACANN	NNGGTGGTTAAANN	NNCCGTTAACCANN	NNGGAGTTAACANN	NNCTGTTAGTTNN	NNTCGTGTTAAGNN
	>1_TTT_RTVAA.127.92	>2_TTT_RTVSA.124.92	>4_TTC_VRVSA.125.92	>5_TTC_TRVAA.205.92	>6_TTA_VRVAA.289.92	>7_TTA_RVLRA.333.92	>8_TGT_RVVSQ.256.92	>9_TGG_KTTQD.272.92	>10_TGG_KSVMQ.175.92	>11_TGA_KSVAQ.272.92	>12_TGA_RGVAA.262.92	>13_TCT_ATVKA.354.92	>14_TCG_KGTQM.140.92	>15_TCC_RMIKS.178.92	>17_TAT_TRVSA.101.92	>18_TAG_RLTQA.213.92	>19_TAG_RMVSA.125.92	>20_TAC_QRVSA.150.92	>21_TAC_ERVSV.202.92	>22_TAA_RITAA.178.92	>23_GTT_GTRAY.269.92	>24_GTG_HLIQY.84.92	>25_GTA_YTRQV.227.92	>26_GGT_ALKNM.103.92	>27_GGT_LTKDQ.412.92	>28_GGG_RSKER.658.92	>29_GGC_TLKNQ.397.92	>30_GGA_LAKDQ.322.92	>31_GCT_KITKF.142.92	>32_GCC_VRLKY.106.92	>33_GCA_ALRQQ.108.92	>34_GAT_RTMRY.102.92	>35_GAG_VMRWY.113.92	>36_GAC_ATRRF.177.92	>37_GAA_RFQKF.86.92	>38_CTA_LHYAK.193.92	>39_CTA_IFNAK.150.92	>40_CGG_STRER.77.92	>41_CGC_RVMSR.152.92	>42_CGA_TFYAA.84.92	>43_CCT_MTNGK.295.92	>44_CCT_RGDSK.215.92	>45_CCG_RCYEK.332.92	>46_CCC_RLDSK.103.92	>47_CCA_KMTQK.671.92	>48_CCA_EHNAK.482.92	>49_CAT_LSQSR.266.92	>51_CAG_MSHWR.212.92	>52_CAC_LGMRR.275.92
	NNCTAATTAATNN	NNTCCGCTAATANN	NNCGAATTAAGGNN	NNGAGCTAATTANN	NNCTTATTAGTTNN	NNAATTTAATTANN	NNTCACATTAACNN	NNACCCATTAGANN	NNTACATTAAGGNN	NNGCTTTGATGANN	NNCTAATTAAANN	NNCGGATTATANN	NNGTAGCCAATGNN	NNGAGGATTAGANN	NNCTCATTAATANN	NNTAATTAGAGNN	NNCGCGTTAATANN	NNCGTATTAACCNN	NNCGCATTACGCNN	NNCCTAATTAAANN	NNCTTGTAAGTANN	NNCGCCTAAGTGNN	NNGTGCTAAGTANN	NNTCGCCTTATGNN	NNCTCCTTAACCNN	NNATCCCTTAAANN	NNGCGCCTTTTGNN	NNCTCCTTTACANN	NNGGTCTTAAGGNN	NNTGTCTTAGAGNN	NNCCTACTTAGANN	NNCATCTTAATGNN	NNGCCTCTCTATNN	NNTGTCTTAAGANN	NNACGTTAAGAANN	NNCTAGTTAGGTNN	NNCCTAGTTACANN	NNGTCCGTTATANN	NNCGTGTTAGTGNN	NNCTCGTTAAGCNN	NNTGCTGTAACCNN	NNTCGGGTTAGCNN	NNCCGGTTAGTGNN	NNCCGGGTTTAGNN	NNTCTAGTTAAANN	NNGATAGTTAAANN	NNCGTGTTAAGTNN	NNGCCTGTCAAANN	NNTGTGTTAAGGNN
	>1_TTT_RTVAA.121.93	>2_TTT_RTVSA.123.93	>4_TTC_VRVSA.125.93	>5_TTC_TRVAA.204.93	>6_TTA_VRVAA.282.93	>7_TTA_RVLRA.332.93	>8_TGT_RVVSQ.254.93	>9_TGG_KTTQD.267.93	>10_TGG_KSVMQ.174.93	>11_TGA_KSVAQ.271.93	>12_TGA_RGVAA.259.93	>13_TCT_ATVKA.350.93	>14_TCG_KGTQM.139.93	>15_TCC_RMIKS.178.93	>17_TAT_TRVSA.101.93	>18_TAG_RLTQA.212.93	>19_TAG_RMVSA.125.93	>20_TAC_QRVSA.149.93	>21_TAC_ERVSV.202.93	>22_TAA_RITAA.178.93	>23_GTT_GTRAY.269.93	>24_GTG_HLIQY.83.93	>25_GTA_YTRQV.225.93	>26_GGT_ALKNM.100.93	>27_GGT_LTKDQ.409.93	>28_GGG_RSKER.653.93	>29_GGC_TLKNQ.394.93	>30_GGA_LAKDQ.321.93	>31_GCT_KITKF.140.93	>32_GCC_VRLKY.106.93	>33_GCA_ALRQQ.106.93	>34_GAT_RTMRY.97.93	>35_GAG_VMRWY.113.93	>36_GAC_ATRRF.176.93	>37_GAA_RFQKF.86.93	>38_CTA_LHYAK.192.93	>39_CTA_IFNAK.145.93	>40_CGG_STRER.75.93	>41_CGC_RVMSR.151.93	>42_CGA_TFYAA.81.93	>43_CCT_MTNGK.293.93	>44_CCT_RGDSK.213.93	>45_CCG_RCYEK.331.93	>46_CCC_RLDSK.103.93	>47_CCA_KMTQK.662.93	>48_CCA_EHNAK.477.93	>49_CAT_LSQSR.266.93	>51_CAG_MSHWR.211.93	>52_CAC_LGMRR.267.93
	NNGCTCATTATGNN	NNCTAATTAGTANN	NNGCGCATTAACNN	NNGCTAATTATCNN	NNATGCTATCTTNN	NNCTCATTAGCGNN	NNGCATTAGCANN	NNTCCCATTAGTNN	NNCTCATTATGTNN	NNCTCATTACGGNN	NNTCTAATTAAANN	NNGAGGATTATCNN	NNCCAATTAGGANN	NNTCGGATTAATNN	NNATCTTATTACNN	NNGCTTGTTAAANN	NNCTCATTAGTANN	NNGCGTATTATANN	NNCGTATTAATNN	NNCTCATTATAANN	NNACGACTCAGTNN	NNTCCACTTACCNN	NNCTACTTATCNN	NNCGCCTTAGCANN	NNTTCCTTAAGTNN	NNCCCCTCAACANN	NNCCGCCTTAGTGNN	NNCTCCTTAGCNN	NNCGTCTTAGTANN	NNCCCCTAAGCCNN	NNCGGTTAAGTANN	NNTGTCTTAGTANN	NNCCTCTTATTANN	NNCGTCTTCAAGNN	NNACTACTTAGCNN	NNGCTGGTTACANN	NNGCTAGTCAAGNN	NNTCCGTTAAGCNN	NNCCACTTAACANN	NNCCTCGTTACTNN	NNCGGGTTAACCNN	NNGCAGGTTATANN	NNGTTGGTTAAGNN	NNGCAGGTTACGNN	NNGATGGTTAGTNN	NNACTGGTTAGGNN	NNTTCACTAACANN	NNAGTGCTTCACNN	NNGTGTGTCAGTNN
	>1_TTT_RTVAA.120.94	>2_TTT_RTVSA.123.94	>4_TTC_VRVSA.125.94	>5_TTC_TRVAA.203.94	>6_TTA_VRVAA.278.94	>7_TTA_RVLRA.331.94	>8_TGT_RVVSQ.252.94	>9_TGG_KTTQD.265.94	>10_TGG_KSVMQ.172.94	>11_TGA_KSVAQ.271.94	>12_TGA_RGVAA.258.94	>13_TCT_ATVKA.349.94	>14_TCG_KGTQM.139.94	>15_TCC_RMIKS.172.94	>17_TAT_TRVSA.100.94	>18_TAG_RLTQA.211.94	>19_TAG_RMVSA.124.94	>20_TAC_QRVSA.148.94	>21_TAC_ERVSV.198.94	>22_TAA_RITAA.173.94	>23_GTT_GTRAY.261.94	>24_GTG_HLIQY.83.94	>25_GTA_YTRQV.222.94	>26_GGT_ALKNM.94.94	>27_GGT_LTKDQ.404.94	>28_GGG_RSKER.649.94	>29_GGC_TLKNQ.387.94	>30_GGA_LAKDQ.320.94	>31_GCT_KITKF.135.94	>32_GCC_VRLKY.103.94	>33_GCA_ALRQQ.102.94	>34_GAT_RTMRY.95.94	>35_GAG_VMRWY.113.94	>36_GAC_ATRRF.176.94	>37_GAA_RFQKF.85.94	>38_CTA_LHYAK.188.94	>39_CTA_IFNAK.144.94	>40_CGG_STRER.75.94	>41_CGC_RVMSR.150.94	>42_CGA_TFYAA.77.94	>43_CCT_MTNGK.293.94	>44_CCT_RGDSK.211.94	>45_CCG_RCYEK.328.94	>46_CCC_RLDSK.99.94	>47_CCA_KMTQK.660.94	>48_CCA_EHNAK.470.94	>49_CAT_LSQSR.265.94	>51_CAG_MSHWR.211.94	>52_CAC_LGMRR.263.94
	NNCTAATTATTTNN	NNCTCGCTAATANN	NNGCGTATTATANN	NNCGGTTAATTANN	NNTGCTTAATTANN	NNCTAATTACAANN	NNGGTCCTAATGNN	NNCCCATTACATNN	NNTGCATTAATANN	NNTTCATTAATTNN	NNCTAATTAAGCNN	NNCGGATTACTTNN	NNCCCATTAACANN	NNGACTTAATCCNN	NNCGCATTAGAGNN	NNCTTGTTAAGGNN	NNATGCATAATGNN	NNGCGCATTACANN	NNCGCATTAGTNN	NNAGCTTAATTANN	NNCTACTTACGTNN	NNCCACTTAAGNN	NNCGCCTAAGTANN	NNCACCTTAGGANN	NNCTCCTTTATGNN	NNCTCCCTCAAGNN	NNCGCCTTATTGNN	NNCTTCCTTATANN	NNCTGTTAAGCCNN	NNACTCTAAGCCNN	NNTGGTTAAGTANN	NNGCGTCTTAGCNN	NNTCCTCTCAAGNN	NNCGTCTTACGNN	NNGCTACTTACGNN	NNCTAGTTACANN	NNGGTAGTTAGCNN	NNTCCGTTATAGNN	NNCTCGCTAACANN	NNGCTCGTTAGTGNN	NNTTGGTTAGTANN	NNCGGGTTATGTNN	NNTCGGTTATTANN	NNCGGGTTAGCGNN	NNCTCTTAACTANN	NNATCAGTCCTTNN	NNCATGTTAGTGNN	NNCCTGTTAACNN	NNTGTGTTAATGNN
	>1_TTT_RTVAA.120.95	>2_TTT_RTVSA.122.95	>4_TTC_VRVSA.125.95	>5_TTC_TRVAA.203.95	>6_TTA_VRVAA.277.95	>7_TTA_RVLRA.330.95	>8_TGT_RVVSQ.251.95	>9_TGG_KTTQD.264.95	>10_TGG_KSVMQ.172.95	>11_TGA_KSVAQ.262.95	>12_TGA_RGVAA.255.95	>13_TCT_ATVKA.348.95	>14_TCG_KGTQM.135.95	>15_TCC_RMIKS.171.95	>17_TAT_TRVSA.100.95	>18_TAG_RLTQA.208.95	>19_TAG_RMVSA.122.95	>20_TAC_QRVSA.145.95	>21_TAC_ERVSV.196.95	>22_TAA_RITAA.173.95	>23_GTT_GTRAY.259.95	>24_GTG_HLIQY.82.95	>25_GTA_YTRQV.221.95	>26_GGT_ALKNM.93.95	>27_GGT_LTKDQ.402.95	>28_GGG_RSKER.644.95	>29_GGC_TLKNQ.387.95	>30_GGA_LAKDQ.315.95	>31_GCT_KITKF.134.95	>32_GCC_VRLKY.102.95	>33_GCA_ALRQQ.99.95	>34_GAT_RTMRY.94.95	>35_GAG_VMRWY.112.95	>36_GAC_ATRRF.175.95	>37_GAA_RFQKF.84.95	>38_CTA_LHYAK.183.95	>39_CTA_IFNAK.141.95	>40_CGG_STRER.72.95	>41_CGC_RVMSR.149.95	>42_CGA_TFYAA.77.95	>43_CCT_MTNGK.291.95	>44_CCT_RGDSK.211.95	>45_CCG_RCYEK.328.95	>46_CCC_RLDSK.98.95	>47_CCA_KMTQK.658.95	>48_CCA_EHNAK.467.95	>49_CAT_LSQSR.265.95	>51_CAG_MSHWR.210.95	>52_CAC_LGMRR.261.95
	NNGATGCTAATTNN	NNTGCATTAATANN	NNTTCATTAATANN	NNCTAATTAGAANN	NNCCTCATTAGANN	NNGCGTTAATGANN	NNCACATTAAGANN	NNCCCCATTATGNN	NNTCATTATGANN	NNGTTCATTATCNN	NNTTCATTAATGNN	NNGGGGATTAATNN	NNCCCATTAAGTNN	NNCCGGATTAATNN	NNCGTATTACGTNN	NNCCAATTATTANN	NNCTAATTAAGGNN	NNCGAATTAGCANN	NNCGTATTTAGGNN	NNCTAATTAAANN	NNCTACTTCAAANN	NNCCCACTTAAGANN	NNCTACTTAGTGNN	NNTCGCCTTAATNN	NNCTCCTTAGCNN	NNGCCCCTCAACNN	NNCCACCTTAAANN	NNTTCCTTAGCTNN	NNTGGCTTAGCANN	NNAAACTAAGCCNN	NNCTACTCAGGANN	NNTATCTTAAGANN	NNCCCTCTTAACNN	NNCGTCTTATGCNN	NNTTTCAAGTCANN	NNGCTAGTTTAANN	NNGGTAGTTAGANN	NNCCCGTTAGTTNN	NNTCGCGTTAACNN	NNCTCGTTAGCANN	NNGGTAAAGCATNN	NNGGGTTAGCANN	NNCAGTTAATGNN	NNCGGGTTACCANN	NNTCACTAACTANN	NNCTAGTTAATGNN	NNATTGCTAACANN	NNCCTGTTACGGNN	NNGCGTGCTAGANN
	>1_TTT_RTVAA.120.96	>2_TTT_RTVSA.118.96	>4_TTC_VRVSA.123.96	>5_TTC_TRVAA.200.96	>6_TTA_VRVAA.277.96	>7_TTA_RVLRA.330.96	>8_TGT_RVVSQ.249.96	>9_TGG_KTTQD.261.96	>10_TGG_KSVMQ.172.96	>11_TGA_KSVAQ.260.96	>12_TGA_RGVAA.255.96	>13_TCT_ATVKA.336.96	>14_TCG_KGTQM.131.96	>15_TCC_RMIKS.170.96	>17_TAT_TRVSA.100.96	>18_TAG_RLTQA.207.96	>19_TAG_RMVSA.121.96	>20_TAC_QRVSA.145.96	>21_TAC_ERVSV.195.96	>22_TAA_RITAA.172.96	>23_GTT_GTRAY.257.96	>24_GTG_HLIQY.81.96	>25_GTA_YTRQV.221.96	>26_GGT_ALKNM.92.96	>27_GGT_LTKDQ.399.96	>28_GGG_RSKER.638.96	>29_GGC_TLKNQ.386.96	>30_GGA_LAKDQ.314.96	>31_GCT_KITKF.134.96	>32_GCC_VRLKY.101.96	>33_GCA_ALRQQ.99.96	>34_GAT_RTMRY.94.96	>35_GAG_VMRWY.112.96	>36_GAC_ATRRF.173.96	>37_GAA_RFQKF.84.96	>38_CTA_LHYAK.178.96	>39_CTA_IFNAK.139.96	>40_CGG_STRER.71.96	>41_CGC_RVMSR.147.96	>42_CGA_TFYAA.77.96	>43_CCT_MTNGK.291.96	>44_CCT_RGDSK.206.96	>45_CCG_RCYEK.320.96	>46_CCC_RLDSK.97.96	>47_CCA_KMTQK.645.96	>48_CCA_EHNAK.467.96	>49_CAT_LSQSR.258.96	>51_CAG_MSHWR.208.96	>52_CAC_LGMRR.259.96
	NNCGACTAATTANN	NNACATTAGCANN	NNTATATTAATANN	NNTTCATAATTANN	NNGCTAATTATGNN	NNTTCCTAATTANN	NNGTTGTTAATGNN	NNTCCCATTACANN	NNCTCATTAGCANN	NNTTCATTAAGTNN	NNCTAATTAATNN	NNGGATTAATANN	NNGCCAATTAGTNN	NNCGGATTATANN	NNTTCATTAATANN	NNCCAATTAGATNN	NNCGCATTATTANN	NNACGTATTAACNN	NNCGTATTAAAANN	NNTCTAATTAAANN	NNTATTTAAGTANN	NNGCCACTTATTNN	NNCCTACTTAAANN	NNGCGCCTTACCNN	NNTTCCTTAGAGNN	NNCCCCCTCACANN	NNGCCTTAATANN	NNTTACTAAGGANN	NNTGGCTTAGTANN	NNTTCTAAAGCCNN	NNTTTGTAAGTANN	NNCCTACTTAAGNN	NNCCCTCTTACANN	NNCGTCTCATAGNN	NNACTACTTATTNN	NNGCTAGTTAGTANN	NNCTAGTTAACANN	NNCGTCCAGATTGNN	NNTGCCTTAACANN	NNTCTCGTTACANN	NNGCTGGTTAATNN	NNGATGGTTAAANN	NNCTGGTTATTANN	NNTCTAGTTAAGNN	NNGCTGGTTAGCNN	NNAATGGTTAATNN	NNCATATTAACANN	NNTCCTGTTATANN	NNCGTGTTAATTNN
	>1_TTT_RTVAA.119.97	>2_TTT_RTVSA.118.97	>4_TTC_VRVSA.122.97	>5_TTC_TRVAA.198.97	>6_TTA_VRVAA.275.97	>7_TTA_RVLRA.325.97	>8_TGT_RVVSQ.247.97	>9_TGG_KTTQD.261.97	>10_TGG_KSVMQ.170.97	>11_TGA_KSVAQ.251.97	>12_TGA_RGVAA.250.97	>13_TCT_ATVKA.336.97	>14_TCG_KGTQM.129.97	>15_TCC_RMIKS.169.97	>17_TAT_TRVSA.99.97	>18_TAG_RLTQA.205.97	>19_TAG_RMVSA.118.97	>20_TAC_QRVSA.144.97	>21_TAC_ERVSV.194.97	>22_TAA_RITAA.166.97	>23_GTT_GTRAY.256.97	>24_GTG_HLIQY.79.97	>25_GTA_YTRQV.220.97	>26_GGT_ALKNM.91.97	>27_GGT_LTKDQ.393.97	>28_GGG_RSKER.634.97	>29_GGC_TLKNQ.375.97	>30_GGA_LAKDQ.307.97	>31_GCT_KITKF.133.97	>32_GCC_VRLKY.100.97	>33_GCA_ALRQQ.99.97	>34_GAT_RTMRY.93.97	>35_GAG_VMRWY.111.97	>36_GAC_ATRRF.172.97	>37_GAA_RFQKF.81.97	>38_CTA_LHYAK.170.97	>39_CTA_IFNAK.137.97	>40_CGG_STRER.71.97	>41_CGC_RVMSR.147.97	>42_CGA_TFYAA.74.97	>43_CCT_MTNGK.290.97	>44_CCT_RGDSK.206.97	>45_CCG_RCYEK.317.97	>46_CCC_RLDSK.96.97	>47_CCA_KMTQK.642.97	>48_CCA_EHNAK.465.97	>49_CAT_LSQSR.255.97	>51_CAG_MSHWR.204.97	>52_CAC_LGMRR.258.97
	NNTCATTAAGTNN	NNGCGCATGAGANN	NNCTAATTAATANN	NNGATTTAATTANN	NNACTAATTAGANN	NNGCTCATTAAGNN	NNGTCACTAATGNN	NNCCCATTAAANN	NNGCATTAGCANN	NNGCGTTAATGANN	NNCTCATTAACTNN	NNCGGATTAATANN	NNCTCATTAATANN	NNGGGGATTACANN	NNCGTATTAAATNN	NNGCCAATTATCNN	NNCGCGCTAATGNN	NNCGTATTAGATNN	NNCGTATTACTCNN	NNCTAATTATAANN	NNCTACTTAGACNN	NNACCACTTACANN	NNCCCATAAGTANN	NNCGCCTTAACGNN	NNCTCCTTAGCGNN	NNCCCCTTAGCGNN	NNACGCCTTATGNN	NNTGCCTAAGGANN	NNGAGTTAAGCCNN	NNTGGTTAAGACNN	NNCCTACTTAAANN	NNCGTCTTATGCNN	NNCCTCTTCAGCNN	NNCGTCTCACGTNN	NNGGTACTTAATNN	NNCTAGTTAGTTNN	NNGCTCGTTAGGNN	NNGCCCGTTAGANN	NNCTTCTTAACANN	NNACTTGTTAAGNN	NNCTGGTTAAACNN	NNGCAGGTTAGTNN	NNTGGTTATTANN	NNCTGTTAACTANN	NNGTATTAACCANN	NNAGGGTTAAGANN	NNATCCTTAACANN	NNCTGTTAAGANN	NNATGTGTTATANN
	>1_TTT_RTVAA.118.98	>2_TTT_RTVSA.118.98	>4_TTC_VRVSA.121.98	>5_TTC_TRVAA.197.98	>6_TTA_VRVAA.274.98	>7_TTA_RVLRA.323.98	>8_TGT_RVVSQ.246.98	>9_TGG_KTTQD.255.98	>10_TGG_KSVMQ.164.98	>11_TGA_KSVAQ.249.98	>12_TGA_RGVAA.248.98	>13_TCT_ATVKA.334.98	>14_TCG_KGTQM.124.98	>15_TCC_RMIKS.169.98	>17_TAT_TRVSA.99.98	>18_TAG_RLTQA.202.98	>19_TAG_RMVSA.116.98	>20_TAC_QRVSA.141.98	>21_TAC_ERVSV.190.98	>22_TAA_RITAA.166.98	>23_GTT_GTRAY.250.98	>24_GTG_HLIQY.79.98	>25_GTA_YTRQV.218.98	>26_GGT_ALKNM.90.98	>27_GGT_LTKDQ.383.98	>28_GGG_RSKER.626.98	>29_GGC_TLKNQ.365.98	>30_GGA_LAKDQ.300.98	>31_GCT_KITKF.133.98	>32_GCC_VRLKY.100.98	>33_GCA_ALRQQ.98.98	>34_GAT_RTMRY.92.98	>35_GAG_VMRWY.110.98	>36_GAC_ATRRF.172.98	>37_GAA_RFQKF.81.98	>38_CTA_LHYAK.169.98	>39_CTA_IFNAK.136.98	>40_CGG_STRER.71.98	>41_CGC_RVMSR.145.98	>42_CGA_TFYAA.70.98	>43_CCT_MTNGK.286.98	>44_CCT_RGDSK.203.98	>45_CCG_RCYEK.316.98	>46_CCC_RLDSK.94.98	>47_CCA_KMTQK.639.98	>48_CCA_EHNAK.465.98	>49_CAT_LSQSR.249.98	>51_CAG_MSHWR.197.98	>52_CAC_LGMRR.257.98
	NNGATGCTAAACNN	NNCGCATTAGGANN	NNCTAATTAGTANN	NNTAATTAACANN	NNCCTCATTAGCNN	NNGGCTTAATTANN	NNGCGCATTAATNN	NNCCCATTAATNN	NNTACATTAGTGNN	NNTTCATTATGGNN	NNTCGCTAATTANN	NNCGGCTAATCCNN	NNTCAATTAAGGNN	NNGGGATTAACGNN	NNCGTATTAGATNN	NNCCAATTAGTTNN	NNCTCATTATGANN	NNCATATTAGTANN	NNGCATTAACGNN	NNCTTATTAAGANN	NNCTACTTACTANN	NNACATTAAGTGNN	NNCTACTTAAGNN	NNGCGCCTTAATANN	NNTGTGTAAGGANN	NNCCCCTCCATTNN	NNCCGCCTTAACANN	NNGTTCCTTAAANN	NNCGTCTTAAANN	NNGGGATAAGCCNN	NNGTGCTAAGTANN	NNGCGTCTTAAGNN	NNCCTCTCACANN	NNCGTCTTGAAGNN	NNGGCTTAAGAANN	NNACTAGTTAGTNN	NNCCTCGTTATANN	NNACCCGTTAGGNN	NNGTTGTTAACANN	NNGCTCGTTTCANN	NNACAGGTTAAGNN	NNCTGGTTAAGANN	NNTCTGGTTAACNN	NNGCAGGTTATGNN	NNGCTGGTTACCNN	NNGCTAGTTAGCNN	NNTCATGTTAACNN	NNGCCTGTTAGCNN	NNTTGTGTTATGNN
	>1_TTT_RTVAA.117.99	>2_TTT_RTVSA.115.99	>4_TTC_VRVSA.119.99	>5_TTC_TRVAA.191.99	>6_TTA_VRVAA.266.99	>7_TTA_RVLRA.320.99	>8_TGT_RVVSQ.245.99	>9_TGG_KTTQD.252.99	>10_TGG_KSVMQ.164.99	>11_TGA_KSVAQ.248.99	>12_TGA_RGVAA.247.99	>13_TCT_ATVKA.331.99	>14_TCG_KGTQM.123.99	>15_TCC_RMIKS.156.99	>17_TAT_TRVSA.99.99	>18_TAG_RLTQA.202.99	>19_TAG_RMVSA.112.99	>20_TAC_QRVSA.140.99	>21_TAC_ERVSV.188.99	>22_TAA_RITAA.164.99	>23_GTT_GTRAY.244.99	>24_GTG_HLIQY.79.99	>25_GTA_YTRQV.216.99	>26_GGT_ALKNM.89.99	>27_GGT_LTKDQ.369.99	>28_GGG_RSKER.620.99	>29_GGC_TLKNQ.363.99	>30_GGA_LAKDQ.297.99	>31_GCT_KITKF.133.99	>32_GCC_VRLKY.99.99	>33_GCA_ALRQQ.97.99	>34_GAT_RTMRY.88.99	>35_GAG_VMRWY.108.99	>36_GAC_ATRRF.171.99	>37_GAA_RFQKF.78.99	>38_CTA_LHYAK.169.99	>39_CTA_IFNAK.136.99	>40_CGG_STRER.69.99	>41_CGC_RVMSR.143.99	>42_CGA_TFYAA.65.99	>43_CCT_MTNGK.286.99	>44_CCT_RGDSK.203.99	>45_CCG_RCYEK.313.99	>46_CCC_RLDSK.89.99	>47_CCA_KMTQK.638.99	>48_CCA_EHNAK.464.99	>49_CAT_LSQSR.247.99	>51_CAG_MSHWR.196.99	>52_CAC_LGMRR.255.99
	NNCTAATTATGCNN	NNCGCATTAAGCNN	NNTCGTATTATCNN	NNCCACTAATTANN	NNCTCATTAGAGNN	NNGTAATTAATGNN	NNTCCACTAATGNN	NNCCCATTAGGTNN	NNCGCATTAGTANN	NNGTAATTAGTANN	NNCTAATTAGAANN	NNCTACTAATCCNN	NNGCCCATTAGTNN	NNCCACTAATCCNN	NNCGTATTAATTNN	NNTCAATTAACANN	NNTTCATTAGTGNN	NNGCATTAACANN	NNCGTATTACGCNN	NNTCATTAAGTNN	NNTACATAAGTANN	NNGACGTAAGTGNN	NNCTACTTAGTTNN	NNGCACCTTAAGANN	NNCTCCTTATTANN	NNCCCCCTCAACNN	NNCGCCTTTAAGNN	NNCTCCTTAGCTNN	NNCGGCTTTAAGNN	NNCGATTAAGCCNN	NNCTTGTAAGTANN	NNTGTCTTAACGNN	NNGCCTCTTTAANN	NNCGTCTCATGANN	NNAGTTCTTACANN	NNGGTAGTTATCNN	NNCCTAGTTAGANN	NNTTTCAAGTCANN	NNCTTGTTAATGNN	NNAACTCGTTAANN	NNCTGGTTAAGNN	NNCGGGTTACAANN	NNTGGTTAGTCNN	NNACGGGTTTAANN	NNATGTTAACCANN	NNTCTGGTTATCNN	NNGCTCTTAACANN	NNCCCTGTCAAGNN	NNTGTGTTAACCNN
	>1_TTT_RTVAA.117.100	>2_TTT_RTVSA.112.100	>4_TTC_VRVSA.117.100	>5_TTC_TRVAA.190.100	>6_TTA_VRVAA.265.100	>7_TTA_RVLRA.319.100	>8_TGT_RVVSQ.245.100	>9_TGG_KTTQD.251.100	>10_TGG_KSVMQ.163.100	>11_TGA_KSVAQ.248.100	>12_TGA_RGVAA.245.100	>13_TCT_ATVKA.328.100	>14_TCG_KGTQM.120.100	>15_TCC_RMIKS.153.100	>17_TAT_TRVSA.97.100	>18_TAG_RLTQA.199.100	>19_TAG_RMVSA.111.100	>20_TAC_QRVSA.135.100	>21_TAC_ERVSV.184.100	>22_TAA_RITAA.162.100	>23_GTT_GTRAY.239.100	>24_GTG_HLIQY.79.100	>25_GTA_YTRQV.215.100	>26_GGT_ALKNM.87.100	>27_GGT_LTKDQ.369.100	>28_GGG_RSKER.620.100	>29_GGC_TLKNQ.361.100	>30_GGA_LAKDQ.296.100	>31_GCT_KITKF.124.100	>32_GCC_VRLKY.98.100	>33_GCA_ALRQQ.96.100	>34_GAT_RTMRY.86.100	>35_GAG_VMRWY.108.100	>36_GAC_ATRRF.171.100	>37_GAA_RFQKF.76.100	>38_CTA_LHYAK.167.100	>39_CTA_IFNAK.129.100	>40_CGG_STRER.67.100	>41_CGC_RVMSR.142.100	>42_CGA_TFYAA.65.100	>43_CCT_MTNGK.284.100	>44_CCT_RGDSK.197.100	>45_CCG_RCYEK.311.100	>46_CCC_RLDSK.88.100	>47_CCA_KMTQK.622.100	>48_CCA_EHNAK.462.100	>49_CAT_LSQSR.243.100	>51_CAG_MSHWR.195.100	>52_CAC_LGMRR.255.100
	NNCTTATTAATTNN	NNATCCTTAATANN	NNCATATTAGGGNN	NNCTCATAATTANN	NNCTAATTACTCNN	NNGCATAATTANN	NNGATGCTAATGNN	NNGTCCATTAGCNN	NNCACATTAACANN	NNTCATTATGANN	NNCTAATTATANN	NNGTTTTAATCCNN	NNAGGGGAACACNN	NNAATTTAATCCNN	NNTCCATGCGTGNN	NNCAATTAGCGNN	NNCCCATTAATGNN	NNACCGCGCTAANN	NNTGTATTAATCNN	NNCTCATTATGANN	NNACTTTAAGTANN	NNGGTAAAGCATNN	NNCTACTTACAGNN	NNGCGCCTTATTNN	NNTCCTTAGTGNN	NNTCCCTCAAGGNN	NNCGCCTTAGGNN	NNCTTCCTTATGNN	NNCTCCTTAAGCNN	NNGTGTCTTAACNN	NNGTCTAAGTANN	NNTGTCTTAATGNN	NNCCTCTTGAGGNN	NNGCGTCTTACGNN	NNCCTTCTTACANN	NNCCTAGTTACGNN	NNCTAGTTAGTNN	NNTCCGTTAAANN	NNTGCGTTAACGNN	NNACTCGTTAATANN	NNGTAGGTTAAANN	NNCGGGTTAGCGNN	NNTCGGTTAAGCNN	NNCGGGTTACAANN	NNCTGGTTAAGANN	NNTAGTTAAACNN	NNAGTCTTAACANN	NNCTGTTTTGANN	NNATGTGTTATCNN
	>1_TTT_RTVAA.117.101	>2_TTT_RTVSA.111.101	>4_TTC_VRVSA.116.101	>5_TTC_TRVAA.190.101	>6_TTA_VRVAA.262.101	>7_TTA_RVLRA.318.101	>8_TGT_RVVSQ.240.101	>9_TGG_KTTQD.251.101	>10_TGG_KSVMQ.160.101	>11_TGA_KSVAQ.248.101	>12_TGA_RGVAA.242.101	>13_TCT_ATVKA.325.101	>14_TCG_KGTQM.119.101	>15_TCC_RMIKS.152.101	>17_TAT_TRVSA.97.101	>18_TAG_RLTQA.186.101	>19_TAG_RMVSA.109.101	>20_TAC_QRVSA.135.101	>21_TAC_ERVSV.182.101	>22_TAA_RITAA.162.101	>23_GTT_GTRAY.232.101	>24_GTG_HLIQY.78.101	>25_GTA_YTRQV.213.101	>26_GGT_ALKNM.87.101	>27_GGT_LTKDQ.369.101	>28_GGG_RSKER.615.101	>29_GGC_TLKNQ.361.101	>30_GGA_LAKDQ.292.101	>31_GCT_KITKF.121.101	>32_GCC_VRLKY.98.101	>33_GCA_ALRQQ.96.101	>34_GAT_RTMRY.85.101	>35_GAG_VMRWY.107.101	>36_GAC_ATRRF.171.101	>37_GAA_RFQKF.76.101	>38_CTA_LHYAK.163.101	>39_CTA_IFNAK.128.101	>40_CGG_STRER.67.101	>41_CGC_RVMSR.142.101	>42_CGA_TFYAA.64.101	>43_CCT_MTNGK.282.101	>44_CCT_RGDSK.191.101	>45_CCG_RCYEK.306.101	>46_CCC_RLDSK.87.101	>47_CCA_KMTQK.618.101	>48_CCA_EHNAK.460.101	>49_CAT_LSQSR.243.101	>51_CAG_MSHWR.194.101	>52_CAC_LGMRR.253.101
	NNCCTCATTAAANN	NNGCCACTAATGNN	NNACGTATTAAGNN	NNTCTAATTAAANN	NNCCTTATTAACNN	NNTCTCTAATTANN	NNCCCGTTAATGNN	NNGTCCATTAGTGNN	NNTTCATTAACANN	NNTTCATTAAANN	NNTTAATTAAAGNN	NNCGGATTATTCNN	NNATCAATTAAGNN	NNTGGATTAGGANN	NNCTAATTAGCGNN	NNTCAATTAAGTNN	NNGTTGCTAATGNN	NNCGCATTATAGNN	NNCCGCATTAGCANN	NNTCTCATTAACNN	NNAAGCTAAGTANN	NNCTGTTAAGTGNN	NNAATGTAAGTANN	NNGCTAATTAATNN	NNTTCCTTAGAANN	NNCCCCTTCAAGNN	NNCACCTTAGGANN	NNTGTGTAAGGANN	NNCGGCTTAAGCCNN	NNTGGCTTAGTANN	NNCAATTAAGTANN	NNCCGTCTTAAGNN	NNCCCTCTTATGANN	NNCGTCTTAGTANN	NNGCCTTAAGAANN	NNGCTAGTCAAANN	NNACTAGTTAGCANN	NNATTCCGCTCTNN	NNGGCGTTAACANN	NNGCGGGTTAACNN	NNAGAGGTTAACNN	NNGCAGGTTATGNN	NNGCCGGTTATCNN	NNGCGGGTTTCANN	NNGGTGGTTAAGNN	NNTCTGGTTACANN	NNGGCGTTAACANN	NNCCTGTTACTGNN	NNTGTGTTAACTNN
	>1_TTT_RTVAA.115.102	>2_TTT_RTVSA.111.102	>4_TTC_VRVSA.115.102	>5_TTC_TRVAA.187.102	>6_TTA_VRVAA.259.102	>7_TTA_RVLRA.313.102	>8_TGT_RVVSQ.239.102	>9_TGG_KTTQD.251.102	>10_TGG_KSVMQ.159.102	>11_TGA_KSVAQ.241.102	>12_TGA_RGVAA.242.102	>13_TCT_ATVKA.325.102	>14_TCG_KGTQM.118.102	>15_TCC_RMIKS.151.102	>17_TAT_TRVSA.96.102	>18_TAG_RLTQA.183.102	>19_TAG_RMVSA.109.102	>20_TAC_QRVSA.133.102	>21_TAC_ERVSV.181.102	>22_TAA_RITAA.161.102	>23_GTT_GTRAY.230.102	>24_GTG_HLIQY.77.102	>25_GTA_YTRQV.209.102	>26_GGT_ALKNM.86.102	>27_GGT_LTKDQ.359.102	>28_GGG_RSKER.603.102	>29_GGC_TLKNQ.358.102	>30_GGA_LAKDQ.290.102	>31_GCT_KITKF.121.102	>32_GCC_VRLKY.96.102	>33_GCA_ALRQQ.95.102	>34_GAT_RTMRY.83.102	>35_GAG_VMRWY.107.102	>36_GAC_ATRRF.167.102	>37_GAA_RFQKF.75.102	>38_CTA_LHYAK.159.102	>39_CTA_IFNAK.125.102	>40_CGG_STRER.67.102	>41_CGC_RVMSR.141.102	>42_CGA_TFYAA.64.102	>43_CCT_MTNGK.269.102	>44_CCT_RGDSK.189.102	>45_CCG_RCYEK.305.102	>46_CCC_RLDSK.85.102	>47_CCA_KMTQK.617.102	>48_CCA_EHNAK.458.102	>49_CAT_LSQSR.242.102	>51_CAG_MSHWR.190.102	>52_CAC_LGMRR.248.102
	NNTCTAATTAAANN	NNACATTAATANN	NNTTAATTAGTGNN	NNTGATTAATTANN	NNCTAATTAAANN	NNGTGATAATTANN	NNCAGCTTAATGNN	NNTCACGCCGAGNN	NNTCCATTAGCGNN	NNCTAATTAGACNN	NNATCAGTCCTTNN	NNACTCTAATCCNN	NNCCACTAATGGNN	NNTCTTTAATCCNN	NNCGCATTAGGGNN	NNCCCAATTAATNN	NNCTCGTTAATANN	NNTTATGAAATANN	NNCCGTATTATCNN	NNTCTAATTATCNN	NNACCGTAAGTANN	NNCCACTTATGANN	NNGTCATAAGTANN	NNCACCTTAGTGNN	NNTTCCTTATGANN	NNTCCCTTAATCNN	NNCGCCTTAATANN	NNCTCCTTTAAANN	NNCAGCTTAAGTNN	NNCGTCTTAAGANN	NNAGTTTAAGTANN	NNCGTCTTATACNN	NNCCTCTTACAANN	NNCGTCTCACAGNN	NNGGTACTTATCNN	NNCTCGTCAAGNN	NNTCTCGTTAATNN	NNCCGTTAATGNN	NNCATGTTAGTANN	NNGCTCGTTTATNN	NNATTAGTTAAANN	NNTCGGGTTATTNN	NNTCGGTTAACCNN	NNGTCCAGAGTGNN	NNCTAGTTAAAGNN	NNGTTTTAACCANN	NNCCGTGTTACANN	NNTGTTAAAAGNN	NNGTGTGTTGAGNN
	>1_TTT_RTVAA.114.103	>2_TTT_RTVSA.111.103	>4_TTC_VRVSA.114.103	>5_TTC_TRVAA.186.103	>6_TTA_VRVAA.254.103	>7_TTA_RVLRA.311.103	>8_TGT_RVVSQ.237.103	>9_TGG_KTTQD.250.103	>10_TGG_KSVMQ.158.103	>11_TGA_KSVAQ.240.103	>12_TGA_RGVAA.238.103	>13_TCT_ATVKA.323.103	>14_TCG_KGTQM.116.103	>15_TCC_RMIKS.150.103	>17_TAT_TRVSA.95.103	>18_TAG_RLTQA.179.103	>19_TAG_RMVSA.108.103	>20_TAC_QRVSA.133.103	>21_TAC_ERVSV.179.103	>22_TAA_RITAA.160.103	>23_GTT_GTRAY.224.103	>24_GTG_HLIQY.77.103	>25_GTA_YTRQV.206.103	>26_GGT_ALKNM.86.103	>27_GGT_LTKDQ.356.103	>28_GGG_RSKER.591.103	>29_GGC_TLKNQ.356.103	>30_GGA_LAKDQ.288.103	>31_GCT_KITKF.120.103	>32_GCC_VRLKY.96.103	>33_GCA_ALRQQ.95.103	>34_GAT_RTMRY.82.103	>35_GAG_VMRWY.106.103	>36_GAC_ATRRF.164.103	>37_GAA_RFQKF.74.103	>38_CTA_LHYAK.157.103	>39_CTA_IFNAK.125.103	>40_CGG_STRER.66.103	>41_CGC_RVMSR.141.103	>42_CGA_TFYAA.63.103	>43_CCT_MTNGK.266.103	>44_CCT_RGDSK.184.103	>45_CCG_RCYEK.302.103	>46_CCC_RLDSK.85.103	>47_CCA_KMTQK.612.103	>48_CCA_EHNAK.454.103	>49_CAT_LSQSR.242.103	>51_CAG_MSHWR.189.103	>52_CAC_LGMRR.243.103
	NNTCTCATTAACNN	NNTTCACTAATGNN	NNCGCATTAGGGNN	NNACGTTAATTANN	NNACTAATTAAGNN	NNTGTGTAATTANN	NNTGCGATAATGNN	NNTCCCATTATCNN	NNTACATTAGCGNN	NNCTCATTAGAANN	NNCCTAATTAAANN	NNCGGATTAAGNN	NNCCCATTAGGTNN	NNGAGGATTAACNN	NNCTAATTAGTANN	NNCTAATTAGTANN	NNCTCATTATTANN	NNTGTATTAGTGNN	NNCGCATTATGTNN	NNCCTCATTAAANN	NNCCTACTTATCNN	NNCAGTTAAGTGNN	NNATCCTAAGTANN	NNCCACCTTAGANN	NNTTCCTTAAGNN	NNTCCCTTAACGNN	NNCGCCTTACANN	NNTGCGCATCGANN	NNCGGCTTAGGTNN	NNTCGCTAAGACNN	NNTACTTAAGTANN	NNCTTCTTAGTANN	NNCCTCTTAATGNN	NNCGTCTCAGATNN	NNGCTACTTATANN	NNGATGGTTAACNN	NNACTCGTTATANN	NNTCCGTTAGTCNN	NNATTGTTAACANN	NNTCGTTAAACNN	NNGCTGGTTAAANN	NNCCGGGTTACGNN	NNTCGGTTAGAANN	NNCGGGTTAACNN	NNGTGTTAACTANN	NNGATAGTTAACNN	NNAGCGTTAACANN	NNCCTGTTAATCNN	NNTGTGTTAAAGNN
	>1_TTT_RTVAA.114.104	>2_TTT_RTVSA.109.104	>4_TTC_VRVSA.113.104	>5_TTC_TRVAA.185.104	>6_TTA_VRVAA.252.104	>7_TTA_RVLRA.310.104	>8_TGT_RVVSQ.237.104	>9_TGG_KTTQD.249.104	>10_TGG_KSVMQ.156.104	>11_TGA_KSVAQ.239.104	>12_TGA_RGVAA.235.104	>13_TCT_ATVKA.320.104	>14_TCG_KGTQM.114.104	>15_TCC_RMIKS.150.104	>17_TAT_TRVSA.93.104	>18_TAG_RLTQA.178.104	>19_TAG_RMVSA.108.104	>20_TAC_QRVSA.132.104	>21_TAC_ERVSV.177.104	>22_TAA_RITAA.159.104	>23_GTT_GTRAY.223.104	>24_GTG_HLIQY.76.104	>25_GTA_YTRQV.205.104	>26_GGT_ALKNM.86.104	>27_GGT_LTKDQ.348.104	>28_GGG_RSKER.579.104	>29_GGC_TLKNQ.353.104	>30_GGA_LAKDQ.284.104	>31_GCT_KITKF.120.104	>32_GCC_VRLKY.94.104	>33_GCA_ALRQQ.94.104	>34_GAT_RTMRY.82.104	>35_GAG_VMRWY.106.104	>36_GAC_ATRRF.163.104	>37_GAA_RFQKF.73.104	>38_CTA_LHYAK.154.104	>39_CTA_IFNAK.120.104	>40_CGG_STRER.66.104	>41_CGC_RVMSR.139.104	>42_CGA_TFYAA.63.104	>43_CCT_MTNGK.265.104	>44_CCT_RGDSK.178.104	>45_CCG_RCYEK.300.104	>46_CCC_RLDSK.85.104	>47_CCA_KMTQK.608.104	>48_CCA_EHNAK.445.104	>49_CAT_LSQSR.233.104	>51_CAG_MSHWR.181.104	>52_CAC_LGMRR.235.104
	NNCTTCATTAAANN	NNCTCATTAAANN	NNCGTATTACGTNN	NNTTAATTAGTGNN	NNCTAATTATAANN	NNGCGGTAATTANN	NNGGCACTAATGNN	NNTCCATTAGCGNN	NNCGGAACGTGGNN	NNTCGTTAATGANN	NNCCTAATTAAGNN	NNAGACTAATCCNN	NNGTCCAGATTANN	NNGGATTAATCCNN	NNCATATTAGTGNN	NNCCAATTAAATNN	NNTTCATTAATGNN	NNCTTGTTAATANN	NNCACATTAGCANN	NNACTAATTAAGNN	NNCCTACTTAACNN	NNCCACTTAACTNN	NNTACCTAAGTANN	NNCCGCCTTAACANN	NNTTCCTAAGGANN	NNCTCCCTCAAANN	NNCGCCTTAGTNN	NNTTCCTTACGTNN	NNGGCTTATCANN	NNTATCTAAGCCNN	NNACCGTAAGTANN	NNCGTCTTACGNN	NNGCCTCTCAAANN	NNGCGTCTCAAGNN	NNACTTCTTATANN	NNCCTAGTTATCNN	NNACTAGTTAGCNN	NNCTCCGTTATANN	NNCCGTGTTAAANN	NNCCTCGTTACGNN	NNGCGGGTTAACNN	NNCCCGGTTATGNN	NNCCGGTTAGGGNN	NNCGGGTTATAGNN	NNGTACTAACTANN	NNCTAGTTAATTNN	NNTTGTTTAACANN	NNCCTGTTAGTCNN	NNCGTGTCAATGNN
	>1_TTT_RTVAA.114.105	>2_TTT_RTVSA.107.105	>4_TTC_VRVSA.111.105	>5_TTC_TRVAA.180.105	>6_TTA_VRVAA.252.105	>7_TTA_RVLRA.309.105	>8_TGT_RVVSQ.232.105	>9_TGG_KTTQD.244.105	>10_TGG_KSVMQ.155.105	>11_TGA_KSVAQ.239.105	>12_TGA_RGVAA.233.105	>13_TCT_ATVKA.319.105	>14_TCG_KGTQM.111.105	>15_TCC_RMIKS.148.105	>17_TAT_TRVSA.93.105	>18_TAG_RLTQA.178.105	>19_TAG_RMVSA.107.105	>20_TAC_QRVSA.131.105	>21_TAC_ERVSV.171.105	>22_TAA_RITAA.157.105	>23_GTT_GTRAY.220.105	>24_GTG_HLIQY.76.105	>25_GTA_YTRQV.201.105	>26_GGT_ALKNM.83.105	>27_GGT_LTKDQ.342.105	>28_GGG_RSKER.567.105	>29_GGC_TLKNQ.350.105	>30_GGA_LAKDQ.278.105	>31_GCT_KITKF.120.105	>32_GCC_VRLKY.93.105	>33_GCA_ALRQQ.94.105	>34_GAT_RTMRY.82.105	>35_GAG_VMRWY.105.105	>36_GAC_ATRRF.159.105	>37_GAA_RFQKF.72.105	>38_CTA_LHYAK.144.105	>39_CTA_IFNAK.120.105	>40_CGG_STRER.66.105	>41_CGC_RVMSR.139.105	>42_CGA_TFYAA.61.105	>43_CCT_MTNGK.259.105	>44_CCT_RGDSK.175.105	>45_CCG_RCYEK.299.105	>46_CCC_RLDSK.84.105	>47_CCA_KMTQK.606.105	>48_CCA_EHNAK.444.105	>49_CAT_LSQSR.230.105	>51_CAG_MSHWR.178.105	>52_CAC_LGMRR.232.105
	NNTTCATTAAGANN	NNTAATTAACANN	NNTGTATTAGTGNN	NNCGCCTAATTANN	NNGCTAATTAGANN	NNTTCATTAAGANN	NNGCTCATTAAGNN	NNCCCATTAATCNN	NNGCGCTAATGANN	NNACTCATTAGTNN	NNCCTCATTAAANN	NNGGGCTAATCCNN	NNCCCCATTAATANN	NNTGGATAATCCNN	NNCGTATTAGAGNN	NNGCCAATTACANN	NNGGTAAAGCATNN	NNTGCGTTAATANN	NNCGTATTATCNN	NNCTCATTACGANN	NNCTACTTACCANN	NNCCACTTACCANN	NNACCGTAAGTANN	NNGTCCAGCTTGNN	NNGCTCCTTATCNN	NNGACTTAAGGGNN	NNGCGCCTTAAACNN	NNTTCCTTATAGNN	NNCGGCTTAGCANN	NNGTACTAAGCCNN	NNGATTTAAGTANN	NNCTTCTTAGAGNN	NNACCTCTTAAANN	NNCCGTCTTAACNN	NNCTTCTTATAGNN	NNCCTAGTTAAACNN	NNGCTAGTTAGTGNN	NNCCGTTAACGNN	NNTCTGCTAACANN	NNGCTTGTTAAANN	NNGTTCGTTAAGNN	NNGCGTTATTGNN	NNTTCGGTTAGTNN	NNTTTCTAACCANN	NNTGTTTAACCANN	NNCTGGTTAAGANN	NNCGACTTAACANN	NNCCTGTTTACTNN	NNCGTGTTAGGANN
	>1_TTT_RTVAA.112.106	>2_TTT_RTVSA.107.106	>4_TTC_VRVSA.111.106	>5_TTC_TRVAA.180.106	>6_TTA_VRVAA.251.106	>7_TTA_RVLRA.309.106	>8_TGT_RVVSQ.231.106	>9_TGG_KTTQD.242.106	>10_TGG_KSVMQ.153.106	>11_TGA_KSVAQ.234.106	>12_TGA_RGVAA.233.106	>13_TCT_ATVKA.313.106	>14_TCG_KGTQM.109.106	>15_TCC_RMIKS.144.106	>17_TAT_TRVSA.93.106	>18_TAG_RLTQA.178.106	>19_TAG_RMVSA.105.106	>20_TAC_QRVSA.130.106	>21_TAC_ERVSV.168.106	>22_TAA_RITAA.153.106	>23_GTT_GTRAY.220.106	>24_GTG_HLIQY.76.106	>25_GTA_YTRQV.200.106	>26_GGT_ALKNM.83.106	>27_GGT_LTKDQ.340.106	>28_GGG_RSKER.558.106	>29_GGC_TLKNQ.337.106	>30_GGA_LAKDQ.277.106	>31_GCT_KITKF.119.106	>32_GCC_VRLKY.92.106	>33_GCA_ALRQQ.93.106	>34_GAT_RTMRY.82.106	>35_GAG_VMRWY.105.106	>36_GAC_ATRRF.158.106	>37_GAA_RFQKF.71.106	>38_CTA_LHYAK.143.106	>39_CTA_IFNAK.119.106	>40_CGG_STRER.64.106	>41_CGC_RVMSR.136.106	>42_CGA_TFYAA.61.106	>43_CCT_MTNGK.258.106	>44_CCT_RGDSK.169.106	>45_CCG_RCYEK.295.106	>46_CCC_RLDSK.84.106	>47_CCA_KMTQK.605.106	>48_CCA_EHNAK.439.106	>49_CAT_LSQSR.227.106	>51_CAG_MSHWR.174.106	>52_CAC_LGMRR.231.106
	NNCTCATTATAGNN	NNCTTCTTAATANN	NNGTTCTTAATANN	NNCCCCTAATTANN	NNCTAATTACATNN	NNTGCCTAATTANN	NNTCGCATTAGTNN	NNCCCATTAGANN	NNATCCATTAAGNN	NNGCTCATTACANN	NNTCATTAAGTNN	NNCGGTTAATCCNN	NNCCCATTATTANN	NNGTTTAATCCNN	NNGCGTATTATANN	NNGTCAATTAAANN	NNCACATTAAAANN	NNTTACTTAATANN	NNCCGTATTAGANN	NNCGCATTAGTGNN	NNGCTACTTAAGNN	NNCGGCTAAGTGNN	NNGCTACTTATCNN	NNGCCTTAAAANN	NNCCTCCTTAAAGNN	NNCCCCCTTAGANN	NNCCGCCTTACANN	NNTTCCTTAGACNN	NNACGTTAAGCCNN	NNTGGTTAAGAANN	NNCTCATAAGTANN	NNCTTCTTAGGANN	NNACCTCTTAATNN	NNCGTCTCAACANN	NNCATTCTGCGANN	NNCTAGTTAGGANN	NNGCTAGTTAGCANN	NNTATACACGAANN	NNGCGTGTTAGGNN	NNCCTCGTTTAANN	NNTCGGTTAACANN	NNCCGCGTTATTGNN	NNCTGGTTAAGTNN	NNTAGGAAACGGNN	NNTGACTAACTANN	NNCTAGTTAACCNN	NNGCTATTAACANN	NNTCCTGTTAGANN	NNCGTGTTAGCANN
	>1_TTT_RTVAA.112.107	>2_TTT_RTVSA.106.107	>4_TTC_VRVSA.110.107	>5_TTC_TRVAA.179.107	>6_TTA_VRVAA.250.107	>7_TTA_RVLRA.308.107	>8_TGT_RVVSQ.230.107	>9_TGG_KTTQD.240.107	>10_TGG_KSVMQ.153.107	>11_TGA_KSVAQ.231.107	>12_TGA_RGVAA.230.107	>13_TCT_ATVKA.310.107	>14_TCG_KGTQM.107.107	>15_TCC_RMIKS.144.107	>17_TAT_TRVSA.88.107	>18_TAG_RLTQA.178.107	>19_TAG_RMVSA.105.107	>20_TAC_QRVSA.129.107	>21_TAC_ERVSV.167.107	>22_TAA_RITAA.151.107	>23_GTT_GTRAY.215.107	>24_GTG_HLIQY.76.107	>25_GTA_YTRQV.200.107	>26_GGT_ALKNM.83.107	>27_GGT_LTKDQ.340.107	>28_GGG_RSKER.555.107	>29_GGC_TLKNQ.332.107	>30_GGA_LAKDQ.276.107	>31_GCT_KITKF.118.107	>32_GCC_VRLKY.92.107	>33_GCA_ALRQQ.93.107	>34_GAT_RTMRY.81.107	>35_GAG_VMRWY.103.107	>36_GAC_ATRRF.157.107	>37_GAA_RFQKF.71.107	>38_CTA_LHYAK.142.107	>39_CTA_IFNAK.118.107	>40_CGG_STRER.62.107	>41_CGC_RVMSR.135.107	>42_CGA_TFYAA.58.107	>43_CCT_MTNGK.252.107	>44_CCT_RGDSK.166.107	>45_CCG_RCYEK.288.107	>46_CCC_RLDSK.80.107	>47_CCA_KMTQK.598.107	>48_CCA_EHNAK.438.107	>49_CAT_LSQSR.227.107	>51_CAG_MSHWR.173.107	>52_CAC_LGMRR.227.107
	NNCTTATTAATANN	NNGCATTAGCGNN	NNCGTGTTAATGNN	NNTCATTAGTGNN	NNCTCATTATCNN	NNAACATAATTANN	NNTTTACTAATGNN	NNGCCCATTAATGNN	NNCTCATTACGANN	NNGTTCATTAGTNN	NNTTCATTAATTNN	NNGGGGATTAAANN	NNCCCATTAAANN	NNCGGATTATTGNN	NNTCATTAGTGNN	NNTCAATTAAGCNN	NNCACATTAATTNN	NNACGTATTAAGNN	NNCGTATTAGANN	NNCTCATTATCANN	NNAGTTCTTAAGNN	NNCCACTTATACNN	NNCTACTTAGATNN	NNGCCTCACCGNN	NNTTCCTTAATTNN	NNACTTTAAGGGNN	NNCACCTTAGTGNN	NNCTCCTTTGTANN	NNCAGCTTAAAANN	NNCGCTAAGCCNN	NNGCGATAAGTANN	NNCTTCTTAATGNN	NNCCTCTCAAAANN	NNCGTCTTTAAANN	NNCTTCTTAAANN	NNCTAGTTAGANN	NNTCTAGTTATANN	NNTCCCGTTAAGNN	NNCGTGTTAAGGNN	NNCTTGTTAGTGNN	NNAAAGGTTAATNN	NNTTTCCATCACNN	NNTTCGGTTAAGNN	NNCCATGTTAATNN	NNGCGTTAACTANN	NNTTCTTAACCANN	NNCCTGTTAACANN	NNCTGTTTTGGNN	NNTCGTGTTACANN
	>1_TTT_RTVAA.112.108	>2_TTT_RTVSA.105.108	>4_TTC_VRVSA.110.108	>5_TTC_TRVAA.178.108	>6_TTA_VRVAA.248.108	>7_TTA_RVLRA.306.108	>8_TGT_RVVSQ.229.108	>9_TGG_KTTQD.235.108	>10_TGG_KSVMQ.152.108	>11_TGA_KSVAQ.230.108	>12_TGA_RGVAA.225.108	>13_TCT_ATVKA.308.108	>14_TCG_KGTQM.102.108	>15_TCC_RMIKS.144.108	>17_TAT_TRVSA.86.108	>18_TAG_RLTQA.176.108	>19_TAG_RMVSA.105.108	>20_TAC_QRVSA.128.108	>21_TAC_ERVSV.164.108	>22_TAA_RITAA.150.108	>23_GTT_GTRAY.212.108	>24_GTG_HLIQY.75.108	>25_GTA_YTRQV.200.108	>26_GGT_ALKNM.82.108	>27_GGT_LTKDQ.335.108	>28_GGG_RSKER.546.108	>29_GGC_TLKNQ.331.108	>30_GGA_LAKDQ.276.108	>31_GCT_KITKF.118.108	>32_GCC_VRLKY.92.108	>33_GCA_ALRQQ.92.108	>34_GAT_RTMRY.81.108	>35_GAG_VMRWY.103.108	>36_GAC_ATRRF.157.108	>37_GAA_RFQKF.69.108	>38_CTA_LHYAK.140.108	>39_CTA_IFNAK.117.108	>40_CGG_STRER.61.108	>41_CGC_RVMSR.134.108	>42_CGA_TFYAA.57.108	>43_CCT_MTNGK.250.108	>44_CCT_RGDSK.164.108	>45_CCG_RCYEK.282.108	>46_CCC_RLDSK.78.108	>47_CCA_KMTQK.595.108	>48_CCA_EHNAK.410.108	>49_CAT_LSQSR.225.108	>51_CAG_MSHWR.171.108	>52_CAC_LGMRR.222.108
	NNCTAATTAGGNN	NNCTTATTAACCNN	NNTGCATTAAGGNN	NNCTAATTAATCNN	NNTAATTAACANN	NNCTAATTAATANN	NNGCCGCTAATGNN	NNGCCCATTAAGANN	NNCTAATTAGCANN	NNATTCATTAGANN	NNTAATTAACGNN	NNATCAGTCCTTNN	NNCCAATTAGCGNN	NNCAGGATTAACNN	NNCGTATTATTGNN	NNCCTATTAGCANN	NNGCACATTAAGNN	NNCGTATTATCGNN	NNTGTATTATGANN	NNCTAATTAATTNN	NNCTACTTATACNN	NNTGTCTTCGATNN	NNAAGCTAAGTANN	NNCACCTTAGAGNN	NNCCTCCTTAACANN	NNCCCCTCAAANN	NNCGCCTTTAGANN	NNCTCCTCATGGNN	NNCTTCTTAACGNN	NNCGTCTTAAGGNN	NNGCACTAAGTANN	NNCGTCTTATCGNN	NNCCTCTCACAANN	NNCGTCTTAATCNN	NNGAGTTAAGAANN	NNATGCTATCTTNN	NNCCTAGTTAAGANN	NNTTCCGTTATANN	NNAGCGTTAACANN	NNGCTCGTTAATANN	NNGTCGGTTATGNN	NNCGGGTTATAGNN	NNTTTGGTTAACNN	NNACGGGTTATCNN	NNGCTAGTCAAGNN	NNCTAGTTATGTNN	NNCTTGTTAATGNN	NNGCCTGTTAGGNN	NNATGTGTTACANN
	>1_TTT_RTVAA.112.109	>2_TTT_RTVSA.105.109	>4_TTC_VRVSA.108.109	>5_TTC_TRVAA.178.109	>6_TTA_VRVAA.246.109	>7_TTA_RVLRA.304.109	>8_TGT_RVVSQ.228.109	>9_TGG_KTTQD.229.109	>10_TGG_KSVMQ.147.109	>11_TGA_KSVAQ.227.109	>12_TGA_RGVAA.224.109	>13_TCT_ATVKA.300.109	>14_TCG_KGTQM.100.109	>15_TCC_RMIKS.140.109	>17_TAT_TRVSA.86.109	>18_TAG_RLTQA.174.109	>19_TAG_RMVSA.105.109	>20_TAC_QRVSA.127.109	>21_TAC_ERVSV.163.109	>22_TAA_RITAA.150.109	>23_GTT_GTRAY.211.109	>24_GTG_HLIQY.74.109	>25_GTA_YTRQV.199.109	>26_GGT_ALKNM.82.109	>27_GGT_LTKDQ.335.109	>28_GGG_RSKER.541.109	>29_GGC_TLKNQ.329.109	>30_GGA_LAKDQ.272.109	>31_GCT_KITKF.116.109	>32_GCC_VRLKY.90.109	>33_GCA_ALRQQ.91.109	>34_GAT_RTMRY.80.109	>35_GAG_VMRWY.103.109	>36_GAC_ATRRF.155.109	>37_GAA_RFQKF.69.109	>38_CTA_LHYAK.140.109	>39_CTA_IFNAK.117.109	>40_CGG_STRER.59.109	>41_CGC_RVMSR.134.109	>42_CGA_TFYAA.55.109	>43_CCT_MTNGK.250.109	>44_CCT_RGDSK.163.109	>45_CCG_RCYEK.275.109	>46_CCC_RLDSK.74.109	>47_CCA_KMTQK.594.109	>48_CCA_EHNAK.390.109	>49_CAT_LSQSR.225.109	>51_CAG_MSHWR.170.109	>52_CAC_LGMRR.221.109
	NNGCTCATTAAANN	NNCGTATTAGAANN	NNGCGCATTAGTNN	NNTCTCTAATTANN	NNCTAATTATGNN	NNTTCATTAATANN	NNGCGCTTAATGNN	NNCCATTAAGTNN	NNTCCATTAGAGNN	NNTCATTAATGNN	NNTCCATTAGTGNN	NNCAGGATTAACNN	NNCCCATTATGCNN	NNGGGATTAGTTNN	NNCTCATTAGTANN	NNCAAATATATTNN	NNCGCATTAAGCNN	NNCGTATTATTGNN	NNTGTATTAACGNN	NNCTAATTACAGNN	NNGACATAAGTANN	NNAGTCTAAGTGNN	NNCTACTTAAAANN	NNCGCCTTAATNN	NNTTCCTTATCANN	NNTCCCTTAACTNN	NNCCGCCTTAGTNN	NNGTTCCTTAACNN	NNGCGTCTTAAGNN	NNCGTCTTAGACNN	NNTTTTTAAGTANN	NNTGTCTTAATANN	NNGCCTCTTAAGNN	NNCGTCTCAGGGNN	NNGCTTCTCAAGNN	NNCTAGTTACGANN	NNGCTAGTTAGTANN	NNGCCCGTTAAANN	NNCTTGTTAATANN	NNCCTCGTTACANN	NNCTGGTTATGANN	NNTTGGGTTAAANN	NNTCGGTTAGCGNN	NNCGGGTTAAGCNN	NNTGCTTAACTANN	NNGGGTTAACCANN	NNAGATTTAACANN	NNCCTGTTATANN	NNGTGTGCTACCNN
	>1_TTT_RTVAA.111.110	>2_TTT_RTVSA.105.110	>4_TTC_VRVSA.107.110	>5_TTC_TRVAA.178.110	>6_TTA_VRVAA.244.110	>7_TTA_RVLRA.301.110	>8_TGT_RVVSQ.226.110	>9_TGG_KTTQD.228.110	>10_TGG_KSVMQ.146.110	>11_TGA_KSVAQ.225.110	>12_TGA_RGVAA.223.110	>13_TCT_ATVKA.299.110	>14_TCG_KGTQM.99.110	>15_TCC_RMIKS.140.110	>17_TAT_TRVSA.84.110	>18_TAG_RLTQA.172.110	>19_TAG_RMVSA.104.110	>20_TAC_QRVSA.127.110	>21_TAC_ERVSV.161.110	>22_TAA_RITAA.146.110	>23_GTT_GTRAY.211.110	>24_GTG_HLIQY.74.110	>25_GTA_YTRQV.198.110	>26_GGT_ALKNM.82.110	>27_GGT_LTKDQ.318.110	>28_GGG_RSKER.539.110	>29_GGC_TLKNQ.322.110	>30_GGA_LAKDQ.272.110	>31_GCT_KITKF.114.110	>32_GCC_VRLKY.90.110	>33_GCA_ALRQQ.89.110	>34_GAT_RTMRY.80.110	>35_GAG_VMRWY.101.110	>36_GAC_ATRRF.151.110	>37_GAA_RFQKF.68.110	>38_CTA_LHYAK.140.110	>39_CTA_IFNAK.116.110	>40_CGG_STRER.59.110	>41_CGC_RVMSR.133.110	>42_CGA_TFYAA.54.110	>43_CCT_MTNGK.249.110	>44_CCT_RGDSK.155.110	>45_CCG_RCYEK.269.110	>46_CCC_RLDSK.72.110	>47_CCA_KMTQK.579.110	>48_CCA_EHNAK.384.110	>49_CAT_LSQSR.225.110	>51_CAG_MSHWR.170.110	>52_CAC_LGMRR.221.110
	NNCTTCATTAAGNN	NNCACATTAATANN	NNGCGTATTAGTNN	NNTTAATTAAGANN	NNCTAATTAGAGNN	NNATTCTAATTANN	NNGCATTAGCGNN	NNGCCCATTAGTANN	NNCCATTAATANN	NNTCATTAGCGNN	NNCTAATTATGCNN	NNGAAAACCGCANN	NNCTAATTAGGGNN	NNCGGATTATTANN	NNTGTATTAGTGNN	NNCTAATTAACCNN	NNCTCATTAGAGNN	NNCGCATTAGTANN	NNCCGCATTAGANN	NNTAATTAACGNN	NNAAGATAAGTANN	NNAGGCTAAGTGNN	NNCTACTTAAANN	NNGCTAATTAACNN	NNGCTCCTTATANN	NNGTCCCTTAAGNN	NNTCGCCTTACCNN	NNCTCCTTTAATNN	NNCAGCTTAGAANN	NNTGCTTAAGACNN	NNCGCCTAAGTANN	NNCGTCTTATCCNN	NNCCTCTTCATANN	NNCGTCTTATCGNN	NNGCTTCTTACGNN	NNCCTAGTTACANN	NNCCTCGTTATCNN	NNCCGTTAAATNN	NNTGTGTTAACGNN	NNCCTCGTTACCNN	NNGCAGGTTAACNN	NNTGGGTTAGTGNN	NNTCGGTTAGAGNN	NNTGTGATATACNN	NNGCTCGTTAAGNN	NNGCTAGTTACGNN	NNTCACTTAACANN	NNATCAGTCCTTNN	NNTGTGTCAAAGNN
	>1_TTT_RTVAA.111.111	>2_TTT_RTVSA.105.111	>4_TTC_VRVSA.107.111	>5_TTC_TRVAA.176.111	>6_TTA_VRVAA.243.111	>7_TTA_RVLRA.299.111	>8_TGT_RVVSQ.226.111	>9_TGG_KTTQD.219.111	>10_TGG_KSVMQ.146.111	>11_TGA_KSVAQ.225.111	>12_TGA_RGVAA.222.111	>13_TCT_ATVKA.296.111	>14_TCG_KGTQM.98.111	>15_TCC_RMIKS.138.111	>17_TAT_TRVSA.84.111	>18_TAG_RLTQA.172.111	>19_TAG_RMVSA.104.111	>20_TAC_QRVSA.126.111	>21_TAC_ERVSV.153.111	>22_TAA_RITAA.143.111	>23_GTT_GTRAY.210.111	>24_GTG_HLIQY.71.111	>25_GTA_YTRQV.198.111	>26_GGT_ALKNM.80.111	>27_GGT_LTKDQ.307.111	>28_GGG_RSKER.531.111	>29_GGC_TLKNQ.321.111	>30_GGA_LAKDQ.268.111	>31_GCT_KITKF.114.111	>32_GCC_VRLKY.90.111	>33_GCA_ALRQQ.89.111	>34_GAT_RTMRY.75.111	>35_GAG_VMRWY.101.111	>36_GAC_ATRRF.149.111	>37_GAA_RFQKF.68.111	>38_CTA_LHYAK.139.111	>39_CTA_IFNAK.116.111	>40_CGG_STRER.59.111	>41_CGC_RVMSR.133.111	>42_CGA_TFYAA.53.111	>43_CCT_MTNGK.245.111	>44_CCT_RGDSK.153.111	>45_CCG_RCYEK.269.111	>46_CCC_RLDSK.70.111	>47_CCA_KMTQK.579.111	>48_CCA_EHNAK.383.111	>49_CAT_LSQSR.221.111	>51_CAG_MSHWR.170.111	>52_CAC_LGMRR.219.111
	NNCTAATTATACNN	NNATCGTTAATANN	NNTAATTAACANN	NNCGATAATTANN	NNCTCATTAACTNN	NNGGTTTAATTANN	NNCACATTATGGNN	NNCCATTAGAGNN	NNCTCATTAGAANN	NNCTAATTAGTANN	NNATCTTATTACNN	NNCGCTAATCCNN	NNGTCCAGATGGNN	NNAGGATTATCANN	NNGTAGCCAATGNN	NNCCAATTACTGNN	NNTCTCTTAATGNN	NNTATATTAATANN	NNGTCCAGATTGNN	NNGTCTTAATTANN	NNAACTTAAGTANN	NNCCCACTTAGTNN	NNTATTTAAGTANN	NNGCGCCTTAAGTNN	NNCCTCCTTAGTANN	NNTCCCTTAGGANN	NNCGCCTTATCNN	NNCTCCTTAGAANN	NNCGGCTTACGTNN	NNTGCATAAGCCNN	NNCTACTTAACTNN	NNCTTCTTAACGNN	NNCCTCTTGAAGNN	NNCGTCTTGAAANN	NNGCCCAGATTGNN	NNCTAGTTAATANN	NNCTAGTTAACCNN	NNCCCCGTTATGNN	NNGTCCTTAACANN	NNCTCGTTATAGNN	NNGCAGGTTAGANN	NNCGGGTTAACNN	NNTCCGGTTAACNN	NNTCAGGTTAAGNN	NNTTGCTAACTANN	NNGCTGGTTTAGNN	NNCCGCTTAACANN	NNTGTTAACAANN	NNGTGTGTTATTNN
	>1_TTT_RTVAA.110.112	>2_TTT_RTVSA.104.112	>4_TTC_VRVSA.106.112	>5_TTC_TRVAA.176.112	>6_TTA_VRVAA.239.112	>7_TTA_RVLRA.296.112	>8_TGT_RVVSQ.224.112	>9_TGG_KTTQD.215.112	>10_TGG_KSVMQ.143.112	>11_TGA_KSVAQ.221.112	>12_TGA_RGVAA.221.112	>13_TCT_ATVKA.296.112	>14_TCG_KGTQM.98.112	>15_TCC_RMIKS.138.112	>17_TAT_TRVSA.84.112	>18_TAG_RLTQA.171.112	>19_TAG_RMVSA.104.112	>20_TAC_QRVSA.124.112	>21_TAC_ERVSV.151.112	>22_TAA_RITAA.142.112	>23_GTT_GTRAY.209.112	>24_GTG_HLIQY.71.112	>25_GTA_YTRQV.197.112	>26_GGT_ALKNM.79.112	>27_GGT_LTKDQ.307.112	>28_GGG_RSKER.511.112	>29_GGC_TLKNQ.313.112	>30_GGA_LAKDQ.264.112	>31_GCT_KITKF.114.112	>32_GCC_VRLKY.90.112	>33_GCA_ALRQQ.89.112	>34_GAT_RTMRY.74.112	>35_GAG_VMRWY.101.112	>36_GAC_ATRRF.148.112	>37_GAA_RFQKF.68.112	>38_CTA_LHYAK.138.112	>39_CTA_IFNAK.115.112	>40_CGG_STRER.57.112	>41_CGC_RVMSR.132.112	>42_CGA_TFYAA.53.112	>43_CCT_MTNGK.239.112	>44_CCT_RGDSK.151.112	>45_CCG_RCYEK.267.112	>46_CCC_RLDSK.68.112	>47_CCA_KMTQK.576.112	>48_CCA_EHNAK.379.112	>49_CAT_LSQSR.218.112	>51_CAG_MSHWR.170.112	>52_CAC_LGMRR.216.112
	NNCTAATTATANN	NNCGTCTTAATANN	NNCCTAATTAAGNN	NNGGGTTAATTANN	NNCTAATCAGAGNN	NNCTGATAATTANN	NNGTTCTTAATGNN	NNCCCCATTAATANN	NNCTAATTAGCGNN	NNTTAATTAAGANN	NNTTAATTAAGCNN	NNCTCCTAATCCNN	NNCCCCATTAAANN	NNGTTTTAATCCNN	NNGCATTAACANN	NNCCTATTAGTGNN	NNAAATTAGCANN	NNCGTATTAAATNN	NNCGTATTACANN	NNTCTAATTAAGNN	NNCCTACTTAAANN	NNCGCTTAAGTANN	NNCTACTTACGTNN	NNCGCCTTAATANN	NNACTCCTTAATNN	NNGCCCCTTAGANN	NNCGCCTTATGGNN	NNTTCCTTAAANN	NNCAGCTTAGCGNN	NNTTTGTAAGCCNN	NNTTTTTGAGTANN	NNCGTCTTACGCNN	NNCCTCTCAGAANN	NNCGTCTCAATNN	NNACCTTAAGAANN	NNGATAGTTAACNN	NNGCTAGTTAAGANN	NNCCCGTTATTGNN	NNGTGCTTAACANN	NNCTCGTTATGCNN	NNTTAGTTAACANN	NNCGGGTTACANN	NNACCGGTTAAGNN	NNGCGGGTTTGTNN	NNGCTAGTTATCNN	NNCTGTTAACCANN	NNTCGTTAACANN	NNCTGTCTAGANN	NNTCGTGTTAAANN
	>1_TTT_RTVAA.108.113	>2_TTT_RTVSA.103.113	>4_TTC_VRVSA.106.113	>5_TTC_TRVAA.175.113	>6_TTA_VRVAA.239.113	>7_TTA_RVLRA.296.113	>8_TGT_RVVSQ.224.113	>9_TGG_KTTQD.210.113	>10_TGG_KSVMQ.142.113	>11_TGA_KSVAQ.217.113	>12_TGA_RGVAA.218.113	>13_TCT_ATVKA.294.113	>14_TCG_KGTQM.98.113	>15_TCC_RMIKS.135.113	>17_TAT_TRVSA.84.113	>18_TAG_RLTQA.167.113	>19_TAG_RMVSA.104.113	>20_TAC_QRVSA.122.113	>21_TAC_ERVSV.150.113	>22_TAA_RITAA.141.113	>23_GTT_GTRAY.209.113	>24_GTG_HLIQY.71.113	>25_GTA_YTRQV.190.113	>26_GGT_ALKNM.77.113	>27_GGT_LTKDQ.302.113	>28_GGG_RSKER.502.113	>29_GGC_TLKNQ.312.113	>30_GGA_LAKDQ.263.113	>31_GCT_KITKF.113.113	>32_GCC_VRLKY.89.113	>33_GCA_ALRQQ.88.113	>34_GAT_RTMRY.74.113	>35_GAG_VMRWY.101.113	>36_GAC_ATRRF.148.113	>37_GAA_RFQKF.66.113	>38_CTA_LHYAK.137.113	>39_CTA_IFNAK.113.113	>40_CGG_STRER.57.113	>41_CGC_RVMSR.131.113	>42_CGA_TFYAA.52.113	>43_CCT_MTNGK.238.113	>44_CCT_RGDSK.151.113	>45_CCG_RCYEK.264.113	>46_CCC_RLDSK.68.113	>47_CCA_KMTQK.576.113	>48_CCA_EHNAK.378.113	>49_CAT_LSQSR.217.113	>51_CAG_MSHWR.169.113	>52_CAC_LGMRR.212.113
	NNGTTCATTAATNN	NNCGAATTAGTANN	NNTGCGCTAATANN	NNAGCCTAATTANN	NNCTCATTAAAGNN	NNCCTAATTAAANN	NNTACATTAATGNN	NNACCCATTACGNN	NNTCCATTAATGNN	NNACTCATTATANN	NNTCTAATTAAGNN	NNAGGGATTAACNN	NNATCCATTAAGNN	NNCGGATTAACNN	NNCCGTATTAGTGNN	NNGCCAATTAAGNN	NNCGCACTAATANN	NNCGTATTAAAANN	NNCGCATTATACNN	NNCTCATTAGCANN	NNCTACTTAGGGNN	NNGCGCTAAGTGNN	NNGCTACTTACGNN	NNCACCTTAATANN	NNCCTCCTTAAGGNN	NNCCCCTTAATCNN	NNCGCCTTATCGNN	NNCTCCTTATCNN	NNGGGCTTAAGCNN	NNCGGCTAAGCCNN	NNATCATAAGTANN	NNCGTCTTACTGNN	NNCCTCTTTAGTNN	NNCGTCTTACTNN	NNTGGTTAAGAANN	NNGCTGGTTAGANN	NNCTAGTTAGGGNN	NNACTCGTTAAGNN	NNCTCGTCAAGNN	NNTCGTTAATANN	NNTCAGGTTAATNN	NNGAACCTACTTNN	NNCTGGTTACTGNN	NNGTCCGGATTGNN	NNCGCTTAACTANN	NNCTAGTTAGTCNN	NNCGGCTTAACANN	NNTCCTGTCAAANN	NNGTGTGTTTCGNN
	>1_TTT_RTVAA.108.114	>2_TTT_RTVSA.102.114	>4_TTC_VRVSA.106.114	>5_TTC_TRVAA.172.114	>6_TTA_VRVAA.231.114	>7_TTA_RVLRA.295.114	>8_TGT_RVVSQ.222.114	>9_TGG_KTTQD.198.114	>10_TGG_KSVMQ.136.114	>11_TGA_KSVAQ.215.114	>12_TGA_RGVAA.217.114	>13_TCT_ATVKA.292.114	>14_TCG_KGTQM.96.114	>15_TCC_RMIKS.133.114	>17_TAT_TRVSA.82.114	>18_TAG_RLTQA.162.114	>19_TAG_RMVSA.102.114	>20_TAC_QRVSA.119.114	>21_TAC_ERVSV.149.114	>22_TAA_RITAA.138.114	>23_GTT_GTRAY.207.114	>24_GTG_HLIQY.70.114	>25_GTA_YTRQV.190.114	>26_GGT_ALKNM.76.114	>27_GGT_LTKDQ.300.114	>28_GGG_RSKER.488.114	>29_GGC_TLKNQ.309.114	>30_GGA_LAKDQ.260.114	>31_GCT_KITKF.113.114	>32_GCC_VRLKY.89.114	>33_GCA_ALRQQ.88.114	>34_GAT_RTMRY.74.114	>35_GAG_VMRWY.100.114	>36_GAC_ATRRF.141.114	>37_GAA_RFQKF.65.114	>38_CTA_LHYAK.134.114	>39_CTA_IFNAK.110.114	>40_CGG_STRER.57.114	>41_CGC_RVMSR.129.114	>42_CGA_TFYAA.51.114	>43_CCT_MTNGK.237.114	>44_CCT_RGDSK.150.114	>45_CCG_RCYEK.262.114	>46_CCC_RLDSK.68.114	>47_CCA_KMTQK.571.114	>48_CCA_EHNAK.367.114	>49_CAT_LSQSR.216.114	>51_CAG_MSHWR.169.114	>52_CAC_LGMRR.211.114
	NNTACGTTAATTNN	NNGTAGCCAATGNN	NNCGAATTAATANN	NNCCTAATTATCNN	NNCTTATTAGTANN	NNTCATTAGTANN	NNATGCATAATGNN	NNGTTACTACCANN	NNGGAAGCCGATNN	NNATTCATTATGNN	NNCCCATTAGAGNN	NNGCGTTAATCCNN	NNCCCATTTAGANN	NNTTCCTAATCCNN	NNTGCGCATCGGNN	NNTAATTATGANN	NNCTCATTAGCGNN	NNCGTGTTAATGNN	NNCGCATTACTANN	NNGCTAATTATANN	NNCGTTCTTTAANN	NNTCCACTTAATNN	NNCTACTTAGAGNN	NNGCCCAGATTGNN	NNCTCCTTTACANN	NNCCACTTAAGGNN	NNCGCCTTAGANN	NNTCCTTAGTANN	NNGGGCTTAAGANN	NNTGTCTTAGATNN	NNATTATAAGTANN	NNCGTCTCAATANN	NNCCCTCTTCAGNN	NNCGTCTTGGTANN	NNCTACTTAGCANN	NNCCTAGTTATTNN	NNGCTAGTTAGGNN	NNTTCCGTTAATNN	NNGCACGTTAGTNN	NNGGTCGTTAACNN	NNTTTGGTTAGTNN	NNTCGGGTTAATNN	NNCCAGTTAATANN	NNCGGGTTATGTNN	NNGGTTTAACTANN	NNCACTTAACCANN	NNTATGTTAACANN	NNCCCTGTTACCNN	NNGTGTTAACTNN
	>1_TTT_RTVAA.108.115	>2_TTT_RTVSA.102.115	>4_TTC_VRVSA.106.115	>5_TTC_TRVAA.171.115	>6_TTA_VRVAA.227.115	>7_TTA_RVLRA.292.115	>8_TGT_RVVSQ.222.115	>9_TGG_KTTQD.195.115	>10_TGG_KSVMQ.133.115	>11_TGA_KSVAQ.214.115	>12_TGA_RGVAA.216.115	>13_TCT_ATVKA.286.115	>14_TCG_KGTQM.94.115	>15_TCC_RMIKS.133.115	>17_TAT_TRVSA.81.115	>18_TAG_RLTQA.161.115	>19_TAG_RMVSA.102.115	>20_TAC_QRVSA.119.115	>21_TAC_ERVSV.148.115	>22_TAA_RITAA.138.115	>23_GTT_GTRAY.202.115	>24_GTG_HLIQY.69.115	>25_GTA_YTRQV.187.115	>26_GGT_ALKNM.76.115	>27_GGT_LTKDQ.298.115	>28_GGG_RSKER.483.115	>29_GGC_TLKNQ.305.115	>30_GGA_LAKDQ.257.115	>31_GCT_KITKF.113.115	>32_GCC_VRLKY.89.115	>33_GCA_ALRQQ.86.115	>34_GAT_RTMRY.74.115	>35_GAG_VMRWY.98.115	>36_GAC_ATRRF.139.115	>37_GAA_RFQKF.64.115	>38_CTA_LHYAK.133.115	>39_CTA_IFNAK.110.115	>40_CGG_STRER.56.115	>41_CGC_RVMSR.128.115	>42_CGA_TFYAA.51.115	>43_CCT_MTNGK.233.115	>44_CCT_RGDSK.149.115	>45_CCG_RCYEK.262.115	>46_CCC_RLDSK.67.115	>47_CCA_KMTQK.564.115	>48_CCA_EHNAK.362.115	>49_CAT_LSQSR.215.115	>51_CAG_MSHWR.166.115	>52_CAC_LGMRR.204.115
	NNGTCTTAATTANN	NNCGCGTTAATANN	NNCATATTAGGANN	NNCCGATAATTANN	NNCTAATCAACANN	NNTTAATTAGTCNN	NNCTCATTAGAGNN	NNCCCCATTATGANN	NNTGCATTATGANN	NNCTAATTACGANN	NNTTAATTAGAANN	NNTCGGATTAACNN	NNCCAATTAATGNN	NNGGGATTAAGGNN	NNTACATTAATANN	NNCTCGTTAATANN	NNTGCGTTAATTNN	NNCACATTAGGGNN	NNGCGCATTAGCNN	NNCCTAATTAGGNN	NNCGGTTAAGTANN	NNACGTTAAGTGNN	NNTACATAAGTANN	NNTCACCTTAAANN	NNCTTCCTTATCNN	NNCCCCTTACTANN	NNGCGCCTTACTNN	NNTTTCTAAGGANN	NNCGGCTTAAATNN	NNTTCATAAGCCNN	NNACTATAAGTANN	NNGTCTTAAGANN	NNCCTCTTTAATNN	NNCGTCTTAAGTNN	NNACTTCTTTAANN	NNGGTAGTTAATNN	NNCCTAGTTAGTGNN	NNCCCGTTACTANN	NNTCGTGTTATCNN	NNACTCGTTAACCNN	NNTTTGGTTAAANN	NNGGTGGTTAACNN	NNGTCAGTTAAGNN	NNGCCCAGATTGNN	NNGACTTAACCANN	NNGCTGGTTACTNN	NNGGCTTTAACANN	NNGCCTGTTTCANN	NNTGTGTTAGATNN
	>1_TTT_RTVAA.107.116	>2_TTT_RTVSA.101.116	>4_TTC_VRVSA.106.116	>5_TTC_TRVAA.171.116	>6_TTA_VRVAA.226.116	>7_TTA_RVLRA.292.116	>8_TGT_RVVSQ.222.116	>9_TGG_KTTQD.193.116	>10_TGG_KSVMQ.132.116	>11_TGA_KSVAQ.211.116	>12_TGA_RGVAA.212.116	>13_TCT_ATVKA.284.116	>14_TCG_KGTQM.93.116	>15_TCC_RMIKS.130.116	>17_TAT_TRVSA.81.116	>18_TAG_RLTQA.160.116	>19_TAG_RMVSA.101.116	>20_TAC_QRVSA.117.116	>21_TAC_ERVSV.144.116	>22_TAA_RITAA.136.116	>23_GTT_GTRAY.201.116	>24_GTG_HLIQY.69.116	>25_GTA_YTRQV.187.116	>26_GGT_ALKNM.74.116	>27_GGT_LTKDQ.296.116	>28_GGG_RSKER.481.116	>29_GGC_TLKNQ.304.116	>30_GGA_LAKDQ.256.116	>31_GCT_KITKF.112.116	>32_GCC_VRLKY.89.116	>33_GCA_ALRQQ.85.116	>34_GAT_RTMRY.73.116	>35_GAG_VMRWY.96.116	>36_GAC_ATRRF.138.116	>37_GAA_RFQKF.63.116	>38_CTA_LHYAK.132.116	>39_CTA_IFNAK.107.116	>40_CGG_STRER.55.116	>41_CGC_RVMSR.126.116	>42_CGA_TFYAA.50.116	>43_CCT_MTNGK.231.116	>44_CCT_RGDSK.148.116	>45_CCG_RCYEK.259.116	>46_CCC_RLDSK.66.116	>47_CCA_KMTQK.560.116	>48_CCA_EHNAK.358.116	>49_CAT_LSQSR.215.116	>51_CAG_MSHWR.164.116	>52_CAC_LGMRR.202.116
	NNCTAATTATCNN	NNGTCCAGATTANN	NNCGTATTATTGNN	NNGCTAATTATGNN	NNGCTCATTAAGNN	NNACGGTAATTANN	NNCGCATTAACGNN	NNGCCCATTATTNN	NNATCATTAATGNN	NNCTAATTAAGANN	NNCTAATTAGATNN	NNGGGATTAGTGNN	NNCTAATTAGCANN	NNCACTATACTTNN	NNAGACAAAGTTNN	NNGCTAATTAAGNN	NNTTTGTTAATGNN	NNCTAATTAACANN	NNACGCATTACGNN	NNTAATTACGANN	NNCATCTAAGTANN	NNTGTTAAGTGNN	NNGCTACTTAGCNN	NNGCGCCTTAGGGNN	NNTCTCCTTAACNN	NNCCCCTTTAGANN	NNCGCCTTATGCNN	NNTCCCTTAAGGNN	NNCACTTAAGCCNN	NNTAGCTAAGCCNN	NNTTCGTAAGTANN	NNGTCTTAAAANN	NNTCCTCTTCAANN	NNCGTCTTACAGNN	NNGTTCTTAAGANN	NNGGTAGTTAACNN	NNCTAGTTAAGNN	NNTCCGTTAATCNN	NNTTCACTAACANN	NNCCCCAACGTANN	NNACAGGTTAAANN	NNTGGGTTAAAANN	NNCCTGGTTATGNN	NNGGTAAAGCATNN	NNAATGGTTAACNN	NNAATGGTTATGNN	NNTCCTTTAACANN	NNCTGTTATTTNN	NNGCGTGTTACTNN
	>1_TTT_RTVAA.107.117	>2_TTT_RTVSA.100.117	>4_TTC_VRVSA.106.117	>5_TTC_TRVAA.171.117	>6_TTA_VRVAA.226.117	>7_TTA_RVLRA.290.117	>8_TGT_RVVSQ.221.117	>9_TGG_KTTQD.187.117	>10_TGG_KSVMQ.130.117	>11_TGA_KSVAQ.211.117	>12_TGA_RGVAA.210.117	>13_TCT_ATVKA.283.117	>14_TCG_KGTQM.93.117	>15_TCC_RMIKS.130.117	>17_TAT_TRVSA.80.117	>18_TAG_RLTQA.160.117	>19_TAG_RMVSA.100.117	>20_TAC_QRVSA.116.117	>21_TAC_ERVSV.144.117	>22_TAA_RITAA.136.117	>23_GTT_GTRAY.201.117	>24_GTG_HLIQY.69.117	>25_GTA_YTRQV.186.117	>26_GGT_ALKNM.73.117	>27_GGT_LTKDQ.292.117	>28_GGG_RSKER.480.117	>29_GGC_TLKNQ.303.117	>30_GGA_LAKDQ.253.117	>31_GCT_KITKF.111.117	>32_GCC_VRLKY.88.117	>33_GCA_ALRQQ.85.117	>34_GAT_RTMRY.73.117	>35_GAG_VMRWY.95.117	>36_GAC_ATRRF.136.117	>37_GAA_RFQKF.63.117	>38_CTA_LHYAK.127.117	>39_CTA_IFNAK.106.117	>40_CGG_STRER.55.117	>41_CGC_RVMSR.125.117	>42_CGA_TFYAA.50.117	>43_CCT_MTNGK.227.117	>44_CCT_RGDSK.148.117	>45_CCG_RCYEK.259.117	>46_CCC_RLDSK.66.117	>47_CCA_KMTQK.549.117	>48_CCA_EHNAK.357.117	>49_CAT_LSQSR.214.117	>51_CAG_MSHWR.162.117	>52_CAC_LGMRR.200.117
	NNCTCATTAGGGNN	NNCCTATTAATTNN	NNCTTATTAATANN	NNTTCATTAGTGNN	NNGTCTTAATTANN	NNAGTTTAATTANN	NNCGTACTAATGNN	NNTCCATTAATGNN	NNTTCATTAGCANN	NNACTGCAAAAGNN	NNCTAATTAACGNN	NNGAGGATTAACNN	NNTCAATTAACANN	NNCGGATTAATNN	NNCGAATTAAGGNN	NNCTAATTATTANN	NNCCAATTAATANN	NNGTATTAACCNN	NNCGTATTAAGNN	NNTACATAATGANN	NNCTACTTGAGTNN	NNTTGCTAAGTGNN	NNAAGATAAGTANN	NNCACCTTAAANN	NNCCTCCTTAAGCNN	NNTCCCTTAGCANN	NNACGCCTTACANN	NNTTCCTTAAGTNN	NNCTTCTTAGGANN	NNGACTTAAGACNN	NNAAATTAAGTANN	NNCTACTTAGTGNN	NNCCTCTTCACNN	NNCGTCTTCTGANN	NNCTACTTAACANN	NNTCTAGTTAGANN	NNGCTCGTTATTNN	NNCCCGTTAGCCNN	NNTATCTTAACANN	NNTCTCGTTAAGNN	NNGGAGGTTAACNN	NNGCAGGTTAACNN	NNCCGGTTAAACNN	NNTCGGGTTATTNN	NNCTAGTTAGCCNN	NNCTAGTTAGGGNN	NNAAGCCTAACANN	NNGGTAAAGCATNN	NNCCGTGTTATCNN
	>1_TTT_RTVAA.106.118	>2_TTT_RTVSA.99.118	>4_TTC_VRVSA.102.118	>5_TTC_TRVAA.170.118	>6_TTA_VRVAA.224.118	>7_TTA_RVLRA.289.118	>8_TGT_RVVSQ.221.118	>9_TGG_KTTQD.182.118	>10_TGG_KSVMQ.129.118	>11_TGA_KSVAQ.207.118	>12_TGA_RGVAA.209.118	>13_TCT_ATVKA.281.118	>14_TCG_KGTQM.93.118	>15_TCC_RMIKS.127.118	>17_TAT_TRVSA.79.118	>18_TAG_RLTQA.153.118	>19_TAG_RMVSA.100.118	>20_TAC_QRVSA.115.118	>21_TAC_ERVSV.143.118	>22_TAA_RITAA.133.118	>23_GTT_GTRAY.199.118	>24_GTG_HLIQY.69.118	>25_GTA_YTRQV.183.118	>26_GGT_ALKNM.72.118	>27_GGT_LTKDQ.284.118	>28_GGG_RSKER.470.118	>29_GGC_TLKNQ.303.118	>30_GGA_LAKDQ.246.118	>31_GCT_KITKF.110.118	>32_GCC_VRLKY.87.118	>33_GCA_ALRQQ.84.118	>34_GAT_RTMRY.73.118	>35_GAG_VMRWY.94.118	>36_GAC_ATRRF.135.118	>37_GAA_RFQKF.63.118	>38_CTA_LHYAK.124.118	>39_CTA_IFNAK.105.118	>40_CGG_STRER.55.118	>41_CGC_RVMSR.125.118	>42_CGA_TFYAA.50.118	>43_CCT_MTNGK.226.118	>44_CCT_RGDSK.146.118	>45_CCG_RCYEK.255.118	>46_CCC_RLDSK.65.118	>47_CCA_KMTQK.546.118	>48_CCA_EHNAK.354.118	>49_CAT_LSQSR.213.118	>51_CAG_MSHWR.160.118	>52_CAC_LGMRR.199.118
	NNATTAATTAGTNN	NNCTAATTATTANN	NNACATTAATANN	NNAGCTAATTANN	NNCCTCATTAAGNN	NNGTGTTATGTTNN	NNCTCATTAATANN	NNCCCCATTAGAGNN	NNCTAATTAATANN	NNTAATTAACANN	NNTCATTAACTNN	NNAGGATTATCANN	NNTCCATTAGCGNN	NNGGGATTAACANN	NNCTAATTATGANN	NNCTAATTACGANN	NNGGCACTAATANN	NNTGCATTAGTGNN	NNACGCATTAAANN	NNGCTAATTACANN	NNCTACTTAGATNN	NNTCCACTTACGNN	NNCTACTTAATCNN	NNGCGCCTTATANN	NNCTCCTTTAAANN	NNATCCCTTAACNN	NNGCGCCTTAAGCNN	NNCTCCTTTATGNN	NNCGGCTTATTANN	NNGAACTAAGCCNN	NNTGCTTGAGTANN	NNTCGTCTTAAANN	NNACCTCTTAGANN	NNCGTCTTAGGGNN	NNGGTTTAAGCCNN	NNCCTAGTTACTNN	NNCCTAGTTAGTANN	NNCCCCGTTAATTNN	NNGCGTTAGCTNN	NNACTCGTTAGGANN	NNGTTGGTTACCNN	NNCGGGTTATGNN	NNGTTGGTTAAANN	NNTGCGCATCTANN	NNGTCTTAACTANN	NNGATGGTTATANN	NNTGCGTTAACANN	NNCCTGTTTAAANN	NNTTGTGTTAGANN
	>1_TTT_RTVAA.106.119	>2_TTT_RTVSA.99.119	>4_TTC_VRVSA.101.119	>5_TTC_TRVAA.169.119	>6_TTA_VRVAA.218.119	>7_TTA_RVLRA.288.119	>8_TGT_RVVSQ.219.119	>9_TGG_KTTQD.179.119	>10_TGG_KSVMQ.127.119	>11_TGA_KSVAQ.204.119	>12_TGA_RGVAA.209.119	>13_TCT_ATVKA.279.119	>14_TCG_KGTQM.92.119	>15_TCC_RMIKS.125.119	>17_TAT_TRVSA.79.119	>18_TAG_RLTQA.151.119	>19_TAG_RMVSA.100.119	>20_TAC_QRVSA.114.119	>21_TAC_ERVSV.143.119	>22_TAA_RITAA.133.119	>23_GTT_GTRAY.199.119	>24_GTG_HLIQY.68.119	>25_GTA_YTRQV.181.119	>26_GGT_ALKNM.71.119	>27_GGT_LTKDQ.282.119	>28_GGG_RSKER.469.119	>29_GGC_TLKNQ.296.119	>30_GGA_LAKDQ.239.119	>31_GCT_KITKF.110.119	>32_GCC_VRLKY.87.119	>33_GCA_ALRQQ.84.119	>34_GAT_RTMRY.71.119	>35_GAG_VMRWY.94.119	>36_GAC_ATRRF.131.119	>37_GAA_RFQKF.62.119	>38_CTA_LHYAK.121.119	>39_CTA_IFNAK.105.119	>40_CGG_STRER.55.119	>41_CGC_RVMSR.122.119	>42_CGA_TFYAA.49.119	>43_CCT_MTNGK.221.119	>44_CCT_RGDSK.145.119	>45_CCG_RCYEK.253.119	>46_CCC_RLDSK.65.119	>47_CCA_KMTQK.543.119	>48_CCA_EHNAK.350.119	>49_CAT_LSQSR.211.119	>51_CAG_MSHWR.160.119	>52_CAC_LGMRR.199.119
	NNCCTCATTATGNN	NNCGTATTAATTNN	NNCGTATTAAATNN	NNTTAATTAAGTNN	NNCTTATTAAGGNN	NNCTAATTAGAGNN	NNCTCATTAGGGNN	NNACCCATTAGGNN	NNTCCATTAATANN	NNCTAATTATTANN	NNGTCCTAATTANN	NNTTACTAATCCNN	NNCCCATTAAAANN	NNAGGTTAATCCNN	NNGTCCAGATTANN	NNTCAATTAAAANN	NNGTTCTTAATANN	NNCATATTAGTGNN	NNGTGTATTAATNN	NNCTAATTATGCNN	NNCTACTTAGCCNN	NNCCACTTACAGNN	NNGCCATAAGTANN	NNGCACCTTAGCNN	NNCACCTTAAGTNN	NNGCCCCTCAAANN	NNGCACCTTATANN	NNATTCCTTAAGNN	NNCTTCTTAAGCNN	NNCGGCTTAGTGNN	NNCCTACTTACGNN	NNCGTCTTAGATNN	NNTCCTCTTAAGNN	NNCGTCTCAAAANN	NNGGTCCTTAGGNN	NNGCTGGTTATCNN	NNACTAGTTAGGNN	NNCCCGTTATTANN	NNCAGTTAACANN	NNGCTCGTTAGTCNN	NNGGAGGTTAATNN	NNCCTGGTTAAGNN	NNTTTCAAGTCANN	NNACGGGTTTGANN	NNTAGTTAAACNN	NNCTAGTTAACGNN	NNGCGTGTTACANN	NNCCTGTTAAGNN	NNCGTGTTAAAGNN
	>1_TTT_RTVAA.106.120	>2_TTT_RTVSA.98.120	>4_TTC_VRVSA.100.120	>5_TTC_TRVAA.167.120	>6_TTA_VRVAA.217.120	>7_TTA_RVLRA.287.120	>8_TGT_RVVSQ.219.120	>9_TGG_KTTQD.173.120	>10_TGG_KSVMQ.125.120	>11_TGA_KSVAQ.204.120	>12_TGA_RGVAA.209.120	>13_TCT_ATVKA.277.120	>14_TCG_KGTQM.92.120	>15_TCC_RMIKS.125.120	>17_TAT_TRVSA.76.120	>18_TAG_RLTQA.150.120	>19_TAG_RMVSA.99.120	>20_TAC_QRVSA.113.120	>21_TAC_ERVSV.143.120	>22_TAA_RITAA.130.120	>23_GTT_GTRAY.197.120	>24_GTG_HLIQY.68.120	>25_GTA_YTRQV.175.120	>26_GGT_ALKNM.70.120	>27_GGT_LTKDQ.280.120	>28_GGG_RSKER.459.120	>29_GGC_TLKNQ.294.120	>30_GGA_LAKDQ.236.120	>31_GCT_KITKF.109.120	>32_GCC_VRLKY.87.120	>33_GCA_ALRQQ.83.120	>34_GAT_RTMRY.69.120	>35_GAG_VMRWY.91.120	>36_GAC_ATRRF.117.120	>37_GAA_RFQKF.61.120	>38_CTA_LHYAK.121.120	>39_CTA_IFNAK.104.120	>40_CGG_STRER.53.120	>41_CGC_RVMSR.122.120	>42_CGA_TFYAA.48.120	>43_CCT_MTNGK.221.120	>44_CCT_RGDSK.145.120	>45_CCG_RCYEK.251.120	>46_CCC_RLDSK.65.120	>47_CCA_KMTQK.538.120	>48_CCA_EHNAK.341.120	>49_CAT_LSQSR.209.120	>51_CAG_MSHWR.159.120	>52_CAC_LGMRR.198.120
	NNGTGTTATGTTNN	NNCTCATTATTANN	NNCGAATTAGTGNN	NNCGTTTAATTANN	NNCTTATTAGATNN	NNTGTTTAATTANN	NNACCCTTAATGNN	NNCCCATTACAANN	NNACATTAATANN	NNTTCATTACTANN	NNCCTAATTATANN	NNTGGATTAGGANN	NNGCCGCTCCAANN	NNGCGGATTAACNN	NNCGTATTAGCCNN	NNGTAATTAGTANN	NNTTCGCTAATTNN	NNCGCATTAATNN	NNTGTATTAAGGNN	NNGTCCTAATTANN	NNCTACTTAATANN	NNGCACTAAGTGNN	NNCTACTCAAGTNN	NNTACATAATGANN	NNCTCCTTTGTANN	NNTCCCTTAATNN	NNCACCTTAAGGNN	NNCTCCTTAACCNN	NNCTTCTTAAAGNN	NNTTTTTAAGAANN	NNAGGCTAAGTANN	NNTAACCCCTGANN	NNCCTCTTACGCNN	NNCGTCTCACAANN	NNAGGGTTAAGANN	NNCTAGTTATCANN	NNGCTCGTTAGTGNN	NNCCCCGTTATANN	NNTGCGTTAGCANN	NNCCTCGTTAGGANN	NNTCACGCCGAGNN	NNCCGGGTTAATNN	NNACCAGTTAACNN	NNCGGGTTAGGTNN	NNCTAGTTAGGGNN	NNCTAGTTAACANN	NNCATGTTAGTANN	NNCTGTTTGCCNN	NNGTGTGTAAACNN
	>1_TTT_RTVAA.106.121	>2_TTT_RTVSA.98.121	>4_TTC_VRVSA.99.121	>5_TTC_TRVAA.163.121	>6_TTA_VRVAA.215.121	>7_TTA_RVLRA.287.121	>8_TGT_RVVSQ.215.121	>9_TGG_KTTQD.167.121	>10_TGG_KSVMQ.123.121	>11_TGA_KSVAQ.185.121	>12_TGA_RGVAA.208.121	>13_TCT_ATVKA.275.121	>14_TCG_KGTQM.92.121	>15_TCC_RMIKS.124.121	>17_TAT_TRVSA.76.121	>18_TAG_RLTQA.149.121	>19_TAG_RMVSA.95.121	>20_TAC_QRVSA.108.121	>21_TAC_ERVSV.139.121	>22_TAA_RITAA.129.121	>23_GTT_GTRAY.197.121	>24_GTG_HLIQY.68.121	>25_GTA_YTRQV.174.121	>26_GGT_ALKNM.69.121	>27_GGT_LTKDQ.273.121	>28_GGG_RSKER.455.121	>29_GGC_TLKNQ.290.121	>30_GGA_LAKDQ.231.121	>31_GCT_KITKF.109.121	>32_GCC_VRLKY.86.121	>33_GCA_ALRQQ.81.121	>34_GAT_RTMRY.69.121	>35_GAG_VMRWY.90.121	>36_GAC_ATRRF.117.121	>37_GAA_RFQKF.61.121	>38_CTA_LHYAK.119.121	>39_CTA_IFNAK.103.121	>40_CGG_STRER.53.121	>41_CGC_RVMSR.120.121	>42_CGA_TFYAA.47.121	>43_CCT_MTNGK.215.121	>44_CCT_RGDSK.144.121	>45_CCG_RCYEK.248.121	>46_CCC_RLDSK.64.121	>47_CCA_KMTQK.532.121	>48_CCA_EHNAK.339.121	>49_CAT_LSQSR.208.121	>51_CAG_MSHWR.158.121	>52_CAC_LGMRR.197.121
	NNTAATTATTGNN	NNTGCATTAATGNN	NNATTAATTAGTNN	NNACACTAATTANN	NNCTAATTGAACNN	NNGTTCTAATTANN	NNTTCATTAGTGNN	NNACCCATTAGTNN	NNCCCATTATCANN	NNTCTCATTAATNN	NNTCATTAATGNN	NNCGGATTACGCNN	NNCTACTTATCANN	NNACTCTAATCCNN	NNCGTATTAGCTNN	NNCCCAATTATGNN	NNGTGTTATGTTNN	NNCGAATTAAGANN	NNGTGTATTAACNN	NNCTAATTATATNN	NNCACTCAAGTANN	NNAGGTTAAGTGNN	NNCACATAAGTANN	NNTCGCCTCAAGNN	NNCTCCTTAAGGANN	NNTCCCTTAAGNN	NNGCCTTAAGCNN	NNGCTCCTTATANN	NNTGGCTTAAGGNN	NNAGGCTAAGCCNN	NNTCCTCAAGTANN	NNCGTCTTTAGANN	NNCTCTTAACGNN	NNCGTCTTGGAGNN	NNCTACTTATCANN	NNCTAGTTAGCNN	NNCTCGTTAAGGNN	NNCCGTTAACANN	NNCGTGTTACTGNN	NNGCTTGTTAAGNN	NNTTGGTTAACGNN	NNTTAGTTAACANN	NNGTTGGTTAACNN	NNGTCCAGATTTNN	NNATGCTAACTANN	NNGTGTTATGTTNN	NNCCGTGTTAAGNN	NNATACTGTTAANN	NNCGTGTTTAAANN
	>1_TTT_RTVAA.105.122	>2_TTT_RTVSA.97.122	>4_TTC_VRVSA.98.122	>5_TTC_TRVAA.163.122	>6_TTA_VRVAA.211.122	>7_TTA_RVLRA.283.122	>8_TGT_RVVSQ.215.122	>9_TGG_KTTQD.162.122	>10_TGG_KSVMQ.123.122	>11_TGA_KSVAQ.184.122	>12_TGA_RGVAA.206.122	>13_TCT_ATVKA.272.122	>14_TCG_KGTQM.91.122	>15_TCC_RMIKS.123.122	>17_TAT_TRVSA.74.122	>18_TAG_RLTQA.149.122	>19_TAG_RMVSA.93.122	>20_TAC_QRVSA.108.122	>21_TAC_ERVSV.138.122	>22_TAA_RITAA.128.122	>23_GTT_GTRAY.196.122	>24_GTG_HLIQY.67.122	>25_GTA_YTRQV.172.122	>26_GGT_ALKNM.69.122	>27_GGT_LTKDQ.272.122	>28_GGG_RSKER.450.122	>29_GGC_TLKNQ.289.122	>30_GGA_LAKDQ.228.122	>31_GCT_KITKF.108.122	>32_GCC_VRLKY.85.122	>33_GCA_ALRQQ.81.122	>34_GAT_RTMRY.69.122	>35_GAG_VMRWY.90.122	>36_GAC_ATRRF.114.122	>37_GAA_RFQKF.57.122	>38_CTA_LHYAK.118.122	>39_CTA_IFNAK.99.122	>40_CGG_STRER.52.122	>41_CGC_RVMSR.119.122	>42_CGA_TFYAA.47.122	>43_CCT_MTNGK.215.122	>44_CCT_RGDSK.142.122	>45_CCG_RCYEK.240.122	>46_CCC_RLDSK.63.122	>47_CCA_KMTQK.516.122	>48_CCA_EHNAK.337.122	>49_CAT_LSQSR.201.122	>51_CAG_MSHWR.155.122	>52_CAC_LGMRR.191.122
	NNGCTAATTAAGNN	NNTTCGCTAATTNN	NNGATCGTAATGNN	NNACTTTAATTANN	NNTTGTTAATTANN	NNTAATTAGAGNN	NNCACATTACGANN	NNGATGCTAAACNN	NNCACATTAAGTNN	NNCCTCATTAAGNN	NNCCCATTATGANN	NNCCGGATTAGTGNN	NNCCATTAAGGNN	NNTGCTTAATCCNN	NNGTATTAACANN	NNTCAATTATTANN	NNCGTGCTAATGNN	NNCGTTTTAATANN	NNCGTATTAGATNN	NNTGGTTAATTANN	NNTCTACTTAAANN	NNTAGTTAAGTGNN	NNCTACTTACAANN	NNCCGCCTTAGTNN	NNTCACTAAGGANN	NNCCACTTAACANN	NNCGCCTTTAGCNN	NNCCTCCTTAGCANN	NNCGTCTTAGGGNN	NNAACGTAAGCCNN	NNCGATTAAGTANN	NNTGTCTTAGATNN	NNCCTCTTCAGGNN	NNCGTCTTGGCANN	NNCCCTTAAGAANN	NNCCTAGTTAACCNN	NNACTCGTTACANN	NNTCCGTTAAACNN	NNCACGCTAACANN	NNCTTGTTAATANN	NNCGGGTTAATANN	NNGCTGGTTATANN	NNGCCAGTTAAANN	NNGTCCAGCTTGNN	NNCTCGTTAGTGNN	NNATGGTTAAGANN	NNGCTGTTAACANN	NNCCTGTTACAGNN	NNTTTTTGTACTNN
	>1_TTT_RTVAA.104.123	>2_TTT_RTVSA.96.123	>4_TTC_VRVSA.98.123	>5_TTC_TRVAA.159.123	>6_TTA_VRVAA.208.123	>7_TTA_RVLRA.281.123	>8_TGT_RVVSQ.213.123	>9_TGG_KTTQD.161.123	>10_TGG_KSVMQ.123.123	>11_TGA_KSVAQ.182.123	>12_TGA_RGVAA.204.123	>13_TCT_ATVKA.272.123	>14_TCG_KGTQM.88.123	>15_TCC_RMIKS.119.123	>17_TAT_TRVSA.74.123	>18_TAG_RLTQA.149.123	>19_TAG_RMVSA.92.123	>20_TAC_QRVSA.108.123	>21_TAC_ERVSV.136.123	>22_TAA_RITAA.127.123	>23_GTT_GTRAY.196.123	>24_GTG_HLIQY.67.123	>25_GTA_YTRQV.171.123	>26_GGT_ALKNM.68.123	>27_GGT_LTKDQ.264.123	>28_GGG_RSKER.448.123	>29_GGC_TLKNQ.289.123	>30_GGA_LAKDQ.226.123	>31_GCT_KITKF.108.123	>32_GCC_VRLKY.84.123	>33_GCA_ALRQQ.81.123	>34_GAT_RTMRY.67.123	>35_GAG_VMRWY.90.123	>36_GAC_ATRRF.113.123	>37_GAA_RFQKF.57.123	>38_CTA_LHYAK.114.123	>39_CTA_IFNAK.99.123	>40_CGG_STRER.52.123	>41_CGC_RVMSR.119.123	>42_CGA_TFYAA.46.123	>43_CCT_MTNGK.214.123	>44_CCT_RGDSK.141.123	>45_CCG_RCYEK.239.123	>46_CCC_RLDSK.63.123	>47_CCA_KMTQK.516.123	>48_CCA_EHNAK.336.123	>49_CAT_LSQSR.199.123	>51_CAG_MSHWR.154.123	>52_CAC_LGMRR.189.123
	NNCGCTTAATTANN	NNTCCACTAATANN	NNCTCATTAAGANN	NNCTAATTAACGNN	NNCTAATTAGCNN	NNTTAATTAGTANN	NNGCTGATAATGNN	NNCCCATTACANN	NNCACATTAGAANN	NNCTAATTAACGNN	NNTTAATTAATANN	NNAGCATAATCCNN	NNCTAATTAGTANN	NNGCGGATTATANN	NNCGTATTAGCANN	NNGCTTGTTAACNN	NNCACATTAGAGNN	NNCTAATTAGTANN	NNCACATTAATANN	NNCTCATTAACTNN	NNACTACTTAAANN	NNCCACTTAGCCNN	NNCTACTTAGANN	NNGCGCCTTAGTANN	NNCTCCTTACANN	NNTCCCTCAACANN	NNTCGCCTTAGTGNN	NNACTCCTTATANN	NNGGGTTTTAAANN	NNGGGGCTTACANN	NNTTTCTGAGTANN	NNCGTCTTACCNN	NNTCTCTCGCCTNN	NNCGTCTCAGCANN	NNCCTACTTAACNN	NNGCTAGTTAAGTNN	NNCCTCGTTAACNN	NNCTGAAAGGTANN	NNTCGCGTTAAGNN	NNCTCGTTATACNN	NNGCAGGTTAAGNN	NNGGGTTAATTNN	NNCCTGGTTATANN	NNGTCCGCACGGNN	NNCTAGTTAATTNN	NNCCTAGTTATGNN	NNCCCCTTAACANN	NNCCCTGTTAGGNN	NNTGTGTTAACANN
	>1_TTT_RTVAA.104.124	>2_TTT_RTVSA.95.124	>4_TTC_VRVSA.98.124	>5_TTC_TRVAA.158.124	>6_TTA_VRVAA.207.124	>7_TTA_RVLRA.279.124	>8_TGT_RVVSQ.213.124	>9_TGG_KTTQD.160.124	>10_TGG_KSVMQ.123.124	>11_TGA_KSVAQ.182.124	>12_TGA_RGVAA.203.124	>13_TCT_ATVKA.270.124	>14_TCG_KGTQM.87.124	>15_TCC_RMIKS.118.124	>17_TAT_TRVSA.73.124	>18_TAG_RLTQA.148.124	>19_TAG_RMVSA.92.124	>20_TAC_QRVSA.108.124	>21_TAC_ERVSV.135.124	>22_TAA_RITAA.125.124	>23_GTT_GTRAY.194.124	>24_GTG_HLIQY.67.124	>25_GTA_YTRQV.171.124	>26_GGT_ALKNM.67.124	>27_GGT_LTKDQ.259.124	>28_GGG_RSKER.436.124	>29_GGC_TLKNQ.281.124	>30_GGA_LAKDQ.224.124	>31_GCT_KITKF.106.124	>32_GCC_VRLKY.84.124	>33_GCA_ALRQQ.80.124	>34_GAT_RTMRY.67.124	>35_GAG_VMRWY.89.124	>36_GAC_ATRRF.112.124	>37_GAA_RFQKF.57.124	>38_CTA_LHYAK.112.124	>39_CTA_IFNAK.98.124	>40_CGG_STRER.52.124	>41_CGC_RVMSR.117.124	>42_CGA_TFYAA.46.124	>43_CCT_MTNGK.211.124	>44_CCT_RGDSK.140.124	>45_CCG_RCYEK.235.124	>46_CCC_RLDSK.62.124	>47_CCA_KMTQK.503.124	>48_CCA_EHNAK.334.124	>49_CAT_LSQSR.198.124	>51_CAG_MSHWR.154.124	>52_CAC_LGMRR.183.124
	NNTTCGTTAATTNN	NNACACTTAATANN	NNCGCATTAACCNN	NNTAATTAGAGNN	NNCTTATTATAGNN	NNGCACTAATTANN	NNGTACTTAATGNN	NNGCCCATTAGCNN	NNCTCATTATAANN	NNCTCATTAGCANN	NNTAATTAATCNN	NNGGATTAATCCNN	NNATTCATTAACNN	NNGGAGATTAATNN	NNGCGTATTACGNN	NNTCAATTAAACNN	NNCACACTAATTNN	NNTAATTAACANN	NNCGCATTAATNN	NNTAGTTAATTANN	NNCTTCTAAGTANN	NNCCACTTAGANN	NNCCTACTTAACNN	NNGCGCCTTACTNN	NNCCTCCTTATCNN	NNCTCCCTTAGANN	NNCGCCTTATCANN	NNTAATTAAGGANN	NNCGTCTTATAGNN	NNCGGCTTAAGCNN	NNAATGTAAGTANN	NNCGAGTTAAGANN	NNGCCTCTCCACNN	NNCGTCTTACGTNN	NNGCTTCTTAATANN	NNCTAGTTACCANN	NNCTAGTTAGTCNN	NNTTCCGTTAAGNN	NNGGACTTAACANN	NNTCGTTAACANN	NNACTAGTTAACNN	NNCGCGTTAGAANN	NNCAGTTAACANN	NNTCGGGTTAGGNN	NNGCGCTAACTANN	NNGATGGTTATTNN	NNTTGTTAACANN	NNCCTGTTTAATNN	NNCCGTGTCAAANN
	>1_TTT_RTVAA.103.125	>2_TTT_RTVSA.94.125	>4_TTC_VRVSA.96.125	>5_TTC_TRVAA.157.125	>6_TTA_VRVAA.205.125	>7_TTA_RVLRA.279.125	>8_TGT_RVVSQ.213.125	>9_TGG_KTTQD.155.125	>10_TGG_KSVMQ.121.125	>11_TGA_KSVAQ.181.125	>12_TGA_RGVAA.201.125	>13_TCT_ATVKA.261.125	>14_TCG_KGTQM.87.125	>15_TCC_RMIKS.117.125	>17_TAT_TRVSA.71.125	>18_TAG_RLTQA.147.125	>19_TAG_RMVSA.92.125	>20_TAC_QRVSA.107.125	>21_TAC_ERVSV.130.125	>22_TAA_RITAA.125.125	>23_GTT_GTRAY.193.125	>24_GTG_HLIQY.66.125	>25_GTA_YTRQV.169.125	>26_GGT_ALKNM.67.125	>27_GGT_LTKDQ.254.125	>28_GGG_RSKER.433.125	>29_GGC_TLKNQ.278.125	>30_GGA_LAKDQ.222.125	>31_GCT_KITKF.105.125	>32_GCC_VRLKY.83.125	>33_GCA_ALRQQ.79.125	>34_GAT_RTMRY.66.125	>35_GAG_VMRWY.89.125	>36_GAC_ATRRF.112.125	>37_GAA_RFQKF.57.125	>38_CTA_LHYAK.109.125	>39_CTA_IFNAK.97.125	>40_CGG_STRER.51.125	>41_CGC_RVMSR.117.125	>42_CGA_TFYAA.45.125	>43_CCT_MTNGK.209.125	>44_CCT_RGDSK.139.125	>45_CCG_RCYEK.231.125	>46_CCC_RLDSK.62.125	>47_CCA_KMTQK.496.125	>48_CCA_EHNAK.333.125	>49_CAT_LSQSR.194.125	>51_CAG_MSHWR.154.125	>52_CAC_LGMRR.182.125
	NNTTAATTAGTGNN	NNCTGCTTAATANN	NNCGTATTATACNN	NNCCTCTAATTANN	NNCTAATTTGGANN	NNCTCATTAATANN	NNGCACATTAACNN	NNCCCATTATGNN	NNCCAATTAATANN	NNGTTCATTAATNN	NNCTCATTAAGTNN	NNCCGGATTATCNN	NNCAATTAGCGNN	NNGGGGATTATANN	NNCGCATTATAANN	NNGTCAATTAATNN	NNTTCGCTAATANN	NNCTAATTAGGGNN	NNCGTATTAGTCNN	NNTCATTAATGNN	NNTGCTTAAGTANN	NNCCACTTATGNN	NNGGACTAAGTANN	NNGCCTTAAACNN	NNTGAGCTGCGTNN	NNCCCCTTTAAGNN	NNGCACCTTATCNN	NNTTCCTTAGTNN	NNCGTCTTAGCTNN	NNGTCTTAACGNN	NNCACATAAGTANN	NNCGTCTTTAAANN	NNGCCTCTTAACNN	NNCGTCTCAAANN	NNGCTTCTTACTNN	NNACTGGTTAAGNN	NNTCTAGTTATCNN	NNTCCGTTAAAGNN	NNCGGCTTAACANN	NNACTCGTTAACNN	NNCTAGTTAAGANN	NNCGGGTTAATTNN	NNTGGTTAGGANN	NNTGCGCATCGGNN	NNCCTTTAACCANN	NNGATAGTTAGTNN	NNTTCATTAACANN	NNCCTGTTTATGNN	NNTGTGTTAACNN
	>1_TTT_RTVAA.102.126	>2_TTT_RTVSA.94.126	>4_TTC_VRVSA.96.126	>5_TTC_TRVAA.156.126	>6_TTA_VRVAA.203.126	>7_TTA_RVLRA.278.126	>8_TGT_RVVSQ.211.126	>9_TGG_KTTQD.154.126	>10_TGG_KSVMQ.118.126	>11_TGA_KSVAQ.181.126	>12_TGA_RGVAA.196.126	>13_TCT_ATVKA.257.126	>14_TCG_KGTQM.84.126	>15_TCC_RMIKS.117.126	>17_TAT_TRVSA.71.126	>18_TAG_RLTQA.146.126	>19_TAG_RMVSA.91.126	>20_TAC_QRVSA.106.126	>21_TAC_ERVSV.129.126	>22_TAA_RITAA.124.126	>23_GTT_GTRAY.192.126	>24_GTG_HLIQY.66.126	>25_GTA_YTRQV.166.126	>26_GGT_ALKNM.66.126	>27_GGT_LTKDQ.252.126	>28_GGG_RSKER.424.126	>29_GGC_TLKNQ.277.126	>30_GGA_LAKDQ.221.126	>31_GCT_KITKF.105.126	>32_GCC_VRLKY.82.126	>33_GCA_ALRQQ.78.126	>34_GAT_RTMRY.66.126	>35_GAG_VMRWY.89.126	>36_GAC_ATRRF.109.126	>37_GAA_RFQKF.57.126	>38_CTA_LHYAK.105.126	>39_CTA_IFNAK.97.126	>40_CGG_STRER.51.126	>41_CGC_RVMSR.117.126	>42_CGA_TFYAA.45.126	>43_CCT_MTNGK.205.126	>44_CCT_RGDSK.138.126	>45_CCG_RCYEK.220.126	>46_CCC_RLDSK.61.126	>47_CCA_KMTQK.494.126	>48_CCA_EHNAK.330.126	>49_CAT_LSQSR.194.126	>51_CAG_MSHWR.154.126	>52_CAC_LGMRR.181.126
	NNCTAATTAAGANN	NNCATATTAGTANN	NNCTAATTAAGTNN	NNGAACTAATTANN	NNCTAATTTGAGNN	NNCGCCTAATTANN	NNATACATAATGNN	NNCCCCATTACANN	NNTACATTAAAANN	NNCTCATTATGGNN	NNCCTAATTATCNN	NNTGTTTAATCCNN	NNGCCCATTATANN	NNTCTCTAATCCNN	NNCATATTAGGGNN	NNGCTCGTTAATNN	NNGCACATTATCNN	NNCGCATTAGGTNN	NNGCGTATCAATNN	NNCCTCATTAACNN	NNCTACTTAGTTNN	NNCCACTTAGCNN	NNTCCATAAGTANN	NNCGCCTTAGGANN	NNCTCCTTATTNN	NNTCCTGACAGTNN	NNGCGCCTTCTANN	NNGCTCCTTAACNN	NNCGCCTTAAGCNN	NNTACCTAAGCCNN	NNAAGTTAAGTANN	NNCGTCCTAAGANN	NNGCCTCTTCGANN	NNCGTCTCACACNN	NNCTTCTTATGGNN	NNCTAGTTATAANN	NNGCTAGTTACCNN	NNGCCCGTCAACNN	NNGCATGTTAATNN	NNCTTGTTAACANN	NNTTTGGTTATGNN	NNTCGGGTTATANN	NNGACGGTTAAANN	NNTTTACAACTCNN	NNGGTAGTTAAANN	NNACTGGTTACANN	NNCTATCTGTCGNN	NNCTGTTTGTANN	NNCTGTGTTAGTNN
	>1_TTT_RTVAA.100.127	>2_TTT_RTVSA.94.127	>4_TTC_VRVSA.95.127	>5_TTC_TRVAA.155.127	>6_TTA_VRVAA.202.127	>7_TTA_RVLRA.278.127	>8_TGT_RVVSQ.211.127	>9_TGG_KTTQD.153.127	>10_TGG_KSVMQ.118.127	>11_TGA_KSVAQ.179.127	>12_TGA_RGVAA.194.127	>13_TCT_ATVKA.257.127	>14_TCG_KGTQM.83.127	>15_TCC_RMIKS.117.127	>17_TAT_TRVSA.70.127	>18_TAG_RLTQA.146.127	>19_TAG_RMVSA.91.127	>20_TAC_QRVSA.105.127	>21_TAC_ERVSV.126.127	>22_TAA_RITAA.124.127	>23_GTT_GTRAY.191.127	>24_GTG_HLIQY.66.127	>25_GTA_YTRQV.164.127	>26_GGT_ALKNM.64.127	>27_GGT_LTKDQ.249.127	>28_GGG_RSKER.418.127	>29_GGC_TLKNQ.271.127	>30_GGA_LAKDQ.219.127	>31_GCT_KITKF.104.127	>32_GCC_VRLKY.82.127	>33_GCA_ALRQQ.78.127	>34_GAT_RTMRY.66.127	>35_GAG_VMRWY.85.127	>36_GAC_ATRRF.108.127	>37_GAA_RFQKF.56.127	>38_CTA_LHYAK.105.127	>39_CTA_IFNAK.96.127	>40_CGG_STRER.51.127	>41_CGC_RVMSR.115.127	>42_CGA_TFYAA.45.127	>43_CCT_MTNGK.201.127	>44_CCT_RGDSK.137.127	>45_CCG_RCYEK.219.127	>46_CCC_RLDSK.61.127	>47_CCA_KMTQK.494.127	>48_CCA_EHNAK.324.127	>49_CAT_LSQSR.193.127	>51_CAG_MSHWR.152.127	>52_CAC_LGMRR.181.127
	NNTTAATTAGCGNN	NNTGCGCATCGGNN	NNCGTATTAAAANN	NNATTCTAATTANN	NNTAATTAATTNN	NNGTAATTAGGGNN	NNGCAGTTAATGNN	NNCCCATTATCGNN	NNCCATTAGTGNN	NNTTTCATTAAGNN	NNCTAATTAAGNN	NNCTGGATTAACNN	NNGCCCATTACANN	NNGGGATTAGTGNN	NNATGCATAATGNN	NNGCTCATTAACNN	NNTTCGTTAATTNN	NNCGCATTAGCCNN	NNTCGTATTATCNN	NNTCTAATTAGANN	NNTACCTAAGTANN	NNCCACTTATAGNN	NNCTTGTAAGTANN	NNTCACCTTAGANN	NNCTCCTTTATANN	NNTCCCTCAATGNN	NNGCCTTAACGNN	NNCCTCCTTAGTNN	NNACTCTTAAGCNN	NNGGGGCTTAAGNN	NNTTCCCAAGTANN	NNCGTCTTACANN	NNCCTCTTAGCTNN	NNCGTCTTTATANN	NNACTTCTTAAGNN	NNGGTGGTTAAANN	NNCTAGTTAAAGNN	NNTCCGTTATTANN	NNAGTCTTAACANN	NNGGTCGTTAAGNN	NNATTAGTTAATNN	NNCGGGTTAAANN	NNCCCGGTTAAGNN	NNGGCCAGATTGNN	NNCCACTAACCANN	NNAGGTTAACCANN	NNCCATGTTAAGNN	NNCCTGTTAACGNN	NNCGTGTCAAACNN
	>1_TTT_RTVAA.100.128	>2_TTT_RTVSA.92.128	>4_TTC_VRVSA.95.128	>5_TTC_TRVAA.152.128	>6_TTA_VRVAA.198.128	>7_TTA_RVLRA.277.128	>8_TGT_RVVSQ.208.128	>9_TGG_KTTQD.150.128	>10_TGG_KSVMQ.117.128	>11_TGA_KSVAQ.179.128	>12_TGA_RGVAA.192.128	>13_TCT_ATVKA.257.128	>14_TCG_KGTQM.83.128	>15_TCC_RMIKS.116.128	>17_TAT_TRVSA.69.128	>18_TAG_RLTQA.145.128	>19_TAG_RMVSA.91.128	>20_TAC_QRVSA.105.128	>21_TAC_ERVSV.125.128	>22_TAA_RITAA.123.128	>23_GTT_GTRAY.186.128	>24_GTG_HLIQY.65.128	>25_GTA_YTRQV.163.128	>26_GGT_ALKNM.63.128	>27_GGT_LTKDQ.248.128	>28_GGG_RSKER.414.128	>29_GGC_TLKNQ.268.128	>30_GGA_LAKDQ.218.128	>31_GCT_KITKF.104.128	>32_GCC_VRLKY.81.128	>33_GCA_ALRQQ.77.128	>34_GAT_RTMRY.65.128	>35_GAG_VMRWY.85.128	>36_GAC_ATRRF.105.128	>37_GAA_RFQKF.56.128	>38_CTA_LHYAK.103.128	>39_CTA_IFNAK.96.128	>40_CGG_STRER.50.128	>41_CGC_RVMSR.115.128	>42_CGA_TFYAA.44.128	>43_CCT_MTNGK.200.128	>44_CCT_RGDSK.137.128	>45_CCG_RCYEK.219.128	>46_CCC_RLDSK.60.128	>47_CCA_KMTQK.494.128	>48_CCA_EHNAK.323.128	>49_CAT_LSQSR.192.128	>51_CAG_MSHWR.151.128	>52_CAC_LGMRR.179.128
	NNCTCATTACGANN	NNATCATTAATGNN	NNCGTATTAGCCNN	NNCACTTAATTANN	NNCTTATTAACCNN	NNGCTAATTATCNN	NNCACATTAGGGNN	NNGCCCATTATCANN	NNTCATTAAGTNN	NNGTTAATTAACNN	NNCTCATTACGANN	NNAACTTAATCCNN	NNCCAATTAAAGNN	NNTAGCTAATCCNN	NNGTTGCTAATGNN	NNCCAATTACGANN	NNTCTGCTAATGNN	NNCGCATTACGGNN	NNGCGCATTAACANN	NNCTAATTAGCCNN	NNGGGCTAAGTANN	NNCCCACTTAACANN	NNATTTTAAGTANN	NNTCGCCTTATANN	NNTTCCTTAAAGNN	NNCTCCCTTAATNN	NNACGCCTTATANN	NNCATTTAAGGANN	NNCGTCTTAAGTNN	NNAGATTAAGCCNN	NNCCACTAAGTANN	NNCGTCTTACCANN	NNGCCTCTCAACNN	NNGCGTCTTAAGNN	NNGGTACTTAGTNN	NNTCTAGTTATANN	NNCTCGTTAGGGNN	NNCCGTTAACTNN	NNTTGCTTAACANN	NNACTCGTTAGTCNN	NNGTTAGTTATGNN	NNCCGGGTTATCNN	NNATTGGTTAAANN	NNTGCAGGAATTNN	NNATATTAACTANN	NNCTGTTAACTANN	NNCATGTTAAGANN	NNCCTGTTAGGNN	NNGTGTGCTATCNN
	>1_TTT_RTVAA.100.129	>2_TTT_RTVSA.92.129	>4_TTC_VRVSA.93.129	>5_TTC_TRVAA.150.129	>6_TTA_VRVAA.197.129	>7_TTA_RVLRA.277.129	>8_TGT_RVVSQ.206.129	>9_TGG_KTTQD.148.129	>10_TGG_KSVMQ.115.129	>11_TGA_KSVAQ.175.129	>12_TGA_RGVAA.191.129	>13_TCT_ATVKA.251.129	>14_TCG_KGTQM.83.129	>15_TCC_RMIKS.115.129	>17_TAT_TRVSA.69.129	>18_TAG_RLTQA.144.129	>19_TAG_RMVSA.90.129	>20_TAC_QRVSA.102.129	>21_TAC_ERVSV.123.129	>22_TAA_RITAA.123.129	>23_GTT_GTRAY.185.129	>24_GTG_HLIQY.65.129	>25_GTA_YTRQV.162.129	>26_GGT_ALKNM.63.129	>27_GGT_LTKDQ.244.129	>28_GGG_RSKER.413.129	>29_GGC_TLKNQ.266.129	>30_GGA_LAKDQ.214.129	>31_GCT_KITKF.103.129	>32_GCC_VRLKY.79.129	>33_GCA_ALRQQ.76.129	>34_GAT_RTMRY.65.129	>35_GAG_VMRWY.83.129	>36_GAC_ATRRF.104.129	>37_GAA_RFQKF.56.129	>38_CTA_LHYAK.103.129	>39_CTA_IFNAK.94.129	>40_CGG_STRER.50.129	>41_CGC_RVMSR.114.129	>42_CGA_TFYAA.44.129	>43_CCT_MTNGK.199.129	>44_CCT_RGDSK.135.129	>45_CCG_RCYEK.216.129	>46_CCC_RLDSK.60.129	>47_CCA_KMTQK.493.129	>48_CCA_EHNAK.322.129	>49_CAT_LSQSR.191.129	>51_CAG_MSHWR.149.129	>52_CAC_LGMRR.178.129
	NNCTAATTACGTNN	NNTTACTTAATANN	NNATCGTTAATANN	NNTTACTAATTANN	NNCTTATTAGGANN	NNATTATAATTANN	NNCTAATTAATGNN	NNCCACTAATGGNN	NNCACATTAAAANN	NNGCTCATTAGGNN	NNTAATTAGTANN	NNGTTTAATCCNN	NNCCCCATTAACNN	NNAGGCTAATCCNN	NNCGCATTATGTNN	NNCCAATTATAANN	NNTCATTAGTANN	NNGATGCTAAACNN	NNGCGTATCAAGNN	NNCGCATTAATANN	NNTACTTAAAANN	NNACCACTTAAGNN	NNGACCTAAGTANN	NNGCGCCTTAACGNN	NNACTCCTTAAANN	NNCCCACTTAACNN	NNCGCCTTATANN	NNTCTCCTTAAGNN	NNTCCTTAAGCCNN	NNGCACTAAGCCNN	NNCTGATAAGTANN	NNGTCTTAGTGNN	NNCCCTCCTCGTNN	NNGTCTTAACGNN	NNATGTTAAGAANN	NNGATAGTTAGTNN	NNAGTAGTTAAGNN	NNGATGCTAAACNN	NNGCGTGTTAGANN	NNCTCGTTATANN	NNTTGGTTAAAGNN	NNGGGTTAGCGNN	NNCCCGGTTAACNN	NNGCGGGTTTGANN	NNATTTTAACCANN	NNGATAGTTAGANN	NNAGGCTTAACANN	NNCCTGTTAGANN	NNGTGTGTCTATNN
	>1_TTT_RTVAA.100.130	>2_TTT_RTVSA.92.130	>4_TTC_VRVSA.92.130	>5_TTC_TRVAA.149.130	>6_TTA_VRVAA.197.130	>7_TTA_RVLRA.277.130	>8_TGT_RVVSQ.205.130	>9_TGG_KTTQD.145.130	>10_TGG_KSVMQ.114.130	>11_TGA_KSVAQ.172.130	>12_TGA_RGVAA.189.130	>13_TCT_ATVKA.251.130	>14_TCG_KGTQM.82.130	>15_TCC_RMIKS.115.130	>17_TAT_TRVSA.67.130	>18_TAG_RLTQA.144.130	>19_TAG_RMVSA.89.130	>20_TAC_QRVSA.102.130	>21_TAC_ERVSV.119.130	>22_TAA_RITAA.122.130	>23_GTT_GTRAY.184.130	>24_GTG_HLIQY.65.130	>25_GTA_YTRQV.161.130	>26_GGT_ALKNM.60.130	>27_GGT_LTKDQ.243.130	>28_GGG_RSKER.411.130	>29_GGC_TLKNQ.266.130	>30_GGA_LAKDQ.210.130	>31_GCT_KITKF.103.130	>32_GCC_VRLKY.79.130	>33_GCA_ALRQQ.76.130	>34_GAT_RTMRY.64.130	>35_GAG_VMRWY.83.130	>36_GAC_ATRRF.104.130	>37_GAA_RFQKF.55.130	>38_CTA_LHYAK.101.130	>39_CTA_IFNAK.93.130	>40_CGG_STRER.49.130	>41_CGC_RVMSR.114.130	>42_CGA_TFYAA.44.130	>43_CCT_MTNGK.196.130	>44_CCT_RGDSK.134.130	>45_CCG_RCYEK.209.130	>46_CCC_RLDSK.59.130	>47_CCA_KMTQK.493.130	>48_CCA_EHNAK.322.130	>49_CAT_LSQSR.190.130	>51_CAG_MSHWR.149.130	>52_CAC_LGMRR.177.130
	NNGCTAATTATGNN	NNCCCATTAATGNN	NNCGTATTATAGNN	NNAATTTAATTANN	NNCTCATTAATNN	NNCCTAATTAAGNN	NNACATTAGCANN	NNGTCCATTAAGGNN	NNTACATAATGANN	NNCTCATTAAATNN	NNTTCATTAGCGNN	NNGACTTAATCCNN	NNCCATTAAGTNN	NNAACTTAATCCNN	NNGGGCTTAATGNN	NNCCAATTATCANN	NNGTTCTTAATGNN	NNCAAATTAATANN	NNCGTATTATANN	NNCTCATTAACNN	NNCTACTTACGGNN	NNGTCACTTAAGNN	NNCCACTAAGTANN	NNCGCCTTAGGNN	NNTTCCTTATAANN	NNTCCCCTTAAGNN	NNCCGCCTTAGANN	NNCCTCCTTAGANN	NNTACTTAAGCCNN	NNGTCTAAAGCCNN	NNCCTACTTAATNN	NNCATCTTAAGTNN	NNCCTCTCTCAANN	NNCGTCTTAGANN	NNGGTTCTCAACNN	NNTCTAGTTACGNN	NNCTAGTTAATNN	NNTCCCGTTAACANN	NNCATGTTAGCGNN	NNACTCGTTAGCNN	NNGCGGGTTAAANN	NNGACATGGACGNN	NNCCGGTTACGANN	NNTTACTAACCANN	NNACATTAACCANN	NNGGTGGTTATCNN	NNATTCCGCTCTNN	NNGCCTGTTATGNN	NNTTGTGTTAAANN
	>1_TTT_RTVAA.100.131	>2_TTT_RTVSA.91.131	>4_TTC_VRVSA.92.131	>5_TTC_TRVAA.147.131	>6_TTA_VRVAA.196.131	>7_TTA_RVLRA.276.131	>8_TGT_RVVSQ.205.131	>9_TGG_KTTQD.143.131	>10_TGG_KSVMQ.112.131	>11_TGA_KSVAQ.171.131	>12_TGA_RGVAA.187.131	>13_TCT_ATVKA.245.131	>14_TCG_KGTQM.82.131	>15_TCC_RMIKS.114.131	>17_TAT_TRVSA.64.131	>18_TAG_RLTQA.143.131	>19_TAG_RMVSA.87.131	>20_TAC_QRVSA.102.131	>21_TAC_ERVSV.118.131	>22_TAA_RITAA.121.131	>23_GTT_GTRAY.184.131	>24_GTG_HLIQY.64.131	>25_GTA_YTRQV.160.131	>26_GGT_ALKNM.60.131	>27_GGT_LTKDQ.242.131	>28_GGG_RSKER.408.131	>29_GGC_TLKNQ.265.131	>30_GGA_LAKDQ.208.131	>31_GCT_KITKF.98.131	>32_GCC_VRLKY.79.131	>33_GCA_ALRQQ.75.131	>34_GAT_RTMRY.64.131	>35_GAG_VMRWY.82.131	>36_GAC_ATRRF.101.131	>37_GAA_RFQKF.55.131	>38_CTA_LHYAK.101.131	>39_CTA_IFNAK.92.131	>40_CGG_STRER.49.131	>41_CGC_RVMSR.113.131	>42_CGA_TFYAA.43.131	>43_CCT_MTNGK.196.131	>44_CCT_RGDSK.133.131	>45_CCG_RCYEK.209.131	>46_CCC_RLDSK.57.131	>47_CCA_KMTQK.485.131	>48_CCA_EHNAK.322.131	>49_CAT_LSQSR.189.131	>51_CAG_MSHWR.142.131	>52_CAC_LGMRR.176.131
	NNGTTCATTATCNN	NNCACATTAGAGNN	NNCACATTAATANN	NNCTATTAATTANN	NNCCTCATTATCNN	NNCTCATTAAANN	NNTTTCCTAATGNN	NNACCCATTAATANN	NNGCATTAGCGNN	NNTCATTAGAANN	NNTTAATTAGGANN	NNGGGGATTATCNN	NNCTCATTAGGGNN	NNGGGGATTACGNN	NNCCTGCTAATGNN	NNCTCGTTAGTGNN	NNAGCGCTAATGNN	NNCTCACTAATANN	NNCGTATTATCTNN	NNATCTTATTACNN	NNAGGATAAGTANN	NNCCCACTTAGAANN	NNTGGCTAAGTANN	NNCCGCCTTAGGGNN	NNCTCCTTACGNN	NNACCCCTCAAANN	NNGCGCCTTAAGTNN	NNGCTCCTTAGTNN	NNCGGCTTATAANN	NNTTTCTAAGCCNN	NNAGGATAAGTANN	NNCCGTCTTAAANN	NNCCTCTTAGGTNN	NNGCGTCTTACTNN	NNGTCTTAAGAANN	NNCCTAGTTAAGGNN	NNGCTAGTTATANN	NNGTCCGTTATGNN	NNCGCGTTAGAANN	NNTCGTTACGGNN	NNGGTGGTTAATNN	NNTGGGTTAAGGNN	NNCTGGTTACACNN	NNCCGGGTTACGNN	NNACTGGTTAAGNN	NNACTGGTTATANN	NNTTCTTTAACANN	NNCTGTTATCTNN	NNGTGTGTAATCNN
	>1_TTT_RTVAA.100.132	>2_TTT_RTVSA.91.132	>4_TTC_VRVSA.91.132	>5_TTC_TRVAA.145.132	>6_TTA_VRVAA.190.132	>7_TTA_RVLRA.276.132	>8_TGT_RVVSQ.203.132	>9_TGG_KTTQD.139.132	>10_TGG_KSVMQ.112.132	>11_TGA_KSVAQ.171.132	>12_TGA_RGVAA.186.132	>13_TCT_ATVKA.244.132	>14_TCG_KGTQM.81.132	>15_TCC_RMIKS.113.132	>17_TAT_TRVSA.63.132	>18_TAG_RLTQA.141.132	>19_TAG_RMVSA.87.132	>20_TAC_QRVSA.102.132	>21_TAC_ERVSV.118.132	>22_TAA_RITAA.121.132	>23_GTT_GTRAY.183.132	>24_GTG_HLIQY.63.132	>25_GTA_YTRQV.158.132	>26_GGT_ALKNM.59.132	>27_GGT_LTKDQ.239.132	>28_GGG_RSKER.398.132	>29_GGC_TLKNQ.264.132	>30_GGA_LAKDQ.202.132	>31_GCT_KITKF.98.132	>32_GCC_VRLKY.79.132	>33_GCA_ALRQQ.75.132	>34_GAT_RTMRY.64.132	>35_GAG_VMRWY.82.132	>36_GAC_ATRRF.100.132	>37_GAA_RFQKF.55.132	>38_CTA_LHYAK.100.132	>39_CTA_IFNAK.92.132	>40_CGG_STRER.49.132	>41_CGC_RVMSR.113.132	>42_CGA_TFYAA.42.132	>43_CCT_MTNGK.195.132	>44_CCT_RGDSK.133.132	>45_CCG_RCYEK.207.132	>46_CCC_RLDSK.57.132	>47_CCA_KMTQK.483.132	>48_CCA_EHNAK.321.132	>49_CAT_LSQSR.189.132	>51_CAG_MSHWR.140.132	>52_CAC_LGMRR.173.132
	NNCTCCTTAATTNN	NNCTCATTAAAGNN	NNTCATTAGTGNN	NNTATCTAATTANN	NNCTAATCAAAGNN	NNTTAATTAAGANN	NNAGTCCTAATGNN	NNCCCCATTAAGANN	NNCACTTAATGANN	NNATTCATTAAGNN	NNCTCATTATAGNN	NNTGGATTAATANN	NNCCCATTAGACNN	NNCGGATTAAGNN	NNCCGCATTAGTGNN	NNGTCAATTATCNN	NNTTAATTAATANN	NNACGTATTAGTNN	NNCGTATTAACANN	NNCCTAATTATGNN	NNGTACTAAGTANN	NNCCCACTTATTNN	NNATTATAAGTANN	NNGCGCCTTTACNN	NNATCTTAAGGANN	NNGACCCTCAAGNN	NNGTCCAGATTGNN	NNCTCCTTACTTNN	NNCGGCTTATATNN	NNCGCTTAAGCCNN	NNGGGCTAAGTANN	NNCGTCTTATAANN	NNCTCTCAATGNN	NNCGTCTCAGGNN	NNGCTACTTTTGNN	NNCTTAGTTAAGNN	NNGCTAGTTTAANN	NNGCCCGTTAGGNN	NNAACGTTAACANN	NNACTCGTTAAGGNN	NNTGGTTAATCNN	NNTCGGGTTTAANN	NNGCCGGTTAGTNN	NNGCGGGTTACANN	NNCAGTTAACTANN	NNCCTAGTTACANN	NNCTTGTTAAGGNN	NNCTGTTAGACNN	NNGCGTGTTACGNN
	>1_TTT_RTVAA.100.133	>2_TTT_RTVSA.90.133	>4_TTC_VRVSA.91.133	>5_TTC_TRVAA.144.133	>6_TTA_VRVAA.188.133	>7_TTA_RVLRA.275.133	>8_TGT_RVVSQ.202.133	>9_TGG_KTTQD.134.133	>10_TGG_KSVMQ.111.133	>11_TGA_KSVAQ.171.133	>12_TGA_RGVAA.184.133	>13_TCT_ATVKA.244.133	>14_TCG_KGTQM.80.133	>15_TCC_RMIKS.111.133	>17_TAT_TRVSA.63.133	>18_TAG_RLTQA.140.133	>19_TAG_RMVSA.87.133	>20_TAC_QRVSA.99.133	>21_TAC_ERVSV.118.133	>22_TAA_RITAA.117.133	>23_GTT_GTRAY.182.133	>24_GTG_HLIQY.62.133	>25_GTA_YTRQV.156.133	>26_GGT_ALKNM.59.133	>27_GGT_LTKDQ.239.133	>28_GGG_RSKER.395.133	>29_GGC_TLKNQ.263.133	>30_GGA_LAKDQ.201.133	>31_GCT_KITKF.98.133	>32_GCC_VRLKY.77.133	>33_GCA_ALRQQ.74.133	>34_GAT_RTMRY.64.133	>35_GAG_VMRWY.80.133	>36_GAC_ATRRF.100.133	>37_GAA_RFQKF.54.133	>38_CTA_LHYAK.100.133	>39_CTA_IFNAK.91.133	>40_CGG_STRER.49.133	>41_CGC_RVMSR.113.133	>42_CGA_TFYAA.41.133	>43_CCT_MTNGK.192.133	>44_CCT_RGDSK.130.133	>45_CCG_RCYEK.206.133	>46_CCC_RLDSK.56.133	>47_CCA_KMTQK.481.133	>48_CCA_EHNAK.315.133	>49_CAT_LSQSR.186.133	>51_CAG_MSHWR.140.133	>52_CAC_LGMRR.172.133
	NNCCTAATTAAANN	NNCTCATTAGGGNN	NNACACTTAATANN	NNTTAATTAGCGNN	NNCTAATTAAATNN	NNTAATTAATTNN	NNGTCGCTAATGNN	NNCCCCATTAATGNN	NNCACATTAAAGNN	NNCTCATTAAGCNN	NNGCGTTAATTANN	NNCGGATTAACCNN	NNGTCCATTAAANN	NNAGGGTTAAGANN	NNCTTATTAATANN	NNTCAATTAAAGNN	NNCTCATTAAANN	NNCGCATTACTANN	NNACGTATTACTNN	NNCTTGTTAAGGNN	NNTGGCTAAGTANN	NNACGCTAAGTGNN	NNCTACTTACGGNN	NNGCGCCTTTGANN	NNGCTCCTTAAANN	NNTCCCTCAAGANN	NNGCGCCTCAATNN	NNCTCCTTAGAGNN	NNCGTCTTAGACNN	NNCGGCTTAAGANN	NNCTACTTACGNN	NNGTCTTAGGGNN	NNCCTCTCCAGANN	NNCGTCTTATAANN	NNAGTTCTTATCNN	NNCCTAGTTAATGNN	NNCCTAGTTAGCNN	NNTCCCGTTAGGNN	NNGTGTTAGCGNN	NNCTCGTTACATNN	NNCTGGTTAGGANN	NNGTTGGTTAAANN	NNTCCAGTTAAANN	NNGCGGGTTTATNN	NNACTTAACCANN	NNAGTGGTTAAGNN	NNCTTGTTAATANN	NNCCTGTTACATNN	NNATGTGCTAAANN
	>1_TTT_RTVAA.99.134	>2_TTT_RTVSA.90.134	>4_TTC_VRVSA.91.134	>5_TTC_TRVAA.143.134	>6_TTA_VRVAA.184.134	>7_TTA_RVLRA.274.134	>8_TGT_RVVSQ.201.134	>9_TGG_KTTQD.133.134	>10_TGG_KSVMQ.110.134	>11_TGA_KSVAQ.170.134	>12_TGA_RGVAA.184.134	>13_TCT_ATVKA.242.134	>14_TCG_KGTQM.80.134	>15_TCC_RMIKS.110.134	>17_TAT_TRVSA.63.134	>18_TAG_RLTQA.139.134	>19_TAG_RMVSA.87.134	>20_TAC_QRVSA.96.134	>21_TAC_ERVSV.117.134	>22_TAA_RITAA.117.134	>23_GTT_GTRAY.180.134	>24_GTG_HLIQY.62.134	>25_GTA_YTRQV.153.134	>26_GGT_ALKNM.58.134	>27_GGT_LTKDQ.237.134	>28_GGG_RSKER.383.134	>29_GGC_TLKNQ.255.134	>30_GGA_LAKDQ.197.134	>31_GCT_KITKF.98.134	>32_GCC_VRLKY.77.134	>33_GCA_ALRQQ.73.134	>34_GAT_RTMRY.63.134	>35_GAG_VMRWY.80.134	>36_GAC_ATRRF.99.134	>37_GAA_RFQKF.53.134	>38_CTA_LHYAK.99.134	>39_CTA_IFNAK.91.134	>40_CGG_STRER.48.134	>41_CGC_RVMSR.111.134	>42_CGA_TFYAA.41.134	>43_CCT_MTNGK.187.134	>44_CCT_RGDSK.128.134	>45_CCG_RCYEK.201.134	>46_CCC_RLDSK.55.134	>47_CCA_KMTQK.480.134	>48_CCA_EHNAK.314.134	>49_CAT_LSQSR.185.134	>51_CAG_MSHWR.137.134	>52_CAC_LGMRR.170.134
	NNTTAATTAGTANN	NNGTTGTTAATANN	NNACGTATTAATNN	NNCTCATTATGANN	NNTGGTTAATTANN	NNCTCATTAATTNN	NNTCAGTTAATGNN	NNCCATTATCANN	NNTGCATTAGTANN	NNTTCATTAACCNN	NNCTAATTAACNN	NNGGTCTAATCCNN	NNGCCCATTAAGANN	NNCCGGATTAGTNN	NNACTGCTAATGNN	NNTCCAATTAATNN	NNGCACATTAAANN	NNCGTATTAGCANN	NNCCGCATTAGTGNN	NNTGCTTAATTANN	NNGTGCTAAGTANN	NNCCACTTACTGNN	NNGCCCTAAGTANN	NNGTCCAGATGGNN	NNTTCCTTAATNN	NNCCCACTTAAANN	NNCACCTTAATANN	NNCCTCCTTTAGNN	NNCCTCTTAAGCNN	NNGGGCTTAAGCNN	NNCTACTTAATCNN	NNGGAGTTAAGANN	NNCCTCTTTAGANN	NNCGTCTTTATGNN	NNGGTTCTTTACNN	NNCTAGTTATCNN	NNCTAGTTAACNN	NNTTTTGACTTANN	NNGCTCTTAACANN	NNCTCGTTACGNN	NNCAAGTTAACANN	NNTGTGATATACNN	NNTGGTTATGTNN	NNCGTGTTAGTNN	NNCTAGTTAGTCNN	NNGGTAGTTATANN	NNTGCTTTAACANN	NNCCCTGTTAATNN	NNGTGTGTTTGGNN
	>1_TTT_RTVAA.97.135	>2_TTT_RTVSA.88.135	>4_TTC_VRVSA.90.135	>5_TTC_TRVAA.141.135	>6_TTA_VRVAA.183.135	>7_TTA_RVLRA.274.135	>8_TGT_RVVSQ.201.135	>9_TGG_KTTQD.130.135	>10_TGG_KSVMQ.109.135	>11_TGA_KSVAQ.168.135	>12_TGA_RGVAA.182.135	>13_TCT_ATVKA.242.135	>14_TCG_KGTQM.79.135	>15_TCC_RMIKS.109.135	>17_TAT_TRVSA.63.135	>18_TAG_RLTQA.139.135	>19_TAG_RMVSA.86.135	>20_TAC_QRVSA.96.135	>21_TAC_ERVSV.117.135	>22_TAA_RITAA.115.135	>23_GTT_GTRAY.180.135	>24_GTG_HLIQY.61.135	>25_GTA_YTRQV.151.135	>26_GGT_ALKNM.58.135	>27_GGT_LTKDQ.236.135	>28_GGG_RSKER.378.135	>29_GGC_TLKNQ.255.135	>30_GGA_LAKDQ.196.135	>31_GCT_KITKF.97.135	>32_GCC_VRLKY.76.135	>33_GCA_ALRQQ.73.135	>34_GAT_RTMRY.62.135	>35_GAG_VMRWY.80.135	>36_GAC_ATRRF.98.135	>37_GAA_RFQKF.52.135	>38_CTA_LHYAK.97.135	>39_CTA_IFNAK.91.135	>40_CGG_STRER.48.135	>41_CGC_RVMSR.109.135	>42_CGA_TFYAA.40.135	>43_CCT_MTNGK.177.135	>44_CCT_RGDSK.127.135	>45_CCG_RCYEK.199.135	>46_CCC_RLDSK.54.135	>47_CCA_KMTQK.476.135	>48_CCA_EHNAK.313.135	>49_CAT_LSQSR.184.135	>51_CAG_MSHWR.136.135	>52_CAC_LGMRR.168.135
	NNATCGTAGATTNN	NNCTAATTAGGTNN	NNCGAATTAATGNN	NNGTAATTAAGANN	NNACTGCAAAAGNN	NNTCTAATTAAANN	NNGCACATAATGNN	NNCCCATTACGGNN	NNTCCATTATGANN	NNTCTCATTAGANN	NNCCCATTAATGNN	NNACTGCAAAAGNN	NNGCCCATTAATNN	NNAGACTAATCCNN	NNCGTCCAGATTGNN	NNCTCATTAATANN	NNCCCCTTAATGNN	NNTTCACTAATANN	NNTCGTATTAGTNN	NNCTAATTATCTNN	NNGACCTAAGTANN	NNCCACTTATGGNN	NNAGGTTAAGTANN	NNCGCCTTAGACNN	NNTCTCCTTATCNN	NNCCACTTAGGANN	NNCACCTTAAGANN	NNCCTCCTTAACNN	NNATCAGTCCTTNN	NNGACTTAAGCTNN	NNTGATTAAGTANN	NNCCACTTAAGANN	NNCCTCTCAGTGNN	NNCGTCTTTACNN	NNATTCCGCTCTNN	NNGGTGGTTAATNN	NNAGGGTTAAGANN	NNTCCCTGACGGNN	NNCATGTTAAGTNN	NNAGTCGTTATCNN	NNTCTAGTTAAANN	NNACAGGTTAACNN	NNCCGGTTATAGNN	NNTTGGTTAATCNN	NNTCGCTAACCANN	NNTATGGTTAAGNN	NNAAAGTTAACANN	NNCCTGTTACCANN	NNTGTGCTAAAGNN
	>1_TTT_RTVAA.97.136	>2_TTT_RTVSA.87.136	>4_TTC_VRVSA.90.136	>5_TTC_TRVAA.141.136	>6_TTA_VRVAA.183.136	>7_TTA_RVLRA.271.136	>8_TGT_RVVSQ.198.136	>9_TGG_KTTQD.127.136	>10_TGG_KSVMQ.108.136	>11_TGA_KSVAQ.162.136	>12_TGA_RGVAA.180.136	>13_TCT_ATVKA.241.136	>14_TCG_KGTQM.79.136	>15_TCC_RMIKS.109.136	>17_TAT_TRVSA.63.136	>18_TAG_RLTQA.139.136	>19_TAG_RMVSA.85.136	>20_TAC_QRVSA.95.136	>21_TAC_ERVSV.117.136	>22_TAA_RITAA.114.136	>23_GTT_GTRAY.180.136	>24_GTG_HLIQY.60.136	>25_GTA_YTRQV.151.136	>26_GGT_ALKNM.57.136	>27_GGT_LTKDQ.230.136	>28_GGG_RSKER.377.136	>29_GGC_TLKNQ.253.136	>30_GGA_LAKDQ.196.136	>31_GCT_KITKF.96.136	>32_GCC_VRLKY.76.136	>33_GCA_ALRQQ.72.136	>34_GAT_RTMRY.60.136	>35_GAG_VMRWY.80.136	>36_GAC_ATRRF.98.136	>37_GAA_RFQKF.50.136	>38_CTA_LHYAK.97.136	>39_CTA_IFNAK.90.136	>40_CGG_STRER.47.136	>41_CGC_RVMSR.108.136	>42_CGA_TFYAA.40.136	>43_CCT_MTNGK.175.136	>44_CCT_RGDSK.127.136	>45_CCG_RCYEK.198.136	>46_CCC_RLDSK.53.136	>47_CCA_KMTQK.472.136	>48_CCA_EHNAK.308.136	>49_CAT_LSQSR.184.136	>51_CAG_MSHWR.134.136	>52_CAC_LGMRR.168.136
	NNCATTAATAACNN	NNCGTATTAGTANN	NNCGTATTATATNN	NNCTCTTAATTANN	NNGCGTTAATTANN	NNACCGTAATTANN	NNCTCATTATTANN	NNGCCCATTAGTGNN	NNTCATTAACGNN	NNCTAATTAGAGNN	NNGCTAATTAAGNN	NNTGACTAATCCNN	NNGTCCAGCTTGNN	NNTGACTAATCCNN	NNGTCCCGATTGNN	NNCTCATTAACANN	NNAATGCTAATGNN	NNGCGCATTATCNN	NNTCGCATTATGNN	NNGTCCAGCTTGNN	NNAACCTAAGTANN	NNGCCACTTAGGNN	NNCTTCTAAGTANN	NNGTCCAGAGTGNN	NNCTCCTTAGGTNN	NNTTCTTAAGGGNN	NNCGCCTTAACCNN	NNGTTTTAAGGANN	NNTTGCTTAAGCNN	NNACACTAAGCCNN	NNGAACTAAGTANN	NNTGTCTTAGTGNN	NNCCTCTTCAANN	NNGCGTCTTTAGNN	NNCTTCTTAATCNN	NNCTAGTTACGTNN	NNCTAGTTAAANN	NNTCCGTTATGTNN	NNCCTGTTAACANN	NNGCTCGTTAACCNN	NNCTTGGTTATANN	NNGCTGGTTATCNN	NNATCGGTTAAGNN	NNATCCAGATTGNN	NNAGCCTAACTANN	NNCCCTTAACCANN	NNAACCTTAACANN	NNCCTGTCAAGTNN	NNCGTGTCAAGGNN
	>1_TTT_RTVAA.97.137	>2_TTT_RTVSA.87.137	>4_TTC_VRVSA.90.137	>5_TTC_TRVAA.138.137	>6_TTA_VRVAA.183.137	>7_TTA_RVLRA.270.137	>8_TGT_RVVSQ.197.137	>9_TGG_KTTQD.127.137	>10_TGG_KSVMQ.106.137	>11_TGA_KSVAQ.162.137	>12_TGA_RGVAA.178.137	>13_TCT_ATVKA.239.137	>14_TCG_KGTQM.78.137	>15_TCC_RMIKS.109.137	>17_TAT_TRVSA.62.137	>18_TAG_RLTQA.138.137	>19_TAG_RMVSA.85.137	>20_TAC_QRVSA.95.137	>21_TAC_ERVSV.117.137	>22_TAA_RITAA.112.137	>23_GTT_GTRAY.178.137	>24_GTG_HLIQY.60.137	>25_GTA_YTRQV.149.137	>26_GGT_ALKNM.56.137	>27_GGT_LTKDQ.229.137	>28_GGG_RSKER.375.137	>29_GGC_TLKNQ.253.137	>30_GGA_LAKDQ.194.137	>31_GCT_KITKF.96.137	>32_GCC_VRLKY.75.137	>33_GCA_ALRQQ.71.137	>34_GAT_RTMRY.60.137	>35_GAG_VMRWY.80.137	>36_GAC_ATRRF.97.137	>37_GAA_RFQKF.48.137	>38_CTA_LHYAK.97.137	>39_CTA_IFNAK.89.137	>40_CGG_STRER.47.137	>41_CGC_RVMSR.108.137	>42_CGA_TFYAA.40.137	>43_CCT_MTNGK.175.137	>44_CCT_RGDSK.124.137	>45_CCG_RCYEK.196.137	>46_CCC_RLDSK.53.137	>47_CCA_KMTQK.470.137	>48_CCA_EHNAK.305.137	>49_CAT_LSQSR.183.137	>51_CAG_MSHWR.132.137	>52_CAC_LGMRR.164.137
	NNCTAATTAGCCNN	NNTAATTAGAGNN	NNCGTCTTAATANN	NNCTTCTAATTANN	NNTCATTAGTANN	NNCTCTTAATTANN	NNAGTACTAATGNN	NNTCCATTAGAANN	NNTCCATTATCANN	NNCTCATTACGTNN	NNCTAATTATAANN	NNCGGATTATGCNN	NNCCCATTAAACNN	NNCGGATTAACGNN	NNCGTATTACTCNN	NNCCTAATTAAGNN	NNTTAATTAAGTNN	NNCGTATTACTTNN	NNGCTAATTAATNN	NNAATTAACCTANN	NNGCACTAAGTANN	NNCCCCTAAGTGNN	NNGTCTAAGTANN	NNCGCCTTACANN	NNCTCCTTTGGANN	NNGGTTTAAGGGNN	NNTGCCTTAAGGNN	NNCTTCCTTATTNN	NNAGCTTAAGCCNN	NNTCCTGACAGTNN	NNCATACTTAAANN	NNGCGTCTTATANN	NNTCCTCTTCACNN	NNGCGTCTTAATNN	NNGCTACTCAAANN	NNTCCTGACAGTNN	NNACTAGTTAAGANN	NNATCCGTCTTCNN	NNTCGTGTTACANN	NNCCTCGTTAGTCNN	NNTTCGGTTAACNN	NNGATGGTTATCNN	NNCCGGTTAGGTNN	NNCCCTAACATGNN	NNATGGTTAATGNN	NNACTAGTTAGANN	NNTAGCTTAACANN	NNACTGTTAACANN	NNGCGTGTAATGNN
	>1_TTT_RTVAA.97.138	>2_TTT_RTVSA.86.138	>4_TTC_VRVSA.90.138	>5_TTC_TRVAA.138.138	>6_TTA_VRVAA.180.138	>7_TTA_RVLRA.267.138	>8_TGT_RVVSQ.196.138	>9_TGG_KTTQD.127.138	>10_TGG_KSVMQ.106.138	>11_TGA_KSVAQ.162.138	>12_TGA_RGVAA.178.138	>13_TCT_ATVKA.239.138	>14_TCG_KGTQM.78.138	>15_TCC_RMIKS.109.138	>17_TAT_TRVSA.62.138	>18_TAG_RLTQA.137.138	>19_TAG_RMVSA.83.138	>20_TAC_QRVSA.94.138	>21_TAC_ERVSV.117.138	>22_TAA_RITAA.110.138	>23_GTT_GTRAY.177.138	>24_GTG_HLIQY.60.138	>25_GTA_YTRQV.148.138	>26_GGT_ALKNM.55.138	>27_GGT_LTKDQ.223.138	>28_GGG_RSKER.375.138	>29_GGC_TLKNQ.248.138	>30_GGA_LAKDQ.194.138	>31_GCT_KITKF.95.138	>32_GCC_VRLKY.75.138	>33_GCA_ALRQQ.71.138	>34_GAT_RTMRY.58.138	>35_GAG_VMRWY.79.138	>36_GAC_ATRRF.96.138	>37_GAA_RFQKF.48.138	>38_CTA_LHYAK.94.138	>39_CTA_IFNAK.88.138	>40_CGG_STRER.46.138	>41_CGC_RVMSR.108.138	>42_CGA_TFYAA.39.138	>43_CCT_MTNGK.172.138	>44_CCT_RGDSK.124.138	>45_CCG_RCYEK.195.138	>46_CCC_RLDSK.52.138	>47_CCA_KMTQK.467.138	>48_CCA_EHNAK.303.138	>49_CAT_LSQSR.182.138	>51_CAG_MSHWR.132.138	>52_CAC_LGMRR.164.138
	NNTTAATTAGTCNN	NNTGCGTTAATTNN	NNCGTATTACTGNN	NNACTCTAATTANN	NNCTTATTAGCCNN	NNTTCATTAACANN	NNAACGCTAATGNN	NNCCATTATTANN	NNCCAATTAGTANN	NNTTCATTATAGNN	NNTTTAATTAAGNN	NNGGATTAGATNN	NNTCCATTAAAGNN	NNCGGATTATAANN	NNTTAATTAATANN	NNCCAATTATCTNN	NNCTCATTAAAGNN	NNCTCATTAGCGNN	NNCCGCATTATCNN	NNCTTATTAGCANN	NNGGCTTAAGTANN	NNGGTCTAAGTGNN	NNGCGATAAGTANN	NNCGCCTTAATTNN	NNACTCCTTAACNN	NNGTCCCTTAATNN	NNCGCCTTTATANN	NNATCCTAAGGANN	NNGGTTTTAAGCNN	NNGTGCTAAGAANN	NNAGTCTGAGTANN	NNCGTCTTAGANN	NNTTTCAAGTCANN	NNCGTCTTGTCANN	NNACTTCTTAGGNN	NNTCTAGTTAAGANN	NNTCTAGTTAGANN	NNACCGTTAGTANN	NNTCACTTAACANN	NNGCTCGTTAGAANN	NNCTGGTTAAGTNN	NNCCGGGTTTAGNN	NNCCAGTTAGTGNN	NNGTAGCCAATGNN	NNTGTTTAACTANN	NNTTGCTAACCANN	NNTGTTTTAACANN	NNCCTGTTTATTNN	NNCGTGTTAGTTNN
	>1_TTT_RTVAA.97.139	>2_TTT_RTVSA.86.139	>4_TTC_VRVSA.89.139	>5_TTC_TRVAA.136.139	>6_TTA_VRVAA.180.139	>7_TTA_RVLRA.266.139	>8_TGT_RVVSQ.196.139	>9_TGG_KTTQD.126.139	>10_TGG_KSVMQ.105.139	>11_TGA_KSVAQ.162.139	>12_TGA_RGVAA.177.139	>13_TCT_ATVKA.236.139	>14_TCG_KGTQM.77.139	>15_TCC_RMIKS.109.139	>17_TAT_TRVSA.61.139	>18_TAG_RLTQA.137.139	>19_TAG_RMVSA.82.139	>20_TAC_QRVSA.93.139	>21_TAC_ERVSV.116.139	>22_TAA_RITAA.110.139	>23_GTT_GTRAY.176.139	>24_GTG_HLIQY.59.139	>25_GTA_YTRQV.148.139	>26_GGT_ALKNM.55.139	>27_GGT_LTKDQ.220.139	>28_GGG_RSKER.373.139	>29_GGC_TLKNQ.248.139	>30_GGA_LAKDQ.193.139	>31_GCT_KITKF.95.139	>32_GCC_VRLKY.74.139	>33_GCA_ALRQQ.71.139	>34_GAT_RTMRY.58.139	>35_GAG_VMRWY.79.139	>36_GAC_ATRRF.95.139	>37_GAA_RFQKF.48.139	>38_CTA_LHYAK.94.139	>39_CTA_IFNAK.87.139	>40_CGG_STRER.45.139	>41_CGC_RVMSR.108.139	>42_CGA_TFYAA.39.139	>43_CCT_MTNGK.171.139	>44_CCT_RGDSK.121.139	>45_CCG_RCYEK.193.139	>46_CCC_RLDSK.52.139	>47_CCA_KMTQK.461.139	>48_CCA_EHNAK.302.139	>49_CAT_LSQSR.182.139	>51_CAG_MSHWR.131.139	>52_CAC_LGMRR.163.139
	NNGTTAATTAGTNN	NNCACATTAATTNN	NNCGCATTAGAGNN	NNGCTCTAATTANN	NNCCTAATTATGANN	NNATCCTAATTANN	NNCACATTAGAGNN	NNACCCATTAAGNN	NNTCATTATGGNN	NNGCTAATTAAANN	NNCTAATTATCNN	NNAGGATTATAANN	NNCCCATTATGNN	NNCGACTAATCCNN	NNGTATTAACCNN	NNCCTATTATTANN	NNTTACTTAATGNN	NNACGCATTAAGNN	NNCGCATTATCTNN	NNCTTATTAGTGNN	NNCTACTTATTGNN	NNGTTGTAAGTGNN	NNGCTACTTATGNN	NNCTAATTAGGGNN	NNGCTCCTTAAGNN	NNCCCCTTACGANN	NNCCGCCTTAGGGNN	NNCTCCTTACCANN	NNTTTCTTAAGCNN	NNCCGTTAAGCCNN	NNCGCTAAGTANN	NNGCGTCTTAGTNN	NNCCTCTCACCANN	NNCCGTCTTAACGNN	NNCCTACTTAATNN	NNGCTAGTTAAATNN	NNACTCGTTAGGNN	NNTCCCGTTAGCNN	NNTGTCTTAACANN	NNCCTCGTTAGGGNN	NNGTAGGTTATGNN	NNACAGGTTAAANN	NNTCAGTTAGTGNN	NNTTTCCAGGTANN	NNGCTCGTTAATNN	NNAACTTAACTANN	NNGATGCTAACANN	NNCCTATCAGCNN	NNTGTGTCAAANN
	>1_TTT_RTVAA.95.140	>2_TTT_RTVSA.86.140	>4_TTC_VRVSA.89.140	>5_TTC_TRVAA.134.140	>6_TTA_VRVAA.178.140	>7_TTA_RVLRA.265.140	>8_TGT_RVVSQ.196.140	>9_TGG_KTTQD.125.140	>10_TGG_KSVMQ.103.140	>11_TGA_KSVAQ.161.140	>12_TGA_RGVAA.177.140	>13_TCT_ATVKA.236.140	>14_TCG_KGTQM.77.140	>15_TCC_RMIKS.108.140	>17_TAT_TRVSA.61.140	>18_TAG_RLTQA.136.140	>19_TAG_RMVSA.82.140	>20_TAC_QRVSA.91.140	>21_TAC_ERVSV.116.140	>22_TAA_RITAA.108.140	>23_GTT_GTRAY.173.140	>24_GTG_HLIQY.59.140	>25_GTA_YTRQV.147.140	>26_GGT_ALKNM.55.140	>27_GGT_LTKDQ.220.140	>28_GGG_RSKER.368.140	>29_GGC_TLKNQ.243.140	>30_GGA_LAKDQ.192.140	>31_GCT_KITKF.95.140	>32_GCC_VRLKY.73.140	>33_GCA_ALRQQ.70.140	>34_GAT_RTMRY.58.140	>35_GAG_VMRWY.77.140	>36_GAC_ATRRF.94.140	>37_GAA_RFQKF.48.140	>38_CTA_LHYAK.94.140	>39_CTA_IFNAK.86.140	>40_CGG_STRER.45.140	>41_CGC_RVMSR.107.140	>42_CGA_TFYAA.38.140	>43_CCT_MTNGK.170.140	>44_CCT_RGDSK.119.140	>45_CCG_RCYEK.192.140	>46_CCC_RLDSK.52.140	>47_CCA_KMTQK.449.140	>48_CCA_EHNAK.297.140	>49_CAT_LSQSR.180.140	>51_CAG_MSHWR.131.140	>52_CAC_LGMRR.159.140
	NNCCTAATTAGGNN	NNCTAATTAATTNN	NNCTAATTAGAGNN	NNATCTTATTACNN	NNTAATTAAGTNN	NNTCTAATTAGANN	NNCGCGTTAATGNN	NNGCCCATTAAGGNN	NNTTCATTAGTANN	NNCTCATTATTGNN	NNCCTCATTAATNN	NNAGGATTAAACNN	NNTCCATTAGAGNN	NNATCTTAATCCNN	NNTACACTAATGNN	NNCTTATTAATANN	NNGTTGTTAATANN	NNTGAATTAATANN	NNCGCATTAGAGNN	NNTGATTCAAGNN	NNTCGTTAAGTANN	NNCCCTCTTAAGNN	NNCTACTTATTGNN	NNCACCTTAAGNN	NNCTCCTTACCANN	NNGTCCCTTAGANN	NNACGCCTTAGTNN	NNCTCCTTTATANN	NNTATTTAAGACNN	NNGGGGCTTAAANN	NNTTCATAAGTANN	NNGCGTCTTAATNN	NNCCTCTTCTAANN	NNGCGTCTTAGANN	NNTTGTTAAGAANN	NNGCTAGTCATGNN	NNCTCGTTAACCNN	NNTCCGTTAGTTNN	NNTGCGTTAATANN	NNTTGTTAATANN	NNCTTGGTTAATNN	NNCGTGTTAGTNN	NNGCCGGTTATANN	NNGCGGGTTCACNN	NNGCTGGTTACGNN	NNAAGCCTAAAANN	NNCGTGTTAGGANN	NNCCTGTCAAGNN	NNTCGTGTCAACNN
	>1_TTT_RTVAA.94.141	>2_TTT_RTVSA.85.141	>4_TTC_VRVSA.89.141	>5_TTC_TRVAA.134.141	>6_TTA_VRVAA.178.141	>7_TTA_RVLRA.262.141	>8_TGT_RVVSQ.195.141	>9_TGG_KTTQD.124.141	>10_TGG_KSVMQ.102.141	>11_TGA_KSVAQ.158.141	>12_TGA_RGVAA.172.141	>13_TCT_ATVKA.231.141	>14_TCG_KGTQM.76.141	>15_TCC_RMIKS.108.141	>17_TAT_TRVSA.60.141	>18_TAG_RLTQA.136.141	>19_TAG_RMVSA.80.141	>20_TAC_QRVSA.90.141	>21_TAC_ERVSV.116.141	>22_TAA_RITAA.107.141	>23_GTT_GTRAY.173.141	>24_GTG_HLIQY.59.141	>25_GTA_YTRQV.147.141	>26_GGT_ALKNM.54.141	>27_GGT_LTKDQ.218.141	>28_GGG_RSKER.365.141	>29_GGC_TLKNQ.242.141	>30_GGA_LAKDQ.192.141	>31_GCT_KITKF.95.141	>32_GCC_VRLKY.73.141	>33_GCA_ALRQQ.70.141	>34_GAT_RTMRY.57.141	>35_GAG_VMRWY.77.141	>36_GAC_ATRRF.93.141	>37_GAA_RFQKF.47.141	>38_CTA_LHYAK.94.141	>39_CTA_IFNAK.85.141	>40_CGG_STRER.44.141	>41_CGC_RVMSR.106.141	>42_CGA_TFYAA.38.141	>43_CCT_MTNGK.168.141	>44_CCT_RGDSK.117.141	>45_CCG_RCYEK.189.141	>46_CCC_RLDSK.51.141	>47_CCA_KMTQK.435.141	>48_CCA_EHNAK.294.141	>49_CAT_LSQSR.180.141	>51_CAG_MSHWR.130.141	>52_CAC_LGMRR.158.141
	NNTAATTAAGTNN	NNCACATTAAGGNN	NNCGCATTAAAANN	NNATTATAATTANN	NNCTCATTATGNN	NNCGGCTAATTANN	NNACTCATAATGNN	NNTCCATTATCANN	NNTCATTAAAGNN	NNGTTCATTAACNN	NNCTTAATTAAANN	NNGGATTAGGANN	NNTCAATTAATANN	NNGAATTAATCCNN	NNCGCATTAGTANN	NNGCCAATTAAANN	NNCAAATTAATGNN	NNCACATTAGCANN	NNTGTATTAGCGNN	NNGTCCAGATTANN	NNGAGATAAGTANN	NNTCTGTAAGTGNN	NNACTGTAAGTANN	NNGCACCTTAGTGNN	NNATCCTTAAGGNN	NNCCACTTAGGGNN	NNACGCCTTAACANN	NNAACCTAAGGANN	NNAGCTTAGTANN	NNGGCTAAAGCCNN	NNTACTTAGACNN	NNGCGTCTTACANN	NNACCTCTCAGGNN	NNCGTCTTCAATNN	NNTTTTTAAGAANN	NNTCTAGTTAGCANN	NNACTGCAAAAGNN	NNGCCCGTTAACANN	NNCTACTTAACANN	NNGCTCGTTAGCANN	NNCCAGGTTAAGNN	NNCGGGTTACCANN	NNCTTGGTTAACNN	NNACAAAGTTCANN	NNCGTTTAACCANN	NNCCTAGTTACGNN	NNGCGTGTTAGANN	NNGCCTGTTTGGNN	NNTGTGTTAATCNN
	>1_TTT_RTVAA.93.142	>2_TTT_RTVSA.84.142	>4_TTC_VRVSA.88.142	>5_TTC_TRVAA.133.142	>6_TTA_VRVAA.177.142	>7_TTA_RVLRA.255.142	>8_TGT_RVVSQ.194.142	>9_TGG_KTTQD.122.142	>10_TGG_KSVMQ.101.142	>11_TGA_KSVAQ.157.142	>12_TGA_RGVAA.164.142	>13_TCT_ATVKA.231.142	>14_TCG_KGTQM.76.142	>15_TCC_RMIKS.107.142	>17_TAT_TRVSA.60.142	>18_TAG_RLTQA.135.142	>19_TAG_RMVSA.80.142	>20_TAC_QRVSA.90.142	>21_TAC_ERVSV.115.142	>22_TAA_RITAA.107.142	>23_GTT_GTRAY.169.142	>24_GTG_HLIQY.59.142	>25_GTA_YTRQV.147.142	>26_GGT_ALKNM.53.142	>27_GGT_LTKDQ.218.142	>28_GGG_RSKER.364.142	>29_GGC_TLKNQ.241.142	>30_GGA_LAKDQ.192.142	>31_GCT_KITKF.94.142	>32_GCC_VRLKY.72.142	>33_GCA_ALRQQ.70.142	>34_GAT_RTMRY.57.142	>35_GAG_VMRWY.77.142	>36_GAC_ATRRF.92.142	>37_GAA_RFQKF.46.142	>38_CTA_LHYAK.94.142	>39_CTA_IFNAK.85.142	>40_CGG_STRER.44.142	>41_CGC_RVMSR.106.142	>42_CGA_TFYAA.37.142	>43_CCT_MTNGK.167.142	>44_CCT_RGDSK.112.142	>45_CCG_RCYEK.186.142	>46_CCC_RLDSK.51.142	>47_CCA_KMTQK.429.142	>48_CCA_EHNAK.294.142	>49_CAT_LSQSR.179.142	>51_CAG_MSHWR.128.142	>52_CAC_LGMRR.157.142
	NNGTTCATTAACNN	NNCTCATTAAAANN	NNCATTGTACTANN	NNGTGATAATTANN	NNCCTAATTATTNN	NNTAATTAACGNN	NNTCCTCTAATGNN	NNCCCATTATCNN	NNCACATTAGAGNN	NNTCATTAACGNN	NNTCTCATTAAGNN	NNTTGTTAATCCNN	NNTCCCATTAAGANN	NNCCGGATTACGNN	NNGTCCAGAGTGNN	NNTCAATTAACTNN	NNCTTATTAATTNN	NNCGTATTAACGNN	NNCCGCATTACANN	NNCTAATTATTTNN	NNCTACTTAAATNN	NNGACCTAAGTGNN	NNCATCTAAGTANN	NNGCACCTCAAGNN	NNCTCCTTTAGNN	NNCCCCTTACCANN	NNGCGCCTTCAGNN	NNTTCCTTATCNN	NNCGTCTTATGGNN	NNTCCGTAAGCCNN	NNCTACTTAAACNN	NNTTCGCTAAGANN	NNACCTCTCCAGNN	NNCCGTCTTAAANN	NNGCTTCTTAGTGNN	NNGCTGGTTATGNN	NNGCTAGTCAACNN	NNTTTGAAGCATNN	NNCGTGTTAGCANN	NNTCGTTAGAANN	NNCGGGTTAGCANN	NNTTGGGTTAACNN	NNTCCCCCCGAGNN	NNTTGACACATCNN	NNGATTAACTANN	NNGATGGTTAGCNN	NNTCCCTTAACANN	NNCCTGTTACTCNN	NNCGTGTTAAGNN
	>1_TTT_RTVAA.93.143	>2_TTT_RTVSA.84.143	>4_TTC_VRVSA.87.143	>5_TTC_TRVAA.133.143	>6_TTA_VRVAA.177.143	>7_TTA_RVLRA.253.143	>8_TGT_RVVSQ.193.143	>9_TGG_KTTQD.122.143	>10_TGG_KSVMQ.99.143	>11_TGA_KSVAQ.157.143	>12_TGA_RGVAA.163.143	>13_TCT_ATVKA.229.143	>14_TCG_KGTQM.75.143	>15_TCC_RMIKS.107.143	>17_TAT_TRVSA.59.143	>18_TAG_RLTQA.130.143	>19_TAG_RMVSA.80.143	>20_TAC_QRVSA.89.143	>21_TAC_ERVSV.115.143	>22_TAA_RITAA.103.143	>23_GTT_GTRAY.165.143	>24_GTG_HLIQY.56.143	>25_GTA_YTRQV.145.143	>26_GGT_ALKNM.53.143	>27_GGT_LTKDQ.216.143	>28_GGG_RSKER.362.143	>29_GGC_TLKNQ.240.143	>30_GGA_LAKDQ.189.143	>31_GCT_KITKF.94.143	>32_GCC_VRLKY.71.143	>33_GCA_ALRQQ.70.143	>34_GAT_RTMRY.57.143	>35_GAG_VMRWY.75.143	>36_GAC_ATRRF.92.143	>37_GAA_RFQKF.46.143	>38_CTA_LHYAK.94.143	>39_CTA_IFNAK.83.143	>40_CGG_STRER.43.143	>41_CGC_RVMSR.106.143	>42_CGA_TFYAA.37.143	>43_CCT_MTNGK.164.143	>44_CCT_RGDSK.112.143	>45_CCG_RCYEK.184.143	>46_CCC_RLDSK.51.143	>47_CCA_KMTQK.423.143	>48_CCA_EHNAK.292.143	>49_CAT_LSQSR.179.143	>51_CAG_MSHWR.128.143	>52_CAC_LGMRR.156.143
	NNGCTAATTATANN	NNCTCATTAGAGNN	NNCTCACTAATANN	NNTTCATTAAGANN	NNTAATTAGAGNN	NNTAATTATGANN	NNTGACATAATGNN	NNCCCATTACCGNN	NNCTCATTAATTNN	NNTAATTATGANN	NNGCTCATCGTTNN	NNTGGATTAGTGNN	NNGCCCAGATTGNN	NNATGCTAATCCNN	NNTAATTAACANN	NNGCCTATTAAGNN	NNTAATTATGANN	NNCGTGTTAATANN	NNCGTATTACATNN	NNCTCATTATAGNN	NNAATGTAAGTANN	NNGGCACTTAACNN	NNTTTTAAGTANN	NNCCGCCTCAATNN	NNGTCCTAAGGANN	NNTCTCTAAGGGNN	NNGCGCCTTAATANN	NNACCTTAAGGANN	NNCGGCTTAAAANN	NNCGTCTTACGANN	NNGGACTAAGTANN	NNCGTCACTAAGANN	NNACCTCTTCAANN	NNCGTCTTACCTNN	NNCTACTTAAGGNN	NNCTAGTTATAGNN	NNGATAGTTAACNN	NNCCCGTTATAANN	NNCCGTGTTACANN	NNCTCGTTACTANN	NNGAAGGTTAGTNN	NNCGGGTTAGANN	NNGTCGGTTAAGNN	NNGCGGGTTTACNN	NNCAGTTAACCANN	NNGCTAGTCAAGNN	NNCTGCTTAACANN	NNCCTGTCAGTGNN	NNGTGTGTCACCNN
	>1_TTT_RTVAA.92.144	>2_TTT_RTVSA.84.144	>4_TTC_VRVSA.87.144	>5_TTC_TRVAA.132.144	>6_TTA_VRVAA.172.144	>7_TTA_RVLRA.251.144	>8_TGT_RVVSQ.190.144	>9_TGG_KTTQD.122.144	>10_TGG_KSVMQ.98.144	>11_TGA_KSVAQ.155.144	>12_TGA_RGVAA.160.144	>13_TCT_ATVKA.226.144	>14_TCG_KGTQM.75.144	>15_TCC_RMIKS.106.144	>17_TAT_TRVSA.59.144	>18_TAG_RLTQA.127.144	>19_TAG_RMVSA.80.144	>20_TAC_QRVSA.89.144	>21_TAC_ERVSV.115.144	>22_TAA_RITAA.102.144	>23_GTT_GTRAY.165.144	>24_GTG_HLIQY.56.144	>25_GTA_YTRQV.144.144	>26_GGT_ALKNM.53.144	>27_GGT_LTKDQ.213.144	>28_GGG_RSKER.357.144	>29_GGC_TLKNQ.240.144	>30_GGA_LAKDQ.186.144	>31_GCT_KITKF.94.144	>32_GCC_VRLKY.70.144	>33_GCA_ALRQQ.70.144	>34_GAT_RTMRY.57.144	>35_GAG_VMRWY.74.144	>36_GAC_ATRRF.92.144	>37_GAA_RFQKF.46.144	>38_CTA_LHYAK.92.144	>39_CTA_IFNAK.78.144	>40_CGG_STRER.42.144	>41_CGC_RVMSR.106.144	>42_CGA_TFYAA.36.144	>43_CCT_MTNGK.163.144	>44_CCT_RGDSK.111.144	>45_CCG_RCYEK.183.144	>46_CCC_RLDSK.50.144	>47_CCA_KMTQK.419.144	>48_CCA_EHNAK.289.144	>49_CAT_LSQSR.177.144	>51_CAG_MSHWR.127.144	>52_CAC_LGMRR.155.144
	NNCTCATTAACTNN	NNCGAATTAATANN	NNTCGCATTAATNN	NNGCTCATTAAGNN	NNCTCATTATGTNN	NNTCTAATTATCNN	NNCATCTTAATGNN	NNCCCCATTAGTANN	NNCCCCATTAAGNN	NNTTCATTACTGNN	NNTCTAATTATCNN	NNACGGATTAACNN	NNGCCCATTAGANN	NNGTGGATTAAGNN	NNCGCATTAGAANN	NNCCCAATTAATANN	NNCGTATTAACANN	NNCTCATTATGANN	NNGCGCATTAAGNN	NNTTGTTAATTANN	NNCTACTTGAAANN	NNGCCACTTGAGNN	NNAACTTAAGTANN	NNACGCCTTATGNN	NNTTCCTTAATCNN	NNGCCCCTTACANN	NNCGCCTTACGGNN	NNTCTTTAAGGANN	NNCTGCTAAGAANN	NNGAGCTAAGCCNN	NNGCCATAAGTANN	NNGTCTTAGGANN	NNCCTCTCCAANN	NNGCGTCTTCATNN	NNGGTACTTAAANN	NNCCTAGTTAAAANN	NNGCTGGTTAACNN	NNGTCCGTTACTNN	NNCGCGTTAGTANN	NNACTCGTTAGAANN	NNGTTGGTTATANN	NNCAGGTTAACGNN	NNGTCAGTTAAANN	NNNTCCAGATTGNN	NNGGTGGTTAATNN	NNCTGGTTAATGNN	NNTACCTTAACANN	NNCTGTCAAGCNN	NNCTGTGTAAAANN
	>1_TTT_RTVAA.92.145	>2_TTT_RTVSA.83.145	>4_TTC_VRVSA.87.145	>5_TTC_TRVAA.131.145	>6_TTA_VRVAA.168.145	>7_TTA_RVLRA.251.145	>8_TGT_RVVSQ.189.145	>9_TGG_KTTQD.121.145	>10_TGG_KSVMQ.98.145	>11_TGA_KSVAQ.152.145	>12_TGA_RGVAA.159.145	>13_TCT_ATVKA.223.145	>14_TCG_KGTQM.75.145	>15_TCC_RMIKS.106.145	>17_TAT_TRVSA.58.145	>18_TAG_RLTQA.126.145	>19_TAG_RMVSA.79.145	>20_TAC_QRVSA.88.145	>21_TAC_ERVSV.114.145	>22_TAA_RITAA.101.145	>23_GTT_GTRAY.165.145	>24_GTG_HLIQY.56.145	>25_GTA_YTRQV.143.145	>26_GGT_ALKNM.53.145	>27_GGT_LTKDQ.210.145	>28_GGG_RSKER.355.145	>29_GGC_TLKNQ.238.145	>30_GGA_LAKDQ.185.145	>31_GCT_KITKF.94.145	>32_GCC_VRLKY.68.145	>33_GCA_ALRQQ.69.145	>34_GAT_RTMRY.56.145	>35_GAG_VMRWY.74.145	>36_GAC_ATRRF.92.145	>37_GAA_RFQKF.46.145	>38_CTA_LHYAK.91.145	>39_CTA_IFNAK.78.145	>40_CGG_STRER.42.145	>41_CGC_RVMSR.106.145	>42_CGA_TFYAA.36.145	>43_CCT_MTNGK.160.145	>44_CCT_RGDSK.111.145	>45_CCG_RCYEK.179.145	>46_CCC_RLDSK.50.145	>47_CCA_KMTQK.419.145	>48_CCA_EHNAK.289.145	>49_CAT_LSQSR.176.145	>51_CAG_MSHWR.126.145	>52_CAC_LGMRR.155.145
	NNTTCATTAAGGNN	NNCAACTTAATANN	NNTGCTTAATTANN	NNGTTCTAATTANN	NNTCACTAATTANN	NNTGACTAATTANN	NNAGAGATAATGNN	NNCCCATTATTANN	NNACTCATTAAANN	NNTTCATTATTANN	NNCTAATTATCTNN	NNGGATAATCCNN	NNCCATTATGANN	NNGATGCTAAACNN	NNACGCATTAAGNN	NNATCAATTAAANN	NNCGTATTATCANN	NNTACATTAATANN	NNACGTATTAAGNN	NNATCGTAGATTNN	NNCTGATAAGTANN	NNTGCCTAAGTANN	NNGTTTTAAGTANN	NNTCGCCTTAACANN	NNCTCCTTATGTNN	NNGCCCCTTATANN	NNCCGCCTTAAACNN	NNCCTCCTTAAANN	NNGCGGCTTATGNN	NNTTGCTAAGCCNN	NNACTTTGAGTANN	NNACACTTAAGANN	NNCCTCTCCAATNN	NNGCGTCTCAACNN	NNGCTTAAGAANN	NNCTAGTTATGCNN	NNCTAGTTAAAANN	NNCCGAGTAAGANN	NNCGTGTTAGTTNN	NNCTCGTTACTGNN	NNATTCGTTAAGNN	NNGCTGGTTAGANN	NNTCGGTTAGTCNN	NNCATCGCTATGNN	NNGTGCTAACCANN	NNACTGGTTATGNN	NNTTATTTAACANN	NNGCCTGTCAACNN	NNGTGTGTTAGCNN
	>1_TTT_RTVAA.90.146	>2_TTT_RTVSA.83.146	>4_TTC_VRVSA.86.146	>5_TTC_TRVAA.131.146	>6_TTA_VRVAA.167.146	>7_TTA_RVLRA.250.146	>8_TGT_RVVSQ.188.146	>9_TGG_KTTQD.120.146	>10_TGG_KSVMQ.98.146	>11_TGA_KSVAQ.151.146	>12_TGA_RGVAA.158.146	>13_TCT_ATVKA.221.146	>14_TCG_KGTQM.74.146	>15_TCC_RMIKS.106.146	>17_TAT_TRVSA.57.146	>18_TAG_RLTQA.126.146	>19_TAG_RMVSA.79.146	>20_TAC_QRVSA.87.146	>21_TAC_ERVSV.114.146	>22_TAA_RITAA.99.146	>23_GTT_GTRAY.164.146	>24_GTG_HLIQY.56.146	>25_GTA_YTRQV.143.146	>26_GGT_ALKNM.53.146	>27_GGT_LTKDQ.209.146	>28_GGG_RSKER.348.146	>29_GGC_TLKNQ.237.146	>30_GGA_LAKDQ.183.146	>31_GCT_KITKF.92.146	>32_GCC_VRLKY.68.146	>33_GCA_ALRQQ.68.146	>34_GAT_RTMRY.56.146	>35_GAG_VMRWY.73.146	>36_GAC_ATRRF.91.146	>37_GAA_RFQKF.44.146	>38_CTA_LHYAK.91.146	>39_CTA_IFNAK.78.146	>40_CGG_STRER.41.146	>41_CGC_RVMSR.105.146	>42_CGA_TFYAA.36.146	>43_CCT_MTNGK.160.146	>44_CCT_RGDSK.110.146	>45_CCG_RCYEK.177.146	>46_CCC_RLDSK.50.146	>47_CCA_KMTQK.417.146	>48_CCA_EHNAK.286.146	>49_CAT_LSQSR.175.146	>51_CAG_MSHWR.124.146	>52_CAC_LGMRR.155.146
	NNCTTATTAAGANN	NNCTCATTAGGANN	NNTAAATTAATANN	NNGTGGTAATTANN	NNGCTAATTATCNN	NNTAATTAGGGNN	NNTCATTAGTGNN	NNGACGTCTGGTNN	NNGTCCATTAAANN	NNGCGCTAATGANN	NNGCTCATTAAANN	NNGGGGATTAGANN	NNCCCATTACAANN	NNGCGGATTAGCNN	NNGTATTAGCANN	NNCTCATTATGANN	NNCCTGCTAATGNN	NNACATTAATANN	NNCGCATTATGNN	NNCGCTTAATTANN	NNCTACTTAGGTNN	NNGACTTAAGTGNN	NNCTACTTAAGGNN	NNGCCTTAGGGNN	NNCCTCCTTATTNN	NNTCCCCTCAAANN	NNCCACCTTAACNN	NNGCCTTAAGGANN	NNTGACTTAAGCNN	NNCGTCTTATGANN	NNAACTACTTAAGNN	NNCTTCTTAGGGNN	NNCCCTCTTAACANN	NNGCGTCTCAAANN	NNCTTCTTAGCCNN	NNCCTAGTTAGTCNN	NNCTAGTTAAACNN	NNTCCGTTATCANN	NNCGCGTTAGCCNN	NNCTCGTTAGATNN	NNATTAGTTAACNN	NNTCGGGTTAATANN	NNGTCGGTCATANN	NNATTAAAACTGNN	NNACTTTAACCANN	NNAGTGGTTAAANN	NNCGTGTTAGCGNN	NNCCTGTCAACGNN	NNGTGTGCTACGNN
	>1_TTT_RTVAA.90.147	>2_TTT_RTVSA.82.147	>4_TTC_VRVSA.85.147	>5_TTC_TRVAA.130.147	>6_TTA_VRVAA.165.147	>7_TTA_RVLRA.250.147	>8_TGT_RVVSQ.188.147	>9_TGG_KTTQD.120.147	>10_TGG_KSVMQ.96.147	>11_TGA_KSVAQ.150.147	>12_TGA_RGVAA.158.147	>13_TCT_ATVKA.220.147	>14_TCG_KGTQM.73.147	>15_TCC_RMIKS.105.147	>17_TAT_TRVSA.57.147	>18_TAG_RLTQA.126.147	>19_TAG_RMVSA.78.147	>20_TAC_QRVSA.87.147	>21_TAC_ERVSV.113.147	>22_TAA_RITAA.97.147	>23_GTT_GTRAY.163.147	>24_GTG_HLIQY.56.147	>25_GTA_YTRQV.141.147	>26_GGT_ALKNM.53.147	>27_GGT_LTKDQ.206.147	>28_GGG_RSKER.344.147	>29_GGC_TLKNQ.236.147	>30_GGA_LAKDQ.183.147	>31_GCT_KITKF.91.147	>32_GCC_VRLKY.68.147	>33_GCA_ALRQQ.68.147	>34_GAT_RTMRY.55.147	>35_GAG_VMRWY.73.147	>36_GAC_ATRRF.91.147	>37_GAA_RFQKF.44.147	>38_CTA_LHYAK.90.147	>39_CTA_IFNAK.77.147	>40_CGG_STRER.41.147	>41_CGC_RVMSR.103.147	>42_CGA_TFYAA.36.147	>43_CCT_MTNGK.159.147	>44_CCT_RGDSK.109.147	>45_CCG_RCYEK.173.147	>46_CCC_RLDSK.50.147	>47_CCA_KMTQK.415.147	>48_CCA_EHNAK.284.147	>49_CAT_LSQSR.172.147	>51_CAG_MSHWR.123.147	>52_CAC_LGMRR.154.147
	NNCTAATTATATNN	NNTGTGCTAATTNN	NNCTCATTAGAGNN	NNTCATTAAGTNN	NNTTATTAAGANN	NNGCCATAATTANN	NNACAGTTAATGNN	NNCCCATTACCANN	NNGCACTAATGANN	NNTTAATTACGCNN	NNCTAATTACANN	NNCCGGATTATGNN	NNGACGTCTGGTNN	NNAGGATTAACGNN	NNACGTATTAAGNN	NNGCTTGTTAATNN	NNATTCCGCTCTNN	NNCGAATTAGCGNN	NNTCGTATTATGNN	NNCAAATTAATTNN	NNCTACTTAGTCNN	NNAGCCTAAGTGNN	NNTCGTTAAGTANN	NNCACCTTAAAANN	NNTACTTAAGGANN	NNTCCCCTTATANN	NNTCGCCTCAAGNN	NNCTTCCTTTAANN	NNAGCTTAGCGNN	NNGGCTTAAGANN	NNTCCATAAGTANN	NNCGTCTTACACNN	NNACCTCTTAACNN	NNCGTCTTCAANN	NNGGTACTTAAGNN	NNGCTAGTTAACCNN	NNGCTAGTCATGNN	NNCTTTTAATGGNN	NNTCATGTTAAANN	NNCCTCGTTAATANN	NNTCAGGTTAAGNN	NNTGGGTTAACCNN	NNCTGGTTATCANN	NNGCGGGTTAATANN	NNATTCTAACTANN	NNCTGCTAACTANN	NNTGTGTTAACANN	NNCCTGTCAGCNN	NNGTGTGTTGAANN
	>1_TTT_RTVAA.89.148	>2_TTT_RTVSA.82.148	>4_TTC_VRVSA.85.148	>5_TTC_TRVAA.128.148	>6_TTA_VRVAA.165.148	>7_TTA_RVLRA.249.148	>8_TGT_RVVSQ.187.148	>9_TGG_KTTQD.119.148	>10_TGG_KSVMQ.96.148	>11_TGA_KSVAQ.149.148	>12_TGA_RGVAA.157.148	>13_TCT_ATVKA.219.148	>14_TCG_KGTQM.73.148	>15_TCC_RMIKS.104.148	>17_TAT_TRVSA.56.148	>18_TAG_RLTQA.125.148	>19_TAG_RMVSA.76.148	>20_TAC_QRVSA.86.148	>21_TAC_ERVSV.111.148	>22_TAA_RITAA.97.148	>23_GTT_GTRAY.163.148	>24_GTG_HLIQY.56.148	>25_GTA_YTRQV.141.148	>26_GGT_ALKNM.52.148	>27_GGT_LTKDQ.205.148	>28_GGG_RSKER.343.148	>29_GGC_TLKNQ.234.148	>30_GGA_LAKDQ.180.148	>31_GCT_KITKF.90.148	>32_GCC_VRLKY.67.148	>33_GCA_ALRQQ.68.148	>34_GAT_RTMRY.55.148	>35_GAG_VMRWY.73.148	>36_GAC_ATRRF.90.148	>37_GAA_RFQKF.44.148	>38_CTA_LHYAK.90.148	>39_CTA_IFNAK.77.148	>40_CGG_STRER.41.148	>41_CGC_RVMSR.103.148	>42_CGA_TFYAA.33.148	>43_CCT_MTNGK.159.148	>44_CCT_RGDSK.107.148	>45_CCG_RCYEK.170.148	>46_CCC_RLDSK.49.148	>47_CCA_KMTQK.412.148	>48_CCA_EHNAK.276.148	>49_CAT_LSQSR.171.148	>51_CAG_MSHWR.123.148	>52_CAC_LGMRR.153.148
	NNCCTAATTATTNN	NNTAATTAATTNN	NNCGTATTAACGNN	NNTTAATTAGTANN	NNCCTCATTACTNN	NNCTAATTAATCNN	NNTACCCTAATGNN	NNTCCATTATGGNN	NNCTCATTATGGNN	NNATTCATTAATNN	NNGATTTAATTANN	NNCGGATTATCNN	NNTCAATTATGANN	NNGGACTAATCCNN	NNTGTATTAAGANN	NNGCTTGTTAGANN	NNTGCAGGAATTNN	NNCGTATTAATGNN	NNCGTATTATTTNN	NNGTAGCCAATGNN	NNACTACTTAAGNN	NNGTCGTAAGTGNN	NNTTGTTAAGTANN	NNCCGCCTTAAACNN	NNTCCTTAAAGNN	NNCCCCTTAGTTNN	NNCGCCTTAGTTNN	NNGTTCCTTAAGNN	NNCTACTTAAGANN	NNGGGGCTTAACNN	NNGCTACTTATCNN	NNCATACTAAGANN	NNCCTCTTAACNN	NNGCGTCTCACCNN	NNGCTTCTTAACANN	NNACTAGTTAAGNN	NNAGTAGTTAAANN	NNGCCCGTTAGCNN	NNCCCGTTAACANN	NNTCTCGTTAGTNN	NNCAGGTTAAAGNN	NNGCGGGTTACCNN	NNATTGGTTACANN	NNCGGGTTAGANN	NNACTGGTTAATNN	NNAGTGGTTAATNN	NNTGTGCTAACANN	NNCTGTTAACCNN	NNTGTGTTACTGNN
	>1_TTT_RTVAA.88.149	>2_TTT_RTVSA.81.149	>4_TTC_VRVSA.83.149	>5_TTC_TRVAA.128.149	>6_TTA_VRVAA.163.149	>7_TTA_RVLRA.248.149	>8_TGT_RVVSQ.185.149	>9_TGG_KTTQD.118.149	>10_TGG_KSVMQ.96.149	>11_TGA_KSVAQ.147.149	>12_TGA_RGVAA.156.149	>13_TCT_ATVKA.218.149	>14_TCG_KGTQM.71.149	>15_TCC_RMIKS.104.149	>17_TAT_TRVSA.56.149	>18_TAG_RLTQA.123.149	>19_TAG_RMVSA.76.149	>20_TAC_QRVSA.86.149	>21_TAC_ERVSV.110.149	>22_TAA_RITAA.97.149	>23_GTT_GTRAY.163.149	>24_GTG_HLIQY.55.149	>25_GTA_YTRQV.140.149	>26_GGT_ALKNM.52.149	>27_GGT_LTKDQ.203.149	>28_GGG_RSKER.339.149	>29_GGC_TLKNQ.231.149	>30_GGA_LAKDQ.178.149	>31_GCT_KITKF.90.149	>32_GCC_VRLKY.67.149	>33_GCA_ALRQQ.67.149	>34_GAT_RTMRY.54.149	>35_GAG_VMRWY.72.149	>36_GAC_ATRRF.89.149	>37_GAA_RFQKF.43.149	>38_CTA_LHYAK.90.149	>39_CTA_IFNAK.76.149	>40_CGG_STRER.41.149	>41_CGC_RVMSR.102.149	>42_CGA_TFYAA.33.149	>43_CCT_MTNGK.156.149	>44_CCT_RGDSK.107.149	>45_CCG_RCYEK.168.149	>46_CCC_RLDSK.49.149	>47_CCA_KMTQK.402.149	>48_CCA_EHNAK.269.149	>49_CAT_LSQSR.171.149	>51_CAG_MSHWR.122.149	>52_CAC_LGMRR.151.149
	NNCCCCTAATTANN	NNTCTCTTAATGNN	NNTGTATTAAGANN	NNTAATTAAAGNN	NNATGCCTCAAANN	NNATATTAATTANN	NNGGAGTTAATGNN	NNGGCCATTAACNN	NNTGCATTAGGANN	NNTTAATTAATANN	NNCTGTTAATTANN	NNGCCCTAATCCNN	NNCCTATTAGTANN	NNTGGCTAATCCNN	NNCGAATTAGCANN	NNCCAATTACAGNN	NNATCCTTAATGNN	NNCGTATTACGGNN	NNTCGCATTATCNN	NNCTCGTTAGTGNN	NNGCCCTAAGTANN	NNCCACTTATGTNN	NNTAGTTAAGTANN	NNGCGCCTTAATGNN	NNCTTCCTTATANN	NNCCACTTAATANN	NNTCGCCTTTAGNN	NNCTCCTTATTCNN	NNCAGCTTAAGGNN	NNAAGCTAAGCCNN	NNCTACTTAAANN	NNAGAGTTAAGANN	NNCCTCTCAGGANN	NNCGTCTCACGGNN	NNGTGTTAAGAANN	NNGACTCTTGCTNN	NNCCTAGTTACGNN	NNTCCGTTAACCNN	NNCCATGTTAACNN	NNGCTAGTTAAANN	NNGCTGGTTACANN	NNTATCTTCTCCNN	NNCCTGGTTATCNN	NNCGGGTTACAGNN	NNGGACTAACTANN	NNCTAGTTATANN	NNGTCACTAACANN	NNACTGTTAAGANN	NNTGTGTCAATANN
	>1_TTT_RTVAA.87.150	>2_TTT_RTVSA.80.150	>4_TTC_VRVSA.82.150	>5_TTC_TRVAA.127.150	>6_TTA_VRVAA.162.150	>7_TTA_RVLRA.246.150	>8_TGT_RVVSQ.184.150	>9_TGG_KTTQD.118.150	>10_TGG_KSVMQ.95.150	>11_TGA_KSVAQ.146.150	>12_TGA_RGVAA.154.150	>13_TCT_ATVKA.216.150	>14_TCG_KGTQM.68.150	>15_TCC_RMIKS.103.150	>17_TAT_TRVSA.55.150	>18_TAG_RLTQA.122.150	>19_TAG_RMVSA.74.150	>20_TAC_QRVSA.86.150	>21_TAC_ERVSV.109.150	>22_TAA_RITAA.96.150	>23_GTT_GTRAY.162.150	>24_GTG_HLIQY.55.150	>25_GTA_YTRQV.138.150	>26_GGT_ALKNM.50.150	>27_GGT_LTKDQ.203.150	>28_GGG_RSKER.339.150	>29_GGC_TLKNQ.228.150	>30_GGA_LAKDQ.176.150	>31_GCT_KITKF.88.150	>32_GCC_VRLKY.67.150	>33_GCA_ALRQQ.67.150	>34_GAT_RTMRY.54.150	>35_GAG_VMRWY.72.150	>36_GAC_ATRRF.89.150	>37_GAA_RFQKF.43.150	>38_CTA_LHYAK.88.150	>39_CTA_IFNAK.75.150	>40_CGG_STRER.40.150	>41_CGC_RVMSR.101.150	>42_CGA_TFYAA.33.150	>43_CCT_MTNGK.155.150	>44_CCT_RGDSK.106.150	>45_CCG_RCYEK.166.150	>46_CCC_RLDSK.49.150	>47_CCA_KMTQK.401.150	>48_CCA_EHNAK.269.150	>49_CAT_LSQSR.170.150	>51_CAG_MSHWR.121.150	>52_CAC_LGMRR.151.150
	NNGCTCATTAACNN	NNGCTAATTAAGNN	NNGCATTAACGNN	NNCACTAATTANN	NNTCATTAATGNN	NNTTCATTAAGGNN	NNGCACATTAGTNN	NNGTCCATTAGTANN	NNGACTTAATGANN	NNGACTTAATGANN	NNGTTAATTAGTNN	NNTCTTTAATCCNN	NNTCAATTAGGGNN	NNGCGGATTAGTGNN	NNGCCACTAATGNN	NNTCAATTATGTNN	NNGCACATTAACNN	NNCGCATTAGGGNN	NNCACATTAACANN	NNACTAATTATCNN	NNCGCTAAGTANN	NNGACACTTAAGNN	NNGCATTAAGTANN	NNGTTCACCAGTNN	NNCTCCTTTAACNN	NNCCCCCTTAGTANN	NNTCGCCTCTACNN	NNTCTCCTTATCNN	NNGGCTTAAGCCNN	NNCGTCTTAAGCCNN	NNGTTTTAAGTANN	NNCGTCTTAGGNN	NNCCCTCTTAGANN	NNGCGTCTTAAANN	NNTGCTTAAGAANN	NNCCTAGTTAATTNN	NNACTAGTTAGTGNN	NNCCCGTTAACNN	NNTGGCTTAACANN	NNACTCGTTTGTNN	NNTGGGTTAACCNN	NNGATGGTTAACNN	NNTCAGTTAATGNN	NNCGGGTTATACNN	NNTCGTTAACCANN	NNAACTAGTTAGNN	NNCGTGTTAACTNN	NNCGCCTGTTAGCNN	NNTGTGTCAACANN
	>1_TTT_RTVAA.87.151	>2_TTT_RTVSA.80.151	>4_TTC_VRVSA.82.151	>5_TTC_TRVAA.127.151	>6_TTA_VRVAA.162.151	>7_TTA_RVLRA.243.151	>8_TGT_RVVSQ.183.151	>9_TGG_KTTQD.118.151	>10_TGG_KSVMQ.95.151	>11_TGA_KSVAQ.146.151	>12_TGA_RGVAA.153.151	>13_TCT_ATVKA.210.151	>14_TCG_KGTQM.67.151	>15_TCC_RMIKS.102.151	>17_TAT_TRVSA.55.151	>18_TAG_RLTQA.122.151	>19_TAG_RMVSA.73.151	>20_TAC_QRVSA.85.151	>21_TAC_ERVSV.106.151	>22_TAA_RITAA.94.151	>23_GTT_GTRAY.158.151	>24_GTG_HLIQY.54.151	>25_GTA_YTRQV.136.151	>26_GGT_ALKNM.50.151	>27_GGT_LTKDQ.200.151	>28_GGG_RSKER.338.151	>29_GGC_TLKNQ.227.151	>30_GGA_LAKDQ.175.151	>31_GCT_KITKF.88.151	>32_GCC_VRLKY.67.151	>33_GCA_ALRQQ.66.151	>34_GAT_RTMRY.51.151	>35_GAG_VMRWY.71.151	>36_GAC_ATRRF.88.151	>37_GAA_RFQKF.43.151	>38_CTA_LHYAK.88.151	>39_CTA_IFNAK.75.151	>40_CGG_STRER.40.151	>41_CGC_RVMSR.101.151	>42_CGA_TFYAA.32.151	>43_CCT_MTNGK.155.151	>44_CCT_RGDSK.105.151	>45_CCG_RCYEK.164.151	>46_CCC_RLDSK.48.151	>47_CCA_KMTQK.395.151	>48_CCA_EHNAK.267.151	>49_CAT_LSQSR.167.151	>51_CAG_MSHWR.119.151	>52_CAC_LGMRR.150.151
	NNTCTCATTAAANN	NNCTCCTTAATTNN	NNGTATTATCANN	NNTGTCTAATTANN	NNCCTCATTAACNN	NNACAGTAATTANN	NNCGTCCTAATGNN	NNCCCCATTATCNN	NNCGCATTAGGANN	NNCCTCATTAGCNN	NNATTCATTAAGNN	NNGGATTAGAANN	NNCTAATTAAGGNN	NNGGGGATTATGNN	NNGCGCATGAGANN	NNACCAATTACANN	NNTCGCATTAGTNN	NNCACATTAAGGNN	NNCGTATTATCCNN	NNGCTAATTAGANN	NNTTTGTAAGTANN	NNCGTTTAAGTGNN	NNCGGTTAAGTANN	NNACACCTTAACNN	NNTTCCTTATAGNN	NNGCCCCTCAAGNN	NNGCACCTTAGTNN	NNTTCCTTATAANN	NNAGTCTTAAGANN	NNTGGCAAAGCCNN	NNCCTACTTATANN	NNATTCATAAGANN	NNCCTCTCTACANN	NNCGTCTCATAANN	NNGGTTCTTAGGNN	NNACTAGTTATTNN	NNCCTCGTTAGGNN	NNCATCGCTATGNN	NNGCACGTTAACNN	NNCTCGTTAGTTNN	NNCCGTGTTAGTNN	NNCGGGTTAGATNN	NNACCGGTTAATNN	NNCCGGGTTAATANN	NNTTATTAACTANN	NNCTAGTTAGTNN	NNATTATTAACANN	NNGCCTGTTAAGCNN	NNTGTGTTAGTTNN
	>1_TTT_RTVAA.86.152	>2_TTT_RTVSA.79.152	>4_TTC_VRVSA.82.152	>5_TTC_TRVAA.126.152	>6_TTA_VRVAA.162.152	>7_TTA_RVLRA.243.152	>8_TGT_RVVSQ.179.152	>9_TGG_KTTQD.116.152	>10_TGG_KSVMQ.94.152	>11_TGA_KSVAQ.145.152	>12_TGA_RGVAA.152.152	>13_TCT_ATVKA.209.152	>14_TCG_KGTQM.67.152	>15_TCC_RMIKS.100.152	>17_TAT_TRVSA.55.152	>18_TAG_RLTQA.122.152	>19_TAG_RMVSA.72.152	>20_TAC_QRVSA.83.152	>21_TAC_ERVSV.104.152	>22_TAA_RITAA.94.152	>23_GTT_GTRAY.158.152	>24_GTG_HLIQY.53.152	>25_GTA_YTRQV.135.152	>26_GGT_ALKNM.50.152	>27_GGT_LTKDQ.197.152	>28_GGG_RSKER.332.152	>29_GGC_TLKNQ.227.152	>30_GGA_LAKDQ.173.152	>31_GCT_KITKF.88.152	>32_GCC_VRLKY.66.152	>33_GCA_ALRQQ.65.152	>34_GAT_RTMRY.51.152	>35_GAG_VMRWY.71.152	>36_GAC_ATRRF.88.152	>37_GAA_RFQKF.43.152	>38_CTA_LHYAK.87.152	>39_CTA_IFNAK.72.152	>40_CGG_STRER.40.152	>41_CGC_RVMSR.100.152	>42_CGA_TFYAA.32.152	>43_CCT_MTNGK.153.152	>44_CCT_RGDSK.102.152	>45_CCG_RCYEK.164.152	>46_CCC_RLDSK.47.152	>47_CCA_KMTQK.392.152	>48_CCA_EHNAK.265.152	>49_CAT_LSQSR.165.152	>51_CAG_MSHWR.119.152	>52_CAC_LGMRR.148.152
	NNCCTAATTAATNN	NNTACATAATGANN	NNGCGCATTAAGNN	NNGCATTAATTANN	NNCTTATTAGTCNN	NNGAACTAATTANN	NNTTCATTAATANN	NNTCCATTAATANN	NNCCTCATTAATNN	NNGTACTAATGANN	NNTAATTAATGNN	NNGCGGATTAACNN	NNGCCCATTAGTANN	NNCCGGATTATCNN	NNAGCGCTAATGNN	NNGCCAATTAATANN	NNCCTAATTATANN	NNGTATTAACANN	NNGCGTATAACCNN	NNGCTTTAATTANN	NNATCCCAAGTANN	NNCCCACTTAATANN	NNGCTACTTACANN	NNGCGCCTTAGAGNN	NNGTTCCTTAAGNN	NNCTTTTAAGGGNN	NNTCGCCTTAAACNN	NNCTTCCTTTAGNN	NNGGCTTATAANN	NNGTTCTAAGACNN	NNCTACTTAGGGNN	NNATACTTAAGANN	NNCCCTCTTATCNN	NNCGTCTCAAGCNN	NNGTCCAGATGGNN	NNGCTGGTTATANN	NNCTCGTTAAGANN	NNACCGTTAAGGNN	NNCACGTTAGTANN	NNGCTCGTTAGGANN	NNTCGGGTTAAANN	NNCGGGTTAAGNN	NNCTGGTTAACTNN	NNTCAGGTTAAANN	NNGCCCTAACCANN	NNGCTGGTTAGTNN	NNGCGTGTTATANN	NNCTGTTACTCNN	NNGCGTGTCAGCNN
	>1_TTT_RTVAA.86.153	>2_TTT_RTVSA.78.153	>4_TTC_VRVSA.80.153	>5_TTC_TRVAA.126.153	>6_TTA_VRVAA.160.153	>7_TTA_RVLRA.241.153	>8_TGT_RVVSQ.178.153	>9_TGG_KTTQD.115.153	>10_TGG_KSVMQ.91.153	>11_TGA_KSVAQ.145.153	>12_TGA_RGVAA.150.153	>13_TCT_ATVKA.208.153	>14_TCG_KGTQM.67.153	>15_TCC_RMIKS.98.153	>17_TAT_TRVSA.55.153	>18_TAG_RLTQA.120.153	>19_TAG_RMVSA.72.153	>20_TAC_QRVSA.83.153	>21_TAC_ERVSV.104.153	>22_TAA_RITAA.94.153	>23_GTT_GTRAY.158.153	>24_GTG_HLIQY.52.153	>25_GTA_YTRQV.135.153	>26_GGT_ALKNM.50.153	>27_GGT_LTKDQ.196.153	>28_GGG_RSKER.330.153	>29_GGC_TLKNQ.226.153	>30_GGA_LAKDQ.173.153	>31_GCT_KITKF.86.153	>32_GCC_VRLKY.66.153	>33_GCA_ALRQQ.64.153	>34_GAT_RTMRY.50.153	>35_GAG_VMRWY.71.153	>36_GAC_ATRRF.88.153	>37_GAA_RFQKF.43.153	>38_CTA_LHYAK.85.153	>39_CTA_IFNAK.71.153	>40_CGG_STRER.39.153	>41_CGC_RVMSR.100.153	>42_CGA_TFYAA.31.153	>43_CCT_MTNGK.153.153	>44_CCT_RGDSK.101.153	>45_CCG_RCYEK.161.153	>46_CCC_RLDSK.46.153	>47_CCA_KMTQK.391.153	>48_CCA_EHNAK.261.153	>49_CAT_LSQSR.161.153	>51_CAG_MSHWR.119.153	>52_CAC_LGMRR.148.153
	NNTGCCTAATTANN	NNTGAGTTAATANN	NNGTGTTAATTANN	NNCAACTAATTANN	NNGCTAATTACANN	NNCTTCTAATTANN	NNTGAATTAATGNN	NNCCCATTTAGANN	NNTGCATTAGCGNN	NNTTAATTAGCGNN	NNGCCCATTATANN	NNCGGATTTGTGNN	NNCCATTATTANN	NNGGTCTAATCCNN	NNGCTAATTAACNN	NNCTAATTAAGTNN	NNCTCCTTAATANN	NNGCGCATTAAGNN	NNTTATTAATTANN	NNCTAATTATGNN	NNACTGTAAGTANN	NNGCTCTAAGTGNN	NNAGGCTAAGTANN	NNCTAATTAGCANN	NNTCCTTAATANN	NNCTCACTTAACNN	NNCCGCCTTAAGTNN	NNCTCCTTACGANN	NNCGGCTTAAACNN	NNTGTCTTAATANN	NNCACTCAAGTANN	NNTGACTTAAGANN	NNCCTCTTCATCNN	NNCGTCTCCAAANN	NNGGTACTTATANN	NNACTAGTTAGCANN	NNTCTCGTTAAGNN	NNCTCCGTTATGNN	NNTGAGTTAACANN	NNCCTTGTTAACNN	NNCTAGTTAACCNN	NNACGGGTTAGANN	NNTTGGTTAAGANN	NNGCCGGTTATCNN	NNGCTGGTTATTNN	NNGCGCTAACCANN	NNTCAGTTAACANN	NNCTGTCAGGGNN	NNGTGTGCTACANN
	>1_TTT_RTVAA.85.154	>2_TTT_RTVSA.78.154	>4_TTC_VRVSA.79.154	>5_TTC_TRVAA.126.154	>6_TTA_VRVAA.155.154	>7_TTA_RVLRA.240.154	>8_TGT_RVVSQ.178.154	>9_TGG_KTTQD.114.154	>10_TGG_KSVMQ.89.154	>11_TGA_KSVAQ.145.154	>12_TGA_RGVAA.145.154	>13_TCT_ATVKA.207.154	>14_TCG_KGTQM.66.154	>15_TCC_RMIKS.97.154	>17_TAT_TRVSA.55.154	>18_TAG_RLTQA.120.154	>19_TAG_RMVSA.72.154	>20_TAC_QRVSA.83.154	>21_TAC_ERVSV.104.154	>22_TAA_RITAA.93.154	>23_GTT_GTRAY.157.154	>24_GTG_HLIQY.52.154	>25_GTA_YTRQV.134.154	>26_GGT_ALKNM.49.154	>27_GGT_LTKDQ.196.154	>28_GGG_RSKER.330.154	>29_GGC_TLKNQ.222.154	>30_GGA_LAKDQ.172.154	>31_GCT_KITKF.86.154	>32_GCC_VRLKY.65.154	>33_GCA_ALRQQ.64.154	>34_GAT_RTMRY.50.154	>35_GAG_VMRWY.71.154	>36_GAC_ATRRF.88.154	>37_GAA_RFQKF.42.154	>38_CTA_LHYAK.84.154	>39_CTA_IFNAK.70.154	>40_CGG_STRER.39.154	>41_CGC_RVMSR.99.154	>42_CGA_TFYAA.31.154	>43_CCT_MTNGK.153.154	>44_CCT_RGDSK.100.154	>45_CCG_RCYEK.160.154	>46_CCC_RLDSK.46.154	>47_CCA_KMTQK.386.154	>48_CCA_EHNAK.258.154	>49_CAT_LSQSR.160.154	>51_CAG_MSHWR.118.154	>52_CAC_LGMRR.147.154
	NNGTTAATTATGNN	NNCTAATTAGAGNN	NNACGTATTATANN	NNCCTAATTAAANN	NNCTTATTAATTNN	NNGTGGTAATTANN	NNGCTCATAATGNN	NNATCCATTATGNN	NNCTAATTAGTANN	NNATTAATTAGTNN	NNGCCCGTAGGCNN	NNCGGATTAAANN	NNGCCAATTAACNN	NNTGTCTAATCCNN	NNCTTGTTAATANN	NNTCCAATTATCNN	NNCTTATTAAGANN	NNCGTATTTAGGNN	NNGCGTATTAGTGNN	NNCTAATTAGTGNN	NNTTCGTAAGTANN	NNTCGTTAAGTGNN	NNCTACTTGAAANN	NNTCGCCTCAAANN	NNTTCCTTATTANN	NNGTGTTAAGGGNN	NNCGCCTTCAGANN	NNTTCCTTAATNN	NNCGACTTAAGCCNN	NNCGTCTTAACANN	NNTTGTTAAGTANN	NNTTTGTTAAGANN	NNCCTCTCAAGNN	NNCGTCTTATTCNN	NNGGTTCTTAAGANN	NNCTAGTTATACNN	NNGCTCGTTAACCNN	NNGCCCGTCAAGNN	NNAAACTTAACANN	NNCCTCGTTAAGGNN	NNCTGGTTAATTNN	NNCGGGTTAGGTNN	NNTTTACATTATNN	NNCGGGTTATATNN	NNAATGGTTAAGNN	NNGGTGGTTATGNN	NNTCATGTTAATNN	NNTCCTGTTAGGNN	NNCCGTGTAAAANN
	>1_TTT_RTVAA.85.155	>2_TTT_RTVSA.76.155	>4_TTC_VRVSA.79.155	>5_TTC_TRVAA.126.155	>6_TTA_VRVAA.154.155	>7_TTA_RVLRA.239.155	>8_TGT_RVVSQ.178.155	>9_TGG_KTTQD.111.155	>10_TGG_KSVMQ.89.155	>11_TGA_KSVAQ.144.155	>12_TGA_RGVAA.144.155	>13_TCT_ATVKA.206.155	>14_TCG_KGTQM.66.155	>15_TCC_RMIKS.97.155	>17_TAT_TRVSA.54.155	>18_TAG_RLTQA.120.155	>19_TAG_RMVSA.72.155	>20_TAC_QRVSA.82.155	>21_TAC_ERVSV.103.155	>22_TAA_RITAA.92.155	>23_GTT_GTRAY.157.155	>24_GTG_HLIQY.52.155	>25_GTA_YTRQV.133.155	>26_GGT_ALKNM.49.155	>27_GGT_LTKDQ.192.155	>28_GGG_RSKER.328.155	>29_GGC_TLKNQ.222.155	>30_GGA_LAKDQ.171.155	>31_GCT_KITKF.86.155	>32_GCC_VRLKY.65.155	>33_GCA_ALRQQ.63.155	>34_GAT_RTMRY.50.155	>35_GAG_VMRWY.70.155	>36_GAC_ATRRF.88.155	>37_GAA_RFQKF.42.155	>38_CTA_LHYAK.84.155	>39_CTA_IFNAK.68.155	>40_CGG_STRER.39.155	>41_CGC_RVMSR.99.155	>42_CGA_TFYAA.31.155	>43_CCT_MTNGK.151.155	>44_CCT_RGDSK.98.155	>45_CCG_RCYEK.156.155	>46_CCC_RLDSK.46.155	>47_CCA_KMTQK.386.155	>48_CCA_EHNAK.257.155	>49_CAT_LSQSR.158.155	>51_CAG_MSHWR.117.155	>52_CAC_LGMRR.145.155
	NNAAATTAGCANN	NNCGCATTAAGTNN	NNCAAATTAATGNN	NNGCCCTAATTANN	NNCCTAATTACTNN	NNGTCTAATTANN	NNCGCCCTAATGNN	NNGCCCATTAGGNN	NNGTGCATTAAGNN	NNTAATTAGTANN	NNTAATTACGANN	NNGCGGATTAGTGNN	NNTCAATTAGGANN	NNAGGGATTAAANN	NNCGTATTATACNN	NNGTCAATTAGTNN	NNCGTATTAGAANN	NNCTCGTTAATANN	NNCGTGTTAGTNN	NNGCGTTAATTANN	NNTACTTAGCGNN	NNCCACTTACGANN	NNTCCTGACAGTNN	NNACGCCTTAACANN	NNTCCTTAAACNN	NNCCCCTTAGCNN	NNGCGCCTTAGCGNN	NNGCTCCTTAAANN	NNCGTCTTATCANN	NNGTTTTAAGAANN	NNCTACTTAAGTNN	NNCGTCTTATATNN	NNGCCTCTCAGANN	NNCGTCTTGGGNN	NNGGTTCTTTAANN	NNCTAGTTACGNN	NNGGTAGTTATTNN	NNGACCGTTAATNN	NNAGGCTTAACANN	NNACTCGTTTCANN	NNGGGTTAGTGNN	NNAATGGTTAACNN	NNACCAGTTAAANN	NNTCTCTCGCCTNN	NNAAGTTAACTANN	NNCTAGTTAATNN	NNCGTGTTAAAGNN	NNCTGTTAATGNN	NNATGTGTTAGGNN
	>1_TTT_RTVAA.84.156	>2_TTT_RTVSA.76.156	>4_TTC_VRVSA.78.156	>5_TTC_TRVAA.125.156	>6_TTA_VRVAA.153.156	>7_TTA_RVLRA.238.156	>8_TGT_RVVSQ.178.156	>9_TGG_KTTQD.110.156	>10_TGG_KSVMQ.87.156	>11_TGA_KSVAQ.144.156	>12_TGA_RGVAA.144.156	>13_TCT_ATVKA.205.156	>14_TCG_KGTQM.65.156	>15_TCC_RMIKS.95.156	>17_TAT_TRVSA.54.156	>18_TAG_RLTQA.117.156	>19_TAG_RMVSA.71.156	>20_TAC_QRVSA.82.156	>21_TAC_ERVSV.102.156	>22_TAA_RITAA.92.156	>23_GTT_GTRAY.156.156	>24_GTG_HLIQY.52.156	>25_GTA_YTRQV.133.156	>26_GGT_ALKNM.49.156	>27_GGT_LTKDQ.192.156	>28_GGG_RSKER.328.156	>29_GGC_TLKNQ.221.156	>30_GGA_LAKDQ.168.156	>31_GCT_KITKF.85.156	>32_GCC_VRLKY.65.156	>33_GCA_ALRQQ.63.156	>34_GAT_RTMRY.49.156	>35_GAG_VMRWY.70.156	>36_GAC_ATRRF.87.156	>37_GAA_RFQKF.42.156	>38_CTA_LHYAK.83.156	>39_CTA_IFNAK.67.156	>40_CGG_STRER.38.156	>41_CGC_RVMSR.98.156	>42_CGA_TFYAA.30.156	>43_CCT_MTNGK.150.156	>44_CCT_RGDSK.98.156	>45_CCG_RCYEK.156.156	>46_CCC_RLDSK.45.156	>47_CCA_KMTQK.385.156	>48_CCA_EHNAK.253.156	>49_CAT_LSQSR.157.156	>51_CAG_MSHWR.117.156	>52_CAC_LGMRR.145.156
	NNCCAATTAATTNN	NNAGTCTTAATANN	NNCTAATTACGANN	NNCTAATTAGGTNN	NNTAGTTAATTANN	NNAGCTAATTANN	NNTTCGCTAATGNN	NNCCCATTAAACNN	NNCACATTATGGNN	NNCCTCATTAGTGNN	NNCTAATTAGTGNN	NNTGCGTAATCCNN	NNCTCATTAGCGNN	NNTGGATTAGTGNN	NNGTCCAGATGGNN	NNCAATTAACTNN	NNGCTAATTAAGNN	NNTGAGTTAATANN	NNGCGTATTTATNN	NNCTCATTAGGANN	NNGCCATAAGTANN	NNCACTTAATCNN	NNCTACTTAGACNN	NNGCTAATTAAANN	NNGCTCCTTATGNN	NNTGCTTAAGGGNN	NNTCGCCTTAAGCNN	NNGTTCCTTAGTNN	NNCGGCTTATTCNN	NNCGGCTTAAGCCNN	NNATCGTAAGTANN	NNCGTCTCAATGNN	NNCCTCTCCAGNN	NNCGTCTCAAGTNN	NNGGTTCTTAACANN	NNTTAGTTAACANN	NNACTAGTTAGTANN	NNTCCGTAACGGNN	NNGTACTTAACANN	NNCTTGTTAATGNN	NNGGTGGTTAAANN	NNTTGCCAGTTTNN	NNCCTGGTTAGTNN	NNCCCGTTCGTGNN	NNCTAGTTAGGANN	NNCTAGTTAAAGNN	NNTCGCTAGACANN	NNCTGTCTAAANN	NNGCGTGTCATGNN
	>1_TTT_RTVAA.84.157	>2_TTT_RTVSA.76.157	>4_TTC_VRVSA.77.157	>5_TTC_TRVAA.125.157	>6_TTA_VRVAA.151.157	>7_TTA_RVLRA.237.157	>8_TGT_RVVSQ.176.157	>9_TGG_KTTQD.109.157	>10_TGG_KSVMQ.86.157	>11_TGA_KSVAQ.142.157	>12_TGA_RGVAA.143.157	>13_TCT_ATVKA.204.157	>14_TCG_KGTQM.64.157	>15_TCC_RMIKS.91.157	>17_TAT_TRVSA.54.157	>18_TAG_RLTQA.117.157	>19_TAG_RMVSA.71.157	>20_TAC_QRVSA.81.157	>21_TAC_ERVSV.102.157	>22_TAA_RITAA.92.157	>23_GTT_GTRAY.156.157	>24_GTG_HLIQY.51.157	>25_GTA_YTRQV.132.157	>26_GGT_ALKNM.48.157	>27_GGT_LTKDQ.190.157	>28_GGG_RSKER.325.157	>29_GGC_TLKNQ.219.157	>30_GGA_LAKDQ.163.157	>31_GCT_KITKF.85.157	>32_GCC_VRLKY.63.157	>33_GCA_ALRQQ.62.157	>34_GAT_RTMRY.49.157	>35_GAG_VMRWY.69.157	>36_GAC_ATRRF.86.157	>37_GAA_RFQKF.41.157	>38_CTA_LHYAK.82.157	>39_CTA_IFNAK.66.157	>40_CGG_STRER.38.157	>41_CGC_RVMSR.97.157	>42_CGA_TFYAA.30.157	>43_CCT_MTNGK.149.157	>44_CCT_RGDSK.97.157	>45_CCG_RCYEK.155.157	>46_CCC_RLDSK.45.157	>47_CCA_KMTQK.384.157	>48_CCA_EHNAK.252.157	>49_CAT_LSQSR.153.157	>51_CAG_MSHWR.116.157	>52_CAC_LGMRR.145.157
	NNTGCAGGAATTNN	NNCACCTTAATANN	NNCGTATTACTTNN	NNTAATTATTGNN	NNTTATTAATTANN	NNGTTAATTAGTNN	NNCCCGATAATGNN	NNTCCCATTAATANN	NNCTCATTAACCNN	NNTTCATTAGTCNN	NNCTCATTATAANN	NNCGGATTAACGNN	NNCTCATTAAAGNN	NNCGGATTATCCNN	NNGCATTAACGNN	NNCTCATTATTANN	NNACATTAACANN	NNCGCATTAACCNN	NNGCGCATTAGCGNN	NNACTAATTAATNN	NNTGCTCAAGTANN	NNGCCACTTAAGNN	NNTGTTTAAGTANN	NNGCACCTTAAAANN	NNTTTCTAAGGANN	NNTATTTAAGGGNN	NNCACCTTAAGNN	NNCATCTAAGGANN	NNATTCTTAAGCNN	NNAGTCTAAGCCNN	NNAAGCTAAGTANN	NNTGTCTTAGAGNN	NNACCTCTCCAANN	NNCGTCTTGCACNN	NNGACTTAAGCCNN	NNCCTAGTTATGTNN	NNACTCGTTACGNN	NNCTCCGTTAATNN	NNCCATGTTACANN	NNCTAGTTAGCANN	NNCAGGTTAAGTNN	NNGGTGGTTAAGNN	NNTTGGTTAAGCNN	NNCGGGTTATGNN	NNGCCTTAACTANN	NNGGTAAAGCATNN	NNGCATGTTACANN	NNCCTGTTATCGNN	NNGTGTGTTCAANN
	>1_TTT_RTVAA.84.158	>2_TTT_RTVSA.75.158	>4_TTC_VRVSA.77.158	>5_TTC_TRVAA.124.158	>6_TTA_VRVAA.151.158	>7_TTA_RVLRA.236.158	>8_TGT_RVVSQ.176.158	>9_TGG_KTTQD.109.158	>10_TGG_KSVMQ.85.158	>11_TGA_KSVAQ.140.158	>12_TGA_RGVAA.138.158	>13_TCT_ATVKA.204.158	>14_TCG_KGTQM.62.158	>15_TCC_RMIKS.90.158	>17_TAT_TRVSA.53.158	>18_TAG_RLTQA.117.158	>19_TAG_RMVSA.71.158	>20_TAC_QRVSA.81.158	>21_TAC_ERVSV.101.158	>22_TAA_RITAA.91.158	>23_GTT_GTRAY.151.158	>24_GTG_HLIQY.51.158	>25_GTA_YTRQV.128.158	>26_GGT_ALKNM.48.158	>27_GGT_LTKDQ.190.158	>28_GGG_RSKER.325.158	>29_GGC_TLKNQ.218.158	>30_GGA_LAKDQ.162.158	>31_GCT_KITKF.84.158	>32_GCC_VRLKY.63.158	>33_GCA_ALRQQ.62.158	>34_GAT_RTMRY.47.158	>35_GAG_VMRWY.69.158	>36_GAC_ATRRF.86.158	>37_GAA_RFQKF.40.158	>38_CTA_LHYAK.77.158	>39_CTA_IFNAK.64.158	>40_CGG_STRER.38.158	>41_CGC_RVMSR.93.158	>42_CGA_TFYAA.30.158	>43_CCT_MTNGK.149.158	>44_CCT_RGDSK.96.158	>45_CCG_RCYEK.154.158	>46_CCC_RLDSK.44.158	>47_CCA_KMTQK.379.158	>48_CCA_EHNAK.252.158	>49_CAT_LSQSR.151.158	>51_CAG_MSHWR.116.158	>52_CAC_LGMRR.143.158
	NNTCGCTAATTANN	NNCGCATTAGGGNN	NNCGCATTAAGNN	NNGCATAATTANN	NNACTAATTACANN	NNTTAATTAATANN	NNGGCATTAATGNN	NNCCATTATGANN	NNGTAATTAGTANN	NNCTCATTAGANN	NNTCTCATTAAANN	NNCGGATTATGTNN	NNCCCCATTAATGNN	NNCGCTTAATCCNN	NNCGTATTAATGNN	NNCCAATTATGNN	NNCGTATTAGGANN	NNCGTATTATANN	NNCGTGTTAACTNN	NNCTAATTATAGNN	NNATCCTAAGTANN	NNCCCACTTAGGANN	NNCATACTTAAANN	NNGTCCAGATTANN	NNCCTCCTTAATTNN	NNTGCCTAAGGGNN	NNCGCCTTACGTNN	NNTTCCTTATTGNN	NNGGGGCTTAAANN	NNTGTCTTAGTGNN	NNGCTACTTAATNN	NNCTACTTAGAANN	NNCCCTCTCAAANN	NNCGTCTTCAGANN	NNGGTTCTTCCANN	NNCTAGTTATGANN	NNTCGTTAACCNN	NNCCCGTTAAAANN	NNCGCCTTAACANN	NNGCTCGTTAACTNN	NNTCGGTTAACCNN	NNGCACGTTAACNN	NNGCCGGTTATGNN	NNGCGGGTTAAGNN	NNGCTTTAACCANN	NNTATGGTTAAANN	NNCGCGTTAACANN	NNCCTGTTTGCANN	NNTTGTGTAAAANN
	>1_TTT_RTVAA.83.159	>2_TTT_RTVSA.75.159	>4_TTC_VRVSA.76.159	>5_TTC_TRVAA.123.159	>6_TTA_VRVAA.150.159	>7_TTA_RVLRA.234.159	>8_TGT_RVVSQ.175.159	>9_TGG_KTTQD.104.159	>10_TGG_KSVMQ.83.159	>11_TGA_KSVAQ.140.159	>12_TGA_RGVAA.136.159	>13_TCT_ATVKA.199.159	>14_TCG_KGTQM.62.159	>15_TCC_RMIKS.89.159	>17_TAT_TRVSA.53.159	>18_TAG_RLTQA.116.159	>19_TAG_RMVSA.71.159	>20_TAC_QRVSA.81.159	>21_TAC_ERVSV.101.159	>22_TAA_RITAA.91.159	>23_GTT_GTRAY.150.159	>24_GTG_HLIQY.51.159	>25_GTA_YTRQV.127.159	>26_GGT_ALKNM.48.159	>27_GGT_LTKDQ.189.159	>28_GGG_RSKER.323.159	>29_GGC_TLKNQ.215.159	>30_GGA_LAKDQ.162.159	>31_GCT_KITKF.84.159	>32_GCC_VRLKY.62.159	>33_GCA_ALRQQ.61.159	>34_GAT_RTMRY.47.159	>35_GAG_VMRWY.68.159	>36_GAC_ATRRF.85.159	>37_GAA_RFQKF.40.159	>38_CTA_LHYAK.77.159	>39_CTA_IFNAK.63.159	>40_CGG_STRER.38.159	>41_CGC_RVMSR.93.159	>42_CGA_TFYAA.30.159	>43_CCT_MTNGK.148.159	>44_CCT_RGDSK.93.159	>45_CCG_RCYEK.152.159	>46_CCC_RLDSK.44.159	>47_CCA_KMTQK.378.159	>48_CCA_EHNAK.250.159	>49_CAT_LSQSR.150.159	>51_CAG_MSHWR.115.159	>52_CAC_LGMRR.143.159
	NNTCATTAATGNN	NNATCATTAATANN	NNCACATTAGCANN	NNGTAATTAGGGNN	NNCCTAATTAATGNN	NNTTTTTAATTANN	NNCACATTAACCNN	NNCCATTAGTGNN	NNCTAATTAACANN	NNTCATTATGGNN	NNTGGCTAATTANN	NNGGGATAATCCNN	NNGCCCATTAATGNN	NNCGGATTAGTNN	NNGACGTTAATGNN	NNACTGCAAAAGNN	NNGTCACTAATGNN	NNCATATTAGGANN	NNACGCATTAATNN	NNCTTATTAATTNN	NNTCCTCAAGTANN	NNCCGCTAAGTGNN	NNCTACTTAGTCNN	NNCCGCCTTAAGGNN	NNCCTCCTTAACGNN	NNCCCCCTTAATGNN	NNTCGCCTTATTNN	NNTTCCTTATANN	NNGATCTTAAGCNN	NNCGTCTTAACCNN	NNCTACTTATCNN	NNCTACTTAAGGNN	NNTCCTCTCCAANN	NNCGTCTCACTANN	NNAGTTCTTATANN	NNCTAGTTATTANN	NNCCTCGTTAGTGNN	NNCCCCGTTAGTNN	NNTGCGTTAACANN	NNCCTAGTTAAANN	NNGAAGGTTAATNN	NNTCAGGTTAGTNN	NNCCGGTTAAATNN	NNTGCTCATCGANN	NNGCATTAACTANN	NNACTGGTTATCNN	NNTCTGCTAACANN	NNACCTGTTAACNN	NNCGTGCTAATGNN
	>1_TTT_RTVAA.83.160	>2_TTT_RTVSA.74.160	>4_TTC_VRVSA.75.160	>5_TTC_TRVAA.123.160	>6_TTA_VRVAA.149.160	>7_TTA_RVLRA.234.160	>8_TGT_RVVSQ.175.160	>9_TGG_KTTQD.103.160	>10_TGG_KSVMQ.83.160	>11_TGA_KSVAQ.138.160	>12_TGA_RGVAA.136.160	>13_TCT_ATVKA.199.160	>14_TCG_KGTQM.61.160	>15_TCC_RMIKS.89.160	>17_TAT_TRVSA.53.160	>18_TAG_RLTQA.113.160	>19_TAG_RMVSA.71.160	>20_TAC_QRVSA.79.160	>21_TAC_ERVSV.101.160	>22_TAA_RITAA.89.160	>23_GTT_GTRAY.149.160	>24_GTG_HLIQY.51.160	>25_GTA_YTRQV.127.160	>26_GGT_ALKNM.48.160	>27_GGT_LTKDQ.188.160	>28_GGG_RSKER.323.160	>29_GGC_TLKNQ.215.160	>30_GGA_LAKDQ.162.160	>31_GCT_KITKF.84.160	>32_GCC_VRLKY.62.160	>33_GCA_ALRQQ.61.160	>34_GAT_RTMRY.46.160	>35_GAG_VMRWY.68.160	>36_GAC_ATRRF.84.160	>37_GAA_RFQKF.39.160	>38_CTA_LHYAK.76.160	>39_CTA_IFNAK.63.160	>40_CGG_STRER.37.160	>41_CGC_RVMSR.92.160	>42_CGA_TFYAA.30.160	>43_CCT_MTNGK.145.160	>44_CCT_RGDSK.93.160	>45_CCG_RCYEK.151.160	>46_CCC_RLDSK.43.160	>47_CCA_KMTQK.376.160	>48_CCA_EHNAK.248.160	>49_CAT_LSQSR.147.160	>51_CAG_MSHWR.115.160	>52_CAC_LGMRR.142.160
	NNCTCATAATTANN	NNCTATTTAATANN	NNCGTATTAATTNN	NNGTCTAATTANN	NNCTTATTATGANN	NNCTAATTAAGTNN	NNCTGGTTAATGNN	NNCCCATTAACANN	NNCTCATTAAGNN	NNCTAATTAGGTNN	NNACTCATTAACNN	NNCGGATTACANN	NNCCCGTTAATTNN	NNTCGTTAATCCNN	NNCACATTAACANN	NNCCTATTAGTANN	NNCTCATTAACANN	NNTTCATTAATANN	NNATGTATTAAGNN	NNTCTAATTAATNN	NNGGACTAAGTANN	NNGCCACTTACCNN	NNCTACTTAGCCNN	NNACGCCTTAGTNN	NNCGCTTAAGGANN	NNGCGTTAAGGGNN	NNCCGCCTTAAGCNN	NNATCTTAAGGANN	NNCGACTTAAGANN	NNCGTCTTAGAANN	NNAGTCTAAGTANN	NNCGTCTTTATGNN	NNGCCTCTTTACNN	NNGCGTCTCATANN	NNTTCTTAAGCCNN	NNCCTAGTTAACANN	NNGCTCGTTAAGANN	NNATCCGTTAGTNN	NNTCATGTTAGANN	NNGCTCGTTAAGGNN	NNTTAGTTAAGANN	NNATTGGTTAAGNN	NNGCCGGTTAGCNN	NNCCCCAACGGANN	NNTCCTTAACTANN	NNGCTAGTTACTNN	NNGGAGATAACANN	NNCCTGTTATGCNN	NNACGTGTTAAANN
	>1_TTT_RTVAA.82.161	>2_TTT_RTVSA.73.161	>4_TTC_VRVSA.75.161	>5_TTC_TRVAA.122.161	>6_TTA_VRVAA.148.161	>7_TTA_RVLRA.233.161	>8_TGT_RVVSQ.173.161	>9_TGG_KTTQD.102.161	>10_TGG_KSVMQ.83.161	>11_TGA_KSVAQ.137.161	>12_TGA_RGVAA.135.161	>13_TCT_ATVKA.199.161	>14_TCG_KGTQM.61.161	>15_TCC_RMIKS.89.161	>17_TAT_TRVSA.53.161	>18_TAG_RLTQA.111.161	>19_TAG_RMVSA.70.161	>20_TAC_QRVSA.78.161	>21_TAC_ERVSV.100.161	>22_TAA_RITAA.89.161	>23_GTT_GTRAY.149.161	>24_GTG_HLIQY.50.161	>25_GTA_YTRQV.126.161	>26_GGT_ALKNM.47.161	>27_GGT_LTKDQ.187.161	>28_GGG_RSKER.320.161	>29_GGC_TLKNQ.213.161	>30_GGA_LAKDQ.161.161	>31_GCT_KITKF.82.161	>32_GCC_VRLKY.61.161	>33_GCA_ALRQQ.61.161	>34_GAT_RTMRY.45.161	>35_GAG_VMRWY.67.161	>36_GAC_ATRRF.84.161	>37_GAA_RFQKF.39.161	>38_CTA_LHYAK.76.161	>39_CTA_IFNAK.62.161	>40_CGG_STRER.37.161	>41_CGC_RVMSR.90.161	>42_CGA_TFYAA.30.161	>43_CCT_MTNGK.144.161	>44_CCT_RGDSK.92.161	>45_CCG_RCYEK.151.161	>46_CCC_RLDSK.43.161	>47_CCA_KMTQK.376.161	>48_CCA_EHNAK.247.161	>49_CAT_LSQSR.147.161	>51_CAG_MSHWR.114.161	>52_CAC_LGMRR.141.161
	NNGCTAATTAGANN	NNTCTCTTAATANN	NNGCGCATTAGANN	NNGCGCTAATTANN	NNCTAATTAACNN	NNCTAATTAGTANN	NNCGCAATAATGNN	NNCCCATTAACTNN	NNTTCATTAGCGNN	NNCCTAATTAAGNN	NNCCCATTAAGANN	NNTGGCTAATCCNN	NNCCCCATTATGNN	NNAGGATTAAACNN	NNTATACACGAANN	NNCTCATTAAANN	NNCGCATTAAGNN	NNATCGTTAATANN	NNTGTATTAATGNN	NNCTAATTACTTNN	NNGCGATAAGTANN	NNCCACTTAGTTNN	NNAACGTAAGTANN	NNACGCCTTAATNN	NNATTCCTTAAGNN	NNTCCCTTAACCNN	NNCCACCTTAAGNN	NNCTCCTTACTGNN	NNGTCTTAGGGNN	NNGGGCTTAAGANN	NNGCTACTTACGNN	NNCGTCTTAGCCNN	NNGCCTCTTACTNN	NNCGTCTCAGTGNN	NNGTGCTAAGAANN	NNCTAGTTTATGNN	NNCCTAGTTATTNN	NNTCCCGTTACANN	NNTCATGTTAACNN	NNGGTCGTTAATNN	NNGACGGTTAAANN	NNGTTGGTTAAGNN	NNCAGTTAGTGNN	NNAATGGTTAGCNN	NNGATGGTTAATNN	NNGCTGGTCAAANN	NNGCGTGTTAGGNN	NNCTGTTAAATNN	NNGTGTGCTAACNN
	>1_TTT_RTVAA.82.162	>2_TTT_RTVSA.72.162	>4_TTC_VRVSA.75.162	>5_TTC_TRVAA.121.162	>6_TTA_VRVAA.148.162	>7_TTA_RVLRA.233.162	>8_TGT_RVVSQ.172.162	>9_TGG_KTTQD.102.162	>10_TGG_KSVMQ.83.162	>11_TGA_KSVAQ.137.162	>12_TGA_RGVAA.135.162	>13_TCT_ATVKA.193.162	>14_TCG_KGTQM.61.162	>15_TCC_RMIKS.88.162	>17_TAT_TRVSA.52.162	>18_TAG_RLTQA.109.162	>19_TAG_RMVSA.70.162	>20_TAC_QRVSA.78.162	>21_TAC_ERVSV.99.162	>22_TAA_RITAA.88.162	>23_GTT_GTRAY.148.162	>24_GTG_HLIQY.50.162	>25_GTA_YTRQV.126.162	>26_GGT_ALKNM.47.162	>27_GGT_LTKDQ.187.162	>28_GGG_RSKER.319.162	>29_GGC_TLKNQ.212.162	>30_GGA_LAKDQ.161.162	>31_GCT_KITKF.81.162	>32_GCC_VRLKY.61.162	>33_GCA_ALRQQ.61.162	>34_GAT_RTMRY.45.162	>35_GAG_VMRWY.67.162	>36_GAC_ATRRF.83.162	>37_GAA_RFQKF.39.162	>38_CTA_LHYAK.76.162	>39_CTA_IFNAK.61.162	>40_CGG_STRER.37.162	>41_CGC_RVMSR.90.162	>42_CGA_TFYAA.29.162	>43_CCT_MTNGK.144.162	>44_CCT_RGDSK.90.162	>45_CCG_RCYEK.150.162	>46_CCC_RLDSK.43.162	>47_CCA_KMTQK.370.162	>48_CCA_EHNAK.243.162	>49_CAT_LSQSR.146.162	>51_CAG_MSHWR.110.162	>52_CAC_LGMRR.140.162
	NNCTAATTAACNN	NNCGCATTAACGNN	NNATGCATAATGNN	NNACATTAATTANN	NNTAATTAGGGNN	NNTAATTATGTNN	NNACGCATTAAGNN	NNATCCATTAAANN	NNCGCATTAAGCNN	NNCTAATTAATTNN	NNTTGCTAATTANN	NNTAATTAATCCNN	NNTAGGAAACGGNN	NNGCGGATTTAANN	NNGCGCATTATCNN	NNCCCAATTAGGNN	NNCATGTTAATTNN	NNCTCATTAAANN	NNCCGTATTACANN	NNATCAGTCCTTNN	NNGTGATAAGTANN	NNGCCTCTTAAANN	NNGCTACTCAAGNN	NNGCACCTTAAACNN	NNCTGTTAAGGANN	NNTCCCCTTAGANN	NNACGCCTTAGCNN	NNCCCTTAAGGANN	NNCGGCTTAGGCNN	NNTGTCTTATGANN	NNTACTTGAGTANN	NNCTACTTAGGGNN	NNACCTCTCAAGNN	NNCGTCTTAGCNN	NNCCTTCTTAACNN	NNGCTAGTTTAGNN	NNACTCGTTAGCNN	NNGTTACTACCANN	NNTTCTTTAACANN	NNCCTCGTTAACCNN	NNTCGGGTTAACNN	NNTCGGGTTACTNN	NNCTGGTTAACNN	NNACTGGTTAAGNN	NNTCACTAACCANN	NNTTCTTAACTANN	NNGCGTTAACANN	NNCCTGTTAAGTNN	NNTGTGTTAATTNN
	>1_TTT_RTVAA.82.163	>2_TTT_RTVSA.72.163	>4_TTC_VRVSA.75.163	>5_TTC_TRVAA.120.163	>6_TTA_VRVAA.147.163	>7_TTA_RVLRA.233.163	>8_TGT_RVVSQ.171.163	>9_TGG_KTTQD.101.163	>10_TGG_KSVMQ.82.163	>11_TGA_KSVAQ.136.163	>12_TGA_RGVAA.132.163	>13_TCT_ATVKA.192.163	>14_TCG_KGTQM.61.163	>15_TCC_RMIKS.87.163	>17_TAT_TRVSA.52.163	>18_TAG_RLTQA.109.163	>19_TAG_RMVSA.69.163	>20_TAC_QRVSA.78.163	>21_TAC_ERVSV.98.163	>22_TAA_RITAA.86.163	>23_GTT_GTRAY.146.163	>24_GTG_HLIQY.50.163	>25_GTA_YTRQV.125.163	>26_GGT_ALKNM.47.163	>27_GGT_LTKDQ.185.163	>28_GGG_RSKER.317.163	>29_GGC_TLKNQ.211.163	>30_GGA_LAKDQ.160.163	>31_GCT_KITKF.81.163	>32_GCC_VRLKY.61.163	>33_GCA_ALRQQ.61.163	>34_GAT_RTMRY.45.163	>35_GAG_VMRWY.67.163	>36_GAC_ATRRF.83.163	>37_GAA_RFQKF.39.163	>38_CTA_LHYAK.76.163	>39_CTA_IFNAK.61.163	>40_CGG_STRER.36.163	>41_CGC_RVMSR.88.163	>42_CGA_TFYAA.29.163	>43_CCT_MTNGK.144.163	>44_CCT_RGDSK.90.163	>45_CCG_RCYEK.150.163	>46_CCC_RLDSK.43.163	>47_CCA_KMTQK.369.163	>48_CCA_EHNAK.238.163	>49_CAT_LSQSR.145.163	>51_CAG_MSHWR.109.163	>52_CAC_LGMRR.139.163
	NNCCGCTAATTANN	NNGTTGCTAATANN	NNCGTATTACAGNN	NNATGCTAATTANN	NNCCTCATTTAANN	NNGTATTAATTANN	NNCATGTTAATGNN	NNGACCATTAAGNN	NNCTAATTATGANN	NNTTAATTAGTANN	NNTAATTATGTNN	NNAGGATTATGANN	NNCCAATTAATTNN	NNGCGGATTAATGNN	NNTATATTAATANN	NNCCAATTATCCNN	NNTTTACTAATGNN	NNGCGTATTAGANN	NNCGTATTAACNN	NNCCGTCTAAACNN	NNCTACTTAGANN	NNGCCGTAAGTGNN	NNTGACTAAGTANN	NNGTCCAGATCGNN	NNCTCCTTATCGNN	NNAGGTTAAGGGNN	NNACGCCTCAACNN	NNTTCCTTTAAANN	NNCGGCTTATTGNN	NNCTGCTAAGCCNN	NNTGCTTAAGTANN	NNGTCTTAACCNN	NNCCCTCTTTATNN	NNGCGTCTCAATNN	NNGTCCAGAGTGNN	NNGCTAGTTAAACNN	NNCTAGTTAATGNN	NNTCCGTTAGTNN	NNCACGTTAGGGNN	NNAGCTCGTTAANN	NNTCGGGTTAAGNN	NNACGGGTTAGCNN	NNTGGTTTATTNN	NNGCTGGTTATCNN	NNCGGTTAACTANN	NNCTAGTTAAACNN	NNAATCTTAACANN	NNCTGTCAGCCNN	NNTGTGTCAGAGNN
	>1_TTT_RTVAA.81.164	>2_TTT_RTVSA.72.164	>4_TTC_VRVSA.74.164	>5_TTC_TRVAA.119.164	>6_TTA_VRVAA.147.164	>7_TTA_RVLRA.231.164	>8_TGT_RVVSQ.171.164	>9_TGG_KTTQD.100.164	>10_TGG_KSVMQ.81.164	>11_TGA_KSVAQ.134.164	>12_TGA_RGVAA.131.164	>13_TCT_ATVKA.191.164	>14_TCG_KGTQM.61.164	>15_TCC_RMIKS.86.164	>17_TAT_TRVSA.51.164	>18_TAG_RLTQA.108.164	>19_TAG_RMVSA.69.164	>20_TAC_QRVSA.77.164	>21_TAC_ERVSV.97.164	>22_TAA_RITAA.86.164	>23_GTT_GTRAY.146.164	>24_GTG_HLIQY.50.164	>25_GTA_YTRQV.125.164	>26_GGT_ALKNM.46.164	>27_GGT_LTKDQ.180.164	>28_GGG_RSKER.315.164	>29_GGC_TLKNQ.209.164	>30_GGA_LAKDQ.159.164	>31_GCT_KITKF.81.164	>32_GCC_VRLKY.61.164	>33_GCA_ALRQQ.61.164	>34_GAT_RTMRY.45.164	>35_GAG_VMRWY.66.164	>36_GAC_ATRRF.81.164	>37_GAA_RFQKF.39.164	>38_CTA_LHYAK.73.164	>39_CTA_IFNAK.61.164	>40_CGG_STRER.36.164	>41_CGC_RVMSR.88.164	>42_CGA_TFYAA.29.164	>43_CCT_MTNGK.142.164	>44_CCT_RGDSK.89.164	>45_CCG_RCYEK.150.164	>46_CCC_RLDSK.42.164	>47_CCA_KMTQK.367.164	>48_CCA_EHNAK.238.164	>49_CAT_LSQSR.144.164	>51_CAG_MSHWR.108.164	>52_CAC_LGMRR.139.164
	NNTCATTAAAGNN	NNTTTGTTAATANN	NNCTCATTAGCGNN	NNTTTCTAATTANN	NNCTTATTAGGTNN	NNCTAATTATATNN	NNGATGATAATGNN	NNGCCCAGATTGNN	NNTCATTAGCGNN	NNACTCATTAATNN	NNCGACTAATTANN	NNAGCTTAATCCNN	NNCCCATTACGANN	NNGGATTATCTNN	NNCTCATTAAGANN	NNTTCGGACTAGNN	NNCGCATTAACCNN	NNCGCATTTAGANN	NNCGCATTTAGANN	NNATCACTAATTNN	NNCCGAGTAAGANN	NNCCCACTTTAGNN	NNCGACTAAGTANN	NNATCCAGATTGNN	NNCTCCTTACTGNN	NNTTCCCTCAAANN	NNGCGCCTTAATGNN	NNGTTCCTTAATNN	NNGTTCTTAAGANN	NNTGTCTAAGAANN	NNATGCTGAGTANN	NNGCGTCTTAGANN	NNCCCTCTTAGTANN	NNCGTCTTAGCCNN	NNCTTCTTAGTTNN	NNTAGTTAAACNN	NNACTAGTTAACCNN	NNCAGAGGAACTNN	NNGCACGTTAAANN	NNGCTAGTTAAGNN	NNCCAAGTTATTNN	NNCGCTTAACCANN	NNGATGCTAAACNN	NNCGGGTTACGTNN	NNCTCCTAACCANN	NNGATTTAACCANN	NNTAGGCTAACANN	NNCCTGTTACACNN	NNTCGTGTTATCNN
	>1_TTT_RTVAA.81.165	>2_TTT_RTVSA.71.165	>4_TTC_VRVSA.74.165	>5_TTC_TRVAA.119.165	>6_TTA_VRVAA.146.165	>7_TTA_RVLRA.230.165	>8_TGT_RVVSQ.169.165	>9_TGG_KTTQD.99.165	>10_TGG_KSVMQ.81.165	>11_TGA_KSVAQ.133.165	>12_TGA_RGVAA.131.165	>13_TCT_ATVKA.187.165	>14_TCG_KGTQM.60.165	>15_TCC_RMIKS.86.165	>17_TAT_TRVSA.51.165	>18_TAG_RLTQA.108.165	>19_TAG_RMVSA.69.165	>20_TAC_QRVSA.76.165	>21_TAC_ERVSV.96.165	>22_TAA_RITAA.86.165	>23_GTT_GTRAY.145.165	>24_GTG_HLIQY.50.165	>25_GTA_YTRQV.125.165	>26_GGT_ALKNM.46.165	>27_GGT_LTKDQ.180.165	>28_GGG_RSKER.310.165	>29_GGC_TLKNQ.205.165	>30_GGA_LAKDQ.159.165	>31_GCT_KITKF.80.165	>32_GCC_VRLKY.61.165	>33_GCA_ALRQQ.58.165	>34_GAT_RTMRY.44.165	>35_GAG_VMRWY.65.165	>36_GAC_ATRRF.80.165	>37_GAA_RFQKF.39.165	>38_CTA_LHYAK.72.165	>39_CTA_IFNAK.60.165	>40_CGG_STRER.36.165	>41_CGC_RVMSR.88.165	>42_CGA_TFYAA.29.165	>43_CCT_MTNGK.141.165	>44_CCT_RGDSK.89.165	>45_CCG_RCYEK.147.165	>46_CCC_RLDSK.42.165	>47_CCA_KMTQK.366.165	>48_CCA_EHNAK.237.165	>49_CAT_LSQSR.144.165	>51_CAG_MSHWR.104.165	>52_CAC_LGMRR.137.165
	NNACTCATTAAANN	NNGTCACTAATTNN	NNCAAATTAATTNN	NNACCGTAATTANN	NNAGCTTAATTANN	NNGGGCTAATTANN	NNGCGCATTAACNN	NNTCCCATTAAGANN	NNCGCATTAACGNN	NNTTCATTAAAANN	NNTACGTTAATTNN	NNTGGATTAGAANN	NNTACGTCTCTTNN	NNACGGATTAATNN	NNCGTATTATATNN	NNCAATTAGCANN	NNCGCACTAATTNN	NNCTCCTTAATANN	NNTGCATTAATANN	NNTAATTATTGNN	NNAGGCTAAGTANN	NNCACCTAAGTGNN	NNTACTTAGACNN	NNCACCTTAAGTNN	NNCTTCCTTAAGNN	NNGAATTAAGGGNN	NNCGCCTTACAGNN	NNTATCCTTTAGNN	NNCAGCTTAAGCNN	NNTTCGTAAGCCNN	NNCTACTTAATNN	NNTGTCTTAAGCNN	NNCCTCTCAGGCNN	NNCGTCTCAAGNN	NNACGTTAAGCCNN	NNCTAGTTAGATNN	NNCTAGTTAATTNN	NNACCCGTTAATTNN	NNTCTCTAACANN	NNACTCGTTACCNN	NNTTCGGTTAAANN	NNTCGGGTTAGTGNN	NNCTGGTTAGGGNN	NNCGGGTTACTANN	NNAGTTAACCANN	NNCTGGTTACAGNN	NNGGATTTAACANN	NNCCTGTCAGTANN	NNCCGTGTTTAANN
	>1_TTT_RTVAA.80.166	>2_TTT_RTVSA.71.166	>4_TTC_VRVSA.74.166	>5_TTC_TRVAA.119.166	>6_TTA_VRVAA.145.166	>7_TTA_RVLRA.230.166	>8_TGT_RVVSQ.169.166	>9_TGG_KTTQD.99.166	>10_TGG_KSVMQ.81.166	>11_TGA_KSVAQ.132.166	>12_TGA_RGVAA.131.166	>13_TCT_ATVKA.187.166	>14_TCG_KGTQM.59.166	>15_TCC_RMIKS.85.166	>17_TAT_TRVSA.51.166	>18_TAG_RLTQA.107.166	>19_TAG_RMVSA.68.166	>20_TAC_QRVSA.75.166	>21_TAC_ERVSV.96.166	>22_TAA_RITAA.84.166	>23_GTT_GTRAY.143.166	>24_GTG_HLIQY.49.166	>25_GTA_YTRQV.124.166	>26_GGT_ALKNM.46.166	>27_GGT_LTKDQ.179.166	>28_GGG_RSKER.310.166	>29_GGC_TLKNQ.205.166	>30_GGA_LAKDQ.159.166	>31_GCT_KITKF.79.166	>32_GCC_VRLKY.61.166	>33_GCA_ALRQQ.57.166	>34_GAT_RTMRY.43.166	>35_GAG_VMRWY.64.166	>36_GAC_ATRRF.80.166	>37_GAA_RFQKF.39.166	>38_CTA_LHYAK.72.166	>39_CTA_IFNAK.59.166	>40_CGG_STRER.36.166	>41_CGC_RVMSR.87.166	>42_CGA_TFYAA.29.166	>43_CCT_MTNGK.141.166	>44_CCT_RGDSK.89.166	>45_CCG_RCYEK.145.166	>46_CCC_RLDSK.41.166	>47_CCA_KMTQK.363.166	>48_CCA_EHNAK.236.166	>49_CAT_LSQSR.144.166	>51_CAG_MSHWR.100.166	>52_CAC_LGMRR.137.166
	NNTTCATTAGCGNN	NNCTATTTACAGNN	NNCGTTTTAATANN	NNCCATTAATTANN	NNCCTAATTAAGTNN	NNTCTTTAATTANN	NNCTTCATAATGNN	NNCCCATTAGTNN	NNTGCATTAGAGNN	NNCTCATTACTGNN	NNCTAATTAGGNN	NNAGGATAATCCNN	NNCCCATTACTGNN	NNCCGGATTAGTGNN	NNGCGCATTAGTNN	NNTCCAATTATGNN	NNTAATTAGAGNN	NNCGTATTATCTNN	NNACGTATTAACNN	NNCGCCTAATTANN	NNCACATAAGTANN	NNTCCACTTATCNN	NNAACCTAAGTANN	NNTCGCCTTACANN	NNTTCCTTAGTTNN	NNCCCCTTATGNN	NNTCGCCTTATCNN	NNCTCCTTTAGNN	NNAGGCTTAGTGNN	NNTGGCTTAAGGNN	NNTCGTTAAGTANN	NNCGTCTTGAGANN	NNCCTCTTGAGANN	NNCGTCTTGACGNN	NNGCTTCTTAATNN	NNGCTGGTTAGCNN	NNGCTCGTCTCANN	NNGAAGTCAGGGNN	NNAACTTTAACANN	NNTCGTTAGGANN	NNGTGGGTTAACNN	NNGCGCGTTAAANN	NNCCCGGTTAATNN	NNGCTGGTTAGGNN	NNATGGTTAAGANN	NNCATGGTTAAGNN	NNCGTGTTAGTGNN	NNCTGTTATGTNN	NNCGTGTTAATCNN
	>1_TTT_RTVAA.80.167	>2_TTT_RTVSA.71.167	>4_TTC_VRVSA.74.167	>5_TTC_TRVAA.115.167	>6_TTA_VRVAA.145.167	>7_TTA_RVLRA.230.167	>8_TGT_RVVSQ.169.167	>9_TGG_KTTQD.96.167	>10_TGG_KSVMQ.81.167	>11_TGA_KSVAQ.132.167	>12_TGA_RGVAA.129.167	>13_TCT_ATVKA.186.167	>14_TCG_KGTQM.58.167	>15_TCC_RMIKS.85.167	>17_TAT_TRVSA.50.167	>18_TAG_RLTQA.107.167	>19_TAG_RMVSA.68.167	>20_TAC_QRVSA.75.167	>21_TAC_ERVSV.94.167	>22_TAA_RITAA.82.167	>23_GTT_GTRAY.141.167	>24_GTG_HLIQY.49.167	>25_GTA_YTRQV.123.167	>26_GGT_ALKNM.46.167	>27_GGT_LTKDQ.178.167	>28_GGG_RSKER.309.167	>29_GGC_TLKNQ.205.167	>30_GGA_LAKDQ.157.167	>31_GCT_KITKF.79.167	>32_GCC_VRLKY.60.167	>33_GCA_ALRQQ.56.167	>34_GAT_RTMRY.43.167	>35_GAG_VMRWY.64.167	>36_GAC_ATRRF.80.167	>37_GAA_RFQKF.39.167	>38_CTA_LHYAK.72.167	>39_CTA_IFNAK.59.167	>40_CGG_STRER.34.167	>41_CGC_RVMSR.87.167	>42_CGA_TFYAA.29.167	>43_CCT_MTNGK.139.167	>44_CCT_RGDSK.84.167	>45_CCG_RCYEK.144.167	>46_CCC_RLDSK.41.167	>47_CCA_KMTQK.353.167	>48_CCA_EHNAK.234.167	>49_CAT_LSQSR.144.167	>51_CAG_MSHWR.100.167	>52_CAC_LGMRR.136.167
	NNTTAATTAATANN	NNGCGCTTAATANN	NNCGCATTACTANN	NNGGCTTAATTANN	NNCTCATTAGANN	NNACGTTAATTANN	NNCACATTAAGGNN	NNGTCCATTAATANN	NNCCCATTATGCNN	NNGCTCATTACGNN	NNCCGCTAATTANN	NNCTGGATTAAANN	NNGTCAATTACGNN	NNGGATTAGGANN	NNATCATTAATGNN	NNACCAATTAAANN	NNTCACATTAATNN	NNTCGTATTATGNN	NNGCGCATTATANN	NNTAATTAGCANN	NNTCCATAAGTANN	NNGTGCTAAGTGNN	NNCTACTTAACCNN	NNCCGCCTTAAGTNN	NNGTTCCTTAACNN	NNTCCCCTCAACNN	NNGCGCCTCAACNN	NNCTCCTTATGTNN	NNGCAGCTTAAGNN	NNCGTCTTAAAGNN	NNAAACTAAGTANN	NNGTCTTATAGNN	NNGCCTCTCAATNN	NNCGTCTTGTAANN	NNCCTACTTATGNN	NNGCTAGTTAGGNN	NNGCTAGTCAAANN	NNTCCGTTAACTNN	NNGTAGTTAACANN	NNCCTCGTTAAACNN	NNCTGGTTACAGNN	NNCGTGAACATTNN	NNTCTGGTTAAGNN	NNGCGGGGTAACNN	NNCTTTAACCANN	NNTAGTTATAGNN	NNGTATTTAACANN	NNTCCTGTTATTNN	NNTGTGTCAAACNN
	>1_TTT_RTVAA.79.168	>2_TTT_RTVSA.71.168	>4_TTC_VRVSA.73.168	>5_TTC_TRVAA.114.168	>6_TTA_VRVAA.144.168	>7_TTA_RVLRA.230.168	>8_TGT_RVVSQ.169.168	>9_TGG_KTTQD.96.168	>10_TGG_KSVMQ.80.168	>11_TGA_KSVAQ.126.168	>12_TGA_RGVAA.129.168	>13_TCT_ATVKA.185.168	>14_TCG_KGTQM.58.168	>15_TCC_RMIKS.84.168	>17_TAT_TRVSA.50.168	>18_TAG_RLTQA.99.168	>19_TAG_RMVSA.68.168	>20_TAC_QRVSA.73.168	>21_TAC_ERVSV.91.168	>22_TAA_RITAA.82.168	>23_GTT_GTRAY.140.168	>24_GTG_HLIQY.49.168	>25_GTA_YTRQV.122.168	>26_GGT_ALKNM.45.168	>27_GGT_LTKDQ.177.168	>28_GGG_RSKER.302.168	>29_GGC_TLKNQ.205.168	>30_GGA_LAKDQ.155.168	>31_GCT_KITKF.79.168	>32_GCC_VRLKY.60.168	>33_GCA_ALRQQ.56.168	>34_GAT_RTMRY.43.168	>35_GAG_VMRWY.64.168	>36_GAC_ATRRF.79.168	>37_GAA_RFQKF.38.168	>38_CTA_LHYAK.72.168	>39_CTA_IFNAK.58.168	>40_CGG_STRER.34.168	>41_CGC_RVMSR.87.168	>42_CGA_TFYAA.29.168	>43_CCT_MTNGK.138.168	>44_CCT_RGDSK.84.168	>45_CCG_RCYEK.144.168	>46_CCC_RLDSK.41.168	>47_CCA_KMTQK.353.168	>48_CCA_EHNAK.234.168	>49_CAT_LSQSR.140.168	>51_CAG_MSHWR.100.168	>52_CAC_LGMRR.135.168
	NNTTAATTAAGTNN	NNCGTATTAAGTNN	NNTTAATTAAGTNN	NNGACTTAATGANN	NNCTTATTAATGNN	NNCTTAATTAAANN	NNCACATTAAGTNN	NNCCCATTAAGCNN	NNTAATTATGANN	NNCTCATTACGCNN	NNTCTAATTAATNN	NNGCGGATTATANN	NNTCCCATTAGANN	NNTAATTAATCCNN	NNGCCCAGATTGNN	NNCTCATTAGAGNN	NNCATATTAGGGNN	NNGCGTATTTAGNN	NNCATATTAGTGNN	NNCGTATTAGTGNN	NNCGCCTAAGTANN	NNGGCACTTAATNN	NNTCCGTAAGTANN	NNTTCATTAGTGNN	NNTGTTTAAGGANN	NNCCCTTAATGNN	NNGCCTTAAACNN	NNCTCCTTACTANN	NNGTGTTAAGCCNN	NNTTCCTAAGCCNN	NNCTACTTACCANN	NNCGTTTTAAGANN	NNCTCTCAGGANN	NNCCGTCTTAAGNN	NNGCTTCTTAACGNN	NNCTAGTTAGAANN	NNACTCGTTAGTGNN	NNTTTACGTCTCNN	NNCATCTTAACANN	NNTCTAGTTAAGNN	NNTTAGGTTAAANN	NNTCAGGTTACANN	NNCCGGTTACTANN	NNGTCCATATTGNN	NNTCATTAACTANN	NNATCTTAACCANN	NNGGTGCTAACANN	NNCCCTGTTACTNN	NNTCGTGTTATGNN
	>1_TTT_RTVAA.79.169	>2_TTT_RTVSA.71.169	>4_TTC_VRVSA.72.169	>5_TTC_TRVAA.114.169	>6_TTA_VRVAA.143.169	>7_TTA_RVLRA.228.169	>8_TGT_RVVSQ.168.169	>9_TGG_KTTQD.96.169	>10_TGG_KSVMQ.80.169	>11_TGA_KSVAQ.126.169	>12_TGA_RGVAA.128.169	>13_TCT_ATVKA.185.169	>14_TCG_KGTQM.58.169	>15_TCC_RMIKS.84.169	>17_TAT_TRVSA.50.169	>18_TAG_RLTQA.98.169	>19_TAG_RMVSA.66.169	>20_TAC_QRVSA.72.169	>21_TAC_ERVSV.91.169	>22_TAA_RITAA.81.169	>23_GTT_GTRAY.139.169	>24_GTG_HLIQY.48.169	>25_GTA_YTRQV.122.169	>26_GGT_ALKNM.45.169	>27_GGT_LTKDQ.176.169	>28_GGG_RSKER.288.169	>29_GGC_TLKNQ.203.169	>30_GGA_LAKDQ.154.169	>31_GCT_KITKF.79.169	>32_GCC_VRLKY.60.169	>33_GCA_ALRQQ.56.169	>34_GAT_RTMRY.43.169	>35_GAG_VMRWY.63.169	>36_GAC_ATRRF.78.169	>37_GAA_RFQKF.38.169	>38_CTA_LHYAK.71.169	>39_CTA_IFNAK.58.169	>40_CGG_STRER.33.169	>41_CGC_RVMSR.87.169	>42_CGA_TFYAA.28.169	>43_CCT_MTNGK.138.169	>44_CCT_RGDSK.84.169	>45_CCG_RCYEK.142.169	>46_CCC_RLDSK.40.169	>47_CCA_KMTQK.352.169	>48_CCA_EHNAK.233.169	>49_CAT_LSQSR.139.169	>51_CAG_MSHWR.98.169	>52_CAC_LGMRR.133.169
	NNTTCATTAGCANN	NNCTAATTACGANN	NNCATATTAGTANN	NNATCTTAATTANN	NNCTTATTAACGNN	NNATAGTAATTANN	NNCTCGATAATGNN	NNGAACCTACTTNN	NNGTCCAGATTANN	NNTGCTTAATTANN	NNTCCCATTAAGNN	NNAGGATTAACGNN	NNGCCCATTAGTGNN	NNGGATTAAGTNN	NNTGAGATAATGNN	NNTCAATTAATCNN	NNTTCCTTAATANN	NNCGTATTAGTNN	NNTGCTTAATTANN	NNTCATTAACGNN	NNCTACTTATANN	NNCCCACTTTGANN	NNGCTACTTAATNN	NNACGCCTTAAAANN	NNCTCCTTACTCNN	NNCCCCTCAAAGNN	NNGCGCCTTAGGGNN	NNCTCCTTATCCNN	NNGTGTCTTAACNN	NNTTCCTAAGCTNN	NNGCATTAAGTANN	NNCATCTTATGTNN	NNGCCTCTCATGNN	NNGCGTCTTAGGNN	NNTTCTTAACGNN	NNGCTAGTTAGTCNN	NNTCTGGTTATANN	NNAAAAGGATTCNN	NNGTCACTAACANN	NNACTCGTTTACNN	NNGATGGTTAGANN	NNCCGGGTTAATANN	NNTGGTTATAGNN	NNGTCCAGATCGNN	NNCTAGTTATGNN	NNTGACTAACTANN	NNCTGGCTAACANN	NNGCCTGTTATCTNN	NNCGTGTTATTTNN
	>1_TTT_RTVAA.79.170	>2_TTT_RTVSA.71.170	>4_TTC_VRVSA.72.170	>5_TTC_TRVAA.114.170	>6_TTA_VRVAA.142.170	>7_TTA_RVLRA.228.170	>8_TGT_RVVSQ.167.170	>9_TGG_KTTQD.95.170	>10_TGG_KSVMQ.80.170	>11_TGA_KSVAQ.125.170	>12_TGA_RGVAA.127.170	>13_TCT_ATVKA.181.170	>14_TCG_KGTQM.57.170	>15_TCC_RMIKS.83.170	>17_TAT_TRVSA.50.170	>18_TAG_RLTQA.97.170	>19_TAG_RMVSA.66.170	>20_TAC_QRVSA.70.170	>21_TAC_ERVSV.90.170	>22_TAA_RITAA.81.170	>23_GTT_GTRAY.139.170	>24_GTG_HLIQY.48.170	>25_GTA_YTRQV.117.170	>26_GGT_ALKNM.45.170	>27_GGT_LTKDQ.175.170	>28_GGG_RSKER.282.170	>29_GGC_TLKNQ.201.170	>30_GGA_LAKDQ.154.170	>31_GCT_KITKF.79.170	>32_GCC_VRLKY.59.170	>33_GCA_ALRQQ.56.170	>34_GAT_RTMRY.42.170	>35_GAG_VMRWY.63.170	>36_GAC_ATRRF.78.170	>37_GAA_RFQKF.37.170	>38_CTA_LHYAK.71.170	>39_CTA_IFNAK.56.170	>40_CGG_STRER.33.170	>41_CGC_RVMSR.86.170	>42_CGA_TFYAA.28.170	>43_CCT_MTNGK.137.170	>44_CCT_RGDSK.83.170	>45_CCG_RCYEK.139.170	>46_CCC_RLDSK.40.170	>47_CCA_KMTQK.351.170	>48_CCA_EHNAK.233.170	>49_CAT_LSQSR.138.170	>51_CAG_MSHWR.97.170	>52_CAC_LGMRR.133.170
	NNCTCATTAATNN	NNCTCATTAAGGNN	NNCGCATTAGCCNN	NNGTAATTAATGNN	NNCTCATTATAANN	NNCCGTTAATTANN	NNTCAGCTAATGNN	NNCCATTAAGCNN	NNTCATTAAGCNN	NNCTCATTAGCNN	NNTTCATTATCANN	NNCGGATTATGNN	NNCCATTAGGGNN	NNTTGTTAATCCNN	NNCGACTTAATGNN	NNCCAATTATTCNN	NNGTTAATTAGTNN	NNGCGCATTACGNN	NNACGCATTATCNN	NNTAATTAAGTNN	NNGTCATAAGTANN	NNACACTTAAGANN	NNCTGATAAGTANN	NNACGCCTTACANN	NNCCTCCTTATGANN	NNGCCCCTTAATGNN	NNCGCCTCAATANN	NNACTCCTTATGNN	NNCGGCTTAGGGNN	NNTCCTTAAGAANN	NNTGACTAAGTANN	NNCATCTTATGANN	NNCCCTCTTCAANN	NNGCGTCTTAACNN	NNAACTACTTAAANN	NNTCTAGTTATCNN	NNTCGTTAGTGNN	NNTCCCGTTTAANN	NNCGTGTTATGGNN	NNACTCGTTATTNN	NNCTAGTTAGCANN	NNGCGGTTAACGNN	NNCTGGTTACGANN	NNCCGTCTAAACNN	NNCTTTTAACTANN	NNAGATGGTTAANN	NNCAATTTAACANN	NNCTGTTAAAANN	NNCGTGTTAGTANN
	>1_TTT_RTVAA.79.171	>2_TTT_RTVSA.70.171	>4_TTC_VRVSA.72.171	>5_TTC_TRVAA.112.171	>6_TTA_VRVAA.141.171	>7_TTA_RVLRA.228.171	>8_TGT_RVVSQ.167.171	>9_TGG_KTTQD.95.171	>10_TGG_KSVMQ.80.171	>11_TGA_KSVAQ.124.171	>12_TGA_RGVAA.126.171	>13_TCT_ATVKA.181.171	>14_TCG_KGTQM.57.171	>15_TCC_RMIKS.83.171	>17_TAT_TRVSA.50.171	>18_TAG_RLTQA.97.171	>19_TAG_RMVSA.66.171	>20_TAC_QRVSA.69.171	>21_TAC_ERVSV.87.171	>22_TAA_RITAA.81.171	>23_GTT_GTRAY.138.171	>24_GTG_HLIQY.48.171	>25_GTA_YTRQV.117.171	>26_GGT_ALKNM.44.171	>27_GGT_LTKDQ.175.171	>28_GGG_RSKER.280.171	>29_GGC_TLKNQ.200.171	>30_GGA_LAKDQ.152.171	>31_GCT_KITKF.78.171	>32_GCC_VRLKY.59.171	>33_GCA_ALRQQ.56.171	>34_GAT_RTMRY.42.171	>35_GAG_VMRWY.63.171	>36_GAC_ATRRF.77.171	>37_GAA_RFQKF.37.171	>38_CTA_LHYAK.71.171	>39_CTA_IFNAK.55.171	>40_CGG_STRER.33.171	>41_CGC_RVMSR.86.171	>42_CGA_TFYAA.28.171	>43_CCT_MTNGK.137.171	>44_CCT_RGDSK.81.171	>45_CCG_RCYEK.138.171	>46_CCC_RLDSK.39.171	>47_CCA_KMTQK.347.171	>48_CCA_EHNAK.233.171	>49_CAT_LSQSR.137.171	>51_CAG_MSHWR.97.171	>52_CAC_LGMRR.131.171
	NNCTAGTTAATTNN	NNTGCAGGAATTNN	NNCGCATTAGGCNN	NNGAGATAATTANN	NNAGTGTGACTANN	NNTCATTAATTANN	NNATTGCTAATGNN	NNATCCATTATANN	NNTCAATTAACANN	NNGTTAATTAAANN	NNTTCTCTAATTNN	NNTGTCTAATCCNN	NNGTCCAGATCGNN	NNAGGGATTATGNN	NNCCCCTTAATGNN	NNTCATTAATGNN	NNCAAATTAGTANN	NNGCATTAGTGNN	NNGCGTATTAAANN	NNTCATTAACTNN	NNACTACTTAACNN	NNGATCTAAGTGNN	NNCTACTTGAGTNN	NNCGCCTTATGNN	NNCTCCTTATAANN	NNACCCCTTAGTNN	NNACGCCTTTAGNN	NNTCCTTAAGANN	NNAGCTTAAGANN	NNCGGCTTAACCNN	NNGCTGCTTAAGNN	NNGTCTTAATGNN	NNGCCTCTTACANN	NNTCGTCTTACGNN	NNTTCTTAGTANN	NNGCTAGTTATGTNN	NNTCGTTAGTCNN	NNGCCCGTTATGNN	NNGCGTGTTAGTNN	NNACTCGTTCAGNN	NNTGGTTAAACNN	NNAATGGTTAAGNN	NNTCGGTTAGGGNN	NNGTNCAGATTGNN	NNAGATTGACTANN	NNTCTGGTTATGNN	NNCGTGTTAAAANN	NNGCCTGTTTGANN	NNCTGTGTCAACNN
	>1_TTT_RTVAA.78.172	>2_TTT_RTVSA.70.172	>4_TTC_VRVSA.72.172	>5_TTC_TRVAA.112.172	>6_TTA_VRVAA.141.172	>7_TTA_RVLRA.225.172	>8_TGT_RVVSQ.165.172	>9_TGG_KTTQD.94.172	>10_TGG_KSVMQ.79.172	>11_TGA_KSVAQ.123.172	>12_TGA_RGVAA.125.172	>13_TCT_ATVKA.181.172	>14_TCG_KGTQM.57.172	>15_TCC_RMIKS.82.172	>17_TAT_TRVSA.47.172	>18_TAG_RLTQA.97.172	>19_TAG_RMVSA.66.172	>20_TAC_QRVSA.69.172	>21_TAC_ERVSV.87.172	>22_TAA_RITAA.80.172	>23_GTT_GTRAY.138.172	>24_GTG_HLIQY.48.172	>25_GTA_YTRQV.117.172	>26_GGT_ALKNM.44.172	>27_GGT_LTKDQ.174.172	>28_GGG_RSKER.280.172	>29_GGC_TLKNQ.200.172	>30_GGA_LAKDQ.152.172	>31_GCT_KITKF.78.172	>32_GCC_VRLKY.59.172	>33_GCA_ALRQQ.55.172	>34_GAT_RTMRY.42.172	>35_GAG_VMRWY.62.172	>36_GAC_ATRRF.75.172	>37_GAA_RFQKF.36.172	>38_CTA_LHYAK.70.172	>39_CTA_IFNAK.55.172	>40_CGG_STRER.33.172	>41_CGC_RVMSR.85.172	>42_CGA_TFYAA.27.172	>43_CCT_MTNGK.136.172	>44_CCT_RGDSK.81.172	>45_CCG_RCYEK.138.172	>46_CCC_RLDSK.39.172	>47_CCA_KMTQK.347.172	>48_CCA_EHNAK.232.172	>49_CAT_LSQSR.136.172	>51_CAG_MSHWR.96.172	>52_CAC_LGMRR.130.172
	NNCTTATTAATGNN	NNCGAGTTAATTNN	NNTAATTAGAGNN	NNGGGCTAATTANN	NNCGCTTAATTANN	NNATTAATTAGTNN	NNATGGTTAATGNN	NNACCCATTATGANN	NNGCCATTAGCANN	NNTAATTAAGTNN	NNCCGTTAATTANN	NNTGGATTATAGNN	NNAACCATCAATNN	NNATGCTATCTTNN	NNCGTCTTAATGNN	NNCTCATTAGGGNN	NNGCCACTAATGNN	NNCCTATTAATGNN	NNTGTATTAACANN	NNCGGTTAATTANN	NNGTTATAAGTANN	NNATCAGTCCTTNN	NNTGATTAAGTANN	NNGCACCTTAATANN	NNGCGCTAAGGANN	NNTCCCTCAAGNN	NNTCGCCTTAAGTNN	NNTGGCTAAGGANN	NNCGGCTTAGTNN	NNGCGTTAAGAANN	NNCCCCTAAGTANN	NNGCGTCTTATGNN	NNCCTCTCATGANN	NNGCGTCTTAACGNN	NNCTTCTTAGGTNN	NNTAGTTAATCNN	NNTCTAGTTATGNN	NNCCCGTTAATNN	NNCACGTTAACANN	NNGCTTGTTAATNN	NNTTCGTTAACCNN	NNACGGGTTATCNN	NNCTGGTTAATNN	NNCCGGGTTAACCNN	NNCAATTAACTANN	NNGGCTTAACTANN	NNCTTTATAACTNN	NNCTGTCAAAGNN	NNGCGTGTTTCANN
	>1_TTT_RTVAA.78.173	>2_TTT_RTVSA.70.173	>4_TTC_VRVSA.71.173	>5_TTC_TRVAA.111.173	>6_TTA_VRVAA.138.173	>7_TTA_RVLRA.222.173	>8_TGT_RVVSQ.163.173	>9_TGG_KTTQD.94.173	>10_TGG_KSVMQ.79.173	>11_TGA_KSVAQ.122.173	>12_TGA_RGVAA.123.173	>13_TCT_ATVKA.178.173	>14_TCG_KGTQM.56.173	>15_TCC_RMIKS.82.173	>17_TAT_TRVSA.47.173	>18_TAG_RLTQA.96.173	>19_TAG_RMVSA.65.173	>20_TAC_QRVSA.68.173	>21_TAC_ERVSV.87.173	>22_TAA_RITAA.80.173	>23_GTT_GTRAY.137.173	>24_GTG_HLIQY.47.173	>25_GTA_YTRQV.117.173	>26_GGT_ALKNM.44.173	>27_GGT_LTKDQ.174.173	>28_GGG_RSKER.279.173	>29_GGC_TLKNQ.198.173	>30_GGA_LAKDQ.150.173	>31_GCT_KITKF.78.173	>32_GCC_VRLKY.59.173	>33_GCA_ALRQQ.55.173	>34_GAT_RTMRY.41.173	>35_GAG_VMRWY.62.173	>36_GAC_ATRRF.74.173	>37_GAA_RFQKF.36.173	>38_CTA_LHYAK.70.173	>39_CTA_IFNAK.55.173	>40_CGG_STRER.33.173	>41_CGC_RVMSR.85.173	>42_CGA_TFYAA.27.173	>43_CCT_MTNGK.135.173	>44_CCT_RGDSK.81.173	>45_CCG_RCYEK.136.173	>46_CCC_RLDSK.39.173	>47_CCA_KMTQK.345.173	>48_CCA_EHNAK.232.173	>49_CAT_LSQSR.136.173	>51_CAG_MSHWR.95.173	>52_CAC_LGMRR.130.173
	NNCTGTTAATTANN	NNCTCATTAAGTNN	NNTGAATTAATANN	NNATGTTAATTANN	NNCCTTATTAAGNN	NNATCTTAATTANN	NNTCACTTAATGNN	NNGCCCATTAGAANN	NNTCATTAGAANN	NNTCTCATTATANN	NNGCTAATTATANN	NNGCATTAATCCNN	NNTCCATTAGAANN	NNCGCCACTTCANN	NNTACATAATGGNN	NNCCAATTACGGNN	NNCTTATTAGTGNN	NNCGTATTTAGANN	NNCCGCATTAAAGNN	NNGCTAATTAACANN	NNAGGTTAAGTANN	NNGCCATAAGTGNN	NNGATTTAAGTANN	NNGCACCTCAAANN	NNGCCTTAAGGANN	NNCCCCTTAGGCNN	NNCCGCCTTAGCGNN	NNCCTCCTTAACANN	NNGGCTTAATGNN	NNCTTCTAAGAANN	NNAACGTAAGTANN	NNCCGTCTTAACGNN	NNCCTCTCACGANN	NNCGTCTTGACNN	NNCTTCTTACGANN	NNCTGGTTAAGANN	NNCCTAGTTAAGGNN	NNCAACGTATTNN	NNCCGTGTTAGGNN	NNACTCGTTAAGANN	NNGTTGGTTAGGNN	NNCCGGGTTAAGNN	NNCGGTTAGTANN	NNTCGGGTTAATANN	NNTGCTTAACCANN	NNGGTAGTTAGTNN	NNCAGTTTAACANN	NNTCCTGTTATCNN	NNTGTGTTAGGANN
	>1_TTT_RTVAA.77.174	>2_TTT_RTVSA.70.174	>4_TTC_VRVSA.71.174	>5_TTC_TRVAA.108.174	>6_TTA_VRVAA.138.174	>7_TTA_RVLRA.219.174	>8_TGT_RVVSQ.161.174	>9_TGG_KTTQD.94.174	>10_TGG_KSVMQ.78.174	>11_TGA_KSVAQ.122.174	>12_TGA_RGVAA.122.174	>13_TCT_ATVKA.178.174	>14_TCG_KGTQM.55.174	>15_TCC_RMIKS.82.174	>17_TAT_TRVSA.47.174	>18_TAG_RLTQA.95.174	>19_TAG_RMVSA.65.174	>20_TAC_QRVSA.68.174	>21_TAC_ERVSV.86.174	>22_TAA_RITAA.79.174	>23_GTT_GTRAY.136.174	>24_GTG_HLIQY.46.174	>25_GTA_YTRQV.116.174	>26_GGT_ALKNM.44.174	>27_GGT_LTKDQ.174.174	>28_GGG_RSKER.279.174	>29_GGC_TLKNQ.195.174	>30_GGA_LAKDQ.150.174	>31_GCT_KITKF.77.174	>32_GCC_VRLKY.58.174	>33_GCA_ALRQQ.55.174	>34_GAT_RTMRY.41.174	>35_GAG_VMRWY.62.174	>36_GAC_ATRRF.73.174	>37_GAA_RFQKF.36.174	>38_CTA_LHYAK.70.174	>39_CTA_IFNAK.54.174	>40_CGG_STRER.32.174	>41_CGC_RVMSR.82.174	>42_CGA_TFYAA.27.174	>43_CCT_MTNGK.135.174	>44_CCT_RGDSK.81.174	>45_CCG_RCYEK.136.174	>46_CCC_RLDSK.39.174	>47_CCA_KMTQK.345.174	>48_CCA_EHNAK.231.174	>49_CAT_LSQSR.135.174	>51_CAG_MSHWR.95.174	>52_CAC_LGMRR.129.174
	NNTAACTAATTANN	NNGCATTAACANN	NNCGCGTTAATANN	NNCCTCATTAAANN	NNCTAATTTACANN	NNAAATTAGCANN	NNCATATTAATGNN	NNTCCCATTAGAGNN	NNATCCATTAACNN	NNCTAATTAAAGNN	NNTCATTAAGCNN	NNAGGGATTAATNN	NNCCCATTATANN	NNGCGGATTAGTANN	NNTTGCCTAATGNN	NNCTTGTTAGGGNN	NNCACATTACGANN	NNCTCATTAATTNN	NNCCGCATTAACANN	NNTTAATTAGTGNN	NNCTACTTATAGNN	NNCCACTTAAGTGNN	NNTCCCTAAGTANN	NNCTAATTAAGGNN	NNTCCTTAAAANN	NNCTCCCTTAACNN	NNGCGCCTTTGTNN	NNCCTCCTTACANN	NNCGGCTTAGCTNN	NNGCGCTAAGCCNN	NNATTGCAAGTANN	NNTTCCTTAAGANN	NNCCTCTTCAGNN	NNCGTCTTACTTNN	NNGGCTTTAAGANN	NNCCTGGTTAAGNN	NNTAGTTAAAANN	NNACCCGTTATCNN	NNCGCGTTATTANN	NNCTAGTTAGTGNN	NNTTGGTTATAANN	NNGCTGGTTAATNN	NNCTGGTTACAANN	NNGCTGGTTATANN	NNCTGGTTAGAGNN	NNGTCCAGATCANN	NNAATATTAACANN	NNCCTGTTTACANN	NNTGTGCTAAGGNN
	>1_TTT_RTVAA.74.175	>2_TTT_RTVSA.70.175	>4_TTC_VRVSA.70.175	>5_TTC_TRVAA.107.175	>6_TTA_VRVAA.137.175	>7_TTA_RVLRA.218.175	>8_TGT_RVVSQ.160.175	>9_TGG_KTTQD.92.175	>10_TGG_KSVMQ.77.175	>11_TGA_KSVAQ.121.175	>12_TGA_RGVAA.122.175	>13_TCT_ATVKA.177.175	>14_TCG_KGTQM.55.175	>15_TCC_RMIKS.81.175	>17_TAT_TRVSA.47.175	>18_TAG_RLTQA.94.175	>19_TAG_RMVSA.64.175	>20_TAC_QRVSA.67.175	>21_TAC_ERVSV.86.175	>22_TAA_RITAA.78.175	>23_GTT_GTRAY.135.175	>24_GTG_HLIQY.46.175	>25_GTA_YTRQV.115.175	>26_GGT_ALKNM.43.175	>27_GGT_LTKDQ.169.175	>28_GGG_RSKER.278.175	>29_GGC_TLKNQ.195.175	>30_GGA_LAKDQ.150.175	>31_GCT_KITKF.76.175	>32_GCC_VRLKY.58.175	>33_GCA_ALRQQ.54.175	>34_GAT_RTMRY.41.175	>35_GAG_VMRWY.62.175	>36_GAC_ATRRF.73.175	>37_GAA_RFQKF.36.175	>38_CTA_LHYAK.69.175	>39_CTA_IFNAK.54.175	>40_CGG_STRER.32.175	>41_CGC_RVMSR.82.175	>42_CGA_TFYAA.27.175	>43_CCT_MTNGK.131.175	>44_CCT_RGDSK.80.175	>45_CCG_RCYEK.136.175	>46_CCC_RLDSK.38.175	>47_CCA_KMTQK.345.175	>48_CCA_EHNAK.230.175	>49_CAT_LSQSR.135.175	>51_CAG_MSHWR.94.175	>52_CAC_LGMRR.129.175
	NNTCATTAGTGNN	NNCCTAATTAAGNN	NNGCTCATTAAGNN	NNTTCCTAATTANN	NNGCTAATTTAGNN	NNAGCGTAATTANN	NNCGCATTATAANN	NNATCCATTATCNN	NNCTCATTATTGNN	NNTTCATTAAGNN	NNCTAATTATAGNN	NNCGGATTAAGCNN	NNCGTTCTTTAANN	NNGGATTAAGCNN	NNCGCATTAATNN	NNTCAATTAACCNN	NNTTCATTAATTNN	NNCTTATTAACCNN	NNGCGCATTACCNN	NNCTAGTTAATTNN	NNATCTCAAGTANN	NNTGGTTAAGTGNN	NNACTACTTAAANN	NNCCGCCTTAGAGNN	NNTTCCTTACGTNN	NNAGTGCTTCACNN	NNCACCTTAAGTNN	NNCTTCTAAGGANN	NNGGTCTTAATGNN	NNGGGCTTAATGNN	NNGCCGTAAGTANN	NNCGTCTTAGCNN	NNCCTCTTCGAGNN	NNCGTCTCACGNN	NNGGTTCTTAAGGNN	NNTCTAGTTATGNN	NNCTCGTTAGGANN	NNCCCGTTATGANN	NNCGCGTTACGTNN	NNATCAGTCCTTNN	NNTGGGTTAGTGNN	NNCGGGTTAAACNN	NNTTGGTTAGTGNN	NNCGGGTTAAGNN	NNCTGGTTAATGNN	NNTCTGGTTAAGNN	NNGCGCTTAACANN	NNGACTGTTAACNN	NNGTGTGTCATTNN
	>1_TTT_RTVAA.73.176	>2_TTT_RTVSA.70.176	>4_TTC_VRVSA.69.176	>5_TTC_TRVAA.107.176	>6_TTA_VRVAA.135.176	>7_TTA_RVLRA.217.176	>8_TGT_RVVSQ.160.176	>9_TGG_KTTQD.91.176	>10_TGG_KSVMQ.76.176	>11_TGA_KSVAQ.121.176	>12_TGA_RGVAA.122.176	>13_TCT_ATVKA.177.176	>14_TCG_KGTQM.55.176	>15_TCC_RMIKS.81.176	>17_TAT_TRVSA.47.176	>18_TAG_RLTQA.92.176	>19_TAG_RMVSA.64.176	>20_TAC_QRVSA.67.176	>21_TAC_ERVSV.85.176	>22_TAA_RITAA.78.176	>23_GTT_GTRAY.134.176	>24_GTG_HLIQY.46.176	>25_GTA_YTRQV.115.176	>26_GGT_ALKNM.43.176	>27_GGT_LTKDQ.168.176	>28_GGG_RSKER.276.176	>29_GGC_TLKNQ.192.176	>30_GGA_LAKDQ.149.176	>31_GCT_KITKF.76.176	>32_GCC_VRLKY.58.176	>33_GCA_ALRQQ.54.176	>34_GAT_RTMRY.41.176	>35_GAG_VMRWY.61.176	>36_GAC_ATRRF.72.176	>37_GAA_RFQKF.35.176	>38_CTA_LHYAK.68.176	>39_CTA_IFNAK.53.176	>40_CGG_STRER.32.176	>41_CGC_RVMSR.81.176	>42_CGA_TFYAA.27.176	>43_CCT_MTNGK.129.176	>44_CCT_RGDSK.79.176	>45_CCG_RCYEK.134.176	>46_CCC_RLDSK.38.176	>47_CCA_KMTQK.339.176	>48_CCA_EHNAK.230.176	>49_CAT_LSQSR.134.176	>51_CAG_MSHWR.93.176	>52_CAC_LGMRR.129.176
	NNCTAATTACGNN	NNTTCGTTAATTNN	NNCGCATTAATCNN	NNGCGATAATTANN	NNCCTAATCAATNN	NNCTAATTACACNN	NNTCACATTAAANN	NNGCCCATTAGGGNN	NNTCATTAGCANN	NNCTTCATTAATNN	NNTCTAATTAGANN	NNCTGGATTAAGNN	NNCCCATTATCCNN	NNGTCTTAATCCNN	NNTCTCTTAATGNN	NNCCCAATCAACNN	NNCCTGTTAATTNN	NNTCGTATTAGTNN	NNCGCATTATTGNN	NNCTTATTAGTANN	NNCCTACTTAGGNN	NNGCCACTTACTNN	NNGCCGTAAGTANN	NNGGCCAGATTGNN	NNTCCTTAATCNN	NNCCCCTAAGGGNN	NNGCGCCTTAGAGNN	NNGCTCCTTATGNN	NNAGCTTATCANN	NNTTCTTAAGCTNN	NNCTACTTACAANN	NNGGAAGCCGATNN	NNCCTCTTATATNN	NNCGTCTCACCANN	NNGGTTCTTTGTNN	NNCTAGTTACAANN	NNACTCGTTAAGANN	NNCCCGTTAAATNN	NNCGCGTTAAGTNN	NNGCTCGTCAAANN	NNGTAGGTTAGANN	NNACATATAAANN	NNCCTGGTTAAGANN	NNCCTAGTTAAANN	NNGCTGGTTTAGNN	NNTCTGGTTACGNN	NNTCGTGTTAAGNN	NNCCTGTTAGCNN	NNTGTGTTAGCANN
	>1_TTT_RTVAA.72.177	>2_TTT_RTVSA.70.177	>4_TTC_VRVSA.69.177	>5_TTC_TRVAA.106.177	>6_TTA_VRVAA.132.177	>7_TTA_RVLRA.216.177	>8_TGT_RVVSQ.159.177	>9_TGG_KTTQD.91.177	>10_TGG_KSVMQ.76.177	>11_TGA_KSVAQ.121.177	>12_TGA_RGVAA.121.177	>13_TCT_ATVKA.174.177	>14_TCG_KGTQM.54.177	>15_TCC_RMIKS.80.177	>17_TAT_TRVSA.46.177	>18_TAG_RLTQA.92.177	>19_TAG_RMVSA.64.177	>20_TAC_QRVSA.66.177	>21_TAC_ERVSV.83.177	>22_TAA_RITAA.76.177	>23_GTT_GTRAY.133.177	>24_GTG_HLIQY.46.177	>25_GTA_YTRQV.113.177	>26_GGT_ALKNM.43.177	>27_GGT_LTKDQ.167.177	>28_GGG_RSKER.275.177	>29_GGC_TLKNQ.191.177	>30_GGA_LAKDQ.148.177	>31_GCT_KITKF.76.177	>32_GCC_VRLKY.58.177	>33_GCA_ALRQQ.54.177	>34_GAT_RTMRY.41.177	>35_GAG_VMRWY.61.177	>36_GAC_ATRRF.71.177	>37_GAA_RFQKF.35.177	>38_CTA_LHYAK.68.177	>39_CTA_IFNAK.53.177	>40_CGG_STRER.31.177	>41_CGC_RVMSR.80.177	>42_CGA_TFYAA.27.177	>43_CCT_MTNGK.128.177	>44_CCT_RGDSK.79.177	>45_CCG_RCYEK.130.177	>46_CCC_RLDSK.38.177	>47_CCA_KMTQK.331.177	>48_CCA_EHNAK.225.177	>49_CAT_LSQSR.134.177	>51_CAG_MSHWR.93.177	>52_CAC_LGMRR.129.177
	NNGTACTTAATTNN	NNAGCATTAATANN	NNCGCATTATAGNN	NNCAGTTAATTANN	NNCCTAATTAACNN	NNTCAGTAATTANN	NNTCTTTTAATGNN	NNCCCATTATCCNN	NNTGCGCATCGGNN	NNTCCTTAATGANN	NNACCCATTAACNN	NNTGGATTAGTCNN	NNGTCCATTAGTNN	NNGGATTAAAANN	NNGATGCTAATGNN	NNCTCGTTAGGGNN	NNACGCATTAAGNN	NNCGAATTAGTGNN	NNCTGTATTAAGNN	NNTCATACACTGNN	NNGCGCATGAGANN	NNTCACTAAGTANN	NNTTTTTAAGTANN	NNCGCCTTAAATNN	NNTTCCTTAGACNN	NNCCCCTTAGCTNN	NNATCAGTCCTTNN	NNTTCCTTATTANN	NNCAGCTTAATANN	NNGGCTTAAGAANN	NNTACTTAGCTNN	NNCGTCTTAATNN	NNTCCTCTTAATNN	NNCGTCTTCATGNN	NNGAAAAAACTGNN	NNACTAGTTATGNN	NNTCTAGTTACANN	NNGTCCGTTTAANN	NNTCGTGTTATGNN	NNCCTCGTTAGAANN	NNCTCGTTAACCNN	NNCCGGGTTAGTGNN	NNATTGGTTAATNN	NNGTCCAGATTANN	NNACACTAACTANN	NNATGGTTAATGNN	NNGCTACTAACANN	NNCTGTTATAGNN	NNCTGTGTCAAGNN
	>1_TTT_RTVAA.72.178	>2_TTT_RTVSA.70.178	>4_TTC_VRVSA.69.178	>5_TTC_TRVAA.105.178	>6_TTA_VRVAA.132.178	>7_TTA_RVLRA.214.178	>8_TGT_RVVSQ.159.178	>9_TGG_KTTQD.90.178	>10_TGG_KSVMQ.75.178	>11_TGA_KSVAQ.120.178	>12_TGA_RGVAA.121.178	>13_TCT_ATVKA.174.178	>14_TCG_KGTQM.54.178	>15_TCC_RMIKS.80.178	>17_TAT_TRVSA.46.178	>18_TAG_RLTQA.91.178	>19_TAG_RMVSA.64.178	>20_TAC_QRVSA.66.178	>21_TAC_ERVSV.83.178	>22_TAA_RITAA.76.178	>23_GTT_GTRAY.133.178	>24_GTG_HLIQY.46.178	>25_GTA_YTRQV.111.178	>26_GGT_ALKNM.43.178	>27_GGT_LTKDQ.166.178	>28_GGG_RSKER.274.178	>29_GGC_TLKNQ.190.178	>30_GGA_LAKDQ.146.178	>31_GCT_KITKF.75.178	>32_GCC_VRLKY.58.178	>33_GCA_ALRQQ.54.178	>34_GAT_RTMRY.40.178	>35_GAG_VMRWY.61.178	>36_GAC_ATRRF.71.178	>37_GAA_RFQKF.35.178	>38_CTA_LHYAK.65.178	>39_CTA_IFNAK.52.178	>40_CGG_STRER.31.178	>41_CGC_RVMSR.80.178	>42_CGA_TFYAA.26.178	>43_CCT_MTNGK.128.178	>44_CCT_RGDSK.79.178	>45_CCG_RCYEK.127.178	>46_CCC_RLDSK.38.178	>47_CCA_KMTQK.331.178	>48_CCA_EHNAK.224.178	>49_CAT_LSQSR.133.178	>51_CAG_MSHWR.93.178	>52_CAC_LGMRR.128.178
	NNCTAATTACACNN	NNTATATTAATANN	NNTTCATTAGTGNN	NNCTAATTAATTNN	NNCCTAATTACGANN	NNATTGTAATTANN	NNACCATTAATGNN	NNCCCATTACTNN	NNCGCATTAATTNN	NNTCTCATTAGGNN	NNACTAATTAACNN	NNCGGATTACGNN	NNCCTATTAGCANN	NNGCCCTAATCCNN	NNCGCATTAACNN	NNGTCCAGATTANN	NNGCTAATTATGNN	NNCGCACTAATANN	NNCGCATTATGCNN	NNCCGCTAATTANN	NNTGACTAAGTANN	NNGACACTTAAANN	NNATATTAAGTANN	NNTCGCCTTAAAANN	NNCCTCCTTAAGTNN	NNATCCCTCAAGNN	NNGCGCCTTAGTANN	NNCCTCCTTACGNN	NNCAGCTTAGTANN	NNAATCTAAGCCNN	NNTCTATAAGTANN	NNGTCTTACGANN	NNCCTCTTTAAANN	NNGCGTCTCAGGNN	NNGCTTCTTAAGGNN	NNGCTAGTTATANN	NNACTCGTTATTNN	NNTCGGGTTAAGNN	NNATTATTAACANN	NNACTCGTTAGGGNN	NNCTAGTTAGTGNN	NNTCTAGTTAAGNN	NNCCTGGTTAATGNN	NNTGCGTATCGANN	NNCACCTAACTANN	NNGTGTTAACCANN	NNTCCATTAACANN	NNCTGTTAAAGNN	NNGTGTGTAACGNN
	>1_TTT_RTVAA.71.179	>2_TTT_RTVSA.69.179	>4_TTC_VRVSA.69.179	>5_TTC_TRVAA.104.179	>6_TTA_VRVAA.131.179	>7_TTA_RVLRA.214.179	>8_TGT_RVVSQ.158.179	>9_TGG_KTTQD.90.179	>10_TGG_KSVMQ.75.179	>11_TGA_KSVAQ.120.179	>12_TGA_RGVAA.120.179	>13_TCT_ATVKA.173.179	>14_TCG_KGTQM.53.179	>15_TCC_RMIKS.79.179	>17_TAT_TRVSA.46.179	>18_TAG_RLTQA.90.179	>19_TAG_RMVSA.64.179	>20_TAC_QRVSA.66.179	>21_TAC_ERVSV.82.179	>22_TAA_RITAA.76.179	>23_GTT_GTRAY.132.179	>24_GTG_HLIQY.46.179	>25_GTA_YTRQV.110.179	>26_GGT_ALKNM.43.179	>27_GGT_LTKDQ.166.179	>28_GGG_RSKER.274.179	>29_GGC_TLKNQ.189.179	>30_GGA_LAKDQ.144.179	>31_GCT_KITKF.75.179	>32_GCC_VRLKY.57.179	>33_GCA_ALRQQ.53.179	>34_GAT_RTMRY.40.179	>35_GAG_VMRWY.59.179	>36_GAC_ATRRF.69.179	>37_GAA_RFQKF.35.179	>38_CTA_LHYAK.65.179	>39_CTA_IFNAK.52.179	>40_CGG_STRER.31.179	>41_CGC_RVMSR.80.179	>42_CGA_TFYAA.26.179	>43_CCT_MTNGK.127.179	>44_CCT_RGDSK.79.179	>45_CCG_RCYEK.125.179	>46_CCC_RLDSK.37.179	>47_CCA_KMTQK.327.179	>48_CCA_EHNAK.222.179	>49_CAT_LSQSR.133.179	>51_CAG_MSHWR.93.179	>52_CAC_LGMRR.127.179
	NNCTTAATTAAANN	NNCATGCTATGANN	NNCGTGCTAATANN	NNAACTAATTANN	NNCTCATTAACANN	NNCTCATTAAGANN	NNTACATTAATANN	NNACCCATTAGAGNN	NNCCCATTAAGNN	NNTCATTAAGANN	NNTAATTAAGGNN	NNGGGATTAACANN	NNATCCAGATTGNN	NNCGGATTATCNN	NNTGCATTAGCANN	NNCTTATTAAGANN	NNCGTATTAAGTNN	NNTGCATTAAGGNN	NNCGCATTACGNN	NNTCATTAGCANN	NNATCGTAAGTANN	NNGGCGTAAGTGNN	NNGCTGTAAGTANN	NNGCGCCTTAGANN	NNTCCTTAGAGNN	NNTCCCTTAAGCNN	NNGCGCCTTAACGNN	NNCTCCTTACGGNN	NNCGGCTTATGGNN	NNCAACTAAGCCNN	NNTACTTAAAANN	NNCATCTTAAGNN	NNCCCTCTTTAGGNN	NNCGTCTTTACANN	NNGCTTCTTAAAGNN	NNACTGGTTAGTNN	NNCTAGTTACANN	NNCCCGTTACGNN	NNGCGTGTTATANN	NNCTCGTTAGGNN	NNTAGGTTAAGANN	NNACTGGTTAAANN	NNTCTGGTTAAANN	NNGCACGTTAGTNN	NNGCTAGTTACTNN	NNAGTTAACTANN	NNTCTCTAACANN	NNTCCTGTCAAGNN	NNGCGTGTTTGGNN
	>1_TTT_RTVAA.71.180	>2_TTT_RTVSA.69.180	>4_TTC_VRVSA.69.180	>5_TTC_TRVAA.104.180	>6_TTA_VRVAA.130.180	>7_TTA_RVLRA.212.180	>8_TGT_RVVSQ.156.180	>9_TGG_KTTQD.89.180	>10_TGG_KSVMQ.74.180	>11_TGA_KSVAQ.120.180	>12_TGA_RGVAA.119.180	>13_TCT_ATVKA.172.180	>14_TCG_KGTQM.53.180	>15_TCC_RMIKS.79.180	>17_TAT_TRVSA.46.180	>18_TAG_RLTQA.89.180	>19_TAG_RMVSA.64.180	>20_TAC_QRVSA.65.180	>21_TAC_ERVSV.81.180	>22_TAA_RITAA.76.180	>23_GTT_GTRAY.130.180	>24_GTG_HLIQY.45.180	>25_GTA_YTRQV.110.180	>26_GGT_ALKNM.42.180	>27_GGT_LTKDQ.164.180	>28_GGG_RSKER.265.180	>29_GGC_TLKNQ.189.180	>30_GGA_LAKDQ.143.180	>31_GCT_KITKF.74.180	>32_GCC_VRLKY.57.180	>33_GCA_ALRQQ.53.180	>34_GAT_RTMRY.40.180	>35_GAG_VMRWY.59.180	>36_GAC_ATRRF.68.180	>37_GAA_RFQKF.35.180	>38_CTA_LHYAK.65.180	>39_CTA_IFNAK.51.180	>40_CGG_STRER.31.180	>41_CGC_RVMSR.80.180	>42_CGA_TFYAA.26.180	>43_CCT_MTNGK.127.180	>44_CCT_RGDSK.79.180	>45_CCG_RCYEK.124.180	>46_CCC_RLDSK.37.180	>47_CCA_KMTQK.326.180	>48_CCA_EHNAK.219.180	>49_CAT_LSQSR.132.180	>51_CAG_MSHWR.92.180	>52_CAC_LGMRR.127.180
	NNTCTCATTAAGNN	NNCCCGTTAATANN	NNGTAGCCAATGNN	NNAGGTTAATTANN	NNCCTAATTAGCANN	NNATAATTAGCANN	NNATCGCTAATGNN	NNTCTACGCGAGNN	NNTCCCATTAAGNN	NNCTCATTACTTNN	NNTAATTAGCANN	NNCGGATTAGTNN	NNCCCATTAATNN	NNCGGATTAAANN	NNGGTCTTAATGNN	NNTTCAATTAACNN	NNCGAATTAATANN	NNCGTATTAGANN	NNCTGTATTAACNN	NNTTCATTAGTGNN	NNATTATAAGTANN	NNCCCACTCAACNN	NNTATATAAGTANN	NNTCGCCTTAGGNN	NNCTCCTTTGCANN	NNCCCCCTTAGCNN	NNGCGCCTTCATNN	NNGTTCCTTATCNN	NNTTATTAAGCCNN	NNTCACTAAGAANN	NNATCAGTCCTTNN	NNCGTCTTACCGNN	NNCCTCTTAATCNN	NNCGTCTTCGCANN	NNGCTTCTTAGGNN	NNACTAGTTATANN	NNGCTCGTTAATANN	NNTTCCGTTAGTNN	NNGGAGTTAACANN	NNTCTCGTTACGNN	NNAAAGGTTAACNN	NNCGGGTTAAGCNN	NNTCCGGTTAGANN	NNTGTGCATCGANN	NNAGCTTAACTANN	NNTAGTTAACCNN	NNCTCTTTAACANN	NNCCTGTTTGTTNN	NNGCGTGTTATTNN
	>1_TTT_RTVAA.71.181	>2_TTT_RTVSA.69.181	>4_TTC_VRVSA.69.181	>5_TTC_TRVAA.103.181	>6_TTA_VRVAA.129.181	>7_TTA_RVLRA.210.181	>8_TGT_RVVSQ.156.181	>9_TGG_KTTQD.88.181	>10_TGG_KSVMQ.74.181	>11_TGA_KSVAQ.120.181	>12_TGA_RGVAA.119.181	>13_TCT_ATVKA.172.181	>14_TCG_KGTQM.52.181	>15_TCC_RMIKS.79.181	>17_TAT_TRVSA.45.181	>18_TAG_RLTQA.89.181	>19_TAG_RMVSA.63.181	>20_TAC_QRVSA.65.181	>21_TAC_ERVSV.80.181	>22_TAA_RITAA.74.181	>23_GTT_GTRAY.130.181	>24_GTG_HLIQY.45.181	>25_GTA_YTRQV.110.181	>26_GGT_ALKNM.42.181	>27_GGT_LTKDQ.164.181	>28_GGG_RSKER.264.181	>29_GGC_TLKNQ.188.181	>30_GGA_LAKDQ.143.181	>31_GCT_KITKF.74.181	>32_GCC_VRLKY.56.181	>33_GCA_ALRQQ.53.181	>34_GAT_RTMRY.39.181	>35_GAG_VMRWY.59.181	>36_GAC_ATRRF.68.181	>37_GAA_RFQKF.35.181	>38_CTA_LHYAK.65.181	>39_CTA_IFNAK.51.181	>40_CGG_STRER.30.181	>41_CGC_RVMSR.79.181	>42_CGA_TFYAA.26.181	>43_CCT_MTNGK.126.181	>44_CCT_RGDSK.79.181	>45_CCG_RCYEK.123.181	>46_CCC_RLDSK.37.181	>47_CCA_KMTQK.323.181	>48_CCA_EHNAK.215.181	>49_CAT_LSQSR.132.181	>51_CAG_MSHWR.91.181	>52_CAC_LGMRR.126.181
	NNGTTGCTAATTNN	NNTCCGTTAATANN	NNTTAATTAGCGNN	NNAGATTAATTANN	NNGTCCTAATTANN	NNCTCATTATGANN	NNCACATTAATANN	NNGTCCATTAATGNN	NNGGCTTAATGANN	NNACTCATTAGANN	NNGCTAATTAACANN	NNATATTAATCCNN	NNTCATTAACGNN	NNGAGGATTAGGNN	NNCGGCTTAATGNN	NNCTTGTTAGAGNN	NNGGTGCTAATGNN	NNGTATTAGTGNN	NNCCGTATTAGTGNN	NNTTCATTAATANN	NNCGCTCAAGTANN	NNTTGCTAAGTANN	NNCAATTAAGTANN	NNGCCTTAGAGNN	NNCTCCTTACGTNN	NNGCCCCTTATGNN	NNTCACCTTAACNN	NNTTCCTTAAACNN	NNCCCTTAAGCCNN	NNTAGTTAAGCTNN	NNCTACTTAGCGNN	NNTGTCTTAACCNN	NNCCCTCTCCATANN	NNTCCTGACAGTNN	NNGTCCAGATCGNN	NNCCTAGTTAGAGNN	NNACTAGTTAACANN	NNTCCGTTACGANN	NNACGTTAAGGNN	NNCCTCGTTATCANN	NNTCAGGTTAAANN	NNCCGGGTTTAANN	NNTCAGTTAAGANN	NNGCAGGTTAGTNN	NNCGCCTAACCANN	NNGTATTAACCANN	NNATAGTTAACANN	NNCCTGTCAATNN	NNTGTGTAAGGANN
	>1_TTT_RTVAA.70.182	>2_TTT_RTVSA.69.182	>4_TTC_VRVSA.68.182	>5_TTC_TRVAA.103.182	>6_TTA_VRVAA.128.182	>7_TTA_RVLRA.209.182	>8_TGT_RVVSQ.156.182	>9_TGG_KTTQD.88.182	>10_TGG_KSVMQ.73.182	>11_TGA_KSVAQ.119.182	>12_TGA_RGVAA.118.182	>13_TCT_ATVKA.170.182	>14_TCG_KGTQM.51.182	>15_TCC_RMIKS.77.182	>17_TAT_TRVSA.45.182	>18_TAG_RLTQA.87.182	>19_TAG_RMVSA.62.182	>20_TAC_QRVSA.65.182	>21_TAC_ERVSV.80.182	>22_TAA_RITAA.72.182	>23_GTT_GTRAY.129.182	>24_GTG_HLIQY.44.182	>25_GTA_YTRQV.109.182	>26_GGT_ALKNM.42.182	>27_GGT_LTKDQ.162.182	>28_GGG_RSKER.262.182	>29_GGC_TLKNQ.187.182	>30_GGA_LAKDQ.142.182	>31_GCT_KITKF.74.182	>32_GCC_VRLKY.56.182	>33_GCA_ALRQQ.53.182	>34_GAT_RTMRY.39.182	>35_GAG_VMRWY.58.182	>36_GAC_ATRRF.68.182	>37_GAA_RFQKF.34.182	>38_CTA_LHYAK.64.182	>39_CTA_IFNAK.51.182	>40_CGG_STRER.30.182	>41_CGC_RVMSR.79.182	>42_CGA_TFYAA.26.182	>43_CCT_MTNGK.125.182	>44_CCT_RGDSK.79.182	>45_CCG_RCYEK.122.182	>46_CCC_RLDSK.37.182	>47_CCA_KMTQK.322.182	>48_CCA_EHNAK.214.182	>49_CAT_LSQSR.132.182	>51_CAG_MSHWR.91.182	>52_CAC_LGMRR.125.182
	NNGCTAATTACANN	NNTCCATTAATTNN	NNGCGTATTACGNN	NNTAATTAGATNN	NNTAATTAGATNN	NNGCTAATTATGNN	NNGGGTTTAATGNN	NNGCCCATTAATTNN	NNGTCCATTAGTNN	NNTAATTAGAGNN	NNTAATTAGCGNN	NNCAGGATTAAGNN	NNCGCTTAATTANN	NNGCGGATTACGNN	NNTGCATTAAGGNN	NNTCAATTAAGGNN	NNTGCGCTAATANN	NNGCTAATTAACNN	NNCGTATTATATNN	NNCTCATTAATNN	NNGCTACTTAAANN	NNCGGTTAAGTGNN	NNAGTATAAGTANN	NNCGCCTTATAANN	NNCTCCTTTACNN	NNTTCCCTTAACNN	NNCGCCTTACCANN	NNTTCCTTATGNN	NNGGTGTTAAGCNN	NNCGGCTTAAGGNN	NNTGCTCAAGTANN	NNCTACTTAATGNN	NNCCTCTTCTGANN	NNCGTCTCCACNN	NNGTCCAGCTTGNN	NNACTGGTTAATNN	NNAGTAGTTAATNN	NNCCCCGTTTAANN	NNCGCGTTATGGNN	NNAGTCGTTAGCNN	NNCTAGGTTAAANN	NNACTGGTTACGNN	NNGACGGTTAGANN	NNGTCCAGATCANN	NNGCACTAACTANN	NNACTAGTTAGTNN	NNCGCCTTAACANN	NNCCTGTCAATCNN	NNCCGTGTTATGNN
	>1_TTT_RTVAA.69.183	>2_TTT_RTVSA.68.183	>4_TTC_VRVSA.68.183	>5_TTC_TRVAA.102.183	>6_TTA_VRVAA.126.183	>7_TTA_RVLRA.208.183	>8_TGT_RVVSQ.155.183	>9_TGG_KTTQD.87.183	>10_TGG_KSVMQ.73.183	>11_TGA_KSVAQ.117.183	>12_TGA_RGVAA.117.183	>13_TCT_ATVKA.170.183	>14_TCG_KGTQM.51.183	>15_TCC_RMIKS.77.183	>17_TAT_TRVSA.44.183	>18_TAG_RLTQA.87.183	>19_TAG_RMVSA.62.183	>20_TAC_QRVSA.64.183	>21_TAC_ERVSV.80.183	>22_TAA_RITAA.72.183	>23_GTT_GTRAY.128.183	>24_GTG_HLIQY.44.183	>25_GTA_YTRQV.108.183	>26_GGT_ALKNM.41.183	>27_GGT_LTKDQ.161.183	>28_GGG_RSKER.258.183	>29_GGC_TLKNQ.186.183	>30_GGA_LAKDQ.141.183	>31_GCT_KITKF.74.183	>32_GCC_VRLKY.55.183	>33_GCA_ALRQQ.53.183	>34_GAT_RTMRY.39.183	>35_GAG_VMRWY.58.183	>36_GAC_ATRRF.67.183	>37_GAA_RFQKF.34.183	>38_CTA_LHYAK.64.183	>39_CTA_IFNAK.50.183	>40_CGG_STRER.30.183	>41_CGC_RVMSR.77.183	>42_CGA_TFYAA.25.183	>43_CCT_MTNGK.124.183	>44_CCT_RGDSK.78.183	>45_CCG_RCYEK.121.183	>46_CCC_RLDSK.36.183	>47_CCA_KMTQK.317.183	>48_CCA_EHNAK.214.183	>49_CAT_LSQSR.131.183	>51_CAG_MSHWR.90.183	>52_CAC_LGMRR.123.183
	NNCTCATTATTGNN	NNTTCCCTAATGNN	NNTGAGTTAATANN	NNCTGATAATTANN	NNACTAATTATCNN	NNCGTCTAATTANN	NNATTCCTAATGNN	NNTTTGAAGCATNN	NNTCATTAACTNN	NNCTTCATTAGTNN	NNGCTAATTATGNN	NNAAATTAATCCNN	NNTCAATTAGTCNN	NNTTTGCTAATCNN	NNTTCACTAATGNN	NNTCAATTATTGNN	NNTACACTAATGNN	NNCGCATTATTGNN	NNCGTATTAACGNN	NNCTCGTTAGGGNN	NNTCGGTAAGTANN	NNGCGCTAAGTANN	NNACTATAAGTANN	NNGCACCTTACGNN	NNCCTCCTTTAGNN	NNCCCCTTAGCCNN	NNGCGCCTTAGANN	NNTTCCTTATCCNN	NNCGGCTTAGAGNN	NNACCCTAAGACNN	NNCTACTTATCANN	NNCTACTTAACGNN	NNGCCTCTTTATNN	NNCGTCTTCGAGNN	NNGCTACTTTATNN	NNTCTAGTTAGTNN	NNCCTAGTTAACCNN	NNATCCGTTAAANN	NNACGCGTTAACNN	NNGCTCGTTCATNN	NNTCAGGTTATGNN	NNAGCACGTCACNN	NNCCGGTTAGTTNN	NNGNCCAGATTGNN	NNCCGCTAACCANN	NNATATTAACTANN	NNAGTTTTAACANN	NNCCTGTTTGTGNN	NNCGTGTTAATNN
	>1_TTT_RTVAA.69.184	>2_TTT_RTVSA.67.184	>4_TTC_VRVSA.67.184	>5_TTC_TRVAA.101.184	>6_TTA_VRVAA.126.184	>7_TTA_RVLRA.206.184	>8_TGT_RVVSQ.153.184	>9_TGG_KTTQD.86.184	>10_TGG_KSVMQ.72.184	>11_TGA_KSVAQ.116.184	>12_TGA_RGVAA.117.184	>13_TCT_ATVKA.168.184	>14_TCG_KGTQM.51.184	>15_TCC_RMIKS.77.184	>17_TAT_TRVSA.44.184	>18_TAG_RLTQA.86.184	>19_TAG_RMVSA.61.184	>20_TAC_QRVSA.64.184	>21_TAC_ERVSV.80.184	>22_TAA_RITAA.72.184	>23_GTT_GTRAY.128.184	>24_GTG_HLIQY.44.184	>25_GTA_YTRQV.108.184	>26_GGT_ALKNM.41.184	>27_GGT_LTKDQ.161.184	>28_GGG_RSKER.257.184	>29_GGC_TLKNQ.184.184	>30_GGA_LAKDQ.141.184	>31_GCT_KITKF.73.184	>32_GCC_VRLKY.55.184	>33_GCA_ALRQQ.52.184	>34_GAT_RTMRY.39.184	>35_GAG_VMRWY.58.184	>36_GAC_ATRRF.67.184	>37_GAA_RFQKF.34.184	>38_CTA_LHYAK.63.184	>39_CTA_IFNAK.50.184	>40_CGG_STRER.29.184	>41_CGC_RVMSR.76.184	>42_CGA_TFYAA.25.184	>43_CCT_MTNGK.124.184	>44_CCT_RGDSK.78.184	>45_CCG_RCYEK.117.184	>46_CCC_RLDSK.36.184	>47_CCA_KMTQK.315.184	>48_CCA_EHNAK.212.184	>49_CAT_LSQSR.131.184	>51_CAG_MSHWR.90.184	>52_CAC_LGMRR.122.184
	NNGCGTTAATTANN	NNGGCGTTAATANN	NNTAGTTAATTANN	NNGGCATAATTANN	NNCTCTTAATTANN	NNTTCATTAGGGNN	NNAGCCCTAATGNN	NNTCCCATTAATGNN	NNTGCATTAACANN	NNACTCATTATCNN	NNCTCATTAAAANN	NNATGCTAATCCNN	NNCCAATTAAGANN	NNCGGATTATGCNN	NNGCGCATTACANN	NNTCCAATTATANN	NNCCTATTAATTNN	NNTCGCATTAAANN	NNCGCATTAGCNN	NNCTAATTACGNN	NNAAATTAAGTANN	NNGATGCTAAACNN	NNCTACTTACTANN	NNTGCTTAATTANN	NNTTCCTTACTANN	NNCCCCTCAGCANN	NNTCGCCTCAAANN	NNCTCCTTTGTGNN	NNCGGCTTACAGNN	NNCGGTTAAGCCNN	NNGCTCCAAGTANN	NNCGTCTTACATNN	NNCCTCTCAAGCNN	NNCCGTCTTATGNN	NNCCTTCTTATGNN	NNACTGCAAAAGNN	NNGCTAGTTTATNN	NNGTCCGCACGGNN	NNGAACTTAACANN	NNGCTCGTTAGGGNN	NNTTAGGTTAAGNN	NNCCGGGTTAGTNN	NNCCGGTTATTGNN	NNCGGGTTAATNN	NNCTGCTAACCANN	NNGCTTTAACCANN	NNTTGCCTGACANN	NNCCCTGTTAAGCNN	NNGCGTGTCTAANN
	>1_TTT_RTVAA.69.185	>2_TTT_RTVSA.65.185	>4_TTC_VRVSA.67.185	>5_TTC_TRVAA.101.185	>6_TTA_VRVAA.126.185	>7_TTA_RVLRA.206.185	>8_TGT_RVVSQ.151.185	>9_TGG_KTTQD.85.185	>10_TGG_KSVMQ.72.185	>11_TGA_KSVAQ.115.185	>12_TGA_RGVAA.116.185	>13_TCT_ATVKA.167.185	>14_TCG_KGTQM.51.185	>15_TCC_RMIKS.75.185	>17_TAT_TRVSA.44.185	>18_TAG_RLTQA.85.185	>19_TAG_RMVSA.61.185	>20_TAC_QRVSA.64.185	>21_TAC_ERVSV.78.185	>22_TAA_RITAA.72.185	>23_GTT_GTRAY.127.185	>24_GTG_HLIQY.44.185	>25_GTA_YTRQV.108.185	>26_GGT_ALKNM.41.185	>27_GGT_LTKDQ.160.185	>28_GGG_RSKER.257.185	>29_GGC_TLKNQ.184.185	>30_GGA_LAKDQ.140.185	>31_GCT_KITKF.71.185	>32_GCC_VRLKY.54.185	>33_GCA_ALRQQ.52.185	>34_GAT_RTMRY.38.185	>35_GAG_VMRWY.58.185	>36_GAC_ATRRF.65.185	>37_GAA_RFQKF.34.185	>38_CTA_LHYAK.63.185	>39_CTA_IFNAK.50.185	>40_CGG_STRER.29.185	>41_CGC_RVMSR.76.185	>42_CGA_TFYAA.25.185	>43_CCT_MTNGK.124.185	>44_CCT_RGDSK.77.185	>45_CCG_RCYEK.116.185	>46_CCC_RLDSK.36.185	>47_CCA_KMTQK.315.185	>48_CCA_EHNAK.211.185	>49_CAT_LSQSR.130.185	>51_CAG_MSHWR.89.185	>52_CAC_LGMRR.122.185
	NNGTTCTTAATTNN	NNCTAATTAACCNN	NNCGTATTATCTNN	NNGTGCTAATTANN	NNCTCATTAGCNN	NNTTAATTAAGCNN	NNCTTACTAATGNN	NNACCCATTAGTANN	NNCTCATTAATNN	NNCTCATTAACGNN	NNTCCATTAATTNN	NNAGGCTAATCCNN	NNGGCCAGATTGNN	NNCGGATTAGATNN	NNTGAATTAATANN	NNCTTATTAGCANN	NNGCATTAACANN	NNCGCATTAAACNN	NNCCGTCTAAACNN	NNCTAATTACACNN	NNTACTTAACGNN	NNACTTTAAGTGNN	NNTACTTGAGTANN	NNTCACCTTAATNN	NNCTTCCTTAATANN	NNTTGCTAAGGGNN	NNCGCCTCAAGANN	NNCTTCCTTACGNN	NNGCAGCTTAGTNN	NNAGGCTTAGTANN	NNCGCTCAAGTANN	NNTGTCTTAGCANN	NNCCTCTTAACTNN	NNCGTCTCCACANN	NNGCTGCTTAAGNN	NNGCTAGTTAATGNN	NNCCTCGTTATTNN	NNCTCCGTTAATTNN	NNCGCGTTATACNN	NNACTCGTTTAANN	NNACCGGTTAGANN	NNGCACGTTAAANN	NNCGGTTAGAGNN	NNGCGGGTTAGCANN	NNGTCCTAACTANN	NNAATGGTTATCNN	NNCCAGCTAACANN	NNCCTGTTTACGNN	NNTTGTGTCAATNN
	>1_TTT_RTVAA.68.186	>2_TTT_RTVSA.65.186	>4_TTC_VRVSA.66.186	>5_TTC_TRVAA.100.186	>6_TTA_VRVAA.125.186	>7_TTA_RVLRA.206.186	>8_TGT_RVVSQ.151.186	>9_TGG_KTTQD.84.186	>10_TGG_KSVMQ.71.186	>11_TGA_KSVAQ.115.186	>12_TGA_RGVAA.116.186	>13_TCT_ATVKA.166.186	>14_TCG_KGTQM.51.186	>15_TCC_RMIKS.75.186	>17_TAT_TRVSA.43.186	>18_TAG_RLTQA.85.186	>19_TAG_RMVSA.61.186	>20_TAC_QRVSA.64.186	>21_TAC_ERVSV.78.186	>22_TAA_RITAA.71.186	>23_GTT_GTRAY.126.186	>24_GTG_HLIQY.44.186	>25_GTA_YTRQV.107.186	>26_GGT_ALKNM.41.186	>27_GGT_LTKDQ.159.186	>28_GGG_RSKER.257.186	>29_GGC_TLKNQ.183.186	>30_GGA_LAKDQ.139.186	>31_GCT_KITKF.70.186	>32_GCC_VRLKY.54.186	>33_GCA_ALRQQ.51.186	>34_GAT_RTMRY.38.186	>35_GAG_VMRWY.57.186	>36_GAC_ATRRF.65.186	>37_GAA_RFQKF.34.186	>38_CTA_LHYAK.63.186	>39_CTA_IFNAK.48.186	>40_CGG_STRER.29.186	>41_CGC_RVMSR.75.186	>42_CGA_TFYAA.25.186	>43_CCT_MTNGK.124.186	>44_CCT_RGDSK.76.186	>45_CCG_RCYEK.115.186	>46_CCC_RLDSK.36.186	>47_CCA_KMTQK.312.186	>48_CCA_EHNAK.209.186	>49_CAT_LSQSR.130.186	>51_CAG_MSHWR.89.186	>52_CAC_LGMRR.120.186
	NNTAATTAACGNN	NNCTTATTAAGANN	NNCTTCTTAATANN	NNGTAATTAAGGNN	NNCCTTATTAATNN	NNGGCGTAATTANN	NNCACATTAGATNN	NNGTCCATTACCNN	NNGTCAATTAACNN	NNGCTCATTAGANN	NNTCGTTAATGANN	NNTAGCTAATCCNN	NNGTCCAGAGTGNN	NNATCGCTAATCNN	NNCGTATTATCTNN	NNCTAATTATCTNN	NNGTCACTAATTNN	NNCGTATTATACNN	NNGTGTATTAAANN	NNTAATTAAAGNN	NNAAGTTAAGTANN	NNGCCACTTCAANN	NNACTACTTAACNN	NNCACCTTAAAGNN	NNCCTCCTTAAAANN	NNCCCCTTAGTNN	NNCACCTTAATCNN	NNGCTCCTTAGANN	NNCCCCTTAAGCNN	NNGGACTAAGCCNN	NNCTCTAAGTANN	NNCATCTTAACGNN	NNACCTCTTCATNN	NNCGTCTTGATANN	NNCCTTCTTATCNN	NNCCTAGTTAACTNN	NNTCTCGTTAAANN	NNGACCGTTAAANN	NNACGCGTTAAANN	NNACTCGTTTGANN	NNTTGGTTAGTGNN	NNACTGGTTAAGNN	NNCCAGTTATGANN	NNCCGGGTTATTNN	NNCCACTAACTANN	NNCTAGTTAGAGNN	NNGCAGTTAACANN	NNTGTTAGTGANN	NNGTGTGTCTAANN
	>1_TTT_RTVAA.67.187	>2_TTT_RTVSA.65.187	>4_TTC_VRVSA.66.187	>5_TTC_TRVAA.99.187	>6_TTA_VRVAA.124.187	>7_TTA_RVLRA.206.187	>8_TGT_RVVSQ.150.187	>9_TGG_KTTQD.82.187	>10_TGG_KSVMQ.71.187	>11_TGA_KSVAQ.114.187	>12_TGA_RGVAA.116.187	>13_TCT_ATVKA.164.187	>14_TCG_KGTQM.50.187	>15_TCC_RMIKS.75.187	>17_TAT_TRVSA.43.187	>18_TAG_RLTQA.83.187	>19_TAG_RMVSA.61.187	>20_TAC_QRVSA.63.187	>21_TAC_ERVSV.78.187	>22_TAA_RITAA.70.187	>23_GTT_GTRAY.125.187	>24_GTG_HLIQY.44.187	>25_GTA_YTRQV.105.187	>26_GGT_ALKNM.41.187	>27_GGT_LTKDQ.158.187	>28_GGG_RSKER.256.187	>29_GGC_TLKNQ.182.187	>30_GGA_LAKDQ.139.187	>31_GCT_KITKF.70.187	>32_GCC_VRLKY.54.187	>33_GCA_ALRQQ.51.187	>34_GAT_RTMRY.38.187	>35_GAG_VMRWY.57.187	>36_GAC_ATRRF.65.187	>37_GAA_RFQKF.33.187	>38_CTA_LHYAK.62.187	>39_CTA_IFNAK.47.187	>40_CGG_STRER.29.187	>41_CGC_RVMSR.75.187	>42_CGA_TFYAA.25.187	>43_CCT_MTNGK.122.187	>44_CCT_RGDSK.76.187	>45_CCG_RCYEK.115.187	>46_CCC_RLDSK.36.187	>47_CCA_KMTQK.312.187	>48_CCA_EHNAK.206.187	>49_CAT_LSQSR.128.187	>51_CAG_MSHWR.88.187	>52_CAC_LGMRR.118.187
	NNTTTGCTAATTNN	NNTCTGCTAATGNN	NNTTTCAAGTCANN	NNCTCATTAGACNN	NNCTAATTACCTNN	NNCTAATTAAGANN	NNAACCTTAATGNN	NNCCCATTACGCNN	NNCTCATTAACGNN	NNTTAATTAAGTNN	NNGTTCATTAAGNN	NNGGGATTAGAGNN	NNCCAATTATAGNN	NNCGGATTAATCNN	NNAATGTTAATGNN	NNCCTAATTATANN	NNTCATTAAGTNN	NNCGTATTAGAGNN	NNCCGCATTAATGNN	NNCTCGTTAGGANN	NNTTTTAAGTANN	NNACCCTAAGTANN	NNCCCCTAAGTANN	NNTGCGCCTTAAGNN	NNCTTCCTTAGANN	NNTTCCCTTAAGNN	NNACGCCTTATCNN	NNTCCTTACTANN	NNTTGTTAAGCCNN	NNTGACTTAAGCNN	NNTATCTAAGTANN	NNCATCTTAAAGNN	NNCCCTCTCTACNN	NNCGTCTCATTANN	NNGCTTTAAGAANN	NNGCTGGTTAGGNN	NNGCTAGTTTAGNN	NNCCCGTTAAGTNN	NNGCGTTAAGCNN	NNACTCGTTAGAGNN	NNGCAAGTTAAANN	NNATGTGCCGANN	NNCCAGTTAATGNN	NNGTCCAGATNGNN	NNCCTAGTTATANN	NNTGGTTAACCANN	NNTTTCGTAACANN	NNTGTTAGCGTNN	NNGTGTGTTTTGNN
	>1_TTT_RTVAA.67.188	>2_TTT_RTVSA.65.188	>4_TTC_VRVSA.65.188	>5_TTC_TRVAA.97.188	>6_TTA_VRVAA.124.188	>7_TTA_RVLRA.206.188	>8_TGT_RVVSQ.149.188	>9_TGG_KTTQD.81.188	>10_TGG_KSVMQ.71.188	>11_TGA_KSVAQ.113.188	>12_TGA_RGVAA.113.188	>13_TCT_ATVKA.161.188	>14_TCG_KGTQM.50.188	>15_TCC_RMIKS.74.188	>17_TAT_TRVSA.43.188	>18_TAG_RLTQA.82.188	>19_TAG_RMVSA.61.188	>20_TAC_QRVSA.63.188	>21_TAC_ERVSV.77.188	>22_TAA_RITAA.70.188	>23_GTT_GTRAY.125.188	>24_GTG_HLIQY.43.188	>25_GTA_YTRQV.104.188	>26_GGT_ALKNM.41.188	>27_GGT_LTKDQ.156.188	>28_GGG_RSKER.254.188	>29_GGC_TLKNQ.181.188	>30_GGA_LAKDQ.137.188	>31_GCT_KITKF.69.188	>32_GCC_VRLKY.54.188	>33_GCA_ALRQQ.50.188	>34_GAT_RTMRY.38.188	>35_GAG_VMRWY.56.188	>36_GAC_ATRRF.65.188	>37_GAA_RFQKF.33.188	>38_CTA_LHYAK.62.188	>39_CTA_IFNAK.47.188	>40_CGG_STRER.28.188	>41_CGC_RVMSR.74.188	>42_CGA_TFYAA.24.188	>43_CCT_MTNGK.122.188	>44_CCT_RGDSK.76.188	>45_CCG_RCYEK.113.188	>46_CCC_RLDSK.36.188	>47_CCA_KMTQK.310.188	>48_CCA_EHNAK.205.188	>49_CAT_LSQSR.128.188	>51_CAG_MSHWR.88.188	>52_CAC_LGMRR.118.188
	NNCCTAATTATGNN	NNTTTGCTAATGNN	NNTACGTTAATANN	NNAAGCTAATTANN	NNCCTAATTAATNN	NNATGCTAATTANN	NNTGTCCTAATGNN	NNACCCATTATGNN	NNCCATTACGTNN	NNCTCATTACAGNN	NNTTAATTAGAGNN	NNGCGGATTAATGNN	NNATCCATTAACNN	NNAGGCTTAATCNN	NNGCTGCTAATGNN	NNGCTCGTTAAANN	NNGTCGCTAATANN	NNCGTATTACCGNN	NNTCGTATTAAANN	NNTTAATTAAGANN	NNAACGTAAGTANN	NNGTATTAAGTGNN	NNCCTACTTATCNN	NNTAGTTAATTANN	NNTCCTTAACANN	NNACCCTTAAGGNN	NNTCGCCTTAGCGNN	NNGATTTAAGGANN	NNAAGCTTAAGCNN	NNCGGCTTAATANN	NNGTCATAAGTANN	NNTTAGTTAAGANN	NNCTCTTAACTNN	NNCGTCTTCGANN	NNGGTTCTTAATANN	NNTAGTTAACCNN	NNCTAGTTATGNN	NNTCCGTTAGANN	NNCGTGTTTAAANN	NNCTCGTTACGCNN	NNAAGTTAACANN	NNGGGTTAGAGNN	NNCCGGTTAAGCNN	NNGTCCAGACTGNN	NNGCACTGACGANN	NNGCTGGTTTCANN	NNGAGACTAACANN	NNCCTGTTACCCNN	NNATGTGTTAAANN
	>1_TTT_RTVAA.66.189	>2_TTT_RTVSA.65.189	>4_TTC_VRVSA.65.189	>5_TTC_TRVAA.97.189	>6_TTA_VRVAA.123.189	>7_TTA_RVLRA.204.189	>8_TGT_RVVSQ.149.189	>9_TGG_KTTQD.81.189	>10_TGG_KSVMQ.70.189	>11_TGA_KSVAQ.112.189	>12_TGA_RGVAA.112.189	>13_TCT_ATVKA.161.189	>14_TCG_KGTQM.50.189	>15_TCC_RMIKS.74.189	>17_TAT_TRVSA.43.189	>18_TAG_RLTQA.81.189	>19_TAG_RMVSA.61.189	>20_TAC_QRVSA.62.189	>21_TAC_ERVSV.77.189	>22_TAA_RITAA.69.189	>23_GTT_GTRAY.124.189	>24_GTG_HLIQY.43.189	>25_GTA_YTRQV.103.189	>26_GGT_ALKNM.40.189	>27_GGT_LTKDQ.155.189	>28_GGG_RSKER.251.189	>29_GGC_TLKNQ.179.189	>30_GGA_LAKDQ.137.189	>31_GCT_KITKF.68.189	>32_GCC_VRLKY.54.189	>33_GCA_ALRQQ.49.189	>34_GAT_RTMRY.38.189	>35_GAG_VMRWY.56.189	>36_GAC_ATRRF.63.189	>37_GAA_RFQKF.33.189	>38_CTA_LHYAK.62.189	>39_CTA_IFNAK.47.189	>40_CGG_STRER.28.189	>41_CGC_RVMSR.74.189	>42_CGA_TFYAA.24.189	>43_CCT_MTNGK.121.189	>44_CCT_RGDSK.75.189	>45_CCG_RCYEK.113.189	>46_CCC_RLDSK.36.189	>47_CCA_KMTQK.310.189	>48_CCA_EHNAK.204.189	>49_CAT_LSQSR.127.189	>51_CAG_MSHWR.87.189	>52_CAC_LGMRR.117.189
	NNCCTCTTAATTNN	NNCTTGTTAATTNN	NNTCTCTTAATANN	NNTAATTAACGNN	NNCCTAATTTAANN	NNGTTTTAATTANN	NNCCTGTTAATGNN	NNACCCATTAATGNN	NNTACATTAACANN	NNCTCATAATGANN	NNTATTTAATTANN	NNGGATTTGGANN	NNTTTACGTCTCNN	NNGGGGATTTAANN	NNGCGCTTAATGNN	NNGTCAATTATGNN	NNTAATTAGTANN	NNCGCGTTAATANN	NNCGTATTAGCANN	NNCCTAATTAGCANN	NNCTACTTATGTNN	NNTATCTAAGTGNN	NNGAACTAAGTANN	NNCGCCTTAGGTNN	NNCTCCTTTGAANN	NNTTATTAAGGGNN	NNGCCTTAGAGNN	NNCCACTAAGGANN	NNCATCTTAAGANN	NNTTGTTAAGACNN	NNCTACTTAGATNN	NNCGTCTTACGTNN	NNGCCTCTCATCNN	NNGCGTCTTAGTNN	NNGTCCAGATTTNN	NNGCTAGTTAACANN	NNCTAGTTAATANN	NNCCCCGTTAACANN	NNCGCGTTAACCNN	NNTGTCGTTAATNN	NNTCTAGTTAACNN	NNCGGGTTATATNN	NNGCCAGTTACGNN	NNATCAGTCCTGNN	NNTCCGTAACCANN	NNCTAGTTAACNN	NNCGTGTTAAACNN	NNTCCTGTTACGNN	NNATGTGTCAAANN
	>1_TTT_RTVAA.66.190	>2_TTT_RTVSA.65.190	>4_TTC_VRVSA.64.190	>5_TTC_TRVAA.97.190	>6_TTA_VRVAA.122.190	>7_TTA_RVLRA.203.190	>8_TGT_RVVSQ.149.190	>9_TGG_KTTQD.80.190	>10_TGG_KSVMQ.70.190	>11_TGA_KSVAQ.111.190	>12_TGA_RGVAA.111.190	>13_TCT_ATVKA.158.190	>14_TCG_KGTQM.50.190	>15_TCC_RMIKS.73.190	>17_TAT_TRVSA.43.190	>18_TAG_RLTQA.80.190	>19_TAG_RMVSA.60.190	>20_TAC_QRVSA.62.190	>21_TAC_ERVSV.77.190	>22_TAA_RITAA.69.190	>23_GTT_GTRAY.124.190	>24_GTG_HLIQY.43.190	>25_GTA_YTRQV.102.190	>26_GGT_ALKNM.39.190	>27_GGT_LTKDQ.155.190	>28_GGG_RSKER.249.190	>29_GGC_TLKNQ.176.190	>30_GGA_LAKDQ.135.190	>31_GCT_KITKF.67.190	>32_GCC_VRLKY.54.190	>33_GCA_ALRQQ.49.190	>34_GAT_RTMRY.38.190	>35_GAG_VMRWY.56.190	>36_GAC_ATRRF.62.190	>37_GAA_RFQKF.33.190	>38_CTA_LHYAK.61.190	>39_CTA_IFNAK.47.190	>40_CGG_STRER.28.190	>41_CGC_RVMSR.73.190	>42_CGA_TFYAA.24.190	>43_CCT_MTNGK.120.190	>44_CCT_RGDSK.73.190	>45_CCG_RCYEK.113.190	>46_CCC_RLDSK.35.190	>47_CCA_KMTQK.310.190	>48_CCA_EHNAK.204.190	>49_CAT_LSQSR.127.190	>51_CAG_MSHWR.86.190	>52_CAC_LGMRR.117.190
	NNTCTAATTAGANN	NNCAAATTAGCGNN	NNATCACTAATTNN	NNGTTAATTAACNN	NNACTAATTAACNN	NNGGCTTAATGANN	NNGCTCCTAATGNN	NNTCCTGACAGGNN	NNACTCATTAACNN	NNCTAATTAATNN	NNTACATAATGGNN	NNCTGGATTATCNN	NNCCATTAGAANN	NNAAGGATTAACNN	NNCCGCATTAGCANN	NNCCTAATTATCNN	NNTCCCTTAATGNN	NNGCGCTTAATANN	NNGCGCATTAGANN	NNCTAATTAAATNN	NNCGACTAAGTANN	NNTTCCTAAGTANN	NNTGCTCAAGTANN	NNCCGCCTTATCNN	NNGAGTTAAGGANN	NNGCCCCTTAGCNN	NNCCACCTTAGANN	NNTCCTTACAANN	NNCCGTCTTAACNN	NNGGTCTTAAGCNN	NNGTCCCAAGTANN	NNTGTACTAAGANN	NNGCCTCTTGAGNN	NNCCGTCTTAGGANN	NNGGTTCTTTGCNN	NNTAGTTAAAANN	NNGATAGTTAGANN	NNTTCCGTTATCNN	NNGTCATTAACANN	NNGCTTGTTAGTNN	NNCTGGTTACACNN	NNCGGGTTACTANN	NNTTCGGTTAGANN	NNCCGGGTTAGTANN	NNCGATTAACCANN	NNGCTGGTTTATNN	NNAAAATTAACANN	NNCCCTGTTAAGANN	NNTGTGTTAAGNN
	>1_TTT_RTVAA.65.191	>2_TTT_RTVSA.64.191	>4_TTC_VRVSA.64.191	>5_TTC_TRVAA.96.191	>6_TTA_VRVAA.122.191	>7_TTA_RVLRA.202.191	>8_TGT_RVVSQ.148.191	>9_TGG_KTTQD.79.191	>10_TGG_KSVMQ.69.191	>11_TGA_KSVAQ.110.191	>12_TGA_RGVAA.111.191	>13_TCT_ATVKA.158.191	>14_TCG_KGTQM.50.191	>15_TCC_RMIKS.72.191	>17_TAT_TRVSA.43.191	>18_TAG_RLTQA.80.191	>19_TAG_RMVSA.60.191	>20_TAC_QRVSA.62.191	>21_TAC_ERVSV.76.191	>22_TAA_RITAA.67.191	>23_GTT_GTRAY.124.191	>24_GTG_HLIQY.42.191	>25_GTA_YTRQV.100.191	>26_GGT_ALKNM.38.191	>27_GGT_LTKDQ.154.191	>28_GGG_RSKER.249.191	>29_GGC_TLKNQ.175.191	>30_GGA_LAKDQ.135.191	>31_GCT_KITKF.67.191	>32_GCC_VRLKY.53.191	>33_GCA_ALRQQ.48.191	>34_GAT_RTMRY.38.191	>35_GAG_VMRWY.56.191	>36_GAC_ATRRF.61.191	>37_GAA_RFQKF.33.191	>38_CTA_LHYAK.60.191	>39_CTA_IFNAK.46.191	>40_CGG_STRER.27.191	>41_CGC_RVMSR.73.191	>42_CGA_TFYAA.23.191	>43_CCT_MTNGK.120.191	>44_CCT_RGDSK.73.191	>45_CCG_RCYEK.112.191	>46_CCC_RLDSK.35.191	>47_CCA_KMTQK.310.191	>48_CCA_EHNAK.204.191	>49_CAT_LSQSR.125.191	>51_CAG_MSHWR.84.191	>52_CAC_LGMRR.116.191
	NNTCTTTAATTANN	NNACATTAACANN	NNGCATTAACANN	NNCTAATTAACNN	NNTCCTGACAGTNN	NNAACTAATTANN	NNTCTGATAATGNN	NNCCCCATTAGGNN	NNGCGTTAATGANN	NNGCTCATTAATNN	NNGCTCATTAACNN	NNCCACTAATCCNN	NNTTCCAGATTGNN	NNAGGATTAGGGNN	NNCCGTGTTAGGNN	NNCCAATTACGTNN	NNTTATGAAATANN	NNTGTATTAAGANN	NNGCGTATTACCNN	NNCGACTAATTANN	NNATCTAAGTANN	NNACTCTAAGTANN	NNATCGTAAGTANN	NNGCACCTTAACANN	NNCTCCTTATCCNN	NNCCCACTTAAGNN	NNCCGCCTTAGCNN	NNTTCCTTTATANN	NNCGGCTTAAANN	NNACCTTAAGACNN	NNTTCTAAGTANN	NNCGTCTTCACANN	NNGCCTCTCAGGNN	NNGCGTCTCAGTNN	NNTCCTTAAGAANN	NNTCTAGTTACANN	NNTCTCGTTATANN	NNACCCGTTATGNN	NNCAATTTAACANN	NNACTCGTTAAACNN	NNCAGGTTAGTGNN	NNTGGGTTAAGANN	NNCCGGTTATGCNN	NNCGGGTTAGGNN	NNCTAGTTAGAGNN	NNTCACTAACTANN	NNATGTTAAGTNN	NNTGCCTGTCAGCNN	NNGCGTGCTAATNN
	>1_TTT_RTVAA.65.192	>2_TTT_RTVSA.64.192	>4_TTC_VRVSA.64.192	>5_TTC_TRVAA.95.192	>6_TTA_VRVAA.118.192	>7_TTA_RVLRA.202.192	>8_TGT_RVVSQ.148.192	>9_TGG_KTTQD.79.192	>10_TGG_KSVMQ.69.192	>11_TGA_KSVAQ.110.192	>12_TGA_RGVAA.110.192	>13_TCT_ATVKA.157.192	>14_TCG_KGTQM.50.192	>15_TCC_RMIKS.72.192	>17_TAT_TRVSA.42.192	>18_TAG_RLTQA.80.192	>19_TAG_RMVSA.59.192	>20_TAC_QRVSA.62.192	>21_TAC_ERVSV.76.192	>22_TAA_RITAA.67.192	>23_GTT_GTRAY.124.192	>24_GTG_HLIQY.42.192	>25_GTA_YTRQV.98.192	>26_GGT_ALKNM.38.192	>27_GGT_LTKDQ.153.192	>28_GGG_RSKER.247.192	>29_GGC_TLKNQ.174.192	>30_GGA_LAKDQ.135.192	>31_GCT_KITKF.67.192	>32_GCC_VRLKY.53.192	>33_GCA_ALRQQ.48.192	>34_GAT_RTMRY.37.192	>35_GAG_VMRWY.56.192	>36_GAC_ATRRF.61.192	>37_GAA_RFQKF.32.192	>38_CTA_LHYAK.60.192	>39_CTA_IFNAK.46.192	>40_CGG_STRER.27.192	>41_CGC_RVMSR.73.192	>42_CGA_TFYAA.23.192	>43_CCT_MTNGK.120.192	>44_CCT_RGDSK.72.192	>45_CCG_RCYEK.112.192	>46_CCC_RLDSK.35.192	>47_CCA_KMTQK.305.192	>48_CCA_EHNAK.203.192	>49_CAT_LSQSR.125.192	>51_CAG_MSHWR.83.192	>52_CAC_LGMRR.112.192
	NNTAATTATGANN	NNCGACTTAATGNN	NNTTAGTTAATANN	NNCCGTGTTAGTNN	NNCTCATTACTTNN	NNTAAGTAATTANN	NNTGCCCTAATGNN	NNCATTGTACTANN	NNTTCATTATCANN	NNTTAATTAGTCNN	NNGTTCATTAAANN	NNGTCTTAATCCNN	NNCCCATTAGCANN	NNAGGGATTATANN	NNTCGTATTATCNN	NNGCTCGTTAGANN	NNTGTCTTAATGNN	NNCCGTATTAGTGNN	NNCGCATTAAAANN	NNCTCATTAAGNN	NNGCTCCAAGTANN	NNTGGCTAAGTGNN	NNTGCTTAAGTANN	NNCGCCTTAGTNN	NNGTTCCTTAAANN	NNCCCCTCAGAANN	NNGCGCCTTTGGNN	NNTTATTAAGGANN	NNCGGCTTAACNN	NNTAGTTAAGCCNN	NNGCTGTAAGTANN	NNCTTCTTAAAGNN	NNCCTCTTAGANN	NNTCGTCTTAAANN	NNCCTTCTTAGTNN	NNGGTAGTTATANN	NNGGTAGTTAAGANN	NNTCCGTTACTANN	NNCTGCTTAACANN	NNCCTCGTTAGAGNN	NNAATGGTTAATNN	NNGCTGGTTATGNN	NNTCCTGACAGGNN	NNGTCNAGATTGNN	NNCTAGTTACGANN	NNAGCTAGTTAGNN	NNTCATGTTACANN	NNCTGTTAGCGNN	NNGTGTTAGCGNN
	>1_TTT_RTVAA.65.193	>2_TTT_RTVSA.64.193	>4_TTC_VRVSA.64.193	>5_TTC_TRVAA.95.193	>6_TTA_VRVAA.117.193	>7_TTA_RVLRA.202.193	>8_TGT_RVVSQ.148.193	>9_TGG_KTTQD.79.193	>10_TGG_KSVMQ.69.193	>11_TGA_KSVAQ.104.193	>12_TGA_RGVAA.109.193	>13_TCT_ATVKA.157.193	>14_TCG_KGTQM.49.193	>15_TCC_RMIKS.71.193	>17_TAT_TRVSA.42.193	>18_TAG_RLTQA.79.193	>19_TAG_RMVSA.59.193	>20_TAC_QRVSA.61.193	>21_TAC_ERVSV.76.193	>22_TAA_RITAA.67.193	>23_GTT_GTRAY.122.193	>24_GTG_HLIQY.41.193	>25_GTA_YTRQV.98.193	>26_GGT_ALKNM.37.193	>27_GGT_LTKDQ.153.193	>28_GGG_RSKER.247.193	>29_GGC_TLKNQ.168.193	>30_GGA_LAKDQ.135.193	>31_GCT_KITKF.66.193	>32_GCC_VRLKY.53.193	>33_GCA_ALRQQ.47.193	>34_GAT_RTMRY.36.193	>35_GAG_VMRWY.55.193	>36_GAC_ATRRF.61.193	>37_GAA_RFQKF.32.193	>38_CTA_LHYAK.60.193	>39_CTA_IFNAK.45.193	>40_CGG_STRER.27.193	>41_CGC_RVMSR.72.193	>42_CGA_TFYAA.23.193	>43_CCT_MTNGK.119.193	>44_CCT_RGDSK.71.193	>45_CCG_RCYEK.109.193	>46_CCC_RLDSK.35.193	>47_CCA_KMTQK.305.193	>48_CCA_EHNAK.203.193	>49_CAT_LSQSR.122.193	>51_CAG_MSHWR.83.193	>52_CAC_LGMRR.112.193
	NNGTGCTAATTANN	NNACTCTTAATGNN	NNGTGCATTAAGNN	NNTGCGTAATTANN	NNACTAATTAATNN	NNCTCGTAATTANN	NNCACATTATCANN	NNGTCCATTATTNN	NNCCTCATTAAANN	NNCTTCATTAACNN	NNATTCATTATGNN	NNTGGATTACGANN	NNTCCATTAAGANN	NNCGGCTAATCCNN	NNAGTGCTAATGNN	NNGTCAATTAGANN	NNTGATTCAAGNN	NNCGTATTAGCTNN	NNCGCATTACTGNN	NNCCTAATTATGANN	NNTTGTTAAGTANN	NNCCACTTAATCNN	NNTACTTAAAANN	NNTTCCAGATTGNN	NNTTCCTTAAGGANN	NNACCCCTTAATGNN	NNCACCTTAAANN	NNCTTCCTTAGCNN	NNCGGCTTATCTNN	NNGTTCTAAGCCNN	NNCTACTTAGCCNN	NNCATCTTAGCANN	NNCCTCTCACTANN	NNCGTCTTTAANN	NNGCTTCTTAAGANN	NNGCTAGTTAAGGNN	NNGGTCGTTAAGNN	NNGCCCGTCTAANN	NNGCTATTAACANN	NNTCGTTAGGGNN	NNCTAGGTTAACNN	NNACAGGTTAATNN	NNGGTAAAGCATNN	NNCCGGGTTACTNN	NNTACTTAACTANN	NNTACTTAACTANN	NNATTTTAACANN	NNTCCTGTTTATNN	NNTGTGTTACANN
	>1_TTT_RTVAA.64.194	>2_TTT_RTVSA.64.194	>4_TTC_VRVSA.63.194	>5_TTC_TRVAA.94.194	>6_TTA_VRVAA.117.194	>7_TTA_RVLRA.201.194	>8_TGT_RVVSQ.145.194	>9_TGG_KTTQD.77.194	>10_TGG_KSVMQ.69.194	>11_TGA_KSVAQ.104.194	>12_TGA_RGVAA.107.194	>13_TCT_ATVKA.155.194	>14_TCG_KGTQM.49.194	>15_TCC_RMIKS.71.194	>17_TAT_TRVSA.42.194	>18_TAG_RLTQA.79.194	>19_TAG_RMVSA.59.194	>20_TAC_QRVSA.61.194	>21_TAC_ERVSV.75.194	>22_TAA_RITAA.66.194	>23_GTT_GTRAY.122.194	>24_GTG_HLIQY.41.194	>25_GTA_YTRQV.97.194	>26_GGT_ALKNM.37.194	>27_GGT_LTKDQ.152.194	>28_GGG_RSKER.247.194	>29_GGC_TLKNQ.167.194	>30_GGA_LAKDQ.135.194	>31_GCT_KITKF.66.194	>32_GCC_VRLKY.52.194	>33_GCA_ALRQQ.47.194	>34_GAT_RTMRY.36.194	>35_GAG_VMRWY.55.194	>36_GAC_ATRRF.61.194	>37_GAA_RFQKF.31.194	>38_CTA_LHYAK.59.194	>39_CTA_IFNAK.45.194	>40_CGG_STRER.27.194	>41_CGC_RVMSR.72.194	>42_CGA_TFYAA.23.194	>43_CCT_MTNGK.118.194	>44_CCT_RGDSK.70.194	>45_CCG_RCYEK.109.194	>46_CCC_RLDSK.35.194	>47_CCA_KMTQK.303.194	>48_CCA_EHNAK.201.194	>49_CAT_LSQSR.122.194	>51_CAG_MSHWR.82.194	>52_CAC_LGMRR.112.194
	NNCTCATTAGGANN	NNCTTATTAATTNN	NNGCATATTAAGNN	NNTAATTAGTANN	NNCTCATTATGGNN	NNAGACTAATTANN	NNGGACATAATGNN	NNACCCATTTAGNN	NNACCTTAATGANN	NNCTTCATTATGNN	NNTTCATTAAANN	NNCCTTAATCCNN	NNGTCCCGATTGNN	NNGGGATTAATCNN	NNTCGTATTAGTNN	NNCCTCATTAAANN	NNTCCGCTAATGNN	NNCTCATTAAGANN	NNCCGCATTATGNN	NNCTAATTACGTNN	NNCTACTTAGAGNN	NNCCACTTACGTNN	NNTCTATAAGTANN	NNGCCTTAAGCNN	NNCCTCCTTACANN	NNCCACTTAAGTNN	NNACACCTTAAGNN	NNTTCCTTAGGNN	NNCTTCTTATGGNN	NNTCGCTAAGCCNN	NNGTACTAGCTTNN	NNTGTCTTAGCGNN	NNCCTCTTCACCNN	NNTCGTCTCATGNN	NNTGTTCTTACANN	NNACTAGTTAGCNN	NNACTCGTTAACCNN	NNTCCCGTTATGNN	NNGTGGTTAACANN	NNCCTCGTTATTGNN	NNGAAGTCAGGGNN	NNTGTACATGACNN	NNACCAGTTAAGNN	NNGCACGTTAACNN	NNCTGGTTAGTGNN	NNTAGTTAACTNN	NNTCTTTTAACANN	NNCCTGTTAGGTNN	NNCGTGTTAGCNN
	>1_TTT_RTVAA.64.195	>2_TTT_RTVSA.64.195	>4_TTC_VRVSA.63.195	>5_TTC_TRVAA.94.195	>6_TTA_VRVAA.114.195	>7_TTA_RVLRA.199.195	>8_TGT_RVVSQ.145.195	>9_TGG_KTTQD.77.195	>10_TGG_KSVMQ.68.195	>11_TGA_KSVAQ.102.195	>12_TGA_RGVAA.105.195	>13_TCT_ATVKA.154.195	>14_TCG_KGTQM.49.195	>15_TCC_RMIKS.71.195	>17_TAT_TRVSA.42.195	>18_TAG_RLTQA.77.195	>19_TAG_RMVSA.59.195	>20_TAC_QRVSA.61.195	>21_TAC_ERVSV.74.195	>22_TAA_RITAA.66.195	>23_GTT_GTRAY.121.195	>24_GTG_HLIQY.41.195	>25_GTA_YTRQV.97.195	>26_GGT_ALKNM.37.195	>27_GGT_LTKDQ.151.195	>28_GGG_RSKER.243.195	>29_GGC_TLKNQ.165.195	>30_GGA_LAKDQ.134.195	>31_GCT_KITKF.65.195	>32_GCC_VRLKY.52.195	>33_GCA_ALRQQ.47.195	>34_GAT_RTMRY.36.195	>35_GAG_VMRWY.55.195	>36_GAC_ATRRF.60.195	>37_GAA_RFQKF.31.195	>38_CTA_LHYAK.59.195	>39_CTA_IFNAK.44.195	>40_CGG_STRER.27.195	>41_CGC_RVMSR.72.195	>42_CGA_TFYAA.23.195	>43_CCT_MTNGK.117.195	>44_CCT_RGDSK.70.195	>45_CCG_RCYEK.108.195	>46_CCC_RLDSK.35.195	>47_CCA_KMTQK.300.195	>48_CCA_EHNAK.200.195	>49_CAT_LSQSR.122.195	>51_CAG_MSHWR.81.195	>52_CAC_LGMRR.112.195
	NNTTCATTAATGNN	NNGTTCCTAATANN	NNAGCCTTAATANN	NNCTTCGTAATTNN	NNCCTCATTAGTGNN	NNCCTAATTAGGNN	NNCCTCATTATGNN	NNCCCCATTAGTNN	NNGTCCAGATGGNN	NNTTCATTAAGCNN	NNTCCATTAAGGNN	NNTCGGATTATANN	NNTCCATTATCANN	NNGTGGATTAATNN	NNTGTACTAATGNN	NNGTCAATTAAGNN	NNTTTGTTAATANN	NNCCGTATTATANN	NNCGTATTTATANN	NNCTAATTACCGNN	NNCTACTTAAAANN	NNTTATTAAGTGNN	NNCTACTTATAGNN	NNGTCCCGATTGNN	NNTTCCTTACGANN	NNCCCCTCAATNN	NNCACCTTAAAGNN	NNCTCCTTTAAGNN	NNGCAGCTTATGNN	NNTGGCTTAAGCCNN	NNGCCCTAAGTANN	NNCATCTTAGCGNN	NNCCTCTTTATGNN	NNCGTCTTCGGANN	NNCTTCTAAGAANN	NNCTGGTTAGTANN	NNCTAGTTAATCNN	NNTCCGTTAGAGNN	NNGGTGTTAACANN	NNCTCGTTATATNN	NNGCAAGTTACANN	NNACGGGTTTAANN	NNACTGGTTAGTNN	NNCGCGCATCGANN	NNGGTAGTTAAGNN	NNTCTAGTTATANN	NNAAGTTAACANN	NNCCTGTTTGTANN	NNCGTGTTAATANN
	>1_TTT_RTVAA.63.196	>2_TTT_RTVSA.63.196	>4_TTC_VRVSA.63.196	>5_TTC_TRVAA.94.196	>6_TTA_VRVAA.113.196	>7_TTA_RVLRA.199.196	>8_TGT_RVVSQ.145.196	>9_TGG_KTTQD.75.196	>10_TGG_KSVMQ.68.196	>11_TGA_KSVAQ.101.196	>12_TGA_RGVAA.105.196	>13_TCT_ATVKA.153.196	>14_TCG_KGTQM.48.196	>15_TCC_RMIKS.69.196	>17_TAT_TRVSA.42.196	>18_TAG_RLTQA.75.196	>19_TAG_RMVSA.59.196	>20_TAC_QRVSA.60.196	>21_TAC_ERVSV.74.196	>22_TAA_RITAA.66.196	>23_GTT_GTRAY.121.196	>24_GTG_HLIQY.41.196	>25_GTA_YTRQV.97.196	>26_GGT_ALKNM.37.196	>27_GGT_LTKDQ.151.196	>28_GGG_RSKER.242.196	>29_GGC_TLKNQ.165.196	>30_GGA_LAKDQ.134.196	>31_GCT_KITKF.65.196	>32_GCC_VRLKY.52.196	>33_GCA_ALRQQ.46.196	>34_GAT_RTMRY.36.196	>35_GAG_VMRWY.55.196	>36_GAC_ATRRF.60.196	>37_GAA_RFQKF.31.196	>38_CTA_LHYAK.58.196	>39_CTA_IFNAK.44.196	>40_CGG_STRER.27.196	>41_CGC_RVMSR.71.196	>42_CGA_TFYAA.23.196	>43_CCT_MTNGK.117.196	>44_CCT_RGDSK.69.196	>45_CCG_RCYEK.108.196	>46_CCC_RLDSK.33.196	>47_CCA_KMTQK.299.196	>48_CCA_EHNAK.200.196	>49_CAT_LSQSR.121.196	>51_CAG_MSHWR.81.196	>52_CAC_LGMRR.111.196
	NNTAATTACGANN	NNGCCCAGATTGNN	NNAGCTTAATTANN	NNATCCTAATTANN	NNGATGCTAAACNN	NNCCAGTAATTANN	NNAGCATTAATGNN	NNGCCCATTATGCNN	NNTCCTTAATGANN	NNTCATTAGACNN	NNATGCTATCTTNN	NNAGGATTAGGGNN	NNCCCCATTAAGANN	NNTCCGCTAATCNN	NNCCCATTAATANN	NNCCAATTATACNN	NNGTACTTAATGNN	NNCCGCATTAGTGNN	NNTTGTATTAAGNN	NNCTATTAATTANN	NNCGATTAAGTANN	NNCCCACTTACAANN	NNAAACTAAGTANN	NNACGCCTCAAANN	NNACTCCTTATANN	NNCCCACTTAATNN	NNCCGCCTTAATGNN	NNCACTAAGGANN	NNCGCTAAGCCNN	NNTAACTAAGCCNN	NNACTACTTAAANN	NNGTCTTAAAGNN	NNGCCTCTCCGANN	NNCCGTCTTAGAGNN	NNTGGTTAAGCCNN	NNCCTAGTTAATCNN	NNCTCGTTAAGNN	NNATACGAAGAGNN	NNTTGCCTGACANN	NNACAAATACTANN	NNAGTGGTTAACNN	NNGCGGGTTAATANN	NNCCGGTTAAGNN	NNGCTGGTTAAGNN	NNAGGTTAACTANN	NNCTAGTTAAGNN	NNGTCCTAACAANN	NNCCCTGTTAAANN	NNCGTGTCAACANN
	>1_TTT_RTVAA.63.197	>2_TTT_RTVSA.63.197	>4_TTC_VRVSA.63.197	>5_TTC_TRVAA.91.197	>6_TTA_VRVAA.112.197	>7_TTA_RVLRA.198.197	>8_TGT_RVVSQ.145.197	>9_TGG_KTTQD.75.197	>10_TGG_KSVMQ.68.197	>11_TGA_KSVAQ.101.197	>12_TGA_RGVAA.104.197	>13_TCT_ATVKA.152.197	>14_TCG_KGTQM.48.197	>15_TCC_RMIKS.68.197	>17_TAT_TRVSA.42.197	>18_TAG_RLTQA.75.197	>19_TAG_RMVSA.59.197	>20_TAC_QRVSA.60.197	>21_TAC_ERVSV.74.197	>22_TAA_RITAA.65.197	>23_GTT_GTRAY.120.197	>24_GTG_HLIQY.40.197	>25_GTA_YTRQV.95.197	>26_GGT_ALKNM.36.197	>27_GGT_LTKDQ.150.197	>28_GGG_RSKER.238.197	>29_GGC_TLKNQ.162.197	>30_GGA_LAKDQ.134.197	>31_GCT_KITKF.65.197	>32_GCC_VRLKY.51.197	>33_GCA_ALRQQ.46.197	>34_GAT_RTMRY.35.197	>35_GAG_VMRWY.55.197	>36_GAC_ATRRF.59.197	>37_GAA_RFQKF.31.197	>38_CTA_LHYAK.56.197	>39_CTA_IFNAK.43.197	>40_CGG_STRER.26.197	>41_CGC_RVMSR.71.197	>42_CGA_TFYAA.23.197	>43_CCT_MTNGK.117.197	>44_CCT_RGDSK.69.197	>45_CCG_RCYEK.107.197	>46_CCC_RLDSK.33.197	>47_CCA_KMTQK.296.197	>48_CCA_EHNAK.199.197	>49_CAT_LSQSR.120.197	>51_CAG_MSHWR.81.197	>52_CAC_LGMRR.111.197
	NNTAATTATGTNN	NNACTACTAATGNN	NNCGTATTAGATNN	NNCTCATTAATTNN	NNTATACACGAANN	NNGAGTTAATGANN	NNCGCTTTAATGNN	NNGCCATTAGTGNN	NNCCAATTAGCANN	NNTTCATTAATCNN	NNGTTAATTAAGNN	NNCCGGATTAGTNN	NNCCCATTAGANN	NNCGGATTAGAGNN	NNCGTATTACCANN	NNCCCATTAATANN	NNCACATTAAGTNN	NNGCGCATTAGTNN	NNTGTATTATCANN	NNAGGTTAATTANN	NNCGTTAAGTANN	NNCCCACTTTACNN	NNATAGTAAGTANN	NNGCACCTTTAANN	NNCCTCCTTAAGANN	NNCCCCTCAGCCNN	NNGCACCTTATGNN	NNGCTCCTTAGGNN	NNAACTTAAGCCNN	NNGGCTTAAGACNN	NNTTTATAAGTANN	NNGTCTTAAGCNN	NNCCCTCTTCATNN	NNCGTCTTTAGCNN	NNAACTACTTAACNN	NNCCTAGTTAGACNN	NNACTAGTTAAGGNN	NNTTCCGTTAATTNN	NNTTTGCTAACANN	NNGCTCGTTAAACNN	NNCCTGGTTAACNN	NNCGGGTTACAGNN	NNGCTGGTTAAANN	NNTATACACGAANN	NNGTACTAACCANN	NNAGATTGACTANN	NNTCGTGTTATCNN	NNCCTGTCAAGCNN	NNTGTGTTAGCCNN
	>1_TTT_RTVAA.62.198	>2_TTT_RTVSA.63.198	>4_TTC_VRVSA.63.198	>5_TTC_TRVAA.90.198	>6_TTA_VRVAA.109.198	>7_TTA_RVLRA.198.198	>8_TGT_RVVSQ.144.198	>9_TGG_KTTQD.74.198	>10_TGG_KSVMQ.68.198	>11_TGA_KSVAQ.101.198	>12_TGA_RGVAA.104.198	>13_TCT_ATVKA.151.198	>14_TCG_KGTQM.48.198	>15_TCC_RMIKS.68.198	>17_TAT_TRVSA.41.198	>18_TAG_RLTQA.75.198	>19_TAG_RMVSA.59.198	>20_TAC_QRVSA.60.198	>21_TAC_ERVSV.74.198	>22_TAA_RITAA.65.198	>23_GTT_GTRAY.120.198	>24_GTG_HLIQY.40.198	>25_GTA_YTRQV.94.198	>26_GGT_ALKNM.36.198	>27_GGT_LTKDQ.146.198	>28_GGG_RSKER.238.198	>29_GGC_TLKNQ.160.198	>30_GGA_LAKDQ.134.198	>31_GCT_KITKF.65.198	>32_GCC_VRLKY.51.198	>33_GCA_ALRQQ.46.198	>34_GAT_RTMRY.35.198	>35_GAG_VMRWY.54.198	>36_GAC_ATRRF.58.198	>37_GAA_RFQKF.30.198	>38_CTA_LHYAK.56.198	>39_CTA_IFNAK.43.198	>40_CGG_STRER.26.198	>41_CGC_RVMSR.71.198	>42_CGA_TFYAA.23.198	>43_CCT_MTNGK.116.198	>44_CCT_RGDSK.69.198	>45_CCG_RCYEK.106.198	>46_CCC_RLDSK.33.198	>47_CCA_KMTQK.295.198	>48_CCA_EHNAK.198.198	>49_CAT_LSQSR.119.198	>51_CAG_MSHWR.81.198	>52_CAC_LGMRR.110.198
	NNTAATTAGTANN	NNTGCCTTAATTNN	NNTAATTATGANN	NNTCATTATGANN	NNCTTATTAGANN	NNCCCGTAATTANN	NNCTCATTAACTNN	NNTCCCATTAGTANN	NNCCCATAATGANN	NNCTCATTATANN	NNTCATTATGGNN	NNCGGATTAATCNN	NNTCATTAATGNN	NNGGGTTAATCCNN	NNTGCATTAAGANN	NNTCATTAAGTNN	NNCATATTAATTNN	NNCGCATTAAANN	NNAGTGTCAGGGNN	NNCTTATTAATGNN	NNGTACTTAAGANN	NNTGGATAAGTGNN	NNCTACTTAAATNN	NNGCGCCTTAAGCNN	NNCTCCTTATCANN	NNTCTTTAAGGGNN	NNCCGCCTTAGTANN	NNTCCCTAAGGANN	NNTGCTTAAGCNN	NNTCATTAAGCCNN	NNGGCATAAGTANN	NNCCGTCTTATGNN	NNACCTCTTCGTNN	NNCGTCCAGATTGNN	NNGAGTTAAGCCNN	NNCTAGTTACTNN	NNTAGTTAACCNN	NNGTCCGTTAACANN	NNACGCGTTAGANN	NNTCTCGTTATTNN	NNTGCCCTAACCNN	NNTGGGTTAAGCNN	NNACGGTTAGTGNN	NNTGCGCATCCANN	NNCTAGTTATCANN	NNTGTTTAACCANN	NNTTTATTAACANN	NNCCTGTCAGCANN	NNATGTGTTTAGNN
	>1_TTT_RTVAA.61.199	>2_TTT_RTVSA.63.199	>4_TTC_VRVSA.61.199	>5_TTC_TRVAA.90.199	>6_TTA_VRVAA.106.199	>7_TTA_RVLRA.197.199	>8_TGT_RVVSQ.144.199	>9_TGG_KTTQD.74.199	>10_TGG_KSVMQ.67.199	>11_TGA_KSVAQ.100.199	>12_TGA_RGVAA.103.199	>13_TCT_ATVKA.149.199	>14_TCG_KGTQM.48.199	>15_TCC_RMIKS.67.199	>17_TAT_TRVSA.41.199	>18_TAG_RLTQA.75.199	>19_TAG_RMVSA.58.199	>20_TAC_QRVSA.58.199	>21_TAC_ERVSV.73.199	>22_TAA_RITAA.64.199	>23_GTT_GTRAY.120.199	>24_GTG_HLIQY.40.199	>25_GTA_YTRQV.94.199	>26_GGT_ALKNM.36.199	>27_GGT_LTKDQ.144.199	>28_GGG_RSKER.238.199	>29_GGC_TLKNQ.160.199	>30_GGA_LAKDQ.134.199	>31_GCT_KITKF.64.199	>32_GCC_VRLKY.50.199	>33_GCA_ALRQQ.46.199	>34_GAT_RTMRY.35.199	>35_GAG_VMRWY.54.199	>36_GAC_ATRRF.58.199	>37_GAA_RFQKF.30.199	>38_CTA_LHYAK.55.199	>39_CTA_IFNAK.43.199	>40_CGG_STRER.25.199	>41_CGC_RVMSR.71.199	>42_CGA_TFYAA.22.199	>43_CCT_MTNGK.116.199	>44_CCT_RGDSK.69.199	>45_CCG_RCYEK.105.199	>46_CCC_RLDSK.33.199	>47_CCA_KMTQK.294.199	>48_CCA_EHNAK.196.199	>49_CAT_LSQSR.118.199	>51_CAG_MSHWR.79.199	>52_CAC_LGMRR.110.199
	NNCGCCTAATTANN	NNCTAATTAACGNN	NNCTCCTTAATANN	NNTAGCTAATTANN	NNCTAATTACCGNN	NNAAGCTAATTANN	NNCGAGATAATGNN	NNTCCCATTATTNN	NNGTACTAATGANN	NNATTCATTATCNN	NNCTCATTAACNN	NNATCCTAATCCNN	NNCCCATTAACGNN	NNGGGATTAGCGNN	NNTCGTATTAAGNN	NNTCAATTAATNN	NNTTTGCTAATTNN	NNCGTATTATTTNN	NNCCGCATTAGCGNN	NNTTAATTAGCGNN	NNGCTACTTAGCNN	NNCCACTTATTCNN	NNCATACTTAACNN	NNGTCCAGACTGNN	NNGCTCCTTAGGNN	NNTCCCCTTAGTNN	NNGCCTTAGTANN	NNTCTCCTTAACNN	NNGGGTTTTAACNN	NNTGTCTTAGCGNN	NNTTTACAAGTANN	NNAGTTCTTAAGANN	NNCCTCTTAATNN	NNCCGTCTTACCNN	NNAGTTCTTAGANN	NNCTAGTTATTTNN	NNCTCGTTAGAGNN	NNTTAAGCCCCCNN	NNTCACGTTAAGNN	NNGCTCGTTATGCNN	NNGCGGGTTAATNN	NNTCGGGTTAACGNN	NNTTGGTTAAACNN	NNTTCGCATCGANN	NNAGTCTAACCANN	NNGGTAGTTATGNN	NNCACACTAACANN	NNCCCTGTCAAANN	NNCTGTGTCAATNN
	>1_TTT_RTVAA.60.200	>2_TTT_RTVSA.62.200	>4_TTC_VRVSA.61.200	>5_TTC_TRVAA.89.200	>6_TTA_VRVAA.106.200	>7_TTA_RVLRA.194.200	>8_TGT_RVVSQ.144.200	>9_TGG_KTTQD.74.200	>10_TGG_KSVMQ.67.200	>11_TGA_KSVAQ.99.200	>12_TGA_RGVAA.103.200	>13_TCT_ATVKA.148.200	>14_TCG_KGTQM.48.200	>15_TCC_RMIKS.67.200	>17_TAT_TRVSA.41.200	>18_TAG_RLTQA.74.200	>19_TAG_RMVSA.58.200	>20_TAC_QRVSA.58.200	>21_TAC_ERVSV.73.200	>22_TAA_RITAA.63.200	>23_GTT_GTRAY.119.200	>24_GTG_HLIQY.40.200	>25_GTA_YTRQV.93.200	>26_GGT_ALKNM.36.200	>27_GGT_LTKDQ.144.200	>28_GGG_RSKER.236.200	>29_GGC_TLKNQ.160.200	>30_GGA_LAKDQ.133.200	>31_GCT_KITKF.64.200	>32_GCC_VRLKY.50.200	>33_GCA_ALRQQ.45.200	>34_GAT_RTMRY.34.200	>35_GAG_VMRWY.54.200	>36_GAC_ATRRF.57.200	>37_GAA_RFQKF.30.200	>38_CTA_LHYAK.55.200	>39_CTA_IFNAK.43.200	>40_CGG_STRER.25.200	>41_CGC_RVMSR.70.200	>42_CGA_TFYAA.22.200	>43_CCT_MTNGK.115.200	>44_CCT_RGDSK.68.200	>45_CCG_RCYEK.105.200	>46_CCC_RLDSK.33.200	>47_CCA_KMTQK.294.200	>48_CCA_EHNAK.194.200	>49_CAT_LSQSR.117.200	>51_CAG_MSHWR.79.200	>52_CAC_LGMRR.110.200
	NNCTAATTATAANN	NNTCTGCTAATANN	NNCGTATTAGAGNN	NNTCATTAATTANN	NNCCTAATTAGGGNN	NNCTTGTAATTANN	NNGTCCCTAATGNN	NNGTCCATTAATTNN	NNATGCATAATGNN	NNCCTCATTAGANN	NNTTCATTAGTANN	NNCCGGATTAATGNN	NNTCCCATTATCNN	NNAGGATTATGANN	NNTGTATTAATGNN	NNCTAATTAATNN	NNCGAATTAAGGNN	NNTCATTAGTGNN	NNGCGCATTAGTGNN	NNCTCATTAGACNN	NNTCCTGACAGTNN	NNCCACTTAGCTNN	NNAGCATAAGTANN	NNCTAATTATGANN	NNTTCCTTAGTNN	NNTCCCCTTAATGNN	NNCGCCTTAGGANN	NNTCCTTAGTGNN	NNCCGTCTTAAGNN	NNCTCTTAAGACNN	NNTCTACTTAAANN	NNCATCTTAATANN	NNGCCTCTTCGCNN	NNCGTCTTGTTANN	NNCGTTCTTAAGNN	NNCCTAGTTAACGNN	NNCCTAGTTACTNN	NNCCGTTAAGGNN	NNAAGCCTAACANN	NNCCTCGTTAGCANN	NNTTGGTTAGGANN	NNGGAGGTTAATNN	NNTCAGTTAATANN	NNGGGTTAGTTNN	NNTTTTTAACCANN	NNGATGGTTAATNN	NNCGTGTTAGTCNN	NNGCCTGTTACANN	NNTGTGTTAGTCNN
	>1_TTT_RTVAA.60.201	>2_TTT_RTVSA.62.201	>4_TTC_VRVSA.60.201	>5_TTC_TRVAA.89.201	>6_TTA_VRVAA.105.201	>7_TTA_RVLRA.194.201	>8_TGT_RVVSQ.144.201	>9_TGG_KTTQD.73.201	>10_TGG_KSVMQ.67.201	>11_TGA_KSVAQ.97.201	>12_TGA_RGVAA.102.201	>13_TCT_ATVKA.144.201	>14_TCG_KGTQM.48.201	>15_TCC_RMIKS.66.201	>17_TAT_TRVSA.40.201	>18_TAG_RLTQA.73.201	>19_TAG_RMVSA.58.201	>20_TAC_QRVSA.58.201	>21_TAC_ERVSV.73.201	>22_TAA_RITAA.63.201	>23_GTT_GTRAY.119.201	>24_GTG_HLIQY.39.201	>25_GTA_YTRQV.93.201	>26_GGT_ALKNM.35.201	>27_GGT_LTKDQ.142.201	>28_GGG_RSKER.236.201	>29_GGC_TLKNQ.159.201	>30_GGA_LAKDQ.132.201	>31_GCT_KITKF.63.201	>32_GCC_VRLKY.50.201	>33_GCA_ALRQQ.45.201	>34_GAT_RTMRY.34.201	>35_GAG_VMRWY.53.201	>36_GAC_ATRRF.55.201	>37_GAA_RFQKF.30.201	>38_CTA_LHYAK.54.201	>39_CTA_IFNAK.42.201	>40_CGG_STRER.25.201	>41_CGC_RVMSR.70.201	>42_CGA_TFYAA.20.201	>43_CCT_MTNGK.115.201	>44_CCT_RGDSK.68.201	>45_CCG_RCYEK.104.201	>46_CCC_RLDSK.33.201	>47_CCA_KMTQK.292.201	>48_CCA_EHNAK.193.201	>49_CAT_LSQSR.115.201	>51_CAG_MSHWR.79.201	>52_CAC_LGMRR.109.201
	NNTGTTAATTANN	NNTACGTTAATANN	NNTCGTATTATGNN	NNGCTAATTAGANN	NNATGCTCGCAGNN	NNTCTGTAATTANN	NNCCCATTAATANN	NNCCATTAATGNN	NNTACATTAGTANN	NNTGATTAATGANN	NNCTCATTACAANN	NNAGATTAGTANN	NNCTAATTAATGNN	NNGCGGATTTATNN	NNCCTATTAATGNN	NNTGCGCATCGANN	NNGCTACTAATANN	NNTTAATTAATANN	NNCGTATTTATGNN	NNGTTAATTAACNN	NNGTCTAAGTANN	NNCTGCTAAGTGNN	NNCTAATTATGANN	NNTCGCCTTAAACNN	NNTCCTTAGCANN	NNTCCCTCAACNN	NNTCGCCTTACANN	NNTCTCCTTAGANN	NNCCGAGTAAGANN	NNGGCGTAAGCCNN	NNAAGATAAGTANN	NNGTTGTTAAGANN	NNCCTCTTATTGNN	NNGTCTTAGAGNN	NNCTTCTTAAACNN	NNTCTAGTTAAACNN	NNCTCGTTAACGNN	NNCGTTCTTTAANN	NNCCGCGTTATGNN	NNTCGTTAAATNN	NNCCTAGTTAAGNN	NNCCGGGTTAACGNN	NNCTGGTTAAATNN	NNTTAATGGATNN	NNAATTTAACCANN	NNCTTTTAACTANN	NNTCGTGTTACANN	NNCCTGTTTAGTNN	NNGTGTGCTATANN
	>1_TTT_RTVAA.60.202	>2_TTT_RTVSA.62.202	>4_TTC_VRVSA.60.202	>5_TTC_TRVAA.88.202	>6_TTA_VRVAA.103.202	>7_TTA_RVLRA.194.202	>8_TGT_RVVSQ.143.202	>9_TGG_KTTQD.73.202	>10_TGG_KSVMQ.66.202	>11_TGA_KSVAQ.96.202	>12_TGA_RGVAA.102.202	>13_TCT_ATVKA.144.202	>14_TCG_KGTQM.48.202	>15_TCC_RMIKS.65.202	>17_TAT_TRVSA.40.202	>18_TAG_RLTQA.73.202	>19_TAG_RMVSA.58.202	>20_TAC_QRVSA.58.202	>21_TAC_ERVSV.73.202	>22_TAA_RITAA.62.202	>23_GTT_GTRAY.119.202	>24_GTG_HLIQY.39.202	>25_GTA_YTRQV.93.202	>26_GGT_ALKNM.35.202	>27_GGT_LTKDQ.142.202	>28_GGG_RSKER.235.202	>29_GGC_TLKNQ.158.202	>30_GGA_LAKDQ.132.202	>31_GCT_KITKF.63.202	>32_GCC_VRLKY.50.202	>33_GCA_ALRQQ.44.202	>34_GAT_RTMRY.34.202	>35_GAG_VMRWY.53.202	>36_GAC_ATRRF.54.202	>37_GAA_RFQKF.29.202	>38_CTA_LHYAK.53.202	>39_CTA_IFNAK.42.202	>40_CGG_STRER.25.202	>41_CGC_RVMSR.70.202	>42_CGA_TFYAA.20.202	>43_CCT_MTNGK.111.202	>44_CCT_RGDSK.68.202	>45_CCG_RCYEK.103.202	>46_CCC_RLDSK.32.202	>47_CCA_KMTQK.289.202	>48_CCA_EHNAK.193.202	>49_CAT_LSQSR.115.202	>51_CAG_MSHWR.78.202	>52_CAC_LGMRR.109.202
	NNGATTTAATTANN	NNTGTCTTAATANN	NNGTAATTAGTANN	NNTCATTAATGNN	NNTAATTAAAGNN	NNACTAATTAAGNN	NNTCCCCTAATGNN	NNTCCATTAAGNN	NNCCCATTAATTNN	NNACGTTAATGANN	NNTTCATTAAGTNN	NNCCGGATTACTNN	NNCCCAATTAAANN	NNCGGATTAATCCNN	NNAATGCTAATGNN	NNACCAATTAATNN	NNCATATTAGGANN	NNCGAATTAAGGNN	NNCGCATTAGTTNN	NNCCTATTAATGNN	NNCCACTAAGTANN	NNACTATAAGTGNN	NNTTCCCAAGTANN	NNCGCCTTACGNN	NNTCCTTAAGCNN	NNCCCCTTATTGNN	NNCCGCCTTAGAGNN	NNACTCCTTTAANN	NNCGTCTTATGNN	NNCGTCTTAGCANN	NNATCTAAGTANN	NNCCATCTTAAGNN	NNCCTCTTACCCNN	NNCGTCTTTAGANN	NNTCTACTTAAANN	NNCTAGTTATTCNN	NNACTCGTTAATANN	NNAGTTCTTAAGNN	NNACGTGTTAAANN	NNACTTGTTAAANN	NNTTTGGTTAGANN	NNGTCCAGATGGNN	NNACTGGTTAAGNN	NNGCTAAAACGCNN	NNGATTTAACCANN	NNGATGGTCAAGNN	NNGCATGTTAGANN	NNCTGTCTATANN	NNGTGTGTCATGNN
	>1_TTT_RTVAA.59.203	>2_TTT_RTVSA.62.203	>4_TTC_VRVSA.60.203	>5_TTC_TRVAA.87.203	>6_TTA_VRVAA.101.203	>7_TTA_RVLRA.193.203	>8_TGT_RVVSQ.142.203	>9_TGG_KTTQD.72.203	>10_TGG_KSVMQ.65.203	>11_TGA_KSVAQ.95.203	>12_TGA_RGVAA.101.203	>13_TCT_ATVKA.143.203	>14_TCG_KGTQM.48.203	>15_TCC_RMIKS.65.203	>17_TAT_TRVSA.40.203	>18_TAG_RLTQA.72.203	>19_TAG_RMVSA.58.203	>20_TAC_QRVSA.56.203	>21_TAC_ERVSV.73.203	>22_TAA_RITAA.62.203	>23_GTT_GTRAY.119.203	>24_GTG_HLIQY.39.203	>25_GTA_YTRQV.92.203	>26_GGT_ALKNM.35.203	>27_GGT_LTKDQ.140.203	>28_GGG_RSKER.235.203	>29_GGC_TLKNQ.157.203	>30_GGA_LAKDQ.131.203	>31_GCT_KITKF.62.203	>32_GCC_VRLKY.49.203	>33_GCA_ALRQQ.44.203	>34_GAT_RTMRY.33.203	>35_GAG_VMRWY.52.203	>36_GAC_ATRRF.54.203	>37_GAA_RFQKF.29.203	>38_CTA_LHYAK.53.203	>39_CTA_IFNAK.42.203	>40_CGG_STRER.25.203	>41_CGC_RVMSR.70.203	>42_CGA_TFYAA.20.203	>43_CCT_MTNGK.111.203	>44_CCT_RGDSK.68.203	>45_CCG_RCYEK.101.203	>46_CCC_RLDSK.32.203	>47_CCA_KMTQK.288.203	>48_CCA_EHNAK.192.203	>49_CAT_LSQSR.114.203	>51_CAG_MSHWR.77.203	>52_CAC_LGMRR.109.203
	NNCTTAATTAGANN	NNGCACATTAAGNN	NNTCCGCTAATANN	NNCCTAATTAATNN	NNCCTAATTAACANN	NNGACTTAATGANN	NNCGCATTATTANN	NNACCCATTAAGANN	NNTGCATTAGCANN	NNTTAATTAAGGNN	NNGCTAATTATCNN	NNCGGATTAAAANN	NNCTCATTAAGGNN	NNAGGATTATAANN	NNGTATTATCANN	NNCTTGTTAACGNN	NNCTCATTAGGGNN	NNTCGCATTAGTNN	NNCACATTAAGGNN	NNGAGGTAAATGNN	NNGCTGTAAGTANN	NNACACTTAGTANN	NNGGGCTAAGTANN	NNGTAATTAGTANN	NNCTCCTTACTTNN	NNCCCCTCAAGTNN	NNGCGCCTTAAGGNN	NNGAATTAAGGANN	NNCGGCTTAATNN	NNCGCCTTAAGCCNN	NNTCTCCAAGTANN	NNGCGTCTTAAANN	NNCCTCTCCACNN	NNGCGTCTTGTANN	NNCCTTCTTAAGNN	NNGATGGTTATCNN	NNCTCGTTAGTNN	NNTCCCGTTACTANN	NNATGCTATCTTNN	NNGCTCGTTTGCNN	NNCCCTAACATGNN	NNGCACGTTAGTNN	NNTGAGTCACCANN	NNTCGTTTCCCTNN	NNCCTTTAACTANN	NNCGTTTAACCANN	NNTTGATTAACANN	NNCCTGTCAATANN	NNATGTGTCAGANN
	>1_TTT_RTVAA.59.204	>2_TTT_RTVSA.62.204	>4_TTC_VRVSA.60.204	>5_TTC_TRVAA.87.204	>6_TTA_VRVAA.101.204	>7_TTA_RVLRA.193.204	>8_TGT_RVVSQ.142.204	>9_TGG_KTTQD.72.204	>10_TGG_KSVMQ.65.204	>11_TGA_KSVAQ.94.204	>12_TGA_RGVAA.101.204	>13_TCT_ATVKA.143.204	>14_TCG_KGTQM.48.204	>15_TCC_RMIKS.65.204	>17_TAT_TRVSA.40.204	>18_TAG_RLTQA.71.204	>19_TAG_RMVSA.58.204	>20_TAC_QRVSA.54.204	>21_TAC_ERVSV.73.204	>22_TAA_RITAA.62.204	>23_GTT_GTRAY.118.204	>24_GTG_HLIQY.39.204	>25_GTA_YTRQV.92.204	>26_GGT_ALKNM.35.204	>27_GGT_LTKDQ.140.204	>28_GGG_RSKER.235.204	>29_GGC_TLKNQ.156.204	>30_GGA_LAKDQ.131.204	>31_GCT_KITKF.62.204	>32_GCC_VRLKY.49.204	>33_GCA_ALRQQ.43.204	>34_GAT_RTMRY.33.204	>35_GAG_VMRWY.52.204	>36_GAC_ATRRF.54.204	>37_GAA_RFQKF.29.204	>38_CTA_LHYAK.52.204	>39_CTA_IFNAK.41.204	>40_CGG_STRER.24.204	>41_CGC_RVMSR.69.204	>42_CGA_TFYAA.20.204	>43_CCT_MTNGK.110.204	>44_CCT_RGDSK.68.204	>45_CCG_RCYEK.100.204	>46_CCC_RLDSK.32.204	>47_CCA_KMTQK.285.204	>48_CCA_EHNAK.190.204	>49_CAT_LSQSR.114.204	>51_CAG_MSHWR.77.204	>52_CAC_LGMRR.109.204
	NNCTTATTAGCANN	NNGCTCATTAAGNN	NNCAAGTTAATANN	NNTCTAATTAAGNN	NNCTCATTAAAANN	NNTCCCTAATTANN	NNCTCATTAAANN	NNCCCCATTAAGGNN	NNACTCATTAAGNN	NNCACTTAATGANN	NNGCCCATTAAGNN	NNTCTCTAATCCNN	NNTCCCATTATANN	NNGGATTAGATNN	NNCTCATTATTANN	NNGCTTGTTACANN	NNCATATTAAGANN	NNCGTATTAGCGNN	NNCGTATTTAGANN	NNCGCATTAGCANN	NNCTACTTATAANN	NNGTTCTAAGTGNN	NNAAGTTAAGTANN	NNGCGCCTTTTANN	NNCCCCTAAGGANN	NNCCCCCTTAAGNN	NNCCGCCTTAAGGNN	NNTCCTGACAGTNN	NNCGGCTTACTANN	NNTGTCTTAACANN	NNCCTCTAAGTANN	NNCCGTCTTAGTGNN	NNGCCTCTTCGGNN	NNCGTCTTTGCANN	NNCCTACTTATCNN	NNCTGGTTAGTGNN	NNTCTCGTTATCNN	NNCCCGTTATCGNN	NNAGTGTTAACGNN	NNCCTCGTTAAGANN	NNTCAGGTTATANN	NNTCTGGTTACANN	NNATCGGTTAAANN	NNGTCCNGATTGNN	NNCGACTAACTANN	NNCTGGTTAGTGNN	NNTCTTGTAACANN	NNCTGTTAGCANN	NNTGTGTTACGGNN
	>1_TTT_RTVAA.59.205	>2_TTT_RTVSA.61.205	>4_TTC_VRVSA.59.205	>5_TTC_TRVAA.86.205	>6_TTA_VRVAA.100.205	>7_TTA_RVLRA.193.205	>8_TGT_RVVSQ.142.205	>9_TGG_KTTQD.71.205	>10_TGG_KSVMQ.65.205	>11_TGA_KSVAQ.93.205	>12_TGA_RGVAA.99.205	>13_TCT_ATVKA.142.205	>14_TCG_KGTQM.47.205	>15_TCC_RMIKS.65.205	>17_TAT_TRVSA.40.205	>18_TAG_RLTQA.70.205	>19_TAG_RMVSA.57.205	>20_TAC_QRVSA.54.205	>21_TAC_ERVSV.72.205	>22_TAA_RITAA.62.205	>23_GTT_GTRAY.117.205	>24_GTG_HLIQY.39.205	>25_GTA_YTRQV.92.205	>26_GGT_ALKNM.35.205	>27_GGT_LTKDQ.138.205	>28_GGG_RSKER.234.205	>29_GGC_TLKNQ.155.205	>30_GGA_LAKDQ.131.205	>31_GCT_KITKF.62.205	>32_GCC_VRLKY.48.205	>33_GCA_ALRQQ.43.205	>34_GAT_RTMRY.33.205	>35_GAG_VMRWY.52.205	>36_GAC_ATRRF.54.205	>37_GAA_RFQKF.29.205	>38_CTA_LHYAK.51.205	>39_CTA_IFNAK.41.205	>40_CGG_STRER.24.205	>41_CGC_RVMSR.69.205	>42_CGA_TFYAA.20.205	>43_CCT_MTNGK.110.205	>44_CCT_RGDSK.65.205	>45_CCG_RCYEK.99.205	>46_CCC_RLDSK.32.205	>47_CCA_KMTQK.285.205	>48_CCA_EHNAK.187.205	>49_CAT_LSQSR.113.205	>51_CAG_MSHWR.76.205	>52_CAC_LGMRR.108.205
	NNCTTGTTAATTNN	NNGTTATTAATANN	NNACATTAGCANN	NNCCCGTAATTANN	NNCCTAATTAGGTNN	NNTGGATAATTANN	NNCTTCTTAATGNN	NNCCCGTTCGTGNN	NNTTACATTAACNN	NNTAGTTAATTANN	NNGCCCATTACANN	NNCCGGATTAGGNN	NNCCAATTAGAANN	NNTACATAATCCNN	NNCCCATTAATGNN	NNCTTGTTAATTNN	NNCGCGTTAATTNN	NNCGTATTACATNN	NNGTATTAAATNN	NNTCATTAGCGNN	NNTCTCCAAGTANN	NNTTTATAAGTGNN	NNGTAATAAGTANN	NNGAACACTACTNN	NNGTCCTTAAGGNN	NNATTCTAAGGGNN	NNCGCCTCAAGGNN	NNCCTCCTTAATANN	NNTTCACTAAGCNN	NNTCGATAAGCCNN	NNTCCTAAGTANN	NNCGTCCTTAAGANN	NNCCTCTTTCAANN	NNCGTCTTGACTNN	NNGGCTTAAGCCNN	NNTCTAGTTAAATNN	NNACTCGTTACTNN	NNCCCGTTAGTNN	NNGCGTTAAAGNN	NNTTGTTAGAGNN	NNGTTCGTTAACNN	NNTCTGGTTAAANN	NNAACGGTTAAGNN	NNGCACGTTAAANN	NNTAGATAACCANN	NNGGGCTAACCANN	NNCGCGATAACANN	NNTCCTGTTTAGNN	NNGCGTGTTTCGNN
	>1_TTT_RTVAA.59.206	>2_TTT_RTVSA.61.206	>4_TTC_VRVSA.59.206	>5_TTC_TRVAA.86.206	>6_TTA_VRVAA.99.206	>7_TTA_RVLRA.192.206	>8_TGT_RVVSQ.142.206	>9_TGG_KTTQD.71.206	>10_TGG_KSVMQ.65.206	>11_TGA_KSVAQ.92.206	>12_TGA_RGVAA.98.206	>13_TCT_ATVKA.141.206	>14_TCG_KGTQM.46.206	>15_TCC_RMIKS.65.206	>17_TAT_TRVSA.39.206	>18_TAG_RLTQA.70.206	>19_TAG_RMVSA.57.206	>20_TAC_QRVSA.53.206	>21_TAC_ERVSV.72.206	>22_TAA_RITAA.62.206	>23_GTT_GTRAY.116.206	>24_GTG_HLIQY.39.206	>25_GTA_YTRQV.92.206	>26_GGT_ALKNM.34.206	>27_GGT_LTKDQ.137.206	>28_GGG_RSKER.234.206	>29_GGC_TLKNQ.151.206	>30_GGA_LAKDQ.130.206	>31_GCT_KITKF.62.206	>32_GCC_VRLKY.48.206	>33_GCA_ALRQQ.43.206	>34_GAT_RTMRY.33.206	>35_GAG_VMRWY.51.206	>36_GAC_ATRRF.52.206	>37_GAA_RFQKF.29.206	>38_CTA_LHYAK.51.206	>39_CTA_IFNAK.40.206	>40_CGG_STRER.24.206	>41_CGC_RVMSR.69.206	>42_CGA_TFYAA.20.206	>43_CCT_MTNGK.110.206	>44_CCT_RGDSK.65.206	>45_CCG_RCYEK.98.206	>46_CCC_RLDSK.32.206	>47_CCA_KMTQK.282.206	>48_CCA_EHNAK.186.206	>49_CAT_LSQSR.113.206	>51_CAG_MSHWR.76.206	>52_CAC_LGMRR.108.206
	NNGTTTTAATTANN	NNCTCATTATCANN	NNCTCATTATGANN	NNTCCGTAATTANN	NNATAATTAGTGNN	NNAGATTAATTANN	NNCTCATTATGTNN	NNGGCTGAGTCNN	NNCCCATTAGACNN	NNGCTAATTAAGNN	NNCCCATTAGTANN	NNCGGATTACTGNN	NNCCCCATTAGTANN	NNGGAGATTAAGNN	NNGCACATTAAGNN	NNCCCAATTAAAANN	NNGATGCTAATTNN	NNCGCATTACANN	NNCGCATTACAANN	NNCCAATTAATANN	NNTACTTAGAANN	NNACCTTAAGTANN	NNAGTAGAAGTANN	NNGCACCTTAAGTNN	NNCTCCTTTAANN	NNCCCCTTACTNN	NNCCGCCTTACGNN	NNCTCCTTACCTNN	NNTTACTTAAGCNN	NNGACTAAAGCCNN	NNCATGTAAGTANN	NNCATCTTAGGGNN	NNCCCTCTTAACGNN	NNCCGTCTTAAGCNN	NNGGTTCTTACCNN	NNTCTAGTTAGTGNN	NNTCGTTAACANN	NNTCCCGTTAGTGNN	NNATTCTTAACANN	NNACTAGTTATCNN	NNCTTAGTTAGTNN	NNGCGTTAACCANN	NNTTGGTTAGAGNN	NNCGGGTTTAANN	NNGATCTAACTANN	NNTCTAGTTATGNN	NNCATGTTAGCGNN	NNCCTGTTATTCNN	NNCGTGTCAGAANN
	>1_TTT_RTVAA.58.207	>2_TTT_RTVSA.61.207	>4_TTC_VRVSA.59.207	>5_TTC_TRVAA.85.207	>6_TTA_VRVAA.98.207	>7_TTA_RVLRA.191.207	>8_TGT_RVVSQ.140.207	>9_TGG_KTTQD.71.207	>10_TGG_KSVMQ.64.207	>11_TGA_KSVAQ.92.207	>12_TGA_RGVAA.98.207	>13_TCT_ATVKA.140.207	>14_TCG_KGTQM.46.207	>15_TCC_RMIKS.64.207	>17_TAT_TRVSA.39.207	>18_TAG_RLTQA.69.207	>19_TAG_RMVSA.57.207	>20_TAC_QRVSA.53.207	>21_TAC_ERVSV.71.207	>22_TAA_RITAA.61.207	>23_GTT_GTRAY.115.207	>24_GTG_HLIQY.38.207	>25_GTA_YTRQV.91.207	>26_GGT_ALKNM.33.207	>27_GGT_LTKDQ.135.207	>28_GGG_RSKER.232.207	>29_GGC_TLKNQ.151.207	>30_GGA_LAKDQ.128.207	>31_GCT_KITKF.62.207	>32_GCC_VRLKY.48.207	>33_GCA_ALRQQ.43.207	>34_GAT_RTMRY.32.207	>35_GAG_VMRWY.51.207	>36_GAC_ATRRF.52.207	>37_GAA_RFQKF.28.207	>38_CTA_LHYAK.50.207	>39_CTA_IFNAK.40.207	>40_CGG_STRER.23.207	>41_CGC_RVMSR.68.207	>42_CGA_TFYAA.19.207	>43_CCT_MTNGK.109.207	>44_CCT_RGDSK.64.207	>45_CCG_RCYEK.97.207	>46_CCC_RLDSK.31.207	>47_CCA_KMTQK.281.207	>48_CCA_EHNAK.185.207	>49_CAT_LSQSR.112.207	>51_CAG_MSHWR.76.207	>52_CAC_LGMRR.107.207
	NNCCTAATTACANN	NNCACATTAAAANN	NNGCATATTAATNN	NNGGTAATTAACNN	NNCCTAATTAATANN	NNCAAATTAGCGNN	NNAGCCATAATGNN	NNCCCATTATTNN	NNTACATTAAAGNN	NNGTTCATTATGNN	NNCCTCATTAACNN	NNTTCATAATCCNN	NNGTCCAGATTTNN	NNCAGGATTAAGNN	NNACTCTTAATGNN	NNTAATTAACGNN	NNCACATTAGAANN	NNCGCATTACGANN	NNGCGCATTTAGNN	NNCCTAATTAGGGNN	NNTCCCCAAGTANN	NNACCACTTAGGNN	NNCTAATTAATGNN	NNGCACCTTAGAGNN	NNTTCCTTTAGANN	NNGCCCTAAGGGNN	NNACACCTTAACNN	NNGCGCTAAGGANN	NNTGGCTTAACANN	NNCGGTTAAGAANN	NNCTACTTAGTTNN	NNCTAGTTAAGANN	NNGCCTCTCCAGNN	NNGCGTCTTCACNN	NNGGGTTTTAAANN	NNGCTAGTTTATNN	NNGCTAGTTAAGGNN	NNGTAGCCAATGNN	NNAAGCTTAACANN	NNCTCGTTAGCCNN	NNTATGGTTAAGNN	NNGAAGGTTAACNN	NNTCCGGTTATCNN	NNGCAGGTTATCNN	NNATGCTAACCANN	NNGCTCGTTAATNN	NNTCGACTAACANN	NNCTGTTAATTNN	NNTGTGTCAAAANN
	>1_TTT_RTVAA.58.208	>2_TTT_RTVSA.61.208	>4_TTC_VRVSA.59.208	>5_TTC_TRVAA.84.208	>6_TTA_VRVAA.98.208	>7_TTA_RVLRA.191.208	>8_TGT_RVVSQ.140.208	>9_TGG_KTTQD.71.208	>10_TGG_KSVMQ.64.208	>11_TGA_KSVAQ.91.208	>12_TGA_RGVAA.97.208	>13_TCT_ATVKA.140.208	>14_TCG_KGTQM.46.208	>15_TCC_RMIKS.64.208	>17_TAT_TRVSA.39.208	>18_TAG_RLTQA.69.208	>19_TAG_RMVSA.56.208	>20_TAC_QRVSA.53.208	>21_TAC_ERVSV.71.208	>22_TAA_RITAA.60.208	>23_GTT_GTRAY.115.208	>24_GTG_HLIQY.38.208	>25_GTA_YTRQV.91.208	>26_GGT_ALKNM.33.208	>27_GGT_LTKDQ.133.208	>28_GGG_RSKER.232.208	>29_GGC_TLKNQ.151.208	>30_GGA_LAKDQ.128.208	>31_GCT_KITKF.61.208	>32_GCC_VRLKY.48.208	>33_GCA_ALRQQ.43.208	>34_GAT_RTMRY.32.208	>35_GAG_VMRWY.51.208	>36_GAC_ATRRF.52.208	>37_GAA_RFQKF.28.208	>38_CTA_LHYAK.50.208	>39_CTA_IFNAK.40.208	>40_CGG_STRER.23.208	>41_CGC_RVMSR.68.208	>42_CGA_TFYAA.19.208	>43_CCT_MTNGK.109.208	>44_CCT_RGDSK.64.208	>45_CCG_RCYEK.97.208	>46_CCC_RLDSK.31.208	>47_CCA_KMTQK.280.208	>48_CCA_EHNAK.185.208	>49_CAT_LSQSR.112.208	>51_CAG_MSHWR.76.208	>52_CAC_LGMRR.106.208
	NNCTTGTTAATGNN	NNCACATTAAGTNN	NNTGCATTAGGANN	NNGTATTAATTANN	NNCCTAATTAACCNN	NNGGATTAATTANN	NNGGAATTAATGNN	NNCCCCATTAGGGNN	NNGCACATTAAGNN	NNTTCATTAACTNN	NNCTCATTATGTNN	NNGGGATTAAGGNN	NNTCCATTATGGNN	NNGCGTTAATCCNN	NNGCATTAATGNN	NNCCTTGTTAAANN	NNCGCGCTAATANN	NNCGCATTATGNN	NNTGGTTAATTANN	NNTTATGAAATANN	NNTATCTAAGTANN	NNATGTTAAGTGNN	NNCCTACTTAGGNN	NNGTCCAGATTTNN	NNGGCTTAAGGANN	NNCCCCCTTATANN	NNTCGCCTTAAGGNN	NNCTTCCTTAGANN	NNAGGCTTAGTANN	NNCTGCTAAGACNN	NNGCTACTCAAANN	NNATCCGTAAGANN	NNCCCTCTCATANN	NNCGTCTTGGANN	NNCTACTTAAGNN	NNGGTAGTTATGNN	NNCTAGTTATGTNN	NNGAGTTTGAGANN	NNCCATGTTAAGNN	NNCTCGTTAGGCNN	NNGTGGTTAACCNN	NNCGCGTTAACGNN	NNCTGGTTACCANN	NNCGGGTTTAGGNN	NNGGCCTAACCANN	NNGTTTTAACTANN	NNGTCCCTAACANN	NNTGTTAGCAGNN	NNTGTGTTAATANN
	>1_TTT_RTVAA.58.209	>2_TTT_RTVSA.61.209	>4_TTC_VRVSA.59.209	>5_TTC_TRVAA.82.209	>6_TTA_VRVAA.97.209	>7_TTA_RVLRA.189.209	>8_TGT_RVVSQ.140.209	>9_TGG_KTTQD.70.209	>10_TGG_KSVMQ.64.209	>11_TGA_KSVAQ.90.209	>12_TGA_RGVAA.96.209	>13_TCT_ATVKA.140.209	>14_TCG_KGTQM.46.209	>15_TCC_RMIKS.63.209	>17_TAT_TRVSA.39.209	>18_TAG_RLTQA.69.209	>19_TAG_RMVSA.56.209	>20_TAC_QRVSA.53.209	>21_TAC_ERVSV.70.209	>22_TAA_RITAA.59.209	>23_GTT_GTRAY.114.209	>24_GTG_HLIQY.38.209	>25_GTA_YTRQV.90.209	>26_GGT_ALKNM.32.209	>27_GGT_LTKDQ.133.209	>28_GGG_RSKER.230.209	>29_GGC_TLKNQ.150.209	>30_GGA_LAKDQ.125.209	>31_GCT_KITKF.61.209	>32_GCC_VRLKY.47.209	>33_GCA_ALRQQ.43.209	>34_GAT_RTMRY.32.209	>35_GAG_VMRWY.50.209	>36_GAC_ATRRF.51.209	>37_GAA_RFQKF.28.209	>38_CTA_LHYAK.49.209	>39_CTA_IFNAK.38.209	>40_CGG_STRER.23.209	>41_CGC_RVMSR.67.209	>42_CGA_TFYAA.19.209	>43_CCT_MTNGK.107.209	>44_CCT_RGDSK.63.209	>45_CCG_RCYEK.97.209	>46_CCC_RLDSK.31.209	>47_CCA_KMTQK.279.209	>48_CCA_EHNAK.183.209	>49_CAT_LSQSR.112.209	>51_CAG_MSHWR.76.209	>52_CAC_LGMRR.106.209
	NNCTGCTAATTANN	NNGTTCTTAATGNN	NNGCGCATTATCNN	NNGTTAATTAAANN	NNTCCTTAATTANN	NNCTCATTAGACNN	NNGCTATTAATGNN	NNCCATTAAGGNN	NNCTCATTACAANN	NNTCATTAAGGNN	NNACTCATTAAANN	NNCAGATTAGTANN	NNCCCCATTATANN	NNCGGATAATCCNN	NNTGAATTAATGNN	NNCCAATTACANN	NNCACATTAACCNN	NNCGTATTATGCNN	NNCGTATTACCGNN	NNGCCTTAATTANN	NNCCCTCAAGTANN	NNCCCACTTAGGNN	NNCAGTTAAGTANN	NNCCGCCTTAATGNN	NNCTTCCTTATGNN	NNAACTTAAGGGNN	NNCGCCTTTACANN	NNATTCCTTAATNN	NNACGACTCAGTNN	NNGTCTTAGGANN	NNACACTAAGTANN	NNATTTTTAAGANN	NNACCTCTTACGNN	NNCGTCTTAATNN	NNGGCTGAGTCNN	NNCTAGTTATTNN	NNCTAGTTAGANN	NNCCCGTTACGANN	NNACATGTTAAGNN	NNCTAGTTAAGANN	NNCTTAGTTAGANN	NNCGGGTTAGGNN	NNCCAGTTAGCANN	NNACGGGTTACTNN	NNCTAGTTAGACNN	NNGGTGGTTACTNN	NNCGCCCTAACANN	NNCCTGTTATACNN	NNCTGTGTCATANN
	>1_TTT_RTVAA.58.210	>2_TTT_RTVSA.60.210	>4_TTC_VRVSA.58.210	>5_TTC_TRVAA.81.210	>6_TTA_VRVAA.96.210	>7_TTA_RVLRA.189.210	>8_TGT_RVVSQ.139.210	>9_TGG_KTTQD.68.210	>10_TGG_KSVMQ.64.210	>11_TGA_KSVAQ.89.210	>12_TGA_RGVAA.96.210	>13_TCT_ATVKA.140.210	>14_TCG_KGTQM.44.210	>15_TCC_RMIKS.63.210	>17_TAT_TRVSA.39.210	>18_TAG_RLTQA.69.210	>19_TAG_RMVSA.56.210	>20_TAC_QRVSA.52.210	>21_TAC_ERVSV.68.210	>22_TAA_RITAA.58.210	>23_GTT_GTRAY.114.210	>24_GTG_HLIQY.38.210	>25_GTA_YTRQV.89.210	>26_GGT_ALKNM.32.210	>27_GGT_LTKDQ.132.210	>28_GGG_RSKER.229.210	>29_GGC_TLKNQ.150.210	>30_GGA_LAKDQ.125.210	>31_GCT_KITKF.60.210	>32_GCC_VRLKY.47.210	>33_GCA_ALRQQ.43.210	>34_GAT_RTMRY.32.210	>35_GAG_VMRWY.50.210	>36_GAC_ATRRF.50.210	>37_GAA_RFQKF.28.210	>38_CTA_LHYAK.49.210	>39_CTA_IFNAK.38.210	>40_CGG_STRER.22.210	>41_CGC_RVMSR.67.210	>42_CGA_TFYAA.19.210	>43_CCT_MTNGK.106.210	>44_CCT_RGDSK.63.210	>45_CCG_RCYEK.97.210	>46_CCC_RLDSK.31.210	>47_CCA_KMTQK.278.210	>48_CCA_EHNAK.181.210	>49_CAT_LSQSR.111.210	>51_CAG_MSHWR.76.210	>52_CAC_LGMRR.106.210
	NNTCTAATTAAGNN	NNTGCCTTAATANN	NNAGTGTTAATANN	NNTATGTAATTANN	NNACTCATTAACNN	NNTTAATTAAGTNN	NNGCACTTAATGNN	NNGCCCATTACGTNN	NNTCCATTATGGNN	NNTTAATTAACGNN	NNCCCATTAGGGNN	NNCGGATTAAACNN	NNCTCATTATGANN	NNACTGCTAATCNN	NNCTCATTAGCGNN	NNCTATTAAGGNN	NNGTTGTTAATGNN	NNCGCATTAACNN	NNCGCATTTAAANN	NNCAAATTAATANN	NNCTACTTAAGTANN	NNCCACTTACGGNN	NNCTACTTATANN	NNGTCCAGTTTGNN	NNCTCCTTTAATNN	NNCTCACTTAAANN	NNGCACCTTAGCNN	NNCTCCTTATCANN	NNTCGGCTTAACNN	NNTTCCTAAGACNN	NNAGCCTGAGTANN	NNCGTCTTACGGNN	NNCCTCTTTGTGNN	NNCCGTCTTAATANN	NNCTACTTAACGNN	NNTAGTTAACTNN	NNCTCGTTAAACNN	NNCTCCGTTAGGNN	NNTCCTGACAGTNN	NNTCGTTAAGGNN	NNACAGGTTATANN	NNTGGGTTAGANN	NNACGGTTAACGNN	NNGCGGGTTAGCNN	NNACTGGTTACGNN	NNAGTGGTTATANN	NNTTCCCTAACANN	NNGCCTGTTAAANN	NNCGTGTTAGATNN
	>1_TTT_RTVAA.57.211	>2_TTT_RTVSA.60.211	>4_TTC_VRVSA.58.211	>5_TTC_TRVAA.81.211	>6_TTA_VRVAA.96.211	>7_TTA_RVLRA.189.211	>8_TGT_RVVSQ.138.211	>9_TGG_KTTQD.68.211	>10_TGG_KSVMQ.63.211	>11_TGA_KSVAQ.89.211	>12_TGA_RGVAA.96.211	>13_TCT_ATVKA.138.211	>14_TCG_KGTQM.44.211	>15_TCC_RMIKS.62.211	>17_TAT_TRVSA.39.211	>18_TAG_RLTQA.69.211	>19_TAG_RMVSA.56.211	>20_TAC_QRVSA.52.211	>21_TAC_ERVSV.68.211	>22_TAA_RITAA.58.211	>23_GTT_GTRAY.113.211	>24_GTG_HLIQY.38.211	>25_GTA_YTRQV.88.211	>26_GGT_ALKNM.32.211	>27_GGT_LTKDQ.131.211	>28_GGG_RSKER.228.211	>29_GGC_TLKNQ.150.211	>30_GGA_LAKDQ.123.211	>31_GCT_KITKF.60.211	>32_GCC_VRLKY.47.211	>33_GCA_ALRQQ.43.211	>34_GAT_RTMRY.32.211	>35_GAG_VMRWY.50.211	>36_GAC_ATRRF.50.211	>37_GAA_RFQKF.27.211	>38_CTA_LHYAK.49.211	>39_CTA_IFNAK.38.211	>40_CGG_STRER.22.211	>41_CGC_RVMSR.66.211	>42_CGA_TFYAA.19.211	>43_CCT_MTNGK.106.211	>44_CCT_RGDSK.63.211	>45_CCG_RCYEK.96.211	>46_CCC_RLDSK.31.211	>47_CCA_KMTQK.278.211	>48_CCA_EHNAK.179.211	>49_CAT_LSQSR.111.211	>51_CAG_MSHWR.75.211	>52_CAC_LGMRR.104.211
	NNTAATTAAAGNN	NNCGCGTTAATTNN	NNCCTATTAATGNN	NNTCGTTAATGANN	NNCCTAATTACAANN	NNGCTAATTAAGNN	NNGCACATTATGNN	NNCCATTACAGNN	NNACATTAAGGNN	NNTAATTAATTNN	NNTAACTAATTANN	NNAGGATTAACNN	NNTCCAATTATCNN	NNGGGATTAGTCNN	NNTAATTAGTANN	NNCTAATTAGAANN	NNCTTCTTAATGNN	NNGTATTATCANN	NNACGCATTAGCANN	NNGCTAATTAACCNN	NNTACTTGAGTANN	NNCTATTAAGTGNN	NNCTACTTAACNN	NNCCACCTTAAGANN	NNCTTCCTTAACANN	NNCCCCTCACANN	NNGCGCCTTTGCNN	NNGTCCAGATTGNN	NNGGCTTAATTNN	NNCGCTTAAGACNN	NNACTCCAAGTANN	NNCCGTCTTAAGANN	NNCCTCTTATAGNN	NNCCGTCTTAGGNN	NNGATTTAAGAANN	NNTCTAGTTAACCNN	NNCTCGTTAAAANN	NNCGCGTTATTGNN	NNCGTGTTAACNN	NNTCTTGTTAAGNN	NNAAAGGTTAAGNN	NNTGGGTTAAAGNN	NNACGGTTAAGGNN	NNTGCGCANCGANN	NNAAATTAACTANN	NNCCGCTAACTANN	NNGGAACTAACANN	NNCCTGTCACCANN	NNGCGTGTTTGTNN
	>1_TTT_RTVAA.57.212	>2_TTT_RTVSA.60.212	>4_TTC_VRVSA.58.212	>5_TTC_TRVAA.81.212	>6_TTA_VRVAA.95.212	>7_TTA_RVLRA.186.212	>8_TGT_RVVSQ.138.212	>9_TGG_KTTQD.68.212	>10_TGG_KSVMQ.63.212	>11_TGA_KSVAQ.89.212	>12_TGA_RGVAA.94.212	>13_TCT_ATVKA.137.212	>14_TCG_KGTQM.44.212	>15_TCC_RMIKS.61.212	>17_TAT_TRVSA.39.212	>18_TAG_RLTQA.68.212	>19_TAG_RMVSA.56.212	>20_TAC_QRVSA.51.212	>21_TAC_ERVSV.68.212	>22_TAA_RITAA.58.212	>23_GTT_GTRAY.112.212	>24_GTG_HLIQY.38.212	>25_GTA_YTRQV.88.212	>26_GGT_ALKNM.32.212	>27_GGT_LTKDQ.130.212	>28_GGG_RSKER.226.212	>29_GGC_TLKNQ.150.212	>30_GGA_LAKDQ.123.212	>31_GCT_KITKF.60.212	>32_GCC_VRLKY.47.212	>33_GCA_ALRQQ.43.212	>34_GAT_RTMRY.32.212	>35_GAG_VMRWY.50.212	>36_GAC_ATRRF.50.212	>37_GAA_RFQKF.27.212	>38_CTA_LHYAK.48.212	>39_CTA_IFNAK.38.212	>40_CGG_STRER.22.212	>41_CGC_RVMSR.66.212	>42_CGA_TFYAA.19.212	>43_CCT_MTNGK.106.212	>44_CCT_RGDSK.62.212	>45_CCG_RCYEK.96.212	>46_CCC_RLDSK.31.212	>47_CCA_KMTQK.278.212	>48_CCA_EHNAK.176.212	>49_CAT_LSQSR.111.212	>51_CAG_MSHWR.75.212	>52_CAC_LGMRR.104.212
	NNTTCATTATCANN	NNCGTGTTAATTNN	NNTTAATTAGTANN	NNTTTGTAATTANN	NNGGTAAAGCATNN	NNTCTAATTAAGNN	NNCACATTAACANN	NNTCCCATTACTNN	NNTCAATTAAGANN	NNATCATTAATGNN	NNTTAATTAGGTNN	NNGAGGATTAATNN	NNGCCATTAGTGNN	NNCCGGATTACANN	NNACATTAGCANN	NNCTTGTTATGGNN	NNGGTCTTAATGNN	NNCGTATTACTCNN	NNTGTATTAGTANN	NNCTAATTAGANN	NNGTCCCAAGTANN	NNGTCATAAGTGNN	NNGTGTTAAGTANN	NNTCAACGAGTGNN	NNTTCCTTATANN	NNTCCCTTAAATNN	NNTTTCAAGTCANN	NNGTCCTAAGGANN	NNGGCTTATGANN	NNTGCTTAAGCNN	NNAGTGTAAGTANN	NNATTGCTAAGANN	NNCCCTCTTAGAGNN	NNGCGTCTTTATNN	NNACTACTTATGNN	NNCTAGTTATGGNN	NNTCTAGTTAAGANN	NNCCCCGTTATCNN	NNCGTGTTAGCCNN	NNGATCGTTAACNN	NNATGGTTAAGANN	NNGTCCAGATCANN	NNCCGGTTAAGTNN	NNGTTACAGTTGNN	NNGAACTAACTANN	NNCCTGGTTAAANN	NNCTTGTTAGTGNN	NNTCCTGTTATCTNN	NNCGTGTTACATNN
	>1_TTT_RTVAA.56.213	>2_TTT_RTVSA.60.213	>4_TTC_VRVSA.58.213	>5_TTC_TRVAA.79.213	>6_TTA_VRVAA.95.213	>7_TTA_RVLRA.186.213	>8_TGT_RVVSQ.138.213	>9_TGG_KTTQD.67.213	>10_TGG_KSVMQ.63.213	>11_TGA_KSVAQ.87.213	>12_TGA_RGVAA.93.213	>13_TCT_ATVKA.137.213	>14_TCG_KGTQM.44.213	>15_TCC_RMIKS.61.213	>17_TAT_TRVSA.39.213	>18_TAG_RLTQA.68.213	>19_TAG_RMVSA.56.213	>20_TAC_QRVSA.51.213	>21_TAC_ERVSV.63.213	>22_TAA_RITAA.58.213	>23_GTT_GTRAY.110.213	>24_GTG_HLIQY.38.213	>25_GTA_YTRQV.87.213	>26_GGT_ALKNM.32.213	>27_GGT_LTKDQ.130.213	>28_GGG_RSKER.224.213	>29_GGC_TLKNQ.147.213	>30_GGA_LAKDQ.123.213	>31_GCT_KITKF.59.213	>32_GCC_VRLKY.46.213	>33_GCA_ALRQQ.42.213	>34_GAT_RTMRY.32.213	>35_GAG_VMRWY.50.213	>36_GAC_ATRRF.48.213	>37_GAA_RFQKF.27.213	>38_CTA_LHYAK.48.213	>39_CTA_IFNAK.38.213	>40_CGG_STRER.22.213	>41_CGC_RVMSR.66.213	>42_CGA_TFYAA.19.213	>43_CCT_MTNGK.106.213	>44_CCT_RGDSK.61.213	>45_CCG_RCYEK.95.213	>46_CCC_RLDSK.31.213	>47_CCA_KMTQK.278.213	>48_CCA_EHNAK.176.213	>49_CAT_LSQSR.111.213	>51_CAG_MSHWR.75.213	>52_CAC_LGMRR.103.213
	NNACTAATTAACNN	NNCGTATTATCANN	NNCTAATTAACCNN	NNGAGTTAATGANN	NNCCTTATTAGGNN	NNCGAATTAGTANN	NNGCCCCTAATGNN	NNGTCCAGATTANN	NNCTCCATTAACNN	NNCCTCATTAATGNN	NNACTAATTAAGNN	NNAGGATTAAANN	NNCCCATTACGGNN	NNCCGGATTATGNN	NNTCCGTTAATGNN	NNCTAATTAGGTNN	NNTCCGTTAATGNN	NNCGCATTGGTGNN	NNGCGCATTAACGNN	NNGCATTAGCANN	NNATTCCAAGTANN	NNCAATTAAGTGNN	NNAGTGTAAGTANN	NNCTAATTAGCGNN	NNCCTCCTTTAANN	NNCCACTTAGTGNN	NNGCGCCTCAGCNN	NNTTCCTTATACNN	NNCGTCTTAATTNN	NNTTTCTAAGAANN	NNCTACTTACGTNN	NNCCGTCTTAGGANN	NNCCTCTTCGANN	NNCGTCTTCAGCNN	NNTCTTCTTAAANN	NNGCTAGTTAATCNN	NNGCTAGTTAAGTNN	NNTCCGTTAATNN	NNTCGGCTAACANN	NNACTCGTTAGCANN	NNTGGGTTAAGCNN	NNTGCGCATCGANN	NNCTGGTTATCTNN	NNGTGGGTTAACNN	NNACCCTAACCANN	NNGATGCTAAACNN	NNCGTGTTAGAGNN	NNTGTTAAGGGNN	NNGTGTTAGGGNN
	>1_TTT_RTVAA.56.214	>2_TTT_RTVSA.60.214	>4_TTC_VRVSA.57.214	>5_TTC_TRVAA.78.214	>6_TTA_VRVAA.94.214	>7_TTA_RVLRA.186.214	>8_TGT_RVVSQ.138.214	>9_TGG_KTTQD.67.214	>10_TGG_KSVMQ.62.214	>11_TGA_KSVAQ.86.214	>12_TGA_RGVAA.93.214	>13_TCT_ATVKA.137.214	>14_TCG_KGTQM.43.214	>15_TCC_RMIKS.61.214	>17_TAT_TRVSA.39.214	>18_TAG_RLTQA.68.214	>19_TAG_RMVSA.56.214	>20_TAC_QRVSA.50.214	>21_TAC_ERVSV.63.214	>22_TAA_RITAA.57.214	>23_GTT_GTRAY.110.214	>24_GTG_HLIQY.38.214	>25_GTA_YTRQV.87.214	>26_GGT_ALKNM.31.214	>27_GGT_LTKDQ.130.214	>28_GGG_RSKER.223.214	>29_GGC_TLKNQ.147.214	>30_GGA_LAKDQ.122.214	>31_GCT_KITKF.59.214	>32_GCC_VRLKY.46.214	>33_GCA_ALRQQ.42.214	>34_GAT_RTMRY.31.214	>35_GAG_VMRWY.50.214	>36_GAC_ATRRF.48.214	>37_GAA_RFQKF.27.214	>38_CTA_LHYAK.48.214	>39_CTA_IFNAK.37.214	>40_CGG_STRER.22.214	>41_CGC_RVMSR.66.214	>42_CGA_TFYAA.19.214	>43_CCT_MTNGK.105.214	>44_CCT_RGDSK.60.214	>45_CCG_RCYEK.95.214	>46_CCC_RLDSK.30.214	>47_CCA_KMTQK.276.214	>48_CCA_EHNAK.174.214	>49_CAT_LSQSR.110.214	>51_CAG_MSHWR.74.214	>52_CAC_LGMRR.102.214
	NNTTTACTAATTNN	NNGGTCTTAATGNN	NNTTCATTAATGNN	NNTTAATTAACGNN	NNCCGTTAATTANN	NNCATTTAATTANN	NNGCGCATTATCNN	NNTCCCATTATGANN	NNCCCATTAACANN	NNTCTCATTAGCNN	NNCTCATTAATNN	NNACGGATTAATNN	NNCTCATTAAGANN	NNTCGGATTAACNN	NNGCGTATTACANN	NNCAATTAAAANN	NNCGACTTAATGNN	NNCGCATTAAATNN	NNGCGTATAAAANN	NNTCATTAAAGNN	NNTGCGCATCGANN	NNCCTACTTAAGNN	NNCTACTTAGGTNN	NNCACCTTAACANN	NNATCCTAAGGANN	NNAACCCTTAAGNN	NNGCGCCTTATCNN	NNTTCCTTATCGNN	NNCGTCTTAATCNN	NNTGGCTTAAGANN	NNAGCATAAGTANN	NNGTCTCACGANN	NNCCTCTTGATGNN	NNCGTCTCATGNN	NNCGTCTTAAGCNN	NNCCTAGTTAAAGNN	NNGCTCGTTTACNN	NNCCCGTTAGAGNN	NNTGTGTTAAGGNN	NNGCGGGTTATGNN	NNCCTGGTTAGCNN	NNTGGGTTAACTNN	NNTCGGTTACGANN	NNCGCGTTAACGNN	NNTTTCTAACCANN	NNCCCTTAACTANN	NNCTAGTTAACANN	NNCCTGTTTATANN	NNTGTGTTACGTNN
	>1_TTT_RTVAA.56.215	>2_TTT_RTVSA.59.215	>4_TTC_VRVSA.57.215	>5_TTC_TRVAA.78.215	>6_TTA_VRVAA.93.215	>7_TTA_RVLRA.182.215	>8_TGT_RVVSQ.137.215	>9_TGG_KTTQD.67.215	>10_TGG_KSVMQ.61.215	>11_TGA_KSVAQ.86.215	>12_TGA_RGVAA.92.215	>13_TCT_ATVKA.136.215	>14_TCG_KGTQM.43.215	>15_TCC_RMIKS.60.215	>17_TAT_TRVSA.39.215	>18_TAG_RLTQA.67.215	>19_TAG_RMVSA.55.215	>20_TAC_QRVSA.49.215	>21_TAC_ERVSV.63.215	>22_TAA_RITAA.57.215	>23_GTT_GTRAY.110.215	>24_GTG_HLIQY.37.215	>25_GTA_YTRQV.86.215	>26_GGT_ALKNM.31.215	>27_GGT_LTKDQ.129.215	>28_GGG_RSKER.222.215	>29_GGC_TLKNQ.145.215	>30_GGA_LAKDQ.122.215	>31_GCT_KITKF.59.215	>32_GCC_VRLKY.46.215	>33_GCA_ALRQQ.42.215	>34_GAT_RTMRY.31.215	>35_GAG_VMRWY.49.215	>36_GAC_ATRRF.47.215	>37_GAA_RFQKF.26.215	>38_CTA_LHYAK.47.215	>39_CTA_IFNAK.37.215	>40_CGG_STRER.21.215	>41_CGC_RVMSR.66.215	>42_CGA_TFYAA.19.215	>43_CCT_MTNGK.105.215	>44_CCT_RGDSK.59.215	>45_CCG_RCYEK.95.215	>46_CCC_RLDSK.30.215	>47_CCA_KMTQK.270.215	>48_CCA_EHNAK.173.215	>49_CAT_LSQSR.110.215	>51_CAG_MSHWR.74.215	>52_CAC_LGMRR.101.215
	NNTGTGCTAATTNN	NNCCATTAATANN	NNCTTAATTAAANN	NNCTCATTATTGNN	NNCTCATTACTNN	NNATGCTATCTTNN	NNATCTTTAATGNN	NNGCCCATTAAAGNN	NNTCTCATTAACNN	NNGGCTTAATGANN	NNGTCCATTAGTNN	NNTCGGATTAAANN	NNCCTATTAAGANN	NNATGGATTAAANN	NNTTTGTTAATGNN	NNGCCAATTAGCANN	NNGCCCTTAATGNN	NNCAAATTAATGNN	NNCGCATTAGGNN	NNCGCATTAACANN	NNCCCCTAAGTANN	NNTTGTTAAGTGNN	NNTTTGTAAGTANN	NNCTCCAGATTGNN	NNCCTCCTTAGTGNN	NNTGTTAAGGGNN	NNCGCCTTTACNN	NNACTCCTTAATNN	NNGATTTAAGCCNN	NNTTCCTAAGAANN	NNCTATTAAGTANN	NNACTCTTAAGANN	NNACTCTTAACANN	NNAGGGTTAAGANN	NNGATACTTAATNN	NNCCTAGTTATTGNN	NNTCTAGTTAGTNN	NNGCCCGTTACGNN	NNTCCACTAACANN	NNGCTCGTTAAGANN	NNATGGTTAATGNN	NNTTCTTAACCANN	NNGCCGGTTACANN	NNCCGGGTTAGTNN	NNTAGTTAAAANN	NNGATGGTTAGGNN	NNTCGGCTAACANN	NNACCTGTTAGANN	NNTTGTGTCAAGNN
	>1_TTT_RTVAA.56.216	>2_TTT_RTVSA.59.216	>4_TTC_VRVSA.57.216	>5_TTC_TRVAA.78.216	>6_TTA_VRVAA.93.216	>7_TTA_RVLRA.181.216	>8_TGT_RVVSQ.137.216	>9_TGG_KTTQD.66.216	>10_TGG_KSVMQ.61.216	>11_TGA_KSVAQ.85.216	>12_TGA_RGVAA.92.216	>13_TCT_ATVKA.135.216	>14_TCG_KGTQM.43.216	>15_TCC_RMIKS.60.216	>17_TAT_TRVSA.39.216	>18_TAG_RLTQA.67.216	>19_TAG_RMVSA.55.216	>20_TAC_QRVSA.49.216	>21_TAC_ERVSV.62.216	>22_TAA_RITAA.57.216	>23_GTT_GTRAY.108.216	>24_GTG_HLIQY.37.216	>25_GTA_YTRQV.85.216	>26_GGT_ALKNM.31.216	>27_GGT_LTKDQ.129.216	>28_GGG_RSKER.218.216	>29_GGC_TLKNQ.144.216	>30_GGA_LAKDQ.121.216	>31_GCT_KITKF.59.216	>32_GCC_VRLKY.46.216	>33_GCA_ALRQQ.41.216	>34_GAT_RTMRY.31.216	>35_GAG_VMRWY.49.216	>36_GAC_ATRRF.47.216	>37_GAA_RFQKF.26.216	>38_CTA_LHYAK.46.216	>39_CTA_IFNAK.37.216	>40_CGG_STRER.21.216	>41_CGC_RVMSR.66.216	>42_CGA_TFYAA.18.216	>43_CCT_MTNGK.104.216	>44_CCT_RGDSK.59.216	>45_CCG_RCYEK.94.216	>46_CCC_RLDSK.30.216	>47_CCA_KMTQK.270.216	>48_CCA_EHNAK.172.216	>49_CAT_LSQSR.110.216	>51_CAG_MSHWR.74.216	>52_CAC_LGMRR.101.216
	NNCAAATTAGTANN	NNGTCACTAATGNN	NNCGCTTAATTANN	NNATACTAATTANN	NNTCATTAGCGNN	NNCTTAATTAGANN	NNCTACTTAATGNN	NNTCCATTAACNN	NNATCAATTAAANN	NNTTTCATTAACNN	NNCTAATTATTTNN	NNTGATTAATCCNN	NNTCAATTAAAANN	NNCGTTTAATCCNN	NNTCATTAATGNN	NNCCTTATTATANN	NNTTTCTTAATGNN	NNCGCGCTAATANN	NNCGTTCTTTAANN	NNTAATTAGCCNN	NNGCCGTAAGTANN	NNCCCTCTTAAANN	NNGTCCCAAGTANN	NNGCGCATCGANN	NNTTCCTTAACTNN	NNCTCTTAAGGGNN	NNTCGCCTTAGGGNN	NNTTCCTTACAGNN	NNCAGCTTAAGCCNN	NNTGTCTTAGGANN	NNCTACTTAGAGNN	NNGTTCTTTAANN	NNACTCTTAATGNN	NNCGTCTCACATNN	NNCTACTTAGAANN	NNGCTGGTTAGTNN	NNGGTAGTTACANN	NNTCAACGAGTGNN	NNTAGCTTAACANN	NNCTCGTTAACNN	NNCTTCGTTAAGNN	NNTCAGGTTATGNN	NNGTCGGTTAAANN	NNGCTGGTTAGTNN	NNGCTTAACCANN	NNCCTAGTTAGANN	NNCAACTTAACANN	NNCCTGTTACCGNN	NNGTGTTAATGNN
	>1_TTT_RTVAA.55.217	>2_TTT_RTVSA.59.217	>4_TTC_VRVSA.57.217	>5_TTC_TRVAA.76.217	>6_TTA_VRVAA.92.217	>7_TTA_RVLRA.181.217	>8_TGT_RVVSQ.136.217	>9_TGG_KTTQD.66.217	>10_TGG_KSVMQ.61.217	>11_TGA_KSVAQ.85.217	>12_TGA_RGVAA.91.217	>13_TCT_ATVKA.133.217	>14_TCG_KGTQM.43.217	>15_TCC_RMIKS.60.217	>17_TAT_TRVSA.38.217	>18_TAG_RLTQA.66.217	>19_TAG_RMVSA.55.217	>20_TAC_QRVSA.49.217	>21_TAC_ERVSV.61.217	>22_TAA_RITAA.57.217	>23_GTT_GTRAY.108.217	>24_GTG_HLIQY.37.217	>25_GTA_YTRQV.85.217	>26_GGT_ALKNM.31.217	>27_GGT_LTKDQ.129.217	>28_GGG_RSKER.217.217	>29_GGC_TLKNQ.143.217	>30_GGA_LAKDQ.121.217	>31_GCT_KITKF.58.217	>32_GCC_VRLKY.45.217	>33_GCA_ALRQQ.41.217	>34_GAT_RTMRY.31.217	>35_GAG_VMRWY.49.217	>36_GAC_ATRRF.47.217	>37_GAA_RFQKF.26.217	>38_CTA_LHYAK.46.217	>39_CTA_IFNAK.37.217	>40_CGG_STRER.21.217	>41_CGC_RVMSR.66.217	>42_CGA_TFYAA.18.217	>43_CCT_MTNGK.104.217	>44_CCT_RGDSK.59.217	>45_CCG_RCYEK.93.217	>46_CCC_RLDSK.30.217	>47_CCA_KMTQK.270.217	>48_CCA_EHNAK.172.217	>49_CAT_LSQSR.109.217	>51_CAG_MSHWR.73.217	>52_CAC_LGMRR.101.217
	NNCTTAATTAACNN	NNATGCTTAATANN	NNTCGTATTAAGNN	NNCTCATTATAANN	NNCCTAATTTAGNN	NNTAATTAATTANN	NNGATACTAATGNN	NNCCCCATTATTNN	NNCCTCATTATGNN	NNGTCTTAATTANN	NNGTCCATTAAGNN	NNAGGATTAGCANN	NNTCAATTAGAGNN	NNGGGATTAGGANN	NNGCATTAGTGNN	NNGGTAAAGCATNN	NNGATGCTAATANN	NNCTGCTTAATANN	NNGCGTATTATTNN	NNGTTAATTAAANN	NNGCATTAAGTANN	NNTACGTAAGTGNN	NNCTACTCAAGGNN	NNCGCCTCAATANN	NNCTCCTTTGTGNN	NNCCCCTTATGTNN	NNGCGCCTCATGNN	NNAATCTAAGGANN	NNGTCTTAGGANN	NNCGTCTTAGTCNN	NNTCCCCAAGTANN	NNAAAGTTAAGANN	NNCCCTCTCCAANN	NNAGTGCTTCACNN	NNACTACTTAGANN	NNTCTAGTTAGTANN	NNCCTAGTTAAAANN	NNCATTGTACTANN	NNATAGTTAACANN	NNGCTCGTTAACNN	NNAGTGGTTAAANN	NNCGGGTTTAANN	NNCCCGGTTAGTNN	NNTGCGCATGGATNN	NNGCTCTAACTANN	NNATTTTAACCANN	NNCACTTTAACANN	NNCTGTTATAANN	NNTGTGTTAGTNN
	>1_TTT_RTVAA.55.218	>2_TTT_RTVSA.59.218	>4_TTC_VRVSA.57.218	>5_TTC_TRVAA.76.218	>6_TTA_VRVAA.92.218	>7_TTA_RVLRA.180.218	>8_TGT_RVVSQ.136.218	>9_TGG_KTTQD.65.218	>10_TGG_KSVMQ.60.218	>11_TGA_KSVAQ.84.218	>12_TGA_RGVAA.91.218	>13_TCT_ATVKA.133.218	>14_TCG_KGTQM.42.218	>15_TCC_RMIKS.59.218	>17_TAT_TRVSA.38.218	>18_TAG_RLTQA.66.218	>19_TAG_RMVSA.54.218	>20_TAC_QRVSA.49.218	>21_TAC_ERVSV.60.218	>22_TAA_RITAA.56.218	>23_GTT_GTRAY.107.218	>24_GTG_HLIQY.37.218	>25_GTA_YTRQV.85.218	>26_GGT_ALKNM.31.218	>27_GGT_LTKDQ.129.218	>28_GGG_RSKER.214.218	>29_GGC_TLKNQ.143.218	>30_GGA_LAKDQ.120.218	>31_GCT_KITKF.58.218	>32_GCC_VRLKY.45.218	>33_GCA_ALRQQ.41.218	>34_GAT_RTMRY.30.218	>35_GAG_VMRWY.49.218	>36_GAC_ATRRF.46.218	>37_GAA_RFQKF.26.218	>38_CTA_LHYAK.45.218	>39_CTA_IFNAK.36.218	>40_CGG_STRER.21.218	>41_CGC_RVMSR.65.218	>42_CGA_TFYAA.18.218	>43_CCT_MTNGK.103.218	>44_CCT_RGDSK.59.218	>45_CCG_RCYEK.92.218	>46_CCC_RLDSK.29.218	>47_CCA_KMTQK.269.218	>48_CCA_EHNAK.169.218	>49_CAT_LSQSR.109.218	>51_CAG_MSHWR.73.218	>52_CAC_LGMRR.101.218
	NNCACACTAATTNN	NNGCGCATTAATNN	NNCTCATTAATTNN	NNACGTATTGGTNN	NNTAATTAGTANN	NNTTAATTACGANN	NNCAAGCTAATGNN	NNTCCATTATGANN	NNAGGTTAATGANN	NNATTCATTAAANN	NNTCTCATTAATNN	NNCGGATTAATCCNN	NNTCCCATTAATGNN	NNACACTAATCCNN	NNCACATTAGCANN	NNCTCATTATCANN	NNTATATTAATGNN	NNCTCATTAGAGNN	NNCGTATTAGTNN	NNTCATTATGANN	NNTACTTAGCCNN	NNACTCTAAGTGNN	NNAGTCTAAGTANN	NNGTTCATTAAANN	NNCTCCTTATTCNN	NNCCCCTCACTGNN	NNCACCTTAACANN	NNCGCCTAAGGANN	NNCGTCTTATTANN	NNGGGCTTAATANN	NNATCCCAAGTANN	NNCGTCTTTATANN	NNCCTCTTATCNN	NNCGTCTCAGCTNN	NNGATTCTTATGNN	NNACTAGTTAGTGNN	NNCTCGTTAGCGNN	NNCCCGTTAGACNN	NNAAAGTTAACANN	NNCTCGTTAAAGNN	NNGTGGGTTAGTNN	NNTCGGGTTAAAGNN	NNCCAGTTAAGTNN	NNTCGGGTTAGCNN	NNGCATTAACCANN	NNAGTGGTTAGANN	NNGAAGCTAACANN	NNCCTGTTATGTNN	NNGCGTGCTACANN
	>1_TTT_RTVAA.55.219	>2_TTT_RTVSA.59.219	>4_TTC_VRVSA.57.219	>5_TTC_TRVAA.76.219	>6_TTA_VRVAA.90.219	>7_TTA_RVLRA.178.219	>8_TGT_RVVSQ.134.219	>9_TGG_KTTQD.64.219	>10_TGG_KSVMQ.60.219	>11_TGA_KSVAQ.83.219	>12_TGA_RGVAA.90.219	>13_TCT_ATVKA.132.219	>14_TCG_KGTQM.42.219	>15_TCC_RMIKS.59.219	>17_TAT_TRVSA.38.219	>18_TAG_RLTQA.65.219	>19_TAG_RMVSA.54.219	>20_TAC_QRVSA.48.219	>21_TAC_ERVSV.60.219	>22_TAA_RITAA.56.219	>23_GTT_GTRAY.107.219	>24_GTG_HLIQY.37.219	>25_GTA_YTRQV.83.219	>26_GGT_ALKNM.31.219	>27_GGT_LTKDQ.128.219	>28_GGG_RSKER.214.219	>29_GGC_TLKNQ.142.219	>30_GGA_LAKDQ.119.219	>31_GCT_KITKF.57.219	>32_GCC_VRLKY.45.219	>33_GCA_ALRQQ.41.219	>34_GAT_RTMRY.30.219	>35_GAG_VMRWY.48.219	>36_GAC_ATRRF.46.219	>37_GAA_RFQKF.26.219	>38_CTA_LHYAK.45.219	>39_CTA_IFNAK.36.219	>40_CGG_STRER.21.219	>41_CGC_RVMSR.65.219	>42_CGA_TFYAA.18.219	>43_CCT_MTNGK.103.219	>44_CCT_RGDSK.58.219	>45_CCG_RCYEK.92.219	>46_CCC_RLDSK.29.219	>47_CCA_KMTQK.268.219	>48_CCA_EHNAK.168.219	>49_CAT_LSQSR.108.219	>51_CAG_MSHWR.73.219	>52_CAC_LGMRR.101.219
	NNCTAATTAAGNN	NNGCGCATTAACNN	NNCGAATTAAAANN	NNCTTATTAACCNN	NNTCATTATGANN	NNTAGCTAATTANN	NNCTCTCTAATGNN	NNGCCCATTAAGTNN	NNCTAATTAGAGNN	NNTTCATAATGANN	NNTAATTAATANN	NNTAACTAATCCNN	NNGTTACTACCANN	NNAGGATTAACNN	NNAATCTTAATGNN	NNCTCGTTAAGGNN	NNCTCGCTAATTNN	NNGCATTAGAGNN	NNCCGTATTAAANN	NNCCCTAACATGNN	NNTCTATAAGTANN	NNTTCGTAAGTGNN	NNCTAGTAAGTANN	NNCCTAATTATCNN	NNCTTCCTTTAGNN	NNCCCCTCAAACNN	NNGAACTTGTCANN	NNGCTCCTTACANN	NNCGGCTTATGNN	NNTTGATAAGCCNN	NNTGCATAAGTANN	NNCCTGCTAAGANN	NNGCCTCTCTGGNN	NNCGTCTTGAGNN	NNGTTCTTTGTANN	NNGCTAGTTAGAGNN	NNCCTAGTTAAATNN	NNCACCGTTAAGNN	NNGTATTTAACANN	NNGCTAGTTAGTNN	NNAATGGTTAAANN	NNAAAGGTTAACNN	NNTCCGGTTATGNN	NNGCACGTTAAGNN	NNTGACTAACCANN	NNACTGGTTATTNN	NNGCGTGTAAAANN	NNCCCTGTTTGGNN	NNCCGTGTTAGANN
	>1_TTT_RTVAA.55.220	>2_TTT_RTVSA.58.220	>4_TTC_VRVSA.57.220	>5_TTC_TRVAA.76.220	>6_TTA_VRVAA.90.220	>7_TTA_RVLRA.177.220	>8_TGT_RVVSQ.133.220	>9_TGG_KTTQD.64.220	>10_TGG_KSVMQ.59.220	>11_TGA_KSVAQ.82.220	>12_TGA_RGVAA.90.220	>13_TCT_ATVKA.132.220	>14_TCG_KGTQM.42.220	>15_TCC_RMIKS.59.220	>17_TAT_TRVSA.38.220	>18_TAG_RLTQA.65.220	>19_TAG_RMVSA.54.220	>20_TAC_QRVSA.48.220	>21_TAC_ERVSV.59.220	>22_TAA_RITAA.55.220	>23_GTT_GTRAY.107.220	>24_GTG_HLIQY.37.220	>25_GTA_YTRQV.83.220	>26_GGT_ALKNM.30.220	>27_GGT_LTKDQ.126.220	>28_GGG_RSKER.214.220	>29_GGC_TLKNQ.142.220	>30_GGA_LAKDQ.118.220	>31_GCT_KITKF.57.220	>32_GCC_VRLKY.45.220	>33_GCA_ALRQQ.41.220	>34_GAT_RTMRY.30.220	>35_GAG_VMRWY.48.220	>36_GAC_ATRRF.45.220	>37_GAA_RFQKF.26.220	>38_CTA_LHYAK.45.220	>39_CTA_IFNAK.36.220	>40_CGG_STRER.20.220	>41_CGC_RVMSR.65.220	>42_CGA_TFYAA.18.220	>43_CCT_MTNGK.102.220	>44_CCT_RGDSK.58.220	>45_CCG_RCYEK.92.220	>46_CCC_RLDSK.28.220	>47_CCA_KMTQK.268.220	>48_CCA_EHNAK.166.220	>49_CAT_LSQSR.108.220	>51_CAG_MSHWR.73.220	>52_CAC_LGMRR.99.220
	NNATCAGTCCTTNN	NNCAAATTAAGANN	NNGTGCATTATANN	NNCTCATTAGGGNN	NNCTAATTAGANN	NNGCCCTAATTANN	NNCCACATAATGNN	NNCCCATTACAGNN	NNTTCATTAGGGNN	NNAGGTTAATGANN	NNTTAATTAATTNN	NNCAGGATTAAANN	NNCCAATTAAGTNN	NNAGGATTAAGGNN	NNCGCATTAACCNN	NNTCAATTATCANN	NNGCTAATTATCNN	NNCGTATTATCNN	NNCACATTAGAGNN	NNTTCATTAAGANN	NNCTACTTAACCNN	NNCCACTTAAATNN	NNTGCATAAGTANN	NNGTCCAGATNGNN	NNCCACTAAGGANN	NNGCCCCTCACANN	NNTCGCCTTTGTNN	NNCCTCCTTAATTNN	NNCGTCTTATAANN	NNTATATAAGCCNN	NNCTACTAAGTANN	NNAGCCTTAAGANN	NNCTCTCTAAANN	NNGTCTTAGGANN	NNATTCTTAAGANN	NNCTAGTTACGGNN	NNCCTAGTTAAGTNN	NNACCGTTAATANN	NNTACACTAACANN	NNAACTCGTTAGNN	NNGGAGGTTATANN	NNTCGTTAACCCNN	NNTTTGGTTATGNN	NNGCGGGTTAAAGNN	NNGTCATAACCANN	NNGTGTTAACTANN	NNTAATTAACANN	NNGCCCTGTTAANN	NNCCGTGTTAATGNN
	>1_TTT_RTVAA.55.221	>2_TTT_RTVSA.58.221	>4_TTC_VRVSA.57.221	>5_TTC_TRVAA.75.221	>6_TTA_VRVAA.90.221	>7_TTA_RVLRA.174.221	>8_TGT_RVVSQ.133.221	>9_TGG_KTTQD.64.221	>10_TGG_KSVMQ.59.221	>11_TGA_KSVAQ.82.221	>12_TGA_RGVAA.90.221	>13_TCT_ATVKA.132.221	>14_TCG_KGTQM.42.221	>15_TCC_RMIKS.59.221	>17_TAT_TRVSA.38.221	>18_TAG_RLTQA.65.221	>19_TAG_RMVSA.54.221	>20_TAC_QRVSA.47.221	>21_TAC_ERVSV.59.221	>22_TAA_RITAA.55.221	>23_GTT_GTRAY.105.221	>24_GTG_HLIQY.36.221	>25_GTA_YTRQV.83.221	>26_GGT_ALKNM.30.221	>27_GGT_LTKDQ.123.221	>28_GGG_RSKER.210.221	>29_GGC_TLKNQ.140.221	>30_GGA_LAKDQ.116.221	>31_GCT_KITKF.57.221	>32_GCC_VRLKY.45.221	>33_GCA_ALRQQ.41.221	>34_GAT_RTMRY.30.221	>35_GAG_VMRWY.48.221	>36_GAC_ATRRF.45.221	>37_GAA_RFQKF.26.221	>38_CTA_LHYAK.44.221	>39_CTA_IFNAK.36.221	>40_CGG_STRER.20.221	>41_CGC_RVMSR.65.221	>42_CGA_TFYAA.18.221	>43_CCT_MTNGK.102.221	>44_CCT_RGDSK.58.221	>45_CCG_RCYEK.92.221	>46_CCC_RLDSK.28.221	>47_CCA_KMTQK.268.221	>48_CCA_EHNAK.163.221	>49_CAT_LSQSR.108.221	>51_CAG_MSHWR.71.221	>52_CAC_LGMRR.97.221
	NNACTCATTAACNN	NNCGTATTAATCNN	NNTCGCATTAGTNN	NNGGATTAATTANN	NNTGGCTAATTANN	NNCTTAATTAACNN	NNAGCCTTAATGNN	NNGTCCATTAGAGNN	NNCCATTATCANN	NNTAATTAGGGNN	NNCCTAATTATGNN	NNAATTTAATCCNN	NNCCAATTAATCNN	NNGCATTAATCCNN	NNGCATTAATANN	NNCCAATTAGGNN	NNCTCATTATCANN	NNCGCATTATANN	NNGCTAATTAACNN	NNGTTCATTAAANN	NNCTCTAAGTANN	NNGGTCCTTAGGNN	NNCTACTAAGTANN	NNCCGCCTTAATANN	NNTTACTAAGGANN	NNTCCCTTAGAGNN	NNCCGCCTTTACNN	NNCCCCTTAGTGNN	NNGGTTTTAAGANN	NNTGCGTAAGAANN	NNCAGTTAAGTANN	NNCATCTTAGAGNN	NNATGTTAAGAGNN	NNGCGTCTTTACNN	NNTCTTCTTAACNN	NNTTAGTTAAGANN	NNGCTCGTCAAANN	NNCTCCGTTAACANN	NNAATCTTAACANN	NNGCGGGTTAAANN	NNGCTGGTTATANN	NNTCGCGTTAAGNN	NNCCTGGTTAGTGNN	NNTGCGCATTGANN	NNGCTAGTTATTNN	NNGATGGTCAACNN	NNCGGTTTAACANN	NNCCTGTCTATANN	NNACGTGTTAAGNN
	>1_TTT_RTVAA.55.222	>2_TTT_RTVSA.58.222	>4_TTC_VRVSA.56.222	>5_TTC_TRVAA.75.222	>6_TTA_VRVAA.89.222	>7_TTA_RVLRA.174.222	>8_TGT_RVVSQ.133.222	>9_TGG_KTTQD.64.222	>10_TGG_KSVMQ.59.222	>11_TGA_KSVAQ.81.222	>12_TGA_RGVAA.89.222	>13_TCT_ATVKA.131.222	>14_TCG_KGTQM.42.222	>15_TCC_RMIKS.59.222	>17_TAT_TRVSA.37.222	>18_TAG_RLTQA.65.222	>19_TAG_RMVSA.53.222	>20_TAC_QRVSA.47.222	>21_TAC_ERVSV.59.222	>22_TAA_RITAA.55.222	>23_GTT_GTRAY.104.222	>24_GTG_HLIQY.36.222	>25_GTA_YTRQV.83.222	>26_GGT_ALKNM.30.222	>27_GGT_LTKDQ.123.222	>28_GGG_RSKER.209.222	>29_GGC_TLKNQ.140.222	>30_GGA_LAKDQ.115.222	>31_GCT_KITKF.56.222	>32_GCC_VRLKY.45.222	>33_GCA_ALRQQ.40.222	>34_GAT_RTMRY.30.222	>35_GAG_VMRWY.48.222	>36_GAC_ATRRF.44.222	>37_GAA_RFQKF.26.222	>38_CTA_LHYAK.44.222	>39_CTA_IFNAK.36.222	>40_CGG_STRER.20.222	>41_CGC_RVMSR.65.222	>42_CGA_TFYAA.18.222	>43_CCT_MTNGK.101.222	>44_CCT_RGDSK.58.222	>45_CCG_RCYEK.92.222	>46_CCC_RLDSK.28.222	>47_CCA_KMTQK.268.222	>48_CCA_EHNAK.162.222	>49_CAT_LSQSR.107.222	>51_CAG_MSHWR.71.222	>52_CAC_LGMRR.94.222
	NNTCTACTAATTNN	NNCACATTAGGGNN	NNATCGTAGATTNN	NNCATCTAATTANN	NNTCATTAACGNN	NNGTTATAATTANN	NNCTCGCTAATGNN	NNGCTGTTATTTNN	NNGTGTTATGTTNN	NNGAGTTAATGANN	NNGCTTTAATTANN	NNCGGGATTACTNN	NNCCCATTACANN	NNTGATTAATCCNN	NNTGACTTAATGNN	NNCTCGTTAGGANN	NNATCGTTAATANN	NNCCGCATTAGCANN	NNCTCATTAGTGNN	NNCTAATTATTGNN	NNCTACTTAAGCNN	NNTTCTTAAGTANN	NNCACTCAAGTANN	NNAGGTTAAGGTNN	NNTTATTAAGGANN	NNGCCCCTTAATANN	NNCGCCTTTGTANN	NNCTTATAAGGANN	NNGGCTTACGTNN	NNCCTTTAAGCCNN	NNCTACTTACAGNN	NNCAGCTTAAGANN	NNACCTCTCAGANN	NNGTCTCAATGNN	NNCTTCTTAAGNN	NNACTGGTTAAANN	NNACTGGTTAAGNN	NNTTCCGTTAGANN	NNCGTGAGAACGNN	NNGCTCGTTCAGNN	NNGCTGGTTAGANN	NNTGGGTAACCCNN	NNATTGGTTAGGNN	NNTGCGCGTCGANN	NNCAGCTAACTANN	NNCTAGTTAAANN	NNGCATTAACANN	NNTCCTGTTAAGCNN	NNTTGTGCTAAANN
	>1_TTT_RTVAA.54.223	>2_TTT_RTVSA.57.223	>4_TTC_VRVSA.56.223	>5_TTC_TRVAA.75.223	>6_TTA_VRVAA.89.223	>7_TTA_RVLRA.174.223	>8_TGT_RVVSQ.132.223	>9_TGG_KTTQD.63.223	>10_TGG_KSVMQ.58.223	>11_TGA_KSVAQ.81.223	>12_TGA_RGVAA.89.223	>13_TCT_ATVKA.130.223	>14_TCG_KGTQM.41.223	>15_TCC_RMIKS.59.223	>17_TAT_TRVSA.37.223	>18_TAG_RLTQA.65.223	>19_TAG_RMVSA.53.223	>20_TAC_QRVSA.46.223	>21_TAC_ERVSV.59.223	>22_TAA_RITAA.54.223	>23_GTT_GTRAY.103.223	>24_GTG_HLIQY.36.223	>25_GTA_YTRQV.83.223	>26_GGT_ALKNM.30.223	>27_GGT_LTKDQ.123.223	>28_GGG_RSKER.209.223	>29_GGC_TLKNQ.139.223	>30_GGA_LAKDQ.115.223	>31_GCT_KITKF.56.223	>32_GCC_VRLKY.45.223	>33_GCA_ALRQQ.40.223	>34_GAT_RTMRY.30.223	>35_GAG_VMRWY.48.223	>36_GAC_ATRRF.44.223	>37_GAA_RFQKF.26.223	>38_CTA_LHYAK.43.223	>39_CTA_IFNAK.35.223	>40_CGG_STRER.20.223	>41_CGC_RVMSR.64.223	>42_CGA_TFYAA.17.223	>43_CCT_MTNGK.100.223	>44_CCT_RGDSK.57.223	>45_CCG_RCYEK.91.223	>46_CCC_RLDSK.28.223	>47_CCA_KMTQK.264.223	>48_CCA_EHNAK.162.223	>49_CAT_LSQSR.106.223	>51_CAG_MSHWR.70.223	>52_CAC_LGMRR.92.223
[truncated: 4,247 more rows]
[truncated: 103 more columns]
