# Supplementary material for: Exploring the DNA-recognition potential of homeodomains
Source: HighWire-hosted journal article supplement (doi:10.1101/gr.139014.112), 2012-04-26
Supplement: SupTableS10.xlsx [file SupTableS10.xlsx]

## Sheet: Sheet1
Final sequence cloned into pB1H2ω2-12En between NotI and XbaI to create pBIH2ω2-12En(SB):
GCGGCCGCGGACTACAAGGATGACGACGACAAGTTCCGGACCGGCTCCAAGACCCCGCCGCACGGCACGGCGCGCCCATATGCTTGCCCTGTCGAGTCCTGCGATCGCCGCTTTTCTCGCTCGGATGAGCTTACCCGCCATATCCGCATCCACACAGGCCAGAAGCCCTTCCAGTGTCGAATCTGCATGCGTAACTTCAGTCGTAGTGACCACCTTACCACCCACATCCGCACCCACACCGGTACCGGCCGTGAGAAGCGTCCACGCACCGCGTTCTCCAGCGAGCAGTTGGCCCGCCTTAAGCGGGAGTTCAACGAGAATCGCTATCTGACCGAGCGGAGACGCCAGCAGCTGAGCAGCGAGCTCGGCCTGAACGAGGCGCAGATCAAGATCTGGTTC…
en K55 library:
CGGCCTGAACGAGNNSCAGATCNNSNNSTGGTTCNNSAACAAGCGGNNSAAGATCAAGAAGTCGG
en Library 5p comp:
CTCGTTCAGGCCGAGCT
en Library 3p comp:
GATCCCGACTTCTTGATCTT
