# Supplementary material for: Exploring the DNA-recognition potential of homeodomains
Source: HighWire-hosted journal article supplement (doi:10.1101/gr.139014.112), 2012-04-26
Supplement: SupTableS11.xlsx [file SupTableS11.xlsx]

## Sheet: Sheet1
ATA_LRWNS_Top
CGAGctcCAGATCcgctggTGGTTCaatAACAAGCGGagc
ATA_LRWNS_Bottom
TCTTGCTCCGCTTGTTATTGAACCACCAGCGGATCTGGAG
GCA_RHDRA_Top
CGAGcggCAGATCcacgacTGGTTCcggAACAAGCGGgcc
GCA_RHDRA_Bottom
TCTTGGCCCGCTTGTTCCGGAACCAGTCGTGGATCTGCCG
GCA_RYDRA_Top
CGAGcggCAGATCtacgacTGGTTCcggAACAAGCGGgcc
GCA_RYDRA_Bottom
TCTTGGCCCGCTTGTTCCGGAACCAGTCGTAGATCTGCCG
CTC_VMNRK_Top
CGAGgttCAGATCatgaacTGGTTCcggAACAAGCGGaaa
CTC_VMNRK_Bottom
TCTTTTTCCGCTTGTTCCGGAACCAGTTCATGATCTGAAC
GTC_YRRGA_Top
CGAGtacCAGATCcgtcggTGGTTCggtAACAAGCGGgcc
GTC_YRRGA_Bottom
TCTTGGCCCGCTTGTTACCGAACCACCGACGGATCTGGTA
GTC_YRRGF_Top
CGAGtacCAGATCcgtcggTGGTTCggtAACAAGCGGttc
GTC_YRRGF_Bottom
TCTTGAACCGCTTGTTACCGAACCACCGACGGATCTGGTA
AAG_RSQWH_Top
CGAGcgtCAGATCagccagTGGTTCtggAACAAGCGGcac
AAG_RSQWH_Bottom
TCTTGTGCCGCTTGTTCCAGAACCACTGGCTGATCTGACG
CTG_TTNQK_Top
CGAGactCAGATCaccaacTGGTTCcagAACAAGCGGaaa
CTG_TTNQK_Bottom
TCTTTTTCCGCTTGTTCTGGAACCAGTTGGTGATCTGAGT
GCG_RLDRY_Top
CGAGcggCAGATCctcgacTGGTTCcgtAACAAGCGGtac
GCG_RLDRY_Bottom
TCTTGTACCGCTTGTTACGGAACCAGTCGAGGATCTGCCG
GAT_VGRLY_Top
CGAGgttCAGATCggtcggTGGTTCctcAACAAGCGGtac
GAT_VGRLY_Bottom
TCTTGTACCGCTTGTTGAGGAACCACCGACCGATCTGAAC
GCG_RLDRF_Top
CGAGcggCAGATCctcgacTGGTTCcgtAACAAGCGGttc
GCG_RLDRF_Bottom
TCTTGAACCGCTTGTTACGGAACCAGTCGAGGATCTGCCG
